# Supplementary material
Source: MDPI journal article supplement (https://www.mdpi.com/2304-6740/10/1/2)
Supplement: s1 [file s1]

|                                | 260 | 270   | 280    | 290     | 300      |
|--------------------------------|-----|-------|--------|---------|----------|
| 151906                         | KL  | TSIT  | LSALTT | YISA    | YISAMCG  |
| sp A6VH54 CYDE_METM7           | KL  | KSL   | LAMLT  | YSS     | C.VNRGGI |
| sp A4FW56 CYDE_METM5           | KL  | IKSVL | LAMLT  | YSS     | C.VSKGGM |
| tr A0A21LCBR0 A0A21LCBR0_METM1 | KL  | IKSVL | LAMLT  | YSS     | C.VSKGGM |
| tr D5VSW9 D5VSW9_METIM         | KL  | LSIA  | LSSIMT | YISPMCG | C.VNRGGI |
| tr C7P8X1 C7P8X1_METFA         | KL  | IKSVL | LALTT  | YISAMCG | C.VNRGGI |
| tr F6BCV2 F6BCV2_METIK         | KL  | IKSVL | LALTT  | YISAMCG | C.VNRGGI |
| tr C9RFZ5 C9RFZ5_METVM         | KL  | IKSVL | LALTT  | YISAMCG | C.VNRGGI |
| tr H1KZQ8 H1KZQ8_9EURY         | KL  | IKSVL | LALTT  | YISAMCG | C.VNRGGI |
| tr N6VPY2 N6VPY2_9EURY         | KL  | IKSVL | LALTT  | YISAMCG | C.VNRGGI |
| tr U5Q566 U5Q566_9BACT         | KL  | IKSVL | LALTT  | YISAMCG | C.VNRGGI |
| tr A0A2M7BGU7 A0A2M7BGU7_9DELT | KL  | IKSVL | LALTT  | YISAMCG | C.VNRGGI |
| tr A0A1C7HIT9 A0A1C7HIT9_9BURK | KL  | IKSVL | LALTT  | YISAMCG | C.VNRGGI |
| tr R5API9 R5API9_9BACT         | KL  | IKSVL | LALTT  | YISAMCG | C.VNRGGI |
| tr R7RUE6 R7RUE6_9CLOT         | KL  | IKSVL | LALTT  | YISAMCG | C.VNRGGI |
| tr A0A250LQ15 A0A250LQ15_FUSVA | KL  | IKSVL | LALTT  | YISAMCG | C.VNRGGI |
| tr U2LETO U2LETO_TRESO         | KL  | IKSVL | LALTT  | YISAMCG | C.VNRGGI |
| tr A0A084JII4 A0A084JII4_9CLOT | KL  | IKSVL | LALTT  | YISAMCG | C.VNRGGI |
| tr A0A2G2HHS3 A0A2G2HHS3_9PROT | KL  | IKSVL | LALTT  | YISAMCG | C.VNRGGI |
| tr A0A1V5HI15 A0A1V5HI15_9BACT | KL  | IKSVL | LALTT  | YISAMCG | C.VNRGGI |
| tr A0A143XBT8 A0A143XBT8_9FIRM | KL  | IKSVL | LALTT  | YISAMCG | C.VNRGGI |
| tr U2BJC7 U2BJC7_9CLOT         | KL  | IKSVL | LALTT  | YISAMCG | C.VNRGGI |
| tr X8IRIO X8IRIO_9FIRM         | KL  | IKSVL | LALTT  | YISAMCG | C.VNRGGI |
| tr A0A1E3AMK7 A0A1E3AMK7_9FIRM | KL  | IKSVL | LALTT  | YISAMCG | C.VNRGGI |
| tr A0A2T0B041 A0A2T0B041_9CLOT | KL  | IKSVL | LALTT  | YISAMCG | C.VNRGGI |
| tr A0A173YXC3 A0A173YXC3_9CLOT | KL  | IKSVL | LALTT  | YISAMCG | C.VNRGGI |
| tr A0A133XRP4 A0A133XRP4_9BACT | KL  | IKSVL | LALTT  | YISAMCG | C.VNRGGI |
| tr I3YI50 I3YI50_ALIFI         | KL  | IKSVL | LALTT  | YISAMCG | C.VNRGGI |
| tr A0A2V1IKY6 A0A2V1IKY6_9BACT | KL  | IKSVL | LALTT  | YISAMCG | C.VNRGGI |
| tr A0A0H5Q1R2 A0A0H5Q1R2_9ZZZZ | KL  | IKSVL | LALTT  | YISAMCG | C.VNRGGI |
| tr A0A1M6V4H0 A0A1M6V4H0_9FIRM | KL  | IKSVL | LALTT  | YISAMCG | C.VNRGGI |
| tr A0A1Y4TVT2 A0A1Y4TVT2_9FIRM | KL  | IKSVL | LALTT  | YISAMCG | C.VNRGGI |
| tr A0A0S6U6Q0 A0A0S6U6Q0_CLOBO | KL  | IKSVL | LALTT  | YISAMCG | C.VNRGGI |
| tr A0A1Y4TNG6 A0A1Y4TNG6_9FIRM | KL  | IKSVL | LALTT  | YISAMCG | C.VNRGGI |
| tr R9M2E2 R9M2E2_9FIRM         | KL  | IKSVL | LALTT  | YISAMCG | C.VNRGGI |
| tr A0A174KZB3 A0A174KZB3_9FIRM | KL  | IKSVL | LALTT  | YISAMCG | C.VNRGGI |
| tr R5BLB6 R5BLB6_9FIRM         | KL  | IKSVL | LALTT  | YISAMCG | C.VNRGGI |
| tr N2AVU5 N2AVU5_9CLOT         | KL  | IKSVL | LALTT  | YISAMCG | C.VNRGGI |
| tr R6PEW0 R6PEW0_9CLOT         | KL  | IKSVL | LALTT  | YISAMCG | C.VNRGGI |
| tr V7I8Q4 V7I8Q4_9CLOT         | KL  | IKSVL | LALTT  | YISAMCG | C.VNRGGI |
| tr R6STQ3 R6STQ3_9CLOT         | KL  | IKSVL | LALTT  | YISAMCG | C.VNRGGI |
| tr A0A173QVX9 A0A173QVX9_9FIRM | KL  | IKSVL | LALTT  | YISAMCG | C.VNRGGI |
| tr A0A1C6J4L2 A0A1C6J4L2_9FIRM | KL  | IKSVL | LALTT  | YISAMCG | C.VNRGGI |
| tr R5IV32 R5IV32_9CLOT         | KL  | IKSVL | LALTT  | YISAMCG | C.VNRGGI |
| tr U7UMR5 U7UMR5_9FIRM         | KL  | IKSVL | LALTT  | YISAMCG | C.VNRGGI |
| tr COD015 COD015_9FIRM         | KL  | IKSVL | LALTT  | YISAMCG | C.VNRGGI |
| tr A0A1C5KLZ4 A0A1C5KLZ4_9CLOT | KL  | IKSVL | LALTT  | YISAMCG | C.VNRGGI |
| tr C5EER9 C5EER9_9FIRM         | KL  | IKSVL | LALTT  | YISAMCG | C.VNRGGI |
| tr A0A1Y4DID9 A0A1Y4DID9_9ACTN | KL  | IKSVL | LALTT  | YISAMCG | C.VNRGGI |
| tr E7GPD6 E7GPD6_CLOSY         | KL  | IKSVL | LALTT  | YISAMCG | C.VNRGGI |
| tr LOF518 LOF518_DESDL         | KL  | IKSVL | LALTT  | YISAMCG | C.VNRGGI |
| tr A0A1Y4GDP2 A0A1Y4GDP2_9BACT | KL  | IKSVL | LALTT  | YISAMCG | C.VNRGGI |
| tr M1PB31 M1PB31_DESSD         | KL  | IKSVL | LALTT  | YISAMCG | C.VNRGGI |
| tr A0A2G6FF81 A0A2G6FF81_9DELT | KL  | IKSVL | LALTT  | YISAMCG | C.VNRGGI |
| tr A0A2N1RFN9 A0A2N1RFN9_9SPIR | KL  | IKSVL | LALTT  | YISAMCG | C.VNRGGI |
| tr A0A2S5CD51 A0A2S5CD51_9ENTR | KL  | IKSVL | LALTT  | YISAMCG | C.VNRGGI |
| tr R1HF92 R1HF92_9GAMM         | KL  | IKSVL | LALTT  | YISAMCG | C.VNRGGI |
| tr R7JM93 R7JM93_9BACT         | KL  | IKSVL | LALTT  | YISAMCG | C.VNRGGI |
| tr A0A0J6CKL6 A0A0J6CKL6_9BACT | KL  | IKSVL | LALTT  | YISAMCG | C.VNRGGI |
| tr A0A1T5BYL2 A0A1T5BYL2_9BACT | KL  | IKSVL | LALTT  | YISAMCG | C.VNRGGI |
| tr A0A0P6X4H5 A0A0P6X4H5_9CHLR | KL  | IKSVL | LALTT  | YISAMCG | C.VNRGGI |
| tr R6G801 R6G801_9BACE         | KL  | IKSVL | LALTT  | YISAMCG | C.VNRGGI |
| tr A0A1M6WCW3 A0A1M6WCW3_PRERU | KL  | IKSVL | LALTT  | YISAMCG | C.VNRGGI |
| tr A0A171AVJ8 A0A171AVJ8_9BACT | KL  | IKSVL | LALTT  | YISAMCG | C.VNRGGI |
| tr K4LK2M K4LK2M_THEPS         | KL  | IKSVL | LALTT  | YISAMCG | C.VNRGGI |
| tr A0A1Y3UBV3 A0A1Y3UBV3_9FIRM | KL  | IKSVL | LALTT  | YISAMCG | C.VNRGGI |
| tr A0A1Q6GZB1 A0A1Q6GZB1_9BACE | KL  | IKSVL | LALTT  | YISAMCG | C.VNRGGI |
| tr A0A0P6X4H5 A0A0P6X4H5_9CHLR | KL  | IKSVL | LALTT  | YISAMCG | C.VNRGGI |
| tr R6G801 R6G801_9BACE         | KL  | IKSVL | LALTT  | YISAMCG | C.VNRGGI |
| tr A0A1W9VTS4 A0A1W9VTS4_9BACT | KL  | IKSVL | LALTT  | YISAMCG | C.VNRGGI |
| tr A0A1I7GWW5 A0A1I7GWW5_9PORP | KL  | IKSVL | LALTT  | YISAMCG | C.VNRGGI |
| tr A0A1Q3Q9S5 A0A1Q3Q9S5_9BACT | KL  | IKSVL | LALTT  | YISAMCG | C.VNRGGI |
| tr A0A2V1IY57 A0A2V1IY57_9BACT | KL  | IKSVL | LALTT  | YISAMCG | C.VNRGGI |
| tr A0A2I0N3P7 A0A2I0N3P7_9CLOT | KL  | IKSVL | LALTT  | YISAMCG | C.VNRGGI |
| tr C3W9F7 C3W9F7_FUSMR         | KL  | IKSVL | LALTT  | YISAMCG | C.VNRGGI |
| tr A0A0R3JRW1 A0A0R3JRW1_9CLOT | KL  | IKSVL | LALTT  | YISAMCG | C.VNRGGI |
| tr A0A1E9AGA9 A0A1E9AGA9_9FIRM | KL  | IKSVL | LALTT  | YISAMCG | C.VNRGGI |
| tr A0A1U7M087 A0A1U7M087_9FIRM | KL  | IKSVL | LALTT  | YISAMCG | C.VNRGGI |
| tr A0A1G7ZF40 A0A1G7ZF40_9BACT | KL  | IKSVL | LALTT  | YISAMCG | C.VNRGGI |
| tr A0A1M7SRV0 A0A1M7SRV0_FERGO | KL  | IKSVL | LALTT  | YISAMCG | C.VNRGGI |
| tr M5Q3B7 M5Q3B7_DESAF         | KL  | IKSVL | LALTT  | YISAMCG | C.VNRGGI |
| sp B8DLR0 Y1488_DESVM          | KL  | IKSVL | LALTT  | YISAMCG | C.VNRGGI |
| sp A1VGE6 Y2496_DESVV          | KL  | IKSVL | LALTT  | YISAMCG | C.VNRGGI |
| tr A0A101I220 A0A101I220_9BACT | KL  | IKSVL | LALTT  | YISAMCG | C.VNRGGI |
| tr A0A2V2G459 A0A2V2G459_9DELT | KL  | IKSVL | LALTT  | YISAMCG | C.VNRGGI |
| tr A0A212JX75 A0A212JX75_9DELT | KL  | IKSVL | LALTT  | YISAMCG | C.VNRGGI |
| tr A0A2N1RYH9 A0A2N1RYH9_9SPIR | KL  | IKSVL | LALTT  | YISAMCG | C.VNRGGI |
| tr C5EMR9 C5EMR9_9FIRM         | KL  | IKSVL | LALTT  | YISAMCG | C.VNRGGI |
| tr A0A2T4TB47 A0A2T4TB47_9FIRM | KL  | IKSVL | LALTT  | YISAMCG | C.VNRGGI |
| tr A0A1Y4R8Q8 A0A1Y4R8Q8_9FIRM | KL  | IKSVL | LALTT  | YISAMCG | C.VNRGGI |
| tr A0A1C5T2Z6 A0A1C5T2Z6_9FIRM | KL  | IKSVL | LALTT  | YISAMCG | C.VNRGGI |
| tr A0A1F7AV49 A0A1F7AV49_9BACT | KL  | IKSVL | LALTT  | YISAMCG | C.VNRGGI |
| tr A0A1V3L349 A0A1V3L349_9PAST | KL  | IKSVL | LALTT  | YISAMCG | C.VNRGGI |
| tr A0A1C5V1H8 A0A1C5V1H8_9BACE | KL  | IKSVL | LALTT  | YISAMCG | C.VNRGGI |
| tr U2P4S1 U2P4S1_9BACT         | KL  | IKSVL | LALTT  | YISAMCG | C.VNRGGI |
| tr S0FA62 S0FA62_9BACE         | KL  | IKSVL | LALTT  | YISAMCG | C.VNRGGI |
| tr A0A255SNC9 A0A255SNC9_9BACT | KL  | IKSVL | LALTT  | YISAMCG | C.VNRGGI |
| tr F9D2C0 F9D2C0_PREDD         | KL  | IKSVL | LALTT  | YISAMCG | C.VNRGGI |
| tr J9G1L2 J9G1L2_9ZZZZ         | KL  | IKSVL | LALTT  | YISAMCG | C.VNRGGI |
| tr A0A1V6HXD6 A0A1V6HXD6_9BACT | KL  | IKSVL | LALTT  | YISAMCG | C.VNRGGI |

tr|W4PHR0|W4PHR0\_9BACE  
sp|Q2RIL2|Y1414\_MOOTA  
tr|E3DR40|E3DR40\_HALPG  
tr|C7RDJ2|C7RDJ2\_ANAPD  
tr|D7N8J7|D7N8J7\_9FIRM  
tr|AOA101I867|AOA101I867\_9BACT  
tr|TOT8V8|TOT8V8\_9FIRM  
tr|AOA101HQH0|AOA101HQH0\_9BACT  
tr|AOA1M6M0R3|AOA1M6M0R3\_9FIRM  
tr|R5PQF5|R5PQF5\_9BACT  
tr|AOA0S7X2P6|AOA0S7X2P6\_9BACT  
tr|K1Z1W5|K1Z1W5\_9ZZZZ  
tr|AOA2N2Z618|AOA2N2Z618\_9BACT  
tr|AOA1M3CYU2|AOA1M3CYU2\_9BACT  
tr|S6A8J2|S6A8J2\_9SPIO  
tr|AOA1M4U177|AOA1M4U177\_9CLOT  
tr|TOPGZ2|TOPGZ2\_9CLOT  
tr|AOA1Q6NM25|AOA1Q6NM25\_9FIRM  
tr|AOA2T3KA22|AOA2T3KA22\_9GAMM  
tr|AOA101VYN5|AOA101VYN5\_9FIRM  
tr|AOA1T5IDD0|AOA1T5IDD0\_9CLOT  
tr|AOA1M6NZ58|AOA1M6NZ58\_9FIRM  
tr|AOA223ASF7|AOA223ASF7\_9FIRM  
tr|AOA2S6G0N4|AOA2S6G0N4\_9CLOT  
tr|AOA1H5VMB4|AOA1H5VMB4\_9CLOT  
tr|S3AAC6|S3AAC6\_9FIRM  
tr|AOA176K076|AOA176K076\_9BACT  
tr|AOA1M5TZM1|AOA1M5TZM1\_9BACT  
tr|AOA1H3EAS1|AOA1H3EAS1\_9BACT  
tr|E5YB10|E5YB10\_BILWA  
sp|A6LLR7|Y1007\_THEM4  
tr|R6LUT7|R6LUT7\_9FIRM  
tr|F2LVU2|F2LVU2\_HIPMA  
tr|AOA2N1SJ95|AOA2N1SJ95\_9SPIR  
tr|AOA1V5Q3C6|AOA1V5Q3C6\_9BACT  
tr|W4U114|W4U114\_CUTAC  
tr|AOA2X5DYA3|AOA2X5DYA3\_SALET  
tr|AOA0C2NJF9|AOA0C2NJF9\_9VIBR  
tr|G2SCC0|G2SCC0\_ENTAL  
tr|AOA1G6LDY3|AOA1G6LDY3\_9ACTN  
tr|AOA1C6LB18|AOA1C6LB18\_9CLOT  
tr|AOA150AAJ3|AOA150AAJ3\_9BACT  
tr|C5UWG8|C5UWG8\_CLOBO  
tr|IOGPL4|IOGPL4\_SELRL  
tr|FOYZ14|FOYZ14\_9CLOT  
tr|AOA0U5HFB9|AOA0U5HFB9\_9CLOT  
tr|AOA0G4K5Q4|AOA0G4K5Q4\_9SPIR  
tr|MLYXC3|MLYXC3\_9FIRM  
tr|AOA1Y4D3A3|AOA1Y4D3A3\_9BACT  
tr|T1DSV6|T1DSV6\_9PORP  
tr|R5K3Y4|R5K3Y4\_9BACE  
tr|AOA0A2FDZ8|AOA0A2FDZ8\_9PORP  
tr|AOA0E9LTM7|AOA0E9LTM7\_9BACT  
tr|AOA096CTK4|AOA096CTK4\_9BACT  
tr|AOA1T4LDG9|AOA1T4LDG9\_9PORP  
tr|U6RQI6|U6RQI6\_9BACE  
tr|AOA2T4TUJ1|AOA2T4TUJ1\_9BACT  
tr|AOA1V5EBL5|AOA1V5EBL5\_9DELTA  
tr|AOA174ES44|AOA174ES44\_9BACT  
tr|R5PXC6|R5PXC6\_9BACT  
tr|E1GXV0|E1GXV0\_9BACT  
tr|R6Y5C6|R6Y5C6\_9BACT  
tr|AOA1H5SVZ9|AOA1H5SVZ9\_9BACT  
tr|AOA2U0U4Y1|AOA2U0U4Y1\_9BACT  
tr|D1W896|D1W896\_9BACT  
tr|E6MQP7|E6MQP7\_9BACT  
tr|E4T7H0|E4T7H0\_PALPW  
tr|AOA133YX9|AOA133YX9\_9BACT  
tr|AOA0D8JEE4|AOA0D8JEE4\_9BACT  
tr|W4UV02|W4UV02\_9BACE  
tr|AOA161RAB3|AOA161RAB3\_9FIRM  
tr|AOA255T3U3|AOA255T3U3\_9BACT  
tr|AOA1C5RAF1|AOA1C5RAF1\_9FIRM  
tr|D9Y8N5|D9Y8N5\_9BURK  
tr|AOA2N4S738|AOA2N4S738\_9BACT  
tr|AOA16PR96|AOA16PR96\_9PORP  
tr|R5JFT9|R5JFT9\_9BACE  
tr|J9C487|J9C487\_9ZZZZ  
tr|AOA1M3FU28|AOA1M3FU28\_9BACT  
tr|AOA2R3MQS7|AOA2R3MQS7\_9BACE  
tr|AOA2T5BZ72|AOA2T5BZ72\_9BACT  
tr|F5IYA2|F5IYA2\_9BACT  
tr|AOA2T5BXU0|AOA2T5BXU0\_9BACT  
tr|AOA1V5I3Q4|AOA1V5I3Q4\_9BACT  
tr|AOA1M3FLX8|AOA1M3FLX8\_9BACT  
tr|AOA1Y4HPA5|AOA1Y4HPA5\_9BACT  
tr|AOA1M3MC81|AOA1M3MC81\_9BACT  
tr|AOA1Q3KTB1|AOA1Q3KTB1\_9BACT  
tr|F7KI60|F7KI60\_9FIRM  
tr|C2CGI7|C2CGI7\_9FIRM  
tr|AOA1V5P9J8|AOA1V5P9J8\_9FIRM  
tr|AOA2S7ZDJO|AOA2S7ZDJO\_9FIRM  
tr|AOA1W1VEG8|AOA1W1VEG8\_PEPAS  
tr|G5IEG1|G5IEG1\_9CLOT  
tr|U7VFT7|U7VFT7\_9FUSO  
tr|AOA2S4GQ19|AOA2S4GQ19\_9FIRM  
tr|R51577|R51577\_9BACT  
tr|AOA2M6ZWR1|AOA2M6ZWR1\_9CHLR  
tr|AOA1F0FV87|AOA1F0FV87\_9PORP  
tr|AOA2X1XJ55|AOA2X1XJ55\_PORCN  
tr|AOA1Q4P1Z1|AOA1Q4P1Z1\_SERMA  
tr|AOA2I4NZH5|AOA2I4NZH5\_CLOBO  
tr|R5SEH4|R5SEH4\_9BACE

.....EL...I...RALV...LSH...LT...V...I...Y...K...Q...SL...G...RLS...SAL...CG...CVV...AAT...GS...SC...GIT...W...LM...G...GD...  
.....SV...T...RALA...IAH...FT...N...MY...LK...A...YT...G...KLS...SPL...CG...AVT...GGA...GV...AAA...ICW...LLE...G...GSC...  
.....KL...L...RALA...LSN...LL...T...LY...IK...T...AT...G...SLS...AM...CG...VAV...AGV...GV...SAS...TY...LLG...G...GG...  
.....EL...E...RALI...FSN...L...IAL...Y...IK...N...KI...G...KLS...AY...CG...VVS...ASAAA...IAS...IAFIN...K...K...  
.....SL...Y...RALI...FAN...L...L...IG...LY...MK...Q...GI...G...KLS...AY...CG...VVS...AGV...GV...SAS...TY...LLG...G...GG...  
.....DI...I...RAVA...LSH...LFS...GY...IK...N...KL...G...MVAP...ICG...CVTA...AGT...GA...TAG...I...V...LLG...G...GT...  
.....EL...Y...RALV...FAN...LLT...LV...VK...S...GI...G...KLS...AY...CG...VVS...AGV...GV...SAS...TY...LLG...G...GT...  
.....DI...I...KAVA...ISH...LFS...GY...IK...K...KL...G...RVAP...ICG...CVTA...AGT...GA...TAG...I...V...LLG...G...GS...  
.....NM...Y...RALV...FAN...LVA...I...Y...IK...S...KI...G...SLS...AF...CG...AVS...AAT...AV...SGAI...TY...LLR...G...G...  
.....EL...I...RALT...LSH...LTA...I...Y...IK...Q...SL...G...KLS...AL...CG...CVV...ASI...GS...SCAI...TY...LLG...G...GD...  
.....KL...A...KAFA...LSH...LVT...LY...AS...K...HI...G...WLS...AL...CG...A...PTK...AGI...GA...TAG...I...TY...LLG...G...GIS...  
.....EL...A...RALT...LSH...LVA...I...HI...K...G...YL...G...KLS...AL...CG...CVIA...STGA...AAG...I...V...LLN...G...GS...  
.....EL...A...RALV...LSH...LIA...I...HI...K...G...YL...G...KLS...AL...CG...CVIA...STGA...SCG...I...V...LLR...K...G...GS...  
.....EL...A...RALV...LGH...LVA...I...HI...K...R...YL...G...KLS...AL...CG...CVIA...STGA...SCG...I...V...LLR...G...GN...  
.....KL...I...RSL...LSN...LLA...I...HI...K...T...GI...G...RLS...AY...CG...AVT...AGA...AC...AAV...TY...MK...G...G...  
.....QL...V...KALA...ISH...IT...TY...IK...Q...FT...G...RLS...SV...CG...CGVA...AGV...GA...ACG...I...CY...LLG...G...GK...  
.....TL...R...RAVF...LGH...VV...N...F...VK...K...YT...G...KLS...AT...CG...CAIA...AGI...GA...SV...GV...SW...LLG...G...GKD...  
.....KL...C...RSVL...VSN...LIA...I...HI...K...Y...YI...G...SLS...AY...CG...AVS...AAC...GA...GAG...TY...MY...G...G...  
.....QL...A...RALI...MSH...LGA...I...Y...MK...S...FY...P...PLS...PF...CG...CAV...TSS...AA...SMAM...TY...LQ...G...GS...  
.....TT...I...RAVA...LSCL...IS...Y...VK...S...SF...G...RLS...AL...CG...ATV...AAT...GA...SSG...I...V...LLG...G...GSL...  
.....RL...A...RSIA...LSFL...IT...TY...IK...E...YS...G...RLS...AF...CG...CAIA...AGT...GA...SVG...I...V...LLG...G...GNY...  
.....SM...I...RAVA...LSCL...IT...TY...IK...A...SF...G...RLS...AL...CG...ATV...AAT...GS...SCG...I...V...LLG...G...GNL...  
.....KL...I...RATA...LSY...LVT...CT...Y...IK...E...YS...G...KLS...AF...CG...CAIA...AGS...GM...ATAL...V...LDG...G...GDT...  
.....EL...A...RALA...LSN...LVT...I...HI...K...S...YI...G...RLS...AL...CG...AGIA...SIG...GS...SAAT...TY...LLG...G...GK...  
.....KL...A...RAIA...ISH...LIT...Y...HI...K...N...HL...G...RLS...SV...CG...CGVA...AGI...GA...SCG...IT...Y...LLG...G...GT...  
.....EL...Y...RALV...FAN...LLT...LV...VK...S...GI...G...KLS...AY...CG...VVS...AGI...VS...VAG...I...AFL...K...G...G...  
.....KV...S...KALI...LSH...LFG...V...FI...K...A...KL...G...RLT...PT...CG...AANA...AAPAA...AAG...I...TY...LLG...G...GS...  
.....LI...L...KATL...LSIF...VT...TY...IK...A...YT...G...LTP...TCG...AGIT...SAS...GS...AAG...L...TY...LK...G...GN...  
.....ET...A...KAVT...LSH...LTF...S...FI...K...S...RT...G...RLS...PT...CG...CTVA...AGA...GA...AAG...I...TY...LLS...QD...  
.....KL...A...EALA...LSH...LVC...GY...IK...A...YT...G...RLT...PT...CG...CAVA...AGA...GA...AAG...I...V...RL...HG...G...GT...  
.....KL...L...KATL...LSIL...VT...TY...IK...A...YT...G...LTP...TCG...AGSI...SSAG...GA...AAG...L...TY...LK...G...GN...  
.....QL...L...RALA...LSD...LIT...I...HI...K...T...GI...G...RLS...AY...CG...AIS...AGV...GA...GAG...I...CY...L...G...G...  
.....KT...T...KAVM...LSCF...IT...S...LT...IT...S...KF...G...FVS...ST...CG...VHHA...AAV...GV...IGG...IL...Y...L...K...NR...  
.....SL...F...HGAA...FGV...AL...I...AT...MK...E...KT...G...IIT...SL...CG...CSIT...SALA...A...SAL...AW...GM...G...GSE...  
.....RI...L...PAAL...LALL...LAG...I...HMT...A...KRT...G...RISE...ECG...L...GTK...ASPAL...AAG...LAY...ARG...ADC...  
.....RR...V...RAWP...SLTP...SP...ST...P...P...GF...P...CSP...L...SVL...RPQ...Q...WVR...RPQ...G...AWR...C...  
.....RL...A...RALM...LSH...LSA...I...Y...YS...S...SAF...R...VCR...RCA...RQP...RRR...G...SSAR...W...RG...  
.....TM...I...RALM...LSH...LMA...I...Y...IK...S...HQN...KLS...AL...CG...ATT...ASM...GA...VAG...MT...W...LLG...G...GQ...  
.....RL...A...RALM...LSH...LAA...I...Y...HI...K...Y...QL...P...RLS...AL...CG...ATT...AAM...GA...AAG...MA...W...LMD...GR...  
.....EL...Y...RAVV...LSD...LTAV...HV...K...Y...FI...G...ELS...AF...CG...AVS...ASC...GA...GAG...I...CM...LR...G...G...  
.....KL...L...RALV...LSN...LVT...I...HI...K...T...GI...G...TLS...AY...CG...AVS...AGCS...GAG...I...AY...L...G...G...  
.....EM...Y...RALM...VSH...LST...V...HI...K...T...NV...G...RLS...AY...CG...VMT...ASA...AV...SGAL...V...YLD...G...G...  
.....KL...Y...RSLI...VSN...LIT...I...HI...K...T...GI...G...RLS...AF...CG...AVS...AGCG...GA...GAG...I...AY...L...G...G...  
.....KL...Y...RALL...LAN...LVT...I...HI...K...E...GI...G...RLS...AY...CG...AVS...AGAG...GA...GAG...I...AW...L...C...S...  
.....KL...F...RALA...LSN...LVA...I...HI...K...T...GI...G...RLS...AY...CG...AVS...AGAAA...GAG...I...AY...L...G...G...  
.....KM...Y...RALA...LSN...LAA...I...HI...K...T...PI...G...RLS...AY...CG...AVN...AGA...GA...GAG...I...AY...L...C...D...  
.....KL...Y...RALV...LSN...LIA...L...HI...K...K...HI...G...KLS...AF...CG...VVC...AAT...GS...ASA...I...AY...LH...D...  
.....KL...Y...RALV...LSN...LVS...I...Y...IK...S...KI...G...ELS...AF...CG...TVS...AAC...GS...GAG...I...F...LH...G...  
.....QL...I...RALM...LSH...LMV...I...Y...IK...Q...SL...G...RLS...AL...CG...CVV...AAT...GA...SCG...IT...W...LMG...G...GN...  
.....KT...I...RALM...LSN...LMV...V...Y...IK...Q...KL...G...RLS...AL...CG...CVV...AAT...GS...ACG...IT...Y...LMG...G...GS...  
xxseel...I...RALM...LSH...LTV...I...Y...IK...Q...SL...G...RLS...AL...CG...CVV...AAT...GS...SCG...IT...W...LMG...G...GT...  
.....RT...Y...RALV...LSN...LMV...I...Y...IK...Q...KL...G...RLS...AL...CG...CVV...AAT...GS...SCGL...TY...LMG...G...GT...  
.....QL...V...RALA...LSN...LMV...I...Y...IK...R...GL...G...RLS...GL...CG...VTV...AGI...GA...SCGM...TY...LMG...G...GT...  
.....EL...Y...RALT...LSH...LTA...I...Y...IK...Q...NL...G...TSL...AL...CG...CIV...AST...GS...SCG...IT...Y...LMG...G...GD...  
.....ET...V...RALV...LSN...LMV...I...Y...IK...Q...KL...G...RLS...AL...CG...CVV...AAT...GS...SCGL...TY...LMG...G...GT...  
.....EL...I...RALV...LSH...LTV...I...Y...IK...Q...SL...G...RLS...AL...CG...CVV...AAT...GS...SCG...IT...Y...LMG...G...GN...  
.....EL...I...RALT...LSH...LTA...I...Y...IK...Q...SL...G...VLS...AL...CG...CVV...ASI...GS...SCG...IT...Y...LMG...G...GD...  
.....QL...L...RALV...LSY...LTV...I...Y...IK...T...FT...G...VLS...PT...CG...CGVA...AAV...GA...GCG...I...F...LLG...G...GE...  
.....QL...I...RALM...LSH...LMV...I...Y...IK...Q...SL...G...RLS...AL...CG...CVV...AAT...GA...SCAI...TY...LMG...G...GN...  
.....EL...I...RALT...LSH...LTA...I...Y...IK...Q...SL...G...KLS...AV...CG...CVV...ASI...GS...SCG...IT...Y...LMG...G...GD...  
.....EL...I...RALT...LSH...LTV...I...Y...IK...Q...SL...G...RLS...AL...CG...CVV...SSI...GS...SCG...IT...Y...LMG...G...GD...  
.....QL...I...RALM...LSH...LMV...I...Y...IK...Q...SL...G...RLS...AL...CG...CVV...AAT...GA...SCG...IT...Y...LMG...G...GD...  
.....QL...I...RSLM...LSH...LMV...I...Y...IK...Q...SL...G...RLS...AL...CG...CVV...AAT...GA...SCG...IT...W...LMG...G...GS...  
.....EL...I...RALT...LSH...LTA...I...Y...IK...Q...SL...G...KLS...AL...CG...CVV...ASI...GS...SCG...IT...Y...LMG...G...GD...  
.....EL...I...RALT...LSH...LSA...I...Y...IK...Q...SL...G...KLS...AL...CG...CVV...ASI...GS...SCG...IT...Y...LMG...G...GT...  
.....EL...I...RALT...LSH...LTA...I...Y...IK...Q...SL...G...KLS...AL...CG...CVV...ASI...GS...SCG...IT...Y...LMG...G...GT...  
.....EL...I...HALA...LSH...LMT...I...Y...IK...Q...SL...G...RLS...GL...CG...AIV...AAT...GS...ACG...IT...Y...LMG...G...GT...  
.....EL...I...RALV...LSH...LTA...I...Y...IK...Q...SL...G...KLS...AL...CG...CVV...ASI...GS...SCG...IT...Y...LMG...G...GT...  
.....QL...I...RALT...LSH...LMV...I...Y...IK...R...GL...G...RLS...GL...CG...VTV...AGI...GA...ACG...IT...Y...LMG...G...GT...  
.....EL...I...RALM...LSH...LTV...I...Y...IK...Q...SL...G...RLS...AL...CG...CVV...AAT...GS...SCG...IT...W...LMG...G...GT...  
.....SF...L...RALA...LSFL...IT...LY...IK...S...HI...G...RLS...AL...CG...CAVA...SCMG...GS...GAG...I...AY...LMN...LGE...  
.....EL...V...RALT...LSH...LTA...I...Y...IK...Q...SL...G...KLS...AL...CG...CVV...ASI...GS...SCG...IT...Y...LMG...G...GD...  
.....TL...Y...RALV...LAN...LVS...I...Y...IK...V...FI...G...KLS...AY...CG...AVS...AAGA...VSG...I...AW...LD...G...G...  
.....QM...Y...RALT...LSH...LTS...V...Y...IK...Q...SL...G...RLS...AL...CG...CVV...AST...GA...STA...IT...W...LMG...G...G...  
.....QL...V...RALV...LSN...LTM...I...Y...IK...Q...YL...G...RLS...AL...CG...CVV...AST...GA...CCG...I...AW...LMG...G...GS...  
.....QL...I...RALT...LSH...LTA...I...Y...IK...Q...QL...G...RLS...AL...CG...CVV...AST...GS...SCG...IT...Y...LMG...G...GN...  
.....EL...I...RALM...LSH...LTV...I...Y...IK...Q...SL...G...RLS...AL...CG...CVV...AAT...GS...SCG...IT...W...LMG...G...GN...  
.....EL...I...RALM...LSH...LTV...I...Y...IK...Q...QL...G...RLS...AL...CG...CVV...AST...GS...SCG...IT...Y...LMG...G...GN...  
.....EI...I...RALM...LSH...LTV...I...Y...IK...Q...QL...G...RLS...AL...CG...CVV...AST...GS...SCG...IT...Y...LMG...G...GS...  
.....DL...V...RALA...LSH...LMV...I...Y...IK...R...RL...G...RLS...AL...CG...VTV...AGI...GA...ACG...IT...H...LMG...G...GN...  
.....EL...V...RALI...LSH...LTV...I...Y...IK...Q...KL...G...RLS...AL...CG...CVA...AAT...GA...SCG...IT...H...LMG...G...GD...  
.....DL...V...RALV...LSH...LMV...I...Y...IK...R...RL...G...RLS...AL...CG...VTV...AGI...GA...ACG...IT...H...LMG...G...GN...  
.....EM...L...RAIA...LSY...LLT...I...Y...IK...S...RI...G...RLS...AT...CAIA...AGI...GV...AAGA...SM...LLG...G...GDL...  
.....EL...I...RALV...LSN...LMA...I...Y...IK...Q...HI...G...RLS...AL...CG...CVV...AST...GA...SCG...IT...Y...LMG...G...GS...  
.....EL...I...RALM...LSH...LTV...I...Y...IK...Q...SL...G...RLS...AL...CG...CVV...AAT...GS...SCG...IT...W...LMG...G...GD...  
.....EL...I...RALT...LSH...LMT...I...Y...IK...Q...SL...G...RLS...GL...CG...AIV...AAT...GS...SCG...IT...Y...LMG...G...GS...  
.....EL...I...RALA...LSN...LMT...I...Y...IK...Q...SL...G...RLS...GL...CG...AIV...ATT...GS...ACG...IT...Y...LMG...G...GT...  
.....KL...I...RAVI...VSD...LVA...I...Y...IK...K...GI...G...KLS...AF...CG...ALC...AGI...GA...ACG...I...SYLT...G...G...  
.....DL...Y...RALI...FSN...L...IAL...Y...IK...N...EI...G...KLS...AY...CG...VVS...ASAAV...ISS...IAFIN...K...K...  
.....RE...L...RAIA...LAA...L...N...IF...G...K...S...YI...G...ALS...AT...CAIA...SGL...GA...SIG...I...CY...LLG...G...G...  
.....EL...Y...RVLV...FAN...LLT...LV...VK...T...GI...G...KLS...AY...CG...VVA...AGV...VS...VAG...I...AFL...K...G...G...  
.....EL...Y...RALV...FAN...LIG...LY...IK...Q...GI...G...KLS...AY...CG...VVS...AAS...AS...VCG...I...GY...LN...N...  
.....Y...A...LRATA...LSY...LVC...MY...IK...E...YS...G...KLS...AF...CG...CAIA...AGT...GM...ACGL...W...LLR...G...GSV...  
.....QL...I...RGLF...FSL...HT...I...HI...K...S...NV...G...RLS...AY...CG...VVC...AGGV...AGAL...F...LD...G...G...  
.....AL...H...RAMI...FAN...LST...I...Y...IK...R...GI...G...KLS...AY...CG...AVN...AGCAA...VCG...I...AY...LD...G...G...  
.....QL...I...RALT...LSH...LTA...I...Y...IK...G...YL...G...KLS...AL...CG...CVA...STGS...ACG...I...V...W...LSG...G...GT...  
.....RL...L...KSIL...LSH...I...V...TR...IIS...N...YT...G...DLS...AL...CG...C...FNK...SAI...GA...AAG...L...TY...LLG...G...GKE...  
.....KR...I...RALM...LSN...LMV...I...Y...IK...Q...KL...G...RLS...AL...CG...CVV...AST...GS...ACG...IT...Y...LMG...G...GT...  
.....QK...I...RALM...LSN...LMV...I...Y...IK...Q...KL...G...RLS...AL...CG...CVV...AST...GS...ACG...IT...Y...LMG...G...GS...  
.....EL...V...RAVT...LSH...LVA...I...ST...H...S...RYA...RLS...AL...CA...AST...AAM...GA...AAG...MA...W...LLS...KD...  
.....RL...Q...RAVF...FGH...AVN...N...F...G...K...YT...G...KLS...AT...CG...CAIA...AGI...GA...TAG...I...AW...LLG...G...GKD...  
.....KL...A...RALI...LSN...LVA...I...HI...K...G...YL...G...RLS...AL...CG...CVV...A...STGS...SCG...I...V...W...LLG...G...GS...



tr|A0A1M5S8F6|A0A1M5S8F6\_9CLOT . . . . . R|L . Y|RAIF . L|GHAVNNFVK . . . . . K . . . . . YTG . . . . . KLSAMCG . . CA|IA . AG|GA . GAA|ITWMLG . GTD .  
tr|R7EVQ5|R7EVQ5\_9BACT . . . . . HT . . L|RALA . LSNLVSIIYIK . . . . . Q . . . . . GLG . . . . . RLSALCG . . CVV . . AGTGA . SSGIAYLMG . AD . .  
tr|A0A2N5Z193|A0A2N5Z193\_9BACT . . . . . LI . . L|RATA . LSLCLITGFIK . . . . . E . . . . . RLG . . . . . KLSPICG . . CVA . . SSGS . GAA|ITFING . H . P .  
tr|A0A259UN51|A0A259UN51\_9FIRM . . . . . QL . . L|RATA . LSYLICMYIK . . . . . E . . . . . YSG . . . . . RLSAFCG . . CA|IA . AGSGM . ACAL|YLRG . GTV .  
tr|C3JBP9|C3JBP9\_POREA . . . . . OT . . I|RALV . LSNLMVIYVK . . . . . Q . . . . . KLK . . . . . RLSALCG . . CVV . . AATGS . SCGLYLMG . GS .  
tr|C3WG74|C3WG74\_FUSMR . . . . . DM . . I|RGLF . FSHMTIHIK . . . . . S . . . . . NIG . . . . . RLSAYCG . . AIC . . ASAGV . AGAISFLS . G . .  
tr|A0A0U9HF52|A0A0U9HF52\_9THEO . . . . . KL . . V|RSIL . LSYLVTMYIK . . . . . T . . . . . FAG . . . . . RLSAFCG . . CA|IA . AGTGS . SAGICCLLG . GNN .  
tr|R5KGZ4|R5KGZ4\_9BACT . . . . . ET . . I|RALI . LSNLTAIYIK . . . . . Q . . . . . HLG . . . . . SLSALCG . . CVV . . ASTGS . SCGITYLMG . GS .  
tr|U2SF48|U2SF48\_9FIRM . . . . . RT . . F|RAVT . LSNLMAIHIK . . . . . A . . . . . DFG . . . . . PLSGLCG . . ATI . . AAAAA . ACGLVYLG . GTL .  
tr|A0A1K1LIF7|A0A1K1LIF7\_9DELT . . . . . EL . . A|RALM . MSHLTSIHIK . . . . . H . . . . . HLG . . . . . RLSAHCG . . AMV . . AATAA . CGCIALLG . GD .  
tr|A0A134AK51|A0A134AK51\_9FIRM . . . . . KL . . I|RATA . LSYLICMYIK . . . . . E . . . . . YSG . . . . . RLSAFCG . . CA|IA . AGTGM . ACGLAYLRD . GNL .  
tr|A0A0M1IUF1|A0A0M1IUF1\_9CLOT . . . . . TL . . A|RSIA . LSYIINIYIK . . . . . E . . . . . FSG . . . . . KLSAFCG . . CA|IA . AGTGV . SAGICYLLG . GES .  
tr|C0C5L4|C0C5L4\_9FIRM . . . . . IL . . L|RATA . LSYLITMYIK . . . . . E . . . . . YSG . . . . . KLSAFCG . . CG|IA . AGTGM . ACGLAFMRN . ASE .  
tr|F3ZP77|F3ZP77\_9BACE . . . . . DL . . A|RALI . LSHLTAIYIK . . . . . Q . . . . . SLG . . . . . RLSALCG . . CVV . . SGTGS . SCGITYLMG . GG .  
tr|A0A098BXJ4|A0A098BXJ4\_9PORP . . . . . QL . . I|RALI . LSNLSMIYIK . . . . . Q . . . . . HIG . . . . . RLSALCG . . CVV . . ASTGS . SCGITYLMG . GN .  
tr|A0A1C7ID61|A0A1C7ID61\_9FIRM . . . . . TT . . L|RAVA . LSLCLITHVK . . . . . Q . . . . . YIG . . . . . KLSPLCG . . CGTG . SAI . GS . ACAL|TWLGS . GH .  
sp|C5CEY4|Y595\_KOSOT . . . . . EI . . A|KAIA . LSHLVLGYIK . . . . . S . . . . . RLK . . . . . KVTPTCG . . AANA . AGPAA . AAGIYVLMN . GS .  
tr|B9DZB9|B9DZB9\_CLOK1 . . . . . KL . . I|RALA . LSNLMAIHIK . . . . . S . . . . . NLG . . . . . RLSALCG . . CVVA . . STGA . CCGITYIFG . GK .  
tr|A0A1W1XRL1|A0A1W1XRL1\_9CLOT . . . . . TL . . I|RALA . LSNLVAIHIK . . . . . S . . . . . NLG . . . . . RLSALCG . . CVVA . . STGA . CTGITYILG . GK .  
tr|R5AJ55|R5AJ55\_9FIRM . . . . . EI . . I|RGVA . LSLCLITIFS . . . . . H . . . . . YTG . . . . . RLSALCG . . CVL . . GGS . GAA|ITVLMG . GGA .  
tr|N1JU37|N1JU37\_9BACT . . . . . DI . . A|KAIA . LSNLHFSGYIK . . . . . N . . . . . KLK . . . . . RVAPICG . . CVTA . AGTGA . AAGITYLLG . GA .  
tr|A0A0G2Z8T6|A0A0G2Z8T6\_9BACT . . . . . KI . . S|KAII . LSHLTFVGYIK . . . . . G . . . . . KLK . . . . . RLTPICG . . ATNA . AAPAA . AAGITYLLG . GS .  
tr|K2Q853|K2Q853\_9BACT . . . . . KL . . I|RATA . LSLILVTIYIK . . . . . A . . . . . YTG . . . . . RLTPICG . . AGST . SAAGS . AAGLTYINN . GN .  
tr|H2J3N8|H2J3N8\_MARPK . . . . . KV . . L|KAIL . LSNLMTIYIK . . . . . A . . . . . YTG . . . . . VLTPTICG . . AGSI . APAGA . AAGIYVLYG . GN .  
tr|A0A0H2ST44|A0A0H2ST44\_9BACT . . . . . KM . . K|KALL . LSNLITTIYIK . . . . . S . . . . . YTG . . . . . VLTPTICG . . AGSV . ASAGV . AAGIYVLYG . GT .  
tr|A0A1V6A0Z4|A0A1V6A0Z4\_9BACT . . . . . EL . . A|EALA . LSHLVTGFIK . . . . . A . . . . . HTG . . . . . RLTPVCG . . CA|IA . AGAGA . AALVRLGG . GT .  
tr|S7T1X0|S7T1X0\_9DELT . . . . . EL . . A|EALA . LSHLVTGAVK . . . . . V . . . . . KTG . . . . . RLTPVCG . . CAVA . AGSGA . AALVRLAG . GD .  
tr|G7V7I3|G7V7I3\_THELD . . . . . SL . . A|EALA . LSHMVTSAIK . . . . . A . . . . . HTG . . . . . RLTPICG . . CAVA . AGSGA . AALVRLCG . GT .  
tr|A0A1F9QEB7|A0A1F9QEB7\_9BACT . . . . . RI . . L|RSIA . LSHLNVSYIK . . . . . V . . . . . FTG . . . . . ELAPICG . . CAVA . AGVGA . SVAIYWQRS . GA .  
tr|A0A1F9T7I4|A0A1F9T7I4\_9BACT . . . . . RI . . L|KSIA . LSHLVNSYIK . . . . . V . . . . . FTG . . . . . ELAPICG . . CAVA . AGVGA . SVAIYWQRS . GP .  
tr|A0A1X7E876|A0A1X7E876\_9DELT . . . . . EL . . A|EALA . LSHLVTGAVK . . . . . A . . . . . KTG . . . . . RLTPVCG . . CS|IA . AGAGA . AALVRLAK . GT .  
tr|S7U3L9|S7U3L9\_9DELT . . . . . EL . . A|EALA . LSHLVTGAIK . . . . . A . . . . . RTG . . . . . RLTPICG . . CAVA . AGAGA . AALVRLAG . GS .  
sp|A7HMJ2|Y1278\_FERNB . . . . . KI . . E|KAVL . LSLILVTIYIK . . . . . A . . . . . FTG . . . . . VLTPTICG . . AGSI . ASAGS . SAAITYLAG . GN .  
tr|A0A1V5I1I1|A0A1V5I1I1\_9BACT . . . . . ET . . A|KAIA . FSHLTSYVYK . . . . . S . . . . . RTG . . . . . RLTPICG . . CSVA . AGAGA . AAMVYLYKT . KD .  
tr|A0A1L7BFJ2|A0A1L7BFJ2\_9BACT . . . . . KL . . L|KATL . LSLILVTIYIK . . . . . A . . . . . YTG . . . . . RLTPICG . . AGTI . SAAGA . AAGLTYINN . GN .  
tr|A0A1E5HX95|A0A1E5HX95\_9FIRM . . . . . EI . . F|KATM . LAHLVNGHYAK . . . . . I . . . . . YVG . . . . . RLSALCG . . LFYA . AAPGV . LAALLYL . A . GKA .  
tr|E2NRI0|E2NRI0\_CATMR . . . . . KK . . L|KALA . LTHLVNRYIN . . . . . A . . . . . HIG . . . . . KLSPMCT . . CVMA . SSTSA . SVGIAYLLD . AT .  
tr|I8RL19|I8RL19\_9FIRM . . . . . RL . . A|RAIA . ISLGITIYIK . . . . . V . . . . . RTD . . . . . HLPALFG . . RPVA . AVSGA . SAAITWLMN . GD .  
tr|A0A2IOFCX5|A0A2IOFCX5\_9GAMM . . . . . QL . . A|RALI . LSHLGAIYIK . . . . . Q . . . . . HYP . . . . . PLSAFCG . . NTV . TSASA . AMAMVYLAG . GN .  
tr|U2CTP5|U2CTP5\_9CLOT . . . . . DG . . Y|RAVA . FGLLVNTYIK . . . . . Y . . . . . LSK . EYV . YMPPTCS . CAAT . SAPAS . AAGVAFHKG . LS .  
tr|A0A1Q6KJL3|A0A1Q6KJL3\_9FIRM . . . . . DG . . Y|RAVA . FALLMNTFMK . . . . . Y . . . . . ASK . EYV . YMPPTCS . CATT . AAPAA . AAGVAFHKG . LT .  
tr|A0A1V6JAV4|A0A1V6JAV4\_9BACT . . . . . AI . . L|PAVV . FTLLAQVYLT . . . . . A . . . . . KHK . . . . . RLSAECG . . I . ATK . AAPAL . AAGLAFARG . AGP .  
UniRef100\_A0A174CRQ0 . . . . . LL . . Y|RGLV . FSNLMTIHIK . . . . . T . . . . . GIG . . . . . RLSAFCG . . AVS . AGCAS . GAAITYLE . G .  
UniRef100\_A0A174N3S7 . . . . . VL . . Y|RALV . FSNLLTVYQK . . . . . Q . . . . . YIG . . . . . KLSAFCG . . AVS . ASCAA . GAAITYMG . G .  
UniRef100\_A0A1H7BL91 . . . . . KL . . Y|RGLV . LANLLTIHIK . . . . . T . . . . . LIG . . . . . RLSAFCG . . GVS . ASCSS . GAAITYLA . G .  
UniRef100\_A0A1H8XEWA . . . . . RL . . Y|RGLV . LSNLLTIHIK . . . . . T . . . . . SIG . . . . . RLSAFCG . . AVS . AACSS . GAAITYLA . G .  
UniRef100\_A0A1M6HFG6 . . . . . KL . . Y|RALV . VSNLVSIIHIK . . . . . S . . . . . KIG . . . . . KLSAYCG . . AVS . AACSS . GAAITYLH . G .  
UniRef100\_A0A1S9CDUH . . . . . QL . . Y|RGLA . FANLMTIYQK . . . . . T . . . . . FIG . . . . . RLSAFCG . . AVS . ASCAS . GSAMTYLA . N .  
UniRef100\_A0A1V2LVJ5 . . . . . QL . . Y|RALV . FANLMTIHIK . . . . . S . . . . . LIG . . . . . RLSAFCG . . AVN . AACAS . GAAITYLC . G .  
UniRef100\_A0A1W2DLF5 . . . . . KL . . Y|RGLL . FSNLLTIHIK . . . . . T . . . . . LIG . . . . . RLSAFCG . . AVS . ASCSS . GAAITYLE . G .  
UniRef100\_A0A2V3XXD9 . . . . . KL . . V|RALV . FSNLLTIHIK . . . . . T . . . . . GIG . . . . . RLSAYCG . . AVS . AACGA . GAGITYLS . G .  
UniRef100\_A0A316LX84 . . . . . KL . . I|RALV . LSNLIAIHEK . . . . . M . . . . . AVG . . . . . RLSAYCG . . AVS . AACGS . GAAITYLH . N .  
UniRef100\_A0A353LWZ7 . . . . . TL . . F|RALC . VSNLIAIHIK . . . . . T . . . . . SIG . . . . . LLSAYCG . . AVS . AACGS . GAGITYML . G .  
UniRef100\_A0A356BVF5 . . . . . KL . . F|RALC . VSNLVAIHIK . . . . . T . . . . . GIG . . . . . RLSAYCG . . AVS . AACGS . GAAITYML . G .  
UniRef100\_A0A359AUT6 . . . . . EL . . I|RALI . LSNLTTIYIK . . . . . Q . . . . . KVG . . . . . RLSGLCG . . AVY . ASVGA . ACAITYLMG . GN .  
UniRef100\_A0A395YNH5 . . . . . VL . . Y|RALV . FSNLLTIYQK . . . . . T . . . . . YIG . . . . . KLSAFCG . . AVS . ASCAS . GAAITYMV . G .  
UniRef100\_A0A402BP96 . . . . . SL . . Y|RGLV . FSNLLNHIK . . . . . T . . . . . FIG . . . . . RLSAFCG . . AVS . AACAS . GAAITYLA . G .  
UniRef100\_A0A413LQ61 . . . . . KL . . V|RALV . FSNLLTIHIK . . . . . T . . . . . GIG . . . . . RLSAYCG . . AVS . AACGA . GAGITYLL . S .  
UniRef100\_A0A416BC47 . . . . . VL . . Y|RALV . FSNLLTVYQK . . . . . Q . . . . . YIG . . . . . KLSAFCG . . AVS . ASCAA . GAGITYMV . G .  
UniRef100\_A0A5B9YBV7 . . . . . KL . . Y|RALV . FSNLLTIHIK . . . . . T . . . . . FIG . . . . . RLSAFCG . . AVS . ASCAS . GAAITYLE . R .  
UniRef100\_G8QTP6 . . . . . KL . . I|RALA . LSNLIAIHIK . . . . . S . . . . . FIG . . . . . RLSAYCG . . AVT . AASGA . GAAITWLF . G .  
UniRef100\_L1Q747 . . . . . KL . . Y|RGLV . FSNLLTIHIK . . . . . T . . . . . GIG . . . . . RLSAFCG . . AVS . AGCAS . GATITYLD . G .  
UniRef100\_N9XUA2 . . . . . QL . . Y|RGLV . FSNLMTIHIK . . . . . T . . . . . GIG . . . . . RLSAFCG . . AVS . AGCAS . GAAITYLK . G .  
UniRef100\_R6G079 . . . . . LL . . Y|RALV . FANLINIHIK . . . . . A . . . . . GIG . . . . . RLSAFCG . . AVT . SGCAS . GAGITYLE . G .  
UniRef100\_S3L3U3 . . . . . RL . . L|RGLL . VSNLVAIHIK . . . . . T . . . . . RIG . . . . . RLSAYCG . . AVS . AACGS . GAAITYLA . G .  
UniRef100\_S3LBC8 . . . . . KL . . L|RGLL . VSNLIAIHIK . . . . . T . . . . . RIG . . . . . RLSAYCG . . AVS . AGCGS . GAGITYLS . D .  
UniRef100\_UP10003123980 . . . . . RM . . F|QALA . LSNLITVHLK . . . . . T . . . . . GIG . . . . . RLSAYCG . . AVS . AACGA . FSAITWLA . G .  
UniRef100\_UP100059A8ADD . . . . . QL . . Y|RGLV . FSNLVTIHIK . . . . . T . . . . . GIG . . . . . RLSAFCG . . AVC . AGCAS . GAGITYLS . R .  
UniRef100\_UP10006D86209 . . . . . KI . . Y|RALV . FSDLITIHIK . . . . . T . . . . . FIG . . . . . RLSAFCG . . AIS . ASCAS . GAAITYLE . G .  
UniRef100\_UP10006DC3002 . . . . . QL . . Y|RGLV . FSNLMTIHIK . . . . . Q . . . . . GIG . . . . . RLSAFCG . . AVS . AGCAS . GAAITYLE . G .  
UniRef100\_UP1000930BB27 . . . . . KL . . Y|RALC . LSNLISLYIK . . . . . T . . . . . GVG . . . . . KLSAYCG . . AVS . AASAC . GAGIAYLMQ . G .  
UniRef100\_UP1000C7D41A5 . . . . . IL . . Y|RALV . FSNLLTVYQK . . . . . T . . . . . YIG . . . . . KLSAFCG . . AVS . ASCAS . GAAITYMV . G .  
UniRef100\_UP10010671517 . . . . . QL . . C|RALV . VSNLVAIHIK . . . . . Y . . . . . KVG . . . . . RLSAFCG . . VVS . AGAAA . AGIAFLQ . G .  
UniRef100\_UP10012B2C99E . . . . . KL . . I|RALA . LSNLLAIHIK . . . . . T . . . . . LIG . . . . . RLSAYCG . . VVC . AACGS . GAAITWLD . G .  
UniRef100\_A0A017RVN8 . . . . . EL . . A|KALA . ISHITTIYIK . . . . . Q . . . . . YTG . . . . . RLSAICG . . CGVA . AATGA . AVAICYLLG . GW .  
UniRef100\_A0A034T1R7 . . . . . QL . . A|RALM . LSHLTAIYIH . . . . . S . . . . . KLK . . . . . TLSALCA . A . TT . AAMGA . AAGIAWLLD . GR .  
UniRef100\_A0A037Z1V7 . . . . . KI . . I|RAVA . LSHLVTIYIK . . . . . S . . . . . YTG . . . . . PLSPVCG . . CGVA . AGVGA . SAGLSYALN . GN .  
UniRef100\_A0A064DLW3 . . . . . KL . . A|RALM . LSHLSAIYIH . . . . . H . . . . . QLP . . . . . RLSALCA . A . TT . AAMGA . AAGMAWIVD . GR .  
UniRef100\_A0A069RM78 . . . . . RL . . A|KALA . ISHLVISYVK . . . . . N . . . . . YTG . . . . . RLSAVCG . . CGVA . ASVGS . AAAITWLMG . LGY .  
UniRef100\_A0A073ITX9 . . . . . ET . . A|KAIA . VSHIATSEVK . . . . . H . . . . . NLG . . . . . RLSPLCG . . CAVA . AGAGA . AAGMTYLLG . GD .  
UniRef100\_A0A075KFF0 . . . . . TL . . T|RALI . LSHMMAIYIH . . . . . D . . . . . KLK . . . . . KLSALCA . V . TT . ASMGS . AAGMAWLLK . GD .  
UniRef100\_A0A076LH42 . . . . . KL . . I|KSIT . LSLAATTIYSA . . . . . Y . . . . . HSS . . . . . YISAMCG . . C . VNRGIGV . VSCLSYIFG . GS .  
UniRef100\_A0A081BZ02 . . . . . TL . . A|RALM . LSHFITIHLR . . . . . Q . . . . . HFD . . . . . RLSAMCG . . A . VA . AGTGA . AGIAAYLLG . GT .  
UniRef100\_A0A081C875 . . . . . RV . . I|KSIA . FSHLLNSYVK . . . . . C . . . . . YTG . . . . . DLSPVCG . . CA|IA . AGVGA . AAAIVYQQA . GK .  
UniRef100\_A0A085ABB7 . . . . . KL . . A|RALM . LSHLCAIYIH . . . . . F . . . . . QLP . . . . . RLSALCA . V . TT . ASMGA . AAGMAWIVD . GR .  
UniRef100\_A0A085HE69 . . . . . RL . . A|RALM . LSHLSAIYIH . . . . . Y . . . . . QLP . . . . . KLSALCA . A . TT . AAMGA . AAGMTWIVD . GD .  
UniRef100\_A0A086YYH2 . . . . . QR . . I|RALA . MSHLIAIYIH . . . . . S . . . . . FLK . . . . . ILGPFCA . T . DS . ASMGA . AAAVYVLMG . ED .  
UniRef100\_A0A089Q193 . . . . . QL . . T|RALI . LSHLTAIYIH . . . . . H . . . . . QLP . . . . . TLSALCA . A . TT . AAMGA . AAGMLWLLD . GS .  
UniRef100\_A0A090JPN8 . . . . . RL . . Y|RALI . FANLLGLYMK . . . . . E . . . . . GIG . . . . . KLSAYCG . . V . VS . AASAS . VCGIAMLK . G .  
UniRef100\_A0A094JMB3 . . . . . QL . . I|RALM . LSHLLAIYIK . . . . . H . . . . . HOH . . . . . KLSALCA . V . TT . AAMGS . AGIAYLLG . GS .  
UniRef100\_A0A096AJM6 . . . . . RT . . V|RALV . LANMLLAIYIK . . . . . S . . . . . GIG . . . . . RLSAYCG . . V . VS . SSSAT . VAAITWLL . G .  
UniRef100\_A0A096KME8 . . . . . RL . . Y|RALV . LSLDIAVHIK . . . . . S . . . . . YIG . . . . . ALSAFCA . A . IC . AACGA . GAAITWLLC . G .  
UniRef100\_A0A098F5F2 . . . . . QM . . I|RAVA . LSHLVTIHIK . . . . . S . . . . . KFG . . . . . RLSALCG . . V . TA . AGMGA . SAAIVYLLG . GSL .  
UniRef100\_A0A0A2E6A5 . . . . . VT . . T|RALM . MSLLMVYVVK . . . . . Q . . . . . LLG . . . . . RLSCLCG . . M . VV . SGI . GS . AAAIVYIMG . GS .  
UniRef100\_A0A0A2Y2Q1 . . . . . QR . . T|RALF . LSHLIAIFIH . . . . . S . . . . . KLK . . . . . KLSALCA . V . TT . AAMGS . CAGISYLLT . NK .  
UniRef100\_A0A0A3AP03 . . . . . KL . . A|RALF . LSHLMAIFIH . . . . . S . . . . . KLK . . . . . KLSALCA . V . TT . ASMGS . CAGIAWLLT . GK .  
UniRef100\_A0A0B0BT87 . . . . . KK . . I|RALI . LSNLTVIYIK . . . . . Q . . . . . SLG . . . . . RLSALCG . . CV . VV . AATGS . SCGITYLMG . GG .  
UniRef100\_A0A0B7MGZ7 . . . . . RE . . L|RGLL . YSNLLTIYAK . . . . . E . . . . . FIG . . . . . RLGSACG . . AAIC . AGVGV . AAATWMLG . GTD .  
UniRef100\_A0A0C1U077 . . . . . VL . . V|RALA . MSHLITIIYIK . . . . . S . . . . . HLG . . . . . RLSALCG . . CGVG . AAI . GA . SSAMTYLMG . GK .  
UniRef100\_A0A0D2HQ4 . . . . . EI . . L|KAIG . FSHLITAYVK . . . . . T . . . . . HTG . . . . . RLSAVCG . . CS|IA . AGAGA . AAGVAYLLG . GD .  
UniRef100\_A0A0D8IFV9 . . . . . RL . . A|KALA . MSHIINSYIK . . . . . S . . . . . YIG . . . . . RLSALCG . . CGVA . AGTGA . GVAIAWMLG . GEI .  
UniRef100\_A0A0E2E9E9 . . . . . KL . . I|RCLI . VSNLLAIHIK . . . . . T . . . . . GIG . . . . . RLSAYCG . . A . VT . AGAAC . AAAITYMK . G .  
UniRef100\_A0A0F0C990 . . . . . KL . . Y|RALV . LSNLLGIHIK . . . . . T . . . . . PI . . . . . RLSAYCG . . A . IN . AGAAA . GCGIAYLK . G .

UniRef100\_A0A0F2JPH4 . . . . . K L I R A V T L S N L I A I Y I K . . . . . L . . . K I G . . . R L S A L C G . . A . T A . S G T G A . S C G I T Y L L G . G G K .  
UniRef100\_A0A0F5PPY6 . . . . . K I I R A I T L S H L L T A Y V K . . . . . A . . . Y I G . . . V L S P I C G . . C G V A . A G V G M . S A G L T Y L L G . G S . .  
UniRef100\_A0A0G0R539 . . . . . R I L K S I A L A H I I N A Y C K . . . . . A . . F F G . . . D L A P A C G . . C A V S . A G L G A . T A A I Y Q I N . P T . .  
UniRef100\_A0A0G1DYX4 . . . . . R V L R S I A L S H L L N A Y V K . . . . . A . . F A G . . . E L S P I C H . . C A I A . A G V G A . A A G C V Y Q E K . . H . .  
UniRef100\_A0A0G4JSG9 . . . . . K L A R A L M L S H L T A I Y I H . . . . . S . . K L P . . . A L S A L C A . . A . T T . A S M G A . A A G I A W L I A . G R . .  
UniRef100\_A0A0H2QFG3 . . . . . Q L A R A L M L S H L M A I Y I H . . . . . S . . Q L P . . . P L S A L C A . . A . T T . A A M G A . A A G I A W L L E . A R . .  
UniRef100\_A0A0H3H4Y6 . . . . . T L A R A L A L S H L T A I S I H . . . . . S . . R Y T . . . R L S A L C A . . A . S T . A A M G A . A A G M A W L F T . R D . .  
UniRef100\_A0A0J1G0F0 . . . . . K I L R G L A I S I L L T V H T K . . . . . H . . Y L G . . . R L S V L C G . . C S I S . A A M G V . S C G I I Y M L G . G D . .  
UniRef100\_A0A0J1G1X4 . . . . . A L Y R A L A F A N L V S I R L K . . . . . S . . G I G . . . K L S A Y C G . . A . V S . A G C A A . A C G I A Y L . . D . .  
UniRef100\_A0A0J1H5D8 . . . . . T V L R A L M M S H L M A I Y I K . . . . . S . . Y Q N . . . K L S A L C G . . A . T T . A S M G A . V A G M T W L L G . G Q . .  
UniRef100\_A0A0J1J1I6 . . . . . T T I R A L M M S H L M A I Y I K . . . . . S . . Y Q N . . . K L S A L C G . . A . T T . A S M G A . V A G M T W L L G . G E . .  
UniRef100\_A0A0J5FUC8 . . . . . Q L A R A L M L S H L M A I Y I H . . . . . N . . K L P . . . T L S A L C A . . A . T T . A S M G A . A A G I A W L I E . Q R . .  
UniRef100\_A0A0J5W6F6 . . . . . K M I R A V A L S H L I T I H I K . . . . . S . . K F G . . . R L S A L C G . . V . T A . A G M G A . S A A I V Y L L D . G Q L . .  
UniRef100\_A0A0J8V6C6 . . . . . T M I R A L M L S H L M A I Y I K . . . . . S . . H Q N . . . K L S A L C G . . A . T T . A S M G A . V A G M T W L L G . G Q . .  
UniRef100\_A0A0J8VFK9 . . . . . T L A R A L I M S H L G A V Y I K . . . . . S . . H Y P . . . P L S A F C G . . N . T A . T S S A A . A M A M V Y L R G . G D . .  
UniRef100\_A0A0J8Y0Z6 . . . . . T L A R A L I M S H L G A V Y I K . . . . . S . . Y Y P . . . P L S A F C G . . N . T A . T S S A A . A M A M V Y L R G . G D . .  
UniRef100\_A0A0L0AS64 . . . . . R L A R A L M L S H L S A I Y I H . . . . . Y . . Q L P . . . K L S A L C A . . A . T T . A A M G A . A A G M A W L V D . G R . .  
UniRef100\_A0A0L6Z6T5 . . . . . K L Y R A L V I S N L I T L H L K . . . . . T . . S I G . . . R L S A F C G . . V . I C . A G C G S . G A G I A Y L Y . G . . .  
UniRef100\_A0A0M0T7J5 . . . . . Q L A R A L M L S H L I A I Y I H . . . . . N . . K L P . . . T L S A L C A . . V . T T . A S M G A . A A G I A W L I E . K H . .  
UniRef100\_A0A0M3F2I2 . . . . . M L A R A L I L S H L V A I Y I H . . . . . N . . Q L P . . . R L S A L C A . . A . T T . A A M G A . A A G M A W L M G . G N . .  
UniRef100\_A0A0N8IRU1 . . . . . T L A R A L A L A H L A A I S I H . . . . . M . . R Y T . . . R L S A L C A . . A . S T . A A M G A . A A G M S W L L T . Q D . .  
UniRef100\_A0A0P8WD60 . . . . . R L Y R A L C I S N L I A I Y Q K . . . . . T . . K I G . . . R L S A Y C G . . A . V S . A A T G A . G A G I I Y L Y . G . . .  
UniRef100\_A0A0P9CI45 . . . . . K L A R A L I I S H L C A I Y I K . . . . . S . . Y Y P . . . P L S A F C G . . N . T A . T S S A A . A M A M V Y L R G . G D . .  
UniRef100\_A0A0Q3VF08 . . . . . K M I R A V A L S H L I T I H I K . . . . . S . . K F G . . . R L S A L C G . . V . T A . A G M G A . S A A I V Y L L D . G G I . .  
UniRef100\_A0A0Q4B7W8 . . . . . K L T R A L A L S H L V A I H I K . . . . . G . . Y L G . . . R L S A L C G . . C . V V . A S S G A . S G A I A Y L M G . G G . .  
UniRef100\_A0A0Q9M0K2 . . . . . Q L I R A V A L S H L V T I H I K . . . . . S . . K F G . . . R L S A L C G . . V . T V . S G T G A . S C G I T Y L L G . G G K . .  
UniRef100\_A0A0Q9SDW4 . . . . . K L I R A V A L S H L V T I H I K . . . . . S . . K F G . . . R L S A L C G . . V . T V . S G T G A . S C G I T Y L L G . G G I . .  
UniRef100\_A0A0R1J2S2 . . . . . E L I R A L A L S H L T A L Y I H . . . . . S . . F L P . . . L L S A Y C A . . V . D S . A S M G A . G V C V Y L L K . N D . .  
UniRef100\_A0A0R1KC0R . . . . . Q L I R A L T L S H L T A L Y V H . . . . . A . . F L P . . . V L S A F C A . . T . D S . A A M G A . A T G S I Y L L T . N N . .  
UniRef100\_A0A0R1QCJ6 . . . . . H L V R A L T L S H L T A L Y I H . . . . . S . . F L P . . . V L S A F C A . . T . A S . A A M G A . A A G T V Y L R T . G N . .  
UniRef100\_A0A0R1QVN7 . . . . . Q L T R A L T L S N L T A L Y I H . . . . . A . . F L P . . . V L S A F C A . . T . D S . A A M G A . A V G I V Y L K T . N D . .  
UniRef100\_A0A0R1RS54 . . . . . Q L I R A Q T L S H L T A I Y V H . . . . . A . . F L P . . . V L S A F C A . . T . D S . A G M G A . A A G I C Y L L G . H D . .  
UniRef100\_A0A0R1WE98 . . . . . Q L I R A L A L S H L T A I Y V H . . . . . S . . F L P . . . I L S A Y C A . . T . H S . A A M G A . A T G I C Y L L G . G N . .  
UniRef100\_A0A0R1XN77 . . . . . Q L I R A L A L S H L T A I Y V H . . . . . S . . F L P . . . I L S A Y C A . . T . H A . A A M G A . A T G I A Y L L S . D D . .  
UniRef100\_A0A0S7YTK7 . . . . . A V L K A V G L S H I L T A Y I K . . . . . S . . F T G . . . R L S A V C G . . C S V A . A G A G A . T A G I T Y L M G . G N . .  
UniRef100\_A0A0T9SYJ6 . . . . . T L A R A L A L A H L V A I S I H . . . . . E . . R Y T . . . R L S A L C A . . V . S T . A A M G A . A A G M S W L L T . R D . .  
UniRef100\_A0A0U1P249 . . . . . V M I R A V A L S H L L T I H I K . . . . . S . . K F G . . . R L S A L C G . . V . T A . A G M G A . S G A I A Y L L G . G G L . .  
UniRef100\_A0A0U9HKX7 . . . . . K I I V R A V T L S L L V T I Y V K . . . . . S . . Y T G . . . T L S P V C G . . C G V A . A G V G A . G A G V T Y M L G . G N . .  
UniRef100\_A0A0V8QFY1 . . . . . K L Y R A L A L S N L T A I H Q K . . . . . T . . P I G . . . R L S A Y C G . . A . V N . A G A G A . G A G I A Y L C . G . . .  
UniRef100\_A0A0W1JFM7 . . . . . K L Y R A L V V S N L I T L H L K . . . . . T . . G I G . . . R L S A F C G . . V . I C . A G C G S . G A G I A Y L H . G . . .  
UniRef100\_A0A0W7U3I6 . . . . . Q L T R A L V M S H L I A I Y I K . . . . . T . . Y Q N . . . K L S A L C A . . A . S T . A A M G S . G A A I T W L L G . G Q . .  
UniRef100\_A0A0X8V7S8 . . . . . A I L R A V A L S G L V T I Y S K . . . . . H . . Y T G . . . R L S P L C G . . C V L G . G G S G A . A A G L V F L M G . G G A . .  
UniRef100\_A0A101WFD3 . . . . . R L Y Q A L C I S N L I A I H Q K . . . . . T . . K I G . . . R L S A Y C G . . A . V S . A A T G A . G A G I T Y L Y . G . . .  
UniRef100\_A0A101WKD0 . . . . . K L A K A L A I S H L V T A Y I K . . . . . N . . Y T G . . . R L S A V C G . . C G V A . A S T G A . S A A V A W L M G . L S Y . .  
UniRef100\_A0A110A741 . . . . . T L L R A E F L G M L V I M Y M K . . . . . Y . . H V G . . . R L S P I C G . . A . T L . A A S G G . A A G M T Y M M G . G N L . .  
UniRef100\_A0A124F8X5 . . . . . T I I K S I G F S H L L N S Y V K . . . . . A . . F T G . . . S L S S L C G . . C A I A . A G V G A . A A A I V Y Q Q Q . K D . .  
UniRef100\_A0A124IG43 . . . . . R L A K A I A L S H L I L N Y I K . . . . . Q . . Y T G . . . S L S A V C G . . C A V A . A G A G A . S A A I A W M L D . G T D . .  
UniRef100\_A0A132HQ55 . . . . . R T I R A V A L S N L V A I H Q K . . . . . T . . G I G . . . R L S A Y C G . . A . V S . A G C A S . G C G I A Y L M . G . . .  
UniRef100\_A0A132HZ15 . . . . . Q I T R A L V L S H L T S I Y V K . . . . . H . . G I G . . . R L S A L C G . . I . V N . A S I G V . A A G L V F L Q G . G G . .  
UniRef100\_A0A133N227 . . . . . T L Y R G L L I T N L V A L H I K . . . . . R . . F I G . . . R L S A F C G . . V . T S . A G V A A . G A G I C Y M E . T . . .  
UniRef100\_A0A133NAZ2 . . . . . Q M I R G L F M S H M I T I H V K . . . . . E . . N V G . . . R L S A Y C G . . A . I C . A S S G V . A A A L T Y L E . G . . .  
UniRef100\_A0A133PQ02 . . . . . K L Y R A L I F A N L I G L Y I K . . . . . E . . G I G . . . E L S A Y C G . . V . V S . A G C A S . V C G L A F M K . D . . .  
UniRef100\_A0A133QF24 . . . . . E L V R A L T L S H L T A I Y I K . . . . . Q . . N L G . . . T L S A L C G . . C . I V . A S T G S . S C G I T Y L M G . G N . .  
UniRef100\_A0A133SJ07 . . . . . R R I R A L A L S N M V A I Y A H . . . . . G . . Y L P . . . K L S A F C A . . V . V T . A A M G A . A A G M A W L L D . T K . .  
UniRef100\_A0A134A7V5 . . . . . T L V R A V A L S D L V A V H V K . . . . . Y . . F I G . . . E L S A F C G . . A . V S . A A C G A . G A G I C Y L R . G . . .  
UniRef100\_A0A134AE04 . . . . . T L L R G L L F S N L L G L Y Q K . . . . . K . . N I G . . . K L S A F C G . . V . V S . A A S A A . I C G I A F L N . G . . .  
UniRef100\_A0A134B344 . . . . . V T T R A I M L S S L L V V Y I K . . . . . Q . . L L G . . . R L S C L C G . . M . V V . S G I G S . A C A I T Y L M G . G T . .  
UniRef100\_A0A136WEN1 . . . . . K L L R A E F L G M L I I M Y M K . . . . . C . . H V G . . . R L S P I C G . . A . T L . A A A G G . A A G M T Y M M G . G K L . .  
UniRef100\_A0A136W147 . . . . . Q L L R A L A M S F L M T I C V K . . . . . N . . R I G . . . R V S S M C A . . C V T A . A S Q I I . A A G A T M L L G . G D L . .  
UniRef100\_A0A136W1A1 . . . . . R I L R A I A L S C L I T I Y S K . . . . . H . . Y T G . . . R L S A L C G . . C V L G . G G S G A . A A G L V Y L M G . G G A . .  
UniRef100\_A0A137SV0P . . . . . T L Y R A L I F G N L I G L Y L K . . . . . Q . . G I G . . . K L S A Y C G . . V . V S . A A S A S . I C G I A Y M E . G . . .  
UniRef100\_A0A140L3J8 . . . . . K L A K A L A M S H M V N G Y I K . . . . . H . . H I G . . . R L S A L C G . . C G V A . S S T G A . A V G I A W L M G . A N Q . .  
UniRef100\_A0A143WXQ4 . . . . . Q L Y R A L V L S N L V A I H Q K . . . . . T . . G I G . . . R L S A F C G . . A . V V . A G A A A . G A G I A Y L D . G . . .  
UniRef100\_A0A143XS55 . . . . . Q T I R A L T L S H L T V I Y I K . . . . . Q . . S L G . . . R L S A L C G . . C . V C . A A T G S . S C G I Y L M G . G G . .  
UniRef100\_A0A150FRN2 . . . . . K L A K A L A I S H L I T T Y I K . . . . . N . . Y T G . . . R L S A V C G . . C G V A . A S T G A . A A A I A Y L M G . C D Y . .  
UniRef100\_A0A151B5Y3 . . . . . K L L R A L A I G H L T A I H I K . . . . . T . . Y L G . . . R L S A L C G . . A . T V . A A T G A . S V G I T Y L L G . G N . .  
UniRef100\_A0A154BWC5 . . . . . T L V R A L A I S A I T T L Y I K . . . . . S . . F T G . . . S L S A L C G . . C A V A . A A T G A . S A A I T W M L G . G D . .  
UniRef100\_A0A160IJG9 . . . . . K M L R A V T L S H L L S I H M K . . . . . S . . K F G . . . R L S A L C G . . V . T V . A G A S A . S A A I T Y L M D . D N L . .  
UniRef100\_A0A162SKD8 . . . . . K L Y R A L V V S N L I T L H L K . . . . . T . . G I G . . . R L S A F C G . . V . I C . A G C G S . G S G I A Y L H . G . . .  
UniRef100\_A0A163SFG2 . . . . . K M L R A V T L S H L L S Y M K . . . . . S . . K F G . . . R L S A L C G . . V . T V . A G A S A . S A A I T Y L L S . D N L . .  
UniRef100\_A0A165STA7 . . . . . Q L T R A L V M S H L V A I Y I K . . . . . T . . Y Q N . . . K L S A L C A . . A . S T . A A M G A . G A A I T W L L G . G Q . .  
UniRef100\_A0A173SRV1 . . . . . K T Y R A L V L S N L V A I H Q K . . . . . E . . G I G . . . R L S A Y C G . . A . V S . A A G A A . G A G I A Y L C . G . . .  
UniRef100\_A0A173VH50 . . . . . T L W R A T A L S Y L I T M Y I K . . . . . E . . Y S G . . . R L S A F C G . . C G I A . A G T M G . A C G L A Y L Q G . A D G . .  
UniRef100\_A0A173XRW8 . . . . . E M Y R A L I L A S L V T I H Q K . . . . . T . . F I G . . . R L S A Y C G . . A . V S . A A C G S . G A A I T Y M K . G . . .  
UniRef100\_A0A173YG33 . . . . . K L Y R A L V V S N L I A V H Q K . . . . . K . . Y I G . . . S L S A Y C G . . A . V S . A G C G A . G A A I T Y L S . G . . .  
UniRef100\_A0A174D2T3 . . . . . E I Y R A L C V S N L V A I N Q K . . . . . K . . Y I G . . . S L S A Y C G . . A . V C . A A A G A . G A G I T Y L C . G . . .  
UniRef100\_A0A174L3Z4 . . . . . K M Y R A L A L S N L V A I H Q K . . . . . T . . G I G . . . R L S A Y C G . . A . V S . A G A A A . G A G I A Y L C . G . . .  
UniRef100\_A0A174MR10 . . . . . K M I C A A A L S Q L I T V Y T K . . . . . Q . . Y T G . . . R L S P I C G . . C G L A . A A I G A . A A G I T W M N H . G T . .  
UniRef100\_A0A174RFL9 . . . . . K L Y R A L V V S N L I S I H Q K . . . . . K . . Y I G . . . S L S A Y C G . . A . V S . A A C G S . G A A I T Y L Y . G . . .  
UniRef100\_A0A174SL13 . . . . . D L A R A L V I S N L M T I H L K . . . . . E . . Y M G . . . R L S P L C G . . A G I A . G A T G A . C C G I T Y L L G . G N . .  
UniRef100\_A0A176U761 . . . . . E L L R A L L V S N L I A I H I K . . . . . T . . G I G . . . P L S A F C G . . A . V S . A G C A A . G C A I A F L L . G . . .  
UniRef100\_A0A178K336 . . . . . T L I R A L M L S H L M A I Y I K . . . . . S . . H Q N . . . K L S A L C G . . A . T T . A S M G A . V A G M T W L L G . G E . .  
UniRef100\_A0A191HT73 . . . . . Q L I R G V L L S H L I T I Y I K . . . . . S . . K F G . . . V L S A L C G . . A . T T . A G T G A . S C G I A Y L L D . G N L . .  
UniRef100\_A0A194AJ91 . . . . . T L F R A L V V S N L I T I H Q K . . . . . T . . G I G . . . R L S A Y C G . . A . I S . A G V G A . G A G I A W L H . G . . .  
UniRef100\_A0A198F1W8 . . . . . K L A R A L I L S H L L A I Y I H . . . . . H . . K F P . . . A L S A L C A . . A . T T . A S M G A . A G A I A W L M E . E R . .  
UniRef100\_A0A1A7NS13 . . . . . Q R T R A L F L S H L M A I F I H . . . . . S . . K L P . . . K L S A L C A . . V . T T . A A M G S . C A G I S Y L I T . N R . .  
UniRef100\_A0A1A7P382 . . . . . Q R T R A L F L S H L M A I F I H . . . . . S . . K L P . . . K L S A L C A . . V . T T . A A M G S . C A G I S Y L I T . N N . .  
UniRef100\_A0A1A9FGK8 . . . . . T L A R A L M L S H L S A I Y I H . . . . . H . . Q L P . . . R L S A L C A . . A . T T . A A M G A . A A G M A W L L D . G R . .  
UniRef100\_A0A1A9SF16 . . . . . K R L R A L F L S H L M A I Y I H . . . . . S . . K L P . . . K L S A L C A . . V . T T . A S M G S . C A G I A Y L L T . G K . .  
UniRef100\_A0A1B1FZ18 . . . . . K L Y R A L F M S H L T T V H V K . . . . . T . . N V G . . . R L S A Y C G . . A . M T . A S A A V . S G T L V Y L E . G . . .  
UniRef100\_A0A1B1Z1U9 . . . . . K M L R A V T V S H L L S I Y M K . . . . . S . . K F G . . . R L S A L C G . . V . T V . A G A S A . S A A I T Y L L S . D D L . .  
UniRef100\_A0A1B2I113 . . . . . E I A K A V A V S H I A T S F V K . . . . . H . . N L G . . . R L S P V C G . . C S V A . A G A G A . A A G M T Y L M G . G S . .  
UniRef100\_A0A1B3FFN2 . . . . . Q L A R A L M L S H L S A I Y I H . . . . . Y . . R L P . . . R L S A L C A . . A . T T . A S M G A . A A G M A W L A D . G R . .  
UniRef100\_A0A1B3WQ23 . . . . . E L Y R A L I L A N L L G L H Q K . . . . . A . . G L G . . . R L S A Y C G . . A . V S . A A C A S . G A G I A Y L M . G . . .  
UniRef100\_A0A1B6BB21 . . . . . H L A K A I A M S H I V N S Y I K . . . . . N . . A I G . . . R L S A L C G . . C G V A . A G T G A . S V G L A W L M G . A T Q . .  
UniRef100\_A0A1B7HH18 . . . . . K L A R A L I L S H L T A I Y I H . . . . . H . . Q L P . . . A L S A L C A . . A . T T . A A M G A . A A G I T W L I D . G S . .  
UniRef100\_A0A1B7XD54 . . . . . E M A R A L I M S H L T S I H L K . . . . . H . . H L G . . . R L S A L C G . . A . I L . A A T G S . G C G I I M L L G . G K . .  
UniRef100\_A0A1B7XG66 . . . . . E M C R A L I M S H L T S I H L K . . . . . H . . H L G . . . R L S A L C G . . A . I L . A A T G S . G C G I V M L L G . G T . .  
UniRef100\_A0A1B9JTJ9 . . . . . Q L A R A L I L S H T I A I Y I H . . . . . S . . K Y P . . . P L S A L C A . . A . S T . A A M G A . A A G M A W L L G K G E . .  
UniRef100\_A0A1B9K484 . . . . . Q L A R A L I L S H A I A I Y I H . . . . . S . . K F P . . . P L S A L C A . . A . S T . A A M G S . A A G M A W L L S Q G Q . .  
UniRef100\_A0A1B9KFW9 . . . . . Q L A R A L V L S H T L A I Y I H . . . . . S . . K F P . . . P L S A L C A . . A . S T . A A M G S . A A G M A W L L N G Q Q . .  
UniRef100\_A0A1B9KTE7 . . . . . Q L A R A L M L S H T I A I Y I H . . . . . S . . K F P . . . P L S A L C A . . A . S T . A A M G A . A A G M A W L L G Q K . .  
UniRef100\_A0A1B9LJ45 . . . . . Q L A R A L I L S H T I A I Y I H . . . . . S . . K F P . . . P L S A L C A . . A . S T . A A M G S . A A G M A W L L G K G Q . .

UniRef100\_A0A1C0A496 .....QL..A.RALI..LSHTIAIYIH.....S....KF.P.....PLSALCA..A..ST..AAMGA..AAGMAWLLGKEQ..

UniRef100\_A0A1C1A396 .....QL..I.RAVA..LSHFVTIHIK.....S....KFG.....RLSALCG..V..TV..SGTGA..SCGITYLLG..GGK..

UniRef100\_A0A1C4GIU9 .....KL..ARALM..LSHLSAIYIH.....H....QLP.....RLSALCA..A..TT..AAMGA..AAGMAWLLMDE..GQ..

UniRef100\_A0A1C5L1P3 .....QM..Y.RALV..LANLTTIHQK.....T....PIG.....RLSAYCG..A..VS..AGVGA..GAGIAYLC..G...

UniRef100\_A0A1C5PCW1 .....EL..Y.RALI..VSNLVAIHQK.....H....YIG.....SLSAFCG..A..VT..AASGA..GAAITYMM..E...

UniRef100\_A0A1C5W129 .....RL..L.RATA..LSYLTIMYIK.....E....YSG.....RLSAFCG..CAIA..AGTGM..ACALAWLKG..GDL..

UniRef100\_A0A1C5W9L6 .....EL..A.KALA..TSHLVTAYVK.....N....FTG.....RLSAVCG..CGVA..ASTGA..TAAISWILMS..KDI..

UniRef100\_A0A1C5ZT91 .....KL..I.RACA..LSNLTITIK.....S....RFG.....VLSALCG..A..VV..ASTGV..ASAVVWLRG..GGL..

UniRef100\_A0A1C6BRP6 .....AL..L.RATA..LSYLTIMYIK.....E....YSG.....KLSAFCG..CGIA..AGTGM..ACGLAYLRK..ASE..

UniRef100\_A0A1C6C657 .....KM..Y.RALV..LSNLTATYQK.....V....GIG.....RLSAYCG..A..VS..AGAAA..GAGIAYLN..G...

UniRef100\_A0A1C6CG70 .....KL..V.RALV..LSNLVALNQK.....R....YIG.....SLSAYCG..A..VS..AATGA..ACGVAYLY..D...

UniRef100\_A0A1C6CHU6 .....QL..Y.RALC..ISNLTAVYQK.....Y....EIG.....RLSAYCG..A..VS..AGAGA..GAGIAYLL..G...

UniRef100\_A0A1C6E2C8 .....KL..Y.RALV..VSNLTAVHOK.....Y....YIG.....GLSAYCG..A..VC..SACGV..GAGITYMY..G...

UniRef100\_A0A1C6FZ07 .....EM..L.RALA..LSQLITIHQK.....S....HIG.....KLSALCG..CAIA..AGIGA..ACGITYLEG..GQ..

UniRef100\_A0A1C6GTU2 .....KL..Y.RALL..LANLVTIHEK.....A....GIG.....RLSAYCG..A..VS..AGAGA..GAGIAYLH..G...

UniRef100\_A0A1C6HE15 .....KM..L.RAVV..LSDLTITHQK.....S....GIG.....RLSAYCG..A..TS..AGCGA..GAGIAYLY..G...

UniRef100\_A0A1C6KKO2 .....TL..Y.RALV..LSNLAAIHQK.....F....YIG.....RLSAYCG..A..VS..AGAAA..GAGITYLL..G...

UniRef100\_A0A1C7FR01 .....AT..V.KALA..FSHLLNVYIK.....L....FTG.....KLSATCG..CGVS..AATAA..SAAMVWLLG..GD..

UniRef100\_A0A1C7FR29 .....QL..Y.RALL..VSDLVTIYQK.....A....GIG.....RLSAYCG..A..VS..AGVGA..GAGIAYLQ..G...

UniRef100\_A0A1C7GSP5 .....KL..Y.RSLL..VSDLVTIQQK.....S....GIG.....RLSAYCG..A..VS..AGVGA..GAGIAYML..D...

UniRef100\_A0A1C7GTK2 .....KL..Y.RALL..VSDLVTIHQK.....S....GIG.....RLSAYCG..A..VS..AGVGA..GAGIAYLL..D...

UniRef100\_A0A1C7I701 .....KI..L.RALA..LSILLTVHTK.....H....YLG.....RLSVLCG..CSIS..SAMGV..ACGIVFMLG..GT..

UniRef100\_A0A1C7I949 .....TL..Y.RSLV..FSNLLTITQK.....T....YIG.....KLSAFCG..AVS..ASCAS..GAALTVMV..G...

UniRef100\_A0A1D7JX79 .....KL..Y.RSLI..VSSLTITHQK.....T....GIG.....RLSAFCG..A..VS..AGCGA..GAGIAYLN..G...

UniRef100\_A0A1D8GD74 .....SY..A.RALA..ISHIVTGYIK.....H....YTG.....RLSALCG..CGVA..AATGA..SVAIAWMLG..ADE..

UniRef100\_A0A1D9BEG4 .....TL..A.RALM..LSHLMVAVVH.....G....KLP.....KLSALCA..V..TT..ASMGA..AAGIAWLLR..GG..

UniRef100\_A0A1D9FM70 .....KI..I.RAAA..LSNLVTSISK.....N....KLG.....RLSSLCG..V..VL..ASAGA..SCGIYLLD..GNI..

UniRef100\_A0A1E3AN94 .....KM..Y.RALV..VSNLTAIHQK.....K....YIG.....SLSAYCG..A..VS..AACGA..GAAITYLY..G...

UniRef100\_A0A1E3AP59 .....KL..Y.RALL..ISNLTATHLK.....E....GIG.....RLSAYCG..A..VS..AGTGA..GAGIAYLM..G...

UniRef100\_A0A1E3AX25 .....EL..Y.RALL..VSNLIAIHLK.....N....GIG.....PLSAFCG..A..VC..AGCAA..GCGIAWLQ..G...

UniRef100\_A0A1E3JUL5 .....KL..Y.RSLA..LSILITIHAK.....Q....YIG.....RLSVLCG..CSIA..SAIGV..GGAMVFLYG..GT..

UniRef100\_A0A1E3UYE5 .....KL..A.RALI..MSHLGAIYIK.....S....HYIP.....PLSAFCG..N..TV..TSAAA..SMAMVFLAG..GS..

UniRef100\_A0A1E4LLH0 .....ML..M.RALV..VSDLTITHQK.....T....GIG.....RLSAFCG..A..TS..AGCGA..ASGIAYL..D...

UniRef100\_A0A1E5DC87 .....DL..A.RALI..LSHLGAIYIK.....S....HYIP.....PLSAFCG..N..TV..TSAAA..SMAIYVLAG..GS..

UniRef100\_A0A1E7GP88 .....TI..L.RAIG..LSHIITAYVK.....A....HTG.....RLSAVCG..CSVA..AGAGA..TAGITYLLTG..GD..

UniRef100\_A0A1E7GUS9 .....RI..L.RSIA..LSHLINSYIK.....C....FTG.....HLSALCG..CSIA..AGVGA..AVAIIVYQMK..GK..

UniRef100\_A0A1E8VY78 .....AL..V.RAVV..LSDLTAVHVK.....Y....YIG.....ELSAFCG..A..VC..AACGA..GAGIVYLR..G...

UniRef100\_A0A1F7FM76 .....RL..S.EALA..TSHGITSILK.....H....HSG.....TSLAMCG..CVVC..SGTGL..TAGATYLLG..GD..

UniRef100\_A0A1F8U1J0 .....RL..A.KALA..TSHLVTAYIK.....N....YTG.....RLSAVCG..CGVA..ASTGS..AAGIAWLMN..LNY..

UniRef100\_A0A1F9AZ30 .....KT..A.QALA..LGHLLTSYVK.....F....FTG.....RLSALCG..CTIA..AGIGA..SAGVTVLLG..GS..

UniRef100\_A0A1F9KWT1 .....TL..F.RALI..VSNLVTIHQK.....T....GIG.....RLSAYCG..A..VS..AGIGA..GAGIARLH..G...

UniRef100\_A0A1F9NH53 .....TI..L.RAIG..LSHIITAYVK.....A....HTG.....RLSAVCG..CSVA..AGAGA..TAGITYLVG..GD..

UniRef100\_A0A1F9QJ51 .....RI..L.RSIA..LSHLVNSYIK.....V....FTG.....ELAPICG..CAVA..AGVGA..SVAVVWQRA..GA..

UniRef100\_A0A1F9QNF5 .....RV..L.KSIA..LSHLVNSYIK.....V....FTG.....ELAPICG..CAVA..AGVGA..SVAIVYQLK..GV..

UniRef100\_A0A1F9RH62 .....RI..L.KSIA..LSHLVNSYIK.....V....FTG.....ELAPICG..CAVA..AGVGA..SVAIVWQRR..GA..

UniRef100\_A0A1F9S618 .....TV..L.RSIA..LSHLNAYVK.....V....HTG.....GLAPICG..CAIA..AAVGA..AAAIIVYQRN..GP..

UniRef100\_A0A1F9SG49 .....RI..L.KSIA..LSHLVNSYIK.....V....FTG.....ELAPICG..CAVA..AGVGA..SVAIVWQRN..GA..

UniRef100\_A0A1F9TAK5 .....RI..L.KSIA..LSHLVNSYIK.....V....FTG.....ELAPICG..CAVA..AGVGA..SVAIVWQRS..GP..

UniRef100\_A0A1F9WBA0 .....RI..L.KSIG..LSHLVNSYIK.....V....FTG.....ELAPICG..CAVA..AGVGA..SVAVVWQQR..GA..

UniRef100\_A0A1F9XU28 .....KV..L.KSIA..LSHLVNSYIK.....V....FTG.....ELAPICG..CAVS..AGVGA..AVAIIVYQOK..GS..

UniRef100\_A0A1G3Y0Y6 .....AL..Y.RALV..FSNLIAIHQK.....T....SLG.....KLSAYCG..A..VS..AACGS..GAAITYLS..G...

UniRef100\_A0A1G5G075 .....KL..A.KALA..MSHIIINSYIK.....N....YIG.....RLSVLCG..CGVA..AGTGA..AVAITWLMG..GKT..

UniRef100\_A0A1G5RWL5 .....DQ..I.KALA..LSHLLNSYIK.....A....EIG.....RLSALCG..CGIA..AGTGA..SAAIWALET..RDP..

UniRef100\_A0A1G7TJU5 .....EL..I.RALT..LSHLTATYIK.....Q....SLG.....TLSALCG..C..VV..ASIGS..SVGITYLMG..GD..

UniRef100\_A0A1G7ZR90 .....TL..T.RALT..LSHLMVAYIH.....D....HLP.....KLSALCA..V..TT..AAMGA..AAGMAWLLG..GD..

UniRef100\_A0A1G9HCH6 .....KM..V.RAAF..FGNIVNCYIK.....A....FAG.....KLSGICG..CAIG..AGIGA..TVGITWMLG..GTD..

UniRef100\_A0A1G9IX78 .....KL..A.RALA..FSLHVTAYIK.....E....YTG.....KLSPVCG..CGVA..AGTGA..SVAIAWIMG..ATD..

UniRef100\_A0A1G9V926 .....LL..Y.RSLV..LFTNLMAIYQK.....F....FIG.....NLSAYCG..A..VS..AGAAA..GCGIAYLY..G...

UniRef100\_A0A1G9WAQ0 .....KL..I.RALA..FSHMTAIYIH.....G....FLP.....KLSALCG..G..LT..SSMG..AAGMALMT..GD..

UniRef100\_A0A1G9YI22 .....RL..A.RALA..LSNLVTIHIK.....H....YIG.....RLSPLCG..SGIA..GGVGA..NSGIYLMG..GS..

UniRef100\_A0A1G9ZQB5 .....KI..V.KSIA..LSHLINSYIK.....C....YTG.....NLSLCLG..CAIA..AGVGA..AVAIIVYQQA..GK..

UniRef100\_A0A1H0QX52 .....TL..L.RAIG..LSHIITAYVK.....A....HTG.....RLSAVCG..CSMA..AGAGA..TAGITYLVG..GD..

UniRef100\_A0A1H0YFU9 .....QL..A.RALC..TSHIGAGYIK.....S....HYIP.....LLSAYCG..NSAT..CAAGA..SA..LVYLMG..GS..

UniRef100\_A0A1H2XK87 .....RL..I.RAIF..LALMLNKYVK.....L....YTG.....KLSAMCG..CAIG..AGVGA..SGAIAWMLG..GNQ..

UniRef100\_A0A1H3EXX2 .....QL..I.RAVA..LSHLVTIYIK.....S....KFG.....RLSALCG..V..TV..SGTGA..SCGITYLLG..GGK..

UniRef100\_A0A1H3LER9 .....KL..I.RALV..ISNLTVAIHQK.....H....HLG.....KLSALCG..C..VT..AAGGA..SSGITYILG..GD..

UniRef100\_A0A1H3WAT6 .....KI..V.ESIA..LSHLVNSYIK.....C....YTG.....LSLPTICG..CSIA..AGVGA..AVAIIVYQQA..GR..

UniRef100\_A0A1H3Y3B2 .....KR..M.RALI..VSNLVSIIYIK.....H....YIG.....ALSAPCG..A..VS..ASCGA..GAAITYMS..G...

UniRef100\_A0A1H4BKZ7 .....EL..I.RALM..LSHLTAIYIK.....Q....SLG.....KLSALCG..C..VV..ASIGS..SCGITYLMG..GD..

UniRef100\_A0A1H8B655 .....KL..Y.RALV..TANLVSITHQK.....K....YIG.....SLSAYCG..A..TS..AGCGA..GCGITYLY..G...

UniRef100\_A0A1H8CME3 .....RL..Y.RALC..VSNLIAIHQK.....T....KIG.....RLSAYCG..A..VS..AATGA..GAGITYLY..G...

UniRef100\_A0A1H8GDB8 .....KL..C.RALA..TSHLTTAYIK.....N....FTG.....RLSAMCG..CGVA..AATGS..TAGIAWLMG..ESI..

UniRef100\_A0A1H9PFF8 .....DL..V.RAVV..LSDLTAVHVK.....Y....FIG.....ELSAFCG..A..VS..AGCGA..GAGICMLR..G...

UniRef100\_A0A1I0AD93 .....QR..A.RALI..LSHLIAVYIH.....S....KLP.....KLSAMCA..V..ST..AAMGS..AAGMAWLLGKE..GE..

UniRef100\_A0A1I0AYQ7 .....KL..A.RALA..TSHMNGYIK.....H....YIG.....RLSVLCG..CAVS..AATGG..AVAITWLMG..GDY..

UniRef100\_A0A1I0DCR3 .....KM..L.RSLL..VSNLVSIIYIK.....H....YIG.....ALSAPCG..A..VS..AACGA..GAAVTYMS..G...

UniRef100\_A0A1I0EJZ8 .....GL..Y.RALV..LANLIAIHQK.....T....GIG.....RLSAYCG..A..VS..AGCAA..GCGIAYLY..G...

UniRef100\_A0A1I0VIM5 .....EL..A.RALA..ISNLTVAIHLK.....S....FIG.....RLSPLCG..AGIA..AATGS..SAAIAYLLG..GS..

UniRef100\_A0A1I0WME0 .....KL..A.RALI..LANLVAIHIK.....A....YLG.....RLSALCG..C..VV..ASSGA..SCGIAYLLG..GS..

UniRef100\_A0A1I1YW91 .....KL..Y.RGLA..VSNLVSIIYIK.....K....KIG.....SLSAPCG..A..SS..AAAGS..GAIVAYLK..G...

UniRef100\_A0A1I1Z2V2 .....RL..C.RALA..LSHLTTAYIK.....N....FTG.....RLSAMCG..CGVA..AATGA..TAGIAWLM..ENI..

UniRef100\_A0A1I2NY07 .....TM..Y.RALV..VANLTSIHLK.....T....GIG.....SLSAYCG..A..TS..AGCGA..AAGITYLY..G...

UniRef100\_A0A1I2QGI1 .....KL..Y.RALV..LSNLVTIYQK.....T....GIG.....RLSAYCG..A..VS..AGCGA..GAGIAYLQ..G...

UniRef100\_A0A1I3H524 .....QL..Y.RALL..LANLVTIHEK.....E....GIG.....RLSAYCG..A..VS..AGAGA..GAGIACWL..G...

UniRef100\_A0A1I3JF93 .....KL..L.RALV..AANLTSIHQK.....R....YIG.....SLSAYCG..V..VS..AACGA..ACGICLL..D...

UniRef100\_A0A1I4GYP0 .....KI..F.KATM..LAHLIGHYAK.....I....YLG.....RLSALCG..LFYA..AAPGV..LGALLYL..A..DKT..

UniRef100\_A0A1I5C3D3 .....LL..Y.RALA..TANLTSIHQK.....R....YIG.....SLSAYCG..A..TS..AGCGA..GCGIAYLN..G...

UniRef100\_A0A1I5GNJ7 .....KI..Y.RALC..ISNLTATYQK.....S....GIG.....RLSAYCG..A..VS..AAAGA..GAGITYLY..G...

UniRef100\_A0A1I5LCC9 .....EL..F.RALA..VADLVTTRQK.....N....VIG.....RLSAFCG..A..VS..AGCGA..AAGIAYLY..G...

UniRef100\_A0A1I5UNY4 .....TL..L.RALA..CGYLVTSICK.....S....RIG.....RHSAMCA..CSVG..ASLGV..AGTAVLFG..GSS..

UniRef100\_A0A1I5UQ63 .....KT..F.RAVT..LSHLVAIYIH.....C....HFG.....LLSALCG..A..TV..AGAGA..ACGLVYLMG..GTL..

UniRef100\_A0A1I5YMS6 .....KL..Y.RALT..LSNLTTHIHK.....S....YIG.....RLSAYCG..A..VS..AAAGA..GAGIAFLH..D...

UniRef100\_A0A1I6BVG1 .....KM..I.RAVA..LSHLITIHIK.....S....KFG.....RLSALCG..V..TA..AGMGA..SGAIVYLLD..GHL..

UniRef100\_A0A1I6J453 .....NL..Y.RSLL..VSNLVTIHLK.....Y....GIG.....RLSAYCG..A..VS..AGAGA..GAGIAYLL..T...

UniRef100\_A0A1I6ZCV6 .....QL..Y.RALL..LSNLVTIHEK.....E....GIG.....RLSAYCG..A..VS..AGAGA..GAGIAWL..G...

UniRef100\_A0A1I7FYH0 .....DL..L.RAAL..LSFLICTYIK.....E....YSG.....RLSAFCG..CGIA..AGTGM..ACGLARLRG..GSS..

UniRef100\_A0A1I7G945 .....KL..L.RALI..TANLTAIRLK.....A....GIG.....CLSAYCG..A..TT..AGTGA..AAGITYLY..G...

UniRef100\_A0A1J0GCP0 .....KL..Y.RALV..ISNLTVTIHK.....T....GIG.....RLSAYCG..A..VC..AGAGS..GAGITYLY..G...

UniRef100\_A0A1J0LMS4 .....EL..Y.RALF..MSHLATVHIK.....T....NVG.....RLSAYCG..V..IC..ASAAV..SGGIAFIQ..G...

UniRef100\_A0A1J4SKW3 .....DV..L.RAIG..LSHIVTAVVK.....A....HTG.....RLSAVCG..CSVA..AGAGA..SAGIAALMG..GD..

UniRef100\_A0A1J4SP72 .....RI..L.KSIA..LSHLVNSYIK.....V....FTG.....ELAPICG..CAIA..AGVGA..SVAIVWQRA..GA..

UniRef100\_A0A1J5H4T2 .....RI..L.RSIA..LSHLINAYVK.....A....FAG.....ELSPICQ..CAIA..AGVGA..AAACVYQKK..K...

UniRef100\_A0A1J5NN52 .....SV..T.RALA..TAFHTNMXYLK.....A....YTG.....KLSPLCG..A..VT..GGA..AAATCWLE..GSC..



|                      |         |     |      |       |           |        |      |   |       |          |      |    |         |        |    |        |      |      |     |
|----------------------|---------|-----|------|-------|-----------|--------|------|---|-------|----------|------|----|---------|--------|----|--------|------|------|-----|
| UniRef100_A0A1K1MT69 | .....AL | ..A | RALI | ..MS  | HLTSIHVK  | .....H | ..HL | G | ..... | RLSAHCG  | ..A  | MV | ..AGTAS | ..GC   | GI | AML    | ILG  | ..GG | ..  |
| UniRef100_A0A1M4PSI3 | .....RL | ..I | RAIF | ..LA  | HIINKEYVK | .....L | ..HT | G | ..... | KLSAMCG  | ..CA | IG | ..AGVGA | ..SG   | AI | SWMLG  | ..GS | ..SQ | ..  |
| UniRef100_A0A1M4STG0 | .....QL | ..Y | RALL | ..IS  | NLVTLHEK  | .....E | ..GI | G | ..... | RLSAYCG  | ..A  | VS | ..AGAGA | ..GA   | GI | AYLLV  | ..T  | ..   | ..  |
| UniRef100_A0A1M4TN05 | .....KL | ..L | RAVA | ..LS  | HLVTYYIK  | .....E | ..YT | G | ..... | KLSPTICG | ..CS | IA | ..AGVGA | ..GAS  | I  | VWGLG  | ..G  | ..DD | ..  |
| UniRef100_A0A1M4UG08 | .....KL | ..L | RAVF | ..FA  | HVNNTYIK  | .....I | ..YT | G | ..... | KLSAMCG  | ..CA | IA | ..AGVGA | ..AV   | GI | WMMG   | ..G  | ..ND | ..  |
| UniRef100_A0A1M4Z8B4 | .....EL | ..I | RAVA | ..VS  | DLITIHQR  | .....S | ..RI | G | ..... | KLSAYCG  | ..A  | VN | ..AGCAS | ..GT   | GI | AYLQ   | ..G  | ..   | ..  |
| UniRef100_A0A1M5GZC8 | .....EL | ..I | RALM | ..LS  | HLTAIYIK  | .....Q | ..SL | G | ..... | RLSALCG  | ..C  | VV | ..AATGS | ..SC   | GI | TYLMG  | ..G  | ..   | ..  |
| UniRef100_A0A1M5KAR9 | .....KL | ..A | KALA | ..IS  | HLITAYIK  | .....N | ..YT | G | ..... | RLSAVCG  | ..CG | VA | ..ASTGA | ..SAA  | I  | TWLMG  | ..G  | ..SY | ..  |
| UniRef100_A0A1M5PK79 | .....RL | ..A | KALA | ..IS  | HVTAIYIK  | .....N | ..YT | G | ..... | RLSAVCG  | ..CG | VA | ..ASTGS | ..AAA  | I  | TWLMG  | ..G  | ..NY | ..  |
| UniRef100_A0A1M5Q7B8 | .....KL | ..A | KSLA | ..IS  | HLVTAYVK  | .....N | ..FT | G | ..... | RLSAVCG  | ..CG | VA | ..ASTGA | ..TAG  | I  | AWLMN  | ..G  | ..EI | ..  |
| UniRef100_A0A1M5T798 | .....EL | ..Y | RALV | ..FA  | NLIGLYLK  | .....Q | ..RI | G | ..... | KLSAYCG  | ..V  | VS | ..AASAA | ..VV   | GI | AYLE   | ..G  | ..   | ..  |
| UniRef100_A0A1M5VGJ1 | .....QL | ..I | RAVT | ..LS  | NLIAIYIK  | .....L | ..KI | G | ..... | RLSALCG  | ..A  | TA | ..SGTGA | ..SC   | GI | AYLLG  | ..G  | ..GK | ..  |
| UniRef100_A0A1M5VKN1 | .....TV | ..L | RAIG | ..LS  | HIITAYVK  | .....A | ..HT | G | ..... | RLSAVCG  | ..CS | VA | ..AGAGA | ..TAG  | I  | TYLVG  | ..G  | ..N  | ..  |
| UniRef100_A0A1M5VQ04 | .....RE | ..I | RAVF | ..LA  | HVINKEYVK | .....I | ..YT | G | ..... | KLSAMCG  | ..CA | IA | ..AGIGA | ..GAG  | I  | TWLLG  | ..G  | ..DD | ..  |
| UniRef100_A0A1M5WD19 | .....KI | ..A | KALA | ..IS  | HINCYVK   | .....Y | ..YI | G | ..... | RLSALCG  | ..CA | VA | ..AATGS | ..GAA  | I  | AYLMG  | ..G  | ..AN | ..  |
| UniRef100_A0A1M5XAW4 | .....AL | ..Y | RALV | ..VSN | LVTIYQK   | .....A | ..GI | G | ..... | RLSAFCG  | ..A  | VC | ..AGCGA | ..GAG  | I  | AFLLH  | ..G  | ..   | ..  |
| UniRef100_A0A1M6BP7P | .....KL | ..M | RALL | ..IS  | NLVSIHQK  | .....S | ..LI | G | ..... | KLSAYCG  | ..A  | VS | ..AATGS | ..AAA  | I  | TYLH   | ..G  | ..   | ..  |
| UniRef100_A0A1M6DK99 | .....QL | ..A | RALV | ..MS  | HLSAIYIK  | .....S | ..HY | P | ..... | PLSAFCG  | ..N  | TV | ..TSAAA | ..AM   | AV | LYLSG  | ..G  | ..S  | ..  |
| UniRef100_A0A1M6GP45 | .....EL | ..A | RALA | ..IS  | SLITIIYIK | .....G | ..YM | G | ..... | RLSPICG  | ..AG | IA | ..ASTGA | ..SAA  | M  | TYLLG  | ..G  | ..D  | ..  |
| UniRef100_A0A1M6GZ67 | .....KI | ..A | RALA | ..IS  | HVITGYIK  | .....N | ..YV | G | ..... | RLTPICG  | ..CS | IA | ..ASTGA | ..TC   | GI | VWLMG  | ..G  | ..TT | ..  |
| UniRef100_A0A1M6H0C3 | .....KI | ..I | RSVT | ..LS  | HLVTIFVK  | .....A | ..YL | G | ..... | TLSPVCG  | ..CG | VA | ..AGVGS | ..AAC  | GL | TYMMG  | ..G  | ..N  | ..  |
| UniRef100_A0A1M6IA50 | .....EM | ..A | RALI | ..MS  | HLTAIHLK  | .....H | ..HL | G | ..... | RLSALCG  | ..A  | IL | ..AATGS | ..GC   | GI | VMLLG  | ..G  | ..D  | ..  |
| UniRef100_A0A1M6I196 | .....TL | ..L | RALI | ..VSN | LITIHQK   | .....T | ..GI | G | ..... | RLSAYCG  | ..A  | VS | ..AGCSA | ..GC   | GI | AWLLH  | ..G  | ..   | ..  |
| UniRef100_A0A1M6J095 | .....EL | ..Y | RALV | ..LS  | NLIAIHLK  | .....T | ..GI | G | ..... | RLSAYCG  | ..A  | VS | ..AGAAA | ..GAA  | I  | AYLC   | ..G  | ..   | ..  |
| UniRef100_A0A1M6K9G6 | .....EM | ..A | RALI | ..LS  | HLIAIHLK  | .....H | ..HL | G | ..... | RLSALCG  | ..A  | IL | ..AATGS | ..GC   | GI | AMLLG  | ..G  | ..   | ..  |
| UniRef100_A0A1M6LSS0 | .....AY | ..A | RALA | ..IS  | HVITGYIK  | .....H | ..YT | G | ..... | RLSALCG  | ..CG | VA | ..AASGA | ..AVA  | I  | AWLMG  | ..G  | ..AD | ..K |
| UniRef100_A0A1M6M080 | .....KI | ..A | RALA | ..IS  | HVITGYIK  | .....H | ..YV | G | ..... | RLTPICG  | ..CS | IA | ..ASTGA | ..TC   | GI | VWLMG  | ..G  | ..SV | ..  |
| UniRef100_A0A1M6MM06 | .....KL | ..A | KALA | ..IS  | HGVTAYIK  | .....N | ..YT | G | ..... | RLSAVCG  | ..CG | VA | ..ASTGA | ..SAA  | V  | TWLMG  | ..G  | ..DY | ..  |
| UniRef100_A0A1M6MYB4 | .....ML | ..Y | RGLV | ..FS  | NLIAVHLK  | .....S | ..GI | G | ..... | KLSAYCG  | ..V  | VS | ..AACGS | ..GAA  | I  | TYLH   | ..Q  | ..   | ..  |
| UniRef100_A0A1M6N718 | .....KL | ..A | RALV | ..I   | ANLVAIHLK | .....S | ..YL | G | ..... | RLSALCG  | ..C  | VV | ..ASSGA | ..SAG  | I  | VYLMG  | ..G  | ..D  | ..  |
| UniRef100_A0A1M6R2P9 | .....KM | ..I | RALA | ..LG  | QLVNAIYIK | .....A | ..HT | G | ..... | ALSAMCG  | ..CG | VA | ..AGIGA | ..SC   | GI | VFMMG  | ..G  | ..N  | ..  |
| UniRef100_A0A1M6R6E8 | .....KL | ..S | KALA | ..IS  | HINCYVK   | .....Y | ..YI | G | ..... | RLSPICG  | ..CG | VA | ..AATGA | ..SAA  | I  | AWLMG  | ..G  | ..AD | ..Y |
| UniRef100_A0A1M6RMI9 | .....SM | ..L | RAIG | ..LS  | HVITAFVK  | .....S | ..FT | G | ..... | RLSAVCG  | ..CS | VA | ..AGAGA | ..AAG  | V  | TYLMG  | ..G  | ..N  | ..  |
| UniRef100_A0A1M6SVH4 | .....TL | ..Y | RALI | ..LS  | NLITIHQK  | .....T | ..GI | G | ..... | RLSAFCG  | ..A  | VC | ..AGVAA | ..GAG  | I  | AYLK   | ..G  | ..   | ..  |
| UniRef100_A0A1M6UB72 | .....TL | ..Y | RALL | ..LS  | NLVTLHEK  | .....E | ..GI | G | ..... | RLSAYCG  | ..A  | VS | ..AGCSA | ..GC   | GI | AFLLC  | ..G  | ..   | ..  |
| UniRef100_A0A1M6WQD0 | .....KV | ..I | RALL | ..LS  | NLIALEYK  | .....V | ..GI | G | ..... | RLSAYCG  | ..A  | VS | ..AGASA | ..AAG  | I  | AYLN   | ..G  | ..   | ..  |
| UniRef100_A0A1M7NFH1 | .....KM | ..Y | RALV | ..VSN | LISIHQK   | .....Q | ..FI | G | ..... | SLSAYCG  | ..A  | VS | ..AACGA | ..GAA  | I  | TYLY   | ..G  | ..   | ..  |
| UniRef100_A0A1M7SGS9 | .....QL | ..A | RALV | ..MG  | NLAAIHVK  | .....K | ..FI | G | ..... | RLSALCG  | ..T  | TV | ..AAIGA | ..CC   | GI | VLLMG  | ..G  | ..K  | ..  |
| UniRef100_A0A1M7Y6B3 | .....QV | ..L | KAlA | ..LS  | HIITGYVK  | .....A | ..HT | G | ..... | RLSAVCG  | ..CS | VA | ..AGAGA | ..TAG  | I  | TYLVG  | ..G  | ..D  | ..  |
| UniRef100_A0A1N6J3Z7 | .....EM | ..A | RALI | ..LS  | HLTAIHLK  | .....H | ..HL | G | ..... | RLSALCG  | ..A  | IL | ..AATGS | ..GC   | GI | VMLLG  | ..G  | ..D  | ..  |
| UniRef100_A0A1N6S191 | .....KA | ..L | KATL | ..LA  | HLITYYIK  | .....L | ..YM | G | ..... | KLSLCCG  | ..LI | SA | ..AAPGI | ..TAA  | L  | LYLD   | ..G  | ..EE | ..  |
| UniRef100_A0A1N6XX89 | .....IV | ..T | RALA | ..VSH | LMALYQK   | .....H | ..FS | D | ..... | RISAFCG  | ..V  | VT | ..AATGA | ..CG   | T  | AYMMG  | ..G  | ..R  | ..  |
| UniRef100_A0A1Q3RG43 | .....KL | ..A | RAAA | ..IS  | HLVNGVIK  | .....S | ..NI | G | ..... | RLSALCG  | ..CG | VA | ..AGTGA | ..SVA  | L  | AWLMG  | ..G  | ..AN | ..R |
| UniRef100_A0A1Q6FZ05 | .....HT | ..I | RALT | ..LS  | HLTAIYIK  | .....Q | ..SL | G | ..... | CLSALCG  | ..C  | VV | ..AATGS | ..SC   | GI | TYLMG  | ..G  | ..G  | ..  |
| UniRef100_A0A1Q6RQ90 | .....LE | ..R | KCVL | ..LS  | SLIAIYIK  | .....S | ..KH | D | ..... | VLSAYCG  | ..A  | AI | ..AGTGV | ..AAA  | L  | TYMMG  | ..G  | ..NE | ..  |
| UniRef100_A0A1Q6SN88 | .....RL | ..Y | RALL | ..VSN | LATIHQK   | .....T | ..GI | G | ..... | RLSAYCG  | ..A  | IS | ..AGCSG | ..GAG  | I  | AYLM   | ..G  | ..   | ..  |
| UniRef100_A0A1Q8D7G1 | .....QL | ..A | RALI | ..MS  | HLGAIYIK  | .....S | ..HY | P | ..... | PLSAFCG  | ..N  | TV | ..TSAAA | ..SM   | AV | YLAG   | ..G  | ..S  | ..  |
| UniRef100_A0A1R0YKY3 | .....TL | ..A | RALA | ..LS  | NLITVHVK  | .....H | ..YI | G | ..... | RLSPICG  | ..SG | IA | ..GGVGA | ..NS   | GI | IYLMG  | ..G  | ..T  | ..  |
| UniRef100_A0A1R1D2Q5 | .....TL | ..A | RAMA | ..LS  | NLITIHVK  | .....H | ..YI | G | ..... | RLSPICG  | ..SG | IA | ..GGVGA | ..GS   | GI | VYLMG  | ..G  | ..T  | ..  |
| UniRef100_A0A1R1GJC3 | .....TL | ..A | RAMA | ..LS  | NLITIHVK  | .....H | ..YI | G | ..... | RLSPICG  | ..SG | IA | ..GGVGA | ..GS   | GI | VYLMG  | ..G  | ..T  | ..  |
| UniRef100_A0A1R3ED69 | .....QL | ..A | RALI | ..MS  | HLGAIYIK  | .....S | ..YY | P | ..... | PLSAFCG  | ..N  | TV | ..TSAAA | ..AM   | AV | YLLAK  | ..G  | ..S  | ..  |
| UniRef100_A0A1R4B6E8 | .....QT | ..Q | LALV | ..LT  | NLMAIYIK  | .....A | ..QQ | H | ..... | KLSALCG  | ..A  | TT | ..AGMGA | ..TAG  | I  | TYLLG  | ..G  | ..D  | ..  |
| UniRef100_A0A1R4I9H4 | .....QR | ..I | RALT | ..LS  | HLTALYIH  | .....A | ..SL | P | ..... | VLSAFCA  | ..A  | AT | ..AGMGS | ..AAG  | V  | AYLLD  | ..G  | ..R  | ..  |
| UniRef100_A0A1S1H5C3 | .....QL | ..A | RALM | ..LS  | HLMAIYIH  | .....N | ..QL | P | ..... | ALSALCA  | ..A  | TT | ..AAMGA | ..AAG  | I  | AWLLS  | ..G  | ..SR | ..  |
| UniRef100_A0A1S1X543 | .....TL | ..V | RALA | ..LS  | HLIAVYIH  | .....I | ..RL | P | ..... | KLSALCA  | ..V  | TT | ..ASMGA | ..GAG  | M  | AYLLD  | ..G  | ..S  | ..  |
| UniRef100_A0A1S1YUP3 | .....KM | ..Y | RALF | ..MS  | HLTIVHVK  | .....T | ..NV | G | ..... | RLSAYCG  | ..A  | MT | ..ASAAV | ..SG   | T  | LVFLE  | ..G  | ..   | ..  |
| UniRef100_A0A1S2RI28 | .....KM | ..I | RAVA | ..LS  | HLTITHIK  | .....S | ..KF | G | ..... | RLSALCG  | ..V  | TA | ..AGMGA | ..SAA  | I  | VYLLD  | ..G  | ..GL | ..  |
| UniRef100_A0A1S6HL04 | .....LL | ..A | RALI | ..MS  | HLGAIYIK  | .....S | ..YY | P | ..... | PLSAFCG  | ..N  | TV | ..TSAAA | ..AM   | AV | YLLAG  | ..G  | ..N  | ..  |
| UniRef100_A0A1S8T8R1 | .....KL | ..Y | RALV | ..VSN | LVTIHQK   | .....T | ..GI | G | ..... | RLSAYCG  | ..A  | IS | ..AGTGS | ..GAG  | I  | AYLH   | ..C  | ..   | ..  |
| UniRef100_A0A1S9BSA6 | .....KR | ..M | RALL | ..IS  | NLVSIYIK  | .....H | ..YI | G | ..... | ALSFCG   | ..A  | VS | ..ASCSA | ..GAA  | I  | TYMS   | ..G  | ..   | ..  |
| UniRef100_A0A1S9BSQ4 | .....VL | ..Y | RALI | ..VSN | LIAIHEK   | .....T | ..GI | G | ..... | RLSAYCG  | ..A  | VS | ..AGCAA | ..GC   | GI | AYLY   | ..G  | ..   | ..  |
| UniRef100_A0A1T0AV8  | .....QR | ..I | RALF | ..LA  | HLMAIYIH  | .....S | ..KL | P | ..... | KLSALCA  | ..V  | TT | ..AAMGS | ..CAG  | V  | AWLLT  | ..G  | ..K  | ..  |
| UniRef100_A0A1T4LAU6 | .....EL | ..Y | RALV | ..VSN | LVTIHLK   | .....T | ..GI | G | ..... | RLSAYCG  | ..V  | VC | ..AAVAS | ..FAG  | I  | AYLN   | ..H  | ..   | ..  |
| UniRef100_A0A1T4PB84 | .....KL | ..A | RALA | ..FS  | HLTAYIK   | .....T | ..FI | G | ..... | KLSPTICG | ..CA | VA | ..AGIGA | ..CAA  | I  | TYVLLG | ..G  | ..NS | ..  |
| UniRef100_A0A1T4QX93 | .....SL | ..I | RALF | ..VSH | HLTTHIK   | .....T | ..NV | G | ..... | RLSAYCG  | ..A  | TC | ..AAGVA | ..AAAL | T  | FLN    | ..D  | ..   | ..  |
| UniRef100_A0A1T4URX3 | .....QL | ..I | RGLM | ..VSH | HLMAIYIK  | .....S | ..HQ | N | ..... | KLSALCG  | ..A  | TT | ..ASMGA | ..VAG  | M  | TWLLG  | ..G  | ..N  | ..  |
| UniRef100_A0A1T4WZ02 | .....RL | ..T | RALI | ..LS  | HLTSIHLK  | .....H | ..NL | G | ..... | RLSALCG  | ..A  | TV | ..AGTAS | ..AC   | GI | VYLLG  | ..G  | ..S  | ..  |
| UniRef100_A0A1T4XKQ0 | .....KL | ..S | RALA | ..LS  | HLITVYIK  | .....E | ..YT | G | ..... | RLSPVCG  | ..CG | IA | ..AGVGA | ..CAS  | V  | AWLLI  | ..G  | ..DD | ..  |
| UniRef100_A0A1T4XUV8 | .....TL | ..C | RALA | ..LS  | NLIAIHEK  | .....A | ..GI | G | ..... | RLSAYCG  | ..A  | VS | ..AGCAA | ..GC   | GI | AYLLG  | ..G  | ..   | ..  |
| UniRef100_A0A1T5DJJ1 | .....KL | ..T | RALV | ..LAS | LISYIYIK  | .....S | ..NM | K | ..... | RLSALCG  | ..A  | MT | ..AGASA | ..SC   | GM | TYLLG  | ..G  | ..N  | ..  |
| UniRef100_A0A1T5E6Y2 | .....TM | ..L | RALL | ..VSN | LISVHIK   | .....Y | ..GI | G | ..... | ALSFCG   | ..A  | VS | ..AGCAA | ..GC   | GI | AFLY   | ..G  | ..   | ..  |
| UniRef100_A0A1T5JEM8 | .....EL | ..T | RALV | ..LS  | HLTAIYIK  | .....Q | ..SL | G | ..... | RLSCLCG  | ..C  | VV | ..ASTGS | ..SC   | GI | TYLMG  | ..G  | ..G  | ..  |
| UniRef100_A0A1T5M617 | .....KI | ..T | RALA | ..LG  | QLINVIYIK | .....N | ..HT | G | ..... | ALSAMCG  | ..CG | IA | ..AGIGA | ..SC   | GI | VMMG   | ..G  | ..S  | ..  |
| UniRef100_A0A1T5MAJ7 | .....KM | ..Y | RALV | ..LA  | NLISIHQK  | .....T | ..GI | G | ..... | RLSAYCG  | ..A  | VS | ..AACGS | ..GT   | GI | TYLE   | ..D  | ..   | ..  |
| UniRef100_A0A1U7JGC7 | .....RL | ..A | RALC | ..LS  | HIGAGYIK  | .....S | ..YY | P | ..... | PLSAYCG  | ..NS | AT | ..CAAGA | ..SAA  | M  | VYLLG  | ..G  | ..S  | ..  |
| UniRef100_A0A1U7M6Z4 | .....KL | ..A | RVLA | ..FS  | HLTAYIK   | .....I | ..FT | G | ..... | GLSPVCG  | ..CA | VA | ..AGIGA | ..SAA  | I  | TWLLG  | ..G  | ..TI | ..  |
| UniRef100_A0A1U9NH09 | .....EA | ..L | KAVA | ..LS  | HLVTGYIK  | .....S | ..HT | G | ..... | RLSAVCG  | ..CS | IA | ..AGAGA | ..SAA  | I  | TYLMG  | ..G  | ..N  | ..  |
| UniRef100_A0A1V1HYA7 | .....KL | ..A | KALA | ..IS  | HLVTAYVK  | .....N | ..YT | G | ..... | RLSAVCG  | ..CG | VA | ..ASTGA | ..TAG  | I  | TWLMG  | ..G  | ..DI | ..  |
| UniRef100_A0A1V2BE83 | .....QL | ..T | RALA | ..LS  | HLVAIYIH  | .....S | ..KL | P | ..... | RLSALCA  | ..T  | TT | ..AAMGT | ..AAG  | I  | IWLMG  | ..G  | ..S  | ..  |
| UniRef100_A0A1V31785 |         |     |      |       |           |        |      |   |       |          |      |    |         |        |    |        |      |      |     |

UniRef100\_A0A1W1ZA37 . . . . . T L . . Y R A L V . . . L T N L L S L H Q K . . . . . R . . . . Y I G . . . . . N L S A Y C G . . . A . V S . . . A G A A A . A C G I A Y L N . . . G . . .  
UniRef100\_A0A1W9T4P7 . . . . . K L . . V R A L A . . . F S H L V T I Y I K . . . . . E . . . . F T G . . . . . S L S P I C G . . . C A I A . . A G I G A . S V A V A W L L G . . C N D . .  
UniRef100\_A0A1W9V6F9 . . . . . Q L . . I R A L I . . . L S H L T S I H I K . . . . . S . . . . S M N . . . . . R L T A L C G . . . A . S V . . A A T G A . S C A I Y V L L G . . G Q . .  
UniRef100\_A0A1W9WF36 . . . . . L L . . I K S V A . . . L S Y L V T C Y I K . . . . . T . . . . L A G . . . . . R I G P L C G . . . S A V A . . G G A G A . A A G V T Y L L G . . G T . .  
UniRef100\_A0A1W9XB23 . . . . . K I . . I Q S I A . . . L S H L I N S Y I K . . . . . C . . . . F T G . . . . . D L S P L C G . . . C A I A . . A G V G A . A V A I V Y Q Q K . . G K . .  
UniRef100\_A0A1X3RMC3 . . . . . E L . . I R A L A . . . L S H L V A I S V H . . . . . S . . . . R Y T . . . . . R L S A L C A . . A . S T . . A A M G A . A A G M A W L F T . . Q D . .  
UniRef100\_A0A1X7AQC7 . . . . . Q L . . T R A L I . . . I S H L T A I H I K . . . . . S . . . . H L N . . . . . T L S A L C A . . A . T T . . A A A G A . S A A I V W L L G . . G D . .  
UniRef100\_A0A1X7EL00 . . . . . Q L . . I R S L I . . . M S H L T A I H L K . . . . . H . . . . S L G . . . . . R L S A L C G . . . A . S L . . A A T A A . G C G I T L L L G . . G G . .  
UniRef100\_A0A1X7KM00 . . . . . E I . . A E A I A . . . F S H L S T S F T K . . . . . S . . . . R M G . . . . . R L S P V C G . . . C A V A . . A G A G A . A A G I V H L L G . . G S . .  
UniRef100\_A0A1Y3QXR2 . . . . . Q T . . I R A L V . . . L S H L T V I Y I K . . . . . Q . . . . S L G . . . . . R L S A L C G . . . C . V V . . A A T G S . S C G I T Y L M G . . G D . .  
UniRef100\_A0A1Y3RRP8 . . . . . R M . . Y R A L A . . . V S D L C T I H Q K . . . . . T . . . . Y I G . . . . . R L S A F C G . . . A . V S . . A G A G A . G A G I C Y L L . . G . . .  
UniRef100\_A0A1Y3RX83 . . . . . A T . . V K A L A . . . F S H M L N V Y I K . . . . . L . . . . F T G . . . . . K L S A T C G . . . C G V A . . A A A S . S A A M V W L M G . . G N . .  
UniRef100\_A0A1Y3SMD1 . . . . . R M . . Y R A L V . . . V S N L L T V H Q K . . . . . T . . . . N L G . . . . . R L S A F C G . . . A . V N . . A A C A A . A A A I A Y L D . . G . . .  
UniRef100\_A0A1Y3SQP2 . . . . . T L . . I R A L V . . . V S N L V T I H L K . . . . . S . . . . G I G . . . . . T L S A Y C G . . . A . I S . . A G C G A . G A G I T Y L Y . . G . . .  
UniRef100\_A0A1Y3TK97 . . . . . T L . . C R A L A . . . L S N L V A I H E K . . . . . T . . . . G I G . . . . . T L S A Y C G . . . A . V S . . A G A G A . G A G I A Y L C . . G . . .  
UniRef100\_A0A1Y3U0C8 . . . . . K L . . Y R A L A . . . V S N L I A I H E K . . . . . S . . . . G I G . . . . . R L S A Y C G . . . A . V S . . A G C A A . G C G I A Y L C . . G . . .  
UniRef100\_A0A1Y3VGJ2 . . . . . Q T . . I R A L T . . . L S H L T V V Y I K . . . . . Q . . . . S L G . . . . . R L S A L C G . . . C . V V . . A A T G S . S C G I T Y L M G . . G D . .  
UniRef100\_A0A1Y3WJ31 . . . . . R L . . Y R A L A . . . V S N L I A I H E K . . . . . S . . . . G I G . . . . . R L S A Y C G . . . A . V S . . A G C A A . G C G I A Y L Q . . G . . .  
UniRef100\_A0A1Y3WTJ9 . . . . . K L . . L R A A A . . . L S Y L V C M Y I K . . . . . E . . . . Y S G . . . . . K L S A F C G . . . C A I A . . A G T G M . A C G L V L L R D . . G D A . .  
UniRef100\_A0A1Y3XW41 . . . . . R L . . L R A L A . . . L S D L V A I H V K . . . . . T . . . . Y I G . . . . . A L S A F C G . . . A . V C . . A A C G A . G A A I T W M S . . G . . .  
UniRef100\_A0A1Y3YK88 . . . . . R M . . Y R A M V . . . V S N L L T V H Q K . . . . . S . . . . N L G . . . . . R L S A F C G . . . A . V N . . A A C A A . A A A I A Y L D . . G . . .  
UniRef100\_A0A1Y4AGU1 . . . . . R L . . L R A L A . . . V S D L T A V H L K . . . . . S . . . . Y I G . . . . . S L S A F C G . . . V . V C . . A A A G A . G A A I C W M D . . G . . .  
UniRef100\_A0A1Y4AKU3 . . . . . Q T . . I R A L V . . . L S H L T V I Y I K . . . . . Q . . . . S L G . . . . . R L S A L C G . . . C . V V . . A A T G S . S C G I T Y L M G . . G S . .  
UniRef100\_A0A1Y4B7K2 . . . . . E I . . Y R A L C . . . V S N L V A I H Q K . . . . . R . . . . Y I G . . . . . S L S A Y C G . . . A . V C . . A A A G A . G A G I T Y L H . . G . . .  
UniRef100\_A0A1Y4BR86 . . . . . E L . . L R A L V . . . V S N L V T I H L K . . . . . T . . . . G I G . . . . . R L S A Y C G . . . A . T S . . A G A G A . A A G I T Y L Y . . G . . .  
UniRef100\_A0A1Y4CAT4 . . . . . Q T . . A V A L A . . . I S S M I T I Y I K . . . . . G . . . . Y I K . . . . . R M T A F C G . . . C G V A . . A A T G M . A A A V T Y L L G . . G G Y . .  
UniRef100\_A0A1Y4CBR2 . . . . . N L . . A R A L T . . . L S H L I A I H I K . . . . . G . . . . Y L G . . . . . K L S A L C G . . . C . V I . . A S T G S . S C G L V L L N G . . G G . .  
UniRef100\_A0A1Y4DE51 . . . . . T I . . L K S I A . . . L S H L L N G Y V V K . . . . . V . . . . F T G . . . . . E L A P I C G . . . C A I A . . A G V G A . S A A I V Y Q Q R . . G K . .  
UniRef100\_A0A1Y4EB47 . . . . . R L . . L C A L A . . . V S D L T A V H L K . . . . . S . . . . Y I G . . . . . S L S A F C G . . . V . V C . . A A A G A . G A G I A W M E . . G . . .  
UniRef100\_A0A1Y4GD89 . . . . . L T . . Y R A L A . . . L A N L L A V H Q K . . . . . K . . . . Y I G . . . . . R L S A Y C G . . . V . V S . . A A A A S . A C G V A Y M L . . L R G R . .  
UniRef100\_A0A1Y4GPW5 . . . . . E I . . A K A I A . . . V S H L A T S F V K . . . . . R . . . . N L G . . . . . R L S P V C G . . . C S V A . . A G A G A . A A G M T Y L M G . . G N . .  
UniRef100\_A0A1Y4HBY4 . . . . . K L . . Y R A L T . . . L S N L V A I H Q K . . . . . T . . . . G I G . . . . . R L S A Y C G . . . A . V C . . A G A A A . G A G I A Y L Y . . G . . .  
UniRef100\_A0A1Y4HFY2 . . . . . R L . . H R A L L . . . L S N L L T I H M K . . . . . T . . . . G I G . . . . . R L S A Y C G . . . A . V S . . A G C A A . G A A I A W L C . . G . . .  
UniRef100\_A0A1Y4HL73 . . . . . G L . . L R A L A . . . L S D L V A V H V K . . . . . S . . . . Y I G . . . . . A L S A F C G . . . V . V C . . A A C G A . G A A I T W M A . . G . . .  
UniRef100\_A0A1Y4I7G9 . . . . . R L . . Y R A L L . . . L S N L L A I H Q K . . . . . S . . . . G I G . . . . . K L S A F C G . . . A V . C . . A T C A S . G A A I C Y L Q . . T . . .  
UniRef100\_A0A1Y4IMH5 . . . . . R L . . Y R A L L . . . V S N L V A I H Q K . . . . . T . . . . G M G . . . . . R L S A Y C G . . . A . V S . . A G C G A . G C G I A Y L Q . . G . . .  
UniRef100\_A0A1Y4J1U9 . . . . . E L . . Y R A L V . . . V S N L V T I H L K . . . . . T . . . . G I G . . . . . S L S A Y C G . . . A . T A . . A G C G A . G A G V C Y L H . . G . . .  
UniRef100\_A0A1Y4K8B3 . . . . . E L . . L R A L V . . . V S N L V S I H L K . . . . . T . . . . G I G . . . . . K L S A Y C G . . . A . T S . . A G A G A . A A G I T Y L Y . . G . . .  
UniRef100\_A0A1Y4KX19 . . . . . K L . . L R A T T . . . L S F L I T T Y I K . . . . . E . . . . Y S G . . . . . K L S A F C G . . . C G I A . . A G T G M . A C G L A Y L K G . . G M . .  
UniRef100\_A0A1Y4L2N8 . . . . . M M . . L A R A V . . . V S N L I T I H L K . . . . . T . . . . G I G . . . . . R L S A Y C G . . . A . I S . . A G C G A . G A G I C Y L Y . . G . . .  
UniRef100\_A0A1Y4LE84 . . . . . K L . . I Q A V T . . . L S D L L T I H L K . . . . . T . . . . G I G . . . . . R L S A Y C G . . . A . V S . . A G C A A . G S A I A C L Q . . G . . .  
UniRef100\_A0A1Y4LNF7 . . . . . E L . . Y R A L T . . . L S N L I T L H A K . . . . . E . . . . G I G . . . . . R L S A Y C G . . . A . V S . . A G A G A . G A G I A W L H . . G . . .  
UniRef100\_A0A1Y4N2U3 . . . . . T L . . Y R A L C . . . I S N L T A I H I K . . . . . S . . . . R M G . . . . . R L S A F C G . . . A . V S . . A A A G A . G A A I Y V L K . . G . . .  
UniRef100\_A0A1Y4NQE2 . . . . . E L . . Y R A L V . . . L S N L V A I H E K . . . . . T . . . . G I G . . . . . T L S A Y C G . . . A . V S . . A G A G A . G A G I V Y L C . . G . . .  
UniRef100\_A0A1Y4QRC3 . . . . . K L . . Y R A L V . . . L A N L I A I H Q K . . . . . S . . . . G M G . . . . . R L S A Y C G . . . A . V S . . A G C A A . G C G I A Y L Y . . G . . .  
UniRef100\_A0A1Y4RAY4 . . . . . S L . . L R G I A . . . M S Y L V A I S I I . . . . . H . . . . R I G . . . . . K S P S M C S . . . C E V A . . A A L G I . S A G A T L M R N . . G T Y . .  
UniRef100\_A0A1Y4RFN6 . . . . . K K . . Y R A L A . . . L S N L T A I H Q K . . . . . T . . . . P I G . . . . . R L S A F C G . . . A . V S . . A G A G A . G A G I A Y L N . . G . . .  
UniRef100\_A0A1Y4SX17 . . . . . E L . . Y R A L I . . . V S N L C T I H Q K . . . . . R . . . . G I G . . . . . R L S A Y C G . . . A . V S . . A G I G A . G C G I A Y L L . . G . . .  
UniRef100\_A0A1Y4U252 . . . . . E L . . L R A L C . . . V S N L T A Q D Q K . . . . . T . . . . Y I G . . . . . P L S A Y C G . . . A . V C . . A A A G A . G A G I T F L C . . G . . .  
UniRef100\_A0A1Y4VZE6 . . . . . E L . . Y R A L I . . . V S N L C T I H Q K . . . . . T . . . . G I G . . . . . R L S A Y C G . . . A . V S . . A G I G A . G C G I A Y L L . . G . . .  
UniRef100\_A0A1Y4W9A0 . . . . . K M . . Y R A L V . . . L S N L L A I H Q K . . . . . T . . . . R I G . . . . . R L S A Y C G . . . V . T T . . A G T A A . G C G I A Y L Q . . D . . .  
UniRef100\_A0A1Y4WC44 . . . . . A T . . E K A L A . . . F S H L N V N Y I K . . . . . I . . . . F T G . . . . . K L S A T C G . . . C G V S . . A A A A . S A A M V W L L G . . G D . .  
UniRef100\_A0A1Y6L153 . . . . . Q L . . I R A L M . . . L S H L M A I Y I K . . . . . S . . . . Y Q N . . . . . K L S A L C G . . . A . T T . . A S M G A . V A G M T W L L G . . G D . .  
UniRef100\_A0A209B183 . . . . . I L . . A R A L A . . . L A H L A I S I T H . . . . . M . . . . R Y T . . . . . R L S A L C A . . A . S T . . A A M G A . A A G M S W L L T . . K N . .  
UniRef100\_A0A212J279 . . . . . K L . . Y R A L L . . . I S N L V A I H N K . . . . . S . . . . G I G . . . . . R L S A Y C G . . . A . V S . . A A C G S . G A A I T W M H . . G . . .  
UniRef100\_A0A212J3C8 . . . . . R T . . V R A L A . . . I A S L V T V A I K . . . . . A . . . . H T G . . . . . K L T A F C G . . . C A I A . . P A T G L . A A A A Y I L M G . . G D A . .  
UniRef100\_A0A212JD56 . . . . . S L . . I R A L I . . . L S H L T V V Y I K . . . . . Q . . . . K L G . . . . . R L S A L C G . . . C . V A . . A A T G A . S C G I T Y L M G . . G D . .  
UniRef100\_A0A212KAX4 . . . . . A L . . A R A L I . . . M S H L T S I H V K . . . . . H . . . . R L G . . . . . R L S A L C G . . . A . T V . . A S M A S . A C G I V M L L G . . G G . .  
UniRef100\_A0A226BWM1 . . . . . Q L . . L K A R A . . . I A I I L T N Y I K . . . . . H . . . . H I G . . . . . N L S A I C G . . . G A V A . . A S I G A . S A G I A Y L L K . . G S T . .  
UniRef100\_A0A239JB37 . . . . . D A . . L R A I G . . . L S H I V T A S V K . . . . . A . . . . H T G . . . . . R L S A V C G . . . C S V A . . A G A G A . T A G I A A L M G . . G S . .  
UniRef100\_A0A239G347 . . . . . K M . . Y R A L V . . . L A N L I T I H Q K . . . . . T . . . . G I G . . . . . R L S A Y C G . . . A . V S . . A A C G S . G T G I T Y L E . . G . . .  
UniRef100\_A0A239ITT9 . . . . . K L . . A K A L A . . . M S H M M N S Y I K . . . . . H . . . . Y I G . . . . . R L S A L C G . . . C G V A . . A G T G A . G V A I V W L M G . . G K M . .  
UniRef100\_A0A239RJY8 . . . . . E L . . I R A L T . . . L S H L T A I Y I K . . . . . Q . . . . S L G . . . . . T L S A L C G . . . C . V V . . A S I G S . S C G I T Y L M G . . G N . .  
UniRef100\_A0A239TM99 . . . . . K M . . Y R A L A . . . V S N L L A I H Q K . . . . . K . . . . Y I G . . . . . N L S A F C G . . . A . V S . . A S Y A C . S A A I T Y M L . . G . . .  
UniRef100\_A0A242V4A8 . . . . . Q L . . A R A L I . . . M S H L G A I Y I K . . . . . S . . . . Y P P . . . . . P L S A F C G . . . N . T T . . T S A A A . S M A L V Y L A G . . G T . .  
UniRef100\_A0A254VKQ7 . . . . . Q L . . T R A L M . . . L S H L M A V Y I H . . . . . A . . . . R L P . . . . . K L S A L C A . . V . T T . . A S M G A . A A G M G L L L G . . G G . .  
UniRef100\_A0A255TJW7 . . . . . E L . . I R A L T . . . L S H L T A I Y I K . . . . . Q . . . . S L G . . . . . K L S A L C G . . . C . V V . . A S I G S . S C G I T Y L M G . . G D . .  
UniRef100\_A0A256C0N1 . . . . . D R . . I R A Q T . . . L S H L V A I Y I H . . . . . N . . . . T F P . . . . . S L S A L C A . . T . S T . . A S M G A . A A G M A W L L G D H K . .  
UniRef100\_A0A257UFP3 . . . . . R I . . E E A L A . . . L A C I V T S G V T . . . . . Y . . . . H L G . . . . . S L S A M C G . . . S A I A . . G G I G V . A A A L V L L E G . . G G . .  
UniRef100\_A0A259UK57 . . . . . E L . . T R A L M . . . L S H M M A I Y I H . . . . . D . . . . K L P . . . . . R L S A L C A . . V . T T . . A S M G A . A A G M A W L L K . . G N . .  
UniRef100\_A0A259UK99 . . . . . Q L . . L R A V A . . . L S H L V T I V V K . . . . . I . . . . Y T G . . . . . S L S A L C G . . . C A V A . . A A T A A . T A A I T W L M G . . G N . .  
UniRef100\_A0A264YA23 . . . . . E Q . . I R A L I . . . L S H L T A I Y I K . . . . . Q . . . . N L G . . . . . K L S A L C G . . . C . V V . . A S I G S . S C G I T Y L M G . . G D . .  
UniRef100\_A0A265Q339 . . . . . K L . . L K A V F . . . F A H V V N K Y I K . . . . . L . . . . Y T G . . . . . K L S A M C G . . . C A I A . . A G V G A . S V G I T W M L G . . G N D . .  
UniRef100\_A0A265Q6G2 . . . . . D L . . V K A L A . . . I S H I I T S V V K . . . . . R . . . . Y I G . . . . . R L S N I C G . . . C S I A . . A S I G S . G A A I A W L L G . . D K N . .  
UniRef100\_A0A267MKY3 . . . . . K L . . A K A V A . . . I S H V I N S Y V K . . . . . H . . . . Y I G . . . . . R L S A L C G . . . C A V A . . A S T G A . G V A I G W L M G . . A N H . .  
UniRef100\_A0A291TB67 . . . . . K L . . Y R A L I . . . I S N L V A I H E K . . . . . T . . . . G I G . . . . . T L S A Y C G . . . A . V S . . A G A G A . G A G I V Y L C . . G . . .  
UniRef100\_A0A2A5JYP0 . . . . . K L . . V R A V T . . . F S H L L A I W I K . . . . . T . . . . K F G . . . . . R L S A L C G . . . V . T V . . A G A S A . A A A I T Y L F D . . G D L . .  
UniRef100\_A0A2A5QBH2 . . . . . Q L . . A R A L M . . . L S H L M A I Y I H . . . . . N . . . . Q L P . . . . . A L S A L C A . . A . T T . . A A M G A . A A G I A W L L E . . S R . .  
UniRef100\_A0A2C5T5X0 . . . . . Q L . . I R A L T . . . L S H L M A I Y I H . . . . . S . . . . Q F P . . . . . P L S A L C A . . A . T T . . A S M G A . A A G I A W L F E . . G K . .  
UniRef100\_A0A2C6DCR8 . . . . . K L . . A R A L M . . . L S H L M A I Y I H . . . . . T . . . . K L P . . . . . K L S A L C A . . A . T T . . A S M G A . A A G M A W L L S . . D R . .  
UniRef100\_A0A2C6DRU7 . . . . . E R . . Y R A L L . . . L S N L I A L Y E K . . . . . S . . . . Y I G . . . . . K L S A Y C G . . . V . V C . . A A S G S . A A G I T L L R . . K . . .  
UniRef100\_A0A2C9PBN0 . . . . . T M . . I R A L M . . . L S H L M A V Y I K . . . . . S . . . . Y Q H . . . . . K L S A L C G . . . A . T T . . A S M G A . A A G M T W L L G . . G N . .  
UniRef100\_A0A2D3W7E5 . . . . . K L . . L R A L F . . . F S H L A T V H V K . . . . . T . . . . N I G . . . . . R L S A Y C G . . . V . T C . . A A S A V . A G A L A F I N . . D . . .  
UniRef100\_A0A2G2MFD4 . . . . . K I . . S K A L A . . . I S H T I N C V I K . . . . . N . . . . H I G . . . . . S L S A L C S . . . C G I S . . A A T G A . S A A I T W L K N . . G S K . .  
UniRef100\_A0A2G6B8X6 . . . . . K K . . A R A V A . . . I S H L I N A Y V K . . . . . S . . . . Y M G . . . . . K L S P V C G . . . C A V S . . A G L G C . A A G I T Y L I G . . G T M . .  
UniRef100\_A0A2G6E433 . . . . . D I . . L K S V A . . . L S H L L N S Y I K . . . . . C . . . . Y I G . . . . . D L S P V C G . . . C A I A . . A G V G A . T A A I V Y Q L A . . G K . .  
UniRef100\_A0A2G6HZA5 . . . . . T L . . I R A L L . . . I S N L T I H Q K . . . . . T . . . . S I G . . . . . R L S A F C G . . . V . V S . . A G V G A . G A G I T W L N . . G . . .  
UniRef100\_A0A2G6K886 . . . . . L L . . L R A A A . . . L S S L I T V V V K . . . . . S . . . . F M G . . . . . V L T P V C G . . . G S V A . . A G L G A . A C A I T Y L F G . . G D . .  
UniRef100\_A0A2G6M529 . . . . . E I . . A E A L A . . . F S H L S T S F V K . . . . . S . . . . R M G . . . . . R L S P V C G . . . C A V A . . A G A G A . A A G I T H L L G . . G S . .  
UniRef100\_A0A2G6MWA1 . . . . . K L . . A R A L I . . . M S H L T T I H L K . . . . . H . . . . Y L G . . . . . R L S A L C G . . . V . I L . . A A S G S . A C G I A M L L G . . G G . .  
UniRef100\_A0A2G6N232 . . . . . T L . . L R A L V . . . V S N L T I H Q K . . . . . T . . . . R I G . . . . . S L S A Y C G . . . A . I S . . A G A G A . G A G I A W L H . . G . . .  
UniRef100\_A0A2G6P3W9 . . . . . D L . . Y R A L L . . . V S N L V T I H Q K . . . . . T . . . . G I G . . . . . R L S A Y C G . . . A . I S . . A G V G A . G S G I A W L H . . G . . .  
UniRef100\_A0A2G6PSX3 . . . . . T L . . Y R A L L . . . V S N L V T V H Q K . . . . . T . . . . G I G . . . . . K L S A Y C G . . . A . I S . . A G V G A . G A G I T W L C . . G . . .  
UniRef100\_A0A2G6QN57 . . . . . K K . . L R A L A . . . L S N L L A I H Q K . . . . . T . . . . S V G . . . . . R L S A F C G . . . T . . A G . . A T T A A . V S A I T Y L K . . G . . .  
UniRef100\_A0A2H0ZBF8 . . . . . R M . . L K S V A . . . L S H L I N S Y I K . . . . . V . . . . F L G . . . . . E V S P I C G . . . C A V S . . A G V G A . S A A I V Y Q R K . . G K . .  
UniRef100\_A0A2H9P7L0 . . . . . R I . . A E A A L . . . L S H L V T K Y A S . . . . . L . . . . S S G . . . . . Y L S A I C G . . . C . T I K . . A G I G A . A A G V A Y L L G . . G D N . .  
UniRef100\_A0A2H9T779 . . . . . Q L . . I R A L T . . . L S H L T A I Y I K . . . . . S . . . . H L P . . . . . S L S A M C A . . T . T T . . A A M G S . A V S I T W L L G . . G D . .  
UniRef100\_A0A2I0PJ08 . . . . . K K . . I R A V T . . . L S N L V T I Y L K . . . . . S . . . . H L G . . . . . R L S A M C G . . . A . I I . . S S M G A . C C A I T F I L G . . G K K . .  
UniRef100\_A0A2I0QA36 . . . . . E L . . A R A L M . . . L S H L V T I H I K . . . . . G . . . . Q L G . . . . . R L S A L C G . . . A . V V . . A S I G S . A C G I V Y L A E . . G N . .  
UniRef100\_A0A2I1MB94 . . . . . T L . . A R G L F . . . F A H I I N R Y V K . . . . . E . . . . Y A G . . . . . K L S G L C G . . . C A I G . . A A I G S . C A A I A F M L G . . G G E . .  
UniRef100\_A0A2I5TF53 . . . . . K L . . A R A L T . . . L S H L M A I Y I H . . . . . S . . . . Q L P . . . . . T L S A L C A . . A . T T . . A S M G A . A A G M S W L L E . . P R . .  
UniRef100\_A0A2I7N9R7 . . . . . K M . . M R G L I . . . F S I L A S V H I K . . . . . N . . . . N I G . . . . . R L S A Y C G . . . P . M C . . A A G A V . S G A L V F L N . . D . . .  
UniRef100\_A0A2I8NM82 . . . . . K L . . A R A L M . . . L S H L S A I Y I H . . . . . Y . . . . Q L P . . . . . R L S A L C A . . A . T T . . A A M G A . A A G M A W L L D . . G G . .

UniRef100\_A0A2J6HXP9 . . . . . K L . . . Y R A L L . . . I A N L V T I H Q K . . . . . T . . . . . G I G . . . . . R L S A Y C G . . . A . I S . . . A G V G A . . . G A G I T W I C . . . G . . .  
UniRef100\_A0A2J6XEK0 . . . . . E V . . . I R A V T . . . L S H L L T I Y V K . . . . . S . . . . . Y T G . . . . . L L S P L C G . . . C G I A . . . A G V G C . . . S S G L T F L R E . . . K D . . .  
UniRef100\_A0A2J8B7A6 . . . . . A M . . . W R A L L . . . V S N L V T L H E K . . . . . E . . . . . G I G . . . . . R L S A Y C G . . . A . V S . . . A G A G A . . . G A G I A W L K . . . T . . .  
UniRef100\_A0A2K2TW32 . . . . . K L . . . Y R A L V . . . V S N L I A I H Q K . . . . . K . . . . . Y I G . . . . . S L S A Y C G . . . A . V S . . . A A C G A . . . G A A I T Y L Y . . . G . . .  
UniRef100\_A0A2K4ZDC0 . . . . . K L . . . Y R A L V . . . L S N L L A I H Q K . . . . . T . . . . . G I G . . . . . R L S A Y C G . . . A . V S . . . A G S A A . . . G A A I A Y L Y . . . G . . .  
UniRef100\_A0A2L2WL5 . . . . . E L . . . I R A L T . . . L S H L T A I Y I K . . . . . Q . . . . . S L G . . . . . T L S A L C G . . . C . V V . . . A G I G S . . . S C G I T Y L M G . . . G D . . .  
UniRef100\_A0A2L2WWP7 . . . . . E M . . . T R A L M . . . L S H L T A I Y I K . . . . . Q . . . . . N L G . . . . . S L S A L C G . . . C . V V . . . A A T G S . . . S C G I T Y L M G . . . G T . . .  
UniRef100\_A0A2M6ZWR1 . . . . . R L . . . L K S I L . . . L S H I V T R I I S . . . . . N . . . . . Y T G . . . . . D L S A L C G . . . C . F N K S A I . . . G A . . . A A G L T Y L L G . . . G K E . . .  
UniRef100\_A0A2M8H1P7 . . . . . Q T . . . L R A L I . . . L S H L M A I Y I K . . . . . K . . . . . Q Q N . . . . . K L S A L C G . . . A . T T . . . A A M G S . . . A A G I T Y L L G . . . G S . . .  
UniRef100\_A0A2M8RT13 . . . . . Q L . . . T R A L F . . . L S H L M A I Y I H . . . . . S . . . . . K L P . . . . . K L S A L C A . . . A . T T . . . A A M G S . . . C A G I A W L L G . . . G S . . .  
UniRef100\_A0A2M8S313 . . . . . K H . . . I R A L F . . . L S H L M A V F I H . . . . . S . . . . . K L P . . . . . K L S A L C A . . . V . T T . . . A A M G S . . . T A G V A W L L T . . . E K . . .  
UniRef100\_A0A2M8TGF1 . . . . . K L . . . Y R A L V . . . I S S L V T I H Q K . . . . . T . . . . . G I G . . . . . R L S A Y C G . . . A . V S . . . A G V G S . . . G A G I A Y L Y . . . G . . .  
UniRef100\_A0A2N1PL94 . . . . . E M . . . I R A L F . . . F S H L A A I H I K . . . . . T . . . . . N V G . . . . . R L S A H C G . . . A . V C . . . A A A L . . . G G A L A F V N . . . N . . .  
UniRef100\_A0A2N1QND6 . . . . . Q L . . . L R A I A . . . L S Y L L T I L M K . . . . . S . . . . . H I G . . . . . R L S A I C A . . . C A L A . . . A G I G V . . . A A G A S L L L G . . . G D V . . .  
UniRef100\_A0A2N1QTJ0 . . . . . D I . . . A K A L A . . . I S H I S T S F V K . . . . . R . . . . . R L G . . . . . R M S V V C G . . . C S V A . . . A G A G S . . . A A G M T Y L M G . . . G S . . .  
UniRef100\_A0A2N1SEJ3 . . . . . R L . . . I R A V T . . . L S N L I A I Y I K . . . . . S . . . . . R F G . . . . . K L S A L C G . . . A . T V . . . A A T G A . . . C A G I A Y L L G . . . G D L . . .  
UniRef100\_A0A2N1TGG1 . . . . . R V . . . M K A I A . . . L S H L V T A Y I K . . . . . A . . . . . H T G . . . . . R L S A L C G . . . C S V A . . . A G A G A . . . T A G I T Y L M G . . . G S . . .  
UniRef100\_A0A2N2A626 . . . . . A L . . . L R A L I . . . V S D L V T I H Q K . . . . . T . . . . . G I G . . . . . R L S A F C G . . . A . V C . . . A G C G A . . . G A G I A Y L E . . . G . . .  
UniRef100\_A0A2N2B390 . . . . . A L . . . A R A L I . . . L S H L V A I H I K . . . . . K . . . . . R L G . . . . . R L S A L C G . . . A . I A . . . A A I G S . . . G C G M T L L M G . . . G S . . .  
UniRef100\_A0A2N2CTS9 . . . . . K L . . . I R A V A . . . L S D L I A I H Q K . . . . . T . . . . . S I G . . . . . R L S A F C G . . . A . I S . . . A G C A A . . . G A G I A Y L N . . . G . . .  
UniRef100\_A0A2N2DQV4 . . . . . T L . . . L R A V A . . . L S D L I T I H Q K . . . . . S . . . . . S I G . . . . . R L S A F C G . . . A . V S . . . A G C S A . . . G A G I A Y L Q . . . G . . .  
UniRef100\_A0A2N2EHW0 . . . . . D L . . . A R A L I . . . L S H L V A I H I K . . . . . K . . . . . R L G . . . . . R L S A L C G . . . A . I A . . . A A I G S . . . G C G M T L L M G . . . G N . . .  
UniRef100\_A0A2N2EP56 . . . . . R I . . . L K S I A . . . V S H L V N S Y I K . . . . . V . . . . . F T G . . . . . E L A P I C G . . . C A V A . . . A G V G A . . . S V A I V W Q R A . . . G G . . .  
UniRef100\_A0A2N2FK02 . . . . . D A . . . L R A I G . . . L S H I V T A S V K . . . . . A . . . . . H T G . . . . . R L S A V C G . . . C S V A . . . A G A G A . . . T A G V A A L L G . . . G D . . .  
UniRef100\_A0A2N2GVW3 . . . . . K V . . . L Q S I A . . . L S H L V N S V V K . . . . . C . . . . . Y T G . . . . . S L S P L C G . . . C A I A . . . S G V G A . . . A V A I V F Q Q V . . . G A . . .  
UniRef100\_A0A2N2HC93 . . . . . K I . . . V R S I A . . . L S H L I N S Y I K . . . . . C . . . . . H T G . . . . . H L S P I C G . . . C A I A . . . A G V G A . . . A A A I V Y Q V A . . . G K . . .  
UniRef100\_A0A2N2IF24 . . . . . D V . . . L E A M A . . . L S H L V T A Y V K . . . . . A . . . . . H T G . . . . . R L S A I C G . . . C S V A . . . A G A G A . . . S A G V A Y L L G . . . G N . . .  
UniRef100\_A0A2N2LGF6 . . . . . K L . . . F R A L A . . . L G H L V S V H I K . . . . . N . . . . . K I G . . . . . V L S C L C G . . . C . L S . . . A A A G A . . . A C G I V Y L L D . . . G D . . .  
UniRef100\_A0A2N2VX69 . . . . . E L . . . A R A L V . . . L A H L V A I H I K . . . . . G . . . . . Y L G . . . . . K L S A L C G . . . C . V I . . . A T A G A . . . S C G I V Y L K G . . . G N . . .  
UniRef100\_A0A2N3I0V5 . . . . . K L . . . L R A L A . . . L A L L V T I Y M K . . . . . S . . . . . F V G . . . . . Q L S A L C G . . . V . L L . . . S T A G A . . . S C G I T Y I M G . . . G D . . .  
UniRef100\_A0A2N4UW80 . . . . . N L . . . A R A L I . . . I S H L T A I Y I K . . . . . S . . . . . F Y P . . . . . P L S G F C G . . . N . T V . . . T S G A A . . . S M A M V Y L A G . . . G T . . .  
UniRef100\_A0A2N5XTJ3 . . . . . Q L . . . A R A L I . . . L S H L G A I Y I K . . . . . S . . . . . Y Y P . . . . . S L S A F C G . . . N . T A . . . T S A A A . . . A M A I V Y L M G . . . G S . . .  
UniRef100\_A0A2N6BTV4 . . . . . R V . . . V E A I A . . . L S H L V T A Y I K . . . . . A . . . . . F T G . . . . . R L S A I C G . . . C S V A . . . A A A G A . . . A A G A T Y L L G . . . G N . . .  
UniRef100\_A0A2N6D3G7 . . . . . T V . . . L E A I A . . . L S H L V T A Y I K . . . . . A . . . . . H T G . . . . . R L S A I C G . . . C S V A . . . A G A G A . . . A A G I T Y M L G . . . G T . . .  
UniRef100\_A0A2N6D977 . . . . . T V . . . L E A I A . . . L S H L V T A Y I K . . . . . A . . . . . H T G . . . . . R L S A I C G . . . C S V A . . . A G A G A . . . A A G I T Y M L G . . . G T . . .  
UniRef100\_A0A2N6EIM4 . . . . . T L . . . L R A L L . . . V S N L V A I H Q K . . . . . T . . . . . G I G . . . . . R L S A Y C G . . . A . V S . . . A G C A A . . . G A G I S W L H . . . G . . .  
UniRef100\_A0A2N8ZD10 . . . . . H L . . . I R A L M . . . L S H L M A I Y I K . . . . . S . . . . . H Q N . . . . . K L S A L C G . . . V . T T . . . A S M G A . . . V S G M T W L L G . . . G T . . .  
UniRef100\_A0A2N8ZKM0 . . . . . K L . . . A R A L I . . . L S H L G A V Y I K . . . . . S . . . . . H Y P . . . . . P L C A F C G . . . N . T A . . . T S S A A . . . S M A M V Y L K G . . . G S . . .  
UniRef100\_A0A2P1TWB1 . . . . . M L . . . A R S I A . . . L S Y I I N I Y I K . . . . . E . . . . . Y S G . . . . . K L S A F C G . . . C A V A . . . A G T G A . . . S A G I C Y L L G . . . G G L . . .  
UniRef100\_A0A2P2BMT9 . . . . . R L . . . A K A L A . . . I S H L V T A Y I K . . . . . N . . . . . Y T G . . . . . R L S A V C G . . . C G V A . . . A S T G A . . . T A G L S W L M S . . . G D E . . .  
UniRef100\_A0A2P2FC67 . . . . . L I . . . L R A L V . . . L A N L I S V H Q K . . . . . K . . . . . Y I G . . . . . S L S A Y C G . . . A . T S . . . A A T G A . . . A C G V A Y M M . . . L R Q K . . .  
UniRef100\_A0A2P2FDS6 . . . . . K L . . . Y R A L V . . . L S N L I A I H Q K . . . . . T . . . . . G I G . . . . . R L S A Y C G . . . A . V S . . . A A G A A . . . A C G I A Y L L . . . G . . .  
UniRef100\_A0A2P2FE08 . . . . . Q L . . . I R A T T . . . V S D L L T I Y Q K . . . . . S . . . . . F I G . . . . . R L S A F C G . . . A . V S . . . A G A A A . . . A A G V C F L N . . . G . . .  
UniRef100\_A0A2P5GLH4 . . . . . K L . . . A R A L M . . . L S H L S A I Y I H . . . . . N . . . . . Q L P . . . . . K L S A L C A . . . A . T T . . . A S M C A . . . A A G M A W L A D . . . G R . . .  
UniRef100\_A0A2P7Q289 . . . . . R L . . . C K A L A . . . L S H I T T A Y I K . . . . . H . . . . . F T G . . . . . R L S A M C G . . . C G V A . . . A A T G A . . . T A G I A W L M D . . . E D I . . .  
UniRef100\_A0A2P8EH31 . . . . . K L . . . Y R A L L . . . V S N L V S Y I K . . . . . E . . . . . F I G . . . . . S L S A F C G . . . A . V S . . . A A C G A . . . G A A I T Y M A . . . G . . .  
UniRef100\_A0A2S0L2V7 . . . . . K L . . . I R A T A . . . L S Y L V C T Y I K . . . . . H . . . . . Y S G . . . . . K L S A F C G . . . C A I A . . . A G S G M . . . A S A L V Y L D G . . . G D T . . .  
UniRef100\_A0A2S2CIK9 . . . . . Q Q . . . I R A L M . . . L S H L M A I Y I K . . . . . S . . . . . H Q N . . . . . K L S A L C G . . . A . T T . . . A A M G A . . . V A G M T W L L G . . . G N . . .  
UniRef100\_A0A2S4QN42 . . . . . R L . . . A R A L M . . . L S H L S A I Y I H . . . . . S . . . . . Q L P . . . . . R L S A L C A . . . A . T T . . . A A M G A . . . A A G M T W L M D . . . G R . . .  
UniRef100\_A0A2S4WWF9 . . . . . K L . . . A R A L M . . . L S H L S A I Y I H . . . . . Y . . . . . Q L P . . . . . R L S A L C A . . . A . T T . . . A A M C A . . . A A G M A W L L D . . . G R . . .  
UniRef100\_A0A2S6HY69 . . . . . E L . . . Y R A L V . . . L S N L I A I Y Q K . . . . . Y . . . . . R M G . . . . . R L S A Y C G . . . A . V S . . . A A A G A . . . G A G I T Y I M . . . G . . .  
UniRef100\_A0A2T0BJ09 . . . . . K L . . . Y R A L V . . . I S D L V T I H Q K . . . . . T . . . . . G I G . . . . . R L S A Y C G . . . V . I C . . . A G A G S . . . G A G I A Y L Y . . . G . . .  
UniRef100\_A0A2T0BN10 . . . . . K I . . . V R S V A . . . L S H L V T I Y I K . . . . . S . . . . . Y T G . . . . . A L S P V C G . . . C G V A . . . A G V G A . . . S A G L S Y L T G . . . G N . . .  
UniRef100\_A0A2T2XZM9 . . . . . T L . . . A R A L A . . . L S H L T A I S I H . . . . . S . . . . . R Y T . . . . . R L S A L C A . . . A . S T . . . A A M G S . . . A A G M A W L F T . . . R D . . .  
UniRef100\_A0A2T3I2B3 . . . . . T A . . . V R A L M . . . M S H L M A I Y I K . . . . . S . . . . . Y Q N . . . . . K L S A L C G . . . A . T T . . . A S M G A . . . V A G M T W L L G . . . G Q . . .  
UniRef100\_A0A2T3JYD2 . . . . . Q I . . . A R A L I . . . M S H L G A I Y M K . . . . . S . . . . . F Y P . . . . . P L S P F C G . . . C . A V . . . T S S A A . . . S M A M T Y L Q G . . . G . . .  
UniRef100\_A0A2T3LD16 . . . . . K T . . . I R A L M . . . L S H L T A I Y I K . . . . . S . . . . . H Q N . . . . . K L S A L C G . . . A . T T . . . A S M G A . . . V A G M T W L L G . . . G D . . .  
UniRef100\_A0A2T3LKN5 . . . . . Q L . . . A R A L I . . . M S H L G A I Y M K . . . . . S . . . . . F Y P . . . . . P L S P F C G . . . N . A V . . . T S S A A . . . A M G M V Y L A G . . . G D . . .  
UniRef100\_A0A2T3N3A2 . . . . . K T . . . I R A L M . . . L S H L M A I Y I K . . . . . S . . . . . H Q N . . . . . K L S A L C G . . . A . T T . . . A S M G A . . . V A G M T W L L G . . . G D . . .  
UniRef100\_A0A2T3NL8R . . . . . T T . . . I R A L M . . . M S H L M A I Y I K . . . . . S . . . . . Y Q N . . . . . K L S A L C G . . . A . T T . . . A S M G A . . . V A G M T W L L G . . . G Q . . .  
UniRef100\_A0A2T3P069 . . . . . T T . . . T R A L M . . . M S H L M A I Y I K . . . . . S . . . . . Y Q N . . . . . K L S A L C G . . . A . T T . . . A S M G A . . . V A G M T W L L G . . . G N . . .  
UniRef100\_A0A2T4T7G6 . . . . . E L . . . I R A L T . . . L S H L T A I Y I K . . . . . Q . . . . . S L G . . . . . K L S A L C G . . . C . V V . . . A S I G S . . . S C G I T Y I M G . . . G D . . .  
UniRef100\_A0A2T5C8M1 . . . . . D L . . . I R A L F . . . L S H L C T V H I K . . . . . T . . . . . Q V G . . . . . R L S A Y C G . . . A . M C . . . A A A G V . . . S G A I S F L M . . . G . . .  
UniRef100\_A0A2U1E4Q5 . . . . . K L . . . M R A L V . . . F T N L I A I H Q K . . . . . R . . . . . Y I G . . . . . D L S A Y C G . . . A . V S . . . A A A A . . . C G G I A Y L Y . . . D . . .  
UniRef100\_A0A2U1FPB7 . . . . . R T . . . V R A L V . . . L S N L M V I Y I K . . . . . Q . . . . . K L G . . . . . R L S A L C G . . . C . V V . . . A A T G S . . . S C G I T Y L M G . . . G T . . .  
UniRef100\_A0A2U3BBY7 . . . . . K T . . . L R A L V . . . L S H M M A I Y I K . . . . . K . . . . . Q Q N . . . . . K L S A L C G . . . A . T T . . . A G M G A . . . A A G I T Y L L G . . . G N . . .  
UniRef100\_A0A2U8DPR2 . . . . . K L . . . Y R A L V . . . L T N L I S L H Q K . . . . . R . . . . . Y I G . . . . . N L S A Y C G . . . A . V S . . . A G T A A . . . A C G I A Y L N . . . G . . .  
UniRef100\_A0A2V1H4Z1 . . . . . Q L . . . T R A L I . . . L S H L S S I H I K . . . . . S . . . . . H L N . . . . . S L S A L C A . . . A . T T . . . A G T G S . . . S A A I A W L L G . . . K K . . .  
UniRef100\_A0A2V2C3K4 . . . . . E I . . . V R A A A . . . A A N L L T V F L K . . . . . T . . . . . R A G A D E G . . . R I A P V C G . . . A A L A . . . A G . . . G A . . . A A G G I A M L R G . . . D D . . .  
UniRef100\_A0A2V2DF95 . . . . . E L . . . Y R A L I . . . V S N L I A I H I K . . . . . S . . . . . G I G . . . . . P L S A F C G . . . A . V S . . . A G C A A . . . C G G I A W L M . . . G . . .  
UniRef100\_A0A2V2E3V3 . . . . . K V . . . L R A L A . . . L S I L V T I H T K . . . . . H . . . . . Y I G . . . . . R L S V L C G . . . C S I A . . . A S I G S . . . C C G I Y Y L F D . . . G S . . .  
UniRef100\_A0A2V2E4R8 . . . . . K M . . . L R A L A . . . V S D L I S I Y Q K . . . . . S . . . . . G I G . . . . . C L S A F C G . . . A . V S . . . A G A G A . . . A C G I A Y L L . . . G . . .  
UniRef100\_A0A2V2EJ75 . . . . . K T . . . I R A L V . . . A A N L I S I H Q K . . . . . R . . . . . F I G . . . . . L S A Y C G . . . A . T S . . . A A G S A . . . V C G I A Y L D . . . G . . .  
UniRef100\_A0A2V2ETK2 . . . . . Q L . . . L R A L A . . . L S D L V T I H L K . . . . . S . . . . . G I G . . . . . R L S A Y C G . . . A . V S . . . A G A G A . . . A A G I C F L Y . . . G . . .  
UniRef100\_A0A2V2FNF5 . . . . . Q L . . . Y R A L V . . . L S D L V T I H Q K . . . . . T . . . . . G I G . . . . . S V S A F C G . . . A . V C . . . A G V G A . . . G C G I A Y L Q . . . G . . .  
UniRef100\_A0A2V2FVB2 . . . . . A L . . . L R A L L . . . V S D L I T I H Q K . . . . . T . . . . . G I G . . . . . R L S A F C G . . . A . T S . . . A G V G A . . . A C G I A W L D . . . G . . .  
UniRef100\_A0A2V2GMP9 . . . . . K L . . . L R A L A . . . L S D L V T I H L K . . . . . T . . . . . G I G . . . . . R L S A Y C G . . . A . V S . . . A G V G A . . . G A G I E Y L R . . . G . . .  
UniRef100\_A0A2V4A5K8 . . . . . K L . . . L R G L A . . . L A L L T T I Y M K . . . . . S . . . . . F V G . . . . . Q L S A L C G . . . V . L L . . . S T A G A . . . G C G I T Y I M G . . . G D . . .  
UniRef100\_A0A2V4E5P6 . . . . . Q L . . . Y R A L I . . . L S N L I A L Y E K . . . . . S . . . . . Y I G . . . . . K L S A Y C G . . . V . V C . . . A A S G S . . . A A G I T F L M . . . N . . .  
UniRef100\_A0A2X2T0J3 . . . . . K L . . . A R A L M . . . L S H L S A I Y I H . . . . . Y . . . . . Q L P . . . . . R L S A L C A . . . A . T T . . . A S M G A . . . A A G M A W L V D . . . G H . . .  
UniRef100\_A0A2X4V7P6 . . . . . R L . . . A R A L M . . . L S H L S A I Y I H . . . . . N . . . . . Q L P . . . . . K L S A L C A . . . A . T T . . . A A M G A . . . A A G M T W L L D . . . G S . . .  
UniRef100\_A0A2Z4U933 . . . . . K I . . . R R A A A . . . L S I L F T I H T K . . . . . Q . . . . . Y L G . . . . . R L S V L C G . . . C S I A . . . A A M G V . . . G C G I I F M K D . . . G T . . .  
UniRef100\_A0A2Z4UBV8 . . . . . V L . . . L R A L L . . . V S N L V S I H L K . . . . . T . . . . . G I G . . . . . T L S A Y C G . . . A . I S . . . A G C G A . . . G A G I T Y L Y . . . G . . .  
UniRef100\_A0A2Z4W8H1 . . . . . T Q . . . I R A L A . . . L A N L I A I H I K . . . . . S . . . . . Y L G . . . . . R L S A L C G . . . C . V V . . . S A S G A . . . S A G I V Y L L G . . . G D . . .  
UniRef100\_A0A2Z5SEU7 . . . . . T I . . . L R S I A . . . L S H L V N A Y I K . . . . . C . . . . . H T G . . . . . D L A P I C G . . . C A I A . . . A G V G A . . . A A I V Y Q Q A . . . G P . . .  
UniRef100\_A0A2Z6AV01 . . . . . E R . . . Q R A I A . . . L S H V V T A Y V K . . . . . A . . . . . F T G . . . . . R L S A Y C G . . . C S V A . . . A G A G A . . . A A G V T L L L G . . . G G . . .  
UniRef100\_A0A2Z6IAJ8 . . . . . A R . . . L R A V L . . . L S D L V T I A L K . . . . . Q . . . . . G I G . . . . . K L S A Y C G . . . A . V S . . . A G C S G . . . G A G I A L L K . . . G . . .  
UniRef100\_A0A315QTM8 . . . . . E I . . . F K A T M . . . I A H L G H Y A K . . . . . I . . . . . Y L G . . . . . R L S A L C G . . . L F Y A . . . A A P G V . . . L A A L L Y L . . . A . . . G K E . . .  
UniRef100\_A0A315ZH44 . . . . . A M . . . Y R A L F . . . V S H L S T V H I K . . . . . T . . . . . N V G . . . . . R L S A Y C G . . . V . M T . . . A S A A V . . . S G A L T F L E . . . G . . .  
UniRef100\_A0A315ZYP5 . . . . . N L . . . L R A T A . . . L S Y L I C M Y I K . . . . . E . . . . . Y S G . . . . . K L S A F C G . . . C A I A . . . A G T G M . . . A C A L V Y L R G . . . G D V . . .  
UniRef100\_A0A315ZY15 . . . . . K V . . . C R A L I . . . L S N M V T I H Q K . . . . . T . . . . . G I G . . . . . R L S A Y C G . . . A . V S . . . A G A A A . . . G A G I A Y L N . . . G . . .  
UniRef100\_A0A316D413 . . . . . E I . . . A K A V A . . . I S H F L S G Y I K . . . . . Y . . . . . I V G . . . . . K L A P I C G . . . A F Y S . . . A G A A A . . . T A G I S Y L M N . . . K N . . .  
UniRef100\_A0A316MK44 . . . . . T T . . . L R A V A . . . L G H M V N I Y V K . . . . . S . . . . . Y I G . . . . . V L S P I C S . . . C G I A . . . A G L G A . . . S V A I V Y M L G . . . G S . . .  
UniRef100\_A0A316N2T0 . . . . . A L . . . A E A L A . . . L S H L V C G Y L K . . . . . A . . . . . Y T G . . . . . R L T P I C G . . . C S V A . . . A G A G A . . . A A G M A R L M G . . . A N . . .  
UniRef100\_A0A316NGP8 . . . . . C L . . . Q R A L A . . . L S Y L V A I A V I . . . . . R . . . . . R I G . . . . . K C P S M C S . . . C E V A . . . A S L G V . . . A A G N V L R L G . . . G T E . . .  
UniRef100\_A0A316NJU4 . . . . . K M . . . L R A L A . . . L S N L I S L H E K . . . . . R . . . . . Y I G . . . . . S L S A Y C G . . . A . T S . . . A A T G A . . . A C G I A Y M L . . . G . . .  
UniRef100\_A0A316NQW2 . . . . . R L . . . L R A T A . . . I S Y L V C M Y I K . . . . . E . . . . . F S G . . . . . K L S A F C G . . . C G I A . . . G G T G L . . . A C A L A Y L M G . . . G D E . . .  
UniRef100\_A0A316PL63 . . . . . M L . . . L R A L V . . . L A N L L S V H Q K . . . . . K . . . . . Y I G . . . . . S L S A Y C G . . . A . T S . . . A A C A A . . . G A A V C W M R . . . G . . .  
UniRef100\_A0A316PQ13 . . . . . R L . . . Y R A L L . . . V S D L V T I H Q K . . . . . T . . . . . G I G . . . . . R L S A Y C G . . . A . V S . . . A G C G A . . . G A G I A Y L L . . . G . . .  
UniRef100\_A0A316PQC6 . . . . . E L . . . Y R A L I . . . L A N L L G L H Q K . . . . . A . . . . . G I G . . . . . R L S A Y C G . . . A . V S . . . A G C A A . . . G A G I A F L M . . . H . . .  
UniRef100\_A0A316QLU6 . . . . . Q L . . . Y R A L L . . . I S N L C A I H Q K . . . . . S . . . . . G I G . . . . . A L S A Y C G . . . A . V S . . . A G A G A . . . G A G I A Y L R . . . G . . .  
UniRef100\_A0A316R9D7 . . . . . Q M . . . L R A L V . . . F A N L V P I H I K . . . . . K . . . . . R I G . . . . . P L S A L C G . . . I . V P . . . A S I G A . . . A C G I A F L K G . . . A T . . .  
UniRef100\_A0A316RJH4 . . . . . K M . . . L R A V A . . . L S N L V A I Y I K . . . . . S . . . . . K F G . . . . . R L S A L C G . . . A . T V . . . A G T G S . . . A C A I T Y L L G . . . G G L . . .



|                      |            |       |    |   |   |   |   |   |   |   |        |        |        |        |        |        |        |   |   |   |   |        |        |        |        |   |   |   |   |   |   |   |   |   |   |   |        |        |        |        |        |        |        |
|----------------------|------------|-------|----|---|---|---|---|---|---|---|--------|--------|--------|--------|--------|--------|--------|---|---|---|---|--------|--------|--------|--------|---|---|---|---|---|---|---|---|---|---|---|--------|--------|--------|--------|--------|--------|--------|
| UniRef100_A0A316RT04 | .....DL..A | RALV  | IS | D | L | V | M | H | I | K | .....E | .....Y | M      | G      | .....R | L      | S      | P | L | C | G | .....S | G      | I      | A      | G | G | T | G | A | C | C | G | M | T | Y | L      | Q      | G      | .....N | .....  |        |        |
| UniRef100_A0A316STM8 | .....EL..I | RGLM  | LS | H | L | T | V | I | Y | I | K      | .....Q | .....S | L      | G      | .....C | L      | S | A | L | C | G      | .....C | V      | V      | A | A | T | G | S | S | C | G | I | T | Y | L      | M      | G      | .....N | .....  |        |        |
| UniRef100_A0A318EHG9 | .....KL..L | RALC  | IS | N | L | I | A | I | Y | Q | K      | .....Y | .....Q | I      | G      | .....R | L      | S | A | Y | C | G      | .....A | V      | S      | A | A | A | G | A | G | A | G | I | A | Y | L      | Y      | .....G | .....  |        |        |        |
| UniRef100_A0A329HK89 | .....RL..R | ARALM | LS | H | L | S | A | I | Y | I | H      | .....Y | .....Q | L      | P      | .....R | L      | S | A | L | C | A      | .....T | I      | T      | A | S | M | G | A | A | G | M | A | W | L | L      | D      | .....R | .....  |        |        |        |
| UniRef100_A0A329TRM0 | .....LL..Y | RALL  | VS | N | L | V | T | I | H | L | K      | .....T | .....G | I      | G      | .....P | L      | S | A | Y | C | G      | .....A | T      | S      | A | G | C | A | G | A | G | I | T | Y | L | H      | .....G | .....  |        |        |        |        |
| UniRef100_A0A329TZB5 | .....KL..L | RALT  | LS | N | L | T | T | I | H | E | K      | .....T | .....P | I      | G      | .....R | L      | S | A | Y | C | G      | .....A | I      | S      | A | G | A | G | A | G | I | A | Y | L | C | .....G | .....  |        |        |        |        |        |
| UniRef100_A0A329U9Y1 | .....KM..L | RAVT  | LS | N | L | I | A | I | R | I | K      | .....S | .....K | F      | G      | .....R | L      | S | N | L | C | G      | .....A | T      | V      | A | G | T | G | A | A | C | I | T | Y | L | L      | G      | .....G | .....G |        |        |        |
| UniRef100_A0A344MMA6 | .....QL..I | RALT  | MS | H | M | T | A | I | Y | I | H      | .....S | .....F | L      | P      | .....K | L      | S | A | L | C | A      | .....C | G      | T      | A | A | M | G | A | A | T | G | M | V | W | L      | L      | G      | .....G | .....K |        |        |
| UniRef100_A0A346AZS6 | .....DR..L | RAMV  | LS | H | M | M | A | I | Y | T | H      | .....S | .....F | L      | P      | .....K | L      | S | A | L | C | A      | .....T | I      | T      | A | S | M | G | S | A | S | G | M | A | W | L      | L      | D      | .....R | .....E |        |        |
| UniRef100_A0A346B2K8 | .....RL..L | RATA  | LS | Y | L | I | T | M | Y | I | K      | .....E | .....Y | S      | G      | .....R | L      | S | A | F | C | G      | .....C | A      | I      | A | A | G | T | G | M | A | C | A | L | A | W      | L      | K      | G      | .....D | .....L |        |
| UniRef100_A0A347AH72 | .....KE..I | RAVT  | LS | N | L | I | T | I | F | I | K      | .....S | .....N | I      | G      | .....R | L      | S | A | V | C | G      | .....A | S      | I      | S | A | M | G | A | C | C | G | I | T | F | L      | L      | G      | .....G | .....E |        |        |
| UniRef100_A0A347AJ71 | .....ML..I | KAVT  | LS | N | L | I | T | I | Y | I | K      | .....S | .....H | F      | G      | .....L | L      | S | P | M | C | G      | .....A | I      | I      | S | A | T | G | A | S | C | G | I | T | Y | L      | L      | G      | .....G | .....K |        |        |
| UniRef100_A0A348N1I3 | .....RL..Y | RAVY  | LS | N | L | L | T | I | H | Q | K      | .....H | .....A | I      | G      | .....R | L      | S | A | F | C | G      | .....G | V      | S      | A | A | A | S | S | A | A | A | L | T | Y | L      | S      | .....G | .....  |        |        |        |
| UniRef100_A0A349G9B8 | .....RL..A | RAAA  | IS | H | L | V | N | S | V | I | K      | .....Y | .....N | I      | G      | .....R | L      | S | A | L | C | G      | .....C | G      | V      | A | A | G | T | G | A | S | V | A | I | T | W      | L      | M      | G      | .....G | .....S |        |
| UniRef100_A0A349N0S4 | .....NL..V | RSLV  | F  | A | N | L | I | G | L | Y | L      | K      | .....S | .....G | I      | G      | .....K | L | S | A | Y | C      | G      | .....A | M      | S | A | A | S | A | G | A | A | G | I | A | F      | L      | H      | .....G | .....  |        |        |
| UniRef100_A0A349P8R7 | .....RI..L | RSIA  | L  | S | H | L | V | N | S | Y | I      | K      | .....V | .....F | T      | G      | .....E | L | S | P | I | C      | G      | .....C | A      | V | A | G | V | G | A | S | V | A | I | V | Q      | R      | S      | .....G | .....A |        |        |
| UniRef100_A0A349ZSM2 | .....RL..Y | RALL  | IS | N | L | I | T | L | H | A | K      | .....S | .....G | I      | G      | .....R | L      | S | A | Y | C | G      | .....A | V      | S      | A | G | A | G | A | G | A | G | I | A | F | L      | H      | .....G | .....  |        |        |        |
| UniRef100_A0A350BGQ8 | .....VI..A | ARSLA | Y  | S | L | A | V | T | I | Y | V      | K      | .....E | .....Y | F      | G      | .....L | L | S | P | V | C      | G      | .....C | A      | V | A | A | G | A | G | S | A | A | G | L | T      | I      | R      | E      | .....G | .....D |        |
| UniRef100_A0A350IFD9 | .....KL..A | RALI  | LS | N | L | V | A | I | H | I | K      | .....G | .....Y | L      | G      | .....R | L      | S | A | L | C | G      | .....C | V      | V      | A | S | T | G | S | S | C | G | L | V | W | L      | R      | G      | .....G | .....  |        |        |
| UniRef100_A0A350W0I4 | .....KL..Y | RALV  | F  | S | S | L | L | T | F | Q | K      | .....E | .....F | I      | G      | .....K | L      | S | A | F | C | G      | .....A | V      | S      | A | S | C | A | S | A | A | A | I | T | Y | L      | A      | .....G | .....  |        |        |        |
| UniRef100_A0A350X275 | .....MM..Y | RAVY  | L  | A | N | L | I | T | I | H | Q      | K      | .....T | .....G | I      | G      | .....R | L | S | A | Y | C      | G      | .....A | V      | S | A | A | C | G | S | G | A | A | A | I | T      | Y      | L      | E      | .....G | .....  |        |
| UniRef100_A0A351AS26 | .....RL..A | RALI  | LS | N | L | V | A | I | H | I | K      | .....G | .....Y | L      | G      | .....K | L      | S | A | L | C | G      | .....C | V      | T      | A | S | T | G | S | A | C | G | I | V | F | L      | R      | G      | .....N | .....  |        |        |
| UniRef100_A0A351EDR8 | .....KM..I | RAVA  | L  | S | D | L | V | T | I | H | L      | K      | .....S | .....G | I      | G      | .....R | L | S | A | Y | C      | G      | .....A | V      | S | A | G | C | G | A | G | I | A | Y | L | Y      | .....G | .....  |        |        |        |        |
| UniRef100_A0A351TJ11 | .....KL..Y | RALV  | F  | S | S | L | L | T | I | Y | Q      | K      | .....E | .....F | I      | G      | .....K | L | S | A | F | C      | G      | .....A | V      | S | A | S | C | A | S | A | A | A | I | T | Y      | M      | V      | .....G | .....  |        |        |
| UniRef100_A0A351UIB2 | .....RI..L | KSIA  | L  | S | H | L | V | N | S | Y | I      | K      | .....V | .....F | T      | G      | .....E | L | A | P | I | C      | G      | .....C | A      | V | A | G | V | G | A | S | V | A | V | W | Q      | R      | S      | .....G | .....P |        |        |
| UniRef100_A0A351UVB6 | .....QT..I | RALV  | L  | S | H | L | T | S | I | Y | I      | K      | .....Q | .....S | L      | G      | .....R | L | S | A | L | C      | G      | .....C | V      | V | A | S | T | G | A | S | A | A | I | V | Y      | L      | M      | .....G | .....  |        |        |
| UniRef100_A0A351UVG4 | .....QL..Y | RALT  | LS | N | L | V | A | I | H | Q | K      | .....T | .....G | I      | G      | .....R | L      | S | A | Y | C | G      | .....A | V      | C      | A | G | A | A | A | G | A | G | I | A | Y | L      | C      | .....G | .....  |        |        |        |
| UniRef100_A0A351XYN7 | .....QL..I | RALI  | LS | N | L | T | M | Y | I | Y | K      | .....Q | .....H | I      | G      | .....R | L      | S | A | L | C | G      | .....C | V      | V      | A | S | T | G | A | S | C | G | I | T | W | L      | M      | G      | .....N | .....  |        |        |
| UniRef100_A0A352A5R7 | .....DL..S | KALA  | I  | S | H | V | T | A | Y | V | K      | .....H | .....Y | I      | G      | .....R | L      | S | P | L | C | G      | .....C | S      | T      | A | A | S | T | G | S | A | C | A | I | T | W      | L      | M      | G      | .....G | .....S |        |
| UniRef100_A0A352HTF0 | .....QT..I | RALT  | L  | S | H | L | T | S | I | Y | I      | K      | .....Q | .....S | L      | G      | .....C | L | S | A | L | C      | G      | .....C | V      | V | A | S | T | G | A | S | C | G | I | V | Y      | L      | M      | G      | .....G | .....  |        |
| UniRef100_A0A352NCV1 | .....KL..I | RALT  | L  | S | H | L | T | A | L | Y | I      | H      | .....A | .....F | L      | P      | .....L | L | S | A | Y | C      | A      | .....T | D      | S | A | A | M | G | A | A | A | L | I | Y | L      | E      | S      | .....E | .....D |        |        |
| UniRef100_A0A352P5R0 | .....KL..Y | RALA  | L  | S | N | L | S | A | I | H | Q      | K      | .....T | .....P | I      | G      | .....R | L | S | A | Y | C      | G      | .....A | V      | N | A | G | A | G | A | G | A | G | I | A | Y      | L      | C      | .....G | .....  |        |        |
| UniRef100_A0A352ZB45 | .....KL..L | RALA  | V  | S | N | L | V | A | I | H | Q      | K      | .....E | .....Y | V      | G      | .....K | L | S | A | Y | C      | G      | .....A | V      | S | A | A | V | G | A | A | A | G | I | A | Y      | L      | Q      | .....G | .....  |        |        |
| UniRef100_A0A353BWM0 | .....KK..I | RAVT  | L  | S | H | L | I | T | I | Y | I      | K      | .....L | .....K | F      | G      | .....R | L | S | A | L | C      | G      | .....A | T      | T | S | A | I | G | A | S | C | G | I | T | Y      | L      | L      | G      | .....G | .....D |        |
| UniRef100_A0A353E5G4 | .....EL..I | RALM  | L  | S | H | L | T | A | I | Y | I      | K      | .....Q | .....S | L      | G      | .....K | L | S | A | L | C      | G      | .....C | V      | T | A | S | T | G | S | S | C | G | I | T | Y      | L      | M      | G      | .....G | .....D |        |
| UniRef100_A0A353JZW6 | .....KL..A | ARALA | F  | S | H | L | V | T | I | Y | I      | K      | .....E | .....Y | T      | G      | .....K | L | S | P | I | C      | G      | .....C | S      | T | A | A | G | I | A | S | V | S | V | A | W      | L      | I      | G      | .....C | .....N |        |
| UniRef100_A0A353Q9I3 | .....AL..V | RALI  | L  | S | H | L | T | V | I | Y | V      | K      | .....Q | .....Y | L      | G      | .....R | L | S | A | L | C      | G      | .....C | V      | V | A | T | T | G | A | S | C | G | L | V | H      | L      | M      | G      | .....N | .....  |        |
| UniRef100_A0A353RNY3 | .....EL..I | RALI  | LS | N | L | M | M | I | Y | I | K      | .....Q | .....H | I      | G      | .....R | L      | S | A | L | C | G      | .....C | V      | V      | A | S | T | G | A | S | C | G | I | T | Y | L      | M      | G      | .....G | .....S |        |        |
| UniRef100_A0A353WQJ7 | .....QL..T | RALT  | L  | S | H | L | T | A | I | Y | I      | K      | .....Q | .....S | L      | G      | .....R | L | S | A | L | C      | G      | .....C | V      | V | A | A | T | G | S | S | C | G | I | T | Y      | L      | M      | G      | .....G | .....  |        |
| UniRef100_A0A354CVH6 | .....QL..Y | RALL  | I  | S | N | L | V | T | I | H | L      | K      | .....T | .....G | I      | G      | .....C | L | S | A | Y | C      | G      | .....A | I      | S | A | G | C | A | G | A | G | I | T | Y | L      | Y      | .....G | .....  |        |        |        |
| UniRef100_A0A354KVM3 | .....KL..A | AKALA | I  | S | H | L | V | T | A | Y | V      | K      | .....N | .....F | T      | G      | .....R | L | S | A | V | C      | G      | .....C | G      | V | A | A | S | T | G | A | S | A | G | I | A      | W      | L      | M      | D      | .....G | .....K |
| UniRef100_A0A354WYR3 | .....QL..I | RALM  | L  | S | H | L | M | V | I | Y | I      | K      | .....Q | .....S | L      | G      | .....R | L | S | A | L | C      | G      | .....C | V      | V | A | A | T | G | A | S | C | G | I | T | W      | L      | M      | G      | .....G | .....T |        |
| UniRef100_A0A354ZC21 | .....DI..A | RAIA  | V  | S | H | L | S | T | S | L | V      | K      | .....S | .....R | V      | G      | .....R | L | S | S | V | C      | G      | .....C | V      | V | A | A | G | A | G | A | A | G | A | W | L      | M      | G      | .....G | .....  |        |        |
| UniRef100_A0A354ZK32 | .....EI..A | AYALA | V  | S | H | L | S | T | S | Y | V      | K      | .....S | .....R | L      | G      | .....R | L | T | S | I | C      | G      | .....C | A      | V | A | A | G | A | S | G | A | A | G | M | V      | T      | L      | L      | G      | .....G | .....S |
| UniRef100_A0A355C672 | .....SL..I | RALI  | L  | S | N | L | S | T | I | Y | I      | K      | .....Q | .....Y | L      | G      | .....R | L | S | A | L | C      | G      | .....C | V      | V | A | S | A | G | S | S | C | G | I | T | Y      | L      | M      | G      | .....N | .....  |        |
| UniRef100_A0A355MAF9 | .....KL..L | RALF  | F  | S | H | L | T | V | H | I | K      | .....T | .....K | V      | G      | .....E | L      | S | A | Y | C | G      | .....A | V      | C      | A | A | A | A | V | S | G | A | I | A | F | L      | D      | .....D | .....  |        |        |        |
| UniRef100_A0A355PSM2 | .....TL..L | RATA  | L  | S | Y | L | T | V | M | Y | I      | K      | .....E | .....Y | S      | G      | .....K | L | S | A | F | C      | G      | .....C | A      | I | A | A | G | T | G | M | A | C | G | L | V      | M      | R      | G      | .....D | .....T |        |
| UniRef100_A0A355TT25 | .....KL..Y | RALV  | F  | S | N | L | M | T | I | Y | Q      | K      | .....K | .....F | I      | G      | .....C | L | S | A | F | C      | G      | .....A | V      | S | A | S | C | A | S | A | G | V | A | L | T      | Y      | I      | N      | .....G | .....  |        |
| UniRef100_A0A355UQR3 | .....TI..Y | KSIA  | L  | S | H | L | L | N | A | Y | V      | K      | .....V | .....F | T      | G      | .....E | L | A | C | T | I      | C      | G      | .....C | A | I | A | A | G | V | G | A | T | A | I | V      | Y      | Q      | Q      | K      | .....G | .....K |
| UniRef100_A0A355YLJ0 | .....KL..Y | RALV  | IS | N | L | T | A | I | H | L | K      | .....T | .....G | I      | G      | .....R | L      | S | A | Y | C | G      | .....A | V      | S      | A | G | A | G |   |   |   |   |   |   |   |        |        |        |        |        |        |        |

UniRef100\_A0A3A5R7E4 . . . . . ET . . . L RALI . VSNLVSIIYIK . . . . . H . . . . . YI G . . . . . PLSAFCG . . . A . VS . ASTGA . GAAITFMA . T . . .  
UniRef100\_A0A3A6NWZ1 . . . . . DI . . . L RAIG . LSHIITAYVK . . . . . T . . . . . HT G . . . . . RLSAVCG . . . CSVA . AGAGA . ASGVTYLLG . GD . .  
UniRef100\_A0A3A6QCR2 . . . . . QT . . . I RALM . LSHLMNAVYIK . . . . . S . . . . . YQN . . . . . KLSALCG . . . A . TT . ASMGS . AAGITYLLG . GN . .  
UniRef100\_A0A3A8U1P1 . . . . . QL . . . V KALA . FSHALNVYIK . . . . . M . . . . . YT G . . . . . KLSATCG . . . CGVS . AATAA . AASMVWLMG . GS . .  
UniRef100\_A0A3A8UIV9 . . . . . EL . . . Y RALV . LSNLVTIHKQ . . . . . T . . . . . GI G . . . . . RLSAYCG . . . A . VS . AGCGA . GCGIAYLL . G . .  
UniRef100\_A0A3A8UPF0 . . . . . KL . . . L RALA . LANLTAIHEK . . . . . T . . . . . PI G . . . . . RLSAYCG . . . A . VS . AGAGA . GAGIAYLS . G . .  
UniRef100\_A0A3A8Z6E7 . . . . . KI . . . F RALV . LSNLITIHKQ . . . . . T . . . . . RI G . . . . . RLSAYCG . . . A . VS . AGAAA . GAGIAYLD . G . .  
UniRef100\_A0A3A9AN50 . . . . . KM . . . Y RALA . VSNLVAIHKQ . . . . . K . . . . . YI G . . . . . SLSAYCG . . . A . VS . AACGA . GAAITWLY . G . .  
UniRef100\_A0A3A9BHR1 . . . . . KT . . . L RALA . LSNLCAIHKQ . . . . . T . . . . . RI G . . . . . RLSAYCG . . . A . VN . AGSGA . GAGIAYLC . G . .  
UniRef100\_A0A3A9BSG2 . . . . . QL . . . V KALA . FSHALNVYIK . . . . . S . . . . . YT G . . . . . KLSATCG . . . CGVS . AATAA . SAAMVWLMG . GN . .  
UniRef100\_A0A3A9CYB0 . . . . . EL . . . Y RALL . VSNLVTIHLK . . . . . S . . . . . GI G . . . . . RLSAYCG . . . A . VS . AGAGA . GAGIAYLL . T . .  
UniRef100\_A0A3A9EDE3 . . . . . EM . . . Y RALV . LSNLVTIHKQ . . . . . T . . . . . GI G . . . . . RLSAYCG . . . A . VS . AGCGA . GCGIAYLL . G . .  
UniRef100\_A0A3A9EDL9 . . . . . KT . . . L RALA . LSNLCSIHKQ . . . . . T . . . . . KI G . . . . . RLSAYCG . . . A . VN . AGSGA . GAGIAYLC . G . .  
UniRef100\_A0A3A9ELN6 . . . . . KL . . . H RALL . VSDLVTIQQK . . . . . S . . . . . GI G . . . . . RLSAYCG . . . A . . . . . G IAYLL . D . .  
UniRef100\_A0A3A9FPZ7 . . . . . KL . . . Y RALL . VSDLVTIHKQ . . . . . S . . . . . GI G . . . . . RLSAYCG . . . A . VS . AGSGA . GAGIAYLL . D . .  
UniRef100\_A0A3A9FW91 . . . . . KL . . . Y RALV . VSNLISIHKQ . . . . . K . . . . . YI G . . . . . SLSAYCG . . . A . VS . AACGS . GAAITYLY . G . .  
UniRef100\_A0A3A9HQJ2 . . . . . EI . . . M RALA . ASFLLCVMYK . . . . . S . . . . . LI G . . . . . RLSMPCA . CAIA . SSVGI . AGGMVMLLG . GGT . .  
UniRef100\_A0A3B8RB37 . . . . . QT . . . V RALI . LSHLTSIYIK . . . . . Q . . . . . SLG . . . . . RLSALCG . . . C . VV . ASTGA . SGALVYLMG . G . .  
UniRef100\_A0A3B8XA78 . . . . . PL . . . A RALI . LSNLVAIHIK . . . . . H . . . . . YL G . . . . . KLSALCG . . . C . VV . ASTGS . ACGIVYLLQ . G . .  
UniRef100\_A0A3B9ECG9 . . . . . RL . . . L RALV . LSYLTTIYIK . . . . . T . . . . . FTG . . . . . VLSPICG . . . CGVA . AAVGA . GCGIVFLLG . GS . .  
UniRef100\_A0A3B9FAN4 . . . . . EL . . . V RALA . LSHLTVIYIK . . . . . Q . . . . . SLG . . . . . PLSALCG . . . C . VV . ASIGA . SSGIVYLMG . GS . .  
UniRef100\_A0A3B9IBT1 . . . . . KM . . . Y RCLL . VSNLVSIIYIK . . . . . H . . . . . YI G . . . . . SLSAFCG . . . A . VS . AACGA . GAGITYMS . G . .  
UniRef100\_A0A3B9Q7L5 . . . . . TT . . . L RAVL . LSDLVTIALK . . . . . Q . . . . . GI G . . . . . KLSAYCG . . . A . VS . AGCGS . GAGIGFLE . G . .  
UniRef100\_A0A3B9RT85 . . . . . AL . . . G KALV . LSELVLGSLT . . . . . A . . . . . RKN . . . . . RLSALCG . . . A . FT . AAI GT . ACGLVYLLD . GD . .  
UniRef100\_A0A3B9TS24 . . . . . DT . . . A KAIA . LSHLTTSPFIK . . . . . S . . . . . RMG . . . . . RLSPVCG . . . CSVA . AGAGA . AAGIAYLRS . KS . .  
UniRef100\_A0A3B9YD34 . . . . . TI . . . L RSIA . LSHLLNAFVK . . . . . V . . . . . HTG . . . . . ALAPICG . . . CAIA . AGVGA . AAAIVYQK . GA . .  
UniRef100\_A0A3C0D3C1 . . . . . KM . . . L RAVT . LSNLIAIRIK . . . . . A . . . . . KFG . . . . . RLSNLCG . . . A . TV . AATGA . ACGIAYLLG . GGY . .  
UniRef100\_A0A3C0KX94 . . . . . RI . . . QESIA . VSHAVNSYIK . . . . . S . . . . . YT G . . . . . ELSVTCG . . . CAIA . ASISA . AIAIVYQQA . GI . .  
UniRef100\_A0A3C0NP20 . . . . . EL . . . L RALT . VSNLVTIHLK . . . . . T . . . . . GI G . . . . . RLSAYCG . . . A . VS . AGAGA . ACGIAYLO . G . .  
UniRef100\_A0A3C0SSE4 . . . . . QL . . . L RATA . LSYLITMYIK . . . . . E . . . . . YS G . . . . . RLSAFCG . . . CAIA . AGTGM . ACALVFMKN . GTL . .  
UniRef100\_A0A3C1ELK2 . . . . . AI . . . CRSIA . FSHLLNAVYVK . . . . . I . . . . . FTG . . . . . GLAPVCG . . . CAIA . AGVGA . AAAIVYQRN . GR . .  
UniRef100\_A0A3C1F9S1 . . . . . TI . . . L KSIA . LSHLLNGYVK . . . . . V . . . . . FTG . . . . . ELAPICG . . . CAIA . AGVGA . TAAITYQK . GN . .  
UniRef100\_A0A3C1Q9K3 . . . . . EI . . . A RAVA . VSLSTSIFVR . . . . . S . . . . . KTG . . . . . RLTPICG . . . CSVA . AGAGA . AAGMACLLG . GD . .  
UniRef100\_A0A3D0MPX6 . . . . . AL . . . L RSLA . LSLFLVTIYK . . . . . S . . . . . HIG . . . . . RLSPMCA . CAIA . AGLGV . TSGMVLMLD . GSF . .  
UniRef100\_A0A3D1D0D1 . . . . . EL . . . I RALT . LSHLTAIYIK . . . . . Q . . . . . SLG . . . . . ALSALCG . . . C . VV . ASTGA . SCGIVYLMG . GD . .  
UniRef100\_A0A3D1HK1K . . . . . EL . . . I RALV . MSNLTAIYIK . . . . . Q . . . . . NLG . . . . . TLSALCG . . . C . VV . ASTGS . SCGITLYLMG . GT . .  
UniRef100\_A0A3D1M5K9 . . . . . KL . . . Y RALV . LGNLVSIIHEK . . . . . A . . . . . PI G . . . . . VLSAYCG . . . A . VS . AGAGA . AAGIAYLY . D . .  
UniRef100\_A0A3D1N2N5 . . . . . RI . . . L KSIA . LSHLVNAYIK . . . . . V . . . . . YT G . . . . . ELAPICG . . . CAVA . AGVGA . AVAIVWQK . GA . .  
UniRef100\_A0A3D1NE50 . . . . . AL . . . L RALV . VSNLVTIHKQ . . . . . T . . . . . GI G . . . . . RLSAYCG . . . A . VS . AGCGA . GAGIAYLH . G . .  
UniRef100\_A0A3D1T396 . . . . . AM . . . AVALA . TSHVVTGFVK . . . . . S . . . . . KLG . . . . . RLSPVCG . . . CTVA . AGSGA . AAGLVRFLG . GT . .  
UniRef100\_A0A3D1V9H2 . . . . . ML . . . Y RALV . VSNLVTIHLK . . . . . T . . . . . GI G . . . . . SLSAYCG . . . A . TA . AGCGA . AAGVYLY . G . .  
UniRef100\_A0A3D1WY02 . . . . . HL . . . V RALC . TSHLVALVLT . . . . . A . . . . . KKD . . . . . RLSALCG . . . A . FT . AAI GT . ACGLVYLLQ . GS . .  
UniRef100\_A0A3D1X7S0 . . . . . QL . . . Y RALV . VSNLVTIHLK . . . . . T . . . . . GI G . . . . . SLSAYCG . . . A . TS . AGCGA . GAGVCYLY . G . .  
UniRef100\_A0A3D2BIJ5 . . . . . KT . . . A RALI . LSHLLAIYIH . . . . . H . . . . . KFP . . . . . ALSALCA . A . TT . ASMGA . AGAIAWLME . ER . .  
UniRef100\_A0A3D2GB33 . . . . . KV . . . V KAVL . LSVLVTIYVK . . . . . A . . . . . YT G . . . . . KLTPICG . . . AGSI . ASSGT . AAGFTYLHT . DD . .  
UniRef100\_A0A3D2GZC8 . . . . . KE . . . LRAIA . LAALANVYIK . . . . . S . . . . . FIG . . . . . PLSVCA . CGVA . SGLSA . SLGVYLLG . GG . .  
UniRef100\_A0A3D2I8K7 . . . . . TI . . . L RAVC . LSDLITIHKQ . . . . . T . . . . . GI G . . . . . RLSAYCG . . . A . VS . AGVGA . GAGIAYLR . G . .  
UniRef100\_A0A3D2KM10 . . . . . AL . . . A RALV . LAHAVNLVFK . . . . . A . . . . . FTG . . . . . GVSALCG . . . S . VT . GAAV . AAACHLAG . GSP . .  
UniRef100\_A0A3D2ND9A . . . . . EL . . . I RALT . LSHLTAIYIK . . . . . Q . . . . . SLG . . . . . KLSALCG . . . C . VV . ASIGS . SCGIVYLMG . GD . .  
UniRef100\_A0A3D2P0A7 . . . . . KL . . . A RALA . LSHLVTAYIK . . . . . E . . . . . YT G . . . . . KLSPVCG . . . CSVA . AGICA . SASIAWLLG . GGY . .  
UniRef100\_A0A3D2SHK3 . . . . . EL . . . I RALM . MSHLTVIYIK . . . . . Q . . . . . SLG . . . . . RLSALCG . . . C . VV . AATGS . SCGITWLMG . GG . .  
UniRef100\_A0A3D2W3X1 . . . . . KL . . . Y RALL . ISCLLTLMHK . . . . . A . . . . . GI G . . . . . RLSAYCG . . . A . VS . AGAGA . GAGIAYLH . G . .  
UniRef100\_A0A3D3CDZ3 . . . . . KI . . . AHGLL . VSHLATAYVK . . . . . S . . . . . RTG . . . . . RLSTTCG . . . CAF . AAGS . AAGMTWLMT . ED . .  
UniRef100\_A0A3D3FT93 . . . . . RM . . . H RALV . LSNLVAIHKQ . . . . . T . . . . . RI G . . . . . SLSAYCG . . . A . VC . AACGS . GAAIAWMD . G . .  
UniRef100\_A0A3D3MPV7 . . . . . EL . . . V RALT . LSHLTAIYIK . . . . . Q . . . . . SLG . . . . . KLSALCG . . . C . VV . ASIGS . SCGITLYLMG . GD . .  
UniRef100\_A0A3D3QSD6 . . . . . LI . . . IRSVA . LSHLVTIYVK . . . . . V . . . . . HLG . . . . . VLTPIVCG . . . CGVA . AGVGC . AAGIAYLKS . GT . .  
UniRef100\_A0A3D3RH36 . . . . . KM . . . Y RALA . VSNLISIHKQ . . . . . K . . . . . YI G . . . . . SLSAYCG . . . A . VS . AACGS . GAGITYLY . G . .  
UniRef100\_A0A3D3TCL4 . . . . . EL . . . I RALT . LSNLVTIYIK . . . . . Q . . . . . SLG . . . . . RLSALCG . . . C . VV . AATGS . SCGITLYLMG . GC . .  
UniRef100\_A0A3D3UQ13 . . . . . DV . . . LRAIA . LSHIITGVYK . . . . . S . . . . . HTG . . . . . RLSAVCG . . . CSVA . AGAGA . AAGTAYLMG . GD . .  
UniRef100\_A0A3D3W8G7 . . . . . KL . . . Y RALV . LSNLNSMHQK . . . . . R . . . . . YI G . . . . . NLSAYCG . . . A . VS . AGASA . ACGIAYLH . G . .  
UniRef100\_A0A3D4E8U0 . . . . . QL . . . S RALI . LSNLVAIHIK . . . . . G . . . . . YL G . . . . . KLSALCG . . . C . VI . ASTGS . ACGIVYLRG . GS . .  
UniRef100\_A0A3D4G5E1 . . . . . TI . . . L RAVC . LSDLITIHKQ . . . . . T . . . . . GI G . . . . . RLSAYCG . . . A . VS . AGVGA . GCGIAYLR . G . .  
UniRef100\_A0A3D4LM30 . . . . . KI . . . LRSVT . LSHLITIHKQ . . . . . V . . . . . YL G . . . . . ALSPVCG . . . CGVA . AGVGC . AAGLTYMLS . GN . .  
UniRef100\_A0A3D4MUG6 . . . . . QL . . . Y RALA . VSDLVTIHKQ . . . . . T . . . . . GI G . . . . . RLSAYCG . . . A . VS . AGVGA . GAGIAYLL . G . .  
UniRef100\_A0A3D4QA04 . . . . . KM . . . E RALL . VSNLVSIIYIK . . . . . H . . . . . YI G . . . . . ALSAFCG . . . A . VS . ASCGA . GAGITYLS . G . .  
UniRef100\_A0A3D4XHK1 . . . . . EL . . . A RALV . LAHLVAIHIK . . . . . G . . . . . YL G . . . . . KLSALCG . . . C . VI . ASTGA . SCGIVYLLG . GN . .  
UniRef100\_A0A3D4ZGW0 . . . . . KL . . . A RALL . LSQLVGLALT . . . . . A . . . . . RKN . . . . . RLSALCG . . . A . FT . AAI GT . ACGLVYLLD . GT . .  
UniRef100\_A0A3D5MNT0 . . . . . SL . . . A RALV . LAHAVNLVFK . . . . . A . . . . . FTG . . . . . EVSALCG . . . S . VT . GAAV . AAACHLAG . GSL . .  
UniRef100\_A0A3D5NPE1 . . . . . DL . . . L RATA . LSHLVTIYIK . . . . . T . . . . . KFG . . . . . RLSALCG . . . A . TI . AATGA . SCGITYLLQ . GKK . .  
UniRef100\_A0A3D5PD50 . . . . . RI . . . L RALI . VADLTTIHKQ . . . . . T . . . . . GI G . . . . . RLSAYCG . . . A . VS . AGCGA . ACGIAYLN . G . .  
UniRef100\_A0A3D5TFZ3 . . . . . NI . . . L RAVA . LSDLITIHKQ . . . . . T . . . . . GI G . . . . . RLSAYCG . . . A . VS . AGVGA . GAGIAYLR . G . .  
UniRef100\_A0A3D5U8T4 . . . . . QL . . . V RALA . MGHLSVVMK . . . . . N . . . . . KI G . . . . . LLSCTICG . . . C . LS . AAAA . ASGIVLLLG . GD . .  
UniRef100\_A0A3D5UCW1 . . . . . RI . . . I RAVT . LSHLVTIEVK . . . . . V . . . . . HLG . . . . . RLSPVCG . . . CGVA . AGVGC . AAGLTYLLD . GN . .  
UniRef100\_A0A3D5YS30 . . . . . QL . . . Y RALF . FSHLTTVHIK . . . . . S . . . . . KI G . . . . . RLSAYCG . . . P . MC . AAAGV . AGAIGLLN . D . .  
UniRef100\_A0A3D6BI84 . . . . . QL . . . L RALC . VSNLITIHKQ . . . . . T . . . . . PI G . . . . . RLSAFCG . . . A . VS . AGCGA . AAGVAYLL . E . .  
UniRef100\_A0A3D8J5V0 . . . . . LI . . . L RALF . LSHLVAIYIH . . . . . S . . . . . KLP . . . . . KLSALCA . V . TT . AGIGS . YAGIAWFLS . KD . .  
UniRef100\_A0A3D9A0A1 . . . . . ER . . . I RALT . LSHLTAIYIH . . . . . A . . . . . FL P . . . . . VLSAFCA . A . DS . AAMGS . AAGIAYLLT . KD . .  
UniRef100\_A0A3E2NDI2 . . . . . TM . . . Y RALA . LSNLTSIHKQ . . . . . T . . . . . PI G . . . . . RLSAYCG . . . A . VN . AGAGA . GAGIAYLC . G . .  
UniRef100\_A0A3E2TTU9 . . . . . QL . . . Y RALV . VSNLVAIHKQ . . . . . K . . . . . YI G . . . . . SLSAYCG . . . A . VS . AACGS . GAAITYLY . G . .  
UniRef100\_A0A3E2UCE9 . . . . . TM . . . L RAVT . LSNLIAIRIK . . . . . S . . . . . KFG . . . . . RLSNLCG . . . A . TV . AGTGA . ACGITYLLG . GGY . .  
UniRef100\_A0A3E2VXF0 . . . . . QL . . . Y RALL . ISNLSTLYQK . . . . . K . . . . . YI G . . . . . RLSAYCG . . . A . VS . AGAGA . GAGIAYLL . G . .  
UniRef100\_A0A3E3DCN8 . . . . . RL . . . Y RALV . LSNLIIAHLK . . . . . T . . . . . GLG . . . . . RLSAYCG . . . A . VS . AGSGA . GCGIAWLK . G . .  
UniRef100\_A0A3E3DHD3 . . . . . KL . . . L RALA . LSCLTTHVK . . . . . Q . . . . . YI G . . . . . KLSPLCG . . . CGMG . SSGIV . CCALVYMQG . GG . .  
UniRef100\_A0A3E3E7L6 . . . . . KL . . . Y RALL . ISNLITMHLK . . . . . Y . . . . . GI G . . . . . KLSAYCG . . . V . VS . AGVGA . ACGICYLE . G . .  
UniRef100\_A0A3E3E836 . . . . . QL . . . Y QATA . LSYLICMYIK . . . . . E . . . . . YS G . . . . . KLSAFCG . . . CGIA . AGTGM . ACGLVYLLQ . GNK . .  
UniRef100\_A0A3E4F607 . . . . . KT . . . Y RALA . LSNLIIAHIKQ . . . . . T . . . . . GI G . . . . . RLSAYCG . . . A . VS . AGAAA . GAGIAYLC . G . .  
UniRef100\_A0A3E4GUD7 . . . . . MM . . . L RALV . VSNLITIHKQ . . . . . T . . . . . GI G . . . . . RLSAYCG . . . A . VS . AGCGA . GAGICYLY . G . .  
UniRef100\_A0A3E5BSB1 . . . . . EL . . . I RALM . LSHLTVIYIK . . . . . Q . . . . . SLG . . . . . RLSALCG . . . C . VV . AATGS . SCGITWLMG . GS . .  
UniRef100\_A0A3G9GUB8 . . . . . KR . . . Y RALL . VSNLITIHLK . . . . . S . . . . . GI G . . . . . RLSAYCG . . . A . VS . AGCAS . GAGIAYLY . G . .  
UniRef100\_A0A3G9JP81 . . . . . RL . . . L RALA . LSNLVAIHEK . . . . . T . . . . . GI G . . . . . TLSAYCG . . . A . VT . AGAGA . GAGIAYLL . E . .  
UniRef100\_A0A3N0IVB1 . . . . . RL . . . Y RALV . LSNLVAIHKQ . . . . . T . . . . . GI G . . . . . RLSAFCG . . . A . VS . AGAAA . GAGIAYLD . G . .  
UniRef100\_A0A3N1WCR8 . . . . . KL . . . ARSLI . LSHLVAIYIH . . . . . S . . . . . KLP . . . . . TLSALCA . V . ST . ASMG . AAGIAWLLG . GD . .  
UniRef100\_A0A3N1YL98 . . . . . EA . . . L KAVA . LSMLITIYVK . . . . . L . . . . . FIG . . . . . RLSVICG . . . AA . VA . SGC . AGIAYLES . D . .  
UniRef100\_A0A3N2DXY3 . . . . . KL . . . ARSLI . MSHLGAIYIK . . . . . S . . . . . HYP . . . . . PLSPIVCG . . . N . TV . TSAA . SMGLVYLLG . GS . .  
UniRef100\_A0A3N2KSY6 . . . . . QT . . . I RALI . LSHLTSIYIK . . . . . Q . . . . . SLG . . . . . RLSALCG . . . C . VV . ASTGA . SAAIVYLMG . GG . .  
UniRef100\_A0A3N2MDS7 . . . . . KT . . . I RALM . MSNLTSIYIK . . . . . Q . . . . . SLG . . . . . RLSALCG . . . C . VV . ASTGA . SAGLTYLMG . GG . .  
UniRef100\_A0A3N2N806 . . . . . QT . . . I RALV . LSHLTSIYIK . . . . . Q . . . . . SLG . . . . . RLSALCG . . . C . VV . ASTGA . SSALVYLMG . GG . .  
UniRef100\_A0A3N5KH61 . . . . . TV . . . LTSIA . FSHLLNAYIK . . . . . C . . . . . FTG . . . . . DLAPICG . . . CAIA . AGVGA . AAAIVYQQA . GK . .  
UniRef100\_A0A3N5LTA0 . . . . . TI . . . LESIA . LSHIVTAYVK . . . . . A . . . . . HTG . . . . . RLSALCG . . . CSIA . AGAGA . AAGITHLMG . GT . .  
UniRef100\_A0A3N5Z0J3 . . . . . TI . . . FKSIA . LSHLVNGYIK . . . . . Y . . . . . YT G . . . . . DLSPICG . . . CAIA . AGVGA . AVAIVYQRS . GK . .  
UniRef100\_A0A3N6MSR7 . . . . . AL . . . ARSLA . LSHLVAISTH . . . . . A . . . . . RYT . . . . . RLSALCA . V . TT . AAMGA . AAGMSWFLA . RD . .  
UniRef100\_A0A3N9QPF7 . . . . . KL . . . A RALM . LSHLTAIYIH . . . . . S . . . . . KLP . . . . . ALSALCA . V . TT . ASMG . AAGMAWLLD . NK . .  
UniRef100\_A0A3P1Y7P1 . . . . . EI . . . ARAIA . YSHLATSIIK . . . . . S . . . . . RMG . . . . . RLSPVCG . . . CAVA . AGAGA . AAGIVKLLG . GD . .



UniRef100\_A0A3P1ZCK5 . . . . . E L . . T R A L M . . L S H L T A I Y I K . . . . . Q . . . . H L G . . . . T L S A L C G . . C . V V . A S T G S . A C G I T L L M G . G N . .  
UniRef100\_A0A3P1ZVF1 . . . . . K L . . I R A L A . . L S H L V T I A I K . . . . . E . . . . L S G . . . . P L S P V C G . . C A I A . A G V G A . A V A V A W L L G . C E D . .  
UniRef100\_A0A3P3R193 . . . . . K L . . Y R A L A . . L S N L T S I H Q K . . . . . H . . . . G I G . . . . T L S A Y C G . . A . V S . A G A G A . G A G I A Y L T . E . . .  
UniRef100\_A0A3Q9B6K4 . . . . . K L . . I R A T F . . F G H A I N N P I K . . . . . A . . . . Y T G . . . . K L S V I C G . . C A I G . A G I G A . S A G I T W L L G . G K E . .  
UniRef100\_A0A3R5WWV9 . . . . . Q L . . Y R A L V . . L S N L V A I H Q K . . . . . T . . . . G I G . . . . R L S A Y C G . . A . V C . A G A A . G T G I A Y L C . G . . .  
UniRef100\_A0A3R5Z781 . . . . . M L . . Y R A T A . . L S Y L V C M Y I K . . . . . E . . . . Y S G . . . . K L S A F C G . . C G I A . A G T M . A C A L V Y L N G . G D E . .  
UniRef100\_A0A3R5Z241 . . . . . Q E . . V R A L A . . L S H L V N R Y I N . . . . . A . . . . K I G . . . . K L S P M C T . . C V M A . A S T A A . A A G M A Y L F G . G T . .  
UniRef100\_A0A3R6AZQ5 . . . . . T L . . V K A L A . . V S N L M T I Y Q R . . . . . T . . . . R I G . . . . K L S A F C G . . A . V N . A G C A S . G T G I A Y L M . G . . .  
UniRef100\_A0A3R6J8M8 . . . . . T M . . Y R A M A . . L S D L T T I H Q K . . . . . S . . . . P I G . . . . R L S A Y C G . . A . V S . A G A G S . G A G I A Y L S . G . . .  
UniRef100\_A0A3R6NDL9 . . . . . Q L . . L R A L A . . M S F L M T I C V K . . . . . N . . . . R I G . . . . R V S S M C A . . C V T A . A S Q G V . A A G A S M L L G . G D L . .  
UniRef100\_A0A3R6NZK5 . . . . . A M . . Q R G I A . . L S Y C L A I A I I . . . . . H . . . . R I G . . . . K D P S M C S . . C E V A . A A I G V . A A G T V L L H G . G T Q . .  
UniRef100\_A0A3R6PRW7 . . . . . Q L . . Y R A L T . . L S N L T T I H E K . . . . . T . . . . P I G . . . . R L S A Y C G . . A . I S . A G A G A . G A G I A Y L C . G . . .  
UniRef100\_A0A3R6Q0J7 . . . . . M R . . Y R A L T . . L A N L T T I H V K . . . . . T . . . . P I G . . . . R L S A Y C G . . A . V S . A G A G A . G A G I A Y L C . G . . .  
UniRef100\_A0A3R6SQM7 . . . . . K M . . Y R A L A . . L S N L T A I H Q K . . . . . T . . . . P I G . . . . R L S A F C G . . A . I S . A G V G A . G A G I S Y L K . G . . .  
UniRef100\_A0A3R6VXH6 . . . . . K E . . Y R A L V . . L S N L V A I Y Q K . . . . . N . . . . E L G . . . . K L S A Y C G . . A . V S . A A T G A . G A G I A Y L H . G . . .  
UniRef100\_A0A3S0AVY6 . . . . . E L . . Y R G L F . . F S H L S S V H I K . . . . . A . . . . S I G . . . . R L S A Y C G . . P . M C . A A G A V . A G A I S V M S . G . . .  
UniRef100\_A0A3S0AXB5 . . . . . K E . . I R A L T . . L S H L T A L Y I H . . . . . A . . . . F L P . . . . V L S A F C A . . A . D S . A A M G A . A A G I V Y L L D . G E . .  
UniRef100\_A0A3S6GF254 . . . . . Q L . . A R A L M . . L S H L M A I Y I H . . . . . S . . . . Q L P . . . . S L S A L C A . . A . T T . A S M G A . A A G M A W L I E . P G . .  
UniRef100\_A0A3S9GWJ1 . . . . . E I . . A R A I A . . I S H L T T S V V K . . . . . S . . . . K I G . . . . R L S P V C G . . C A V A . A G S G A . A A G L T Y I L E . G N . .  
UniRef100\_A0A3S9PA89 . . . . . Q M . . Y R A L F . . M S H L T T V H V K . . . . . T . . . . N V G . . . . R L S A Y C G . . A . M T . A S A A V . S G T I V L F L E . G . . .  
UniRef100\_A0A3T0I0D0 . . . . . K M . . I R A V A . . L S H L I T I H I K . . . . . S . . . . K F G . . . . R L S A L C G . . V . T A . A G M G A . S G A I V Y L L G . G G L . .  
UniRef100\_A0A3T0L0Z0 . . . . . E T . . F R A L A . . L S M L T I V V V K . . . . . L . . . . F I G . . . . R L S A I C G . . A A F A . S G C G V . A G A I S Y L E S . K N . .  
UniRef100\_A0A401M0C1 . . . . . E L . . I R A L I . . L S H L T V I Y I K . . . . . Q . . . . S L G . . . . R L S A L C G . . C . V V . A A T G S . S C G I T R L M G . G N . .  
UniRef100\_A0A401UQW0 . . . . . K L . . A K A V A . . I S H I M N S Y I K . . . . . H . . . . Y I G . . . . R L S A L C A . . C G V A . A G T G S . G V A I A W L M G . A S E . .  
UniRef100\_A0A410DCK0 . . . . . K L . . Y R A L V . . L S N L T T I Y Q K . . . . . A . . . . G I G . . . . R L S A Y C G . . A . V S . A G C G A . G A G I A Y L H . G . . .  
UniRef100\_A0A410PIL5 . . . . . K L . . L R A L V . . V S N L V T I H Q K . . . . . T . . . . G I G . . . . R L S A F C G . . A . V C . A G C G S . G T G I A Y L H . G . . .  
UniRef100\_A0A410PZ62 . . . . . E T . . L R A L V . . V S N L I T I H Q K . . . . . S . . . . S I G . . . . R L S A F C G . . A . V S . A G C G A . G A A I A W L E . T . . .  
UniRef100\_A0A413CYD7 . . . . . K E . . L K A L A . . L G H L L N R Y I N . . . . . S . . . . Y I G . . . . K L S P M C T . . C V M A . S S T A C . S A A L V Y M F G . G N . .  
UniRef100\_A0A413G3M3 . . . . . K L . . L R A T A . . L S Y L V C M Y I K . . . . . E . . . . Y S G . . . . R L S A F C G . . C A T A . A G T M . A C A L V F L R D . G T V . .  
UniRef100\_A0A413G636 . . . . . K T . . I R A V T . . L S H M T A I Y I K . . . . . Q . . . . H L S . . . . S L S L C G . . A . I V . A A I G A . G C G I V Y L L G . G D . .  
UniRef100\_A0A413I6J2 . . . . . K L . . Y R A L A . . L S N L I A I H Q K . . . . . T . . . . G I G . . . . R L S A Y C G . . A . V C . A G A A . G T G I A Y L C . G . . .  
UniRef100\_A0A413JB40 . . . . . Q L . . L R A T A . . L S Y L I C M Y I K . . . . . E . . . . Y S G . . . . K L S A F C G . . C A I A . A G T M . A C A L V Y L R G . G T V . .  
UniRef100\_A0A413VL79 . . . . . V L . . L R A V A . . L S C L V S I M T I . . . . . S . . . . N I G . . . . K S P A M C S . . C M V S . A A L G V . A C G L V L M M D . G S Y . .  
UniRef100\_A0A413WGH3 . . . . . K L . . Y R A L V . . L S N L L T I H Q K . . . . . T . . . . P I G . . . . R L S A Y C G . . A . V N . A G A A . G C G I A Y L K . G . . .  
UniRef100\_A0A413XHM0 . . . . . E L . . F R A L V . . L S N L I T I H Q K . . . . . T . . . . G I G . . . . R L S A Y C G . . A . V S . A G C G A . G C G I A F L L . G . . .  
UniRef100\_A0A414FT31 . . . . . E L . . I R A L V . . L S H L T A I Y I K . . . . . Q . . . . N L G . . . . R L S A L C G . . C . V V . A A T G S . S C G I T Y L M G . G E . .  
UniRef100\_A0A414G090 . . . . . R L . . L R A L A . . L S D L V A I H V K . . . . . S . . . . Y I G . . . . A L S A F C G . . V . V C . A G C G A . G A A I E W M R . G . . .  
UniRef100\_A0A414RYC9 . . . . . K L . . Y R A L A . . L S N L T A I H E K . . . . . T . . . . P I G . . . . R L S A Y C G . . A . V N . A G A G A . G A G I A Y L C . G . . .  
UniRef100\_A0A415E212 . . . . . Q L . . I R A L M . . L S H L M V I Y I K . . . . . Q . . . . S L G . . . . R L S A L C G . . C . V V . A A T G A . S C G I T Y L M G . G D . .  
UniRef100\_A0A415EKW6 . . . . . K L . . Y R A L I . . V S N L I S I H Q K . . . . . R . . . . Y I G . . . . S L S A Y C G . . A . T S . A A C G S . G A G I A Y M M . G . . .  
UniRef100\_A0A415T4U2 . . . . . N L . . Y R A L L . . I S N L M T V H Q K . . . . . L . . . . R I G . . . . R L S A Y C G . . V . V A . A G A G A . G A G I A Y L L . G . . .  
UniRef100\_A0A415X877 . . . . . K M . . Y R A L L . . V S N L V S I Y I K . . . . . H . . . . Y I G . . . . A L S A F C G . . A . V S . A A C G S . G A A I T F M A . G . . .  
UniRef100\_A0A415XE99 . . . . . K M . . F R A L A . . L S N L V A I H E K . . . . . S . . . . G I G . . . . T L S A Y C G . . A . V S . A A T G A . G A G I A Y L Y . D . . .  
UniRef100\_A0A415YM35 . . . . . E L . . L R A L A . . L S C L V T I Y I K . . . . . E . . . . Y S G . . . . R L S A L C G . . C A L A . G G T G T . A C G L V L L F G . G S D . .  
UniRef100\_A0A415YV05 . . . . . E L . . A R A L A . . L S D L I T V H I K . . . . . S . . . . Y I G . . . . R L S P L C G . . S G I A . G G T G S . C C A M I Y L M G . G K . .  
UniRef100\_A0A416EL32 . . . . . Q L . . Y R A L L . . I S N L I S I H L K . . . . . H . . . . G I G . . . . P L S A F C G . . A . V S . A G C A A . G C G I A Y L Q . G . . .  
UniRef100\_A0A416HB65 . . . . . M L . . Y R S L A . . L S I L I T I H A K . . . . . Q . . . . Y I G . . . . R L S V L C G . . C S I A . S A I G V . S G A M V Y L Y G . G T . .  
UniRef100\_A0A416HK58 . . . . . K L . . Y R A L L . . I S N L T A I H L K . . . . . E . . . . G I G . . . . R L S A Y C G . . A . V S . A G T G A . G A G I A Y L M . G . . .  
UniRef100\_A0A416HL10 . . . . . M L . . Y R A L I . . V S N L I S V H Q K . . . . . R . . . . Y I G . . . . N L S A Y C G . . A . V S . A G T A A . V C G I A Y L D . G . . .  
UniRef100\_A0A416JVW4 . . . . . K M . . L R A L T . . L S N L T T I H E K . . . . . T . . . . P I G . . . . R L S A Y C G . . A . V S . A G A C A . G A G I A Y L C . G . . .  
UniRef100\_A0A416Q974 . . . . . K M . . Y R A L V . . V S N L I A I H Q K . . . . . T . . . . Y I G . . . . S L S A Y C G . . A . V S . A A C G A . G A A I S W L N . G . . .  
UniRef100\_A0A416S2B0 . . . . . K M . . I R A V A . . L S D L L T I Y Q R . . . . . Q . . . . F I G . . . . R L S A Y C G . . A . V N . A G C A S . A A G I A Y L E . G . . .  
UniRef100\_A0A416VY79 . . . . . E L . . I R A L T . . L S H L T V I Y I K . . . . . Q . . . . S L G . . . . R L S A L C G . . C . V V . A A T G S . S C G I T Y L M G . G T . .  
UniRef100\_A0A416ZGX8 . . . . . R L . . T R A L A . . L A D L V A I H T K . . . . . S . . . . Y I G . . . . A L S A F C G . . V . V C . A A C G A . G A A I C W M R . G . . .  
UniRef100\_A0A417NH30 . . . . . E L . . Y R A L L . . V S N L V T L H Q K . . . . . T . . . . G I G . . . . R L S A Y C G . . A . V S . A G A G A . G A G I A F L C . G . . .  
UniRef100\_A0A418MG11 . . . . . I L . . L R A L A . . L G H L V N I V V K . . . . . G . . . . Y T G . . . . K L A A V C G . . S G I A . A G V G A . G V G L A W G Y G . G N D . .  
UniRef100\_A0A419T1W2 . . . . . E L . . Y R A L C . . I S N L T A Q D Q K . . . . . Q . . . . Y I G . . . . P L S A Y C G . . V . V C . A A A S A . G A A I T Y L Y . G . . .  
UniRef100\_A0A419TA55 . . . . . K L . . I R A L A . . L S N L M T I Y I K . . . . . T . . . . Y L G . . . . R L S A L C G . . V . V V . A S I G S . S C G I T Y L L G . G K . .  
UniRef100\_A0A420E9F4 . . . . . E Q . . L R A L C . . M S Q L M A I Y I K . . . . . Q . . . . Q O P . . . . A L S A L C A . . A . N T . A A I G S . G A A I T W L L G . G D . .  
UniRef100\_A0A420YXY9 . . . . . E T . . T R A L M . . M S S L M V V V V K . . . . . Q . . . . L L G . . . . R L S C L C G . . M . V V . S G I G T . S A A L V Y L L G . G N . .  
UniRef100\_A0A425VU58 . . . . . E L . . A R A L A . . F G H L V N S Y I N . . . . . A . . . . V V G . . . . K L S A V C T . . C A T A . A S T A A . S A A L V K L W G . G S . .  
UniRef100\_A0A425VYX7 . . . . . E L . . V R A V V . . L S D L T A V H V K . . . . . Y . . . . F I G . . . . E L S A F C G . . A . V S . A S C G A . G A G I C M L R . G . . .  
UniRef100\_A0A425WC06 . . . . . E M . . L R A V A . . L S D L T A I H A K . . . . . R . . . . F I G . . . . E L S A F C G . . V . T T . A A T G A . G A A I C Y L R . G . . .  
UniRef100\_A0A425XYU1 . . . . . T M . . L R A L G . . L G L V L S I H M K . . . . . S . . . . F V G . . . . Q L S A L C G . . V . I L . S T S G A . A C G I T Y M M G . G E . .  
UniRef100\_A0A427URN7 . . . . . R L . . A R A L M . . L S H L S A I Y I H . . . . . Y . . . . Q L P . . . . R L S A L C A . . A . T T . A A M G A . A A G M A W L A E . G . . .  
UniRef100\_A0A428LKM1 . . . . . R L . . A R A L M . . L S H L T A I Y I H . . . . . Y . . . . Q L P . . . . R L S A L C A . . A . T T . A G M G S . A A G M A W L L G . G D . .  
UniRef100\_A0A430A0E4 . . . . . Q L . . I R A L C . . L S H L T A L Y I H . . . . . S . . . . F L P . . . . V L S A Y C A . . T . N S . A A M G S . A A G I C Y L M N . G D . .  
UniRef100\_A0A431I1N7 . . . . . E L . . Y R A L F . . F S H L A T V H I K . . . . . S . . . . R I G . . . . R L S A Y C G . . P . M C . A A G V . A G A I G L I N . D . . .  
UniRef100\_A0A431IVU9 . . . . . I M . . Y R G L I . . F S I L A S V H I K . . . . . A . . . . N I G . . . . R L S A Y C G . . P . M C . A S G A V . A G A I F I N . D . . .  
UniRef100\_A0A431WCD8 . . . . . L L . . A R A L I . . M S H L G A I Y I K . . . . . S . . . . H Y P . . . . P L S A F C G . . N . T V . T S A A A . A M A M V Y L A G . G S . .  
UniRef100\_A0A437S6P3 . . . . . K F . . Y R A L M . . F S N L I S Y L K . . . . . Q . . . . N I G . . . . K L S A Y C G . . V . V S . A A A A S . V I G I F M E . D . . .  
UniRef100\_A0A443YTF2 . . . . . A V . . L E A I A . . L S H I V T A F V K . . . . . A . . . . H T G . . . . R L S A I C G . . C S V A . A G A G A . T A G I T F L L G . G D . .  
UniRef100\_A0A444JRK2 . . . . . T T . . A R A L M . . M S H L M A I Y I K . . . . . S . . . . Y Q N . . . . K L S A L C G . . A . T T . A S M G A . V A G M T W L L G . G R . .  
UniRef100\_A0A448TTT4 . . . . . Q L . . A R A L I . . I S H L G A I Y I K . . . . . S . . . . F Y P . . . . P L S A F C G . . N . T V . T G A A T . A A M V Y L A N . G S . .  
UniRef100\_A0A482PTU1 . . . . . K L . . A R A L M . . L S H L S A I Y I H . . . . . H . . . . Q L P . . . . R L S A L C A . . A . T T . A A M G A . A A G M A W L V D . G R . .  
UniRef100\_A0A484HIQ5 . . . . . T L . . L R A L V . . V S N L V A I H L K . . . . . T . . . . S I G . . . . R L S A Y C G . . A . V S . A G A G A . G A G I A W L H . G . . .  
UniRef100\_A0A486KPW8 . . . . . T L . . A R A L S . . L S H L T A I S I H . . . . . S . . . . R Y T . . . . R L S A L C A . . A . S T . A A M G A . A A G M A W L F T . R D . .  
UniRef100\_A0A486X8W4 . . . . . Q L . . T R A L F . . L S H L M A I Y I H . . . . . S . . . . K L P . . . . K L S A L C A . . A . T T . A A M G S . C A G I A W L L T . G K . .  
UniRef100\_A0A491FMQ0 . . . . . R L . . A K A L A . . I S H L V T G Y I K . . . . . N . . . . Y T G . . . . R L S A Y C G . . C G V A . A S T G A . T A G I S W L M N . G T E . .  
UniRef100\_A0A495RET5 . . . . . T L . . A R A L V . . L S H A I A I Y I H . . . . . S . . . . K F P . . . . P L S A L C A . . A . S T . A S M G A . A A G M V Y L L D N H N . .  
UniRef100\_A0A496NC54 . . . . . K L . . Y R A L V . . L S N L T A I H Q K . . . . . T . . . . G I G . . . . T L S A Y C G . . V . V S . A G A G S . G A G I A Y L C . G . . .  
UniRef100\_A0A497KJ80 . . . . . E L . . A E A L A . . L S H L V T R Y I K . . . . . V . . . . Y T G . . . . L T P I C G . . C A V A . A G A G A . T A A I T K L A G . G T . .  
UniRef100\_A0A497QP83 . . . . . L L . . Y R A V L . . F S H L V N H P C A . . . . . I . . . . N L G . . . . L L S P L C G . . T . I T K A M G A . A S G I I Y L M G . G T L . .  
UniRef100\_A0A498R6S7 . . . . . E I . . V R A V T . . L S H L V T I Y I K . . . . . L . . . . K F G . . . . R L S A L C G . . A . A I . A G M G A . S C G I V Y L L G . G G L . .  
UniRef100\_A0A498R9H5 . . . . . R L . . T R A L L . . L S H M M A I Y I H . . . . . G . . . . K L P . . . . K L S A L C A . . V . S T . A A M G A . A A G M A W L L R . Q D . .  
UniRef100\_A0A498RDK6 . . . . . T L . . Y R A L V . . L T N L L S I H Q K . . . . . R . . . . Y I G . . . . N L S A Y C G . . A . V S . A G A A A . A C G I A Y L H . G . . .  
UniRef100\_A0A4D4IWI1 . . . . . Q Y . . V R A L M . . L S H L V A I Y V K . . . . . S . . . . K Q N . . . . K L S A L C A . . A . T T . A A M G S . T A A L T W L L K . G D . .  
UniRef100\_A0A4Q0V0H1 . . . . . K V . . I R S V A . . L S H L V T I Y I K . . . . . S . . . . Y T G . . . . A L S P V C G . . C G V A . A G V G A . S A G L C Y L M D . G T . .  
UniRef100\_A0A4Q1DCD8 . . . . . E I . . I R A V G . . L S N L V T I Y I K . . . . . S . . . . Q F G . . . . R L S A F C G . . V . T V . A S I G A . A C G I A R L Q G . G T L . .  
UniRef100\_A0A4Q2A3G4 . . . . . K V . . I R A L A . . M S H L I N S Y I K . . . . . Y . . . . Y L G . . . . R L S V C G . . C G V A . S A T G S . A I A I G Y L L G . I H I . .  
UniRef100\_A0A4Q2BNQ7 . . . . . Q L . . L R A L V . . L A N L T A V R I K . . . . . Q . . . . S I G . . . . Y L S A Y C G . . A . I C . A G C S A . A A G V A F L Y . G . . .  
UniRef100\_A0A4Q7VJM1 . . . . . T L . . L R A L A . . L A L L I S I H M K . . . . . S . . . . F I G . . . . Q L S A L C G . . V . I L . S T S G A . A C G I T Y M M G . G D . .  
UniRef100\_A0A4Q9DKZ5 . . . . . T L . . Q R G A A . . L A N L I H I Y M K . . . . . Q . . . . L T G . . . . R L T S S C G . . S . I L . V A M G T . S P A I V W M L G . G S . .  
UniRef100\_A0A4R1J9H0 . . . . . Q R . . L R A L A . . M S H L L A I Y I K . . . . . K . . . . L Q S . . . . P L S A L C A . . A . T T . A A M G S . G A A I N W L L G . G N . .  
UniRef100\_A0A4R1PYR4 . . . . . R L . . S Q A I A . . I S H L V T I Y I K . . . . . I . . . . H T G . . . . S L S A L C G . . C A V A . A A T G A . S A A I T W L L G . E D . .  
UniRef100\_A0A4R1R7W1 . . . . . T L . . Y R A L V . . L S N L T A L L Q K . . . . . R . . . . G I G . . . . R L S A F C G . . A . V C . A A C G S . G A G I T Y L H . G . . .  
UniRef100\_A0A4R2EWO6 . . . . . E L . . A R A L V . . I S N L V S I H I K . . . . . S . . . . K L G . . . . R L S A L C G . . V . S V . A A M A S . S C G I V Y L F G . G S . .  
UniRef100\_A0A4R2FBL1 . . . . . Q L . . L R A L M . . L S H L L A I Y I K . . . . . Q . . . . H Q H . . . . K L S A L C A . . V . T T . A A M G S . A A G I T Y L L G . G D . .  
UniRef100\_A0A4R2K5C7 . . . . . K I . . L R A L A . . L S I L L T V H T K . . . . . H . . . . Y L G . . . . R L S V L C G . . C S I S . S A M G V . A C G I V F M L G . G T . .  
UniRef100\_A0A4R2LYB1 . . . . . T L . . Y R A L A . . L S N L T A I Y Q K . . . . . T . . . . P I G . . . . R L S A Y C G . . A . V S . A G A G A . G A G I A Y L C . G . . .  
UniRef100\_A0A4R3JWV7 . . . . . K L . . L R A T A . . L S Y L V C M P I K . . . . . E . . . . Y S G . . . . R L S A F C G . . C A T A . A G S G M . A C A L V Y L R G . G T V . .  
UniRef100\_A0A4R3L4U5 . . . . . K L . . A R S I A . . L S F L I T I Y I K . . . . . E . . . . Y S G . . . . R L S A F C G . . C A T A . G G I G A . S S G I V Y L L D . G N L . .  
UniRef100\_A0A4R3T7I3 . . . . . Q L . . M R A L I . . I S N L T T L Y Q K . . . . . Q . . . . F I G . . . . R L S A Y C G . . A . V S . A G A G A . G A G I T Y L R . G . . .

UniRef100\_A0A4R3Z6J8 . . . . . Q L . . Y R A L V . . . . . V S N L C T I H Q K . . . . . T . . . . . G I G . . . . . R L S A Y C G . . . . . A . . . . . V S . . . . . A G I G A . . . . . G C G I A Y L K . . . . . G . . . . .  
UniRef100\_A0A4R4AYC2 . . . . . T T . . L R A V T . . . . . L S H L V A I S I H . . . . . A . . . . . R Y A . . . . . R L S A L C A . . . . . A . . . . . S T . . . . . A A M G A . . . . . A A G M A W L F T . . . . . Q D . . . . .  
UniRef100\_A0A4R4E6M5 . . . . . Q R . . I R A V A . . . . . L A N L V H I Y M K . . . . . Q . . . . . M I G . . . . . R L T A V C G . . . . . G . . . . . V L . . . . . V G M G T . . . . . A A A I V W L H G . . . . . G T . . . . .  
UniRef100\_A0A4R4FDN4 . . . . . K M . . Y R A L A . . . . . L S N L V A I H Q K . . . . . T . . . . . G I G . . . . . R L S A Y C G . . . . . A . . . . . V S . . . . . A G A A A . . . . . G A G I A Y L C . . . . . S . . . . .  
UniRef100\_A0A4R5JJ1 . . . . . A T . . A R A L A . . . . . I S H L V N V Y V K . . . . . E . . . . . H L G . . . . . K L S P I C G . . . . . C S . . . . . V S . . . . . A G L G A . . . . . T A A I T W L L G . . . . . G S F . . . . .  
UniRef100\_A0A4R6GS1 . . . . . T L . . Y R A L L . . . . . V S N L I T I H Q K . . . . . T . . . . . G I G . . . . . R L S A Y C G . . . . . A . . . . . V S . . . . . A G I G A . . . . . G A G I A W L D . . . . . G . . . . .  
UniRef100\_A0A4R6PZB2 . . . . . K L . . Y R A L L . . . . . I S N L S A I H L K . . . . . T . . . . . E I G . . . . . R L S A Y C G . . . . . A . . . . . V S . . . . . A G A S V . . . . . G A G I A Y L K . . . . . G . . . . .  
UniRef100\_A0A4R6Q376 . . . . . K L . . Y R A L L . . . . . I S N L S A I H L K . . . . . T . . . . . E I G . . . . . R L S A Y C G . . . . . A . . . . . V S . . . . . A G A S A . . . . . G A G I A Y L K . . . . . G . . . . .  
UniRef100\_A0A4R7B040 . . . . . Q L . . L R A L T . . . . . L S H L M A V Y I H . . . . . S . . . . . R L P . . . . . K L S A L C A . . . . . V . . . . . T T . . . . . A S M G A . . . . . A A G M A Y L L D . . . . . G G . . . . .  
UniRef100\_A0A4R7B5U9 . . . . . R R . . I R A L M . . . . . L A N L M A I Y I K . . . . . S . . . . . Y Q H . . . . . K L S A L C A . . . . . V . . . . . T T . . . . . A A M G S . . . . . A A G M A W L L G . . . . . G D . . . . .  
UniRef100\_A0A4R8M2K0 . . . . . E T . . A R A V A . . . . . F S H L A T S Y V K . . . . . S . . . . . R T G . . . . . R L T P T C G . . . . . C T . . . . . V A . . . . . A G A G A . . . . . A A G I T Y L L T . . . . . K D . . . . .  
UniRef100\_A0A4R9C0K5 . . . . . I L . . Y R G L I . . . . . I S N L V A L H I K . . . . . R . . . . . F I G . . . . . R L S A Y C G . . . . . V . . . . . T S . . . . . A G V A A . . . . . G A G I A Y V E . . . . . T . . . . .  
UniRef100\_A0A4T2AMU8 . . . . . I M . . L E A I A . . . . . L S H L V T A Y V K . . . . . A . . . . . Q T G . . . . . R L S A V C G . . . . . C S V A . . . . . A G A G A . . . . . T A G I T Y L M G . . . . . G T . . . . .  
UniRef100\_A0A4U0ZN87 . . . . . T V . . L R A I G . . . . . L S H I V T A Y V K . . . . . A . . . . . H T G . . . . . R L S A V C G . . . . . C S V A . . . . . A G A G A . . . . . T A G I T Y L V G . . . . . G D . . . . .  
UniRef100\_A0A4U1AB57 . . . . . N V . . L K A I G . . . . . L S H I I T A Y V K . . . . . A . . . . . H T G . . . . . R L S A V C G . . . . . C S V A . . . . . A G A G A . . . . . T A G I T Y L V G . . . . . G D . . . . .  
UniRef100\_A0A4U1B1Y5 . . . . . T V . . L K A I G . . . . . L S H I I T G Y V K . . . . . A . . . . . H T G . . . . . R L S A V C G . . . . . C S V A . . . . . A G A G A . . . . . T A G I A Y L V G . . . . . G D . . . . .  
UniRef100\_A0A4U8Q6N7 . . . . . R L . . L R A L V . . . . . V S N L I T I H Q K . . . . . T . . . . . G I G . . . . . R L S A Y C G . . . . . A . . . . . V S . . . . . A G C G S . . . . . G T G I A Y L M . . . . . G . . . . .  
UniRef100\_A0A4U9P813 . . . . . E L . . A R A L V . . . . . L S N L V T I R I K . . . . . K . . . . . H M G . . . . . R L S P L C G . . . . . A G I A . . . . . G A T G A . . . . . S C G I T Y L L G . . . . . G D . . . . .  
UniRef100\_A0A4U9R5U1 . . . . . K L . . A R A L I . . . . . L S N L I A I H I K . . . . . S . . . . . Y L G . . . . . R L S A L C G . . . . . C . . . . . V V . . . . . A A A G S . . . . . S S G I V Y L L D . . . . . G T . . . . .  
UniRef100\_A0A4V2Q9X5 . . . . . Q K . . I R A L T . . . . . L S H M T A I Y I K . . . . . H . . . . . H L D . . . . . R L S A L C G . . . . . A . . . . . M V . . . . . A A S G V . . . . . S C A V V Y L L G . . . . . G G . . . . .  
UniRef100\_A0A4V2SB21 . . . . . R L . . A K S V A . . . . . I S H I V N S Y I K . . . . . H . . . . . Y I G . . . . . R L S A L C G . . . . . C G V A . . . . . A G T G A . . . . . S V A I A W L M G . . . . . A N E . . . . .  
UniRef100\_A0A4V3RN36 . . . . . K R . . L R A L F . . . . . L S H L M A I Y I H . . . . . S . . . . . K L P . . . . . K L S A L C A . . . . . V . . . . . T T . . . . . A S M G S . . . . . C A G I A Y L L T . . . . . G K . . . . .  
UniRef100\_A0A4V4N705 . . . . . K L . . A R A L M . . . . . L S H L T A I Y I H . . . . . D . . . . . K L P . . . . . P L S A L C A . . . . . V . . . . . T T . . . . . A S M G A . . . . . A A G M A W L L G . . . . . G R . . . . .  
UniRef100\_A0A4V5SD66 . . . . . K L . . A R A L I . . . . . I S H T V T I H I K . . . . . S . . . . . F L G . . . . . R L S A L C G . . . . . V . . . . . L V . . . . . A A T G A . . . . . S A G V V Y L L G . . . . . G N . . . . .  
UniRef100\_A0A4V6RC87 . . . . . E L . . I R A L I . . . . . I S N L T A I Y I K . . . . . Q . . . . . H L G . . . . . S L S A L C G . . . . . C . . . . . V V . . . . . A S T G S . . . . . S C G M T Y L M G . . . . . G T . . . . .  
UniRef100\_A0A4Y1WPX2 . . . . . R T . . R A L V . . . . . L S H L T A I Y I K . . . . . Q . . . . . S L G . . . . . R L S A L C G . . . . . C . . . . . V V . . . . . A A T G S . . . . . S C G I A Y L M G . . . . . G G . . . . .  
UniRef100\_A0A4Y1WYC0 . . . . . R M . . I R A L T . . . . . L S H L T V I Y I K . . . . . Q . . . . . S L G . . . . . R L S A L C G . . . . . C . . . . . V A . . . . . A A T G S . . . . . S C G V T Y L M G . . . . . G G . . . . .  
UniRef100\_A0A4Y6IAG7 . . . . . T L . . A R A L I . . . . . M S H L G A I Y I K . . . . . S . . . . . H Y P . . . . . P L S A F C G . . . . . N . . . . . S V . . . . . T S A A A . . . . . A M A M V Y I A G . . . . . G S . . . . .  
UniRef100\_A0A4Y8L2N7 . . . . . D L . . A R A L I . . . . . M S H L T V I Y I K . . . . . Q . . . . . K L G . . . . . R L S A L C G . . . . . C . . . . . V T . . . . . A A T G S . . . . . S C G I V L L M G . . . . . G E . . . . .  
UniRef100\_A0A4Z0D108 . . . . . E I . . I R A I T . . . . . L S H L V T I Y V K . . . . . A . . . . . H I G . . . . . T L T P V C G . . . . . C S V A . . . . . S G L G L . . . . . S A G L T M L E N . . . . . G N . . . . .  
UniRef100\_A0A4Z0R9A9 . . . . . R L . . I R A V T . . . . . L S N L I A I Y I K . . . . . L . . . . . R I G . . . . . R L S A L C G . . . . . A . . . . . T A . . . . . S G T G A . . . . . S C G I T Y L L G . . . . . G G K . . . . .  
UniRef100\_A0A4Z0V643 . . . . . Q T . . I R A L V . . . . . L S H L T A I Y I K . . . . . Q . . . . . S L G . . . . . K L S A L C G . . . . . C . . . . . V V . . . . . A T T G S . . . . . A C G I C Y L M G . . . . . G E . . . . .  
UniRef100\_A0A509D2G6 . . . . . R L . . A R A L M . . . . . L S H L S A I Y I H . . . . . H . . . . . Q L P . . . . . R L S A L C A . . . . . A . . . . . T T . . . . . A A M G A . . . . . A A G M A W L D . . . . . G R . . . . .  
UniRef100\_A0A509LAY9 . . . . . T L . . F R A L V . . . . . V S N L V T I H Q K . . . . . T . . . . . G I G . . . . . R L S A Y C G . . . . . A . . . . . V S . . . . . A G V G A . . . . . G A G I T W L H . . . . . G . . . . .  
UniRef100\_A0A509LCQ3 . . . . . T L . . F R A L V . . . . . V S N L V T I H Q K . . . . . T . . . . . G I G . . . . . R L S A Y C G . . . . . A . . . . . V S . . . . . A G V G A . . . . . G A G I A W L H . . . . . G . . . . .  
UniRef100\_A0A509LP8P . . . . . K L . . I R A L I . . . . . L S N L M A I H I K . . . . . Q . . . . . Y V G . . . . . Q L T A L C G . . . . . V . . . . . M T . . . . . A S T G A . . . . . A C G I C Y L L G . . . . . G D . . . . .  
UniRef100\_A0A511Z2W9 . . . . . K M . . I R A V A . . . . . L S H L V T I H I K . . . . . S . . . . . K F G . . . . . R L S A L C G . . . . . V . . . . . T T . . . . . A G M G A . . . . . S A A I V Y L L D . . . . . G T L . . . . .  
UniRef100\_A0A518N182 . . . . . T C . . L R A L A . . . . . L S N L T A I H Q K . . . . . T . . . . . G I G . . . . . R L S A Y C G . . . . . A . . . . . V S . . . . . A G A A A . . . . . G T G I A Y L C . . . . . G . . . . .  
UniRef100\_A0A518NJM1 . . . . . K L . . L R A T A . . . . . L S Y L I T M Y I K . . . . . E . . . . . Y S G . . . . . K L S A F C G . . . . . C G I A . . . . . A G T G M . . . . . A C G L A Y L R G . . . . . G G E . . . . .  
UniRef100\_A0A521CRD8 . . . . . K L . . L R A M T . . . . . L A L L V S I Y M K . . . . . S . . . . . F V G . . . . . Q L S A L C G . . . . . V . . . . . L L . . . . . S T T G A . . . . . A C G I T Y I M G . . . . . G N . . . . .  
UniRef100\_A0A521LL13 . . . . . E L . . A R A L L . . . . . V G Q L V G L S L T . . . . . A . . . . . H K S . . . . . R L S A L C G . . . . . A . . . . . F T . . . . . A A I G T . . . . . A C S L V Y L L G . . . . . G S . . . . .  
UniRef100\_A0A522CI92 . . . . . R V . . L R A I A . . . . . F S H I L T A Y V K . . . . . A . . . . . H T G . . . . . R L S A V C G . . . . . C S V A . . . . . A G A G A . . . . . A G G I A Y L M N . . . . . G T . . . . .  
UniRef100\_A0A522KL8C . . . . . T L . . A R A L A . . . . . L S H L V A I S I H . . . . . A . . . . . R Y T . . . . . R L S A L C A . . . . . V . . . . . T T . . . . . A A M G A . . . . . A A G M S W L F S . . . . . K D . . . . .  
UniRef100\_A0A522M0Y6 . . . . . T I . . D E A L A . . . . . L A C I V T A G V T . . . . . H . . . . . R L G . . . . . S L S A M C G . . . . . S A I A . . . . . G G I C V . . . . . A A A L V L L E G . . . . . G G . . . . .  
UniRef100\_A0A524DGQ2 . . . . . K T . . C K A A L . . . . . L S H I T K F T H . . . . . L . . . . . Y S T . . . . . H L S A L C G . . . . . C . . . . . A V K A G I G A . . . . . T A G I T Y L L D . . . . . G S L . . . . .  
UniRef100\_A0A524DSA1 . . . . . K I . . Q R A V L . . . . . L S H I I T S I A D . . . . . K . . . . . Y H G . . . . . H L S L L C G . . . . . A . . . . . A I K A G F G V . . . . . A A S I T Y L L N . . . . . G S H . . . . .  
UniRef100\_A0A524EWE5 . . . . . K I . . Q R A V L . . . . . L S H I I T S I A D . . . . . N . . . . . Y H G . . . . . H L S L L C G . . . . . A . . . . . A I K A G F G V . . . . . A A A I A Y L L D . . . . . G S Y . . . . .  
UniRef100\_A0A524N1Q1 . . . . . E L . . A E A L A . . . . . L S H L V T R E I K . . . . . V . . . . . Y T G . . . . . L T P V C G . . . . . C A V A . . . . . A G A G A . . . . . A A A I V K L A H . . . . . G S . . . . .  
UniRef100\_A0A525D514 . . . . . E V . . L R A I G . . . . . F S H I I T G V V K . . . . . A . . . . . F T G . . . . . R L S A V C G . . . . . C S V A . . . . . A G A G A . . . . . T A G V T Y L L G . . . . . G D . . . . .  
UniRef100\_A0A525D8T0 . . . . . A V . . L R A I G . . . . . L S H I I T A Y V K . . . . . A . . . . . H T G . . . . . R L S A V C G . . . . . C S V A . . . . . A G A G A . . . . . S A G I T Y L V G . . . . . G D . . . . .  
UniRef100\_A0A544QXW4 . . . . . K T . . A R A L A . . . . . I S H L I T A Y I K . . . . . N . . . . . F T G . . . . . R L S P M C G . . . . . C G V A . . . . . A A I G C . . . . . T A G L S W L M G . . . . . A E Q . . . . .  
UniRef100\_A0A550AMM4 . . . . . Q L . . A R A L I . . . . . M S H L G A I Y I K . . . . . S . . . . . Y Y P . . . . . P L S A F C G . . . . . N . . . . . T V . . . . . T S A A A . . . . . A M A M V Y I A S . . . . . G S . . . . .  
UniRef100\_A0A553GAJ5 . . . . . T M . . Y R A L L . . . . . V S N L V T I H Q K . . . . . T . . . . . G I G . . . . . R L S A Y C G . . . . . A . . . . . V S . . . . . A G V G A . . . . . G A G I T Y L Y . . . . . G . . . . .  
UniRef100\_A0A556SYN1 . . . . . T I . . L K S I A . . . . . L S H L V N A Y I K . . . . . C . . . . . H T G . . . . . D L A P I C G . . . . . C A I A . . . . . A G V G A . . . . . A A I V Y Q Q A . . . . . G A . . . . .  
UniRef100\_A0A562JKJ9 . . . . . K I . . I R A V A . . . . . L S H L V T I F V K . . . . . V . . . . . H L G . . . . . A L S P V C G . . . . . C G V A . . . . . A G V G C . . . . . A A G L T F L L D . . . . . G S . . . . .  
UniRef100\_A0A562JRJ7 . . . . . K M . . I R A V A . . . . . L S H L I T I H I K . . . . . S . . . . . K F G . . . . . R L S A L C G . . . . . V . . . . . T A . . . . . A G M G A . . . . . S G A I V Y L L D . . . . . G H L . . . . .  
UniRef100\_A0A564URK6 . . . . . Q L . . L R A L T . . . . . L S N L I S I H Q K . . . . . R . . . . . F I G . . . . . N L S A Y C G . . . . . A . . . . . V S . . . . . A G T A A . . . . . A C G I A Y L Q . . . . . G . . . . .  
UniRef100\_A0A5B0CPU5 . . . . . K M . . I R A V A . . . . . L S H L V T I H I K . . . . . S . . . . . K F G . . . . . R L S A L C G . . . . . V . . . . . T T . . . . . A G M G A . . . . . S A A I V Y L L G . . . . . G T L . . . . .  
UniRef100\_A0A5B7ZGB2 . . . . . E V . . I R A L L . . . . . L S D L V T I A L K . . . . . Q . . . . . G I G . . . . . K L S A Y C G . . . . . A . . . . . V S . . . . . A G C G S . . . . . G A G I A M L E . . . . . H . . . . .  
UniRef100\_A0A5B8Z9B3 . . . . . K M . . L R A V A . . . . . L S H L V T I H I K . . . . . S . . . . . K F G . . . . . R L S A L C G . . . . . V . . . . . T A . . . . . A G M G A . . . . . S A A I V Y L L D . . . . . G S L . . . . .  
UniRef100\_A0A5C0SGK9 . . . . . K L . . A K A V A . . . . . I S H I I N S Y I K . . . . . Y . . . . . Y I G . . . . . R L S A I C G . . . . . C G V A . . . . . A S T G A . . . . . S V A I A W L M G . . . . . A D E . . . . .  
UniRef100\_A0A5C0T1Y8 . . . . . R V . . A R A L A . . . . . I S H L I T A Y I K . . . . . N . . . . . F T G . . . . . R L S P M C G . . . . . C G V A . . . . . A A I G C . . . . . T A G L S W L M D . . . . . A E Q . . . . .  
UniRef100\_A0A5C1QU93 . . . . . E M . . I R A L A . . . . . L S C L M L F F V K . . . . . I . . . . . H I G . . . . . R S A A F C M . . . . . C A I A . . . . . A S A G A . . . . . T A G I C Y L . . . . . K . . . . . G L D . . . . .  
UniRef100\_A0A5C5D7Q5 . . . . . Q L . . A R A L I . . . . . L S H L T A I Y I H . . . . . H . . . . . Q L P . . . . . S L S A L C A . . . . . A . . . . . T T . . . . . A A M G A . . . . . A A G I T W L I E . . . . . G S . . . . .  
UniRef100\_A0A5C6HQN6 . . . . . A L . . I R A L M . . . . . M S H L T V I Y I K . . . . . Q . . . . . S L G . . . . . R L S A L C G . . . . . C . . . . . V V . . . . . A A T G S . . . . . S C G I T Y L M G . . . . . G T . . . . .  
UniRef100\_A0A5C7EPT0 . . . . . R L . . V R A V A . . . . . L A D L V A I H T K . . . . . S . . . . . Y I G . . . . . A L S A F C G . . . . . V . . . . . V C . . . . . A A C G A . . . . . G A A I C W M R . . . . . G . . . . .  
UniRef100\_A0A5C7WBL2 . . . . . E L . . I R A L T . . . . . L S H L T A I Y I K . . . . . Q . . . . . S L G . . . . . R L S A L C G . . . . . C . . . . . V V . . . . . A A T G S . . . . . S C G I T Y L M G . . . . . G T . . . . .  
UniRef100\_A0A5C8EY68 . . . . . K L . . Y R A L V . . . . . L S N L I A I L Q K . . . . . K . . . . . H I G . . . . . K L S A F C G . . . . . V . . . . . V C . . . . . A A T G A . . . . . A S G I A Y L H . . . . . D . . . . .  
UniRef100\_A0A5C8M9N7 . . . . . Q L . . I R A V A . . . . . L S H F V T I H I K . . . . . S . . . . . K F G . . . . . R L S A L C G . . . . . V . . . . . T V . . . . . S G T G A . . . . . S C G I T Y L L G . . . . . G G K . . . . .  
UniRef100\_A0A5C9DNR8 . . . . . K L . . I R A L V . . . . . L A N L V T I R L K . . . . . A . . . . . E I G . . . . . R L S A Y C G . . . . . A . . . . . M S . . . . . A S A G A . . . . . A A G L C Y L A . . . . . G . . . . .  
UniRef100\_A0A5C9DUU7 . . . . . K L . . C E A A L . . . . . L S H L L T K I T H . . . . . L . . . . . Y S T . . . . . H L S A L C G . . . . . C . . . . . A I K A G I G A . . . . . T A G I T F L L G . . . . . G T L . . . . .  
UniRef100\_A0A5D6W1Z3 . . . . . K L . . L R A L V . . . . . L S N L V T L H E K . . . . . E . . . . . G I G . . . . . R L S A Y C G . . . . . A . . . . . V S . . . . . A G A G A . . . . . G A G I A W L C . . . . . G . . . . .  
UniRef100\_A0A5K1J5F7 . . . . . E I . . A R A I V . . . . . I S D L T V I H I K . . . . . E . . . . . Y M G . . . . . R L S P L C G . . . . . A G I A . . . . . G G T G A . . . . . C C G M T Y L Q G . . . . . G G . . . . .  
UniRef100\_A0A5K7YEW8 . . . . . E L . . A E A V A . . . . . L S H M V C G Y L K . . . . . A . . . . . Y I G . . . . . R L T P T C G . . . . . C A V A . . . . . A G A G A . . . . . A A G I V R L L Q . . . . . G T . . . . .  
UniRef100\_A0A5K7YT21 . . . . . T V . . V Q A I G . . . . . L S H I I T A Y V K . . . . . A . . . . . Y T G . . . . . R L S A I C G . . . . . C S V A . . . . . A G A G A . . . . . A A G V T Y L M G . . . . . G T . . . . .  
UniRef100\_A0A5K7ZLE3 . . . . . L V . . I E A I G . . . . . L S H I I T A Y V K . . . . . A . . . . . Y T G . . . . . R L S A I C G . . . . . C S V A . . . . . A G A G A . . . . . T A G I T Y L M G . . . . . G T . . . . .  
UniRef100\_A0A5K7ZZM1 . . . . . M V . . L A A I G . . . . . L S H I I T A Y V K . . . . . A . . . . . H T G . . . . . R L S A I C G . . . . . C S V A . . . . . A G A G A . . . . . T A G V T Y L M G . . . . . G T . . . . .  
UniRef100\_A0A5M7L1B9 . . . . . T L . . A R A L T . . . . . L S H L V A I S V H . . . . . A . . . . . R Y T . . . . . R L S A L C A . . . . . A . . . . . S T . . . . . A A M G A . . . . . A A G M A W L F S . . . . . R D . . . . .  
UniRef100\_A0A5M9NAC5 . . . . . K I . . V R S V A . . . . . L S H L V T I Y I K . . . . . S . . . . . Y T G . . . . . A L S P V C G . . . . . C G V A . . . . . A G V G A . . . . . S A G L S Y L M G . . . . . G N . . . . .  
UniRef100\_A0A5N7ING9 . . . . . T L . . Y R A L I . . . . . L S N L L S M H Q K . . . . . Y . . . . . Y I G . . . . . N L S A Y C G . . . . . A . . . . . V S . . . . . A G A S A . . . . . A C G I A Y L N . . . . . G . . . . .  
UniRef100\_A0A5P0ZTQ0 . . . . . K L . . I R A L T . . . . . L S H L T A I Y I H . . . . . A . . . . . F L P . . . . . V L S A F C A . . . . . A . . . . . D S . . . . . A A M G A . . . . . S V G A C Y L L G . . . . . G D . . . . .  
UniRef100\_A0A5P8E3K1 . . . . . E L . . T R A L M . . . . . L S H L T A I Y I K . . . . . Q . . . . . H L G . . . . . T L S A L C G . . . . . C . . . . . V V . . . . . A S T G A . . . . . S C G I T Y L M G . . . . . G G . . . . .  
UniRef100\_A0A5Q0TH62 . . . . . Q L . . A R A L I . . . . . M S H L G A I Y I K . . . . . S . . . . . Y Y P . . . . . P L S A F C G . . . . . N . . . . . T V . . . . . T S A A A . . . . . S M A L V Y I A G . . . . . G T . . . . .  
UniRef100\_A0A5Q2TCT7 . . . . . T L . . A R A L A . . . . . L S H L T A I S I H . . . . . S . . . . . R Y T . . . . . R L S A L C A . . . . . A . . . . . S T . . . . . A A M G S . . . . . A A G M A W L F T . . . . . R N . . . . .  
UniRef100\_A4Y4Q4 . . . . . K L . . A R A L I . . . . . M S H L G A I Y I K . . . . . S . . . . . H Y P . . . . . P L S A F C G . . . . . N . . . . . T V . . . . . T S A A A . . . . . S M A M V Y I A G . . . . . G S . . . . .  
UniRef100\_A6TX17 . . . . . K M . . A K A L A . . . . . I S H L M N S Y I K . . . . . H . . . . . Y I G . . . . . R L S A L C G . . . . . C G V A . . . . . A G T G A . . . . . S V A I A W L M G . . . . . A K E . . . . .  
UniRef100\_A8MIF4 . . . . . P L . . A Q A L A . . . . . I S H M T N S Y I K . . . . . H . . . . . Y I G . . . . . R L S A L C G . . . . . C G V A . . . . . A G T G A . . . . . S I S I A W L M G . . . . . A D A . . . . .  
UniRef100\_A8RF28 . . . . . L L . . Y R G L L . . . . . V S D L V T I H Q K . . . . . S . . . . . G I G . . . . . R L S A F C G . . . . . A . . . . . V S . . . . . A G V G C . . . . . G A G I A Y M E . . . . . T . . . . .  
UniRef100\_A8RGM5 . . . . . H L . . V K A L A . . . . . I S H S I N V Y I K . . . . . E . . . . . F T G . . . . . K L S A T C G . . . . . C G V S . . . . . A A S A A . . . . . S A S M V W L M G . . . . . G S . . . . .  
UniRef100\_A9A9J5 . . . . . K L . . I K S V L . . . . . L S M L V T Y S T . . . . . Y . . . . . N S S . . . . . Y L S S M C G . . . . . C . . . . . V S K G M G A . . . . . V I G L C Y Y K N . . . . . G K . . . . .  
UniRef100\_A9KNN3 . . . . . K I . . L R A L I . . . . . I S N L I A I Y Q K . . . . . S . . . . . E I G . . . . . R L S A Y C G . . . . . A . . . . . V S . . . . . A A A G A . . . . . G A G I T Y L Y . . . . . G . . . . .  
UniRef100\_B0MUK5 . . . . . H L . . V R A L V . . . . . L S H L T A I Y I K . . . . . Q . . . . . S L G . . . . . R L S A L C G . . . . . C . . . . . V V . . . . . A A T G S . . . . . S C G I T Y L M G . . . . . G G . . . . .  
UniRef100\_B0TUD9 . . . . . Q T . . I R A L M . . . . . L S H L T A I Y I K . . . . . S . . . . . Y Q N . . . . . K L S A L C G . . . . . A . . . . . T T . . . . . A S M G A . . . . . A A G I T Y L L D . . . . . G E . . . . .  
UniRef100\_B0TX30 . . . . . E L . . Y R A L F . . . . . F A I V S T V Y I K . . . . . S . . . . . S I G . . . . . R L S A L C G . . . . . P . . . . . T C . . . . . A S A G I . . . . . A A G L A M M L . . . . . D . . . . .  
UniRef100\_B0VHZ2 . . . . . E L . . I R A L A . . . . . M G H L V S V H I K . . . . . Q . . . . . K I G . . . . . I L S C T I C G . . . . . C . . . . . L S . . . . . A S A G A . . . . . A S G I V M L Y I A G . . . . . G T . . . . .  
UniRef100\_B1C1Q1 . . . . . K L . . Y R A L V . . . . . L A N L L A I H Q K . . . . . N . . . . . G I G . . . . . R L S A Y C G . . . . . A . . . . . V S . . . . . A G C A A . . . . . G S G I A F L H . . . . . G . . . . .  
UniRef100\_B1KQ25 . . . . . Q L . . A R A L I . . . . . L S H L G A I Y I K . . . . . S . . . . . H Y P . . . . . P L S A F C G . . . . . N . . . . . T V . . . . . T S A A A . . . . . S M A M V Y I A G . . . . . G S . . . . .  
UniRef100\_B2KCX0 . . . . . K I . . L K S I A . . . . . F S H L L N G Y V K . . . . . V . . . . . Y T G . . . . . S L S P L C G . . . . . C A I A . . . . . A G V G A . . . . . A G A I V Y Q Q N . . . . . G D . . . . .  
UniRef100\_B7CB13 . . . . . Q L . . Y R A L V . . . . . L S N L T A I Y I K . . . . . T . . . . . G I G . . . . . T L S A F C G . . . . . A . . . . . V S . . . . . A G A A A . . . . . G A G I A Y L H . . . . . D . . . . .  
UniRef100\_B9L7K6 . . . . . E I . . F K A V A . . . . . L S M L I T I Y I K . . . . . L . . . . . F I G . . . . . R L S A I C G . . . . . A A F A . . . . . S G C G V . . . . . A G G I A Y L E S . . . . . N N . . . . .  
UniRef100\_C0D3S7 . . . . . K M . . Y R A L A . . . . . L S H L V T I H Q K . . . . . T . . . . . R I G . . . . . R L S A Y C G . . . . . A . . . . . V S . . . . . A G A G A . . . . . G A G I A Y L C . . . . . G . . . . .  
UniRef100\_C0QFK8 . . . . . D L . . C R A V G . . . . . L S H V V T A F V K . . . . . A . . . . . H T G . . . . . R L A A I C A . . . . . C S V A . . . . . A G A G A . . . . . T A A I T W L L G . . . . . G T . . . . .  
UniRef100\_C2L0B5 . . . . . M L . . Y R A T M . . . . . L S Y L I C T Y I K . . . . . E . . . . . Y S G . . . . . R L S A F C G . . . . . C A I A . . . . . A G T G M . . . . . A C G L V Y L K G . . . . . G T V . . . . .



UniRef100\_C2L0Q0 . . . . . KM . . YRALI . . VSNLVS . . VYIK . . . . . H . . . . . YIG . . . . . ALSAF . . CG . . A . . VS . . ASCGA . . GAGIT . . TYLC . . G . . . .  
UniRef100\_C2MA54 . . . . . ET . . VRALM . . LSNLMV . . IYIK . . . . . Q . . . . . KL . . G . . . . . RLSAL . . CG . . C . . VV . . ASTGA . . ACGLT . . TYLLG . . GN . . . .  
UniRef100\_C5BAM6 . . . . . EL . . ARALA . . LSHLVA . . ISTH . . . . . A . . . . . RYT . . . . . RLSAL . . CA . . A . . ST . . AAMGS . . AAGMA . . WLF . . TS . . HS . . . .  
UniRef100\_C6BST6 . . . . . LL . . IRALI . . LSHLSA . . VHMK . . . . . S . . . . . HL . . G . . . . . KLSAL . . CG . . A . . SL . . AATAS . . CGGIV . . LLLG . . GG . . . .  
UniRef100\_C6L8Z4 . . . . . KM . . YRALV . . VSNLVA . . IHQK . . . . . K . . . . . YIG . . . . . SLSAY . . CG . . A . . VS . . AACGA . . GAAIT . . WMMH . . G . . . .  
UniRef100\_C6LJG2 . . . . . RM . . YRALA . . LSCLV . . TIVH . . VK . . . . . Q . . . . . FIG . . . . . KLSPL . . CG . . GCM . . GSSGA . . CCAFV . . VYLG . . GA . . . .  
UniRef100\_C6Q223 . . . . . QL . . LRATA . . LSYLV . . CMIY . . K . . . . . E . . . . . YSG . . . . . KLSAF . . CG . . CA . . IA . . AGSGM . . ACALV . . VYLRG . . GTV . . . .  
UniRef100\_C6Q2H5 . . . . . KI . . VRAVS . . LSHLVT . . VYIK . . . . . S . . . . . YTG . . . . . ALSPV . . CG . . GVA . . AGVGA . . AAGLT . . TYLWG . . GS . . . .  
UniRef100\_C9KVL1 . . . . . EL . . IRALM . . LSHLTV . . IYIK . . . . . Q . . . . . SLG . . . . . RLSAL . . CG . . C . . VV . . AATGS . . SCGIT . . TWLMG . . GN . . . .  
UniRef100\_C9LDF2 . . . . . EL . . TRALT . . LSHLTA . . IYIK . . . . . M . . . . . RL . . G . . . . . ALSAL . . CG . . C . . VV . . AATGS . . SCGIT . . TYLMG . . GE . . . .  
UniRef100\_C9M8S4 . . . . . EI . . ARAIA . . YSHLAT . . SFIK . . . . . S . . . . . RMG . . . . . RLSPV . . CG . . CAVA . . AGAGA . . AAGIV . . NIMG . . GT . . . .  
UniRef100\_C9MTE5 . . . . . EL . . IRLAT . . LSHLTA . . IYIK . . . . . Q . . . . . SLG . . . . . ALSAL . . CG . . C . . VV . . ASIGS . . SCGIT . . TYLMG . . GD . . . .  
UniRef100\_C9PWI1 . . . . . EL . . IRALI . . ISNLT . . AIYK . . . . . Q . . . . . HLG . . . . . TLSAL . . CG . . C . . VV . . ASTGS . . SCGIT . . TYLMG . . GT . . . .  
UniRef100\_D1B8Y5 . . . . . QV . . ARALA . . LSHLST . . SFIK . . . . . R . . . . . RL . . G . . . . . RLSPV . . CG . . CSVA . . AGAGA . . AAGM . . CLLMG . . GG . . . .  
UniRef100\_D1PPN9 . . . . . RL . . YRALA . . FSGLLT . . VHQK . . . . . E . . . . . YIG . . . . . KLSAF . . CG . . AVS . . ASCAA . . GAAIT . . TYLD . . G . . . .  
UniRef100\_D1PU19 . . . . . EL . . IRLAT . . LSHLTA . . IYIK . . . . . Q . . . . . NLG . . . . . KLSAL . . CG . . C . . VV . . ASTGS . . SCGIT . . TYLMG . . GN . . . .  
UniRef100\_D1VYW2 . . . . . EL . . IRLAT . . LSHLTV . . IYIK . . . . . Q . . . . . SLG . . . . . KLSAL . . CG . . C . . VV . . ASIGS . . SCGIT . . TYLMG . . GD . . . .  
UniRef100\_D1Y6A7 . . . . . EI . . ARAVA . . YSHLAT . . SFIK . . . . . S . . . . . RMG . . . . . RLSPV . . CG . . CAVA . . AGAGA . . AAGIV . . NVMG . . GT . . . .  
UniRef100\_D2MF51 . . . . . RL . . IRLAL . . VSNLVA . . LHIK . . . . . R . . . . . YIG . . . . . RLSAF . . CG . . V . . TS . . AGVAA . . GAAL . . AYLE . . N . . . .  
UniRef100\_D2RIV4 . . . . . KL . . YRALV . . LSNLIA . . IHEK . . . . . T . . . . . GIG . . . . . RLSAY . . CG . . A . . VS . . AGCAA . . GCGIA . . YLH . . G . . . .  
UniRef100\_D2Z6R2 . . . . . ET . . AEAIA . . FSHLST . . IYIK . . . . . S . . . . . RMG . . . . . RLSPV . . CG . . CAVA . . AGAGA . . ASGIV . . RLLG . . GS . . . .  
UniRef100\_D3HWC7 . . . . . EL . . IRLAT . . LSHLTA . . IYIK . . . . . Q . . . . . SLG . . . . . ALSAL . . CG . . C . . VV . . AGIGS . . SCGIT . . TYLMG . . GD . . . .  
UniRef100\_D3IDC4 . . . . . EL . . VRALI . . LSHLTA . . IYIK . . . . . Q . . . . . SLG . . . . . KLSAL . . CG . . C . . VV . . ASIGS . . SCGIT . . TYLMG . . GD . . . .  
UniRef100\_D3LTV6 . . . . . ER . . LRAVT . . LSHMT . . AIYAH . . . . . A . . . . . FL . . P . . . . . KLSAL . . CA . . A . . LT . . ACVGA . . AAGM . . AWLLA . . AQ . . . .  
UniRef100\_D3PCE0 . . . . . EV . . YKAIA . . LSHIVT . . AIYK . . . . . S . . . . . FTG . . . . . RLSAY . . CG . . CSA . . IA . . AGAGA . . AAGIA . . YLLG . . GN . . . .  
UniRef100\_D3S649 . . . . . RL . . IKSIT . . LSHALT . . TIYSA . . . . . Y . . . . . YSS . . . . . YISAM . . CG . . C . . VNR . . GGI . . GA . . VSG . . LSY . . YIF . . G . . . .  
UniRef100\_D3UGV7 . . . . . L . . NRALF . . LSHLTA . . IYIH . . . . . S . . . . . KLP . . . . . KLSAL . . CA . . V . . TT . . AGIGS . . YAGI . . AWLFT . . QN . . . .  
UniRef100\_D4CJP0 . . . . . KL . . LRAL . . LSNLT . . AIYK . . . . . H . . . . . EIG . . . . . RLSAY . . CG . . V . . VN . . AAA . . GA . . GAGIS . . YLR . . G . . . .  
UniRef100\_D4CJV0 . . . . . KR . . FRALI . . ISNLSV . . IYIK . . . . . H . . . . . FIG . . . . . ALSAF . . CG . . A . . VS . . ASCGA . . GAGIT . . YLS . . G . . . .  
UniRef100\_D5EC14 . . . . . ET . . ARAIA . . LSHLTT . . SFIK . . . . . S . . . . . RMG . . . . . RLSPV . . CG . . CSA . . VA . . AGAGA . . AAGM . . TFLS . . GD . . . .  
UniRef100\_D5EER4 . . . . . ET . . SRALS . . IALLI . . IGVIK . . . . . T . . . . . RTG . . . . . ILTPH . . CG . . CSA . . VA . . AGAGA . . ASGIA . . YMLG . . GKE . . . .  
UniRef100\_D5ES46 . . . . . EL . . LRALM . . LSHLTA . . IYIK . . . . . Q . . . . . SLG . . . . . KLSAL . . CG . . C . . VV . . ASIGS . . SCGIT . . TYLMG . . GD . . . .  
UniRef100\_D6GQL7 . . . . . KL . . YRALI . . FANLTI . . VYQK . . . . . K . . . . . GIG . . . . . RLSAY . . CG . . V . . VC . . AASAG . . VAGV . . AFLN . . N . . . .  
UniRef100\_D7NED5 . . . . . EL . . IRLAM . . LSHLTA . . IYIK . . . . . Q . . . . . SLG . . . . . KLSAL . . CG . . C . . VV . . ASIGS . . SCGIT . . TYLMG . . GS . . . .  
UniRef100\_D8DSZ7 . . . . . ET . . IRLGM . . LSHLTA . . IYIK . . . . . Q . . . . . SLG . . . . . KLSAL . . CG . . C . . VV . . ASIGS . . SCGIT . . TYLMG . . GD . . . .  
UniRef100\_D8GIX4 . . . . . IL . . YRALV . . LTNLSI . . LHIK . . . . . R . . . . . YIG . . . . . NLSAY . . CG . . A . . VS . . AGTAA . . ACGIA . . YL . . G . . . .  
UniRef100\_D9R3W3 . . . . . KM . . YRALA . . LSNLAA . . IHQK . . . . . T . . . . . PIG . . . . . RLSAY . . CG . . A . . VN . . AGAGA . . GAGIA . . YLC . . G . . . .  
UniRef100\_E0NUQ4 . . . . . EL . . IRALI . . LSNLT . . AIYK . . . . . Q . . . . . HLG . . . . . TLSAL . . CG . . C . . VV . . ASTGS . . SVGI . . TYLMG . . GT . . . .  
UniRef100\_E0QK30 . . . . . KM . . LRALF . . LAHLIN . . KYVK . . . . . V . . . . . YSG . . . . . KLSGM . . CG . . CA . . IG . . AGV . . G . . V . . CAGM . . TYMLD . . GTN . . . .  
UniRef100\_E1QWD0 . . . . . TL . . VRAVV . . LSDLT . . AVHK . . . . . Y . . . . . FIG . . . . . EL . . SAF . . CG . . A . . VS . . AGCGA . . GGCI . . CYLR . . G . . . .  
UniRef100\_E1R8R6 . . . . . HL . . NRALA . . LSHLTT . . IHMK . . . . . S . . . . . SLG . . . . . RLSAL . . CG . . A . . TL . . AATGA . . ACGFV . . YLLG . . GG . . . .  
UniRef100\_E2SLD3 . . . . . QL . . FRALL . . ISNLS . . TLYQ . . K . . . . . K . . . . . FIG . . . . . RLSAY . . CG . . A . . VS . . AGAGA . . GAGIA . . YLL . . G . . . .  
UniRef100\_E2ZB81 . . . . . DH . . IRALA . . LSHIT . . AIYH . . . . . A . . . . . FYP . . . . . KLSGL . . CA . . T . . AT . . AAMGS . . AAGM . . TLLFD . . GS . . . .  
UniRef100\_E3C6S8 . . . . . QL . . IRLAT . . LSHLTI . . IYIH . . . . . S . . . . . FL . . P . . . . . SLTAY . . CA . . T . . HS . . AAMGA . . ATGI . . CYLAG . . GT . . . .  
UniRef100\_E3CW32 . . . . . DI . . ARALG . . ASHLAT . . SFIK . . . . . R . . . . . RL . . G . . . . . RLSPV . . CG . . CAVA . . AGAGA . . AAGI . . TALLD . . GT . . . .  
UniRef100\_E3CYF9 . . . . . DL . . ARALA . . LGLLV . . GSIK . . . . . A . . . . . QTG . . . . . ILTPH . . CG . . CAVA . . AGCGA . . AAGL . . VLLRR . . GTA . . . .  
UniRef100\_E3H8R8 . . . . . KM . . IRLAF . . LSHALT . . IHK . . . . . T . . . . . NVG . . . . . RLSAY . . CG . . A . . VC . . AAGV . . SGAL . . FLE . . N . . . .  
UniRef100\_E4RJW4 . . . . . EI . . FKATM . . LAHLV . . GHYAK . . . . . I . . . . . YIG . . . . . RLSSL . . CG . . L . . FYA . . AAPGV . . LAALL . . LYL . . A . . DKS . . . .  
UniRef100\_E6VST2 . . . . . TV . . LEAIA . . LSHMVT . . AFIK . . . . . A . . . . . HTG . . . . . RLSAT . . CG . . CSA . . VA . . AGAGA . . TAGI . . TYLLG . . GD . . . .  
UniRef100\_E7G7U8 . . . . . QL . . YRALI . . ISNLC . . TIHQ . . K . . . . . T . . . . . GIG . . . . . RLSAY . . CG . . A . . VS . . AGV . . GA . . GCI . . AYLK . . G . . . .  
UniRef100\_E7NTW9 . . . . . KL . . LRAL . . VSNLIA . . IHQK . . . . . T . . . . . KIG . . . . . RLSAY . . CG . . A . . VS . . AGCGS . . GAAIT . . YMN . . G . . . .  
UniRef100\_E7RMC4 . . . . . EL . . IRLAT . . LSHLTA . . IYIK . . . . . Q . . . . . SLG . . . . . KLSAL . . CG . . C . . VV . . ASIGS . . SCGIT . . TYLMG . . GD . . . .  
UniRef100\_E8LDS6 . . . . . KM . . LRAVL . . LSDLT . . VTYL . . K . . . . . Q . . . . . GIG . . . . . KLSAY . . CG . . A . . IS . . AGCGA . . GAAI . . AF . . LY . . D . . . .  
UniRef100\_F0F417 . . . . . EL . . IRLAV . . LSHLTA . . IYIK . . . . . Q . . . . . SLG . . . . . ALSAL . . CG . . C . . VV . . ASIGS . . SCGIT . . TYLMG . . GD . . . .  
UniRef100\_F0JCR0 . . . . . AV . . LEAVA . . LSHIVT . . AFIK . . . . . A . . . . . HTG . . . . . RLSAT . . CG . . CSA . . VA . . AGAGA . . TAGI . . TYLLG . . GD . . . .  
UniRef100\_F0RYC8 . . . . . KL . . GRALL . . LSQLI . . GLALT . . . . . A . . . . . KKN . . . . . RLSAL . . CG . . A . . FT . . AAI . . GT . . A . . CGLV . . FYLLD . . GT . . . .  
UniRef100\_F0TBF8 . . . . . TL . . IRAVA . . LSNLTI . . IYIK . . . . . S . . . . . SLG . . . . . RLSAL . . CG . . A . . TV . . ASAGS . . CCGI . . TYLMG . . GNN . . . .  
UniRef100\_F2LVU2 . . . . . KT . . TKAVM . . LSCFI . . TSLT . . I . . . . . R . . . . . KFG . . . . . FVSTC . . CG . . V . . VHA . . AAVGV . . IGGIL . . YL . . K . . R . . . .  
UniRef100\_F2NA26 . . . . . AL . . LRALC . . VSNLIA . . QDQK . . . . . S . . . . . YIG . . . . . ALSAY . . CG . . V . . VC . . AAA . . GA . . GAAI . . TYLA . . G . . . .  
UniRef100\_F3AAY4 . . . . . LL . . IRLAV . . VSNLVS . . IHLK . . . . . T . . . . . GIG . . . . . TLSAY . . CG . . A . . IS . . AGCGA . . GAGIT . . YLY . . G . . . .  
UniRef100\_F3BA59 . . . . . KL . . YRALA . . LSNLVT . . IHQK . . . . . S . . . . . GIG . . . . . RLSAY . . CG . . A . . IS . . AGAGA . . GAGIA . . YLL . . G . . . .  
UniRef100\_F3PR02 . . . . . EL . . IRLAM . . LSHLTV . . IYIK . . . . . Q . . . . . SLG . . . . . RLSAL . . CG . . C . . VV . . AATGS . . SCGIT . . TWLMG . . GT . . . .  
UniRef100\_F3QUJ3 . . . . . EL . . IRLAM . . LSHLTA . . IYIK . . . . . Q . . . . . SLG . . . . . VLSAL . . CG . . C . . VV . . ASTGS . . SCGIT . . TYLMG . . GK . . . .  
UniRef100\_F4GH11 . . . . . KL . . IRALA . . CGNLIA . . LHLR . . . . . L . . . . . PMG . . . . . GLSAF . . CG . . V . . VC . . AACGA . . GAGIT . . TYLR . . G . . . .  
UniRef100\_F4GJT0 . . . . . RL . . LRALV . . LSNLIV . . IHLK . . . . . R . . . . . GIG . . . . . RLSAY . . CG . . V . . VC . . AATGS . . GCALT . . TYLD . . G . . . .  
UniRef100\_F4LLB6 . . . . . KL . . LRLAT . . LSNLTA . . IHVK . . . . . T . . . . . PIG . . . . . RLSAY . . CG . . A . . VN . . AGAGA . . GAGIA . . YLS . . G . . . .  
UniRef100\_F4LUK2 . . . . . NI . . IRAVT . . LSLLV . . TVYK . . . . . S . . . . . YTG . . . . . TLPSP . . CG . . GVA . . AGVGA . . SAGIA . . YILG . . GS . . . .  
UniRef100\_F4LUS7 . . . . . KM . . YRGLV . . LSNLTI . . IHLR . . . . . S . . . . . AMG . . . . . RLSAY . . CG . . A . . VC . . AACGS . . GAGIT . . TYLA . . G . . . .  
UniRef100\_F4XCZ3 . . . . . KL . . LRALV . . AANLI . . SIHQ . . K . . . . . S . . . . . YIG . . . . . SLSAY . . CG . . V . . VS . . AACGA . . ACGI . . CYLL . . D . . . .  
UniRef100\_F5T7C5 . . . . . KM . . YRALV . . LSNLVA . . IHQK . . . . . T . . . . . PIG . . . . . RLSAY . . CG . . V . . VN . . AGVGA . . GCGIT . . TYLK . . G . . . .  
UniRef100\_F6DRL7 . . . . . KM . . IRAVA . . LSHLTI . . IYIK . . . . . L . . . . . HTG . . . . . NLSAL . . CG . . CAVA . . AATGA . . SAAIT . . TWLLG . . GK . . . .  
UniRef100\_F7JQN6 . . . . . QL . . YRALV . . IGNLIA . . IHLK . . . . . T . . . . . GIG . . . . . CLSAY . . CG . . A . . TS . . AGCGA . . AAGI . . TYLY . . G . . . .  
UniRef100\_F7NEK3 . . . . . RL . . IRAIA . . LSHVIT . . VYIK . . . . . I . . . . . HTG . . . . . NLSAL . . CG . . CAVA . . AATGA . . SAAI . . AWLLD . . GD . . . .  
UniRef100\_F7NFD1 . . . . . KL . . YRALV . . VSNLIA . . IHQK . . . . . K . . . . . YIG . . . . . SLSAY . . CG . . V . . VS . . AACGS . . GAGIA . . YLL . . D . . . .  
UniRef100\_F7Q0I2 . . . . . QL . . MRALI . . LSDLIA . . VHVK . . . . . T . . . . . NLG . . . . . RLSAF . . CG . . V . . VI . . AGTGA . . AAGI . . SF . . LD . . G . . . .  
UniRef100\_F7UVX8 . . . . . QL . . LRALV . . LSNLVA . . IHQK . . . . . T . . . . . GIG . . . . . RLSAF . . CG . . A . . VC . . AGAAA . . GAGIA . . YLD . . G . . . .  
UniRef100\_F8N6M6 . . . . . EL . . IRLAT . . LSHLTA . . IYIK . . . . . Q . . . . . SLG . . . . . TLSAL . . CG . . C . . VV . . ASTGA . . SCGIV . . YLMG . . GD . . . .  
UniRef100\_F9MQQ2 . . . . . ER . . LRAMV . . LSHVTA . . IYAH . . . . . A . . . . . FL . . P . . . . . KLSAL . . CA . . A . . MT . . ACIGA . . AVGM . . AWLLS . . KK . . . .  
UniRef100\_F9N6H6 . . . . . HT . . LRSAL . . LANVLA . . LIYK . . . . . Q . . . . . YIG . . . . . RLSAY . . CG . . V . . VS . . AASAT . . AAGV . . AFLN . . N . . . .  
UniRef100\_F9R9Y5 . . . . . TM . . IRLAM . . LSHLMA . . IYIK . . . . . S . . . . . HQN . . . . . KLSAL . . CG . . A . . TT . . ASMGA . . VAGM . . TWLLG . . GQ . . . .  
UniRef100\_F9TAG3 . . . . . KT . . CRALV . . MSHLGA . . IYMK . . . . . S . . . . . FYP . . . . . PLSAF . . CG . . N . . TV . . TSSAT . . AMAM . . VYLAG . . GT . . . .  
UniRef100\_F9Z2U9 . . . . . QL . . IRALA . . LSNLVA . . AHIK . . . . . Y . . . . . YMG . . . . . HLSAL . . CG . . I . . LI . . AGTGA . . ASAI . . TYLMG . . GT . . . .  
UniRef100\_G0H2U2 . . . . . KL . . IKSIL . . LSVLVT . . IYAT . . . . . Y . . . . . KSS . . . . . YLSM . . CG . . C . . VSK . . GGM . . T . . VIGL . . CYKN . . GK . . . .  
UniRef100\_G0V3L8 . . . . . KL . . ARAIA . . IRLHTI . . YHIK . . . . . T . . . . . HLG . . . . . RLSPV . . CG . . GVA . . AGIGA . . SCAIT . . TYLLG . . GA . . . .  
UniRef100\_G1UT72 . . . . . EL . . ARAIA . . MSHLAS . . IHIK . . . . . H . . . . . HLG . . . . . RLSAH . . CG . . A . . MV . . AGTAA . . ACGI . . AMLLG . . GG . . . .  
UniRef100\_G1UU44 . . . . . KL . . IRALA . . LSHLVT . . IAIK . . . . . E . . . . . FSG . . . . . PLSPV . . CG . . CA . . IA . . AGVGA . . AVSVA . . WLLG . . CDD . . . .  
UniRef100\_G1WEE9 . . . . . EL . . TRALI . . LSHLTA . . IYIK . . . . . Q . . . . . SLG . . . . . KLSAL . . CG . . C . . VV . . ASIGS . . SCGIT . . TYLMG . . GN . . . .  
UniRef100\_G1WJX7 . . . . . RT . . LRALA . . LADLVA . . IHTK . . . . . S . . . . . YIG . . . . . ALSAF . . CG . . V . . VC . . AACGA . . GAAI . . AWMR . . G . . . .  
UniRef100\_G2FU11 . . . . . QL . . IRAVT . . LSNLIA . . IHIK . . . . . S . . . . . KMG . . . . . RLSAL . . CG . . A . . IA . . SGTGA . . SCGIT . . TYLLG . . GKG . . . .  
UniRef100\_G4D522 . . . . . EL . . YRALV . . FANLIG . . LYLK . . . . . Q . . . . . GIG . . . . . KLSAY . . CG . . V . . VS . . ASASV . . VCGI . . YLYN . . N . . . .  
UniRef100\_G4KPR6 . . . . . RM . . FKAVT . . LSNLMA . . IHIK . . . . . A . . . . . DFG . . . . . LLSGL . . CG . . A . . TI . . AATGA . . ACGI . . VYLG . . GSV . . . .  
UniRef100\_G4L141 . . . . . KL . . LRALV . . VANLIA . . IHQK . . . . . S . . . . . YIG . . . . . SLSAY . . CG . . V . . VS . . AACGA . . ACGI . . CYML . . G . . . .  
UniRef100\_G4Q4Z6 . . . . . AL . . LRSIC . . LSYLV . . CMIY . . K . . . . . E . . . . . YSG . . . . . KLSAF . . CG . . CA . . IA . . AGTGA . . ACGI . . VYLMG . . GGH . . . .  
UniRef100\_G5GAJ6 . . . . . EM . . IRLAM . . LSHLTV . . IYIK . . . . . E . . . . . HLG . . . . . TLSAL . . CG . . C . . VV . . AATGS . . SCGIT . . TYLMG . . GN . . . .  
UniRef100\_G5HEI2 . . . . . EL . . YRALV . . LSNLLG . . LHIK . . . . . A . . . . . GIG . . . . . RLSAY . . CG . . A . . VS . . AGCAA . . GAGIA . . YML . . H . . . .  
UniRef100\_G5IAK3 . . . . . KL . . YRALA . . LSNLTT . . THQK . . . . . T . . . . . LIG . . . . . RLSAY . . CG . . A . . VS . . AGAGA . . GAGIA . . YLC . . G . . . .  
UniRef100\_G7WDA6 . . . . . KL . . FRALI . . ISNLSA . . IHQK . . . . . A . . . . . QIG . . . . . KLSAY . . CG . . A . . VS . . AAGS . . GAGIA . . YLN . . G . . . .  
UniRef100\_G7WJK3 . . . . . QL . . IRAVT . . LSNLIA . . IYIK . . . . . L . . . . . KIG . . . . . RLSAL . . CG . . A . . TA . . SGTGA . . SCGIA . . YLLD . . GGI . . . .  
UniRef100\_G8QSL3 . . . . . KL . . AKALV . . VSELV . . GLSL . . T . . . . . A . . . . . RKD . . . . . RLSAL . . CG . . A . . FT . . AAI . . GC . . ACGI . . VYLLD . . GD . . . .  
UniRef100\_G8QX01 . . . . . CK . . YRALV . . LSNLIA . . IYQK . . . . . T . . . . . NLG . . . . . KLSAY . . CG . . A . . VS . . ASAGS . . GAGIA . . YLH . . K . . . .  
UniRef100\_G8QX20 . . . . . TV . . LKALA . . IANLVA . . IHQK . . . . . Q . . . . . YIG . . . . . DLSAY . . CG . . V . . VC . . AATGS . . ASGVA . . YML . . G . . . .  
UniRef100\_G8QXHO . . . . . EL . . LRALA . . LSNLSM . . QEK . . . . . N . . . . . QLG . . . . . SLSAF . . CG . . A . . VC . . AGTAA . . CCGIA . . YLH . . G . . . .  
UniRef100\_G9WPW8 . . . . . KL . . YRSIL . . VSNLVS . . VYIK . . . . . H . . . . . YIG . . . . . ALSAF . . CG . . A . . VS . . ASCGA . . GAGIT . . YMC . . G . . . .

|                  |            |       |             |            |     |               |     |    |       |       |       |        |
|------------------|------------|-------|-------------|------------|-----|---------------|-----|----|-------|-------|-------|--------|
| UniRef100_G9YIV9 | .....KH..I | RALT  | LSHITAIYIH  | .....S.... | FYP | .....KLSALCA  | ..T | AT | AAMGA | AVGM  | TLIFD | GG..   |
| UniRef100_H0U7D0 | .....QM..I | RAVT  | FSHLLAIWIK  | .....S.... | KFG | .....RLSALCG  | ..V | TV | AGASA | AAAI  | TYLLG | GNL..  |
| UniRef100_H0UNL1 | .....QI..A | ARALA | LSHLSSTFVK  | .....R.... | RLG | .....RLSPVCG  | ..C | SV | AGAGA | AAGM  | CLLLG | GD..   |
| UniRef100_H1DGB7 | .....QL..A | ARALA | LSNLIAAHIT  | .....Y.... | YLG | .....HLSALCG  | ..I | LT | AGTGS | ASAI  | TYLMG | GN..   |
| UniRef100_H1HSG3 | .....KL..Y | RALL  | VSNLVSIIYIK | .....H.... | FIG | .....PLSAFCG  | ..A | VS | AACGA | GAAI  | TYMA  | G....  |
| UniRef100_H1HTE4 | .....RM..L | RALI  | VSNLVSIIYIK | .....H.... | YIG | .....ALSAFCG  | ..A | VS | ASCAG | GAGIS | FLC   | G....  |
| UniRef100_H1Q0Q2 | .....EL..I | RALT  | LSHLTAIYIK  | .....Q.... | SLG | .....TLSALCG  | ..C | VV | ASIGS | SCGI  | TYLMG | GD..   |
| UniRef100_H3KEV9 | .....EL..L | RAVL  | LSDLVTIALK  | .....Q.... | GIG | .....KLSAYCG  | ..A | VS | AGCGA | GAGI  | AMLK  | G....  |
| UniRef100_H5XWU0 | .....KL..F | RAVA  | LADLITIHQK  | .....T.... | SVG | .....RLSAFCG  | ..A | VS | AGCAA | GAGI  | AYLC  | ..N... |
| UniRef100_H9UDX8 | .....KK..E | KAIL  | LSILVTIYIK  | .....A.... | YTG | .....MLTPICG  | ..A | GS | ASAGA | AAGI  | VYLLK | GT..   |
| UniRef100_I2BBH1 | .....RL..A | ARALM | LSHLSAIYIH  | .....Y.... | QLP | .....RLSALCA  | ..A | TT | AAMGA | AAGM  | AWLMD | GR..   |
| UniRef100_I4BXX4 | .....ET..A | ATAVA | LSHLTTSTFLK | .....S.... | RTG | .....RLSPICG  | ..C | TV | AGAGA | AAGI  | TYLLS | KD..   |
| UniRef100_I4C9A0 | .....KL..L | RALA  | LSIIITIVYCK | .....S.... | FTG | .....TLLSPMCG | ..C | AI | AGVGT | SAGV  | AYLLG | GD..   |
| UniRef100_I4DB99 | .....PL..I | RAVT  | LSNLIATYIK  | .....T.... | KIG | .....RLSALCG  | ..A | TA | SGTGA | SCGI  | TYLLG | GGK..  |
| UniRef100_I4Z7Z1 | .....EL..T | RALA  | LSHLTVIYIK  | .....Q.... | SLG | .....RLSALCG  | ..C | VV | ASIGS | SCGI  | TYLMG | GN..   |
| UniRef100_I8TRS2 | .....TL..T | RALV  | LTNLLSLHQQ  | .....R.... | YIG | .....NLSAYCG  | ..A | VS | AGASA | ACGI  | AYLN  | G....  |
| UniRef100_I9DKN7 | .....TL..I | RALM  | LSHMMATYIH  | .....D.... | KLP | .....KLSALCA  | ..V | TT | ASMGA | AAGM  | SWLLK | GD..   |
| UniRef100_I9LEV3 | .....TL..T | RALM  | LSHMMATYIH  | .....D.... | KLP | .....KLSALCA  | ..V | TT | ASMGS | AAGM  | AWLLK | GD..   |
| UniRef100_I9NNL2 | .....SL..I | RALM  | LSHMMATYIH  | .....D.... | KLP | .....KLSALCA  | ..V | TT | ASMGA | AAGM  | AWLLK | ED..   |
| UniRef100_J5W633 | .....KM..L | RAIF  | LANAVNKYVK  | .....L.... | YSG | .....KLSGMCG  | ..C | AI | AGVGT | CAGM  | TYMLG | GNN..  |
| UniRef100_J7IVN5 | .....QI..I | RAVT  | LSNLIATYIK  | .....T.... | KIG | .....RLSALCG  | ..A | TA | SATGA | SCGI  | AYLLG | GGK..  |
| UniRef100_J9GDW5 | .....EL..I | RALM  | LSHLTVIYIK  | .....Q.... | SLG | .....RLSALCG  | ..C | VV | AATGS | SCGI  | TYLMG | GG..   |
| UniRef100_K0G6A3 | .....QL..T | RALF  | LSHLMATYIH  | .....S.... | KLP | .....KLSALCA  | ..V | TT | AAMGS | CAGV  | AWLLT | GK..   |
| UniRef100_K2APZ2 | .....II..I | EEAVA | LSHLINAYAK  | .....V.... | FTG | .....KLAPVCG  | ..C | SV | AGLGA | AAAI  | TYMHD | KS..   |
| UniRef100_K4LJ29 | .....RK..V | RGLV  | FSNLLTLYAK  | .....E.... | FIG | .....RLGGACG  | ..A | AI | AGIVG | AAAT  | WMMLG | GGD..  |
| UniRef100_K6E323 | .....KM..I | RAVA  | LSHLITIHQK  | .....S.... | RFG | .....RLSALCG  | ..V | TA | AGMGA | SGAI  | VYLLD | GGL..  |
| UniRef100_K8W9S4 | .....QL..A | ARALM | LSHLMATYIH  | .....N.... | QLP | .....ALSALCA  | ..A | TT | AAMGA | AAGI  | AWLLD | AR..   |
| UniRef100_K8WJ1  | .....QL..A | ARALM | LSHLMATYIH  | .....N.... | QLP | .....ALSALCA  | ..A | TT | AAMGA | AAGI  | AWLLB | PR..   |
| UniRef100_L0RBQ4 | .....TL..L | LEAIA | LSHLITVYVK  | .....A.... | QTG | .....RLSAVCG  | ..C | SV | AGAGA | TAGV  | TYMLG | GT..   |
| UniRef100_L1NAI7 | .....TT..T | TRAIM | LSLLVTVYIK  | .....Q.... | QLG | .....RLSCLCG  | ..M | VV | SGIGT | ACAL  | VYLLG | GT..   |
| UniRef100_M1E6N6 | .....EV..I | RAVT  | LSHLLTSVVK  | .....S.... | YTG | .....VLSPLCG  | ..C | GI | AGVGC | SAGLT | FLFRE | KN..   |
| UniRef100_M1PWB2 | .....KL..Y | RSLV  | VSNLVTMYIK  | .....S.... | YLG | .....VLSAMCG  | ..A | VA | AGTGS | SIGI  | TYMLG | GD..   |
| UniRef100_M4U7A2 | .....KL..A | RALI  | LSHLGATYIK  | .....S.... | HYF | .....PLSAFCG  | ..N | SA | TSSAA | SMAM  | VYLMG | GS..   |
| UniRef100_M4UMF1 | .....EL..A | RALI  | LSHLSAIYIK  | .....S.... | YYP | .....PLSAFCG  | ..N | TA | TSSAA | AMAM  | VYLMG | GD..   |
| UniRef100_N1ZBI4 | .....KL..Y | RALI  | LSNLIATYIK  | .....T.... | GIG | .....YLSAYCG  | ..A | VS | AGAAA | GAGI  | AYLK  | G....  |
| UniRef100_N2BUJ8 | .....KL..I | RAVA  | MSDLVAVHVK  | .....H.... | YIG | .....ELSAFCG  | ..A | VS | AACGA | GAAI  | TYLR  | G....  |
| UniRef100_Q0W4W4 | .....KL..L | KALA  | ISSTVTVAIK  | .....E.... | HST | .....KLSAFCG  | ..C | VA | ASTGV | AAGT  | VYLLG | GSY..  |
| UniRef100_Q6AQQ3 | .....SV..L | RAIG  | LSHIIATYIK  | .....A.... | HTG | .....RLSAVCG  | ..C | SV | AGAGA | TAGI  | TYLVG | GD..   |
| UniRef100_R5ACV9 | .....KL..L | RAEF  | MGMMLIMYMK  | .....K.... | YVG | .....RLSPVCG  | ..A | ML | AGTGS | AAGM  | AYMMG | GTV..  |
| UniRef100_R5BH02 | .....RL..A | RALI  | LSNLMATYIK  | .....G.... | YLG | .....KLSALCG  | ..C | VT | ASTGS | ACGI  | VFLRG | GS..   |
| UniRef100_R5BSN7 | .....QL..I | RALT  | LSHLTAIYIK  | .....Q.... | SLG | .....RLSALCG  | ..C | VV | AATGS | SCGI  | TYLMG | GG..   |
| UniRef100_R5CBC5 | .....ET..I | RALI  | LSNLTATYIK  | .....Q.... | HLG | .....ALSALCG  | ..C | VV | ASTGS | SCGI  | TYLMG | GN..   |
| UniRef100_R5D1I4 | .....RL..L | RALV  | VSNLITIHQK  | .....T.... | PIG | .....RLSAFCG  | ..A | VS | AGCGA | AAGV  | AWLLI | D....  |
| UniRef100_R5D3N9 | .....EL..L | RALA  | VANLVTIHLK  | .....T.... | GIG | .....RLSAYCG  | ..A | VS | AGCGA | AAAG  | LAYLQ | G....  |
| UniRef100_R5DGG3 | .....QT..A | ATALA | ISSMITIYIK  | .....A.... | HIK | .....RMTAFCG  | ..C | GV | AATGM | TAAV  | SYLLG | GSY..  |
| UniRef100_R5GEI3 | .....EM..I | RALM  | LSHLTAIYIK  | .....Q.... | HLG | .....TLSALCG  | ..C | VV | ASTGS | SCGI  | TYLMG | GG..   |
| UniRef100_R5GWZ7 | .....AL..Y | RSLA  | LSILVTIHVK  | .....H.... | YIG | .....RLSVLCG  | ..C | SV | SSIGV | CAAM  | IFLGD | GS..   |
| UniRef100_R5IAL6 | .....QL..I | RALT  | LSHLTVIYIK  | .....Q.... | SLG | .....YLSALCG  | ..C | VV | AATGS | SCGI  | TYLMG | GD..   |
| UniRef100_R5IHT1 | .....KM..Y | RALA  | LSNLMATYIK  | .....T.... | PIG | .....RLSAYCG  | ..A | VS | AGAGA | GAGI  | AYLC  | G....  |
| UniRef100_R5IJT6 | .....TL..Y | RALA  | VSNLSTIHQK  | .....A.... | HIG | .....TLSAYCG  | ..A | VS | AGCGA | GAGI  | TYLY  | G....  |
| UniRef100_R5LQS8 | .....ET..I | RALI  | LSNLTATYIK  | .....Q.... | HLG | .....SLSALCG  | ..C | VV | ASTGS | SCGI  | TYLMG | GS..   |
| UniRef100_R5LUG8 | .....KL..Y | RALL  | VSDLTITLHQQ | .....T.... | GIG | .....RLSAYCG  | ..A | VS | AGAGA | GAGI  | AYLA  | G....  |
| UniRef100_R5M5F0 | .....QL..L | RALA  | VSNLIALHQQ  | .....K.... | YIG | .....SLSAYCG  | ..A | VS | AACGA | GAGI  | AWMF  | G....  |
| UniRef100_R5MFC7 | .....EL..T | RALI  | LSHLTAIYIK  | .....Q.... | SLG | .....RLSALCG  | ..C | VV | AATGS | SCGI  | TYLMG | GG..   |
| UniRef100_R5QVY3 | .....DL..Y | RALV  | VSNLSTLHQQ  | .....E.... | GIG | .....RLSAYCG  | ..A | VS | AGCGA | GAGI  | AWLLI | G....  |
| UniRef100_R5R9I7 | .....NI..L | KATA  | LSILVTIHTK  | .....H.... | YLG | .....RLSVLCG  | ..C | SV | AAIGV | VCGV  | VRMLG | GS..   |
| UniRef100_R5TDG1 | .....KI..Y | RALA  | VANLIAVHQQ  | .....Y.... | YIG | .....SLSAYCG  | ..A | VC | AAAAG | VSGI  | AFLE  | G....  |
| UniRef100_R5WS06 | .....KL..I | RALI  | LSNLIATYIK  | .....Y.... | RIG | .....RLSAYCG  | ..A | VS | AAAAG | GAGI  | TYLY  | G....  |
| UniRef100_R6ACZ6 | .....EM..T | RALM  | LSHLTAIYIK  | .....Q.... | NLG | .....TLSALCG  | ..C | VV | AATGS | SCGI  | TYLMG | GG..   |
| UniRef100_R6BEE9 | .....EL..I | RAVI  | LSDLTITHQQ  | .....S.... | KIG | .....RLSAFCG  | ..A | IS | AGCGA | AAGI  | AYLL  | G....  |
| UniRef100_R6BNM8 | .....QM..M | RAVT  | LSNLMGIIYIK | .....S.... | QFG | .....RLSAFCG  | ..A | TV | AGIGS | SCGI  | AYLLG | GGL..  |
| UniRef100_R6CEX6 | .....DQ..I | RALI  | LSHLTVIYIK  | .....Q.... | SLG | .....RLSALCG  | ..C | VV | AATGS | SCGI  | TYLMG | GG..   |
| UniRef100_R6CRH6 | .....EL..L | RATA  | LSFLICMYIK  | .....E.... | YSG | .....KLSAFCG  | ..C | AI | AGTGA | ACGL  | AFLDG | AEK..  |
| UniRef100_R6DX46 | .....EL..I | RALT  | LSHLTAIYIK  | .....Q.... | SLG | .....KLSALCG  | ..C | VV | ASIGS | SCGI  | TYLMG | GD..   |
| UniRef100_R6ES56 | .....LL..Y | KALA  | VSNLISIHQK  | .....H.... | HIG | .....KISAFCG  | ..A | VS | ASCAS | AAAV  | AYLK  | G....  |
| UniRef100_R6F8Q0 | .....EL..I | RALT  | LSHLTAIYIK  | .....Q.... | NLG | .....KLSALCG  | ..C | VV | ASIGS | SCGI  | TYLMG | GN..   |
| UniRef100_R6GFV4 | .....TL..Y | RALV  | LSNLIATYIK  | .....N.... | GIG | .....PLSAFCG  | ..A | VC | AGCAS | GAAI  | AYLL  | G....  |
| UniRef100_R6IAL3 | .....KL..Y | RALA  | LANLVTIHEK  | .....T.... | PIG | .....VLSAFCG  | ..A | VS | AGAGA | GAGI  | AYLH  | G....  |
| UniRef100_R6PJ67 | .....TL..Y | RALA  | LSNLTITHQQ  | .....T.... | GIG | .....RLSAYCG  | ..A | VS | AGAGA | GAGI  | AYLC  | G....  |
| UniRef100_R6QZ08 | .....EL..I | RALM  | LSHLTAIYIK  | .....Q.... | SLG | .....KLSALCG  | ..C | VV | ASIGS | SCGI  | TYLMG | GD..   |
| UniRef100_R6RRH2 | .....KM..Y | RALA  | LSNLTITHQQ  | .....T.... | PIG | .....RLSAFCG  | ..A | VS | AGAGA | GAGI  | AYLN  | G....  |
| UniRef100_R6SUK7 | .....KL..A | RALI  | LSNLIATYIK  | .....G.... | YLG | .....RLSALCG  | ..C | VV | ASTGS | SCGL  | VWIKG | GG..   |
| UniRef100_R6TKV7 | .....EL..L | RALA  | VADLVTIHQK  | .....T.... | GIG | .....RLSAFCG  | ..A | VS | AGCGA | AAGV  | AYLL  | G....  |
| UniRef100_R6WIA0 | .....EL..Y | RALV  | FSGLTTTYQK  | .....M.... | FIG | .....KLSAFCG  | ..A | VS | ASCAS | AAAI  | TYLC  | G....  |
| UniRef100_R6WIM5 | .....KL..L | RATA  | LSYLVCMYIK  | .....E.... | YSG | .....KLSAFCG  | ..C | AI | AGTGM | ACAL  | VYLRG | GTT..  |
| UniRef100_R6X2B6 | .....EL..I | RALT  | LSHLTAIYIK  | .....Q.... | SLG | .....RLSALCG  | ..C | VV | ASIGS | SCGI  | TYLMG | GS..   |
| UniRef100_R6XH18 | .....EL..I | RALM  | LSHLTAIYIK  | .....Q.... | SLG | .....KLSALCG  | ..C | VV | ASIGS | SCGI  | TYLMG | GD..   |
| UniRef100_R6XH36 | .....EL..I | RALV  | MSNLTATYIK  | .....Q.... | NLG | .....TLSALCG  | ..C | VV | ASTGS | SCGI  | TYLMG | GN..   |
| UniRef100_R6XLK2 | .....KT..Y | RALA  | LSNLMATYIK  | .....T.... | GIG | .....RLSAYCG  | ..A | VS | AGAGA | GAGI  | AYLC  | G....  |
| UniRef100_R6YNU0 | .....EL..I | RALT  | LSHLTVIYIK  | .....Q.... | SLG | .....RLSALCG  | ..C | VV | AATGS | SCGI  | TYLMG | GG..   |
| UniRef100_R6ZPY0 | .....RL..L | RALA  | LSDLVAIHVK  | .....S.... | YIG | .....ELSAFCG  | ..A | VC | AACGA | GAGI  | TYMWS | G....  |
| UniRef100_R7A8V9 | .....KT..Y | RALA  | LSNLTATYIK  | .....T.... | PIG | .....RLSAFCG  | ..A | VS | AGAGA | GAGI  | AYLC  | G....  |
| UniRef100_R7CZU5 | .....EL..Y | RALA  | LSHLTVIYIK  | .....Q.... | SLG | .....RLSALCG  | ..C | VV | AATGS | ACGI  | TYLMG | GT..   |
| UniRef100_R7D3W1 | .....RL..Y | RAVM  | LSDLIAVHVK  | .....S.... | YIG | .....ALSAFCG  | ..A | IC | AACGA | GAAI  | TYLC  | G....  |
| UniRef100_R7D3Y4 | .....KL..C | RSLV  | VSNLIAIHQK  | .....Y.... | YIG | .....SLSAYCG  | ..A | VS | AACGA | GAGI  | TYMY  | G....  |
| UniRef100_R7DCY6 | .....EL..I | RALI  | LSHLTVIYIK  | .....Q.... | SLG | .....RLSALCG  | ..C | VV | AATGS | SCGI  | TYLMG | GK..   |
| UniRef100_R7ECU3 | .....TM..Y | RALV  | LSNLTITHQQ  | .....E.... | GIG | .....RLSAYCG  | ..A | VS | AGCGC | GAGI  | AYLY  | G....  |
| UniRef100_R7GDN4 | .....AM..L | RALI  | VSDLTITLHQQ | .....K.... | EIG | .....RLSAFCG  | ..A | TL | AAIGA | ACGI  | CYLK  | G....  |
| UniRef100_R7J033 | .....HT..I | RALT  | LSHLTAIYIK  | .....Q.... | SLG | .....RLSALCG  | ..C | VV | AATGS | SAGI  | CYLMG | GD..   |
| UniRef100_R7KN91 | .....KL..A | RALI  | LSHLGATYIK  | .....S.... | HYF | .....SLSAFCG  | ..N | TA | TSSAV | AMAL  | VYLLS | GT..   |
| UniRef100_R7LE14 | .....EM..T | RALM  | LSHLTAIYIK  | .....Q.... | NLG | .....TLSALCG  | ..C | VV | AATGS | SCGI  | TYLMG | GT..   |
| UniRef100_R7P9Q6 | .....EM..L | RALM  | LSHLTAIVVK  | .....Q.... | NLG | .....ALSALCG  | ..C | VV | ASTGS | SCGI  | TYLMG | GG..   |
| UniRef100_R9IHK8 | .....KL..Y | RSLI  | FSSLLTIYQK  | .....E.... | FIG | .....KLSAFCG  | ..A | VS | ASCAS | AAAI  | TYLE  | N....  |
| UniRef100_R9KQV6 | .....TL..Y | RALA  | VSNLVTIHLK  | .....T.... | GIG | .....PLSAFCG  | ..A | TS | AGCGA | AAGI  | SYLF  | G....  |
| UniRef100_R9LK03 | .....KL..Y | RALL  | VSDLTITHQQ  | .....S.... | GIG | .....RLSAYCG  | ..A | VS | AGVGA | GAGI  | AYLL  | D....  |
| UniRef100_R9LSX6 | .....TM..Y | RALV  | VSNLVALHQQ  | .....R.... | GIG | .....RLSAFCG  | ..A | VC | AACGS | GAGI  | TYLH  | G....  |
| UniRef100_R9MC34 | .....KM..Y | RALA  | LSNLTATYIK  | .....T.... | GIG | .....RLSAYCG  | ..A | VS | AGAAA | GAGI  | AYLM  | G....  |
| UniRef100_R9MFU5 | .....LL..L | RATA  | LSYLITMYIK  | .....E.... | YSG | .....KLSAFCG  | ..C | GI | AGCGM | ACGL  | AFLLG | AKE..  |
| UniRef100_R9MHL4 | .....TM..L | RAVT  | LSDLTITHQQ  | .....T.... | GIG | .....RLSAYCG  | ..A | VS | AGCGA | GAAI  | AWLQ  | G....  |
| UniRef100_R9MSX2 | .....VL..L | RATA  | LSYLITMYIK  | .....E.... | YSG | .....KLSAFCG  | ..C | GI | AGTGM | ACGL  | AYMRG | ADE..  |
| UniRef100_R9NAH4 | .....DI..I | KRAIA | FSHMITIYVK  | .....S.... | YLG | .....ALSPVCG  | ..C | VA | AGVGC | TAGLT | FLFRE | GT..   |
| UniRef100_R9NHG8 | .....KI..T | YRALL | LSNLTATYIK  | .....A.... | GIG | .....TLSAYCG  | ..A | VS | AGAAA | GAGI  | AYLH  | G....  |
| UniRef100_R9NLL3 | .....KT..Y | RALA  | LSNLTATYIK  | .....T.... | GIG | .....RLSAYCG  | ..A | VS | AGAAA | GAGI  | AYLC  | G....  |



UniRef100\_R9PQG9 . . . . . AF . . VRALM . LSHLVAIYVK . . . . . S . . . . KQN . . . . KLSALCA . A . TT . AAMGA . SAALTWLMG . GK . .  
UniRef100\_S2YDF7 . . . . . EL . . LRALC . VSNLIAQDQK . . . . . R . . . . YIG . . . . ALSAYCG . V . VC . AAAGA . GAAITYLC . G . . .  
UniRef100\_S3JMX3 . . . . . KL . . I RALV . LANLIAALVYK . . . . . Q . . . . YIG . . . . SLSAFCG . A . VC . AATGA . CGGITYLH . G . . .  
UniRef100\_S8F9Z3 . . . . . EL . . I RALT . LSHLTVIYK . . . . . Q . . . . SLG . . . . RLSALCG . C . VV . ASTGS . SCGITYLMG . GN . . .  
UniRef100\_U1Y408 . . . . . EL . . S RALA . ISELVVCYHLK . . . . . E . . . . YMG . . . . RLSPLCG . SGIA . GGTGA . CCGMTYLOQ . GT . . .  
UniRef100\_U2B5S0 . . . . . KL . . YRALV . LSNLTAIHQK . . . . . S . . . . GIG . . . . RLSAYCG . A . VS . AGCAA . GAGIAYLG . G . . .  
UniRef100\_U2BQN1 . . . . . GL . . YRALV . AGNLIISLHOK . . . . . K . . . . YIG . . . . SLSAYCG . A . VS . AACGS . GVGIAYML . G . . .  
UniRef100\_U2BR63 . . . . . KM . . YRALV . LSNLIAIHQK . . . . . T . . . . GIG . . . . PLSAYCG . A . VS . AGCAS . GAAIAYLN . G . . .  
UniRef100\_U2EG06 . . . . . KL . . I RATT . LSHLTIYVVK . . . . . S . . . . KFG . . . . RLSALCG . A . TI . AATGA . SCGIVYLLD . GDK . .  
UniRef100\_U2IN24 . . . . . EL . . I RALT . LSHLTAIYIK . . . . . Q . . . . SLG . . . . ALSALCG . C . VV . ASIGS . SCGITYLMG . GD . . .  
UniRef100\_U2IPU0 . . . . . QT . . T RAIM . MSSLLVVIYK . . . . . Q . . . . LLG . . . . RLSCLCG . M . VV . SGIGS . ACAVTYLMG . GT . . .  
UniRef100\_U2LC73 . . . . . RR . . N RGLL . FGHLMNELVK . . . . . V . . . . YSG . . . . KLSGMC . CAIG . SGIGA . VAGIWMVLG . GGI . .  
UniRef100\_U2SXB7 . . . . . AL . . M RALA . VSDLTITIHQK . . . . . T . . . . GIG . . . . RLSAFCG . A . VS . AGCGA . ACGIAYLD . G . . .  
UniRef100\_U2TE26 . . . . . QL . . L RATA . LSFVLCMYIK . . . . . E . . . . YSG . . . . KLSAFCG . CAIA . AGTGM . ACGLVLLRG . GST . .  
UniRef100\_U4KEH0 . . . . . SL . . A RALI . MSHLGAIIYK . . . . . S . . . . HYP . . . . PLSAFCG . N . TV . TSSAA . AMAMTYLAG . GT . . .  
UniRef100\_U5MNA1 . . . . . KL . . Y RAVA . LSDLVTIHQK . . . . . T . . . . GIG . . . . RLSAYCG . A . VS . AGAGS . GAGIAYLH . G . . .  
UniRef100\_U7UAT0 . . . . . KI . . I RAVA . LSLFVLTIFAK . . . . . C . . . . HIG . . . . RLSPVCA . CSA . ASLGV . AAGCFLCD . LEN . .  
UniRef100\_U7UUA7 . . . . . TR . . L RALI . LASMTAIYIH . . . . . G . . . . YLP . . . . KLSAFCA . T . VT . AAMGA . AAGMAWLLD . RE . .  
UniRef100\_U7UZ37 . . . . . RL . . G RALF . FAHIINRIVVK . . . . . E . . . . YSG . . . . KLSGIC . CAIG . AAVGA . SAAITWMLG . GTD . .  
UniRef100\_UPI0001A275D4 . . . . . KL . . Y RALV . LGNLTITIHQK . . . . . T . . . . GIG . . . . RLSAYCG . A . VS . AGCAA . GCGIAYLY . G . . .  
UniRef100\_UPI0001BACF7A . . . . . KL . . A RALI . MSHLGAIIYK . . . . . S . . . . HYP . . . . TLSAFCG . N . TA . TSSAA . AMAMTYLAG . GS . . .  
UniRef100\_UPI0002088B6F . . . . . HL . . I RALM . LSHLMAIYIK . . . . . S . . . . HQN . . . . KLSALCG . A . TT . ASMGA . VSGITWLLG . GN . . .  
UniRef100\_UPI000230D429 . . . . . QL . . A RALI . MSHLGAIIYK . . . . . S . . . . HYP . . . . PLSAFCG . N . TV . TSSAA . SMAMTYLAG . GS . . .  
UniRef100\_UPI00023278AC . . . . . QL . . Y RALI . FANLLGLMYK . . . . . Q . . . . GIG . . . . KLSAYCG . V . VS . ASSAS . VAGIAFLS . G . . .  
UniRef100\_UPI00024355AF . . . . . AR . . A RPPG . LSRRRRLRP . . . . . A . . . . GLP . . . . VLSAFCA . A . TT . AAMGA . AGICLVLD . GS . . .  
UniRef100\_UPI000283269A . . . . . KM . . A RALM . LSHLLAIYIH . . . . . H . . . . KFP . . . . ALSALCA . A . TT . ASMGA . AGAIAWLME . ER . . .  
UniRef100\_UPI000288D204 . . . . . TL . . A RGLA . ISHLITYYIK . . . . . S . . . . HLG . . . . RLSALCG . CGVA . ASIGA . SAAMTYMMG . GK . . .  
UniRef100\_UPI000289A50F . . . . . TI . . T RALT . MSNLSIYMH . . . . . S . . . . YLG . . . . RLSALCG . A . VL . AGASV . STALTFLG . GN . . .  
UniRef100\_UPI0002DD0778 . . . . . KL . . Y RSLI . FANLLGLYIK . . . . . E . . . . GIG . . . . ELSAYCG . V . VS . AASAS . VCGLAFLMR . D . . .  
UniRef100\_UPI0002E7D406 . . . . . QL . . A RGLI . LSHLAAIYIK . . . . . S . . . . FYP . . . . PLSAFCG . N . TV . TSSAA . SMAMTYLAG . GN . . .  
UniRef100\_UPI0002E871F4 . . . . . TL . . R RAVF . LGHAVNNVVK . . . . . K . . . . YTG . . . . KLSALCG . CAIA . AGIGA . GAGVSWLLG . GKD . .  
UniRef100\_UPI0002F55F5A . . . . . KL . . Y RALT . LSNLIAIHQK . . . . . Q . . . . GLG . . . . KLSAYCG . A . VS . AACGA . GAGIAYLH . G . . .  
UniRef100\_UPI0002FE0D91 . . . . . QL . . A RALI . LSHLGAIIYK . . . . . Q . . . . HYP . . . . PLSAFCG . N . TV . TSASA . AMAMTYLAG . GS . . .  
UniRef100\_UPI000306AC01 . . . . . KL . . Y RSLI . FANLLGLYIK . . . . . E . . . . GIG . . . . ELSAYCG . V . VS . AAAAS . ICGLAFLMK . G . . .  
UniRef100\_UPI00030F9BF7 . . . . . LL . . A KSLF . FAHCLNRYVK . . . . . E . . . . YSG . . . . KLSGMC . CGIA . SSIGS . TAGIYMLG . GNS . . .  
UniRef100\_UPI00033F2D2A . . . . . QL . . I RQAT . LSHLTAIYIH . . . . . S . . . . FLF . . . . VLSAFCA . T . DS . AAMGA . AAGVVCCLYD . GT . . .  
UniRef100\_UPI00035C15F2 . . . . . EL . . A RALI . LSHLTAIYIK . . . . . Q . . . . SLG . . . . RLSALCG . C . VV . AATGA . SCGITYLMG . G . . .  
UniRef100\_UPI0003605297 . . . . . KL . . A RALA . LSNLVTVHIK . . . . . Q . . . . YIG . . . . RLSPLCG . SGIA . GGVGA . NSGITYLMG . GS . . .  
UniRef100\_UPI000360BBA6 . . . . . QV . . LEAVA . LSHVITAYVK . . . . . A . . . . HFG . . . . RLSAVCG . CSAVA . AGAGA . TAGVTHLLG . GD . . .  
UniRef100\_UPI000373389A . . . . . KM . . I RAVA . FSHLLAIWIK . . . . . S . . . . KFG . . . . RLSALCG . V . TV . AGASA . AAAITYLLG . GDV . . .  
UniRef100\_UPI00036711A8 . . . . . QL . . A RALI . MSHLGAIIYK . . . . . S . . . . HYP . . . . PLSAFCG . N . TV . TSAAA . GMALTYLAG . GT . . .  
UniRef100\_UPI000369B3C4 . . . . . EL . . L RAVA . ISHLLNVVYK . . . . . I . . . . HTG . . . . NLSALCG . CAVA . AATGA . TAAVTWLM . PD . . .  
UniRef100\_UPI00036A4FE1 . . . . . VV . . IEALA . LSHMITAYIK . . . . . A . . . . YTG . . . . RLSALCG . CSAVA . AGAGA . AAGVAYLLG . GT . . .  
UniRef100\_UPI00036E7A0B . . . . . QK . . I RALM . LSSLVVIYK . . . . . Q . . . . KLG . . . . RLSALCG . C . VV . ASTGS . SSGITYLMG . GT . . .  
UniRef100\_UPI00037081CA . . . . . RL . . Y RALV . LANLLSLHOK . . . . . R . . . . YIG . . . . NLSAYCG . A . VS . AGAAA . ACGIAYLO . G . . .  
UniRef100\_UPI000372957C . . . . . IL . . L RATA . LSLFLITMYIK . . . . . E . . . . HSG . . . . RLSAFCG . CGIA . GGTGA . ACAIGYK . ADY . . .  
UniRef100\_UPI0003733871 . . . . . TL . . L RALA . LSNLIAIHQK . . . . . R . . . . FIG . . . . NLSAFCG . V . TC . AATGA . ACGVAYLLG . LSRQ . . .  
UniRef100\_UPI0003747996 . . . . . AL . . A RALA . LSNLITVHIK . . . . . H . . . . YIG . . . . RLSPLCG . SGIA . GGVGA . GSGIYLMG . GT . . .  
UniRef100\_UPI0003789E31 . . . . . RL . . A RALA . LSHLVAIYIK . . . . . H . . . . FAD . . . . RLSAFCG . A . VT . AAAGA . ACGISFLMG . GS . . .  
UniRef100\_UPI000378C8B9 . . . . . EL . . I RGLT . LSHLSAIYIK . . . . . Q . . . . SLG . . . . KLSALCG . C . VV . ASIGS . SCGITYLMG . GD . . .  
UniRef100\_UPI00037A28E8 . . . . . TL . . Y RALV . LTNLLSLHOK . . . . . R . . . . YIG . . . . NLSAYCG . A . VS . AGAAA . ACGIAYLD . G . . .  
UniRef100\_UPI00037A36CB . . . . . YL . . Y RALL . VSNLLAIHOK . . . . . K . . . . YIG . . . . KLSAFCG . A . VS . AGYAC . GAAITYML . G . . .  
UniRef100\_UPI000380DDF . . . . . KL . . L RALV . VSNLVAIYK . . . . . R . . . . YIG . . . . SLSAYCG . V . VS . AACGA . ACGICYLL . D . . .  
UniRef100\_UPI0003819044 . . . . . KL . . Y RALT . LSNLIAIHEK . . . . . S . . . . GIG . . . . RLSAYCG . A . VS . AGCAA . GAGIAYLH . D . . .  
UniRef100\_UPI0003981C8F . . . . . KA . . Y RALV . LSNLIAIYQK . . . . . K . . . . GLG . . . . KLSAYCG . A . VS . AAAAS . GAAITYLC . G . . .  
UniRef100\_UPI0003A134FF . . . . . KT . . I RAVA . LSHLIAIFVK . . . . . Y . . . . QFG . . . . RLSALCG . V . TI . AGASS . AAAITYLLD . GTK . . .  
UniRef100\_UPI0003A4ECDD . . . . . EL . . I RGLF . MSHLMTIHIK . . . . . T . . . . NVG . . . . RLSAYCG . A . IC . ASAGV . AASLTYLY . G . . .  
UniRef100\_UPI0003ADDECF . . . . . IR . . Y RALI . VSNLSIYIK . . . . . H . . . . YIG . . . . PLSAFCG . A . VS . ASCGS . GAAITYMA . G . . .  
UniRef100\_UPI0003B30D5B . . . . . TL . . L RALV . VSNLTTIHIK . . . . . T . . . . GIG . . . . RLSAYCG . A . VC . AGVGA . GAGITWLH . G . . .  
UniRef100\_UPI0003B725E4 . . . . . EI . . Q KASL . LSCFITTSIVK . . . . . S . . . . KFG . . . . FVSSECG . VVHA . AGGVI . IGGIYLYL . K . GK . . .  
UniRef100\_UPI0003B779DB . . . . . QM . . LEAVA . LSHMITAYVK . . . . . A . . . . HTG . . . . RLSAYCG . CSAVA . AGAGA . AAGVAYLLG . GD . . .  
UniRef100\_UPI0003BE4938 . . . . . TL . . A RALA . LSHLTAISIH . . . . . S . . . . RYT . . . . RLSALCA . A . ST . AAMGA . AAGMAWLLFT . RN . . .  
UniRef100\_UPI0003E34F48 . . . . . KR . . I RALF . LSHLMAIYIH . . . . . S . . . . KLP . . . . KLSALCA . V . TT . AAMGS . CAGLAWLLT . GK . . .  
UniRef100\_UPI0003F591C1 . . . . . EL . . AEAIA . LSHLVTAIVK . . . . . A . . . . KTG . . . . RLTPVCG . CSA . AGAGA . AALTRLAG . GT . . .  
UniRef100\_UPI0003F5EEC4 . . . . . EL . . Y RALV . LSNLIAIYQK . . . . . Y . . . . RMG . . . . RLSAYCG . A . VS . AAAGA . GAGITYLM . G . . .  
UniRef100\_UPI0003F9F671 . . . . . KV . . Y RALA . LSNLIAIHQK . . . . . T . . . . GIG . . . . RLSAYCG . A . VS . AGAAA . GAGIAYLC . G . . .  
UniRef100\_UPI0003FA1CAC . . . . . EA . . L RAI . VSHIITAYVK . . . . . A . . . . HTG . . . . RLSAYCG . CSAVA . AGAGA . AAGVAYLMG . GD . . .  
UniRef100\_UPI0004009E6D . . . . . TL . . F RALL . VSCLVTIHIK . . . . . T . . . . GIG . . . . RLSAYCG . A . VS . AGVGA . GAGISWLH . G . . .  
UniRef100\_UPI000400D5C8 . . . . . LI . . Y KALT . LSAMVTCIVK . . . . . A . . . . RVG . . . . RLSALCG . SAIA . GGA . AAGVAYLLG . GT . . .  
UniRef100\_UPI0004010F26 . . . . . RL . . Y RALV . LSNLIAIHQK . . . . . T . . . . SIG . . . . KLSAFCG . A . VS . AACGA . GAAITYML . G . . .  
UniRef100\_UPI0004025437 . . . . . EL . . AEAALA . LSHLVTGAIK . . . . . A . . . . KTG . . . . RLTPVCG . CSAVA . AGAGA . AALTRLAG . GT . . .  
UniRef100\_UPI000403B2AE . . . . . KK . . Y RALA . LSNLTAIYK . . . . . T . . . . FIG . . . . RLSAYCG . A . VS . AGAGA . GAGIAYLC . G . . .  
UniRef100\_UPI0004048F81 . . . . . KL . . L RALA . ISHLCAIYK . . . . . S . . . . FQD . . . . KLSALCA . G . TT . AAMGS . AALCWLMLG . GS . . .  
UniRef100\_UPI000404C648 . . . . . KL . . A RALI . MSHLTSIHMK . . . . . H . . . . RLG . . . . RLSALCG . A . TV . AAAAA . CCGIVLLMG . GG . . .  
UniRef100\_UPI000407936F . . . . . QL . . AESLA . LSHLVCGFLK . . . . . A . . . . HTG . . . . RLTPVCG . CAVA . AGAGA . AAGLVRLQ . GT . . .  
UniRef100\_UPI0004091018 . . . . . KM . . Y RALV . ISNLIAAHLK . . . . . T . . . . GIG . . . . SLSAFCG . A . VS . AATGS . GAGITYLR . G . . .  
UniRef100\_UPI00040EDDBF . . . . . KM . . Y RALA . LSNLAAIYK . . . . . T . . . . FIG . . . . RLSAYCG . A . VN . AGAGA . GAGIAYIC . G . . .  
UniRef100\_UPI000413485D . . . . . KL . . M RAVA . MSDLVAVHVK . . . . . H . . . . YIG . . . . ELSAFCG . A . VS . AACGA . GAAITYLR . G . . .  
UniRef100\_UPI00041613C4 . . . . . DL . . A RALV . LSNLVTIRIK . . . . . K . . . . HMG . . . . RLSPLCG . AGIA . GATGA . SCGITYLLG . GD . . .  
UniRef100\_UPI0004169C4B . . . . . LM . . P RAVM . LSYLVTCISIK . . . . . I . . . . GVG . . . . RLSALCG . SGVA . GGAGV . AATAYLFG . GT . . .  
UniRef100\_UPI0004186BE4 . . . . . QL . . I RALI . LSHLSAIHMK . . . . . S . . . . HLG . . . . KLSALCG . A . SL . AATAS . CCGIVLLG . GG . . .  
UniRef100\_UPI00041CA3D4 . . . . . AM . . YQAVG . LSHVLTIVVK . . . . . S . . . . HTG . . . . RLAPIC . CSA . AGAGA . AAGITWMLG . GD . . .  
UniRef100\_UPI00041E72C1 . . . . . WR . . I KALA . LANLLALYIK . . . . . Q . . . . GIG . . . . RLSAYCA . V . VS . AASAG . AAGVAYLM . G . . .  
UniRef100\_UPI000420196F . . . . . QL . . Y RALL . LANLVTLEHK . . . . . E . . . . GIG . . . . RLSAYCG . A . VS . AGAGA . GAGIAYLC . G . . .  
UniRef100\_UPI0004201E14 . . . . . NR . . A RALM . LSHLMAYIYK . . . . . D . . . . KLP . . . . RLSALCA . V . TT . AAMGA . AAGMAYLLG . GE . . .  
UniRef100\_UPI000422EAB3 . . . . . EL . . I RALT . LSHLTAIYIK . . . . . Q . . . . SLG . . . . RLSALCG . C . VV . ASIGS . SCGITYLMG . GD . . .  
UniRef100\_UPI000423710D . . . . . QL . . A RALI . MSHLGAIIYK . . . . . S . . . . HYP . . . . PLSAFCG . N . TV . TSSAA . AMAMTYLSG . GS . . .  
UniRef100\_UPI0004267E44 . . . . . QM . . I RGLA . FSHLACIHIK . . . . . T . . . . NVG . . . . RLSAYCG . A . IC . ASAAV . SGALAFVM . E . . .  
UniRef100\_UPI000427327C . . . . . EL . . V RALM . LSHLTAIYIK . . . . . Q . . . . SLG . . . . TLSALCG . C . VV . ASIGS . SCGITYLMG . GN . . .  
UniRef100\_UPI0004279044 . . . . . KR . . V RALA . LSSMVAIYK . . . . . S . . . . FLF . . . . KLSAFCA . T . VT . AAMGA . AAGMAWLLA . DD . . .  
UniRef100\_UPI00044D3E81 . . . . . KL . . Y RALA . LANLVTIRIK . . . . . T . . . . GIG . . . . RLSAYCG . A . VS . AGCAA . ACGIAYLL . G . . .  
UniRef100\_UPI000462FF1A . . . . . EI . . AEGII . YSHLCTSFVK . . . . . S . . . . RMG . . . . RLSPVCG . CAVA . AGAGA . AGGIVHLLG . GS . . .  
UniRef100\_UPI0004639C5B . . . . . EI . . ARAIV . LSHLSTSFVK . . . . . S . . . . RMG . . . . RLSPIC . CSAVA . AGAGA . AAGIAYLLS . QD . . .  
UniRef100\_UPI0004640B14 . . . . . EL . . Y RALC . ISNLTIAQDQK . . . . . R . . . . YIG . . . . PLSAYCG . V . VC . AAAAS . GAAITYLY . G . . .  
UniRef100\_UPI00046473C4 . . . . . EI . . Y RALC . VSNLVAIYK . . . . . Q . . . . YIG . . . . SLSAYCG . A . VS . AAAAG . GAGITYLC . G . . .  
UniRef100\_UPI0004684C3B . . . . . KL . . I RALF . FSHLATTIHIK . . . . . T . . . . NVG . . . . RLSAYCG . V . IC . SAAAV . AGALFLN . D . . .  
UniRef100\_UPI000469850B . . . . . EL . . I RALV . LSHLTAIYIK . . . . . Q . . . . SLG . . . . KLSALCG . C . VV . ASTGS . SCGITYLMG . GN . . .  
UniRef100\_UPI00046A0861 . . . . . EL . . T RALI . LSHLTVIYIK . . . . . Q . . . . SLG . . . . RLSALCG . C . VV . AATGS . SCGITYLMG . GD . . .  
UniRef100\_UPI00046E54AA . . . . . EL . . V RALI . LSHLTAIYIK . . . . . Q . . . . SLG . . . . ALSALCG . C . VV . ASIGS . SCGITYLMG . GN . . .  
UniRef100\_UPI00046F39A8 . . . . . KL . . A RALI . MSHLTAIYK . . . . . S . . . . YYP . . . . PLSAFCG . N . SV . TSGAA . AMAMTYLAD . GT . . .  
UniRef100\_UPI00046F70C9 . . . . . KL . . A RALI . MSHLAAIYK . . . . . S . . . . YYP . . . . PLSAFCG . N . SV . TSSAA . AMAMTYLAD . GS . . .  
UniRef100\_UPI000470DF48 . . . . . QL . . Y RALL . ISNLTIAHMK . . . . . E . . . . GIG . . . . RLSAYCG . A . VS . AGTGA . GAGIAYLL . G . . .  
UniRef100\_UPI000470EDDB . . . . . KM . . L RAVA . LSDLLTIYQK . . . . . Q . . . . FIG . . . . RLSAYCG . A . VN . AGCAS . AAGIAYLE . G . . .

UniRef100\_UPI000472CED3 . . . . . E L . . V R A L I . . M S N L T A I Y I K . . . . . Q . . . . H L G . . . . T L S A L C G . . C . V V . A S T G S . S C G I T Y L M G . G T . .  
UniRef100\_UPI00047853AA . . . . . V L . . V R G L A . . F S H L V T L Y I K . . . . . N . . . . F T G . . . . R L S P V C G . . C A V A . A G T G A . A A G M T W M L G . G D D . .  
UniRef100\_UPI000478677B . . . . . A T . . N R A L A . . L S L L I V G V I K . . . . . S . . . . R T G . . . . I L T P H C G . . C A V A . A G T G A . A G G I A W L L G . G R A . .  
UniRef100\_UPI000478B76D . . . . . K L . . Y R A L I . . I S D L V T I H Q K . . . . . T . . . . G I G . . . . R L S A Y C G . . A . V C . A A G A S . G A G I A Y L Y . G . . . .  
UniRef100\_UPI000478B9A9F . . . . . K L . . Y R A L V . . L A N L V T L H E K . . . . . E . . . . G I G . . . . R L S A Y C G . . A . V S . A G A G A . G A G I A W L C . S . . . .  
UniRef100\_UPI00047894AD . . . . . T L . . I R A L A . . L S H L I T V Y I K . . . . . S . . . . Y T G . . . . K L S P L C G . . C A V A . A G I G A . S T G I A F L M G . G D . . . .  
UniRef100\_UPI00047CECD3 . . . . . E L . . I R A L A . . L S H L V A I S V H . . . . . A . . . . R Y T . . . . R L S A L C A . . A . S T . A A M G A . A A G M A W L F T . R D . . . .  
UniRef100\_UPI00047D518C . . . . . R L . . A K S L A . . I S H L V T A Y V K . . . . . N . . . . F T G . . . . R L S A V C G . . C G V A . A S T G A . T A G L S W L M S . G D I . . . .  
UniRef100\_UPI00047E2814 . . . . . R I . . E E A L A . . L A C L L T T A T T . . . . . H . . . . R L G . . . . T L S A V C G . . A S N A . A G I G I . A V G L V H L G G . G G . . . .  
UniRef100\_UPI00047F7DC2 . . . . . I I . . I R S V A . . L S H L V T Y I Y K . . . . . S . . . . Y T G . . . . A L S P V C G . . C G V A . A G V G A . S A G L T Y L L G . G N . . . .  
UniRef100\_UPI0004800CCA . . . . . Q L . . L R A T A . . L S Y L V C M Y I K . . . . . E . . . . Y S G . . . . K L S A F C G . . C A I A . A G T G M . A C G L A Y L K G . G T H . . . .  
UniRef100\_UPI000480F58B . . . . . K L . . A R A T M . . L S Y L I C T Y I K . . . . . E . . . . Y S G . . . . R L S A F C G . . C G I A . G G T G V . A C G I G Y L R M . A N E . . . .  
UniRef100\_UPI0004812F9D . . . . . K L . . A R A L A . . I S H L V T G F I K . . . . . N . . . . F T G . . . . R L S A V C G . . C G V A . A S T G A . T A G L S W L M D . S S Q . . . .  
UniRef100\_UPI000481BD86 . . . . . E L . . Y R A L L . . L S N L V T L H E K . . . . . E . . . . G I G . . . . R L S A Y C G . . A . V S . A G A G A . G A G I A W L C . T . . . .  
UniRef100\_UPI0004835BDC . . . . . A L . . L R A I G . . L S H L I T A Y I K . . . . . T . . . . Y T G . . . . R L S A V C S . . C S L A . A G A G S . A A G L A F A L G . G D . . . .  
UniRef100\_UPI000483D566 . . . . . E M . . I R A L V . . V S N L I A I H I K . . . . . T . . . . G I G . . . . S L S A Y C G . . A . T S . A A C G A . A A G I C H M K . G . . . .  
UniRef100\_UPI00048407FB . . . . . K L . . Y R A L V . . L S N L I A I L Q K . . . . . K . . . . H I G . . . . K L S A F C G . . V . V C . A A T G A . A S G I A Y L H . D . . . .  
UniRef100\_UPI00048572F0 . . . . . E L . . I R A L M . . L S H L T A I Y I K . . . . . Q . . . . S L G . . . . K L S A L C G . . C . V V . A S I G S . S V G I T Y L M G . G D . . . .  
UniRef100\_UPI000486D379 . . . . . S L . . Q K A L A . . F G L L L L V I I K . . . . . K . . . . Y T G . . . . L L T P M C G . . C A V A . V S A A A . A A A I T Y S L G . G K P . . . .  
UniRef100\_UPI000487A125 . . . . . D L . . A R A L A . . L S N L V T I H V K . . . . . S . . . . F I G . . . . R L S P L C G . . A G I A . A S I G S . C T A I T Y L L G . G E . . . .  
UniRef100\_UPI0004893023 . . . . . N L . . A R S L I . . L S N L I A I H I K . . . . . S . . . . Y L G . . . . R L S A L C G . . C . V V . A S A G A . S S G I T Y L L G . G D . . . .  
UniRef100\_UPI000489DAAC . . . . . K V . . L R A V F . . F A H L I N L Y V K . . . . . K . . . . H T G . . . . K L S A M C G . . C A I A . A G I A S . S V G I T W M L G . G N E . . . .  
UniRef100\_UPI00048C76FC . . . . . Q T . . V R A L M . . L S H L T A I Y I K . . . . . S . . . . Y Q N . . . . K L S A L C G . . A . T T . A A M G S . A A G I T Y L L D . G E . . . .  
UniRef100\_UPI00048D6FC1 . . . . . T V . . L E A I A . . L S H I V T A Y V K . . . . . A . . . . H T G . . . . R L S A I C G . . C S V A . A G S G A . T A G I T F L L G . G D . . . .  
UniRef100\_UPI0004880C16 . . . . . Q L . . V R A V A . . L S H L V T I H I K . . . . . S . . . . K F G . . . . R L S A L C G . . V . T V . S G T G A . S C G I T Y L L G . G G K . . . .  
UniRef100\_UPI000491433C . . . . . Q L . . L R A L I . . V A N L V A V H I K . . . . . T . . . . G I G . . . . W L S A F C G . . A . V S . A G T G A . A A G I A Y L H . G . . . .  
UniRef100\_UPI00049711BC . . . . . R L . . Y R A L I . . I S N L I A I H Q K . . . . . T . . . . G I G . . . . R L S A Y C G . . A . A S . A G C A A . G C G I A Y L L . G . . . .  
UniRef100\_UPI000497B560 . . . . . R L . . Y R A L L . . L S N L V T L H E K . . . . . E . . . . G I G . . . . R L S A Y C G . . A . I S . A G A G A . G A A I A W L C . G . . . .  
UniRef100\_UPI0004B019E5 . . . . . E L . . V R A L M . . L S H L T V I Y I K . . . . . Q . . . . S L G . . . . R L S A L C G . . C . V V . A A T G S . S C G I T W L M G . G G . . . .  
UniRef100\_UPI0004B06938 . . . . . E L . . I R A L V . . V S N L V T I H Q K . . . . . T . . . . G I G . . . . R L S A F C G . . V . V S . A G C G A . G A G I A F L H . G . . . .  
UniRef100\_UPI0004B0E061 . . . . . K L . . Y R A L I . . F A N L I G L Y N K . . . . . Q . . . . G I G . . . . K L S A Y C G . . V . V S . A G S S S . I S G I A M L K . G . . . .  
UniRef100\_UPI0004B27D60 . . . . . T M . . L R A L L . . I S N L I S V H I K . . . . . Y . . . . G I G . . . . A L S A F C G . . A . V S . A G C A A . G C G I A F L Y . G . . . .  
UniRef100\_UPI0004B2B5C4 . . . . . K L . . Y R A L I . . I S N L C T I H Q K . . . . . T . . . . G I G . . . . R L S A Y C G . . A . V S . A G V G A . G C G I A Y L K . G . . . .  
UniRef100\_UPI0004B2C343 . . . . . E L . . I R A L F . . L S H L C T V H I K . . . . . T . . . . Q V G . . . . R L S A Y C G . . A . M C . A A A G V . S G A L S F L M . G . . . .  
UniRef100\_UPI0004B65006 . . . . . E L . . I R A L I . . L S N L T A I Y I K . . . . . Q . . . . N L G . . . . A L S A L C G . . C . V V . A S T G S . S C G I T Y L M G . G T . . . .  
UniRef100\_UPI0004B82859 . . . . . K L . . Y R A L A . . L S N L L G I H Q K . . . . . S . . . . G I G . . . . K L S A Y C G . . A . V S . A G C A A . G A A I A Y L D . D . . . .  
UniRef100\_UPI0004BA18BC . . . . . K M . . Y A A L C . . V A N L V S I H Q K . . . . . K . . . . Y I G . . . . S L S A Y C G . . A . V S . A A A G A . A C G I A Y M N . G A . . . .  
UniRef100\_UPI0004D3CAB1 . . . . . R L . . A R A L M . . L S H L S A I Y I H . . . . . N . . . . Q L P . . . . R L S A L C A . . A . T T . A A M G A . A A G M A W L V D . G R . . . .  
UniRef100\_UPI0004E19D09 . . . . . T L . . L E A I A . . L S H L V T A Y V K . . . . . A . . . . Q T G . . . . R L S A V C G . . C S V A . A G A G A . T A G T I T Y L M G . G T . . . .  
UniRef100\_UPI0004F30DE . . . . . M L . . A R A L A . . L S N L V T V H I K . . . . . H . . . . Y I G . . . . R L S P L C G . . S G I A . G G V G A . S N G I T Y L M G . G S . . . .  
UniRef100\_UPI000509BABF . . . . . N L . . A R A L A . . I S N L I T I H I K . . . . . S . . . . Y L G . . . . R L S A L C G . . C G V A . A A I G S . S C A I T Y L L G . G D . . . .  
UniRef100\_UPI0005186669 . . . . . R L . . L R A L L . . L S N L V T L H E K . . . . . E . . . . G I G . . . . R L S A Y C G . . A . V S . A G A G A . G A G I A W L C . G . . . .  
UniRef100\_UPI000518E51E . . . . . Q L . . Y R A L V . . V S N L V T I H L K . . . . . T . . . . G I G . . . . S L S A Y C G . . A . T S . A G A G A . G A G I C Y L Y . G . . . .  
UniRef100\_UPI00051BF597 . . . . . K I . . L R A V V . . L S D L M T M Q Q K . . . . . S . . . . K I G . . . . R L S A Y C G . . V . I S . A G C S . G A G I A Y L Q . G . . . .  
UniRef100\_UPI00051C0711 . . . . . K L . . L R A L C . . I S N L T A O D Y K . . . . . R . . . . Y I G . . . . P L S A Y C G . . A . V C . A A A G A . G A G I T Y L C . G . . . .  
UniRef100\_UPI0005269EBB . . . . . T L . . I R A L I . . L S H M T A I Y I H . . . . . D . . . . K L P . . . . K L S A L C A . . V . T T . A A M G A . A A G M A W L L K . R N . . . .  
UniRef100\_UPI00052BD101 . . . . . I L . . A R S I A . . L S Y I I N I Y I K . . . . . E . . . . F S G . . . . K L S A F C G . . C A V S . A G T G V . S A G I C Y L L G . G R L . . . .  
UniRef100\_UPI00052C17F4 . . . . . Q M . . A R A I M . . L S S L M V I Y I K . . . . . Q . . . . S L G . . . . R L S A L C G . . C . V V . A A T G S . A C G I T Y L M G . G T . . . .  
UniRef100\_UPI00052D7434 . . . . . Q K . . Y R A L L . . L S N L M V I Y I K . . . . . Q . . . . K L G . . . . R L S A L C G . . C . V V . A A T G S . A A G I T Y L M G . G S . . . .  
UniRef100\_UPI00052DC3D2 . . . . . R T . . T R A L M . . M S G L L V V Y I K . . . . . Q . . . . L L G . . . . R L S C L C G . . M . V V . S G I G S . S A A I V Y L M G . G T . . . .  
UniRef100\_UPI00054D1D18 . . . . . K L . . Y R A L L . . I S N L I S I H I K . . . . . Y . . . . G I G . . . . A L S A F C G . . A . V S . A G C A A . G C G I A Y L H . G . . . .  
UniRef100\_UPI00054E526F . . . . . K L . . A K A L A . . I S H I I N S Y I K . . . . . Y . . . . Y I G . . . . R L S A L C G . . C G V A . A A T G A . S V A I S W L M G . A N E . . . .  
UniRef100\_UPI000551AC2E . . . . . Q T . . T K A V I . . L S C L I T S I I T . . . . . A . . . . K F G . . . . F V S S T C G . . T I H A . A G V G V . L G A V L Y L . Q . N R . . . .  
UniRef100\_UPI0005550901 . . . . . K L . . A R A L V . . L A N L V A I H I K . . . . . S . . . . Y L G . . . . R L S A L C G . . C . V V . A S S G A . S C G I T Y L M G . G N . . . .  
UniRef100\_UPI0005594DB9 . . . . . K L . . Y R A L L . . I S N L I T L H L K . . . . . T . . . . G I G . . . . R L S A Y C G . . A . V S . A G A G A . G S A I A W L H . G . . . .  
UniRef100\_UPI00055ABE32 . . . . . E L . . I R A L I . . L S H L T V V Y I K . . . . . Q . . . . K L G . . . . R L S A L C G . . C . V A . A A T G A . S C G I T H L M G . G D . . . .  
UniRef100\_UPI0005654CFA . . . . . Q L . . I R G L F . . F S H M T T I H I K . . . . . T . . . . N I G . . . . R L S A Y C G . . A . M C . A S A G V . A G A I S F L D . G . . . .  
UniRef100\_UPI000568CCCO . . . . . Q L . . I R G L A . . F A D L M A L L Q K . . . . . K . . . . Y I G . . . . D L S A Y C G . . A . T C . A G C A A . V S G I A Y I E . G . . . .  
UniRef100\_UPI00058D6E89 . . . . . Q R . . T R A I A . . M S H L A A L Y I K . . . . . A . . . . H L P . . . . V L S G L C A . . T . T T . A G M G A . A V G M S W L L D . G N . . . .  
UniRef100\_UPI00058EA537 . . . . . E L . . A R A L A . . I S S L V T I Y I K . . . . . S . . . . Y M G . . . . R L S P I C G . . A G I A . A S T G A . S A A M T Y L L G . G T . . . .  
UniRef100\_UPI00058F7465 . . . . . K L . . Y R T L A . . F S N L L T I Y I K . . . . . E . . . . F I G . . . . K L S A F C G . . A V S . A A C A S . G A A I T Y I D . G . . . .  
UniRef100\_UPI0005A6581E . . . . . Q L . . T R A L V . . M S H L I A I Y I K . . . . . T . . . . Y Q N . . . . K L S A L C A . . A . S T . A A M G A . G A A I T W L L G . G Q . . . .  
UniRef100\_UPI0005A7BDA1 . . . . . L L . . A R A I A . . L S N L V T V H V K . . . . . H . . . . Y I G . . . . R L S P L C G . . S G I A . G G V G A . S S G I T Y L M G . G S . . . .  
UniRef100\_UPI0005B25459 . . . . . R L . . L R G I F . . Y G H I I N K F V K . . . . . A . . . . Y V G . . . . R L S A F C G . . C A I S . A G V G A . N A G I T W M L G . G N D . . . .  
UniRef100\_UPI0005B26E11 . . . . . K I . . I R G V A . . I S C L I T I Y I R . . . . . Q . . . . W V G . . . . L L S P L C G . . V . V M . A A A G A . S A G I T Y I L G . G N V . . . .  
UniRef100\_UPI0005C560FF . . . . . E M . . Y R A L M . . V S H L S T V H I K . . . . . T . . . . N V G . . . . R L S A Y C G . . V . M T . A S A I V . S G A L V Y L D . G . . . .  
UniRef100\_UPI0005CD1BEA . . . . . Q L . . A R A L I . . M S H L G A I Y I K . . . . . S . . . . H Y P . . . . P L S A F C G . . N . T V . T S A A A . A M A M V Y L A G . G S . . . .  
UniRef100\_UPI0005D177AC . . . . . K L . . F R S L V . . V S N L I A I H Q K . . . . . Y . . . . Y I G . . . . S L S A Y C G . . A . V S . A A C G A . G A G I T Y M Y . G . . . .  
UniRef100\_UPI0005D21129 . . . . . K R . . M R A L I . . I S N L V S I Y I K . . . . . H . . . . Y I G . . . . A L S A F C G . . A . V S . A A C G A . G A A I T Y M S . G . . . .  
UniRef100\_UPI0005D301C2 . . . . . Q L . . A R A L I . . M S H L G A I Y M K . . . . . S . . . . F Y P . . . . P L S P F C G . . N . A V . T S S A A . A M G M V Y L A G . G S . . . .  
UniRef100\_UPI0005D4011A . . . . . Q L . . I R A L M . . L S H L M A I Y I K . . . . . S . . . . H Q N . . . . K L S A L C G . . A . T T . A A M G A . V A G M T W L L G . G D . . . .  
UniRef100\_UPI0005DDAE7D . . . . . K L . . A R S L A . . I S H L L T A Y V K . . . . . N . . . . Y T G . . . . R L S A V C G . . C G V A . A S I G A . T A G L A W L M G . C T E . . . .  
UniRef100\_UPI0005DF79E5 . . . . . T M . . T R A L I . . M S H L A A Y M K . . . . . S . . . . F Y P . . . . P L S P F C G . . C . A V . T S S A A . A M A M T Y L A G . G T . . . .  
UniRef100\_UPI0005E1A8D7 . . . . . T L . . A R A L A . . L A H L A A I S I H . . . . . M . . . . R Y T . . . . R L S A L C A . . A . S T . A A M G A . A A G M S W L L T . K N . . . .  
UniRef100\_UPI0005EDBE13 . . . . . Q L . . A R A L I . . M S H L G A I Y I K . . . . . S . . . . Y Y P . . . . P L S A F C G . . N . T V . T S A A A . S M A L V Y L A G . G S . . . .  
UniRef100\_UPI0005EECA29 . . . . . K M . . I R A V A . . L S H L I T I H I K . . . . . S . . . . K F G . . . . R L S A L C G . . V . T A . A G M G A . S G A I V Y L L D . G H L . . . .  
UniRef100\_UPI0005F18896 . . . . . R L . . A R A L M . . L S H L S A I Y I H . . . . . Y . . . . Q L P . . . . R L S A L C A . . A . T T . A G M G A . A A G M A W L M G . G S . . . .  
UniRef100\_UPI00061465DC . . . . . R L . . A R A L M . . L S H L S A I Y I K . . . . . N . . . . Q L P . . . . R L S A L C A . . A . T T . A A M G A . A A G M A W L V D . G R . . . .  
UniRef100\_UPI00061540F1 . . . . . T L . . T R A L T . . L S H L V A I S V H . . . . . A . . . . R Y T . . . . R L S A L C A . . A . S T . A A M G A . A A G M A W L F S . R D . . . .  
UniRef100\_UPI00061CEC06 . . . . . T L . . L R A L V . . L S H L M A I Y V H . . . . . S . . . . H F P . . . . P L S A L C A . . A . T T . A S M G A . A A G M A W L L T . K D . . . .  
UniRef100\_UPI00061D174B . . . . . Q L . . T R A L M . . L S H L T A I Y I H . . . . . S . . . . Q L P . . . . T L S A L C A . . A . T T . A S M G A . A A G I A W L I E . G R . . . .  
UniRef100\_UPI000645EB4A . . . . . E L . . A R A L V . . I S N L L S I Y I K . . . . . S . . . . K M G . . . . R L S A L C G . . V . A V . A A T A S . S C G I V F L L G . G T . . . .  
UniRef100\_UPI00064ED1A5 . . . . . Q L . . A R A L A . . L S H L V A I Y I K . . . . . C . . . . K L P . . . . R L S A L C A . . T . T T . A G M G A . A A G I I W L M D . G S . . . .  
UniRef100\_UPI00064F42C5 . . . . . T L . . I R G V V . . L S N L I T I Y I K . . . . . S . . . . I L G . . . . R L S L C G . . A . T T . S A T G A . C C G I T Y M M G . G G E . . . .  
UniRef100\_UPI000650874E . . . . . E L . . A R A L M . . L S H L T A I Y I K . . . . . H . . . . Q L P . . . . R L S A L C A . . A . T T . A A M G A . A A G M A W L F D . G R . . . .  
UniRef100\_UPI000657FCDF . . . . . E L . . A R A L I . . L S H L M A I Y I H . . . . . S . . . . Q L P . . . . T L S A L C A . . A . T T . A A M G A . A A G M A W L L E . P R . . . .  
UniRef100\_UPI00065DC13D . . . . . Q L . . Y R A L T . . L S N L V A I H Q K . . . . . T . . . . G I G . . . . R L S A Y C G . . A . V C . A G A A A . G A G I A Y L Y . G . . . .  
UniRef100\_UPI000664A9FE . . . . . R L . . A K A L A . . I S H L I T G Y I K . . . . . N . . . . Y T G . . . . R L S A V C G . . C G V A . A S T G S . A A G I S W L M D . G D M . . . .  
UniRef100\_UPI0006666BAE . . . . . E L . . A R A M A . . L S H L V A I S I H . . . . . A . . . . R Y T . . . . R L S A L C A . . A . S T . A A M G A . A A G M A W L F T . R D . . . .  
UniRef100\_UPI0006675CDC . . . . . R L . . A R A L M . . L S H L S A I Y I H . . . . . H . . . . Q L P . . . . R L S A L C A . . A . T T . A A M G A . A A G M A W L M D . G R . . . .  
UniRef100\_UPI00067E8717 . . . . . K L . . Q R A V F . . F G H A V N N E V K . . . . . K . . . . Y T G . . . . K L S A I C G . . C A I A . A G I G A . T A G I T W L L G . G T . . . .  
UniRef100\_UPI00067E87A0 . . . . . K L . . Y R A I A . . L S Y L I N I Y I K . . . . . E . . . . F S G . . . . K L S A F C G . . C A V A . A G T G V . S A A I T Y L L G . G N C . . . .  
UniRef100\_UPI00067F25CD . . . . . K M . . I R A V A . . I S H L I A I F I K . . . . . N . . . . Q F G . . . . R L S A L C G . . V . T I . A G A S S . A A A I T Y L L G . G N T . . . .  
UniRef100\_UPI000682F91F . . . . . Q L . . I R A L M . . L S H L T V V Y I K . . . . . Q . . . . K L G . . . . R L S A L C G . . C . V A . A A T G A . S C G I T Y L M G . G N . . . .  
UniRef100\_UPI00068BDE31 . . . . . R I . . L R A L C . . V S N L I T I H Q K . . . . . T . . . . G I G . . . . K L S A F C G . . V . V S . A A A G A . V C G I A Y L N . G . . . .  
UniRef100\_UPI00068C5F2D . . . . . K M . . A R G L I . . L S H M T A I Y I H . . . . . H . . . . Q L P . . . . M L S A L C A . . A . T T . A S M G A . A A G I C W L L D . G S . . . .  
UniRef100\_UPI00068R3505 . . . . . Q L . . Y R A L V . . L S N L I A I H L K . . . . . S . . . . G I G . . . . K L S A Y C G . . V . V S . A A C G S . G A A I S Y L C . N . . . .  
UniRef100\_UPI0006B45A2F . . . . . D L . . T K A L A . . I S H M I N S I Y K . . . . . F . . . . Y I G . . . . R L S A L C G . . C G V A . A A T G A . S V A I V W L M G . G N K . . . .  
UniRef100\_UPI0006B4E53B . . . . . K L . . Y R A L A . . V S N L I S I H Q K . . . . . R . . . . Y I G . . . . S L S A Y C G . . A . T S . A A C G A . V S G I A Y M L . G . . . .  
UniRef100\_UPI0006B6582F . . . . . R L . . I R A V F . . F A H V I N R Y V K . . . . . M . . . . Y T G . . . . K L S A M C G . . C A I A . A G I G A . S A G I S W L L G . G N D . . . .  
UniRef100\_UPI0006B2A2F67 . . . . . R R . . V R A L A . . L S H A V A L Y A H . . . . . A . . . . G L P . . . . V L S A F C A . . A . T T . A A M G A . A A G I C W L V D . G S . . . .  
UniRef100\_UPI0006BA33881 . . . . . Q L . . A R A L I . . L S H L A A I Y I H . . . . . S . . . . K Y P . . . . R L S A L C A . . A . N T . A A M G A . A A G I A W L I D . G R . . . .  
UniRef100\_UPI0006BB9381 . . . . . N L . . A K A L F . . F A H V L N K Y V K . . . . . E . . . . Y S G . . . . K L S G I C G . . C A I G . A G V G A . A A G I V Y M L G . G D E . . . .

UniRef100\_UPI0006C39D8F . . . . . Q L . L R A T A . L S Y L V C M Y I K . . . . . E . . . . . Y S G . . . . . R L S A F C G . . . . . C A I A . A G S G M . A C A L V Y I L R G . G T V .  
UniRef100\_UPI0006C7D148 . . . . . K L . L R A E L . L G M L I I M Y M K . . . . . K . . . . . H V G . . . . . R L S P I C G . . . . . A T L . A G S G S . A A A I T Y M M G . G N L .  
UniRef100\_UPI0006C80B77 . . . . . E R . V R A L A . L A S M V A I Y A H . . . . . S . . . . . Y L P . . . . . K L S A F C A . . . . . T V T . A A M G A . A A G M A W L L D . R K .  
UniRef100\_UPI0006CF8A7E . . . . . Q V . L E A I A . L S H I I T A Y V K . . . . . A . . . . . Y T G . . . . . R L S A V C G . . . . . C S V A . A G S G A . T A G V T H L L G . G D .  
UniRef100\_UPI0006D2C4D0 . . . . . Q L . A R A L M . L S H L T A V Y I H . . . . . S . . . . . K L P . . . . . T L S A L C A . . . . . A S T . A S M G A . A A G M A W L L G . G D .  
UniRef100\_UPI0006D7A562 . . . . . R L . Y R G L M . V S N L I A I Y Q K . . . . . Y . . . . . Y I G . . . . . K L S A F C G . . . . . A V S . A G S A A . A A G I Y L I . G . . .  
UniRef100\_UPI0006E4604E . . . . . E L . A R A L V . I S N L V T I H L K . . . . . S . . . . . Y L G . . . . . R L S P L C G . . . . . A G I A . A S T G S . C C A M T Y I L G . G E .  
UniRef100\_UPI00071F4811 . . . . . R L . A R A L M . L S H L S A I Y I H . . . . . A . . . . . Q L P . . . . . R L S A L C A . . . . . A T T . A S M G A . A A G M S W L V D . G R .  
UniRef100\_UPI0007377E98 . . . . . K L . A R A L M . L S H L T A I Y I H . . . . . N . . . . . Q F P . . . . . R L S A L C A . . . . . A T T . A A M G A . A A G M A W L L D . G N .  
UniRef100\_UPI00073D997D . . . . . T L . A R A L A . L S H L V A I S I H . . . . . A . . . . . R Y T . . . . . R L S A L C A . . . . . A S T . A A M G A . A A G M A W L F S . R D .  
UniRef100\_UPI00073ED31D . . . . . Q L . V R A L A . M S N L I A A H I H . . . . . S . . . . . Y M G . . . . . H L S A L C G . . . . . I L I . A G T G A . A S A I T Y L M G . G S .  
UniRef100\_UPI00073F8157 . . . . . R T . A Q A V A . F A H L V N R Y I N . . . . . L . . . . . Q V G . . . . . K L A A V C T . . . . . C V A A S T A A . A A A M A W L F G . A D .  
UniRef100\_UPI0007453BC8 . . . . . E L . V R A V T . L S H L V A I S I H . . . . . S . . . . . R Y A . . . . . R L S A L C A . . . . . A S T . A A M G A . A A G M A W L L S . K D .  
UniRef100\_UPI000754CA4E . . . . . D L . A R A L T . L S H L V A I S I H . . . . . A . . . . . R Y T . . . . . R L S A L C A . . . . . A S T . A A M G A . A A G M S W L F T . R D .  
UniRef100\_UPI0007612A08 . . . . . E L . A R A L I . I A H C I P I H I K . . . . . K . . . . . R I G . . . . . P L S A L C G . . . . . I L P . A S I G A . G A G V A Y L Q N . G D .  
UniRef100\_UPI00076754E8 . . . . . R L . S R A L A . I S H L V T A Y I K . . . . . N . . . . . F T G . . . . . R L S A M C G . . . . . C G V A . A S T G A . T A G I A W L M D . E S I .  
UniRef100\_UPI00077B6F9A . . . . . K L . A R A L M . L S H L T A I Y I H . . . . . Y . . . . . Q L P . . . . . R L S A L C A . . . . . A T T . A A M G A . A A G M A W L L D . G R .  
UniRef100\_UPI00077B762A . . . . . T L . A R A L A . L S H L T A I S I H . . . . . S . . . . . R Y T . . . . . R L S A L C A . . . . . A S T . A A M G A . A A G M A W L F T . R N .  
UniRef100\_UPI0007CC6FEC . . . . . T L . A R A L A . L S H L T A I S I H . . . . . S . . . . . R Y T . . . . . R L S A L C A . . . . . A S T . A A M G A . A A G M A W L F T . R N .  
UniRef100\_UPI0007E2FD4B . . . . . R L . A R A L I . L S H L T A I Y I H . . . . . H . . . . . Q L P . . . . . T L S A L C A . . . . . A T T . A A M G A . A A G I A W L L D . G S .  
UniRef100\_UPI0007EA912E . . . . . T L . A R A L M . M S H L M A I Y I K . . . . . S . . . . . Y Q N . . . . . K L S A L C G . . . . . A T T . A S M G A . V A A M T W L L G . Q Q .  
UniRef100\_UPI0007ECF164 . . . . . Q T . I R A L A . L S H L T V I Y I K . . . . . Q . . . . . S L G . . . . . R L S A L C G . . . . . C V V . A A T G S . S C G I T Y L M G . G G .  
UniRef100\_UPI0008032F95 . . . . . K R . I R A L F . L S H L M A I Y I H . . . . . S . . . . . K L P . . . . . K L S A L C A . . . . . V T T . A S M G S . C A G I A Y L L T . G K .  
UniRef100\_UPI00080D994A . . . . . Q L . A R A L I . L S H T I A I Y I H . . . . . S . . . . . K F P . . . . . P L S A L C A . . . . . A S T . A A M G S . A A G M A W L L G K G . Q Q .  
UniRef100\_UPI00080DB02B . . . . . Q L . A R A L I . L S H T I A I Y I H . . . . . S . . . . . K F P . . . . . P L S A L C A . . . . . A S T . A A M G S . A A G M A W L L G K G . Q Q .  
UniRef100\_UPI00080DB567 . . . . . Q L . A R A L I . L S H T I A I Y I H . . . . . S . . . . . K F P . . . . . P L S A L C A . . . . . A S T . A A M G S . A A G M A W L L G K G . Q Q .  
UniRef100\_UPI0008240A25 . . . . . K L . A R A L I . L S H L I A I Y I K . . . . . T . . . . . H L D . . . . . T L S A M C G . . . . . A T T . A G T G A . S C G I T W L L G . G E .  
UniRef100\_UPI000826D560 . . . . . K M . I R A V A . L S H L I T I H I K . . . . . S . . . . . R F G . . . . . R L S A L C G . . . . . V T A . A G M G A . S G A I V Y L L D . G G L .  
UniRef100\_UPI0008298F8F . . . . . K L . L R A T A . L S Y L I T M Y I K . . . . . E . . . . . Y S G . . . . . K L S A F C G . . . . . C G I A . A G T G M . A C G L A F M R D . A S E .  
UniRef100\_UPI00082B4A3B . . . . . K L . Y R A L A . L S N L V A I H Q K . . . . . T . . . . . G I G . . . . . R L S A Y C G . . . . . A V C . A G A A A . G T G I A Y L C . G . . .  
UniRef100\_UPI00082B5CEF . . . . . K M . I R A V A . L S H L I T I H I K . . . . . S . . . . . K F G . . . . . R L S A L C G . . . . . V T A . A G M G A . S S A I V Y L L D . G N L .  
UniRef100\_UPI00082CB2ED . . . . . L R . L R A L A . L A N L I A I H Q K . . . . . K . . . . . Y I G . . . . . N L S A F C G . . . . . A V S . A A A G A . A G C I A Y M I . L K L Y .  
UniRef100\_UPI00082DCA09 . . . . . K L . Y R A L T . L S N L V A I H Q K . . . . . T . . . . . G I G . . . . . R L S A Y C G . . . . . A V C . A G A A A . V A G I A Y L C . G . . .  
UniRef100\_UPI00082E56C3 . . . . . T L . L R A L T . L S N L T A I H Q K . . . . . T . . . . . A I G . . . . . R L S A Y C G . . . . . A V S . A G A G A . G A G I A Y L H . G . . .  
UniRef100\_UPI00082E5D45 . . . . . E L . I R A L A . L A N L I A I H Q K . . . . . S . . . . . Y L G . . . . . R L S A L C G . . . . . C V V . A S A G A . S C G I T Y L M G . G K .  
UniRef100\_UPI00082EC760 . . . . . Q M . L R A I T . L S Y L L A I A I I . . . . . H . . . . . R I G . . . . . K S P S M C S . C E V A . A A L G I . A A G T V L L K G . G S I .  
UniRef100\_UPI00082F9F22 . . . . . E L . V R A S A . F S Y L T A I S V I . . . . . S . . . . . R L G . . . . . K S P A M C S . C E V A . A S L G V . A A G S V F L O G . G S L .  
UniRef100\_UPI0008328999 . . . . . E M . Y R A L V . V S N L I A V H I K . . . . . N . . . . . G I G . . . . . S L S A F C G . . . . . A V S . A G C A A . A G C I A Y L M . G . . .  
UniRef100\_UPI0008338905 . . . . . K L . Y R A L A . L S N L L T I H L K . . . . . S . . . . . E I G . . . . . R L S A Y C G . . . . . A V S . A G C G S . G A A I A Y L Y . G . . .  
UniRef100\_UPI000833FEB4 . . . . . K L . Y R A L L . F A N L L A A Y Q K . . . . . S . . . . . Y I G . . . . . R L S A Y C G . . . . . A V S . A A A A S . V A G V A F L D . D . . .  
UniRef100\_UPI000834FB49 . . . . . R L . L R A L A . L S D L V A A H V K . . . . . G . . . . . Y I G . . . . . A L S A F C G . . . . . V C V . A A C G A . G A A I C W M R . G . . .  
UniRef100\_UPI00083587B3 . . . . . Q L . T R A L I . M S H L T A I H I K . . . . . S . . . . . H M S . . . . . V L S A L C A . . . . . A T T . A A A G A . S A A I T W L L G . G T .  
UniRef100\_UPI00083945F5 . . . . . T L . L R G L L . F S N L L G L Y Q K . . . . . K . . . . . N I G . . . . . K L S A F C G . . . . . V V S . A A S A A . I C G I A F M K . G . . .  
UniRef100\_UPI00083962C7 . . . . . E T . L R A L V . L A N L M A I Y I K . . . . . S . . . . . H Q H . . . . . K L S A L C G . . . . . A T T . A S M G A . A A G M T Y I L L G . G N .  
UniRef100\_UPI00084875F1 . . . . . M L . Y R A L V . V S N L I S V H Q K . . . . . R . . . . . Y I G . . . . . N L S A Y C G . . . . . A V S . A G T A A . V C G I A Y L D . G . . .  
UniRef100\_UPI00084B5F72 . . . . . Q L . A R A L I . M S H L G A I Y I K . . . . . T . . . . . H Y P . . . . . P L S A F C G . . . . . N T V . T S A A A . A M A M V Y L A G . G S .  
UniRef100\_UPI00084636DAB . . . . . K T . Y R A L A . L S N L V A I H Q K . . . . . T . . . . . G I G . . . . . R L S A Y C G . . . . . A V S . A G A A A . G A G I A Y L C . G . . .  
UniRef100\_UPI0008637372 . . . . . M L . L R A A A . L S Y L I T M Y I K . . . . . E . . . . . Y S G . . . . . K L S A F C G . . . . . C G I A . A G T G M . A C G L A F M K G . G D E .  
UniRef100\_UPI00088B7A46 . . . . . Q L . Y R A L V . L A N L V T I H I K . . . . . T . . . . . G I G . . . . . A L S A Y C G . . . . . A T S . A G A G A . G A G I C F L Y . G . . .  
UniRef100\_UPI0008A543AE . . . . . D M . I R A I Y . F G H A I N R F V K . . . . . T . . . . . F S G . . . . . K L S G M C G . . . . . C A I A . A G L G A . A A G I T M M M G . G T D .  
UniRef100\_UPI0008D96B94 . . . . . K L . Y R A L V . L S N L I A I H E K . . . . . T . . . . . G I G . . . . . R L S A Y C G . . . . . A V S . A G C A A . G C G I A Y L Y . G . . .  
UniRef100\_UPI0008DA2597 . . . . . E L . I R A L M . M S H L T V I Y I K . . . . . Q . . . . . S L G . . . . . R L S A L C G . . . . . C V V . A A T G S . S C G I T W L M G . G D .  
UniRef100\_UPI0008DB02E6 . . . . . T L . Y R S L I . F A N L I G L Y I K . . . . . E . . . . . G I G . . . . . E L S A Y C G . . . . . V V S . A A S A S . I C G I A F L N . G . . .  
UniRef100\_UPI0008EB9056 . . . . . K R . L R A L A . L S S M V A I Y A H . . . . . G . . . . . Y L P . . . . . K L S A F C A . . . . . T V T . A S M G A . A A G M A W L L A . D N .  
UniRef100\_UPI0008FF7EAD3 . . . . . T M . V R A V T . F S D L L T I H L K . . . . . T . . . . . G I G . . . . . R L S A Y C G . . . . . V A S . A G S A A . G A A I C W L O . G . . .  
UniRef100\_UPI0008FF7ED94 . . . . . K L . F R A L A . V S N L V A L H Q K . . . . . T . . . . . Q I G . . . . . S L S A Y C G . . . . . A V C . A A V G S . G A A I T Y L H . G . . .  
UniRef100\_UPI0008F80DE9 . . . . . Q L . L R A T A . L S Y L V C M Y I K . . . . . E . . . . . Y S G . . . . . K L S A F C G . . . . . C A I A . A G T G M . A A V A L C W L R G . G D L .  
UniRef100\_UPI0008F82D52 . . . . . D L . Q R A L V . I S S L L A T A V I . . . . . H . . . . . R I G . . . . . K A P T M C S . C E V A . A T M G V . A V G A V L L O G . G T E .  
UniRef100\_UPI0008F8782C . . . . . L L . L R A T A . L S Y L V T M Y I K . . . . . E . . . . . Y S G . . . . . R L S A F C G . . . . . C A I A . A G T G M . A C G L V F L Q N . G S V .  
UniRef100\_UPI0008F937B4 . . . . . T L . Y R S L V . V S N L I T I H L K . . . . . S . . . . . G I G . . . . . R L S A Y C G . . . . . A V S . A G C G A . G C G I A Y L N . G . . .  
UniRef100\_UPI0008FY9589F . . . . . L L . Y R A L V . L S N L T A I Y I H . . . . . S . . . . . G I G . . . . . K L S A F C G . . . . . A V G . A G C A A . G A A I T W L R . G . . .  
UniRef100\_UPI0008FC57CC . . . . . Q L . I R G L I . F S H L S T I H L K . . . . . T . . . . . N V G . . . . . R L S A F C G . . . . . V M C . A A S A V . S G A I S F L E . D . . .  
UniRef100\_UPI0008FDD765 . . . . . Q L . A R A L M . L S H L M A I Y I H . . . . . S . . . . . Q L P . . . . . A L S A L C A . . . . . A T T . A S M G A . A A G M A W L L E . P G .  
UniRef100\_UPI0008FE8B8B . . . . . R R . Y R A L L . F A N L L A A Y Q K . . . . . S . . . . . Y I G . . . . . R L S S Y C G . . . . . A V S . A A A A S . V A G V A F L D . G . . .  
UniRef100\_UPI00091D9C84 . . . . . Q L . A R A L V . L S H L G A I Y I K . . . . . Q . . . . . H Y P . . . . . A L S A F C G . . . . . N T V . T S A S A . A M A M V Y L A G . G S .  
UniRef100\_UPI00092FE5DD . . . . . E L . I R A L V . L S H L T V I Y I K . . . . . Q . . . . . S L G . . . . . R L S A L C G . . . . . C V V . A A T G S . S C G I T Y L M G . G N .  
UniRef100\_UPI00093024B0 . . . . . E L . L R A L V . V S N L V T I H L K . . . . . T . . . . . G I G . . . . . R L S A Y C G . . . . . A T S . A G A G A . A A G I T Y L H . G . . .  
UniRef100\_UPI000930B414 . . . . . Q L . Y R A L A . L S N L T A I H Q K . . . . . T . . . . . P I G . . . . . R L S A Y C G . . . . . A V N . A G A A A . G A G I A Y L S . G . . .  
UniRef100\_UPI00093231F9 . . . . . E L . I R G L I . F S H L T T I H L K . . . . . T . . . . . N V G . . . . . R L S A F C G . . . . . V M C . A A S A V . S G A I S F L E . N . . .  
UniRef100\_UPI000934464B . . . . . E L . I R A L M . L S H L T V I Y I K . . . . . E . . . . . S L G . . . . . R L S A L C G . . . . . C V V . A A T G S . S C G I T W L M G . G T .  
UniRef100\_UPI0009388263 . . . . . E L . I R G L F . V S H L T T I H V K . . . . . T . . . . . N V G . . . . . R L S A Y C G . . . . . A T C . A A A G V . A A S L T Y L H . G . . .  
UniRef100\_UPI00093C1390 . . . . . K L . Y R A L L . L S N L V T I H Q K . . . . . T . . . . . G I G . . . . . R L S A Y C G . . . . . A V S . A G A G A . G A G I A Y L E . G . . .  
UniRef100\_UPI000943C72E . . . . . Q L . I R A L T . L S H L I A I Y I H . . . . . S . . . . . F L P . . . . . R L S A L C A . . . . . A G T . A A I G A . A A G M V W L L G . G T .  
UniRef100\_UPI00094B0001 . . . . . D L . A R A L V . L S D L V L V I H K . . . . . E . . . . . Y M G . . . . . R L S P L C G . . . . . S G I A . G G T G S . C C G I T Y L Q G . G G .  
UniRef100\_UPI00094E2923 . . . . . Q L . L R A T A . L S Y L V C M Y I K . . . . . E . . . . . Y S G . . . . . K L S A F C G . . . . . C A I A . A G T G A . A C A L V F L K G . G D A .  
UniRef100\_UPI00094E735C . . . . . Q H . I R A L A . L A H I T S M Y I H . . . . . S . . . . . F Y P . . . . . K L S G L C A . . . . . T A T . A A M G A . A T G M T Y L F G . G G .  
UniRef100\_UPI00094EF040 . . . . . K I . Y R A L C . V S N L I S I H Q K . . . . . R . . . . . F I G . . . . . S L S A Y C G . . . . . A T S . A G C G S . G A G I A Y M M . G . . .  
UniRef100\_UPI0009501AF9 . . . . . K L . M R A L V . L A N L V T I H Q K . . . . . T . . . . . G I G . . . . . R L S A Y C G . . . . . A S T . A G I G A . G A G I A Y L L . S . . .  
UniRef100\_UPI00096A533E . . . . . K L . Y R S L I . V S N L I T I H L K . . . . . D . . . . . G I G . . . . . K L S A Y C G . . . . . V V S . A G C G A . A C G I C Y Q D . G . . .  
UniRef100\_UPI0009711B93 . . . . . Q L . A R A L I . M S H L G A I Y I K . . . . . S . . . . . Y I P . . . . . P L S A F C G . . . . . N T V . T S A A A . A M A M V Y L A G . G T .  
UniRef100\_UPI0009774A03 . . . . . Q L . L R A T A . L S Y L V C M Y I K . . . . . E . . . . . Y S G . . . . . K L S A F C G . . . . . C A I A . A G S G M . A C A L V W L R G . G S V .  
UniRef100\_UPI00097D24C5 . . . . . K L . A R G L M . M S H L T S I H I K . . . . . H . . . . . H L G . . . . . R L S A H C G . . . . . A M V . A G T A S . A C G I A L L L G . G G .  
UniRef100\_UPI00097D6AB . . . . . T L . L R G L L . F S N L L G L Y Q K . . . . . K . . . . . N S G . . . . . K L S A F C G . . . . . A V S . A S S A A . A C G I A F M K . G . . .  
UniRef100\_UPI000981B105 . . . . . E L . V R G L I . M S H L T A I Y I K . . . . . Q . . . . . N L G . . . . . T L S A L C G . . . . . C I V . A S T G S . S C G I T Y L M G . G S .  
UniRef100\_UPI000984CB9F . . . . . R L . M R A V F . F A H V I N K Y V K . . . . . I . . . . . Y T G . . . . . K L S S M C G . . . . . C A I A . A G I G A . S A G I T W L L G . G N D .  
UniRef100\_UPI000987896C . . . . . E L . V R A V V . L S D L T A V H V K . . . . . Y . . . . . F I G . . . . . E L S A F C G . . . . . A V S . A S C G A . G A G I C Y L R . G . . .  
UniRef100\_UPI0009885148 . . . . . M L . L R A T A . L S Y L V C M Y I K . . . . . E . . . . . Y S G . . . . . K L S A F C G . . . . . C A I A . A G T G M . A C G L T M M R G . G D A .  
UniRef100\_UPI000988E457 . . . . . K L . Y R A L A . L S N L T A I H Q K . . . . . T . . . . . P I G . . . . . R L S A Y C G . . . . . A V N . A G A G A . G A G I A Y L C . G . . .  
UniRef100\_UPI00098CF8A1B . . . . . K L . Y R A L I . I S D L V T I H Q K . . . . . T . . . . . G I G . . . . . R L S A Y C G . . . . . A T S . A G A G S . G A G I A Y L N . G . . .  
UniRef100\_UPI00098D3B67 . . . . . E R . I R A Q T . L S H L V A I Y I H . . . . . N . . . . . T F P . . . . . A L S A L C A . . . . . T S T . A A M G A . A A G M G W L L G D K K .  
UniRef100\_UPI00098D3B67 . . . . . D R . I R A Q A . L S H L V A I Y I H . . . . . N . . . . . T F P . . . . . A L S A L C A . . . . . T S T . A A M G A . A A G M G W L L G D K K .  
UniRef100\_UPI00099058AA . . . . . R L . I R A L F . L S H L M A I Y I H . . . . . S . . . . . K L P . . . . . K L S A L C A . . . . . A T T . A A M G S . C A G I A W L L S . Q Q .  
UniRef100\_UPI000994A50E . . . . . L L . I R A V A . L S H L V T I H I K . . . . . S . . . . . K F G . . . . . R L S A L C G . . . . . V T V . A G M G A . S A A I T Y L L G . G E L .  
UniRef100\_UPI0009B08107 . . . . . R L . R A L V A . L S N L V A I H Q K . . . . . T . . . . . G I G . . . . . R L S A F C G . . . . . A V C . A G A A A . G A G I A Y L D . G . . .  
UniRef100\_UPI0009B9C8CB . . . . . K L . L R A T A . L S Y L V T M Y I K . . . . . E . . . . . Y S G . . . . . R L S A F C G . . . . . C A I A . A G T G M . A C A L V Y L K D . G T L .  
UniRef100\_UPI0009BA4056 . . . . . K L . Y R A L C . L S N L T A I H Q K . . . . . A . . . . . K I G . . . . . K L S A Y C G . . . . . A V S . A A T G A . G A G I C Y L C . G . . .  
UniRef100\_UPI0009BB382E . . . . . E L . I R A L M . M S H L T V I Y I K . . . . . Q . . . . . S L G . . . . . R L S A L C G . . . . . C V V . A A T G S . S C G I T W L M G . G S .  
UniRef100\_UPI0009BBCF51 . . . . . V M . Y R A L V . V S N L V A L L Q K . . . . . R . . . . . G I G . . . . . R L S A F C G . . . . . A V C . A G C A G . G A G I T Y L H . G . . .  
UniRef100\_UPI0009BBFC5B . . . . . K L . A T L A . F S H L T T A Y I K . . . . . I . . . . . F T G . . . . . G L S P V C G . . . . . C A V A . A G I G A . S A A V T W A L G . G T N .  
UniRef100\_UPI0009COCF43 . . . . . K L . I R A L T . L S H L T A I Y I H . . . . . A . . . . . F L P . . . . . V L S A Y C A . . . . . T D S . A A M G A . A A A L I Y I D S . A D .  
UniRef100\_UPI0009D940DD . . . . . V L . N R A L L . L S N L L A I Y Q K . . . . . Q . . . . . S I G . . . . . R L S A Y C G . . . . . A V T . A S C A A . V A A I A F L D . G . . .  
UniRef100\_UPI0009DD1839 . . . . . T L . L R A L V . I S N L V A V H Q K . . . . . A . . . . . G I G . . . . . S L S A Y C G . . . . . A T S . A G A A A . G A G I A F L L . G . . .  
UniRef100\_UPI0009DE0C1B . . . . . K L . Y R A L L . I S N L V T I H A K . . . . . S . . . . . G I G . . . . . R L S A Y C G . . . . . A V S . A G A G A . G A G I A F L Y . G . . .



UniRef100\_UPI0009DF0474 . . . . . K L . . . A K S L A . . . I S H L V T A Y V K . . . . . N . . . F T G . . . . . R L S A V C G . . . C G V A . . . A S T G A . . . T A G L A W L M S . . . G N I . . .  
UniRef100\_UPI0009E1BAB6 . . . . . E R . . . Y R A L A . . . M G L M S I H Q K . . . . . T . . . G I G . . . . . R L S A Y C G . . . A V S . . . A A C G A . . . A C G M S Y L E . . . R . . .  
UniRef100\_UPI0009E334B1 . . . . . S L . . . A R G L F . . . F A H I I N R Y V K . . . . . E . . . Y S G . . . . . K L S G L C G . . . C A I G . . . A A I G A . . . S A G I A F M L G . . . G S E . . .  
UniRef100\_UPI0009E6AA31 . . . . . K T . . . I R A L T . . . I S N L I A I H I K . . . . . T . . . Y L G . . . . . R L S A L C G . . . C . . . V V . . . A S T G S . . . S C G I T Y L L G . . . G E . . .  
UniRef100\_UPI0009E76B25 . . . . . K I . . . A R A V A . . . F S H L I T S Y I K . . . . . L . . . Y T G . . . . . R L S P V C G . . . C A V A . . . A G I G A . . . A S A M T W V L G . . . G N E . . .  
UniRef100\_UPI0009F89859 . . . . . T T . . . I R A L M . . . L S H M M A I Y I H . . . . . S . . . K L P . . . . . K L S A L C A . . . A . . . S T . . . A A M G A . . . A A G I A Y L T . . . K D . . .  
UniRef100\_UPI0009F905D5 . . . . . R L . . . L R A V A . . . L A D L V A I H T K . . . . . S . . . Y I G . . . . . A L S A F C G . . . V . . . V C . . . A A C G A . . . G A A I T W M S . . . G . . .  
UniRef100\_UPI000A02F418 . . . . . E L . . . I R A L A . . . V S T V V T I T V K . . . . . R . . . I L T . . . . . R M T N V C G . . . C T V A . . . G A S G V . . . A A G T V S L L G . . . G S R . . .  
UniRef100\_UPI000A039A04 . . . . . R T . . . L R A L A . . . L S H L V T A F V K . . . . . Q . . . Y T G . . . . . R L S T M C G . . . C A V A . . . A G A G A . . . A A A A T W L Q G . . . G K A . . .  
UniRef100\_UPI000A054DEE . . . . . T M . . . V K S L A . . . L S A T V T L L V K . . . . . N . . . K L G . . . . . S L S R I C S S . . . A . . . F A . . . G S W G I . . . A A A T L W L L G . . . S D . . .  
UniRef100\_UPI000A0591C9 . . . . . H L . . . I R A L F . . . L S H L M A I Y I H . . . . . S . . . K L P . . . . . K L S A L C A . . . A . . . T T . . . A A M G S . . . C A G I A W L L S . . . G K . . .  
UniRef100\_UPI000A05E698 . . . . . E T . . . L K A V M . . . M S C L I T S L I T . . . . . S . . . K F G . . . . . F V S S T C G . . . V V H A . . . A S V G L . . . I A G I L Y L . . . K . . . K R . . .  
UniRef100\_UPI000A1C9B8B . . . . . Q L . . . I R S L M . . . L S H L M V Y I K . . . . . Q . . . S L G . . . . . R L S A L C G . . . C . . . V V . . . A A T G A . . . S C G I T Y L M G . . . G N . . .  
UniRef100\_UPI000A7D81D4 . . . . . L R . . . L R A L T . . . L S H A V A L Y A H . . . . . A . . . G L P . . . . . V L S A F C A . . . A . . . A T . . . A A M G A . . . A A G V C F I L D . . . G S . . .  
UniRef100\_UPI000A919F2C . . . . . Q L . . . Y R A L L . . . V S D L V T I H Q K . . . . . T . . . G I G . . . . . R L S A Y C G . . . A . . . V S . . . A G C G A . . . G A G I A Y L F . . . G . . .  
UniRef100\_UPI000B02A458 . . . . . A L . . . I R A C A . . . L S N L T A I Y I K . . . . . Q . . . K F G . . . . . V L S A L C G . . . A . . . V S . . . A A S G A . . . A C G I T Y L L G . . . G D F . . .  
UniRef100\_UPI000B34E5B4 . . . . . K L . . . Y R A L L . . . V S N L V A I H Q K . . . . . T . . . A I G . . . . . R L S A Y C G . . . A . . . V S . . . A A C G A . . . G A A I T Y L S . . . G . . .  
UniRef100\_UPI000B34FC2F . . . . . T L . . . T R A L A . . . M S H L I A I Y I K . . . . . T . . . Y Q N . . . . . K L S A L C A . . . A . . . S T . . . A A M G S . . . S A A I T W M L G . . . G T . . .  
UniRef100\_UPI000B369692 . . . . . Q L . . . I R A L T . . . L S H L T A I Y I K . . . . . Q . . . S L G . . . . . K L S A L C G . . . C . . . V V . . . A A T G S . . . S C G I T Y L M G . . . G S . . .  
UniRef100\_UPI000B37B82C . . . . . L L . . . Y R A L L . . . I S N L V A I H Q K . . . . . K . . . Y I G . . . . . R L S A F C G . . . A . . . V S . . . A G A A A . . . G A G I A Y L L . . . D . . .  
UniRef100\_UPI000B398C94 . . . . . K L . . . Y R A L A . . . L S N L T A I Y I K . . . . . T . . . G I G . . . . . T L S A Y C G . . . A . . . V S . . . A G A A A . . . G A G I A Y L T . . . E . . .  
UniRef100\_UPI000B41319A . . . . . E L . . . A R A L M . . . L S H L T V I Y I K . . . . . Q . . . K L G . . . . . R L S A L C G . . . C . . . V T . . . A A T G S . . . S C G I V L L M G . . . G K . . .  
UniRef100\_UPI000B497A29 . . . . . Q L . . . I R A V A . . . L S N L I A I Y I K . . . . . T . . . K I G . . . . . R L S A L C G . . . A . . . T A . . . S G S G A . . . S C G I T Y L L G . . . G G K . . .  
UniRef100\_UPI000B803E6A . . . . . T L . . . Y R A L A . . . L S N L I S I H I K . . . . . T . . . G I G . . . . . K L S A F C G . . . A . . . V S . . . A S C A G . . . T A A I A Y L H . . . Q . . .  
UniRef100\_UPI000B8A9D7C . . . . . K V . . . L K A L A . . . L S I L V T I H T K . . . . . H . . . Y I G . . . . . R L S V L C G . . . C S I A . . . A A I G S . . . C C G I Y L L D . . . G N . . .  
UniRef100\_UPI000B96A611 . . . . . E L . . . I R A L T . . . L S H L T A I Y I K . . . . . Q . . . S L G . . . . . R L S A L C G . . . C . . . V V . . . A S I G S . . . S C G I T Y L M G . . . G Q . . .  
UniRef100\_UPI000B9AD5C9 . . . . . K L . . . A R A L I . . . L S N L V A I Y I K . . . . . S . . . Y Y P . . . . . P L S A F C G . . . N . . . T A . . . T S S A V . . . A M A M Y L M G . . . G D . . .  
UniRef100\_UPI000BE30C64 . . . . . K I . . . I R A I T . . . L S H L V T I F V K . . . . . S . . . Y T G . . . . . S L T P V C G . . . C G V A . . . A G V G S . . . S A G L T Y L F G . . . G N . . .  
UniRef100\_UPI000BE32075 . . . . . V L . . . I R A L V . . . L T N L L L H Q K . . . . . Q . . . Y I G . . . . . N L S A Y C G . . . A . . . V S . . . A G A A A . . . A C G I A Y L Q . . . G . . .  
UniRef100\_UPI000BEC9F6 . . . . . E L . . . I R A V T . . . L S H L L A I Y I K . . . . . N . . . Q F G . . . . . R L S A L C G . . . V . . . T V . . . A G A S A . . . S A A I T Y L L G . . . G D I . . .  
UniRef100\_UPI000BF17E78 . . . . . R L . . . A R A L M . . . L S H L S A I Y I H . . . . . H . . . Q L P . . . . . R L S A L C A . . . A . . . T T . . . A A M G A . . . A A G M A W L I D . . . G R . . .  
UniRef100\_UPI000BF7A1D0 . . . . . T M . . . I R A V T . . . L S H L I T I H I K . . . . . S . . . K F G . . . . . R L S A F C G . . . V . . . T V . . . S G V G A . . . S C G I A Y I M D . . . K K K . . .  
UniRef100\_UPI000C0740483 . . . . . T L . . . A R G L F . . . F A H V I I N R Y V K . . . . . E . . . Y S G . . . . . K L S G M C G . . . C A I G . . . A A I G A . . . S A A I A F M L D . . . G D E . . .  
UniRef100\_UPI000C079C6A . . . . . K L . . . S K A L A . . . I S H L V T G Y I K . . . . . N . . . Y T G . . . . . R L S A V C G . . . C G V A . . . A S T G S . . . A A A I T W L M D . . . G T Y . . .  
UniRef100\_UPI000C085CDF . . . . . D L . . . Q R G L L . . . F A N L L G L Y Q K . . . . . K . . . N I G . . . . . K L S A Y C G . . . V . . . V S . . . A A S S A . . . I C G L A F L K . . . G . . .  
UniRef100\_UPI000C0899A6 . . . . . K L . . . L R A L V . . . I S N L V T I H Q K . . . . . T . . . G I G . . . . . R L S A Y C G . . . V . . . I T . . . A G S G C . . . G A G I A Y L H . . . G . . .  
UniRef100\_UPI000C126F74 . . . . . T L . . . I R A L A . . . L S H L I A V I Y H . . . . . T . . . R L P . . . . . K L S A L C A . . . V . . . T T . . . A S M G A . . . A A G M A Q L L N . . . G G . . .  
UniRef100\_UPI000C1C4F8C . . . . . K L . . . Y R A L I . . . V S N L I G I H Q K . . . . . R . . . F I G . . . . . K L S A F C G . . . A . . . V S . . . A G A G A . . . C G G I A Y L M . . . G . . .  
UniRef100\_UPI000C704F69 . . . . . T L . . . I R G L F . . . F S H M T I T I H I K . . . . . S . . . N I G . . . . . R L S A Y C G . . . A . . . I C . . . A S A G V . . . A G A I S F V D . . . G . . .  
UniRef100\_UPI000C756D7A . . . . . A L . . . L R A T A . . . L S Y L I T M Y I K . . . . . E . . . Y S G . . . . . K L S A F C G . . . C G I A . . . A G T G M . . . A C G L A Y L Q G . . . A E E . . .  
UniRef100\_UPI000C7898D9 . . . . . Q L . . . I R A L T . . . L S N L V A I Y I K . . . . . E . . . S L G . . . . . R L S A L C G . . . C . . . V V . . . A S T G S . . . S C G I T Y L M G . . . G E . . .  
UniRef100\_UPI000C790D6F . . . . . R M . . . Y R A L A . . . V S N L L A I H Q K . . . . . A . . . Y I G . . . . . V L S A Y C G . . . A . . . V S . . . A G S A S . . . A A G I A Y L E . . . G . . .  
UniRef100\_UPI000C7A5CFB . . . . . E L . . . L R A L A . . . V S N L I S L H Q K . . . . . K . . . Y I G . . . . . S L S A Y C G . . . A . . . V S . . . A A T G S . . . A A A I C W L M . . . G . . .  
UniRef100\_UPI000C7B0E47 . . . . . K L . . . Y R A L L . . . L S N L L T L H Q K . . . . . T . . . G I G . . . . . R L S A Y C G . . . A . . . V S . . . A G A G A . . . G A G I A Y L K . . . G . . .  
UniRef100\_UPI000C7B4464 . . . . . K L . . . Y R A L A . . . L S N L V S T Q Q K . . . . . K . . . Y I G . . . . . S L S A Y C G . . . A . . . V S . . . A A T G A . . . A C G I A Y L Q . . . D . . .  
UniRef100\_UPI000C7BBC84 . . . . . K M . . . Y R A L V . . . V S N L L S I H Q K . . . . . Q . . . Y V G . . . . . R L S A Y C G . . . A . . . V S . . . A A C G A . . . G A A I M Y M S . . . G . . .  
UniRef100\_UPI000C7B66C1 . . . . . K L . . . Y R A L C . . . I S N L T A I H Q K . . . . . S . . . M I G . . . . . R L S A Y C G . . . A . . . V S . . . A A T G A . . . G A A I A Y L H . . . G . . .  
UniRef100\_UPI000C838674 . . . . . R L . . . L R A L A . . . L S D L V S I H V K . . . . . S . . . Y I G . . . . . A L S A F C G . . . A . . . V C . . . A A C G A . . . G A A I T W M S . . . G . . .  
UniRef100\_UPI000C8393D6 . . . . . K L . . . Y R A L V . . . V S N L I S V H Q K . . . . . R . . . Y I G . . . . . N L S A Y C G . . . A . . . V S . . . A G T A A . . . A C G I A Y L D . . . G . . .  
UniRef100\_UPI000C852B7D . . . . . R L . . . L Q A L A . . . F S N L V T V R L K . . . . . A . . . G I G . . . . . R L S A Y C G . . . V . . . V C . . . A A C C A . . . M S A I T Y L Q . . . N . . .  
UniRef100\_UPI000C8536EC . . . . . K K . . . L R A A A . . . L A N L V N I Y V K . . . . . S . . . F T G . . . . . T L S A V C A . . . C G V A . . . S G L G A . . . S V G V Y M L G . . . G G . . .  
UniRef100\_UPI000C8567A5 . . . . . N L . . . L R A V A . . . L S D L V T V H I K . . . . . Q . . . G I G . . . . . R L S A L C G . . . C G I A . . . A A V G A . . . S C G I L Y L L G . . . N . . .  
UniRef100\_UPI000C860EC0 . . . . . S L . . . L R A Q A . . . L S Q L V T I H I K . . . . . T . . . H I G . . . . . R L S P L C G . . . C A I A . . . A S I G S . . . C C A I T Y L L G . . . G T . . .  
UniRef100\_UPI000C86486F . . . . . Q L . . . L R A V A . . . L A D L V A V H Q K . . . . . S . . . Y I G . . . . . A L S A F C G . . . V . . . V C . . . A A C G A . . . A A A I T W M R . . . G . . .  
UniRef100\_UPI000CDB216C . . . . . R L . . . V R A L A . . . L S H L I A V Y H K . . . . . S . . . F S D . . . . . K L S A F C G . . . A . . . V T . . . A A V G A . . . G C G V T F L L G . . . G G . . .  
UniRef100\_UPI000CEE9E5C . . . . . K L . . . Y R A L V . . . L S N L I A I L Q K . . . . . K . . . H I G . . . . . K L S A F C G . . . V . . . V C . . . A A T G A . . . A S G I A Y L N . . . N . . .  
UniRef100\_UPI000CF192D3 . . . . . L . . . N R A L F . . . L S H L I A V Y I H . . . . . S . . . K L P . . . . . R L S A L C A . . . V . . . T T . . . A G I G S . . . Y A G I A W L F S . . . K D . . .  
UniRef100\_UPI000CF9CB2C . . . . . E T . . . L R A L I . . . V G D L I S V Y I K . . . . . H . . . Y I G . . . . . P L S A F C G . . . A . . . V N . . . A A C G A . . . G A A I T W M A . . . T . . .  
UniRef100\_UPI000CFACD79 . . . . . R M . . . I K A I V . . . V G Y G T T L Y T K . . . . . R . . . V L G . . . . . K L S S V C G . . . C A I A . . . S S I G A . . . T V G I I W M G . . . G S . . .  
UniRef100\_UPI000D08EFB8 . . . . . Q V . . . Y R A L A . . . L S N L V A I H Q K . . . . . Q . . . G I G . . . . . R L S A Y C G . . . A . . . V S . . . A G A A A . . . G A G I A Y L C . . . G . . .  
UniRef100\_UPI000D08EAF6E . . . . . E L . . . I R A L T . . . L S H L T A I Y I K . . . . . T . . . N L G . . . . . K L S A L C G . . . C . . . V V . . . A S I G S . . . S C G I T Y L M G . . . G D . . .  
UniRef100\_UPI000D08ED673 . . . . . L L . . . L R A T A . . . L S Y L I T M Y I K . . . . . E . . . Y S G . . . . . K L S A F C G . . . C G I A . . . A G T G M . . . A C G L A Y L R G . . . G G E . . .  
UniRef100\_UPI000D14E74A . . . . . K L . . . I R A L T . . . L S H L T A I Y I H . . . . . A . . . F L P . . . . . L L S A Y C A . . . T . . . D S . . . A A M G A . . . A A G L I Y L E S . . . E D . . .  
UniRef100\_UPI000D16B181 . . . . . H L . . . I R A L I . . . L S H L M A I Y I K . . . . . S . . . Y Q N . . . . . K L S A L C G . . . A . . . T T . . . A S M G A . . . V S G I T W L L G . . . G N . . .  
UniRef100\_UPI000D1756B8 . . . . . T L . . . A R A L I . . . M S H L G A V Y I K . . . . . S . . . H Y P . . . . . P L S A F C G . . . N . . . T A . . . T S A A A . . . A M A M Y L R G . . . G N . . .  
UniRef100\_UPI000D1E7FE7 . . . . . R L . . . Y R S L A . . . A A N L I A I H Q K . . . . . K . . . Y I G . . . . . S L S A Y C G . . . A . . . V S . . . A A C G A . . . G A G I A Y M L . . . G G . . .  
UniRef100\_UPI000D383FBF . . . . . K L . . . A R A L I . . . L S H L S A I Y I H . . . . . N . . . Q L P . . . . . R L S A L C A . . . T . . . T T . . . A A M G A . . . A A G M A L L A G . . . G D . . .  
UniRef100\_UPI000D3A1105 . . . . . K L . . . Y R A L V . . . L S N L I A I L Q K . . . . . K . . . H I G . . . . . K L S A F C G . . . V . . . V C . . . A A T G A . . . A S A I A Y L N . . . D . . .  
UniRef100\_UPI000D3E07D8 . . . . . K M . . . I R A V A . . . L S H L I T I H I K . . . . . S . . . K F G . . . . . R L S A L C G . . . V . . . T A . . . A G M G A . . . S G A I V Y L L D . . . G D L . . .  
UniRef100\_UPI000D3ED3B7 . . . . . A T . . . I R A L M . . . M S H L M A I Y I K . . . . . S . . . Y Q H . . . . . K L S A L C G . . . A . . . T T . . . A S M G A . . . V A G M T W L L G . . . G E . . .  
UniRef100\_UPI000D54E33D . . . . . D L . . . I R A L I . . . L S H L I V T C I K . . . . . Q . . . K L G . . . . . R L S A L C G . . . C . . . V A . . . A A T G A . . . S C G I T Y L M G . . . G D . . .  
UniRef100\_UPI000D6459D2 . . . . . K I . . . T R A L A . . . V A H F T N M Y L R . . . . . A . . . Y T G . . . . . K L S P L C G . . . A . . . V T . . . G G A G V . . . A A A I C W L L G . . . G S H . . .  
UniRef100\_UPI000D648457 . . . . . K R . . . L R A L F . . . L S H L M A I Y I H . . . . . S . . . K L P . . . . . K L S A L C A . . . V . . . T T . . . A S M G S . . . C A G I A Y L T L . . . G K . . .  
UniRef100\_UPI000D6A8123 . . . . . T L . . . Y R A L L . . . V S N L S T I H Q K . . . . . S . . . H I G . . . . . R L S A Y C G . . . A . . . V S . . . A G A G A . . . G A G I A W L L . . . G . . .  
UniRef100\_UPI000D78245F . . . . . Q L . . . F R A L A . . . V S N L L A I H Q K . . . . . K . . . Y I G . . . . . K L S A Y C G . . . A . . . I S . . . A S A G A . . . G A A I A W L Q . . . G . . .  
UniRef100\_UPI000DC1E517 . . . . . E L . . . V R A L T . . . L S H L T A I Y I K . . . . . Q . . . N L G . . . . . A L S A L C G . . . C . . . I V . . . A C T G S . . . S C G I T Y L M G . . . G D . . .  
UniRef100\_UPI000DD46ABB . . . . . E L . . . I R A L A . . . L S H L V A I S V H . . . . . A . . . R Y T . . . . . R L S A L C A . . . A . . . S T . . . A A M G A . . . A A G M A W L F T . . . R D . . .  
UniRef100\_UPI000DE353AA . . . . . E L . . . A R A L I . . . L S N L V A I H Q K . . . . . T . . . N L G . . . . . K L S A L C G . . . V . . . I V . . . A G I G A . . . G C G M T Y L L G . . . G D . . .  
UniRef100\_UPI000DE3B614 . . . . . T L . . . Y R A L V . . . I S N L I A V H L K . . . . . T . . . G I G . . . . . R L S A Y C G . . . A . . . V S . . . A G C A A . . . G C G I A Y L Q . . . G . . .  
UniRef100\_UPI000DE3E565 . . . . . K M . . . Y R A L V . . . L A N L I T I H Q K . . . . . T . . . N L G . . . . . R L S A Y C G . . . A . . . V N . . . A A C G S . . . G A G L T Y L E . . . D . . .  
UniRef100\_UPI000DE4BEB8 . . . . . A L . . . L R A T A . . . L S Y L I C M Y I K . . . . . E . . . Y S G . . . . . K L S A F C G . . . C A I A . . . A G T G M . . . A C G L V N L R G . . . G D K . . .  
UniRef100\_UPI000DE61C72 . . . . . F L . . . I R C L F . . . F S H M S T I H I K . . . . . T . . . N V G . . . . . R L S A Y C G . . . V . . . I C . . . A A A A V . . . A G A L C M V Q . . . R . . .  
UniRef100\_UPI000DECC5CD . . . . . Q L . . . T R A L M . . . L S H L M A V Y I K . . . . . S . . . R L P . . . . . K L S A L C A . . . V . . . T T . . . A S M G A . . . A A G M A L L L G . . . G G . . .  
UniRef100\_UPI000DEF03C7 . . . . . K L . . . Y R A V A . . . L S D L V T Y Q K . . . . . T . . . G I G . . . . . R L S A F C G . . . A . . . V C . . . A G C G S . . . G A G I A Y L H . . . G . . .  
UniRef100\_UPI000DEF259B . . . . . T L . . . A R A L M . . . L S H L M A I F T K . . . . . S . . . K L P . . . . . T L S A L C A . . . A . . . T T . . . A A M G A . . . A A G M A W L F K . . . K D . . .  
UniRef100\_UPI000DF1438D . . . . . K L . . . L R A L A . . . L S N L I T I Y I K . . . . . T . . . A T G . . . . . S L S A M C G . . . V A V A . . . A G V G V . . . S A S T V Y M L D . . . G K . . .  
UniRef100\_UPI000DF6DC3C . . . . . Q L . . . Y R A L V . . . L S N L V A I H Q K . . . . . T . . . G I G . . . . . R L S A F C G . . . A . . . V C . . . A G A A A . . . G A G I A Y L D . . . G . . .  
UniRef100\_UPI000E0A886D . . . . . Q T . . . I R A L M . . . L S H L M A I Y V K . . . . . S . . . Y Q N . . . . . K L S A L C G . . . A . . . T T . . . A S M G S . . . A A G I T Y L L G . . . G N . . .  
UniRef100\_UPI000E294F6E . . . . . K T . . . I R A L F . . . L S H A L A I Y I H . . . . . A . . . K L P . . . . . T L S S L C A . . . A . . . N T . . . A A M G S . . . A G A C A W L F S . . . E R . . .  
UniRef100\_UPI000E36D8D3 . . . . . D L . . . A R A L V . . . M S F L V M H I K . . . . . E . . . Y M G . . . . . R L S P L C G . . . S G I A . . . G G T G S . . . C C G M T Y L L G . . . G N . . .  
UniRef100\_UPI000E415A64 . . . . . K K . . . Y R A L A . . . L S N L T A I H Q K . . . . . T . . . G I G . . . . . R L S A Y C G . . . A . . . V S . . . A G A A A . . . G A G I A Y L C . . . G . . .  
UniRef100\_UPI000E415E63 . . . . . I L . . . Y R A T M . . . L S Y L V C T Y I K . . . . . E . . . Y S G . . . . . R L S A F C G . . . C A I A . . . A G S G M . . . A C G V C Y M K G . . . G R L . . .  
UniRef100\_UPI000E4A5D29 . . . . . E I . . . K R A L L . . . L S Q L V T V Y I K . . . . . Q . . . K T G . . . . . K L S S L C G . . . S A L A . . . A G A G M . . . A S G M T Y L Q G . . . G K . . .  
UniRef100\_UPI000E5516D8 . . . . . K L . . . Y R A L L . . . V S N L L S I Y Q K . . . . . H . . . Y I G . . . . . S L S A F C G . . . A . . . V T . . . A A C G S . . . G A A L T Y M C . . . G . . .  
UniRef100\_UPI000E69E6A7 . . . . . K L . . . Y R A L L . . . V S N L L S I Y Q K . . . . . H . . . Y I G . . . . . S L S A F C G . . . A . . . V T . . . A A C G S . . . G A A L T Y L S . . . G . . .  
UniRef100\_UPI000E686D30 . . . . . R L . . . C R A L M . . . L S H L T A I Y I H . . . . . S . . . K L P . . . . . K L S A L C A . . . A . . . T T . . . A S M G A . . . A A G M A W L L G . . . G E . . .  
UniRef100\_UPI000EF8FBF3 . . . . . A L . . . A R A F I . . . M S H L G A I Y I K . . . . . S . . . H Y P . . . . . P L S A F C G . . . N . . . V T . . . T S A A A . . . A M A M V L A G . . . G T . . .  
UniRef100\_UPI000EFC8C67 . . . . . Q T . . . I R A L T . . . L S H L T V I Y I K . . . . . Q . . . S L G . . . . . R L S A L C G . . . C . . . V V . . . A A T G S . . . S C G I V Y L M G . . . G G . . .  
UniRef100\_UPI000F04B479 . . . . . K L . . . Y R T L V . . . V S N L T A I H Q K . . . . . K . . . Y I G . . . . . N L S A Y C G . . . A . . . V S . . . A A C G S . . . G A A I T Y L Y . . . D . . .  
UniRef100\_UPI000F081968 . . . . . K I . . . I R S V T . . . L S H L I T I Y V K . . . . . S . . . Y T G . . . . . A L S P V C G . . . C G V A . . . A G V G A . . . S A G I T Y L L D . . . G S . . .  
UniRef100\_UPI000F08C649 . . . . . Q Q . . . L R A L T . . . L S Q L L A I Y I K . . . . . A . . . Q Q H . . . . . K L S A L C G . . . A . . . T T . . . A G M G A . . . T A G I T H L L G . . . G D . . .  
UniRef100\_UPI000F52D358 . . . . . R I . . . Y R A L A . . . L S N L T A I H Q K . . . . . T . . . P I G . . . . . R L S A Y C G . . . A . . . V S . . . A G A G A . . . G A G I A Y L C . . . G . . .  
UniRef100\_UPI000F63E4E3 . . . . . K I . . . I R S V A . . . L S H L V T I Y I K . . . . . S . . . Y T G . . . . . A L S P V C G . . . C G V A . . . A G V G A . . . S A G I T Y L L G . . . G D . . .

UniRef100\_UPI000F63FEC6 . . . . . KM . YRALV LSNLIAIHQK . . . . . T . . . . . GI G . . . . . PLSAYCG . A . VS . AGCAS . GAAIAYLK . G . . . . .  
UniRef100\_UPI000F6449DF . . . . . KM . LRSVM ISILLTIRIK . . . . . Y . . . . . HV G . . . . . RLSPICG . A . TL . SGAAG . AGAVWLMG . GNR . . . . .  
UniRef100\_UPI000F68E51C . . . . . QL . VRALF LSHLMAYIYH . . . . . S . . . . . KLP . . . . . KLSALCA . V . ST . AAMGS . CAGVWLLT . GK . . . . .  
UniRef100\_UPI000F778D8E . . . . . KF . IRALA LSHLVAIYIH . . . . . S . . . . . FL P . . . . . VLSAFCA . A . TT . ASMGA . AVGICYLFD . ED . . . . .  
UniRef100\_UPI000F7823C1 . . . . . RL . IKALT LSHLTALYIH . . . . . A . . . . . FL P . . . . . VLSAFCA . T . DS . AAMGA . AAGSIYLLK . ND . . . . .  
UniRef100\_UPI000F784D51 . . . . . KL . IRALT LSHLTALYIH . . . . . A . . . . . FL P . . . . . VLSAYCA . V . DS . ASMGA . GVCIIYLLD . DN . . . . .  
UniRef100\_UPI000F78F92D . . . . . KF . IRALA LSHLVAIYIH . . . . . S . . . . . FL P . . . . . VLSAFCA . A . DS . AAMGS . AVGVCYLLD . EN . . . . .  
UniRef100\_UPI000F796C8D . . . . . HL . LRALT LSHLTALYAH . . . . . A . . . . . YL P . . . . . VLGPFCA . T . DT . AAMGA . AVGSIYLLA . LG . . . . .  
UniRef100\_UPI000F79C1FE . . . . . QL . IRALT LSHLTALYIH . . . . . A . . . . . FL P . . . . . VLSAYCA . V . DS . AAMGA . GTGCYLLK . NN . . . . .  
UniRef100\_UPI000F79F9B0 . . . . . TL . VRGIT LSHLTALYIH . . . . . A . . . . . FL P . . . . . VLSAFCA . T . DS . AAMGA . AAGVYLLM . DD . . . . .  
UniRef100\_UPI000F79FC33 . . . . . DL . IRALT VSHLTALYIH . . . . . S . . . . . FL P . . . . . VLSAFCA . T . DS . AAMGA . ATGCYLLT . ND . . . . .  
UniRef100\_UPI000F7ACB4C . . . . . QL . IRALT VSHLTALYIH . . . . . A . . . . . FL P . . . . . VLSAYCA . V . DS . AAMGA . GVCYIYLLK . ND . . . . .  
UniRef100\_UPI000F7AFBE3 . . . . . QL . IRALT LSHLTALYIH . . . . . A . . . . . FL P . . . . . VLSAFCA . T . DS . AAMGA . ATGSIYLLT . ND . . . . .  
UniRef100\_UPI000F8EDFB2 . . . . . EL . YRALV FANLLTLYVK . . . . . S . . . . . GI G . . . . . KLSAYCG . V . VS . AGIVS . VTGIAFLK . G . . . . .  
UniRef100\_UPI000FD68C51 . . . . . QL . IRAVA LSHLVTIYHK . . . . . S . . . . . KF G . . . . . RLSALCG . V . TV . SGTGA . SCGITYLLG . GKG . . . . .  
UniRef100\_UPI000FDD8619 . . . . . QL . AARLM LSHLSAIYIH . . . . . H . . . . . QLP . . . . . RLSALCA . A . TT . ASMGA . AAGMVLLD . GR . . . . .  
UniRef100\_UPI001012BBEA . . . . . KV . KKAIL LSMLTITYYK . . . . . S . . . . . YTG . . . . . VLTPTIC . AGST . ASAGV . SAGIYVLLK . GN . . . . .  
UniRef100\_UPI00101DE188 . . . . . DL . VKALA LSHIINSYIK . . . . . F . . . . . YIG . . . . . RLSALCG . CGVA . AATGA . SVAIWLMG . GNK . . . . .  
UniRef100\_UPI001021529F . . . . . QM . YRGLI LASLVTIYHK . . . . . T . . . . . FIG . . . . . RLSAYCG . A . VS . AACGS . GAALTLYLK . G . . . . .  
UniRef100\_UPI00102897E6 . . . . . KR . IRALF LSHLMATFIH . . . . . S . . . . . KLP . . . . . KLSALCA . V . TT . AAMGS . CAGIYLLT . NK . . . . .  
UniRef100\_UPI00102803B8 . . . . . EL . IRALV LANLTAIRIK . . . . . Q . . . . . SIG . . . . . YLSAYCG . A . VC . AGCGA . AAGVAYLH . G . . . . .  
UniRef100\_UPI00102F89E5 . . . . . RL . IRALL ISNLIAYVQK . . . . . A . . . . . EIG . . . . . RLSAYCG . A . VS . AATAS . VVGIAWLD . S . . . . .  
UniRef100\_UPI001030090E . . . . . EM . LRAVT LSDLTAIYHK . . . . . R . . . . . FIG . . . . . ELSAFCG . A . VT . VATGA . GAACVYLR . G . . . . .  
UniRef100\_UPI0010300BE6 . . . . . KL . YRALV LSNLLAIHQK . . . . . S . . . . . TIG . . . . . RLSAYCG . A . IN . AGAAA . GCGIAYLE . G . . . . .  
UniRef100\_UPI0010309D70 . . . . . RL . YRALT LSNLTAIYHK . . . . . E . . . . . GI G . . . . . RLSAYCG . A . VS . AGASA . GAGIAYLL . G . . . . .  
UniRef100\_UPI001030B3CB . . . . . AL . YRALL ISDLVTIYQK . . . . . V . . . . . GI G . . . . . RLSAYCG . A . VS . AGVGA . GAGIAYLL . G . . . . .  
UniRef100\_UPI001030BBEB . . . . . KL . VKALA LSHVINCXYIK . . . . . S . . . . . YIG . . . . . RLSALCG . CAVA . AGTGA . SAAITWLMG . GSY . . . . .  
UniRef100\_UPI0010317AA6 . . . . . KL . YRALT LSNLLSIHLK . . . . . M . . . . . GIG . . . . . KLSAYCG . A . VS . AACGC . GAAISYLY . G . . . . .  
UniRef100\_UPI0010318F6C . . . . . LL . LRATA LSYLVTITLKG . . . . . Q . . . . . RIG . . . . . RHSVCMCA . CVVA . ASEGV . AAGTALLK . GGI . . . . .  
UniRef100\_UPI0010321B14 . . . . . DL . YRALI FSNLISLYIK . . . . . S . . . . . EVG . . . . . KLSAYCG . V . VS . ASAS . ISSIAFIN . N . . . . .  
UniRef100\_UPI0010477C7A . . . . . RL . VRAVF FAHMINRYIK . . . . . A . . . . . YTG . . . . . KLSAMCG . CAIA . AGIGA . SGGITWLLG . GND . . . . .  
UniRef100\_UPI001047AA39 . . . . . DL . AKALA LSHIITISYVK . . . . . K . . . . . YIG . . . . . RLSNLCG . CS LA . ASIGS . GSAIYLLS . GRD . . . . .  
UniRef100\_UPI0010632499 . . . . . LL . NRALF LSHLVAIYIH . . . . . N . . . . . KLP . . . . . RLSALCA . V . ST . ASIGS . FAGIAWLLS . ED . . . . .  
UniRef100\_UPI001073345B . . . . . RL . AARLM LSHLGAIYIH . . . . . N . . . . . QLP . . . . . RLSALCA . A . TT . AAMGA . AAGMAWLLD . DR . . . . .  
UniRef100\_UPI0010E59F1D . . . . . SL . FRALI LSNLIAIYEH . . . . . S . . . . . FIG . . . . . KLSAYCG . V . VC . ASSGA . AAIITFLK . G . . . . .  
UniRef100\_UPI0010FEA622 . . . . . IL . YRSLI FANLIGLYIK . . . . . Q . . . . . GIG . . . . . KLSAYCG . V . VA . ASAS . MCGIAMLO . G . . . . .  
UniRef100\_UPI0010FF47EC . . . . . KL . AARLV LSNLIAIHQK . . . . . K . . . . . YLG . . . . . RLSALCG . C . VV . ASAGA . SCGITYLLG . GQ . . . . .  
UniRef100\_UPI00110640D9 . . . . . KL . YRSLV VSNLVAIHQK . . . . . Y . . . . . YIG . . . . . SLSAYCG . A . VS . AACGA . GAGITMYM . G . . . . .  
UniRef100\_UPI0011069AFD . . . . . EL . LRALC VSNLTAQDQK . . . . . R . . . . . YIG . . . . . PLSAYCG . A . VC . AAAGA . GAGITYLC . G . . . . .  
UniRef100\_UPI0011070C3B . . . . . KM . YRALA LSNLVAIHQK . . . . . R . . . . . CIG . . . . . TLSAYCG . A . VS . AGGAA . GAGIAYLH . G . . . . .  
UniRef100\_UPI001107153E . . . . . DL . LGRIA LSYLTAISI . . . . . H . . . . . RIG . . . . . KAPSMCS . CEVA . AALGI . AAGATLMRG . GTY . . . . .  
UniRef100\_UPI001158928E . . . . . QL . AARLA LSHLVAIYIH . . . . . C . . . . . KLP . . . . . RLSALCA . A . TT . AAMGA . ASGILWLMN . GS . . . . .  
UniRef100\_UPI0011589DBD . . . . . KL . VRALI LANLTAIHIK . . . . . S . . . . . YLG . . . . . RLSALCG . C . VV . ASSGA . SAGIYVLLG . GN . . . . .  
UniRef100\_UPI00115D02D5 . . . . . QL . AARLA LSHLVAIYIH . . . . . C . . . . . KLP . . . . . RLSALCA . T . TT . AGMGA . AAGIYLLM . GS . . . . .  
UniRef100\_UPI001178C98E . . . . . KL . YRAVV LSDLTIYHK . . . . . T . . . . . GIG . . . . . RLSAYCG . A . VS . AGAGS . GAGIAYLY . G . . . . .  
UniRef100\_UPI001183AA94 . . . . . LI . AESVA FSHLVTGYVK . . . . . T . . . . . YTG . . . . . RLTPICG . CSVA . AGAGA . AAGMVRLG . GT . . . . .  
UniRef100\_UPI00119CAB58 . . . . . KL . YRALI FSNLIGLYQK . . . . . Q . . . . . RIG . . . . . KLSAYCG . V . VS . ASAS . VCGIGFLQ . D . . . . .  
UniRef100\_UPI0011A1EBCE . . . . . AL . AARLI LSHLMATFIH . . . . . S . . . . . QLP . . . . . ALSALCA . A . TT . AAMGA . AAGMAWLF . PR . . . . .  
UniRef100\_UPI0011A474CD . . . . . RM . IRAVA LSHLTIYHK . . . . . S . . . . . KF G . . . . . RLSALCG . V . TT . AGMGA . SAGIYVLL . GGL . . . . .  
UniRef100\_UPI0011A6BE87 . . . . . RL . LRAAA LSDLVAIHVK . . . . . S . . . . . YIG . . . . . ALSAFCG . A . VC . AACGA . GAAITWMA . G . . . . .  
UniRef100\_UPI0011C3E3AE . . . . . EL . IRLGF VSHLTIYHK . . . . . T . . . . . NVG . . . . . RLSAYCG . A . IC . AASGV . AALITFLH . G . . . . .  
UniRef100\_UPI0011C7A661 . . . . . NL . LRATA LSYLITMYIK . . . . . E . . . . . YSG . . . . . RLSAFCG . CAIA . AGTGM . ACALVFMKN . GTI . . . . .  
UniRef100\_UPI0011C7B69A . . . . . SL . VRALI MSHLTAIHLK . . . . . H . . . . . HLG . . . . . RLSALCG . A . LL . AATGS . SCGMVLMG . GG . . . . .  
UniRef100\_UPI0011C9D6B6 . . . . . KL . IRAMV LANLISIHQK . . . . . R . . . . . FIG . . . . . NLSAYCG . A . TS . AATAA . AGCVAYLY . D . . . . .  
UniRef100\_UPI0011C9F067 . . . . . QT . IRALT LSHLTVIYHK . . . . . Q . . . . . SLG . . . . . RLSALCG . C . VV . AATGS . SCGIAYLLM . GG . . . . .  
UniRef100\_UPI0011CBAB3A . . . . . TV . LKAIA LSHVITGYVK . . . . . A . . . . . YTG . . . . . RLSAVCG . CSVA . AGAGA . TAGITYLLG . GT . . . . .  
UniRef100\_UPI0011CC227F . . . . . RL . AKALA LSHLTIAYVK . . . . . N . . . . . FTG . . . . . RLSAVCG . CGVA . ASTGA . TAGISWLM . GDI . . . . .  
UniRef100\_UPI0011CC5522 . . . . . EI . RRAVA FSHMVTIFVK . . . . . S . . . . . YLG . . . . . ALSPICG . CGVA . AGVGC . AAGLTFLRK . GT . . . . .  
UniRef100\_UPI0011DDB73B . . . . . KL . CRALI VSNLISIHQK . . . . . Y . . . . . YIG . . . . . KLSAFCG . A . VS . AGCS . GAAITYMH . G . . . . .  
UniRef100\_UPI0011DDBD5E . . . . . ET . VRALM LSHLVVIYIK . . . . . Q . . . . . TLG . . . . . RLSALCG . C . VV . AATGS . SCGIVSLMG . GG . . . . .  
UniRef100\_UPI0011DE2D02 . . . . . KM . LRAVV FSNMTIYVK . . . . . S . . . . . KLG . . . . . KLSAYCG . A . VS . AACAS . GAAITYML . G . . . . .  
UniRef100\_UPI001243264B . . . . . IL . VRAVA LSDLTIYHK . . . . . S . . . . . YIG . . . . . RLSALCG . A . IV . AAIGA . SCAIVYMLG . GD . . . . .  
UniRef100\_UPI00124490F0 . . . . . SV . LEAIG LSHIITAYVK . . . . . A . . . . . HTG . . . . . RLSAVCG . CSVA . AGAGA . AAGITYLLG . GT . . . . .  
UniRef100\_UPI0012470AD1 . . . . . TK . YRALI ISNLTITHLK . . . . . T . . . . . GIG . . . . . RLSAYCG . A . VS . AGCS . GAAIAYLY . G . . . . .  
UniRef100\_UPI001248AE0F . . . . . PL . AARLI MSHLTAIYHK . . . . . H . . . . . YLG . . . . . RLSALCG . A . VL . AATGA . SCGMVLMG . GG . . . . .  
UniRef100\_UPI00125871DF . . . . . KL . AKALA LSHIITAYIK . . . . . S . . . . . HTG . . . . . KLTALCG . CAVA . AATGA . SASIVWLM . GT . . . . .  
UniRef100\_UPI001258984B . . . . . KL . AKAIA MSHIINSYIK . . . . . N . . . . . YIG . . . . . RLSVLCG . CGVS . AGTGA . AVAITWLM . GSI . . . . .  
UniRef100\_UPI00125F767C . . . . . AM . LRALA FSNLITVYIK . . . . . S . . . . . FTG . . . . . TLSAMCG . CGVA . AGIGA . CAGVSYMMG . AS . . . . .  
UniRef100\_UPI00128B840A . . . . . KL . LRAIA LSLITVYIK . . . . . S . . . . . YMG . . . . . RISPLCG . AGIA . ASTGA . GAGITYLSG . GN . . . . .  
UniRef100\_UPI00128BB528 . . . . . KL . LRALA LALLITMYIK . . . . . S . . . . . FVG . . . . . QLSALCG . V . LL . STAGA . ACGITYMG . GT . . . . .  
UniRef100\_UPI00129AC328 . . . . . QL . TRALI LSHLIAIHQK . . . . . S . . . . . HLN . . . . . VLSALCA . A . TT . AGTGA . SAAIYLLH . DKEK . . . . .  
UniRef100\_UPI0012AB7299 . . . . . DL . AARLV ISDLVTHMK . . . . . E . . . . . YMG . . . . . RLSPLCG . SGIA . GGTGS . CCGITYLQ . GG . . . . .  
UniRef100\_UPI0012ABE8FD . . . . . QM . LRATA ISYLVMTYMK . . . . . E . . . . . FSG . . . . . KLSAFCG . CGIA . GGTGL . ACALAYLMG . GDE . . . . .  
UniRef100\_UPI0012ADCC21 . . . . . TK . LRALA LGLLISIHMK . . . . . S . . . . . YVG . . . . . QLSATCG . V . LL . STSGA . ACAITYMMG . GE . . . . .  
UniRef100\_UPI0012AF4322 . . . . . IL . LRAAA LSYLITMYIK . . . . . E . . . . . YSG . . . . . KLSAFCG . CGIA . AGTGM . ACALAFMMN . ADE . . . . .  
UniRef100\_UPI0012AF8FD9 . . . . . KM . LKAVA LGDLLSYIN . . . . . A . . . . . KIG . . . . . KLVAMCT . CVAA . ASTAA . SVSMTWLMG . GD . . . . .  
UniRef100\_UPI0012B1F23C . . . . . AL . LRATA LSYLVCMYIK . . . . . E . . . . . YSG . . . . . KLSAFCG . CAIA . AGTGT . ACGLTMLRG . GGI . . . . .  
UniRef100\_UPI0012B202BF . . . . . KI . IRSIT LSHLVTIYVK . . . . . S . . . . . YIG . . . . . SLSPVCG . CGVA . AGVGC . AAGLTFFMG . GN . . . . .  
UniRef100\_UPI0012B20D78 . . . . . DL . VRAVV LSDLTAVHVK . . . . . Y . . . . . FIG . . . . . ELSAFCG . A . VS . ASCGA . GAGICYLR . G . . . . .  
UniRef100\_UPI0012B29F2C . . . . . KK . YRALT LSNLTAIHQK . . . . . T . . . . . FIG . . . . . RLSAYCG . A . VS . AGAGA . GAGIAYLC . G . . . . .  
UniRef100\_UPI0012B2C833 . . . . . KL . YRALV LSNLVTIYHK . . . . . T . . . . . GIG . . . . . RLSAYCG . A . VS . AGCS . GAGIAYLH . G . . . . .  
UniRef100\_UPI0012B2DDAA . . . . . MT . IRALV LSNLLAIYQK . . . . . Y . . . . . RIG . . . . . RLSAYCG . A . VS . AAAGA . GAGITYLY . G . . . . .  
UniRef100\_UPI0012B2EB59 . . . . . KI . IRGVA ISCLITVYIR . . . . . Q . . . . . WVS . . . . . IVSPLCG . T . SL . AAIGA . GAGITYLG . GPI . . . . .  
UniRef100\_UPI0012B35B19 . . . . . ET . YRALA LSNLIAIHQK . . . . . T . . . . . GIG . . . . . RLSAYCG . A . VS . AGAAA . GAGIAYLC . G . . . . .  
UniRef100\_UPI0012B366A0 . . . . . DL . YRALI FSNLISLYIK . . . . . D . . . . . KIG . . . . . KLSAYCG . V . VS . ASSAV . FSSIAFIK . G . . . . .  
UniRef100\_UPI0012B3DC24 . . . . . KL . IRAIF YGHIINKFVK . . . . . S . . . . . YVG . . . . . KLSALCG . CAIS . AGVGA . SAAITWMLG . GND . . . . .  
UniRef100\_UPI0012B3FC5E . . . . . EV . LRALA LSNLVAIHQK . . . . . K . . . . . YIG . . . . . PLSAYCG . A . VS . ASAGA . SAGIAYLM . G . . . . .  
UniRef100\_UPI0012B4284B . . . . . EM . IRLGV FADLVAIHLK . . . . . K . . . . . YIG . . . . . DLSAYCG . A . TC . AGCAA . VAGIAFIE . G . . . . .  
UniRef100\_UPI0012B42F45 . . . . . EL . CRATA LSYLICMYIK . . . . . E . . . . . YSG . . . . . RLSAFCG . CAIA . AGSGM . ACGLVFMNG . GGV . . . . .  
UniRef100\_UPI0012B4B74C . . . . . KL . YRALV VSNLVAIHQK . . . . . K . . . . . YIG . . . . . SLSAYCG . A . VS . AACGA . GAGITYLY . G . . . . .  
UniRef100\_UPI0012B59954 . . . . . TL . IRALA LSHMMAIYIH . . . . . S . . . . . KLP . . . . . NLSALCA . V . TT . ASMGA . AAGMTWLLT . KN . . . . .  
UniRef100\_UPI0012B59A5D . . . . . QL . YRALL LSNLMTLHEK . . . . . E . . . . . GIG . . . . . RLSAYCG . A . VS . AGAGA . GAGIAWLH . G . . . . .  
UniRef100\_UPI0012BA6B36 . . . . . SL . YRALI LSNLIAIYEK . . . . . F . . . . . WIG . . . . . KLSAYCG . V . VC . ASSGA . AAGITWLS . Q . . . . .  
UniRef100\_UPI0012BB2EF8 . . . . . LL . SRALA VAHYTNMYLR . . . . . A . . . . . YSG . . . . . KLSPLCG . A . VT . ATAGV . AAASWLLG . GSR . . . . .  
UniRef100\_UPI0012BB69D0 . . . . . RL . LRACA LSNLVAIYIK . . . . . S . . . . . KF G . . . . . VLSALCG . A . VV . ASTGV . ASAVWLRG . GGL . . . . .  
UniRef100\_UPI0012BB73BB . . . . . QL . IRALI LSHLSAIYIK . . . . . S . . . . . HLN . . . . . MLSALCG . A . TT . AAGS . SVAITWLLG . GN . . . . .  
UniRef100\_UPI0012BBCC85 . . . . . AL . VRAVT FSNMMAVYIK . . . . . A . . . . . KF G . . . . . RLSALCG . A . TC . AGMGV . ACGVWLRG . GGL . . . . .  
UniRef100\_UPI0012BC4B69 . . . . . VR . QRALA ITSVLAIYVK . . . . . A . . . . . HAG . . . . . RVSSYCG . CAIA . PGAGV . AAASVLEG . GDI . . . . .  
UniRef100\_UPI0012BD8E78 . . . . . LK . YRSLV FANLIGLYIK . . . . . Q . . . . . GIG . . . . . KLSAYCG . V . VS . AAAAS . VCGIAFAK . E . . . . .  
UniRef100\_UPI0012BD958B . . . . . RR . YRALA LANVLAIYIK . . . . . H . . . . . DIG . . . . . RLSAYCG . V . VS . AASAT . AAGIAYLT . D . . . . .  
UniRef100\_UPI0012C524A0 . . . . . KL . YRSLI FANLIGLYIK . . . . . E . . . . . GIG . . . . . ELSAFCG . V . VS . AAAAS . ICGISFMK . D . . . . .  
UniRef100\_UPI0012EE9FA7 . . . . . RM . LRALT LSNLIAIYIK . . . . . S . . . . . KF G . . . . . RLSALCG . A . TV . AATGA . ACGITYLMG . GDL . . . . .  
UniRef100\_V2Y2N1 . . . . . KL . YRALA LSNLTAIYHQK . . . . . S . . . . . FIG . . . . . TLSAYCG . A . VS . AGVGS . GAGIAYLQ . G . . . . .

|                         |        |   |     |      |      |     |   |   |   |     |   |   |   |        |        |        |     |      |      |      |     |     |   |   |     |      |     |     |     |     |     |     |     |     |     |     |     |     |   |     |   |     |     |     |     |     |     |     |     |
|-------------------------|--------|---|-----|------|------|-----|---|---|---|-----|---|---|---|--------|--------|--------|-----|------|------|------|-----|-----|---|---|-----|------|-----|-----|-----|-----|-----|-----|-----|-----|-----|-----|-----|-----|---|-----|---|-----|-----|-----|-----|-----|-----|-----|-----|
| UniRef100_V4JGF5        | .....T | L | ..L | KAIG | ..LS | H   | I | I | T | A   | Y | V | K | .....A | ...    | HT     | G   | .... | R    | L    | S   | A   | V | C | G   | ..CA | V   | A   | ..A | G   | A   | G   | A   | ..T | A   | G   | I   | T   | Y | L   | V | G   | ..G | N   | ..  |     |     |     |     |
| UniRef100_V6IYT6        | .....Q | L | ..Y | RAVC | ..LS | D   | L | V | T | I   | Y | Q | K | .....M | ...    | GI     | G   | .... | R    | L    | S   | A   | Y | C | G   | ..A  | V   | S   | ..A | G   | C   | G   | A   | ..G | A   | G   | I   | A   | Y | L   | N | ..G | ... |     |     |     |     |     |     |
| UniRef100_V7IAR5        | .....K | L | ..Y | RALI | ..V  | S   | N | L | M | A   | I | H | Q | K      | .....K | ...    | YI  | G    | .... | K    | L   | S   | A | F | C   | G    | ..V | V   | S   | ..A | S   | A   | A   | A   | ..G | S   | G   | V   | G | Y   | L | M   | ..D | ... |     |     |     |     |     |
| UniRef100_W1IUK4        | .....Q | L | ..A | RALI | ..L  | S   | H | L | M | A   | I | Y | I | H      | .....H | ...    | KL  | P    | .... | S    | L   | S   | A | L | C   | A    | ..A | T   | T   | ..A | S   | M   | G   | A   | ..A | A   | G   | I   | A | W   | L | I   | E   | ..E | H   | ... |     |     |     |
| UniRef100_W2BZQ9        | .....K | L | ..Y | RGLA | ..V  | S   | N | L | V | S   | I | Y | I | K      | .....K | ...    | KI  | G    | .... | S    | L   | S   | A | F | C   | G    | ..A | S   | S   | ..A | A   | A   | A   | S   | ..G | A   | G   | I   | A | F   | L | K   | ..G | ... |     |     |     |     |     |
| UniRef100_W8T7L5        | .....K | L | ..A | KALA | ..I  | S   | H | L | V | I   | A | Y | V | K      | .....N | ...    | YT  | G    | .... | R    | L   | S   | A | V | C   | G    | ..C | G   | V   | A   | ..A | S   | V   | G   | S   | ..T | A   | A   | I | A   | W | L   | M   | D   | ..L | G   | Y   | ... |     |
| UniRef100_X1EDB0        | .....R | L | ..I | RALA | ..L  | T   | N | L | I | T   | I | F | I | K      | .....S | ...    | YT  | G    | .... | A    | L   | S   | A | M | C   | G    | ..C | G   | V   | A   | ..A | G   | I   | G   | A   | ..S | A   | G   | V | V   | Y | L   | L   | G   | ..G | N   | ... |     |     |
| UniRef100_X6QCS0        | .....Q | L | ..A | RALM | ..L  | S   | H | L | M | A   | I | Y | I | H      | .....N | ...    | QL  | P    | .... | A    | L   | S   | A | L | C   | A    | ..A | T   | T   | ..A | A   | M   | G   | A   | ..A | A   | G   | I   | A | W   | L | L   | E   | ..A | R   | ... |     |     |     |
| UniRef100_A0A0J5P7T7    | .....R | L | ..I | RALF | ..L  | S   | H | T | I | A   | I | Y | I | H      | .....S | ...    | KL  | P    | .... | K    | L   | S   | A | L | C   | A    | ..V | T   | T   | ..A | A   | M   | G   | S   | ..A | A   | G   | M   | A | Y   | L | L   | N   | ..G | N   | ... |     |     |     |
| UniRef100_A0A2U8FHH0    | .....Q | Q | ..I | RALF | ..L  | S   | H | L | M | A   | I | Y | I | H      | .....S | ...    | KL  | P    | .... | K    | L   | S   | A | L | C   | A    | ..V | T   | T   | ..A | A   | M   | G   | S   | ..C | A   | G   | V   | A | W   | L | L   | T   | ..G | K   | ... |     |     |     |
| UniRef100_A0A448W3N0    | .....Q | L | ..I | RALF | ..L  | S   | H | T | I | A   | I | Y | I | H      | .....S | ...    | KL  | P    | .... | K    | L   | S   | A | L | C   | A    | ..V | T   | T   | ..A | A   | M   | G   | S   | ..A | S   | G   | M   | A | Y   | L | L   | G   | ..G | N   | ... |     |     |     |
| UniRef100_A0A3N4W6L3    | .....Q | L | ..I | RALF | ..L  | S   | H | T | I | A   | I | Y | I | H      | .....S | ...    | KL  | P    | .... | K    | L   | S   | A | L | C   | A    | ..V | T   | T   | ..A | A   | M   | G   | S   | ..A | A   | G   | M   | A | Y   | L | L   | N   | ..G | N   | ... |     |     |     |
| UniRef100_A0A3R8MG26    | .....Q | L | ..I | RALF | ..L  | S   | H | T | I | A   | I | Y | I | H      | .....S | ...    | KL  | P    | .... | K    | L   | S   | A | L | C   | A    | ..V | T   | T   | ..A | A   | M   | G   | S   | ..A | A   | G   | M   | A | Y   | L | L   | G   | ..G | D   | ... |     |     |     |
| UniRef100_UPI0004ED7B54 | .....Q | L | ..I | RALF | ..L  | S   | H | T | I | A   | I | Y | I | H      | .....S | ...    | KL  | P    | .... | K    | L   | S   | A | L | C   | A    | ..V | T   | T   | ..A | A   | M   | S   | S   | ..A | A   | G   | M   | A | Y   | L | L   | K   | ..G | N   | ... |     |     |     |
| UniRef100_A0A1C5QX57    | .....S | L | ..Y | RALV | ..F  | S   | N | L | L | T   | Y | Y | Q | K      | .....Y | ...    | YI  | G    | .... | K    | L   | S   | A | F | C   | G    | ..A | V   | S   | ..A | S   | C   | A   | A   | ..G | A   | A   | I   | T | Y   | M | V   | ..G | ... |     |     |     |     |     |
| UniRef100_A0A448W3N0    | .....S | L | ..Y | RALV | ..F  | S   | N | L | L | T   | Y | Y | Q | K      | .....Q | ...    | YI  | G    | .... | K    | L   | S   | A | F | C   | G    | ..A | V   | S   | ..A | S   | C   | A   | A   | ..G | A   | A   | I   | T | Y   | M | V   | ..G | ... |     |     |     |     |     |
| UniRef100_G6C136        | .....K | N | E   | V    | I    | E   | V | A | K | ..N | S | M | E | A      | T      | K      | N   | I    | I    | ..A  | ..A | ..T | K | G | ..R | A    | S   | ..Y | L   | G   | ..E | R   | S   | V   | ..G | H   | I   | D   | P | ..G | A | M   | S   | Y   | L   | ..G | ... |     |     |
| UniRef100_UPI0007B3E538 | .....R | L | ..A | RALM | ..L  | S   | H | L | S | A   | I | Y | I | H      | .....Y | ...    | QL  | P    | .... | R    | L   | S   | A | L | C   | A    | ..A | T   | T   | ..A | G   | M   | G   | A   | ..A | A   | G   | M   | A | Y   | L | L   | G   | ..G | D   | ... |     |     |     |
| UniRef100_A0A564VK10    | .....M | L | ..Y | RALI | ..F  | A   | N | L | V | S   | I | Y | I | K      | .....R | ...    | GI  | G    | .... | K    | L   | S   | A | Y | C   | G    | ..A | V   | N   | ..A | G   | C   | A   | A   | ..V | C   | G   | I   | A | Y   | L | D   | ..G | ... |     |     |     |     |     |
| UniRef100_A0A1F7RGL9    | .....L | L | ..A | EAIT | ..L  | A   | H | L | I | T   | A | Y | L | T      | .....S | ...    | YI  | G    | .... | V    | L   | S   | P | L | C   | G    | ..S | A   | A   | K   | G   | G   | I   | G   | A   | ..A | A   | G   | M | A   | Y | Y   | M   | G   | ..A | D   | E   | ... |     |
| UniRef100_A0A1F7S1R1    | .....L | L | ..S | EAIT | ..L  | A   | H | L | I | T   | A | Y | L | T      | .....A | ...    | HI  | G    | .... | L    | S   | P   | L | C | S   | ..S  | S   | A   | K   | G   | G   | I   | G   | A   | ..A | A   | G   | M   | A | Y   | Y | M   | G   | ..A | D   | E   | ... |     |     |
| UniRef100_A0A3M1RZ09    | .....L | L | ..A | ESLA | ..L  | G   | H | L | I | T   | A | Y | L | T      | .....E | ...    | FI  | G    | .... | I    | L   | S   | P | L | C   | G    | ..S | S   | A   | K   | G   | G   | I   | G   | A   | ..A | A   | G   | I | T   | R | I   | L   | G   | ..G | N   | D   | ... |     |
| UniRef100_A0A5C9EBK1    | .....K | L | ..V | EAI  | G    | ..L | T | H | L | L   | A | N | F | V      | S      | .....K | ... | YS   | G    | .... | N   | L   | S | A | L   | C    | G   | ..C | I   | I   | K   | ..A | G   | I   | G   | L   | ..A | A   | G | I   | T | Y   | L   | L   | ..E | P   | E   | K   | ... |
| UniRef100_A0A358LCV7    | .....K | I | ..I | RAVT | ..L  | S   | N | L | I | N   | I | Y | L | D      | .....Y | ...    | RS  | H    | ..E  | Y    | A   | ..H | L | S | P   | E    | C   | Y   | ..C | G   | S   | V   | ..A | P   | S   | A   | ..A | C   | G | V   | A | Y   | L   | R   | G   | ..G | S   | ... |     |
| UniRef100_A0A525D9V7    | .....E | I | ..M | RAVA | ..L  | S   | N | L | M | N   | I | Y | L | D      | .....Y | ...    | RS  | N    | ..E  | Y    | A   | ..H | L | S | P   | M    | C   | Y   | ..C | S   | G   | V   | ..A | P   | A   | A   | A   | ..A | S | G   | V | A   | F   | L   | H   | G   | ..A | G   | ... |
| UniRef100_R6ICA1        | .....D | G | ..Y | RAVA | ..F  | A   | L | L | M | N   | T | Y | M | K      | .....Y | ...    | LS  | K    | ..E  | Y    | V   | Y   | M | P | P   | T    | C   | ..S | C   | A   | T   | T   | ..S | A   | P   | A   | A   | ..A | A | G   | V | A   | F   | L   | H   | G   | ..L | T   | ... |
| UniRef100_UPI0009321914 | .....A | V | ..L | RAVA | ..F  | S   | N | L | V | N   | I | Y | L | D      | .....Y | ...    | KS  | N    | ..E  | Y    | A   | ..H | L | S | P   | M    | C   | Y   | ..C | A   | G   | V   | ..A | P   | A   | A   | G   | ..V | S | G   | V | A   | Y   | L   | H   | G   | ..H | N   | ... |
| UniRef100_UPI0009ABF8C2 | .....K | T | ..M | RAVA | ..F  | G   | Y | L | I | N   | V | F | L | K      | .....Y | ...    | NT  | K    | ..E  | L    | A   | Y   | M | G | P   | M    | C   | Y   | ..C | A   | S   | T   | ..A | S   | Q   | A   | A   | ..M | A | G   | V | A   | F   | L   | H   | N   | ..M | S   | ... |
| UniRef100_A0A0941IH7    | .....E | K | ..Q | KLIV | ..L  | S   | F | L | T | S   | V | Y | V | K      | .....Q | ...    | EM  | N    | ..I  | V    | T   | V   | L | C | G   | ..T  | G   | H   | A   | ..T | G   | C   | S   | A   | ..A | A   | V   | T   | A | Y   | I | O   | E   | ..G | T   | G   | ... |     |     |
| UniRef100_A0A2A1ZQZ3    | .....I | R | ..Q | KLVV | ..L  | S   | F | L | T | S   | V | Y | V | K      | .....Q | ...    | K   | M    | S    | ..I  | V   | T   | V | L | C   | G    | ..T | G   | H   | A   | ..T | G   | C   | S   | T   | ..A | A   | V   | T | A   | Y | I   | R   | K   | ..G | S   | V   | ... |     |
| UniRef100_A0A2N1PXM8    | .....M | K | ..K | KLIV | ..L  | S   | F | L | T | S   | V | Y | V | K      | .....Q | ...    | E   | M    | N    | ..V  | V   | T   | V | L | C   | G    | ..T | G   | H   | A   | ..T | G   | S   | S   | T   | ..A | A   | C   | Y | T   | Y | A   | K   | G   | ..G | T   | L   | ... |     |
| UniRef100_A0A318Y312    | .....E | R | ..Q | TAIC | ..L  | S   | V | L | T | A   | I | Y | L | K      | .....S | ...    | N   | M    | N    | ..R  | L   | T   | V | M | C   | G    | ..T | A   | V   | A   | ..G | A   | A   | ..A | A   | T   | A   | Y   | L | L   | G | ..G | G   | L   | ... |     |     |     |     |
| UniRef100_A0A369BEE9    | .....K | R | ..A | QAQC | ..L  | S   | M | M | T | A   | I | Y | I | K      | .....G | ...    | Q   | M    | N    | ..R  | L   | T   | V | M | C   | G    | ..T | A   | I   | A   | ..G | A   | A   | ..A | A   | T   | A   | Y   | L | M   | G | ..G | G   | C   | ... |     |     |     |     |
| UniRef100_A0A4R1RC12    | .....R | R | ..L | RALA | ..L  | S   | V | L | T | A   | I | Y | I | K      | .....S | ...    | F   | M    | D    | ..R  | T   | T   | V | M | C   | G    | ..T | A   | M   | A   | ..G | A   | A   | ..A | A   | Y   | L   | F   | G | ..G | D | R   | ... |     |     |     |     |     |     |
| UniRef100_A0A4U7JIT4    | .....E | R | ..Q | TAIC | ..I  | S   | I | L | T | S   | I | Y | I | K      | .....S | ...    | Q   | M    | N    | ..R  | L   | T   | V | M | C   | G    | ..T | A   | V   | A   | ..G | A   | A   | ..A | A   | I   | T   | Y   | L | L   | G | ..G | G   | L   | ... |     |     |     |     |
| UniRef100_S0FVB5        | .....E | R | ..E | RAIY | ..L  | S   | V | L | I | A   | A | Y | I | K      | .....S | ...    | Q   | M    | N    | ..R  | L   | T   | V | M | C   | G    | ..T | A   | V   | A   | ..G | A   | A   | ..A | A   | T   | A   | Y   | L | M   | G | ..G | G   | C   | ... |     |     |     |     |
| UniRef100_UPI0009DD728D | .....E | T | ..E | KLIV | ..L  | S   | F | L | T | S   | V | Y | V | K      | .....Q | ...    | E   | M    | N    | ..V  | V   | T   | V | L | C   | G    | ..T | G   | H   | A   | ..T | G   | C   | S   | S   | ..A | A   | V   | T | A   | Y | I   | K   | N   | ..G | T   | R   | ... |     |
| UniRef100_G5QO27        | .....R | L | ..A | RALS | ..A  | D   | D | E | R | L   | A | R | A | R      | ..A    | N      | V   | I    | A    | F    | E   | R   | Y | L | S   | P    | ..S | A   | S   | A   | F   | V   | G   | ..A | V   | R   | ..G | N   | Y | ..G | G | D   | G   | R   | G   | ..G | ... | G   | ... |
| UniRef100_A0A316DKY0    | .....I | I | ..S | KALI | ..L  | S   | C | L | I | T   | G | F | I | K      | .....H | ...    | K   | M    | G    | ..K  | L   | I   | P | L | C   | G    | ..V | F   | Y   | A   | ..A | G   | V   | ..G | A   | S   | V   | G   | L | Y   | F | L   | M   | N   | ..G | F   | ... |     |     |
| UniRef100_A0A432QVG1    | .....K | E | ..I | RAVL | ..M  | S   | V | L | L | T   | N | L | I | T      | .....S | ...    | R   | F    | G    | ..E  | V   | S   | S | V | C   | G    | ..A | Q   | Y   | A   | ..A | G   | A   | G   | V   | ..I | G   | G   | I | L   | Y | L   | ..K | E   | R   | ... |     |     |     |
| UniRef100_A0A5D0MJ87    | .....K | K | ..V | KSAI | ..L  | S   | C | F | I | A   | G | I | I | S      | .....E | ...    | K   | F    | G    | ..T  | V   | S   | S | I | C   | G    | ..C | V   | Y   | A   | ..A | V   | G   | V   | ..I | A   | G   | S   | L | Y   | L | ..E | N   | K   | ... |     |     |     |     |
| UniRef100_UPI00041EE289 | .....T | E | ..I | KAVL | ..V  | A   | V | L | L | T   | A | L | I | T      | .....S | ...    | R   | F    | G    | ..E  | V   | S   | S | V | C   | G    | ..A | Q   | Y   | A   | ..A | G   | A   | G   | I   | ..I | G   | G   | V | L   | Y | L   | ..R | D   | E   | ... |     |     |     |
| UniRef100_A0A1I4HXL9    | .....Q | L | ..A | RAIA | ..I  | S   | L | G | I | T   | I | Y | I | K      | .....V | ...    | R   | T    | D    | ..H  | L   | P   | T | L | Y   | G    | ..C | P   | V   | A   | ..A | V   | S   | G   | A   | ..S | A   | A   | I | T   | W | L   | R   | N   | ..G | D   | ... |     |     |
| UniRef100_A0A3M1SS97    | .....A | L | ..A | RALA | ..T  | S   | H | L | V | G   | S | Y | V | R      | .....S | ...    | F   | T    | G    | ..V  | L   | S   | P | L | C   | N    | ..A | V   | Q   | A   | ..A | S   | A   | G   | ..A | A   | G   | C   | V | R   | L | L   | G   | ..G | G   | ... |     |     |     |
| UniRef100_A0A097SS76    | .....V | F | ..V | RGLC | ..I  | A   | N | L | I | T   | W | K | V | K      | .....Y | ...    | A   | I    | G    | ..A  | L   | S   | S | M | C   | G    | ..S | V   |     |     |     |     |     |     |     |     |     |     |   |     |   |     |     |     |     |     |     |     |     |



|                                | 310                                                                     | 320 | 330 | 340 | 350           |
|--------------------------------|-------------------------------------------------------------------------|-----|-----|-----|---------------|
| 151906                         | ...                                                                     | ... | ... | ... | ...           |
| sp A6VH54 CYDE_METM7           | ...FDR TEE...S K SFTAN LP GIVCDGGKIG CALKTAS GVFAIYLSLF SK ...          | ... | ... | ... | ...VPYTN      |
| sp A4FW56 CYDE_METM5           | ...NLKK LNS...A ARAFTAN LP GIICDGGKVG CALKLAS GCFAYSSSLY VE ...         | ... | ... | ... | ...ISHEN      |
| tr A0A21LCBR0 A0A21LCBR0_METMI | ...NLKK LDS...S ARTFTAN LP GIICDGGKVG CALKLAS GCFAYSSSLY LD ...         | ... | ... | ... | ...ISYEN      |
| tr D5VSW9 D5VSW9_METIM         | ...FDR VDE...A VKTYSN L AGLVCDGGKTE CSLKIAS GVFSSYLAAN SC ...           | ... | ... | ... | ...VKGFG      |
| tr C7P8X1 C7P8X1_METFA         | ...TDK LEE...S K SFTAN LP GIVCDGGKIG CALKTAS GVFAIYLSLF SK ...          | ... | ... | ... | ...VPYTN      |
| tr F6BCV2 F6BCV2_METIK         | ...DTNK ITE...A VKSFTAN LP GIICDGGKIG CALKLAS GCFAYSSSLY AE ...         | ... | ... | ... | ...VPPNN      |
| tr C9RFZ5 C9RFZ5_METVM         | ...ENRI TEE...S K SFTAN LP GIVCDGGKIG CALKTAS GVFSIYLSLF SN ...         | ... | ... | ... | ...VPYNN      |
| tr H1KZQ8 H1KZQ8_9EURY         | ...NVDK ITE...A VKSFTGN LP GIICDGGKVG CALKLAS GCFAYSSSLY VE ...         | ... | ... | ... | ...IPSN       |
| tr N6VPY2 N6VPY2_9EURY         | ...D IEK...A MKSF LANIT GIICDGGKPS CSLKIAS GVFSAYLSLF YE ...            | ... | ... | ... | ...TKDY       |
| tr U5Q566 U5Q566_9BACT         | ...Y DOV CF...A K NM IGNIT GMVCDGAKVG CALKVAS GVSSAVQSAI LAME ...       | ... | ... | ... | ...G CISEND   |
| tr A0A2M7BGU7 A0A2M7BGU7_9DELT | ...V SO IEA...Q INN MV GAM GIICDGGKSG CAFKALMA VGLALDSSY LSME ...       | ... | ... | ... | ...N VRIPSGD  |
| tr A0A1C7HIT9 A0A1C7HIT9_9BURK | ...Y EEV CA...A K NM IAN L AGMLCDGAKP CSLKISS GVSTAMMSAL LAMN ...       | ... | ... | ... | ...E H CVTKLE |
| tr R5API9 R5API9_9BACT         | ...F EKV VA...A K NM IAN L TGMICDGA PS CAMKLAS GVSTAMMSAM MAME ...      | ... | ... | ... | ...G QSVQCQLE |
| tr R7RUE6 R7RUE6_9CLOT         | ...D KEFN...A T K NMV GDI TGMVCDGAKP CAIKLST AASAYKAAI LAVR ...         | ... | ... | ... | ...G VSVPCGN  |
| tr A0A250LQ15 A0A250LQ15_FUSVA | ...F S P A Q IDS...A T T LAT L SGVCDGAKPS CATKTAS GVAAFDGGY ASSK ...    | ... | ... | ... | ...N RKFEFGE  |
| tr U2LETO U2LETO_TRESO         | ...GD E D AVAR...A T T NT LAD VGGIVCDGAKP CAAKIAS AVDA LGLFE LGSH ...   | ... | ... | ... | ...EG VAFKSGE |
| tr A0A084JI14 A0A084JI14_9CLOT | ...L CA INK...A K NM IAN L AGMLCDGAKP CAIKLST AVGTSLCAA LALE ...        | ... | ... | ... | ...G VEVSSH   |
| tr A0A2G2ZHH3 A0A2G2ZHH3_9PROT | ...AS Y D TVAN...S S NN LGN VSGIICDGA KAS CATKIAT GLYAFDSSM LALN ...    | ... | ... | ... | ...Q KYLQDGE  |
| tr A0A1V5HI15 A0A1V5HI15_9BACT | ...Y A QVTF...A K NM IAN L TGMICDGA PS CALKTAS GVSTAMMSAL MAIE ...      | ... | ... | ... | ...N RVTSQLE  |
| tr A0A143XBT8 A0A143XBT8_9FIRM | ...D K O IGY...A K NM LSD VSGIICDGA KST CALKIAT NVHAAVQCAN LALS ...     | ... | ... | ... | ...D ISPNETQ  |
| tr U2BJC7 U2BJC7_9CLOT         | ...L G O IKR...A K NM IAN L VSGIICDGA KAS CALKIAT VSSAFQCSM LAIK ...    | ... | ... | ... | ...N YGAGEL   |
| tr X8IRIO X8IRIO_9FIRM         | ...D DMRR...A K NM LSD VSGIICDGA KST CALKIAT VSSAFQCSM LAIK ...         | ... | ... | ... | ...G CISENMH  |
| tr A0A1E3AMK7 A0A1E3AMK7_9FIRM | ...L K O IKN...A K NM IAN L VSGIICDGA KAS CALKIAT VSSAFQCSM LAIK ...    | ... | ... | ... | ...N H AGGLD  |
| tr A0A2T0B041 A0A2T0B041_9CLOT | ...I K O ICG...A K NM IAN L VSGIICDGA KST CALKIAT VSSAFQCSM LAIK ...    | ... | ... | ... | ...N H FVPSND |
| tr A0A173YXC3 A0A173YXC3_9CLOT | ...L E N IKR...A K NM LSD VSGIICDGA KST CALKIAT VSSAFQCSM LAIK ...      | ... | ... | ... | ...N H ISPSK  |
| tr A0A133XRP4 A0A133XRP4_9BACT | ...K L O ITY...A K NM VGNIT GMICDGA KPS CSMKVSS GVSSAMMSAL LAMK ...     | ... | ... | ... | ...N QVVTQLE  |
| tr I3YI50 I3YI50_ALIFI         | ...Y Q VAA...A K NM IAN L TGMICDGA KPS CSMKLTS GVSTAMMSAL MAMD ...      | ... | ... | ... | ...G H CVTPVE |
| tr A0A2V1IKY6 A0A2V1IKY6_9BACT | ...F A EVCA...A K NM IAN L TGMICDGA KPS CALKTSS GVSTAMMSAM LAMN ...     | ... | ... | ... | ...G KCVTSTE  |
| tr A0A0H5Q1R2 A0A0H5Q1R2_9ZZZZ | ...D E O IGN...A K NM LSD VSGIICDGA KST CALKIAT VSSAFQCSM LAIK ...      | ... | ... | ... | ...D VVLQST   |
| tr A0A1M6V4H0 A0A1M6V4H0_9FIRM | ...D E O IGH...A V RN MTGT TGMVCDGKVG CAMKVSI SSTAILCAL TAID ...        | ... | ... | ... | ...N SALRPD   |
| tr A0A1Y4TVT2 A0A1Y4TVT2_9FIRM | ...K E MAH...A K NM LSD VSGIICDGA KST CALKIAT VSSAFQCSM LAIK ...        | ... | ... | ... | ...G YIADVDH  |
| tr A0A0S6U6Q0 A0A0S6U6Q0_CLOBO | ...D D O IAN...A K NM LSD VSGIICDGA KST CALKIAT VSSAFQCSM LAIK ...      | ... | ... | ... | ...D VALQPSD  |
| tr A0A1Y4TNG6 A0A1Y4TNG6_9FIRM | ...D A Q MG...A K NM LSD VSGIICDGA KST CALKIAT VSSAFQCSM LAIK ...       | ... | ... | ... | ...G VUVNAT   |
| tr R9M2E2 R9M2E2_9FIRM         | ...D E O IGG...A K NM LSD VSGIICDGA KST CALKIAT VSSAFQCSM LAIK ...      | ... | ... | ... | ...N VVLQST   |
| tr A0A174KZB3 A0A174KZB3_9FIRM | ...D E O LGY...A V RN MTGT TGMVCDGKVG CAMKVSI SSTAILCAL TAID ...        | ... | ... | ... | ...D APLRVS   |
| tr R5BLB6 R5BLB6_9FIRM         | ...N E ELGY...A V RN MTGT TGMVCDGKVG CAMKVSI SSTAILCAL TAID ...         | ... | ... | ... | ...E APLRVS   |
| tr N2AVU5 N2AVU5_9CLOT         | ...D T Q IGN...A V RN MTGT TGMVCDGKVG CAMKVSI SSTAILCAL TAID ...        | ... | ... | ... | ...D VVLQST   |
| tr R6PEW0 R6PEW0_9CLOT         | ...K M EEE...A K NM LSD VSGIICDGA KST CALKIAT VSSAFQCSM LAIK ...        | ... | ... | ... | ...E V CVAHV  |
| tr V7I8Q4 V7I8Q4_9CLOT         | ...D D O IEG...A K NM LSD VSGIICDGA KST CALKIAT VSSAFQCSM LAIK ...      | ... | ... | ... | ...G VVISPTD  |
| tr R6STQ3 R6STQ3_9CLOT         | ...Q MMAK...A K NM LSD VSGIICDGA KST CALKIAT VSSAFQCSM LAIK ...         | ... | ... | ... | ...G FIDDIH   |
| tr A0A173QVX9 A0A173QVX9_9FIRM | ...H AMAR...A K NM LSD VSGIICDGA KST CALKIAT VSSAFQCSM LAIK ...         | ... | ... | ... | ...E FIDDIH   |
| tr A0A1C6J4L2 A0A1C6J4L2_9FIRM | ...D E O IGK...A K NM LSD VSGIICDGA KST CALKIAT VSSAFQCSM LAIK ...      | ... | ... | ... | ...D VVLQST   |
| tr R5IV32 R5IV32_9CLOT         | ...E T MEK...A K NM LSD VSGIICDGA KST CALKIAT VSSAFQCSM LAIK ...        | ... | ... | ... | ...D VYIYNAH  |
| tr U7UMR5 U7UMR5_9FIRM         | ...E E IAG...A K NM LSD VSGIICDGA KST CALKIAT VSSAFQCSM LAIK ...        | ... | ... | ... | ...G MSDKST   |
| tr COD015 COD015_9FIRM         | ...D MMAK...A K NM LSD VSGIICDGA KST CALKIAT VSSAFQCSM LAIK ...         | ... | ... | ... | ...G FIDNVH   |
| tr A0A1C5KLZ4 A0A1C5KLZ4_9CLOT | ...D MMAK...A K NM LSD VSGIICDGA KST CALKIAT VSSAFQCSM LAIK ...         | ... | ... | ... | ...G FIDNVH   |
| tr C5EER9 C5EER9_9FIRM         | ...A D L D E I H...A K NM LSD VSGIICDGA KST CALKIAT VSSAFQCSM LAIK ...  | ... | ... | ... | ...G QOFVGD   |
| tr A0A1Y4DID9 A0A1Y4DID9_9ACTN | ...G R A D E I H...A K NM LSD VSGIICDGA KST CALKIAT VSSAFQCSM LAIK ...  | ... | ... | ... | ...G QOFVGD   |
| tr E7GPD6 E7GPD6_CLOSY         | ...E E V LA...A K NM LSD VSGIICDGA KST CALKIAT VSSAFQCSM LAIK ...       | ... | ... | ... | ...G K CISPEH |
| tr L0F518 L0F518_DESGL         | ...P Q O IND...A K NM LSD VSGIICDGA KST CALKIAT VSSAFQCSM LAIK ...      | ... | ... | ... | ...G IRASNV   |
| tr A0A1Y4GDP2 A0A1Y4GDP2_9BACT | ...A D V LND...A K NM LSD VSGIICDGA KST CALKIAT VSSAFQCSM LAIK ...      | ... | ... | ... | ...G IATGPT   |
| tr M1P3B1 M1P3B1_DESSD         | ...L E L FDG...A K NM LSD VSGIICDGA KST CALKIAT VSSAFQCSM LAIK ...      | ... | ... | ... | ...G FLVSGR   |
| tr A0A2G6FF81 A0A2G6FF81_9DELT | ...M H L FEG...A K NM LSD VSGIICDGA KST CALKIAT VSSAFQCSM LAIK ...      | ... | ... | ... | ...G FIVSAR   |
| tr A0A2N1RFN9 A0A2N1RFN9_9SPIR | ...Y R M VQ...A K NM LSD VSGIICDGA KST CALKIAT VSSAFQCSM LAIK ...       | ... | ... | ... | ...G VVIDTE   |
| tr A0A2S5CD51 A0A2S5CD51_9ENTR | ...Y Q T LSM...A K NM LSD VSGIICDGA KST CALKIAT VSSAFQCSM LAIK ...      | ... | ... | ... | ...D SAVTGN   |
| tr R1HF92 R1HF92_9GAMM         | ...F E O ISH...A K NM LSD VSGIICDGA KST CALKIAT VSSAFQCSM LAIK ...      | ... | ... | ... | ...N LRVPQS   |
| tr R7JM93 R7JM93_9BACT         | ...A T O ITY...A K NM LSD VSGIICDGA KST CALKIAT VSSAFQCSM LAIK ...      | ... | ... | ... | ...N KVVTSQ   |
| tr A0A0J6CKL6 A0A0J6CKL6_9BACT | ...K K O ISY...A K NM LSD VSGIICDGA KST CALKIAT VSSAFQCSM LAIK ...      | ... | ... | ... | ...N KVVTPVE  |
| tr A0A1T5BYL2 A0A1T5BYL2_9BACT | ...K K L LSY...A K NM LSD VSGIICDGA KST CALKIAT VSSAFQCSM LAIK ...      | ... | ... | ... | ...N KVVTSQ   |
| tr A0A0P6X4H5 A0A0P6X4H5_9CHLR | ...E T M QO...A K NM LSD VSGIICDGA KST CALKIAT VSSAFQCSM LAIK ...       | ... | ... | ... | ...G YIAPDGN  |
| tr R6G801 R6G801_9BACE         | ...Y E O ITY...A K NM LSD VSGIICDGA KST CALKIAT VSSAFQCSM LAIK ...      | ... | ... | ... | ...N RCVTSVE  |
| tr A0A1M6WCW3 A0A1M6WCW3_PRERU | ...Y E E RI...A K NM LSD VSGIICDGA KST CALKIAT VSSAFQCSM LAIK ...       | ... | ... | ... | ...G K CVSPA  |
| tr A0A171AVJ8 A0A171AVJ8_9BACT | ...R E O IGY...A K NM LSD VSGIICDGA KST CALKIAT VSSAFQCSM LAIK ...      | ... | ... | ... | ...N KVVSAV   |
| tr K4LK2M K4LK2M_2THEPS        | ...E O IGY...A K NM LSD VSGIICDGA KST CALKIAT VSSAFQCSM LAIK ...        | ... | ... | ... | ...N VTRIPDS  |
| tr A0A1Y3UBV3 A0A1Y3UBV3_9FIRM | ...E A V VAA...A K NM LSD VSGIICDGA KST CALKIAT VSSAFQCSM LAIK ...      | ... | ... | ... | ...G TAIPHNF  |
| tr A0A1Q6GZB1 A0A1Q6GZB1_9BACE | ...F E O ISA...A K NM LSD VSGIICDGA KST CALKIAT VSSAFQCSM LAIK ...      | ... | ... | ... | ...N KCVTSVE  |
| tr A0A0H3J2Y7 A0A0H3J2Y7_CLOPA | ...E K H IKQ...A K NM LSD VSGIICDGA KST CALKIAT VSSAFQCSM LAIK ...      | ... | ... | ... | ...D ISITDK   |
| tr A0A1L4BUE7 A0A1L4BUE7_9GAMM | ...Q P L E K V NK...A K NM LSD VSGIICDGA KST CALKIAT VSSAFQCSM LAIK ... | ... | ... | ... | ...G NSVTAYD  |
| tr A0A1Q6FRE1 A0A1Q6FRE1_9BACT | ...Y E E IVM...A K NM LSD VSGIICDGA KST CALKIAT VSSAFQCSM LAIK ...      | ... | ... | ... | ...H RCVSE    |
| tr U2LL66 U2LL66_TRESO         | ...T M MSH...A K NM LSD VSGIICDGA KST CALKIAT VSSAFQCSM LAIK ...        | ... | ... | ... | ...D YIDDVH   |
| tr R5YX82 R5YX82_9BACE         | ...Y E E MTY...A K NM LSD VSGIICDGA KST CALKIAT VSSAFQCSM LAIK ...      | ... | ... | ... | ...H KCVTAVE  |
| tr A0A1W9VTS4 A0A1W9VTS4_9BACT | ...L H H FA...A K NM LSD VSGIICDGA KST CALKIAT VSSAFQCSM LAIK ...       | ... | ... | ... | ...E YVHVCE   |
| tr A0A1I7GWW5 A0A1I7GWW5_9PORP | ...Y D O ITF...A K NM LSD VSGIICDGA KST CALKIAT VSSAFQCSM LAIK ...      | ... | ... | ... | ...N RVVTPHE  |
| tr A0A1Q3Q9S5 A0A1Q3Q9S5_9BACT | ...Y E O VTF...A K NM LSD VSGIICDGA KST CALKIAT VSSAFQCSM LAIK ...      | ... | ... | ... | ...N RVVTSQ   |
| tr A0A2V1IY57 A0A2V1IY57_9BACT | ...Y R O ICH...A K NM LSD VSGIICDGA KST CALKIAT VSSAFQCSM LAIK ...      | ... | ... | ... | ...D TSVTSLE  |
| tr A0A2ION3P7 A0A2ION3P7_9CLOT | ...P K N R...A K NM LSD VSGIICDGA KST CALKIAT VSSAFQCSM LAIK ...        | ... | ... | ... | ...H RSFEPGD  |
| tr C3W9F7 C3W9F7_FUSMR         | ...E E ITN...A K NM LSD VSGIICDGA KST CALKIAT VSSAFQCSM LAIK ...        | ... | ... | ... | ...N YIFNVH   |
| tr A0A0R3JRW1 A0A0R3JRW1_9CLOT | ...Y E V E CK...A K NM LSD VSGIICDGA KST CALKIAT VSSAFQCSM LAIK ...     | ... | ... | ... | ...G VEVSKYD  |
| tr A0A1E9AGA9 A0A1E9AGA9_9FIRM | ...E D R D L KE...A K NM LSD VSGIICDGA KST CALKIAT VSSAFQCSM LAIK ...   | ... | ... | ... | ...G NSFKPGD  |
| tr A0A1U7M087 A0A1U7M087_9FIRM | ...E D R D L KE...A K NM LSD VSGIICDGA KST CALKIAT VSSAFQCSM LAIK ...   | ... | ... | ... | ...G NSFKSGD  |
| tr A0A1G7ZF40 A0A1G7ZF40_9BACT | ...Y E O IKN...A K NM LSD VSGIICDGA KST CALKIAT VSSAFQCSM LAIK ...      | ... | ... | ... | ...G TNIPCGN  |
| tr A0A1M7SRV0 A0A1M7SRV0_FERGO | ...H E O IKN...A K NM LSD VSGIICDGA KST CALKIAT VSSAFQCSM LAIK ...      | ... | ... | ... | ...D MNVP CGN |
| tr M5Q3B7 M5Q3B7_DESAF         | ...P R O AEA...A K NM LSD VSGIICDGA KST CALKIAT VSSAFQCSM LAIK ...      | ... | ... | ... | ...G AGISDRQ  |
| sp B8DLR0 Y1488_DESMV          | ...P R O AEA...A K NM LSD VSGIICDGA KST CALKIAT VSSAFQCSM LAIK ...      | ... | ... | ... | ...G PGMTGAE  |
| sp A1VGE6 Y2496_DESVV          | ...A V O AER...A K NM LSD VSGIICDGA KST CALKIAT VSSAFQCSM LAIK ...      | ... | ... | ... | ...D RGVQRP   |
| tr A0A101I220 A0A101I220_9BACT | ...P R O AEA...A K NM LSD VSGIICDGA KST CALKIAT VSSAFQCSM LAIK ...      | ... | ... | ... | ...G LKD PGDQ |
| tr A0A2V2G459 A0A2V2G459_9DELT | ...A E O AER...A K NM LSD VSGIICDGA KST CALKIAT VSSAFQCSM LAIK ...      | ... | ... | ... | ...G GVRDVQ   |
| tr A0A212JX75 A0A212JX75_9DELT | ...A D MAER...A K NM LSD VSGIICDGA KST CALKIAT VSSAFQCSM LAIK ...       | ... | ... | ... | ...N GGVCFEQ  |
| tr A0A2N1RYH9 A0A2N1RYH9_9SPIR | ...E E MH...A K NM LSD VSGIICDGA KST CALKIAT VSSAFQCSM LAIK ...         | ... | ... | ... | ...D TIDKLD   |
| tr C5EMR9 C5EMR9_9FIRM         | ...H Q Q MG...A K NM LSD VSGIICDGA KST CALKIAT VSSAFQCSM LAIK ...       | ... | ... | ... | ...G TVLQPTD  |
| tr A0A2T4TB47 A0A2T4TB47_9FIRM | ...K Q MEY...A K NM LSD VSGIICDGA KST CALKIAT VSSAFQCSM LAIK ...        | ... | ... | ... | ...G HIDKVDH  |
| tr A0A1Y4R8Q8 A0A1Y4R8Q8_9FIRM | ...A E MER...A K NM LSD VSGIICDGA KST CALKIAT VSSAFQCSM LAIK ...        | ... | ... | ... | ...G ISVDPVH  |
| tr A0A1C5T2Z6 A0A1C5T2Z6_9FIRM | ...A Q O TM...A K NM LSD VSGIICDGA KST CALKIAT VSSAFQCSM LAIK ...       | ... | ... | ... | ...N VCIDAIH  |
| tr A0A1F7AV49 A0A1F7AV49_9BACT | ...D M K L GH...A K NM LSD VSGIICDGA KST CALKIAT VSSAFQCSM LAIK ...     | ... | ... | ... | ...G FCISDSN  |
| tr A0A1V3L349 A0A1V3L349_9PAST | ...F E T ASM...A K NM LSD VSGIICDGA KST CALKIAT VSSAFQCSM LAIK ...      | ... | ... | ... | ...E THVTGNE  |
| tr A0A1C5V1H8 A0A1C5V1H8_9BACE | ...Y K O IVY...A K NM LSD VSGIICDGA KST CALKIAT VSSAFQCSM LAIK ...      | ... | ... | ... | ...E KCVTSVE  |
| tr U2P4S1 U2P4S1_9BACT         | ...Y T R V CH...A K NM LSD VSGIICDGA KST CALKIAT VSSAFQCSM LAIK ...     | ... | ... | ... | ...G KHVTAAE  |
| tr S0FA62 S0FA62_9BACE         | ...Y Q O V SF...A K NM LSD VSGIICDGA KST CALKIAT VSSAFQCSM LAIK ...     | ... | ... | ... | ...N KCVTSVE  |
| tr A0A255SNC9 A0A255SNC9_9BACT | ...Y Q H ICR...A K NM LSD VSGIICDGA KST CALKIAT VSSAFQCSM LAIK ...      | ... | ... | ... | ...G KCVSSAE  |
| tr F9D2C0 F9D2C0_PREDD         | ...Y T R V CH...A K NM LSD VSGIICDGA KST CALKIAT VSSAFQCSM LAIK ...     | ... | ... | ... | ...G EHVTAAE  |
| tr J9G1L2 J9G1L2_9ZZZZ         | ...Y E O ITF...A K NM LSD VSGIICDGA KST CALKIAT VSSAFQCSM LAIK ...      | ... | ... | ... | ...H KCVSSAE  |
| tr A0A1V6HXD6 A0A1V6HXD6_9BACT | ...K S Q ISS...A K NM LSD VSGIICDGA KST CALKIAT VSSAFQCSM LAIK ...      | ... | ... | ... | ...N KVVSHH   |

tr|W4PHR0|W4PHR0\_9BACE  
sp|Q2RIL2|Y1414\_MOOTA  
tr|E3DR40|E3DR40\_HALPG  
tr|C7RDJ2|C7RDJ2\_ANAPD  
tr|D7N8J7|D7N8J7\_9FIRM  
tr|AOA101I867|AOA101I867\_9BACT  
tr|T0T8V8|T0T8V8\_9FIRM  
tr|AOA101HQH0|AOA101HQH0\_9BACT  
tr|AOA1M6M0R3|AOA1M6M0R3\_9FIRM  
tr|R5PQF5|R5PQF5\_9BACT  
tr|AOA0S7X2P6|AOA0S7X2P6\_9BACT  
tr|K1Z1W5|K1Z1W5\_9ZZZZ  
tr|AOA2N2Z618|AOA2N2Z618\_9BACT  
tr|AOA1M3CYU2|AOA1M3CYU2\_9BACT  
tr|S6A8J2|S6A8J2\_9SPIO  
tr|AOA1M4U177|AOA1M4U177\_9CLOT  
tr|TOPGZ2|TOPGZ2\_9CLOT  
tr|AOA1Q6NM25|AOA1Q6NM25\_9FIRM  
tr|AOA2T3KA22|AOA2T3KA22\_9GAMM  
tr|AOA101VYN5|AOA101VYN5\_9FIRM  
tr|AOA1T5IDD0|AOA1T5IDD0\_9CLOT  
tr|AOA1M6NZ58|AOA1M6NZ58\_9FIRM  
tr|AOA223ASF7|AOA223ASF7\_9FIRM  
tr|AOA2S6G0N4|AOA2S6G0N4\_9CLOT  
tr|AOA1H5VMB4|AOA1H5VMB4\_9CLOT  
tr|S3AAC6|S3AAC6\_9FIRM  
tr|AOA176K076|AOA176K076\_9BACT  
tr|AOA1M5TZM1|AOA1M5TZM1\_9BACT  
tr|AOA1H3EAS1|AOA1H3EAS1\_9BACT  
tr|E5YB10|E5YB10\_BILWA  
sp|A6LLR7|Y1007\_THEM4  
tr|R6LUT7|R6LUT7\_9FIRM  
tr|F2LVU2|F2LVU2\_HIPMA  
tr|AOA2N1SJ95|AOA2N1SJ95\_9SPIR  
tr|AOA1V5Q3C6|AOA1V5Q3C6\_9BACT  
tr|W4UI14|W4UI14\_CUTAC  
tr|AOA2X5DYA3|AOA2X5DYA3\_SALET  
tr|AOA0C2NJF9|AOA0C2NJF9\_9VIBR  
tr|G2SCC0|G2SCC0\_ENTAL  
tr|AOA1G6LDY3|AOA1G6LDY3\_9ACTN  
tr|AOA1C6LB18|AOA1C6LB18\_9CLOT  
tr|AOA150AAJ3|AOA150AAJ3\_9BACT  
tr|C5UWG8|C5UWG8\_CLOBO  
tr|IOGPL4|IOGPL4\_SELR  
tr|FOYZI4|FOYZI4\_9CLOT  
tr|AOA0U5HF89|AOA0U5HF89\_9CLOT  
tr|AOA0G4K5Q4|AOA0G4K5Q4\_9SPIR  
tr|MLYXC3|MLYXC3\_9FIRM  
tr|AOA1Y4D3A3|AOA1Y4D3A3\_9BACT  
tr|T1DSV6|T1DSV6\_9PORP  
tr|R5K3Y4|R5K3Y4\_9BACE  
tr|AOA0A2FDZ8|AOA0A2FDZ8\_9PORP  
tr|AOA0E9LTM7|AOA0E9LTM7\_9BACT  
tr|AOA096CTK4|AOA096CTK4\_9BACT  
tr|AOA1T4LDG9|AOA1T4LDG9\_9PORP  
tr|U6RQI6|U6RQI6\_9BACE  
tr|AOA2T4TUJ1|AOA2T4TUJ1\_9BACT  
tr|AOA1V5EBL5|AOA1V5EBL5\_9DEL  
tr|AOA174ES44|AOA174ES44\_9BACT  
tr|R5PXC6|R5PXC6\_9BACT  
tr|E1GXV0|E1GXV0\_9BACT  
tr|R6Y5C6|R6Y5C6\_9BACT  
tr|AOA1H5SVZ9|AOA1H5SVZ9\_9BACT  
tr|AOA2U0U4Y1|AOA2U0U4Y1\_9BACT  
tr|D1W896|D1W896\_9BACT  
tr|E6MQP7|E6MQP7\_9BACT  
tr|E4T7H0|E4T7H0\_PALPW  
tr|AOA133YX9|AOA133YX9\_9BACT  
tr|AOA0D8JEE4|AOA0D8JEE4\_9BACT  
tr|W4UV02|W4UV02\_9BACE  
tr|AOA161RAB3|AOA161RAB3\_9FIRM  
tr|AOA255T3U3|AOA255T3U3\_9BACT  
tr|AOA1C5RAF1|AOA1C5RAF1\_9FIRM  
tr|D9Y8N5|D9Y8N5\_9BURK  
tr|AOA2N4S738|AOA2N4S738\_9BACT  
tr|AOA16PR96|AOA16PR96\_9PORP  
tr|R5JFT9|R5JFT9\_9BACE  
tr|J9C487|J9C487\_9ZZZZ  
tr|AOA1M3FU28|AOA1M3FU28\_9BACT  
tr|AOA2R3MQS7|AOA2R3MQS7\_9BACE  
tr|AOA2T5BZ72|AOA2T5BZ72\_9BACT  
tr|F5IYA2|F5IYA2\_9BACT  
tr|AOA2T5BXU0|AOA2T5BXU0\_9BACT  
tr|AOA1V5I3Q4|AOA1V5I3Q4\_9BACT  
tr|AOA1M3FLX8|AOA1M3FLX8\_9BACT  
tr|AOA1Y4HPA5|AOA1Y4HPA5\_9BACT  
tr|AOA1M3MC81|AOA1M3MC81\_9BACT  
tr|AOA1Q3KTB1|AOA1Q3KTB1\_9BACT  
tr|F7KI60|F7KI60\_9FIRM  
tr|C2CGI7|C2CGI7\_9FIRM  
tr|AOA1V5P9J8|AOA1V5P9J8\_9FIRM  
tr|AOA2S7ZD0J|AOA2S7ZD0J\_9FIRM  
tr|AOA1W1VEG8|AOA1W1VEG8\_PEPAS  
tr|G5IEG1|G5IEG1\_9CLOT  
tr|U7VFT7|U7VFT7\_FUSO  
tr|AOA2S4GQ19|AOA2S4GQ19\_9FIRM  
tr|R51577|R51577\_9BACT  
tr|AOA2M6ZWR1|AOA2M6ZWR1\_9CHLR  
tr|AOA1F0FV87|AOA1F0FV87\_9PORP  
tr|AOA2X1XJ55|AOA2X1XJ55\_PORCN  
tr|AOA1Q4P1Z1|AOA1Q4P1Z1\_SERMA  
tr|AOA2I4NZH5|AOA2I4NZH5\_CLOBO  
tr|R5SEH4|R5SEH4\_9BACE



tr|A0A1M5S8F6|A0A1M5S8F6\_9CLOT . . . . . EQIQG . . . SAQNLLANLTGMVCDGAKESCAMKLSTSAEGIMAAAYLALH . . . . D.VVVPNT  
tr|R7EVQ5|R7EVQ5\_9BACT . . . . . Y.DRI . . . . . AIKNMVANLTGMVCDGAKPSCAMKLSTSATSTAMMSAL.LAVN . . . . G.QCASAS  
tr|A0A2N5Z193|A0A2N5Z193\_9BACT . . . . . ERTGG . . . . . TIANLLADITGMVCDGAKESCSLKLTSTACGMAPLYST.LAIN . . . . G.CIVDEKN  
tr|A0A259UN51|A0A259UN51\_9FIRM . . . . . EMMAH . . . . . TLNNMASSITGMICDGGNQGCTMKGTAAVDAAYASVD.FAMK . . . . G.AYIFDVH  
tr|C3JB9P|C3JB9P\_POREA . . . . . R.EQIEF . . . . . SIKNMVGNITGMVCDGAKPSCSMKVSSSGVSTAMPSAL.LAME . . . . H.KVVTSS  
tr|C3WG74|C3WG74\_FUSMR . . . . . LS.L.KQIGY . . . . . AIEITTLTGSGVICDGAKESSCATKIASGISAAPFDAYY.AASK . . . . D.RKFEFE  
tr|A0A0U9HF52|A0A0U9HF52\_9THEO . . . . . EQIGF . . . . . TINNMADITGIICDGGNFGCSMKAVTAASTAILSAL.LALK . . . . N.THIPKDS  
tr|R5KGZ4|R5KGZ4\_9BACT . . . . . Y.EQMAF . . . . . AVKNMIANLTGMICDGAKESSCALKLTSTGVSTATLSAM.LAIQ . . . . N.KHVTSV  
tr|U2SF48|U2SF48\_9FIRM . . . . . EQIGF . . . . . AVNNMFGNVSGMLCDGAKADCALKISTTCVFAAFQCAA.MAIR . . . . S.ESVKAT  
tr|A0A1K1LIF7|A0A1K1LIF7\_9DELT . . . . . L.AVMER . . . . . TIRNMVGNVAGMICDGAKESSCALKVATAVGAGIQAVM.LALD . . . . G.SVVPGN  
tr|A0A134AK51|A0A134AK51\_9FIRM . . . . . ETMEY . . . . . VINNMASITGMICDGGNQGCTMKGTAAVSAAFDSCE.LALN . . . . G.VHINKVH  
tr|A0A0M1IUF1|A0A0M1IUF1\_9CLOT . . . . . KEIEN . . . . . TIKNMASITGIICDGGNSACSLKANTGVKAFLSAK.MALN . . . . N.IVIPNKC  
tr|C0C5L4|C0C5L4\_9FIRM . . . . . EQIAM . . . . . VIQNMASGLTGMICDGGNQGCSMKGIVAVDAAFRAAD.MAME . . . . N.VICDNIH  
tr|F3ZP77|F3ZP77\_9BACE . . . . . Y.KEVCY . . . . . SIQNMIANITGMLCDGAKPSCSLKVATGVSTAMLSAM.MAMD . . . . G.KYVTSAE  
tr|A0A098BXJ4|A0A098BXJ4\_9PORP . . . . . Y.NQITF . . . . . AAKNMIANITGMICDGAKESSCALKIASGVSTATLSAL.MAIE . . . . D.GVASPL  
tr|A0A1C7ID61|A0A1C7ID61\_9FIRM . . . . . L.WQVFF . . . . . AISNMIAVSGIICDGAKESSCALKIATVLTSAHYCAV.LAIQ . . . . G.RGASGL  
sp|C5CEY4|Y595\_KOSOT . . . . . T.EQISQ . . . . . AMSTVFSSTLGMICDGAKEACAYKVGFSGEVAYNSAM.LALD . . . . K.SCVAGP  
tr|B9DZB9|B9DZB9\_CLOK1 . . . . . L.ENIKY . . . . . AIKNMIGITSGMVCDGAKCGCALKVSTGVSAVQAAM.LALS . . . . N.VEISQND  
tr|A0A1W1XRL1|A0A1W1XRL1\_9CLOT . . . . . L.PNIKY . . . . . SIKNMIAVSGMVCDGAKCGCALKVSTGVSSAIQAAL.LALN . . . . D.VEVSOND  
tr|R5AJ55|R5AJ55\_9FIRM . . . . . .KEASA . . . . . ADMHMANLTGMICDGGSGSCALKASAGVVAAYLSAM.LAME . . . . G.TAIPNF  
tr|N1JU37|N1JU37\_9BACT . . . . . R.ETJIEQ . . . . . AMLTILSSITGMICDGAKESSCSLKAGLGQEAAYSCAL.LAMD . . . . N.IGVNSEQ  
tr|A0A0G2Z8T6|A0A0G2Z8T6\_9BACT . . . . . K.EQIIN . . . . . AAQTVLAGITGMVCDGAKESSCAFKAFFGGSIAFSSAL.LSLE . . . . G.RGVKSNQ  
tr|K2Q853|K2Q853\_9BACT . . . . . R.QQIKN . . . . . AINDTIGTLFGLTCDGAKRGCALKAVTGTLTALQVSE.LALN . . . . N.IDVPCGN  
tr|H2J3N8|H2J3N8\_MARPCK . . . . . R.DQIKN . . . . . AINNVLSTLFGTCDGAKRGCALKAGTGSFTALQSAQ.LALN . . . . N.TNIPCGN  
tr|A0A0H2ST44|A0A0H2ST44\_9BACT . . . . . K.TQIKN . . . . . AVNNVLSTLFGTCDGAKRGCALKAGTGTFTVALQSAK.LALE . . . . N.MNIPCGN  
tr|A0A1V6A0Z4|A0A1V6A0Z4\_9BACT . . . . . P.RQAEI . . . . . SVALLLSSLQGMVCDGAKGSCAIKVGTAAGAACTAAL.LVLQ . . . . G.FEDPGDQ  
tr|S7T1X0|S7T1X0\_9DELT . . . . . A.ROSES . . . . . AVAYVLAALMGVCDGAKFACSLKVATASAEAFDAAM.LAVH . . . . G.APLRTR  
tr|G7V7I3|G7V7I3\_THELD . . . . . Y.QQAAQ . . . . . AVGFLAASLGMICDGAKEACALKVSTTAAGEAYTSAL.LALK . . . . D.RSFPVAQ  
tr|A0A1F9QEB7|A0A1F9QEB7\_9BACT . . . . . D.DAKKTAL . . . . . AVNTVSDITGMICDGAKESSCALKVASSADSAITRAAW.MASN . . . . G.EGITDAE  
tr|A0A1F9T7I4|A0A1F9T7I4\_9BACT . . . . . .DLKKA . . . . . AVNTVISITGMICDGAKESSCALKVASSADSAITRAAW.MACN . . . . G.EGITDE  
tr|A0A1X7E8T6|A0A1X7E8T6\_9DELT . . . . . A.VQAEQ . . . . . ASSYVLSSVLGMICDGAKESSCALKVTAAGAEAFMGML.LATN . . . . G.SKFTSQ  
tr|S7U3L9|S7U3L9\_9DELT . . . . . A.AQAEQ . . . . . AVALVSSVLGMICDGAKESSCALKVTAAGAEAWGAHL.LALH . . . . G.PAMRGA  
sp|A7HMJ2|Y1278\_FERNB . . . . . A.EQIKN . . . . . AINNVLSTLFGTCDGAKRGCALKASIGTQAMLLNASK.LALK . . . . D.TNIPCGN  
tr|A0A1V5I1I1|A0A1V5I1I1\_9BACT . . . . . V.AKAAQ . . . . . AMLIILGNLGMVCDGAKRTCALKVGTGALEYHAAL.LVFD . . . . G.HYPEPQ  
tr|A0A1L7BFJ2|A0A1L7BFJ2\_9BACT . . . . . K.QQIKN . . . . . AINDTIGTLFGLTCDGAKRGCALKAITGTLTALQVSN.LALH . . . . N.IDVPCGN  
tr|A0A1E5HX95|A0A1E5HX95\_9FIRM . . . . . .DKIEK . . . . . AINNLI . . . . . SDTSGVICDGAKESSCALKSLTAELALRHFE.LVIE . . . . .  
tr|E2NRI0|E2NRI0\_CATMR . . . . . D.DQIGY . . . . . CIRNMSTVTGMICDGGKVGSCALKVSTGSTAALMCAT.TAVN . . . . N.AVLRES  
tr|I8RL19|I8RL19\_9FIRM . . . . . S.TMVAN . . . . . SMKNVFGNLAGMMGDDGKAEWGINLSIAAAVAVESSL.MAQH . . . . H.IAVPIHG  
tr|A0A2IOFCX5|A0A2IOFCX5\_9GAMM . . . . . Y.EQSCY . . . . . AIQNVLSDCSGMVCDGAKSTCAMKVSTSTSSAVTAFM.LAMN . . . . D.TQA.FDQ  
tr|U2CTP5|U2CTP5\_9CLOT . . . . . P.QQIND . . . . . MLCTCMH . . . . . MAGVVCDAKPSCAFRMFTSLFGCLEAMM.MAEK . . . . G.IRATNVE  
tr|A0A1Q6KJL3|A0A1Q6KJL3\_9FIRM . . . . . P.QQIND . . . . . MLCTAQVQ . . . . . MAGVVCDAKPSCATRMVVALFGSLQAMM.MAKE . . . . G.IRATNVE  
tr|A0A1V6JAV4|A0A1V6JAV4\_9BACT . . . . . .AEVRR . . . . . IFRDIPAQ . . . . . LAGLTCEGEPACGRKARQA . . . . .  
UniRef100\_A0A174CRQ0 . . . . . G.TL.DQINK . . . . . TVNTTLANISGIVCDGAKASCAAKIATSVDDASMMGHY.LAME . . . . D.QCYASNT  
UniRef100\_A0A174N3S7 . . . . . G.EL.SVIKK . . . . . TIENTLANIPGIICDGAKESSCAAKIAASLDAAFLAHH.LAMN . . . . G.QSYAPYT  
UniRef100\_A0A1H7BL91 . . . . . G.SL.EKINV . . . . . TIRNTLANVSGIICDGAKESSCAAKIASLDAAYMAHV.LAMS . . . . G.RNYQPGD  
UniRef100\_A0A1H8XEW4 . . . . . G.NL.ROINQ . . . . . TIHNMLANVPGIICDGAKESSCAAKIASLDAAYMAHT.LARR . . . . G.SQYQAGQ  
UniRef100\_A0A1M6HFE6 . . . . . GS.F.TNICN . . . . . TIINTLGNITSGIICDGAKESSCAAKVSSVDAAILGHS.MSKR . . . . G.RVFDSDG  
UniRef100\_A0A1S9CDU8 . . . . . G.TL.DQIKM . . . . . TIINTLANISGIVCDGAKSSCGAKIASLSDGAMMAHH.LAME . . . . N.KSYSPRT  
UniRef100\_A0A1V2LVJ5 . . . . . G.EV.EKINM . . . . . TIINTLANISGIVCDGAKASCAAKIASLSDGALMHGH.LAMA . . . . G.QCYCAYT  
UniRef100\_A0A1W2DLF5 . . . . . G.TL.EQINQ . . . . . TISNTLANVPGIICDGAKESSCAAKIASLSDASYMSHV.LAMN . . . . G.KHYQAGN  
UniRef100\_A0A2V3XXD9 . . . . . G.SY.EQICA . . . . . TIINTLANVSGMICDGAKESSCAAKIATVDAAIMAHCH.LSME . . . . A.EEFQPGD  
UniRef100\_A0A316LX84 . . . . . G.TY.EQICA . . . . . TIINTLANVSGIICDGAKESSCAAKIASVDAAILGHY.LAME . . . . Q.QEFNAGD  
UniRef100\_A0A353LWZ7 . . . . . G.DY.EQVSG . . . . . TIINSLANVAGILCDGAKPSCAAKIASVDAAIMALT.MSFG . . . . A.FRFADGD  
UniRef100\_A0A356BVF5 . . . . . G.DY.EEVCN . . . . . TIINTLANVSGILCDGAKPSCAAKIASVDAAIMGLT.MSFT . . . . A.LKFLDGD  
UniRef100\_A0A359AUT6 . . . . . Y.EQIKL . . . . . ASONTIANITGMICDGAKESSCALKLATGTSTAMLSAI.LAME . . . . N.RGVTPTE  
UniRef100\_A0A395YNH5 . . . . . G.SL.DRIKK . . . . . TIENTLANIPGIICDGAKESSCAAKIASLDAAFLAHH.LAMN . . . . D.QAYAPFT  
UniRef100\_A0A402BP96 . . . . . G.SL.EQINQ . . . . . TIINTLANVSGIICDGAKESSCAAKIASLSDASYLSHV.LAME . . . . G.KAYQAGN  
UniRef100\_A0A413LQ61 . . . . . G.SY.EQICA . . . . . VITNTLANVSGMICDGAKESSCAAKIATVDAAIMAYY.LSLE . . . . K.EEFQPGD  
UniRef100\_A0A416BC47 . . . . . A.DL.SVIKK . . . . . TIENTLANIPGIICDGAKESSCAAKIAASLDAAYLAHH.LAMN . . . . G.QSYAPYT  
UniRef100\_A0A5B9YBV7 . . . . . G.SM.EQIQK . . . . . TIVNTLANISGIIICDGAKESSCASKIASLDAAMMAHY.LAMQ . . . . N.KAYAPFT  
UniRef100\_G8QTP6 . . . . . G.TL.EQIEE . . . . . TIINTLANISGMLCDGAKPSCAAKIASAIDAILGHN.LAMK . . . . K.EYFANGD  
UniRef100\_L1Q747 . . . . . G.TL.EQINK . . . . . TIINTTLANISGIVCDGAKASCGAKIATSVDAAMMGHY.IAMA . . . . D.KAYDSNT  
UniRef100\_N9XUA2 . . . . . G.SL.EQISK . . . . . TVNTTLANISGIVCDGAKASCAAKIATSLDAAMMSHY.LAMA . . . . N.QAYNPLT  
UniRef100\_R6G079 . . . . . G.SL.EQINK . . . . . TIINTLANISGIVCDGAKASCAAKIATSLDAAMMSHS.LAMT . . . . N.RGYSANT  
UniRef100\_S3L3U3 . . . . . G.SY.ERICE . . . . . TIINTLAVVSGIICDGAKESSCAAKIASVDAAIMAHY.LAMK . . . . H.EAFQAGD  
UniRef100\_S3LBC8 . . . . . G.SY.EQVCA . . . . . TIINTLAVVSGIICDGAKESSCAAKIADVDAAIMAHY.LAMR . . . . N.RVFQPG  
UniRef100\_UPI0003123980 . . . . . G.NL.ROIEM . . . . . TIINTLAGITSGMICDGAKESSCASKIASALSCGVIAHQ.MALN . . . . N.TAFEDT  
UniRef100\_UPI00059A8ADD . . . . . G.TL.LQIDM . . . . . TIRNTLANIPGIICDGAKESSCAVKIATAIDAMMAHY.LAMK . . . . N.CAYNTCD  
UniRef100\_UPI0006D86209 . . . . . G.SL.TQIKN . . . . . TIINTLANISGIVCDGAKASCAASKITSLDAAIMAHH.LAMN . . . . D.RVYENG  
UniRef100\_UPI0006DC3002 . . . . . G.SL.EQINK . . . . . TVNTTLANISGIVCDGAKASCAAKIATSLDAAMMAHY.LAMS . . . . D.QSYRANT  
UniRef100\_UPI000930BB27 . . . . . ES.K.ELVEE . . . . . TILNSLAVNSGILCDGAKASCAAKIASLRNAPMSLD.QAKR . . . . G.QSFKSGD  
UniRef100\_UPI00007D41A5 . . . . . G.SM.DRIKK . . . . . TIENTLANIPGIICDGAKESSCAAKIASLDAFLAHH.LAMN . . . . D.QAYAPFT  
UniRef100\_UPI0010671517 . . . . . AD.A.DVLGM . . . . . IITNTQGNVSGIICDGAKESSCAAKISSIEAGLMGYE.MAKR . . . . G.CVFRPGE  
UniRef100\_UPI0012B2C99E . . . . . G.SE.KEIDD . . . . . TIVNTLATITSGMICDGAKESSCAGKIAVAVNAAYIAHE.MAMR . . . . N.RVYHSGE  
UniRef100\_A0A017RVN8 . . . . . E.EKEFN . . . . . TISNMVGDVTGMICDGAKESSCAIKLSTAGAAALKAAL.LAMN . . . . G.SVFPFDN  
UniRef100\_A0A034T1R7 . . . . . Y.EAVAM . . . . . AIGSMIGDVSGMICDGAKESSCAMKVSTAGAAFKAVL.MALD . . . . D.SAFVSFG  
UniRef100\_A0A037Z1V7 . . . . . I.QQICG . . . . . AIKNMIAVSGMICDGAKESSCAYKLCISVSSAIDATK.MALD . . . . N.IFVPSGD  
UniRef100\_A0A064DLW3 . . . . . Y.NTIAM . . . . . AISSMIGDVSGMICDGAKESSCAMKVSTASAAWKAVL.MALD . . . . D.TAVTGN  
UniRef100\_A0A069RM78 . . . . . .DQVEG . . . . . AINNMIANLSGMVCDGAKAGCAYKLSAAAAAMQSAI.NVKY . . . . G.SIVPKLN  
UniRef100\_A0A073ITX9 . . . . . F.QQICT . . . . . AMSLLANIAMFCDGAKESCALKVGSAAGAAEYHAAK.WALR . . . . G.QKLAVPQ  
UniRef100\_A0A075KFF0 . . . . . F.KAVSM . . . . . AISNMIGDVAGLICDGAKESSCAMKVSTVMSGYKAVL.MALE . . . . G.IRVTEEN  
UniRef100\_A0A076LH42 . . . . . ADRIEE . . . . . SIKSFTANLPGIICDGGKIGCALKIASGVFAIYLSLF.SK . . . . . VPYNT  
UniRef100\_A0A081BZ02 . . . . . Y.HEISA . . . . . TIANMVGNLSGVICDGAKESSCALKVSSAVQAAGQSAL.LAMO . . . . G.MRVSKNE  
UniRef100\_A0A081C875 . . . . . DMKEIAL . . . . . AINNLI . . . . . SDLGMVCDGAKAGCALKVSTSTDSATRAAY.MALN . . . . N.HGITSLE  
UniRef100\_A0A085ABB7 . . . . . Y.ETLAM . . . . . AIGSMIGDVSGMICDGAKESSCAMKVSTASSAWKAVL.MALD . . . . D.TAVTGN  
UniRef100\_A0A085HE69 . . . . . Y.QTISM . . . . . AIGSMIGDVSGMICDGAKESSCAMKVSTVSSAWKAVL.MALD . . . . D.TAVTGN  
UniRef100\_A0A086YYH2 . . . . . Y.DTAA . . . . . AINNMAAGAMVCDGAGCSCAMKVATASSMYRSVN.LALQ . . . . G.VEIPSSN  
UniRef100\_A0A089Q193 . . . . . Y.RSMTM . . . . . AISSMIGDVSGMICDGAKESSCAMKVSTVSSAWKAVL.MALD . . . . N.TAVTGN  
UniRef100\_A0A090JPN8 . . . . . ES.K.EVIEE . . . . . TILNSLAVNSGIIICDGAKESSCAMKIASIRNGFLAYD.QAKT . . . . K.NSFHSGD  
UniRef100\_A0A094JMB3 . . . . . Y.QQISF . . . . . AVSSMIGDVAGVICDGAKESSCAMKVSSAAGAAKSSSL.MAID . . . . N.ICTVTGE  
UniRef100\_A0A096AJM6 . . . . . ES.R.DVVAQ . . . . . TILNSALAGITSGVICDGAKESSCAMKIALALNNALFLGRH.QAKT . . . . D.NSFHTGD  
UniRef100\_A0A096KMZ8 . . . . . GT.R.EQIGA . . . . . TVSNTLGNVSGIICDGAKESSCAAKISALVDAAILGHD.MAM . . . . QG.RGFRAGE  
UniRef100\_A0A098F5F2 . . . . . S.QLKA . . . . . AIQNTIGNVSGMICDGAKESSCAMKVSTCSNVAVQSAL.LALN . . . . N.QEIQSTD  
UniRef100\_A0A0A2E6A5 . . . . . K.EQSGY . . . . . AVKNMIGNVSGMICDGAKESSCSLKASTISSALISAL.LAME . . . . Q.EVVTGL  
UniRef100\_A0A0A2Y2Q1 . . . . . F.DTAA . . . . . AISSMIGDVSGMLCDGAKESSCAMKVSTSVTSAYKSVL.MAINT . . . . Q.TGVTGDE  
UniRef100\_A0A0A3AP03 . . . . . F.ETVSM . . . . . GICSMIGDVSGIICDGAKESSCAMKVSTSVSSGYKSVL.MALD . . . . N.THVTGAE  
UniRef100\_A0A0B0BT87 . . . . . Y.EEVSY . . . . . AVKNMIANLAGMICDGAKESSCALKVASGISTSVLSAM.LAME . . . . H.RCVTAAE  
UniRef100\_A0A0B7MG27 . . . . . KEIITA . . . . . AVNNLAGNLSGMVCDGGKPGCALKVSTCASEAVLAAF.LSLE . . . . G.VEIEKSD  
UniRef100\_A0A0C1U077 . . . . . L.DNVSY . . . . . TIKNMIGDVSGMICDGAKESSCALKLTAVGAAVKSAL.LSTR . . . . G.VEIESEK  
UniRef100\_A0A0D2HQ4 . . . . . E.QQIAG . . . . . AIKNITEDLAGVICDGAKESSCALKIATAGNAVKSAL.FSLQ . . . . G.VNMVATD  
UniRef100\_A0A0D8IFV9 . . . . . QQIEG . . . . . VIKNILGDVSGMVCDGAKESSCALKISTASAAITQAAL.LAID . . . . N.HIFAPGN  
UniRef100\_A0A0E2E9E9 . . . . . G.SY.EQVCG . . . . . TIVNTLGTVSGIICDGAKESSCAAKIASLSDAALFSGE.LAMD . . . . G.NFFAGGD  
UniRef100\_A0A0F0C990 . . . . . AD.L.DGIIH . . . . . TLVNALAISGVVCDGAKASCAGKIALAVDNGILGYE.MYQE . . . . G.QQFVGGD



UniRef100\_A0A0F2JPH4 . . . . . AEIKA . . . AIQNMQGN T TGMFC DGA K TG CAMKLST CTSAAVQSAI MAIE . . . . G.KIQPTD  
UniRef100\_A0A0F5PPY6 . . . . . R.KOIKG . . . AVSNMLAG LSGMICDGA K TG CAYKLSTI VTAAL EASK. FAME . . . . N.IFIPSDN  
UniRef100\_A0A0G0R539 . . . . . L.EAVTC . . . AIQNL TAMIAGMLCDGA S EG CAAKV VVA DAAILWAGC. AAGY . . . . G.DNLSGGAA  
UniRef100\_A0A0G1DYA4 . . . . . DLKLI TY . . . AIDNVAND LGFMFCNGANLG CAVKVAS SAHSAI SAAF. SAID . . . . G.YHASGPN  
UniRef100\_A0A0G4JSG9 . . . . . Y.EFVAM . . . AIGSMIGD VSGMICDGA S NS CSMKVST SVSAAYKAVL. MALD . . . . N.SAVTGN E  
UniRef100\_A0A0H2QFG3 . . . . . Y.EVVMAM . . . AISSMIGD VSGMICDGA S NS CAMKVST SVSAAYKAVL. MALD . . . . N.S.CVRS G D  
UniRef100\_A0A0H3H4Y6 . . . . . Y.LQ TINT . . . AIINMISD ITGMICDGA S NS CAMKVST SVVSSAFKAVL. MAMQ . . . . N.SCAGSN D  
UniRef100\_A0A0J1G0F0 . . . . . Y.QQM QY . . . AVNSMVAD ISGVVCDGA K PG CALK IATAT VTS A I RAAN. MAIS . . . . G.TGADSH D  
UniRef100\_A0A0J1G1X4 . . . . . YA.SF.SVIED . . . TITNTLAAV SGVICDGA K PS CAAKIAAG VQAGMLGYE. MAKD . . . . G.CRFREG E  
UniRef100\_A0A0J1H5D8 . . . . . F.NHISN . . . AICSMIGD ITGIICDGA K TS CAMKVST SVASA AIKAAL. MALD . . . . G.IRVTGN E  
UniRef100\_A0A0J1JII6 . . . . . F.DQISS . . . AICSMIGD ITGIICDGA K TS CAMKVST SVASA AIKAAL. MALD . . . . G.IRVTGS E  
UniRef100\_A0A0J5FUC8 . . . . . Y.QPVAM . . . AICSMIGD ISGMICDGA S NS CAMKVST SVSAAYKAVL. MALD . . . . N.SCVSGS D  
UniRef100\_A0A0J5W6F6 . . . . . .HOIKA . . . AIQNTIGNV SGMICDGA K AG CAMKVST CSNVAVQSAL. LAIN . . . . D.QBIKST D  
UniRef100\_A0A0J8V6C6 . . . . . F.AHISA . . . AICNMIGD ITGIICDGA K TS CAMKVST SVASA AIKAAM. MALD . . . . G.IRVTGE E  
UniRef100\_A0A0J8VFK9 . . . . . F.AQSCF . . . AIQNVLS DTTGMVCDGA K AT CAMKVST SVSSQA AVKSM L. LAMN . . . . N.HAAAMQ .  
UniRef100\_A0A0J8Y0Z6 . . . . . F.AQSCF . . . AIQNVLS DTTGMVCDGA K AT CAMKVST SVSSQA AVKSM L. LAMN . . . . N.HAANKQ .  
UniRef100\_A0A0L0AS64 . . . . . Y.DTIAI . . . AITGNMIGD ISGMICDGA S NS CAMKVST SVSAAWKAVL. MALD . . . . N.TAVSGN D  
UniRef100\_A0A0L6Z6T5 . . . . . DG.Y.DEIAH . . . TVVNAAI VSGVICDGA K PS CAAKIAAA V DAGIMGYH. MYKE . . . . G.QEFKGG D  
UniRef100\_A0A0M0T7J5 . . . . . Y.QPVAM . . . AICSMIGD ISGMICDGA S NS CAMKVST SVSAAYKAVL. MALD . . . . N.SVVTGS D  
UniRef100\_A0A0M3F2I2 . . . . . Y.QTAMM . . . AIGSMIGD VSGIICDGA S NS CAMKVST SVSSAAWKAVM. MALE . . . . E.SAVTGN E  
UniRef100\_A0A0N8IRU1 . . . . . F.QTISY . . . AVSNMISD ISGIICDGA S NS CAMKVST TATACAFKSVL. MAQQ . . . . N.SVAGER D  
UniRef100\_A0A0P8WD60 . . . . . GG.E.KEISQ . . . TITNTLANV SGVICDGA K PS CAAKIAS VDAAILLACY. MTMQ . . . . G.RGFQSG E  
UniRef100\_A0A0P9CI45 . . . . . Y.QQSCY . . . AIQNVLGDC TGMICDGA K ST CAMKVST STSSA IYSAM. LAIN . . . . A.TGTMDQ .  
UniRef100\_A0A0Q3VF08 . . . . . QQVKA . . . AVQNTIGNV SGMICDGA K AG CAMKVST CSNVAVQSAL. LAIN . . . . H.QEISST D  
UniRef100\_A0A0Q4B7W8 . . . . . E.KEVEA . . . TIKNMLGS V TGMLCDGA K VGG CALKVSSG VSTAVTSAL. LAME . . . . G.SCISAN D  
UniRef100\_A0A0Q9M0K2 . . . . . .NEIKA . . . AIQNM LGNVTGM MCDGA K GGG CAMKVAT CTSAAVQSAL. LASK . . . . G.MTISSTN  
UniRef100\_A0A0Q9SDW4 . . . . . .TEIKA . . . AIQNM LGNVTGM MCDGA K GGG CAMKVAT CTSAAVQSAL. LASK . . . . G.MTISSTN  
UniRef100\_A0A0R1J2S2 . . . . . Y.NVAVS . . . TITNMMDA AVGMVCDGA G CCS CAMKVAS SVSSMYRSMN. LAIQ . . . . G.VSIPANN  
UniRef100\_A0A0R1KCR0 . . . . . Y.EOACS . . . AITKNMIGD AAGMVCDGA G CCS CAMKVAT STSSM CRAVD. LAIQ . . . . G.VSIPANN  
UniRef100\_A0A0R1QCJ6 . . . . . Y.QA AAA . . . AITKNMCDGV VGMVCDGA G CCS CAMKVAN SAATMCRAVK. LAIA . . . . G.VVIPATN  
UniRef100\_A0A0R1QVN7 . . . . . Y.QTAMK . . . AVNNMAGDA AAGMVCDGA G CCS CAMKVAT SVSSMLRSVN. LAIQ . . . . G.VVIPASN  
UniRef100\_A0A0R1RS54 . . . . . Y.DTACM . . . AITKNMAGDA PGMICDGA G CCS CAMKVAT SVSSMYRSMN. LAIQ . . . . G.VVIPATN  
UniRef100\_A0A0R1WE98 . . . . . I.DDASR . . . AITKNMVD AAGMICDGA G CCS CAIKVAT SIQTMFKAVN. LAMQ . . . . G.VTIPGTN  
UniRef100\_A0A0R1XN77 . . . . . I.EVAGR . . . AITKNMIGD AAGMVCDGA G CCS CAIKVAT SVQTMFKAVN. LAIQ . . . . G.VTIPGTN  
UniRef100\_A0A0S7YTK7 . . . . . V.HHIA G . . . AITKNLIED LAGVICDGA K AG CSLKLATA AGATVQAAL. FSIO . . . . G.VEQOPT D  
UniRef100\_A0A0T9SYJ6 . . . . . Y.LTVSY . . . AITNMISD ISGIICDGA S NS CAMKVST TATACAFKSVV. MAQQ . . . . H.SVAGEY D  
UniRef100\_A0A0U1P249 . . . . . .TEVEA . . . AVQNTIGNV TGMICDGA K AG CAMKVST CSNVAVQSAL. LAMN . . . . N.KKIQST D  
UniRef100\_A0A0U9HKX7 . . . . . L.EQIEG . . . SIKNMIGT MAGIICDGGKPG CAFKLAIS VDAAL E SAL. MALN . . . . G.VVISPD D  
UniRef100\_A0A0V8QFY1 . . . . . GG.Y.EEV I H . . . TVVNALAI VSGVICDGA K AS CAAKIAAA V DAGILGYN. MYIR . . . . G.QQFYEG D  
UniRef100\_A0A0W1JFM7 . . . . . GG.Y.DEIAH . . . TIVNAAI VSGVICDGA K PS CAGKIAAA V DAGILGYL. MYKE . . . . G.QQFRGG D  
UniRef100\_A0A0W7U3I6 . . . . . GG.Y.EQISH . . . CITNMIGD VSGIICDGA G SA CSMKVST STSAAVKSSL. LAIN . . . . N.LRVTQS E  
UniRef100\_A0A0X8V7S8 . . . . . .TEVSN . . . AITNHMAAN LTGMICDGGSIG CSLKASAG VYSAFLSAM. LAMN . . . . H.TAIPQYL  
UniRef100\_A0A101WFD3 . . . . . GG.M.KEISQ . . . TITNTLANV SGVICDGA K PS CAAKIAS VDAAILLGCY. MTMQ . . . . G.RGFSSG E  
UniRef100\_A0A101WKD0 . . . . . .SQIEG . . . AITNMIGNL SGMICDGA K AG CAYKLAS AGA AIQSAI. AAKY . . . . G.SVIPYKN  
UniRef100\_A0A110A741 . . . . . .NQISG . . . AVQNMGGVAGMFC DGA K GGG CSLKLSV CAGEAVYSAM. LAMD . . . . D.SIIQAT D  
UniRef100\_A0A124F8X5 . . . . . .NLNTSL . . . AITNMISD ITGMLCDGA K GGG CALKVAT ADSA I RAAY. MAIN . . . . G.YGIEYD D  
UniRef100\_A0A124IG43 . . . . . DQIAG . . . AITKNIVGN LCGMICDGA K AS CAFKLS TASTESILAAE. LAIK . . . . N.VIAETD  
UniRef100\_A0A132HQ55 . . . . . EP.L.STIEH . . . TLENALGMAAG IVC DGA K PS CAGKIALS VEAGILGYE. MSKO . . . . G.CNLLGG D  
UniRef100\_A0A132HZ15 . . . . . Y.AQISY . . . AVKNLINTIAGMVC DGA K PS CALKMAS GLYAFVA AE. LACH . . . . N.HVVEET D  
UniRef100\_A0A133N2T7 . . . . . KD.L.DLIEK . . . TISNALMIAS GMICDGA K AS CAAKIATAVDAGISGY. LAKN . . . . N.RNFEAG D  
UniRef100\_A0A133NA22 . . . . . GS.Y.YNVC D . . . AITNTLGNL SGVICDGA K AS CALKISSGVYS AFDA CM. LAIN . . . . K.DVLRPE D  
UniRef100\_A0A133PQ02 . . . . . ED.R.NITKA . . . TITNALATNS GLICDGA K ES CAIKIAS LKMGFLAYK. QAKE . . . . G.NSFKAG D  
UniRef100\_A0A133QF24 . . . . . F.NNICY . . . AVKNMIANLTGMICDGA K PS CSLKISSGVSTAVLSAM. LSM E . . . . G.RHVTAE E  
UniRef100\_A0A133SJD7 . . . . . T.PY.QTICR . . . ATASMNGG IVMVC DGA K ADS CSMKVAS AVEIAYRSVM. MAIA . . . . G.IRVEGT D  
UniRef100\_A0A134A7V5 . . . . . GS.F.AQFEA . . . TIVNTLANV GGVICDGA K PS CAAKIASA AVDAAILGCD. MAL . . . . AD.DNFLAG D  
UniRef100\_A0A134AE04 . . . . . DD.K.EIIEK . . . TLSNALAVNG GILCDGA K AS CAMKIAS LNRNGFLAYD. QAVA . . . . G.RSFHAN D  
UniRef100\_A0A134B344 . . . . . K.EQSIG . . . AVKNMIGNV SGMICDGA K PS CSLKASTGVSSA ILSAM. LSMQ . . . . G.HVVTAT E  
UniRef100\_A0A136WEN1 . . . . . EOVSG . . . AVQNLMMGGVAGMFC DGA K GGG CSLKLSI CAGEAVYSAM. FAMD . . . . D.SIIQAT D  
UniRef100\_A0A136W147 . . . . . ACINK . . . AITNTIVNIFGVVCDGARLA CALKIASAAGIATECSI. LAVE . . . . G.VETPLN E  
UniRef100\_A0A136W1AI . . . . . AEVSH . . . AMNHMAANLTGMICDGGSIG CSLKASAG VYSAFLSAM. LAMN . . . . E.TAIPNDF  
UniRef100\_A0A137SV0P . . . . . KP.L.ETIKE . . . TISNALAVNS GLICDGA K AS CAMKIAS LNRNGLAYR. QALN . . . . N.NSFHSG D  
UniRef100\_A0A140L3I8 . . . . . EQIDG . . . VIKNMIANI SGMICDGA K VGG CALKLATAASTAIQSAI. LAIN . . . . N.KIVPSKN  
UniRef100\_A0A143WXQ4 . . . . . G.GY.EEAVH . . . AVVNALSI TAGMVC DGA K PS CAGKIAFA VNAGILGYV. MYRD . . . . G.QQFYGG D  
UniRef100\_A0A143XS55 . . . . . Y.DEAAA . . . AVKNMVATLTGM LCDGA K PS CAMKLMSGVSTAVLSAM. MAME . . . . H.RCVTAV E  
UniRef100\_A0A150FRN2 . . . . . RKIEG . . . CIDNMVANL SGMICDGA K AG CALKLAS AAGAVQSAL. MAKY . . . . N.CIVPPLN  
UniRef100\_A0A151B5Y3 . . . . . C.TOAKY . . . AITKNMGNVAGMICDGA K IG CALKVSTCTSAAVQSAL. LAIN . . . . D.VISEKE E  
UniRef100\_A0A154BWC5 . . . . . M.GOIHG . . . AITKNMVANLTGMICDGGKVG CALKLATAAGVCVETAM. LTLK . . . . N.VIVPNSN  
UniRef100\_A0A160IJG9 . . . . . .VKMKA . . . AIQNTLGNV SGMVC DGA K AG CAMKVAT CSAAVQS AV. LASN . . . . G.LCIPSTN  
UniRef100\_A0A162SKD8 . . . . . GD.Y.KETIAH . . . TIVNAAI VSGVICDGA K PS CAGKIAAA V DAGILGY. MYKE . . . . G.QQFRGG D  
UniRef100\_A0A163SFG2 . . . . . .DKMKA . . . AIQNTLGNV SGMVC DGA K AG CAMKVAT CSAAVQS AI. LASN . . . . G.LCIPSTN  
UniRef100\_A0A165STA7 . . . . . Y.QQISH . . . CITNMIGD VSGIICDGA G SA CSMKVST STSAAVKSSL. MAIN . . . . N.LHV PQS E  
UniRef100\_A0A173SRV1 . . . . . G.GY.EEV I H . . . TVVNALAI VSGMVC DGA K AS CAAKIAS V DAGILGYN. MYIR . . . . G.QQFYAG D  
UniRef100\_A0A173VH50 . . . . . .EKHTK . . . VIGNMASGLTGMICDGGNHG CTMKGIVAVDAAFRATD. MAMD . . . . D.ICIENIH  
UniRef100\_A0A173XRW8 . . . . . G.TL.EQIEN . . . TITNTLANIAG IVC DGA K AS CAAKIAS L DAAIMGHY. LAMR . . . . G.VAFDEK C  
UniRef100\_A0A173YG33 . . . . . GT.Y.EDVSL . . . TIVNTIGNV GGVICDGA K PS CAAKIASA VDAAILAHY. MGQ . . . . H.RSFQPG E  
UniRef100\_A0A174D2T3 . . . . . GT.L.EQIEN . . . TVVNTIADAGG IVC DGA K PS CAAKISTALQAAILSHK. MAM . . . . R.RGFARG E  
UniRef100\_A0A174L3Z4 . . . . . G.GY.KETIT . . . TVVNALAI VSGMVC DGA K AS CAAKIAAS V DAGILGYH. MYMQ . . . . G.QQFYGG D  
UniRef100\_A0A174MR10 . . . . . V.PMVEA . . . AITKNVADL SGMICDGA K PG CSLKLATAAGTAVQSAM. LAIK . . . . G.ISATDR D  
UniRef100\_A0A174RFL9 . . . . . GD.L.DDVSM . . . TITNTIANV GGVICDGA K PS CAAKIASA VDAAYMAHC. MTE . . . . NS.KTFRAG E  
UniRef100\_A0A174SLI3 . . . . . L.TNIKH . . . AVNNMISD IAGMICDGA K ST CALKIATATAAALQCAT. LAMN . . . . N.ISPSSKN  
UniRef100\_A0A176U761 . . . . . GG.I.DEVAH . . . TLVNSIAITSG IICDGA K PS CAAKIASA V DAGILGYE. MYRH . . . . G.QQFYGE D  
UniRef100\_A0A178K336 . . . . . F.SHISA . . . AITCNMIGD ITGIICDGA K TS CAMKVST SVASA AIKAAM. MALD . . . . G.IRVTGN E  
UniRef100\_A0A191HT73 . . . . . EAVKY . . . AVQNM LGNVTGMVCDGA K AG CALKVSTCTNAAVQAAL. LAVE . . . . G.LSVHST E  
UniRef100\_A0A194AJJ9 . . . . . GG.Y.EETIAH . . . TVVNALAI VSGIICDGA K PS CAGKIAAA V DAGILGY. MYOH . . . . G.QQFYGE D  
UniRef100\_A0A198FLW8 . . . . . Y.EPMA M . . . AISSMIGD ISGVICDGA S NS CAMKVST GSAAAYKAVL. MAID . . . . N.CVTGND  
UniRef100\_A0A1A7NS13 . . . . . F.ETAAM . . . AISSMIGD ISGMLCDGA NS CAMKVST SVTSA YKSVL. MAMN . . . . Q.TGVTGD E  
UniRef100\_A0A1A7P382 . . . . . F.ETAAM . . . AISSMIGD ISGMLCDGA NS CAMKVST SVTSA YKSVL. MAMN . . . . Q.TCVTGD E  
UniRef100\_A0A1A9FGK8 . . . . . Y.QAIA M . . . AISSMIGD VSGMICDGA S NS CAMKVST SVSSAAWKAVM. MALE . . . . N.TAVTGE E  
UniRef100\_A0A1A9SF16 . . . . . F.ETAAM . . . GICSMIGD ISGIICDGA S NS CAMKVST SVASGYK SIL. MAMD . . . . D.TRVTGN E  
UniRef100\_A0A1B1FZ18 . . . . . GN.V.KDIQN . . . AITNTLGNV SGVICDGA K AS CATKIASG IYSAFDGAM. LAQM . . . . G.SVLSCD D  
UniRef100\_A0A1B1Z1U9 . . . . . .NKIKA . . . AITNTLGNV SGMVC DGA K AG CAMKVAT CSAAVQS AI. LAIQ . . . . G.LCIPSTN  
UniRef100\_A0A1B2I1I3 . . . . . Y.DOICT . . . AMSLLAN IAGMLCDGA K ES CALKVGAATAEAYYAME. WAIM . . . . G.QRLAVP Q  
UniRef100\_A0A1B3FFN2 . . . . . Y.DTIAK . . . AIGSMIGD VSGMICDGA S NS CAMKVST SVSSAAWKAVL. MALD . . . . D.TAVTGN E  
UniRef100\_A0A1B3WQ23 . . . . . E.SD.EP IKN . . . EVINCLAITSG IVC DGA K PS CAAKIAIS IDGAYLAID. MTRN . . . . R.QRFAGG D  
UniRef100\_A0A1B6BB21 . . . . . EQLGS . . . TIKNMLANTSGMICDGA K VGG CSLKLATAQAAYQSAI. LSTA . . . . D.TCVPTFN  
UniRef100\_A0A1B7HHI8 . . . . . Y.KSISM . . . AITNMIGD VSGMICDGA S NS CAMKVST SVASA AWKAVL. MALD . . . . N.TSVSGN E  
UniRef100\_A0A1B7XD54 . . . . . L.EETIER . . . TIKNMVGT IAGMICDGA K TS CALKVAS VEEAATSSAL. LAMK . . . . G.TSVPGS D  
UniRef100\_A0A1B7XGB6 . . . . . Y.EETIER . . . TIKNMVGSVAGMICDGA K TS CALKVAS VEEAATSSAL. LAMK . . . . G.VSVSGN E  
UniRef100\_A0A1B9JTJ9 . . . . . Y.EPVD M . . . AICSMIGD LSGIICDGA S NS CAMKVST SVSSAYKAVL. MAIS . . . . C.IRVTKG E  
UniRef100\_A0A1B9K484 . . . . . Y.EPIDM . . . AICSMIGD LSGIICDGA S NS CAMKVST SVSSAFKAVL. MAIS . . . . H.IRVTGN E  
UniRef100\_A0A1B9KFW9 . . . . . Y.EPIDM . . . AICSMIGD LSGIICDGA S NS CAMKVST SVASGFAVL. MAIN . . . . R.IRVTGK E  
UniRef100\_A0A1B9KTG7 . . . . . Y.EPVD M . . . AICNMIGD LSGIICDGA S NS CAMKVST SVSSAFKAVL. MAIN . . . . H.IRVTGN E  
UniRef100\_A0A1B9LJ45 . . . . . Y.EPIDM . . . AICSMIGD LSGIICDGA S NS CAMKVST SVSSGFAVL. MAL S . . . . H.IRVTGN E

UniRef100\_A0A1C0A496 . . . . . Y . EPVDM . . . AI C NMVGDLSGIICDGNSSCAMKVSTVSSSGFKAVL. MALN . . . R . IRVTGN E  
UniRef100\_A0A1C1A396 . . . . . T E I K S . . . A I Q N M L G N V T G M M C D G A K G G C A M K V A T C T S A A V Q S A L . L A S K . . . . G . M S I S S T N  
UniRef100\_A0A1C4GIU9 . . . . . Y . S T I S M . . . A I S S M I G D V S G M I C D G A K S S C A M K V S T S A S A W K A V L . M A I D . . . . N . T A V T G N E  
UniRef100\_A0A1C5L1P3 . . . . . G G . Y . R E D I I H . . . T V V N A V A I V S G M V C D G A K A S C A A K I A S V D A G I L G Y Y . M Y K N . . . . G . Q O F F G G D  
UniRef100\_A0A1C5PCW1 . . . . . G S . Y . E A V S R . . T I V N T V A N V G G I V C D G A K A S C A A K I A S A V D A A I L A H S . L S M . . . . K G . R T F H P E V  
UniRef100\_A0A1C5W129 . . . . . V V A M E R . . . V V A N M A A S I T G M I C D G G N Q G C T M K G V T A V D T A F R S V R . F A I S . . . . G . V G V D P V H  
UniRef100\_A0A1C5W9L6 . . . . . S O I E G . . . A I E N M V A N L S G M I C D G A K A G C A L K I A S A S A A V Q S A I . I A K Q . . . . G . C Y V P P M N  
UniRef100\_A0A1C5ZT91 . . . . . G E I A C . . . A I S N V L G N V A G M L C D G A K A S C A L K I S T C T N A A M L A A T . L A M R . . . . H . L R V A S N E  
UniRef100\_A0A1C6BRP6 . . . . . E Q I A M . . . V I R N M A S G L T G M I C D G G N Q G C A M K G I V A V D A A F R A V D . M A Q N . . . . G . V C I D S I H  
UniRef100\_A0A1C6C657 . . . . . G . D Y . E E I I H . . T I V N A L A I V S G I V C D G A K A S C A A K I A F A V D A G I M G Y D . M Y R N . . . . G . Q O F F G G D  
UniRef100\_A0A1C6CG70 . . . . . E S . F . E V I C K . . T V I N S V G T I G M I C D G A K P S C A S K I R S A V D T A I M S Y M . L A K . . . . D G . F A F A H G E  
UniRef100\_A0A1C6CHU6 . . . . . G G . V . E E I G A . . V V T N T L A N V A G I V C D G A K A S C A A K I A S V E A A I M A I N . L T F G . . . . G . R T F S P G E  
UniRef100\_A0A1C6E2C8 . . . . . G D . Y . S Q V S A . . A I I N T L G N V G G I I C D G A K P S C A A K I A S V N A A I M A F H . L S M . . . . E N . K S F L P G D  
UniRef100\_A0A1C6FZ07 . . . . . L . V H V E N . . . A I R N M V A D I S G L I C D G A K Y G C A L K I A T S V S S A F R C A A . L A V H . . . . N . V T A S G N D  
UniRef100\_A0A1C6GTU2 . . . . . G T . Y . D C I V H . . T I V N A L A I A S G M V C D G A K A S C A A K I A T A V E A G I L G F E . M Y Q Q . . . . G . Q O F F Y N G E  
UniRef100\_A0A1C6HE15 . . . . . G G . Y . E E I I A H . . T I V N A L A V S G V C D G A K A S C A A K I A A A V D A G I L G Y W . M Y R D . . . . G . N Q F F G G D  
UniRef100\_A0A1C6KK02 . . . . . G G . Y . S H I C H . . T I V N A L A I T S G I V C D G A K P S C A A K I A A S V D A G I L G Y E . M Y R N . . . . G . Q O F F Y G G D  
UniRef100\_A0A1C7FR01 . . . . . D . K O I G A . . . A I I N M S A N L T G M I C D G G K I G C A L K I A T A A S A A I M S A Y . L A V G . . . . G . V V V S P S D  
UniRef100\_A0A1C7FR29 . . . . . A D . Y . D A I A H . . T I I N A V A I L S G T I C D G A K P S C A A K I A A S V D A G I L G Y Q . M Y L S . . . . G . R N F Q G G D  
UniRef100\_A0A1C7GSP5 . . . . . G S . F . T A V A H . . T I V N A V A I S G T I C D G A K P S C A A K I A A S V D A G I L G Y H . M Y K A . . . . S . Q E F K S G D  
UniRef100\_A0A1C7GTK2 . . . . . G G . Y . E A I A H . . T I V N A V A I S G T I C D G A K P S C A A K I A A S V D A G I L G Y S . M Y K N . . . . H . Q E F K S G D  
UniRef100\_A0A1C7I701 . . . . . Y . A Q M T W . . A V N S M V A D I S G V V C D G A K P G C A L K I A T A V Q S A V R A A N . M A I N . . . . G . S G A D S H D  
UniRef100\_A0A1C7I949 . . . . . G . T L . D Q I K M . . T V E N T L A N I P G I I C D G A K I S C A A K I A T S L D A A I M A H N . L A M K . . . . N . K V Y A P Y T  
UniRef100\_A0A1D7XJ79 . . . . . G D . D . K I V S H . . T V V N A L A I V S G I I C D G A K S C A A K I A T A V D A G I L G Y N . M Y L N . . . . G . Q O F Y S G D  
UniRef100\_A0A1D8GD74 . . . . . . . . . . E K I N G . . T I K N M V A N I A G M V C D G A K V G C A L K I A T A A A T A I Q S A L . L A M Q . . . . C . V I P P A K N  
UniRef100\_A0A1D9BEG4 . . . . . Y . D A V A M . . . A I C S M V G D I A G I I C D G A S N S C A M K V S T S G T A A Y K A V L . M A I D . . . . D . T R V T G F E  
UniRef100\_A0A1D9FM70 . . . . . . . . . . E E M E K . . S I N N V M G N I A G M F C D G A K A G C S L K V A T G I F V A I I S A H . K A L E . . . . G . N S I K G T D  
UniRef100\_A0A1E3AN94 . . . . . G G . Y . E E I S R . . T I V N T I A N I G M I C D G A K S S C A A K I A S A V D A A I M A H F . L E N . . . . E D . H G F L P G E  
UniRef100\_A0A1E3AP59 . . . . . G . G Y . E E I V H . . T I V N T L A N V S G I V C D G A K A S C A A K I A S A V D A G I L G F Y . M Y R N . . . . G . Q E F V D G D  
UniRef100\_A0A1E3AX25 . . . . . G R . L . D E V S H . . T I V N S T A I V S G I V C D G A K P S C A G K I A S V D A G I L G Y S . M F Q E . . . . G . Q O F Y A E D  
UniRef100\_A0A1E3JUL5 . . . . . L . K N V Y A . . S W R T M T A D I S G M I C D G A K P G C A L K I A T S V N A A A R A A Q . L A I N . . . . G . I G A T Q Q D  
UniRef100\_A0A1E3UYE5 . . . . . Y . F . E Q S C F . . A I Q N V I S D S S G M V C D G A K A S C A M K V S T S S S A A V R S F L . M A I N . . . . S . Q N V S Q Q D  
UniRef100\_A0A1E4LLH0 . . . . . E R . Y . D A I S H . . T I V N A L A I L A G M V C D G A K P S C A G K I A A A V D A G I L M G Y E . M Y K N . . . . G . Q O F Y D G D  
UniRef100\_A0A1E5DC87 . . . . . F . E Q S C F . . A I Q N V I S D S S G M I C D G A K S S C A M K V C T S S S T A V R S F M . M A M N . . . . N . S S V Q G Q .  
UniRef100\_A0A1E7GP88 . . . . . V . G H M E G . . . A I K N I M H D L A G V I C D G A K A G C A I K I N T A A G A A V Q A A L . F S I Q . . . . G . I N V Q D T D  
UniRef100\_A0A1E7GUS9 . . . . . D M E K I T L . . A V N N L I S D L G M L C D G A K G A C A L K V V S T S D S A I R S A Y . M A I H . . . . N . H G I T E M E  
UniRef100\_A0A1E8VY78 . . . . . C T . F . D O Y G A . . T V V N T L A N V G G I V C D G A K P S C A A K V S A A V D A A V L A G D . M A F . . . . A D . K S F K A G D  
UniRef100\_A0A1F7FM76 . . . . . L . E I A T A . . A V N N M V G S I T G I I C D G A K V G C A I K I L I C A V D S A F Q A A M . M A M R . . . . G . L K L P T T N  
UniRef100\_A0A1F8U1J0 . . . . . . . . . . K O I E G . . A I L N M I G N L S G M I C D G A K A G C A Y K I L A S A A G A A I Q S A L . Y V K Y . . . . G . S V I P S L N  
UniRef100\_A0A1F9AZ30 . . . . . F . R Q L E W . . A I Q N V I G D I T G I I C D G A K Q G C S L K I S T A A E S A I R A A L . M A M E . . . . G . I N I P A G E  
UniRef100\_A0A1F9KWT1 . . . . . G R . F . E Q V A H . . T I V N A L A I V S G I I C D G A K P S C A A K I A F S V E A G I L G F F . M Y Q K . . . . G . K O F Y G G D  
UniRef100\_A0A1F9NH53 . . . . . . . . . . V . H H M E G . . A I K N I L E D L A G V I C D G A K A G C A I K I N T A A G A A V Q A A L . F S L H . . . . G . V N V K D T D  
UniRef100\_A0A1F9QJ51 . . . . . . . . . . N S K K A A L . A V N T V I S D I G M L C D G A K S G C A L K V A S S A D S A I R A A W . M A S N . . . . G . E G I T E A E  
UniRef100\_A0A1F9QNF5 . . . . . . . . . . D L K A A G R . A V N T V I S D I G M L C D G A K S G C A L K V A S S A D S A I R A A Y . M A V N . . . . G . E G I T E L E  
UniRef100\_A0A1F9RH62 . . . . . . . . . . D A R K T A L . A V N T V I S D I G M L C D G A K S G C A L K V A S S A D S A I R A A W . M A S N . . . . G . E G I T D E  
UniRef100\_A0A1F9S618 . . . . . . . . . . D V R G I S L . A I N N V I S D I G M L C D G A K S G C A L K V V S T D T A I R S A Y . M G I H . . . . H . Y G I T E V E  
UniRef100\_A0A1F9SG49 . . . . . . . . . . D A R K T A L . A V N T V I S D I G M L C D G A K S G C A L K V A S S A D S A I R A A W . M A S N . . . . G . E G I T D E  
UniRef100\_A0A1F9TAK5 . . . . . . . . . . D V K K T A L . A V N T V I S D I G M I C D G A K S G C A L K V A S S A D S A I R A A W . M A C N . . . . G . E G I T E E  
UniRef100\_A0A1F9WBA0 . . . . . . . . . . D L K K T A L . A V N T V I S D I G M L C D G A K S G C A L K V A S S A D S A I R A A Y . M A I N . . . . G . E G I T E L E  
UniRef100\_A0A1F9XU28 . . . . . . . . . . N L K A A A L . A V N T V I S D I G M L C D G A K S G C A L K V A S S A D S A I R A A Y . M A V N . . . . G . E G I T D Q E  
UniRef100\_A0A1G3Y0Y6 . . . . . G D . F . D A I S K . . T I T N T L A N V G G I V C D G A K P S C A A K I A S A V D A A I M A H Y . L S A . . . . E G . M A F L D G E  
UniRef100\_A0A1G5G075 . . . . . . . . . . S H I E G . . V I K N V L G D I S G M V C D G A K V G C A L K I S T S V S S A I Q A A L . L A I D . . . . N . Q V I P A G N  
UniRef100\_A0A1G5RWL5 . . . . . . . . . . E T V E S . A V V N M I A N L S G M V C D G A K L G C A L K I A T A A S T A V E T A A . L A Q D . . . . G . R T V P A G N  
UniRef100\_A0A1G7TJU5 . . . . . Y . E R C C R . . S V K N M I A N L T G M I C D G A K P S C S L K I T S G V S T A I L S A L . L S M E . . . . G . K C V T S E E  
UniRef100\_A0A1G7ZR90 . . . . . Q . R T V S M . . A I C S M I G D L A G M I C D G A S N S C A M K V S T S A S S A Y K A V L . M A I D . . . . N . S R V A H Y E  
UniRef100\_A0A1G9HCH6 . . . . . E Q I Q G . . A C N N M F A N I S G M I C D G A K D T C S L K I C T S A E E A V L S A L . L A I N . . . . G . T I V H P N I  
UniRef100\_A0A1G9IX78 . . . . . Q . Q I A G . . T I K N M V G S I S G M V C D G A K G G C A F K I A T A S E A T I Q A Q . L A V N . . . . D . V I I G D L E  
UniRef100\_A0A1G9V926 . . . . . E T . L . E V I E H . . T I L I N A I G D V G G I V C D G A K A S C A A K I A S A V D A G I L G Y E . M A K . . . . R N . R C F P F G E  
UniRef100\_A0A1G9WAQ0 . . . . . Y . D T A A R . . A L S S M T G D V T G M V C D G A A N S C A M K V G S A S G S A F R S V M . L A I D . . . . G . K R V S G N E  
UniRef100\_A0A1G9YI22 . . . . . L . A Q I K H . . G I Q N T I A S L S G M I C D G A K S T C A L K I S T S T N A A I Q A A T . L A M N . . . . N . T A P T T K D  
UniRef100\_A0A1G9ZQB5 . . . . . . . . . . D M D K I Y L . A I N N L I S D L G M L C D G A K N G C A F K V A S S A D S S I R A A Y . M A I N . . . . N . N G I T Y S D  
UniRef100\_A0A1H0QX52 . . . . . V . H H M E G . . A I K N I L E D L A G V I C D G A K A G C A L K I N T A A G A A V Q A A L . F S L H . . . . G . I N V K D T D  
UniRef100\_A0A1H0YFU9 . . . . . F . E Q S C Y . A I N L V L A D L S G M L C D G A K A S C A L K V A S S A T S A H K A A N . I A M K . . . . S . N T S I N M  
UniRef100\_A0A1H2XK87 . . . . . R O I G G . . A C N N V L A N L T G I I C D G A K D T C A L K I S T S V E E A I L S A F . L A I E . . . . D . V I R P N I  
UniRef100\_A0A1H3EXX2 . . . . . S E I K G . . A I Q N M L G N V T G M M C D G A K G G C A M K V A T C T S A A V Q S A L . L A S K . . . . G . M T I S S T N  
UniRef100\_A0A1H3LER9 . . . . . V . N I S Y . . A I K N M V G N I S G M I C D G A K I G C A L K V S T G A S A A V Q S A L . L A I D . . . . G . I E V S H M E  
UniRef100\_A0A1H3WA76 . . . . . . . . . . N V E O I T L . A V N N L I S D L G M L C D G A K G G C A L K V V S T S D S A I R S A Y . M A I N . . . . D . H G I T S I E  
UniRef100\_A0A1H3Y3B2 . . . . . G D . Y . A H I A K . . T I T N T I A N V G G I V C D G A K P S C A A K I A S V H A A I L A H Y . M S M . . . . N D . K S F Q P G E  
UniRef100\_A0A1H4BKZ7 . . . . . Y . N R I C A . . S V K N M V A N L T G M I C D G A K P S C S L K I T S G V S T A I L S A L . L A M E . . . . G . K C V T S S E  
UniRef100\_A0A1H8B655 . . . . . G G . Y . N E I S K . . T I V N T I G N I G M V C D G A K P S C A A K I A S A V D A G I M G F L . M G R . . . . K N . R V F Q S G E  
UniRef100\_A0A1H8CME3 . . . . . G G . I . K E I S Q . . T I T S T L A N V S G I V C D G A K P S C A A K I A S L D A I L L A C Y . M T M Q . . . . S . R F K S G E  
UniRef100\_A0A1H8GDB8 . . . . . . . . . . E E I S G . A V K N A V A D L S G M I C D G A K S G C A L K I S S A A S A I R N A L . L A K N . . . . G . N Y A E K I N  
UniRef100\_A0A1H9PFY8 . . . . . G S . F . A Q F E A . . T I V N T L A N V G G I V C D G A K P S C A A K I C A A V D A A I L G C D . M A I . . . . A D . D N F L A G D  
UniRef100\_A0A1I0AD93 . . . . . Y . Q P I S L . A L S S M V G D I A G I I C D G A S N S C A M K V S T S A S A F K A V L . M A I S . . . . S . S G V T G N E  
UniRef100\_A0A1I0AYQ7 . . . . . . . . . . T Q M D G . V I K N M L A N I T G M V C D G A K A G C A L K I S S S A S A A I Q A T I . L A I N . . . . N . Q I V P A G E  
UniRef100\_A0A1I0DCR3 . . . . . G D . Y . S H I G K . . T I T A L C N V G G I V C D G A K P S C A A K I A S V H A A I L G H Y . M S M . . . . G G . R Q F E A G E  
UniRef100\_A0A1I0EJZ8 . . . . . G D . Y . K C I A H . . T I V N L A I T S G I I C D G A K S S C A A K I A A S V D A G I L G Y Q . M Y L E . . . . G . Q E F K D G D  
UniRef100\_A0A1I0VIM5 . . . . . L . E N I K C . . S I Q N M I G N V S G M I C D G A N G T C A L K I A T G I G G A I Q C A K . L G M N . . . . K . I T P K V T D  
UniRef100\_A0A1I0WME0 . . . . . L . K N V N Y . . A I K N M A G N I V G M I C D G A K T G C A L K V S T G V S A A V Q S A L . L A I E . . . . E . I E I G T D  
UniRef100\_A0A1I1YW91 . . . . . W L . V . P O I E K . . V I E S T L V N V G G I I C D G A K S T C A A K I A T A L D A M I T S L D . M L E . . . . A G . F E G I D E  
UniRef100\_A0A1I1Z2V2 . . . . . . . . . . E Q I G G . . A I K N A I A D L S G M I C D G A K P G C A L K I S T A S A A V R N A L . L A K Q . . . . G . N Y A Q S I N  
UniRef100\_A0A1I2NY07 . . . . . G R . K . N E I S H . . T I V N A I A I D S G M I C D G A K A S C A A K I A S V E A G I L G M Q . M G M H . . . . D . S E F Y G G D  
UniRef100\_A0A1I2QGI1 . . . . . G D . Y . E D I A H . . T I V N A L A I T S G I I C D G A K P S C A A K I S A V D A G I L G Y H . M Y K N . . . . G . Q O F F G G D  
UniRef100\_A0A1I3H524 . . . . . G D . Y . Q A V I H . . T I V N A L A I T S G I V C D G A K A S C A A K I S A A V D A G I M G F E . M Y R N . . . . G . Q O F Y G G D  
UniRef100\_A0A1I3JF93 . . . . . Y P . Y . T V L R D . . T I T N T I A T V G G M V C D G A K S S C A A K I A T A L E T A I L A V K . M S L H . . . . N . R V F Q P G E  
UniRef100\_A0A1I4GYP0 . . . . . . . . . . D K I E A . . A I N N L I S D T S G V Y C D G A K S C A L K S I T A A E L A I R H F D . F V Q A . . . . E . L D C Y L P S  
UniRef100\_A0A1I5C3D3 . . . . . G G . Y . K E I S E . . T I T N T I A N I G M V C D G A K P S C A A K I A S A V D A G I L G Y F . M S A . . . . N N . K V F A A G E  
UniRef100\_A0A1I5GNJ7 . . . . . G D . L . G O I S Q . . T I T N T L A N V S G I I C D G A K S S C A A K I A S V D A A I V A T M . M S L R . . . . G . K A F A P G D  
UniRef100\_A0A1I5LCC9 . . . . . G R . F . E V I A H . . T I A N T L A I C S G M V C D G A K P S C A A K I A S A V D A G I L G Y E . M Y L H . . . . G G . H E I R V D E  
UniRef100\_A0A1I5UNY4 . . . . . A Q M E M . A V N N T I V A F G I L C D G A R E A C A L K I S N A E A C G M E G A F . L A I D . . . . H . V E I R T N E  
UniRef100\_A0A1I5UQ63 . . . . . E O I G Y . A I N N M M G T V T G M L C D G A K A D C A M K V A T C V N T A F L S A S . M A I D . . . . D . I S V Q P N E  
UniRef100\_A0A1I5YMS6 . . . . . E S . E . E T V S L . T V A N T I A I S G M V C D G A K A S C A A K I S E A V D A I L G Y Q . M A K E . . . . G . K S F S G G D  
UniRef100\_A0A1I6BVG1 . . . . . . . . . . Q O I K A . . S I Q N T I G N V S G M I C D G A K A G C A M K V S T C S N V A V Q S A L . L A I N . . . . N . Q E I K S T D  
UniRef100\_A0A1I6J453 . . . . . K D . V . T V I R H . . T I V N A L A I T S G I V C D G A K A S C A A K I A T A V E A G I M G F E . M Y E E . . . . G . N E F L D G D  
UniRef100\_A0A1I6ZCV6 . . . . . G D . Y . K A I I H . . T I V N A L A I T S G I V C D G A K A S C A A K I S A A V D A G I L G M F E . M Y R N . . . . G . Q F Y G G D  
UniRef100\_A0A1I7FYH0 . . . . . . . . . . E D M D R . T I R N M A G I T G M I C D G G N Q G C V M K N I A A V D A A F R A S D . L A I A . . . . G . V A V D P V H  
UniRef100\_A0A1I7G945 . . . . . G G . L . R E I S H . . T I V N T L A I N S G V V C D G A K A S C A A K I A S I E A G I L G M H . M F Q R . . . . G . S E F R S G D  
UniRef100\_A0A1J0GCP0 . . . . . G G . Y . R D I S H . . T I V N A L S I V S G I I C D G A K A S C A A K I A T S V D A G I L G Y H . M F K E . . . . G . Q O F K G G D  
UniRef100\_A0A1J0LMS4 . . . . . S D . Y . I T V S N . . A I T N T L G N V S G I I C D G A K S C A S K I A T G V T A A F D S A M . L A K A . . . . Q . R V M N G G D  
UniRef100\_A0A1J4SKW3 . . . . . . . . . . L H I I A G . . A I K L I E D L A G V I C D G A K A G C A L K I A T A A G T A V Q A A L . F S L H . . . . G . M R V R A T D  
UniRef100\_A0A1J4SP72 . . . . . . . . . . N E R K A T L . A V N T V I S D I G M L C D G A K S G C A L K V A S S A S A I R A A W . M A I N . . . . D . E G I T G A E  
UniRef100\_A0A1J5H472 . . . . . . . . . . D I O I K Y . . A I D A V A N D L G M F C N G A N M G C A I K V A S S A H S A I A A F . S A A D . . . . G . Y C V A G P N  
UniRef100\_A0A1J5NN52 . . . . . . . . . . Q Q I I N . . . A M Q I V L G N L C C V I C D G A K E S C A L K I S T A A V E A V R A G Y . M A C Q . . . . G I . N L E A G T



UniRef100 A0A1K1MT69 ..... L. KEMEM... TVRNMVGNMAGMICDGAKSSCALKVASAVGAGIQAAM.LAMS...G..SAVPGNE  
UniRef100 A0A1M4PS13 ..... P.QISG... ASNMMIANLTGMICDGAKDTCALKLASAAEEAVIAAY.LANE...N.IIVKPN1  
UniRef100 A0A1M4STG0 ..... DG.DY.KSIIH... TIVNALAITSIGVICDGAKASCAAKIISAAVDAMGPF.MYRN...G.QQFYGGD  
UniRef100 A0A1M4TNU5 ..... RAIEA... VIKNIIGDLGMVCDGAKGGCAFKLTTSTGKAITAA.LALR...G.VSIEASD  
UniRef100 A0A1M4UGEO ..... P.QISG... AAKNILSNLTGMICDGAKETCSFKLSTGAEAVLSA.LALE...N.VIVKPGI  
UniRef100 A0A1M4Z8B4 ..... GR.F.PEIAH... TIVNSLAVVSGMICDGAKPSCAAKIIVSVVEAGILGYH.MYLQ...G.QEFRGGD  
UniRef100 A0A1M5GZC8 ..... Y.EQVSF... AVKNMIANLTGMICDGAKPSCALKVSAGVSTAVLSAM.LAMQ...Q.KCVTSVE  
UniRef100 A0A1M5KAR9 ..... K.QIEG... SIENMIANLTGMICDGAKSGCALKLASAAVSSSI.IAKY...N.CIVPPLN  
UniRef100 A0A1M5PK79 ..... P.QIEG... SIENMIANLTGMICDGAKAGCALKLASAAASVQSAI.IAKY...N.CVVPPLN  
UniRef100 A0A1M5Q7B8 ..... P.QIEG... AIENMIANLTGMICDGAKAGCALKLASAAASVQSAI.IANN...E.CYVPPMN  
UniRef100 A0A1M5T798 ..... AS.E.KILEE... TILSNLNVSSGILLCDGAKPSCAMKIAASGLRNAFLAYE.QAKS...G.NSFVEQD  
UniRef100 A0A1M5VGJ1 ..... AEIKS... AINNMQGNITGMFCDDGAKAGCALKLSTCTSAASVQSAI.MAVE...G.KTIOATD  
UniRef100 A0A1M5VKN1 ..... I.DHMA... AIKNMIEDLAGVICDGAKAGCALKLNTAAGAAVQAAL.FSLQ...G.INVKDTD  
UniRef100 A0A1M5VQ04 ..... A.QIQG... AQCNMLSNLTGMICDGAKETCALKLSTSAAGEAVIAAY.LAME...N.IVRSNT  
UniRef100 A0A1M5WD19 ..... D.QIDG... VIKNMIANLTGMICDGAKVSCAFKLATAASTAVQSAI.LALN...D.SIALPKN  
UniRef100 A0A1M5XAW4 ..... GR.Y.DEIAH... TIVNALAVISGMTCDGAKPSCAAKIAAAVDNIGIFYKY.LYLA...G.HQFYAGD  
UniRef100 A0A1M6BFP7 ..... GD.Y.EAISK... TIINTTANVSGIVCDGAKPSCAAKIAAAVDAGILGHQ.LST...EG.KVFRSGE  
UniRef100 A0A1M6DK99 ..... F.EQCCY... AIONVLSDDSGMVCDGAKSSCALKVCTASGVAVRAFL.MAIQ...D.KVVTGQ.  
UniRef100 A0A1M6GP45 ..... I.KNICY... AIKNMLADVSGIICDGAKSTCALKIATAVNAAIQCSAI.LAMS...N.IEPCSDN  
UniRef100 A0A1M6GZ67 ..... E.QLEN... SIKNMIANQAGVICDGAKPGCALKLGTAAASVQSAI.YALY...N.HYASDNN  
UniRef100 A0A1M6HOC3 ..... K.QIEK... SINNMVAGISGMICDGAKLGSYKVSVAVDAAIDASN.MALQ...N.IYIPSDN  
UniRef100 A0A1M6IAS0 ..... Y.DGIER... TIKNMVGSVSGMICDGAKTSCKALKVASCEAAISSAL.LAVK...G.CVCPGSD  
UniRef100 A0A1M6I196 ..... GR.F.EEIAH... TLVNALATVSGIICDGAKPSCAGKIAASVDAGILGYE.MYKR...G.QQFYGGD  
UniRef100 A0A1M6JO95 ..... G.DY.RAVH... TLVNALAIVSGMVCDGAKASCAAKIAAAVDAGILGYN.MFIR...G.QQFYGGD  
UniRef100 A0A1M6K9G6 ..... L.VEVER... TIKNMVGTIAGMICDGAKTSCKALKVASSVEAAINSAL.LAMK...G.TSVPGSD  
UniRef100 A0A1M6LSS0 ..... E.RIDG... TIKNMVIANLTGMVCDGAKVSGCALKLATAAATAVQSAI.LAMR...R.VIVPSKN  
UniRef100 A0A1M6MO80 ..... E.QLEN... AIKNMIANQAGVICDGAKPGCALKLGTAAASVQSAI.YSLY...N.HYASDNN  
UniRef100 A0A1M6MM06 ..... S.QIEG... AIENMIANLTGMICDGAKAGCALKLASAAASVQSAI.IAKY...N.CIVPPLN  
UniRef100 A0A1M6MYB4 ..... AP.L.ETISK... TITNVLGNVSGIVCDGAKSSCAAKIAASVDAIMGHY.MAM...ED.NTFGAGE  
UniRef100 A0A1M6N718 ..... E.TKIEY... AIKNMTGNITAGMICDGAKTGCALKVSTGVSAAIQSAI.LAMD...G.IEISYND  
UniRef100 A0A1M6R2P9 ..... K.DKIFG... TILNMGISIIGIICDGAKEGCAKYLALASGWAIVQSAI.LSLN...D.AVVKNTD  
UniRef100 A0A1M6R6E8 ..... D.DKIDG... TIKNMIANISGMICDGAKEVGCALKKLATSAATAIQSAI.LAIN...G.RIVPPRN  
UniRef100 A0A1M6RMI9 ..... A.NHIA... AIKNLMIEDLAGIICDGAKSGCAFKLSTAAATGAVAL.FALQ...G.KVVMETD  
UniRef100 A0A1M6SVH4 ..... G.GM.KEIVH... TVVNLISIVSGMVCDGAKASCAAKIAFVSAGLGLGYE.MYVR...G.QQFRDGD  
UniRef100 A0A1M6UB70 ..... GD.Y.KMIVH... TIVNALAITSIGVICDGAKASCAAKIAAAVDAGILGFE.MYRN...G.QQFYDGE  
UniRef100 A0A1M6WQD0 ..... EG.Y.DTVIH... TLVNALAASSGIICDGAKASCAAKIAATAVDTGLMGYE.MYKK...G.QQFYAGD  
UniRef100 A0A1M7NFT1 ..... GD.Y.QKISK... TIINTTIANVSGIVCDGAKSSCAAKIASAVEAAIMAHF.LGE...EN.LCFHPGD  
UniRef100 A0A1M7SGS9 ..... E.QEMAR... AVNSMIGNVTGICDGAKSSCALKANSSVGAIAIYAM.LAMS...G.LGVGTGE  
UniRef100 A0A1M7Y683 ..... V.EHMA... AIRNMIEDLAGVICDGAKAGCAIKLNTAAAGAAVQAAL.FSLQ...G.INVKDTD  
UniRef100 A0A1N6J3Z7 ..... L.EEVER... TIKNMIGTISGMICDGAKTSCKALKVASVEAAINSAL.LAMK...G.TSVPGTD  
UniRef100 A0A1N6S191 ..... G.KIEL... AIKQMGIDSSGIICDGAKSTCALKAVTAFEQAYKHXY.LAKS...G.LELETPV  
UniRef100 A0A1N6XX89 ..... L.PETED... TINTALGGISGMICDGAKEPCAMKIALAVQNLGLACV.LSLK...G.KRITPGE  
UniRef100 A0A1Q3RG43 ..... P.LEG... AIONMIANITGMICDGAKVGCSSKLKLTASAAAVQSAI.LSMS...G.VTVPDGN  
UniRef100 A0A1Q6FZ05 ..... Y.DEVCS... AVKNMIANLTGMICDGAKPSCALKLSSGVSTAVLSAM.MAME...H.ECVSSVE  
UniRef100 A0A1Q6RQ90 ..... S.HVRM... AIONSLGNITFGVLCDDGAKETCSLKVANCTFSAVSAF.LALK...G.NSPKMKK  
UniRef100 A0A1Q6SN88 ..... D.GY.EVIAH... TLVNSLAIIVSGIICDGAKASCAAKIISTAVDAGLMGYA.MYKQ...G.QQFHAGD  
UniRef100 A0A1Q8D7G1 ..... F.EQSCF... AIONVLSDDSGMVCDGAKASCAMKVVSTSSGAARVGLF.MALN...S.HSVSQ.  
UniRef100 A0A1R0YKY3 ..... F.EQIKH... GIQNTIASLTGMICDGAKSTCALKISTATNAAIQAAT.LAMN...N.ISPTDRD  
UniRef100 A0A1R1D2Q5 ..... L.EQIKR... SIQNTIASLTGMICDGAKPTCALKISTATNAAIQSAI.LAMN...D.ISASGLND  
UniRef100 A0A1R1GJC3 ..... L.AQIKH... SIQNTIASLTGMICDGAKPTCALKISTATNAAIQSAI.LAMN...D.ISASGLND  
UniRef100 A0A1R3ED69 ..... F.EQSCY... AIONVLSDDSGMVCDGAKSTCAMKVKISTSAANGFL.MAMR...C.NEHNQ.  
UniRef100 A0A1R4BE68 ..... Y.QQVSY... AVSSMIGDVGAVICDGAKTAAMKVVSSAGAAIKKAL.MAID...N.QFVDSQE  
UniRef100 A0A1R4I9H4 ..... Y.ETVER... AVTMCDDTVGMVCDGAAPSCATLKVASVGSASRAVV.LALA...E.QRVDSGN  
UniRef100 A0A1S1HS3C ..... Y.EVWAM... AISSMIGDVSIGMICDGAANSAMKVVSTSAASAYKAVL.MALD...N.SCVRSGD  
UniRef100 A0A1S1X543 ..... Y.SAVSM... AISSMIGDLGAGMICDGAANSAMKVVSTSAASAYKAVL.MALD...G.TRVTGNE  
UniRef100 A0A1S1YUP3 ..... GT.V.EAIQN... AITNTLGNVSGVICDGAKASCATKIASGIYSAFDGAM.LAQM...G.SVLSSDD  
UniRef100 A0A1S2RI28 ..... P.QIKA... AVQNTIGNVSGMICDGAKAGCAMKVVSTCSNVAVQSAI.LALN...N.RAIQSTD  
UniRef100 A0A1S6HLU4 ..... Y.QQSCF... AIONVLSDDSGMVCDGAKSTCAMKVKISTSGAVNAFM.LAIQ...S.TAAQDQ.  
UniRef100 A0A1S8TR81 ..... GE.Y.KDISH... TIVNALISVSGIVCDGAKASCAAKIAAGVDNIGIFYKY.MYKN...G.QQFRSGD  
UniRef100 A0A1S9BSA6 ..... GD.Y.AHIAK... TITNTIANVSGIVCDGAKPSCAAKIAASVNAAILAHY.MSM...ND.KSFPGE  
UniRef100 A0A1S9BSQ4 ..... GG.F.EEISH... TLVNSLAIIVSGIICDGAKASCAGKIAASVEAGILGYH.MYKN...G.QEKFKEG  
UniRef100 A0A1T0AV48 ..... F.DTISM... AISSMIGDISIIGIICDGAANSAMKVVSTSVSSGYSKVL.MALD...N.TQVTGNE  
UniRef100 A0A1T4LAU6 ..... DN.F.GVIEN... LVTNGLATASGIICDGAKESCASKISTALFSAMLGYE.MAKN...L.RVFEESC  
UniRef100 A0A1T4PBB4 ..... Q.QIGG... AIKNMAGSLVGMICDGAKGGCAFKLSTAAEAIQAE.LAME...N.VFIDDL  
UniRef100 A0A1T4QX93 ..... GT.Y.EDVSN... AIGNTLGNLTSGVICDGAKASCAAKIASGIYAFDGLCL.LSLT...G.NVLGAGD  
UniRef100 A0A1T4URR3 ..... F.QQISA... AINSMIGDITAGMICDGAKTSAMKVVSSAGAIKSAI.MALD...G.LSVTSGE  
UniRef100 A0A1T4WZ02 ..... F.DQVVM... TINNMVGSITAGMICDGAKNGCALKVASAVDSGLRAAM.LALE...G.HTITGRE  
UniRef100 A0A1T4XXG0 ..... N.QIAG... AIKNMIGNLAGLLCDGAKGGCAFKLSTASSEAVIQAY.LAKN...N.VIISDYD  
UniRef100 A0A1T4XUV8 ..... AD.L.KAVSH... TLVNALAIIVSGIICDGAKASCAAKIAASVEAGILGYH.MYKN...G.QQFRSGD  
UniRef100 A0A1T5DQJ1 ..... L.EQVKF... SVQNMIGNLTIGVICDGAKPNCAMKVAITGVSAVSSSL.AAMD...N.VSCTSL  
UniRef100 A0A1T5E6Y2 ..... AG.Y.ETISQ... TILSNLAIIVSGIICDGAKPSCAAKIALSVNAGIIFGE.MCQF...G.QKFCGGD  
UniRef100 A0A1T5JEM8 ..... Y.DQVAA... SVKNMIANLTGMVCDGAKPSCALKVSAGVSTAVLSAM.LAVQ...N.HSVSSVE  
UniRef100 A0A1T5M617 ..... S.DQIFG... TILNMVGSISGIICDGAKEGCAKYLALASGWAIVQSAI.LSIN...G.AVVNYND  
UniRef100 A0A1T5MAJ7 ..... G.TL.DQIEK... TIINTTANVSGIVCDGAKASCAAKIASSLDAAIMAHF.LAMS...N.IAFDYS  
UniRef100 A0A1U7JGC7 ..... F.EQSCY... AINLVLADISGMVCDGAKASCALKVGSAASSAYKAAT.IAMK...V.DGSMCM.  
UniRef100 A0A1U7M6Z4 ..... K.QIIGG... AIKNMVGTLTGMVCDGAKGGCAFKLSTASSEAIQAE.LAMA...D.VVIGDID  
UniRef100 A0A1U9NH09 ..... L.NHIAS... AIKNLICDLAGICDGAKASCAFKLATAASTAVQSAI.FSLH...G.INVKESD  
UniRef100 A0A1V1HYA7 ..... K.KIEG... AMEHIVASLTGMICDGAKSG



UniRef100\_A0A1W1ZA37 . . . . . AD.Y. . DV I GK . . . T L I N S L G N V G G I I C D G A K A S C A A K I S S A V D A G I M G Y E . M A K . . . . H D . L F F P F G E  
UniRef100\_A0A1W9T4P7 . . . . . D Q I A G . . . T I N N M S G D L A G M V C D G A K G G C A F K L S T A S G E A I L S A K . L A K N . . . . N . I F I S E T E  
UniRef100\_A0A1W9V6P9 . . . . . Y . E O I E Y . . A I K N M V G N V S G I I C D G A K N A C S L K V S C V S A G V Q G A L . L A I N . . . . G . I S V S D N E  
UniRef100\_A0A1W9WF36 . . . . . V . E K I G G . . A I K N H I E N T A T L L C D G A K T S C A L K V G E A A S S G V K S A L . M A I Q . . . . G . T V V K P V D  
UniRef100\_A0A1W9XB25 . . . . . D M E K I T L . . A V N N L I S D I G M L C D G A K G G C A L K V V S S D S A I S R A Y . M A I N . . . . D . H G I T E K E  
UniRef100\_A0A1X3RM3 . . . . . L . N V I Q A . . A I I N M V S D V S G I I C D G A S N S C A M K V S S V T M A F R A V L . M A Q K . . . . G . M Q V S G H D  
UniRef100\_A0A1X7AQ07 . . . . . E . E O M S Y . . A I F N M F G D V T G I L C D G A G T G C S L K V S T S A Q A A V K A A L . M A I D . . . . G . T R I T G H E  
UniRef100\_A0A1X7EL00 . . . . . L . K E V E G . . T I R N T L G D I A G M V C D G A K T S C A L K V S A S A V E A A I N A A F . L S M K . . . . G . T C I P G K D  
UniRef100\_A0A1X7KM00 . . . . . V . D Q S T K . . A M E V V L G N L V G M V C D G A K E T C A L K V S T G A A E A Y C A A M . V A I E . . . . G . K Y L K G T Q  
UniRef100\_A0A1Y3QXR2 . . . . . Y . G O V A A . . A V K N M I A N L T G M I C D G A K P S C S M K L T S G V S T A V I S A M . M A I D . . . . G . H C V T P V E  
UniRef100\_A0A1Y3RRP8 . . . . . G G . Y . . D Q V K H . . T I V N A L A F H S G V V C D G A K S S C A A K I S M A V E A G I F G Y Q . M Y O N . . . . G . Q E F R T G D  
UniRef100\_A0A1Y3RX83 . . . . . D . A Q M G A . . A I I N M S G N L T G M I C D G G K I G C A L K L I A T A S N A A I M S A Y . L A M G . . . . G . V V V S A S D  
UniRef100\_A0A1Y3SMD1 . . . . . M G . M . D G V A H . . T I V N S L A V S G M V C D G A K S C A A K I S L A L E A G I L M G Y E . M Y K A . . . . G . H E F Y D G D  
UniRef100\_A0A1Y3SQP2 . . . . . G R . F . K E I A H . . T I V N A L A I N S G V V C D G A K A S C A A K I A S A V E A G T L G M K . M Y Q F . . . . G . S E F Y G G D  
UniRef100\_A0A1Y3TK97 . . . . . G . D Y . Q A V I H . . T I V N A L A I T S G I V C D G A K A S C A A K I A F S V D A G I L G F H . M Y O N . . . . G . Q E F K S G D  
UniRef100\_A0A1Y3U0C8 . . . . . A D . Y . E A I A H . . T I V N S L A I V S G I I C D G A K P S C A A K I A S V E A G I M G Y H . M Y L N . . . . G . Q Q F L A G D  
UniRef100\_A0A1Y3VGJ2 . . . . . Y . D R A A A . . A V K N M I A N L T G M I C D G A K P S C A M K L M S G V S T A V L S A M . M A M D . . . . G . R C V S S A E  
UniRef100\_A0A1Y3WJ31 . . . . . A D . Y . K A I A H . . T I V N A L A I V S G I I C D G A K P S C A A K I A S V E A G I M G Y H . M Y L N . . . . G . Q Q F R A G D  
UniRef100\_A0A1Y3WTJ9 . . . . . . D A M A R . . T I C N M A S S I T G M I C D G G N Q G C T M K G V V A V D A A Y R S V S . M A M Q . . . . G . I A I D P I H  
UniRef100\_A0A1Y3XW41 . . . . . G T . P . E Q V G A . . T I V N T L G N V G G I V C D G A K S S C A A K I S A A V D A A I L G H D . M A M . . . . A G . R S F R A G E  
UniRef100\_A0A1Y3YKX8 . . . . . M G . L . D G V A H . . T I V N S L A V S G M V C D G A K A S C A A K I S L A L E A G I L M G Y E . M Y K A . . . . G . H E F Y D G D  
UniRef100\_A0A1Y4AGU1 . . . . . G T . Y . E E V A G . . T I V N T L G N V G G I V C D G A K S S C A A K I A T A V D A A I L G L E . M A R . . . . A G . H G F H A G E  
UniRef100\_A0A1Y4AKU3 . . . . . Y . E Q V V A . . A V K N M I A N L T G M I C D G A K P S C A M K L T S G V S T A V L S A M . M A M D . . . . G . H C V T P V E  
UniRef100\_A0A1Y4B7K2 . . . . . G T . L . E Q I E N . . T V V N T I A D A G G I V C D G A K P S C A A K I S T A L Q A A I L S H K . M A M . . . . R G . L T F F R G E  
UniRef100\_A0A1Y4BR86 . . . . . G R . . . A . D E V A H . . T V V N A I A I E S G M V C D G A K A S C A A K I A S A V E A G I L G M Q . M O R Q . . . . G . K O F F G G D  
UniRef100\_A0A1Y4CAT4 . . . . . . . . . . . E Q S V Q . . . A M Q T V I G T I G M F C D G A K S S C A Y K L S T A A A M A V Q A A Y . L A M A . . . . G . C H V P A G E  
UniRef100\_A0A1Y4CBR2 . . . . . Y . E E I I C S . . A I K N M I G N I T G M V C D G A K V G C A M K V A S G V S S I Q S A V . L A I N . . . . G . I S A T E H D  
UniRef100\_A0A1Y4DE51 . . . . . . . . . . . C V P A V T L . . S I N N I S D I G M L C D G A K S G C A L K V V S T D A A I R A A Y . M A I H . . . . D . Y G I T E V E  
UniRef100\_A0A1Y4EB47 . . . . . . . . . . . C G . Y . . D V V A G . . T I I N T I G N V G G I V C D G A K S S C A A K I S T A V D A A I L G L E . M A R . . . . S G . N H F H A G E  
UniRef100\_A0A1Y4GD89 . . . . . G A D . T E E V . Y . G A V C R . . T I V N G I C T I G M V C D G A K S S C A T K I S V A V E N A I M A M D . L A M E . . . . G . H F W Q P G E  
UniRef100\_A0A1Y4GPW5 . . . . . . . . . . . Y . D Q I C A . . A M S L L L S D I A G M L C D G A K E S C A L K V G S A S S E A Y C A M E . W A M S . . . . G . Q H L A V P Q  
UniRef100\_A0A1Y4HBY4 . . . . . . . . . . . G . T F . E D I A H . . T V V N A L A I V S G I V C D G A K A S C A A K I A S V E A G I L G Y N . M Y K C . . . . G . Q Q F Y A G D  
UniRef100\_A0A1Y4HFY2 . . . . . . . . . . . G G . L . D D V A H . . T I V N S V A I T S G I I C D G A K P S C A A K I A S A V D A G I L G W Q . M Y R A . . . . G . R Q F Y D G E  
UniRef100\_A0A1Y4HLT3 . . . . . . . . . . . G T . A . E Q V G A . . T V V N T L A N V G G I V C D G A K S S C A A K I S A A V D A A I L G H D . M A M . . . . V G . R S F H A G E  
UniRef100\_A0A1Y4I7G9 . . . . . . . . . . . N G . N R . E A V R R . . S I T N T L A N T S G I I C D G A K P S C A A K I S S G L D G A I L G C A . L S I H . . . . Q . R Q Y C E Q D  
UniRef100\_A0A1Y4IMH5 . . . . . . . . . . . G D . F . R C I A H . . T I V N A L A I V S G I V C D G A K P S C A G K I A S A V D A G I L G Y E . M Y C Q . . . . G . Q Q F R G G E  
UniRef100\_A0A1Y4J1U9 . . . . . . . . . . . G R . Y . K E I A H . . T I V N A I D S G M I C D G A K A S C A A K I A S A V E A G I L G W K . M Q Q H . . . . H . S Q F Y G G D  
UniRef100\_A0A1Y4K8B3 . . . . . . . . . . . G R . Y . R E V A H . . T V V N A L A I D S G M V C D G A K A S C A A K I A S A V E A G I L G M Q . M Q R R . . . . G . E Q F F G G D  
UniRef100\_A0A1Y4KX19 . . . . . . . . . . . . . . . . . . . . . Q Q I K G . . V I C N M A G I T G M I C D G G N H G C V M K G I T A V D A A F R S V D . M A M N . . . . G . I F I R P P H  
UniRef100\_A0A1Y4L2N8 . . . . . . . . . . . G R . K . M E I S H . . V I V N A V A I N S G V I C D G A K A S C A A K I A S A V E A G I L G L Q . M Q K R . . . . G . K E F Y G G D  
UniRef100\_A0A1Y4LE84 . . . . . . . . . . . G G . Y . E D I A H . . T I V N S L A I V S G V I C D G A K P S C A A K I A A A V D A G I L G H Q . M Y C D . . . . G . Q Q F Y G G D  
UniRef100\_A0A1Y4LNF7 . . . . . . . . . . . G D . Y . D E I A H . . T I V N A L A I T S G I V C D G A K A S C A A K I A A A V D A G I L G F E . M Y R N . . . . G . Q Q F Y G G D  
UniRef100\_A0A1Y4N2U3 . . . . . . . . . . . G D . E . A V I S Q . . T I V N T L G N V S G I V C D G A K P S C A A K I A S S L D A A I L G C A . M A M K . . . . Q . R G F R P E E  
UniRef100\_A0A1Y4NQE2 . . . . . . . . . . . G . D Y . Q A V I H . . T V V N A L A I V S G I V C D G A K A S C A A K I A F S V D A G I L G Y N . M Y K N . . . . N . Q E F K P G E  
UniRef100\_A0A1Y4QRC3 . . . . . . . . . . . G D . Y . K C I A H . . T I V N S L A I T S G I I C D G A K S S C A A K I A A S V D A G I L G Y R . M Y I E . . . . G . Q Q F K D G D  
UniRef100\_A0A1Y4RAY4 . . . . . . . . . . . . . . . . . . . . . E Q V A A . . A M Q N T I P N V F G V V C D G A K L A C A L R I S S G T G A I L E C S D . L A I K . . . . G . V R L A N N Q  
UniRef100\_A0A1Y4RFN6 . . . . . . . . . . . G D . F . D V V S H . . T V N S A L A I V S G M V C D G A K P S C A G K I A T A V G A I L G Y Q . M Y I R . . . . G . Q Q F C G G D  
UniRef100\_A0A1Y4SX17 . . . . . . . . . . . G D . Y . E A I C H . . T M V N G L A I V S G I I C D G A K P S C A G K I A A S V D A G I L G Y Y . M Y K N . . . . G . C E F K D G E  
UniRef100\_A0A1Y4U252 . . . . . . . . . . . G T . A . G . Q I E N . . T V V N T I V N A G G I T C D G A K P S C A A K I F S S L Q A A F L G H S . L A M . . . . R G . F R F E A G E  
UniRef100\_A0A1Y4VZE6 . . . . . . . . . . . G D . Y . E A L C H . . T M V N G L A I V S G I I C D G A K P S C A G K I A A S V D A G I L G Y Y . M Y K N . . . . G . C E F K D G E  
UniRef100\_A0A1Y4W9A0 . . . . . . . . . . . G S . Y . Y . D A I K H . . T I V N S L A V S G I I C D G A K A S C A A K I L S A V E S G I F G Y E . M Y C N . . . . G . Q Q F Y G G D  
UniRef100\_A0A1Y4WC44 . . . . . . . . . . . . . . . . . . . . . D A Q M G A . . A I I N M S G N L T G M I C D G G K I G C A L K L A T A S A A I M S A Y . L A M G . . . . G . V V V S A S D  
UniRef100\_A0A1Y6L1T5 . . . . . . . . . . . . . . . . . . . . . I . K O I S I . . A I N S M I G D I A G M I C D G A K T S C A M K V S S A S A A V K S A L . M A I D . . . . G . I G V T G N E  
UniRef100\_A0A209B1S3 . . . . . . . . . . . . . . . . . . . . . Y . Q T I S Y . . A V S N M I S D I S G I I C D G A S N S C A M K V S T A T A C A F K S V L . M A Q K . . . . N . T V V G E R D  
UniRef100\_A0A212J279 . . . . . . . . . . . G S . Y . . Q Q I A D . . T I I N T L V N V S G I V C D G A K S S C A A K I S S A V D A A I T A H D . L S M Q . . . . G . K V F P A G E  
UniRef100\_A0A212J3C8 . . . . . . . . . . . . . . . . . . . . . A A Q T A . . A M Q T V I G T F A G M L C D G A K A S C A F K V A A V G A A I D A E . L A V S . . . . G . G A H V A A D  
UniRef100\_A0A212JD56 . . . . . . . . . . . . . . . . . . . . . Y . N Q I T F . . A V K N M V G N I T G M I C D G A K P S C A L K I S S G V S T A V I S A I . M A M E . . . . Q . K V V S S L E  
UniRef100\_A0A212KAX4 . . . . . . . . . . . . . . . . . . . . . I . E O I D R . . T I R N M V G N V A G M I C D G A K T G C A M K V A S A V G A G Q S A M . L A M D . . . . G . M G V T R N E  
UniRef100\_A0A226BWM1 . . . . . . . . . . . . . . . . . . . . . D I D I V A . . V I D N I I A N N S G V V C D G A K P S C A I K I L T A A D L S Y Q T A L . L S V N . . . . G . L H I S C G N  
UniRef100\_A0A239JB3F . . . . . . . . . . . . . . . . . . . . . L . H H I A G . . A I K L L I E D L A G V I C D G A K A G C A L K L T A A G T A V Q A A L . F S I H . . . . G . M R V R A T D  
UniRef100\_A0A239G347 . . . . . . . . . . . . . . . . . . . . . G . T L . E K I E K . . T I I N T L A N V S G I V C D G A K A S C A A K I A S S L D A A M A H F . L A M R . . . . D . S V F E V D S  
UniRef100\_A0A239ITT9 . . . . . . . . . . . . . . . . . . . . . D E I E G . . V I K N V L G D I S G M I C D G A K V G C A L K L S T S A S A A V Q A A L . L A I D . . . . H . Q I I P A G N  
UniRef100\_A0A239RJY8 . . . . . . . . . . . . . . . . . . . . . Y . T D I C H . . A V Q N M I A N L T G M I C D G A K P S C S L K I S S G V S T A I L S A V . L A R E . . . . G . R H V T A A E  
UniRef100\_A0A239TM99 . . . . . . . . . . . . . . . . . . . . . G N . F . N Q I A S . . T I I N T L G N T C G I I C D G A K P S C A A K I S S S L D A A I L A H T . M S M . . . . K G . D F T K S G E  
UniRef100\_A0A242V4K8 . . . . . . . . . . . . . . . . . . . . . F . F . E Q S C Y . . A I Q N V I S D S S G M V C D G A K S S C A M K V C T S S T T A V R S Y L . M A M G . . . . N . H S V K N Q E  
UniRef100\_A0A254V0A7 . . . . . . . . . . . . . . . . . . . . . Y . Q V V S M . . A I S S M I G D V A G M I C D G A S N S C A M K V S T S A G A A Y K A V L . M A I D . . . . G . T R V T G N E  
UniRef100\_A0A255TJW7 . . . . . . . . . . . . . . . . . . . . . Y . L R V C Q . . S V K N M I A N L T G M I C D G A K P S C A L K I S S G V S T A I L S A L . L S M E . . . . G . K C V S S A E  
UniRef100\_A0A256C0N1 . . . . . . . . . . . . . . . . . . . . . L . E V I N D . . A I C S M I G D V S G I I C D G A A N S C A M K V S S T A N A A F K A V M . M A I D . . . . N . R V T T G Q E  
UniRef100\_A0A257UFP3 . . . . . . . . . . . . . . . . . . . . . P . D E V S A . . A T T N I V G N L A G M I C D G A K I G C A L K T M T G V D A A F R A A S . L A R A . . . . G . L V I P V T D  
UniRef100\_A0A259UK57 . . . . . . . . . . . . . . . . . . . . . Y . E T V S M . . A I S N M I G D V A G M I C D G A S N S C A I K V S T S I A A A Y K A V L . M A I E . . . . G . T R V T K S E  
UniRef100\_A0A259UK69 . . . . . . . . . . . . . . . . . . . . . I . T M I E S . . A M K N I A N L T G M I C D G G K V G C S L K L T A A A A V E S S L . L A Q R . . . . N . I V V P D T N  
UniRef100\_A0A264YA23 . . . . . . . . . . . . . . . . . . . . . Y . Q H I C S . . A V K N M I A N L T G M I C D G A K P S C A L K I S S G V S T A I L S A L . L S M E . . . . G . K C V S S V E  
UniRef100\_A0A265Q339 . . . . . . . . . . . . . . . . . . . . . . . R E I S G . . A A N N M L S N L T G M I C D G A K E T C S F K L T S A G E A V L A A Y . L A I E . . . . N . I I V K P N I  
UniRef100\_A0A265Q6G2 . . . . . . . . . . . . . . . . . . . . . . . A I T S . . T I N N I I A N Q A G V I C D G A K P S C A L K I G T A A S T A V Q A L . L A I E . . . . G . I T I K D F N  
UniRef100\_A0A267MKY3 . . . . . . . . . . . . . . . . . . . . . . . A Q I D G . . T I V K N M I A N L S G M I C D G A K V G C A L K L S T S A S A A I Q A V L . L S L N . . . . D . A I V P T R N  
UniRef100\_A0A291TB67 . . . . . . . . . . . . . . . . . . . . . D . G Y . Q A A I H . . T I V N A L A I V S G I V C D G A K A S C A A K I A S S V D A A I L G Y N . M Y K C . . . . N . Q E F K G G D  
UniRef100\_A0A2A5JYP0 . . . . . . . . . . . . . . . . . . . . . Q Q I S Y . . A M Q N S I G N V T G M L C D G A K A G C A M K V S T C T G A A V Q S A L . L A S S . . . . G . L R V P G T N  
UniRef100\_A0A2A5QBH2 . . . . . . . . . . . . . . . . . . . . . Y . E V V A M . . A I S S M I G D V S G M I C D G A S N S C A M K V S T S A A A Y K A V L . M A I D . . . . N . S C V R G S D  
UniRef100\_A0A2C5T5X0 . . . . . . . . . . . . . . . . . . . . . Y . E P V A M . . A I S S M I G D I T G I I C D G A S N S C A M K V S S G V S A A Y K A V L . M A M N . . . . Q . Q C V S G N D  
UniRef100\_A0A2C6DCR8 . . . . . . . . . . . . . . . . . . . . . F . D T V G M . . A I S S M I G D V S G M I C D G A S N S C A M K V S T S A S A A Y K A V L . M A I D . . . . G . C C V T G N E  
UniRef100\_A0A2C6DRU7 . . . . . . . . . . . . . . . . . . . . . G T . D . E Q I E Y . . S V I N T L G T L S G M I C D G A K A S C A A K I A T C V E T A V M C H E . I A M K . . . . N . D V L Q P G D  
UniRef100\_A0A2C9PBN0 . . . . . . . . . . . . . . . . . . . . . F . K Q I S D . . A I C S M I G D V A G M I C D G A K T S C A M K V S S A G A A F K A T L . M A I D . . . . G . I R V T G N E  
UniRef100\_A0A2D3W7E5 . . . . . . . . . . . . . . . . . . . . . E N . L . E V V S H . . S T A N L L G D V S G I I C D G A K S S C A M K I A T T I T A S F D S Y L . L A S Q . . . . G . R H L N A G D  
UniRef100\_A0A2G2MFD4 . . . . . . . . . . . . . . . . . . . . . E Q I E G . . A I N N M I A N V S G M I C D G A K D G C A L K I A T A A S T S Y S S I . L A I N . . . . G . S I V Q P R N  
UniRef100\_A0A2G6BX86 . . . . . . . . . . . . . . . . . . . . . N Q S F A . . A M K S M L A S L G M F C D G A K T C A Y K L E T A A G E A V I Y S Y . L A I E . . . . N . V A I D G Q D  
UniRef100\_A0A2G6E433 . . . . . . . . . . . . . . . . . . . . . . . N I D K I T L . . A I N N L L S D I G M L C D G A K G G C A L K V V S A T D S A I R S A Y . M A M N . . . . N . H G I N A I E  
UniRef100\_A0A2G6HZA5 . . . . . . . . . . . . . . . . . . . . . G G . F . N E I A H . . T I V N A L A I V S G I I C D G A T A S C A A K I A S A V E A G I L G H C . M Y Q Q . . . . G . Q T F Y G G D  
UniRef100\_A0A2G6K886 . . . . . . . . . . . . . . . . . . . . . S . D A I E R . . T I K N M A G S V M G I I C D G A K T G C A L K T S M A V G V A I E N A F . L A I E . . . . G . V V P P A D N  
UniRef100\_A0A2G6M529 . . . . . . . . . . . . . . . . . . . . . V . E Q S T K . . A M E I I L G N L V G M V C D G A K E T C A L K V S T G A A E A Y C A A M . V V I A . . . . G . D S L K G A Q  
UniRef100\_A0A2G6MW14 . . . . . . . . . . . . . . . . . . . . . M . P E I T H . . T I K N M V G S I S G M I C D G A K T S C A L K V A T A E S G V N A A L . L G M K . . . . G . I S V P G K D  
UniRef100\_A0A2G6N232 . . . . . . . . . . . . . . . . . . . . . G R . F . E E I A H . . T I V N A L A V S G I I C D G A K A S C A A K V A V A V D A G I T G Y F . M F E K . . . . G . Q Q F Y G G D  
UniRef100\_A0A2G6P3W9 . . . . . . . . . . . . . . . . . . . . . G R . Y . D E I S H . . T I V N A L A I S G V I C D G A K P S C A A K I A L S V E G G I L G Y F . M Y K E . . . . G . Q K F C S G D  
UniRef100\_A0A2G6PSX3 . . . . . . . . . . . . . . . . . . . . . G G . F . E E V A H . . T I V N A L A I V S G I I C D G A K P S C A G K I A A A V D A G I L G Y Q . M Y K N . . . . G . Q Q F Y G G D  
UniRef100\_A0A2G6QN57 . . . . . . . . . . . . . . . . . . . . . G . T Y . E Q I S A . . T I L T N S L A A V A G I I C D G A K V G C S A K A V L S L N A A F L A H . L A M S . . . . G . D I V E A G D  
UniRef100\_A0A2H0ZBF8 . . . . . . . . . . . . . . . . . . . . . . . D L E A I N A . . A V N N L I S D I G M L C D G A K S G C A L K V A S S D S S I R S A Y . M A I K . . . . G . H I G E D E  
UniRef100\_A0A2H9P7L0 . . . . . . . . . . . . . . . . . . . . . E Q I G A . . A I N L M S A N L T G V V C D G A K E G C S L K L T A A G T A T E S A L . M A I S . . . . G . V R V P S D N  
UniRef100\_A0A2H9T779 . . . . . . . . . . . . . . . . . . . . . F . S A S E R . . A V H N I I G D V S G M I C D G A K N G C A M K V S T S T Q A A I K A V L . I A I S . . . . G . S R V T G Q E  
UniRef100\_A0A2I0PJ08 . . . . . . . . . . . . . . . . . . . . . R E I E S . . A I Q I M M A N V T G M I C D G A K S G C A L K I S T C T Y A A F Q S A L . L A V S . . . . G . V S I S E K E  
UniRef100\_A0A2I0QA36 . . . . . . . . . . . . . . . . . . . . . . . Y . D Q V C Y . . A I K N M I G N M T G M V C D G A K I G C A L K V A S G V S A A V Q S V L . L A M D . . . . N . I C I S E N D  
UniRef100\_A0A2I1MB94 . . . . . . . . . . . . . . . . . . . . . E E I A G . . A C T N I F A N I T G M I C D G A K E S C S M K L T S A E E S I T A A Y . L A I N . . . . G . V V S Q A N V  
UniRef100\_A0A2I5TF53 . . . . . . . . . . . . . . . . . . . . . Y . E L V A M . . A I S S M I G D I S G I I C D G A A S C A M K V S T A T A A Y K A V L . M A I D . . . . R . S G V S G N D  
UniRef100\_A0A2I7N9R7 . . . . . . . . . . . . . . . . . . . . . E S . Y . E V V A K . . A I I N T L S G V S G V F C D G A N S S C S V K I A N G T Y A A F D G A A . S A M N . . . . G . N V V T P G E  
UniRef100\_A0A2I8NM82 . . . . . . . . . . . . . . . . . . . . . Y . K A I E M . . . A I S S M I G D V S G M I C D G A S N S C A M K V S T S V S S A W K S V M . M A I D . . . . D . C A V T G N E

UniRef100\_A0A2J6HXP9 . . . . . GG . F . KEV AH . . . TIVNALAI VS GIICDGA KPS CAGKIAA VEAGILGYH MYKN . . . G . QQFYGG E  
UniRef100\_A0A2J6XEK0 . . . . . N . KKI EN . . . SIKNVIAG LSGMICDGA KIG CAYKLYLSSISAI EASN MALN . . . K . IVIPSDN  
UniRef100\_A0A2J8B7A6 . . . . . GG . DV . QAVEQ . . . TIVNALAI VS SGIVCDGA KAS CAAKIAT AVDA GILGFE MYRN . . . G . RCFRRG D  
UniRef100\_A0A2K2TW32 . . . . . GS . E . EVV GL . . . TITNTIGN VGGIVCDGA KSS CAAKIASA VEAAVLAHY MAS . . . KH . KCFPGG E  
UniRef100\_A0A2K4ZDLC . . . . . GD . Y . KTI AH . . . CLVNSLAVT SGMICDGA KAS CAAKIAFS IESAILGYE MYKM . . . G . SQFRDGE  
UniRef100\_A0A2L2WL5 . . . . . Y . ETV CR . . . SVKNMIAN LTGMICDGA KPS CSLKISSG SVSTAILLSAL LSME . . . G . KCVSSAE  
UniRef100\_A0A2L2WWP7 . . . . . Y . EOI SA . . . AVKNMIAN LTGMICDGA KPS CALKLI TTGVSTAVLSAM LAMQ . . . G . NCVTPVE  
UniRef100\_A0A2M6ZWR1 . . . . . . REI NN . . . AINAAASN MTGVICDGA KY S CTLKAMTA AGVAMESAL MSVN . . . G . IKIPPN  
UniRef100\_A0A2M8H1P7 . . . . . Y . QOI SH . . . AISSMIGDIAGIICDGA KAA CAMKVSSSAGA AVKAAAL MAID . . . G . VYVTGRE  
UniRef100\_A0A2M8RT13 . . . . . F . DTI SR . . . VISSMIGDI SGIICDGA ANG CAMKVSTGVTSGYKAVL MAID . . . N . TNVTGDE  
UniRef100\_A0A2M8S313 . . . . . F . EAI SM . . . AISSMIGDI SGIICDGA ANS CAMKVSTSVTSGYKSVL MAME . . . D . SHVTGCE  
UniRef100\_A0A2M8TGF1 . . . . . GD . Y . KEI SH . . . TIVNALSI VSGIICDGA KAS CAAKIAAGVDA GILGY MYKN . . . G . QQFRDGD  
UniRef100\_A0A2N1PL94 . . . . . GD . L . TAV AN . . . AIVNTLGN ISGMICDGA KAS CALKIATGIYAFDAI LGFY . . . N . RAHSGD  
UniRef100\_A0A2N1QND6 . . . . . . ASA DR . . . AVQNIAGSLTGVICDGA KYG CALKLSAAGMAVEEAM LASS . . . G . YVVPGG D  
UniRef100\_A0A2N1QTJ0 . . . . . E . DQMA D . . . AMQLLSNL LAGMLCDGA KES CALKVSSASSEAYFAAR WAVA . . . G . QRLGIPQ  
UniRef100\_A0A2N1SEJ3 . . . . . . RAIES . . . AITQNMVGNVSGMICDGA KAD CALKIYSC THAAMQAAI MASH . . . G . MRVQKT D  
UniRef100\_A0A2N1TGG1 . . . . . . V . RHMA S . . . AITKNLVSD LAGVICDGA KAA CSLKLATAAGTAVQSAAL FSLH . . . G . VGVQPT D  
UniRef100\_A0A2N2A6Z6 . . . . . GG . Y . DGV AH . . . TVVNALAI ISGMVCDGA KAS CAAKIAVAVDA GILGYR MYTQ . . . K . KEFLSGD  
UniRef100\_A0A2N2B390 . . . . . L . HOI FS . . . TIKNVI GDSGMICDGA KTG CALKVATVVESAFNATL LSLN . . . N . VOISKN D  
UniRef100\_A0A2N2CTS9 . . . . . GD . Y . EAV SH . . . TVVNALAV VSGIVCDGA KAS CAAKIAMA VDA GILGYS MYQN . . . G . QQFFSGD  
UniRef100\_A0A2N2DQV4 . . . . . AD . Y . NII AH . . . TVVNALAI ASGVICDGA KAS CAAKIATAVDA GILVGYH MYLE . . . G . EEFLGG D  
UniRef100\_A0A2N2EHW0 . . . . . L . HOI FS . . . TIKNVI GDSGMICDGA KTG CALKVATVVESAFNAML LSLN . . . N . MQISKD D  
UniRef100\_A0A2N2EP56 . . . . . . DARK TAL . . . AVNTVISDI GGMICDGA KSG CALKVASADSATRAAW MASN . . . G . EGITDAE  
UniRef100\_A0A2N2FK02 . . . . . L . HHIA G . . . AIKILIED LAGVICDGA KAG CALKLATAAGTAVQAAAL FSLH . . . G . MRIRAT D  
UniRef100\_A0A2N2GVW3 . . . . . . DREMRKL . . . AVNNLISDL GMLCDGA KSG CALKVASSTDSATLAAAY MAIH . . . H . HGINES E  
UniRef100\_A0A2N2HC93 . . . . . . EMQKI GL . . . AVNNLISDL GMLCDGA KGG CALKVVSSTESAIRSAF MALN . . . D . YGIASIE  
UniRef100\_A0A2N2IF24 . . . . . L . AHI AG . . . AIKNIIED LAGVICDGA KAG CSLKLATAAGTAVQAAAL FSLQ . . . G . VNVMDT D  
UniRef100\_A0A2N2LGF6 . . . . . L . ROIE Y . . . AIKNMIGN TAGMVCDGA KEG CSLKVATNTSAAVQSAAL LALG . . . N . LCVSGN D  
UniRef100\_A0A2N2VX69 . . . . . Y . DOI CY . . . SIKNMI GNTGMVCDGA KYG CALKVAVSSAAVQSAI LAID . . . N . TCISDN D  
UniRef100\_A0A2N3IOV5 . . . . . F . LOI LGM . . . TLQNM TGSVTGMICDGA KYG CSHKIAASVSAATQSSL LAMN . . . H . NCLNGSN  
UniRef100\_A0A2N4UW80 . . . . . F . EOQ CS . . . ALQNCISDVAGMICDGA KAT CAMKVKSATCSACA AFL LAMH . . . D . QCASEQ  
UniRef100\_A0A2N5XTJ3 . . . . . K . EQSYH . . . AIMNVLSDTSGMVCDGA KAT CAMKVGSSSAAAVKAVM VAMK . . . G . NAPRQ  
UniRef100\_A0A2N6BTV4 . . . . . H . NHI AA . . . AIINLLGD LAGVICDGA KAS CSFKLATAAGSVAQAAAL FAIH . . . G . IRIAST D  
UniRef100\_A0A2N6D3G7 . . . . . A . NHI AG . . . AIINHTHDLAGVICDGA KAG CSLKLATAAGTAVTASL LSLQ . . . G . VVVQAT D  
UniRef100\_A0A2N6D977 . . . . . A . NHI AG . . . AIINHTHDLAGVICDGA KAG CSLKLATAAGTAVTASL LSLQ . . . G . VVVQPT D  
UniRef100\_A0A2N6EIM4 . . . . . GR . F . EEI AH . . . TIVNALAT VSGIICDGA KPS CAAKIAASVDA GILGFL MYQN . . . G . QQFYDGD  
UniRef100\_A0A2N8ZD70 . . . . . F . QOI ISD . . . AICSMIGDI SGMICDGA KTG CAMKVSSSAGA AVKACL MAID . . . G . IRVTGNE  
UniRef100\_A0A2N8ZKM0 . . . . . F . EOQ CS . . . AIKNVLSDTSGMVCDGA KST CAMKVGSSSQAAMKGM L LALN . . . N . QSIDDQ  
UniRef100\_A0A2P1TWB1 . . . . . . KEI EN . . . TIKNMA SNTGMICTGNSA CSLKANTGVKAAFLSAK MAIK . . . N . IVIPNKC  
UniRef100\_A0A2P2BMT9 . . . . . ROIEG . . . AIENMVAN LSGMICDGA KAG CALKLASAASAVQSAI IAKQ . . . G . CFVPPMN  
UniRef100\_A0A2P2FC67 . . . . . GE . QERI . Y . QIL CD . . . TITNSIET LGGMVCDGA KAS CAAKIAGLAVENAIMALE LSLA . . . G . NVFPGE  
UniRef100\_A0A2P2FDS6 . . . . . GG . Y . EAK KH . . . TIVNALAI VSGMICDGA KAS CAAKIATAVESGIFGYE MYCN . . . G . QQFYGGD  
UniRef100\_A0A2P2FE08 . . . . . GR . K . KEI AD . . . TITNALAT DAVICDGA KSS CAAKIASAILEASLGWH MAKA . . . G . RVFSGGD  
UniRef100\_A0A2P5GLH4 . . . . . Y . ETI AM . . . AIGNMIGDVSGMICDGA SNS CAMKVSTSAASAWKAVL MAID . . . N . TAVTGN E  
UniRef100\_A0A2P7Q289 . . . . . DHISG . . . AVRNAVAD LSGMICDGA KSG CAIKLSSAASAVRNAL LAKN . . . G . NYAKTVN  
UniRef100\_A0A2P8EH31 . . . . . GD . Y . RRI SY . . . TITNTLGN VGGIVCDGA KPS CAAKIASVHAAILAYQ MSM . . . RD . QCFKPG E  
UniRef100\_A0A2S0L2V7 . . . . . EAMFR . . . CLNNMA SSI TGMICDGNHSG CVMKGITSADTAFRSKD FAMA . . . G . TCIENTH  
UniRef100\_A0A2S2CIK9 . . . . . F . POI SS . . . AICSMIGDIAGIICDGA KTS CAMKVSSSASA AVKAAAL MAID . . . G . TRVTGNE  
UniRef100\_A0A2S4QN42 . . . . . Y . DTL AS . . . AISSMIGDVSGMICDGA SNS CAMKVSTSVSSAWKAVL MAID . . . E . TAVTGK E  
UniRef100\_A0A2S4WWF9 . . . . . Y . KAI VM . . . AISSMIGDVSGMICDGA SNS CAMKVSTSVGS AWKAVL MAID . . . D . SAVTGN E  
UniRef100\_A0A2S6HY69 . . . . . GQ . R . EOI EN . . . TIINTLAN TSGIVCDGA SAS CAAKIASVDAAIMGYS LSMN . . . G . HVFLPG D  
UniRef100\_A0A2TOBJ09 . . . . . GS . Y . KEI AH . . . TIVNALAI VSGIVCDGA KAS CAAKIATAVDA GILGYN MYKE . . . G . QQFKAG D  
UniRef100\_A0A2TOBN70 . . . . . L . SOI KG . . . AITKNM IAGSGMICDGA KIG CSYKLATS VNAAILDAAN MANK . . . N . IFIPSG D  
UniRef100\_A0A2T2XZM9 . . . . . P . DVINA . . . AITNMVSDITGMICDGA KAS CAMKVSSVSSAWKAVL MAMQ . . . N . SCASAND  
UniRef100\_A0A2T3IZB3 . . . . . F . SHITS . . . AICSMIGDI TGIICDGA KTS CAMKVSSSASA AIIKAAAL MAID . . . G . TRVTGNE  
UniRef100\_A0A2T3JYD2 . . . . . F . EKI CF . . . AIQNTLSDITGMFCDGA KST CAMKVKSSTSSAVMSSL MAID . . . N . HEADQN E  
UniRef100\_A0A2T3LD16 . . . . . L . NKI NN . . . AICSMIGDIAGIICDGA KTS CAMKVSSSAGSAVKSAAL MAID . . . G . IHTVTNE  
UniRef100\_A0A2T3LKN5 . . . . . F . EOM CS . . . AIQNTLSDITGMICDGA KST CAMKVKSSTNSAVMSFL MAIE . . . N . HEAQSQ  
UniRef100\_A0A2T3N3A2 . . . . . F . DKISN . . . AICSMIGDIAGIICDGA KAS CAMKVSSSAGA AVKAAAL MAID . . . G . TRVTGNE  
UniRef100\_A0A2T3NLR8 . . . . . F . SHISN . . . AICSMIGDI TGIICDGA KTS CAMKVSSSASA AIIKAAAL MAID . . . G . TRVTGNE  
UniRef100\_A0A2T3P069 . . . . . F . KOV SS . . . AICSMIGDI TGIICDGA KTS CAMKVSSSASA AIIKAAAL MAID . . . G . TRVTGCE  
UniRef100\_A0A2T4T7G6 . . . . . Y . AHV CH . . . AVKNMIAN LTGMICDGA KPS CALKISSG SVSTAILLSAL LAME . . . G . KHVTAAE  
UniRef100\_A0A2T5C8M1 . . . . . AN . Y . DIT AH . . . AIVNTLGN ISGMICDGA KPS CAMKIATGIYAFDAI LASL . . . H . KDLHGD  
UniRef100\_A0A2U1E4Q5 . . . . . ES . F . DII KN . . . TLTNTLAT TSGIVCDGA KSS CASKIATSVNASILAYE MAK . . . RG . RHRFRGE  
UniRef100\_A0A2U1FPB7 . . . . . K . EOI SF . . . AITKNM IAGTGMICDGA KPS CSMKVSSG SVSTAMFSAL MAIE . . . Q . KVVTSSE  
UniRef100\_A0A2U3BBY7 . . . . . Y . QOI SH . . . AISSMIGDIAGIICDGA KAS CAMKVSSSAGA AVKAAAL MAID . . . G . VYVTGNE  
UniRef100\_A0A2U8DPR2 . . . . . GD . Y . DTI GK . . . TIINAVGN VGGIVCDGA KAS CAAKISSVDA GILGYE MAK . . . HG . LVFPFGE  
UniRef100\_A0A2V1H4Z1 . . . . . L . PEVEN . . . AIFNMFGDVSGIIFCDGA KTG CSLKVSTASSAVKAAAL MAID . . . G . IRVTCNE  
UniRef100\_A0A2V2C3K4 . . . . . A . DCOVER . . . MLRTVLGN VGMVCDGA KSN CAAKAGMALHGAMQALA LAEA . . . G . LGADEEC  
UniRef100\_A0A2V2DF95 . . . . . GR . M . EEI AH . . . TLVNSIAI VSGIICDGA KPS CAGKIASVDA GILGYA MYRE . . . G . QQFYAE E  
UniRef100\_A0A2V2E3V3 . . . . . V . VOM KY . . . GINSMVADISGVVCDGA KPG CALKIATAVNSAITRAAT MAIN . . . N . LGADAH D  
UniRef100\_A0A2V2E4R8 . . . . . GR . M . EEI EH . . . TIVNSLGT VSGMVCDGA KPS CAAKIAMIESGVFGYR LFKN . . . G . NEFYAG D  
UniRef100\_A0A2V2EJ75 . . . . . AG . L . RTI GG . . . LITNTAAAI GGMVCDGA KPS CALKISAAALNAFDAYR LSRN . . . S . NICSPGD  
UniRef100\_A0A2V2ETK2 . . . . . GG . V . DEI SH . . . TIVNAIAIDSGMVCDGA KSS CAAKIACAVESGILGFE LYRA . . . G . QQFYGGD  
UniRef100\_A0A2V2FNF5 . . . . . AD . Y . DVI CH . . . TIVNALAI LSGMLCDGA KSS CAAKISAAVDA GILMGYT MYAS . . . G . QQFYGGD  
UniRef100\_A0A2V2FVB2 . . . . . GD . Y . EVI AH . . . TIVNALAI LSGMLCDGA KAS CAAKIATAVNNNLLGYR LYQQ . . . G . LQFYAG D  
UniRef100\_A0A2V2GMP9 . . . . . GG . T . EEI SH . . . TVVNVAIA SSGIICDGA KAS CAAKIISQAVEAGILGYE MYEQ . . . G . NQFYGGD  
UniRef100\_A0A2V4A5K8 . . . . . F . QOI LGM . . . TLKNMTGSVTGMICDGA KYG CSHKISASVSAATQSSL LAMN . . . H . NVLNGMN  
UniRef100\_A0A2V4E5P6 . . . . . GN . D . EOI EN . . . AIVNTLGT LSGMVCDGA KAS CAAKIAASVDAAITSEH MAML . . . N . NALHDGD  
UniRef100\_A0A2X2T0J3 . . . . . Y . DTI AK . . . AISSMIGDVSGMICDGA SNS CAMKVSTSATSAWKAVL MAID . . . N . TAVTGN E  
UniRef100\_A0A2X4V7P6 . . . . . Y . QTI SM . . . AISSMIGDVSGMICDGA SNS CAMKVSTSATSSAWKAVL MAID . . . G . SAVTGT D  
UniRef100\_A0A2Z4U933 . . . . . Y . EOM CH . . . TVSTMVADISGVVCDGA KPG CALKIATAVESAVRAAN MALN . . . G . KQAGGG D  
UniRef100\_A0A2Z4UBV8 . . . . . GG . Y . EEI SH . . . TIVNALAINSGVVCDGA KAS CAAKIASAVEAGVLGMK MYOF . . . G . SQFYGGD  
UniRef100\_A0A2Z4W8H1 . . . . . L . KKIKY . . . AITKNMAGN VGMICDGA KTG CALKVSTGVSAAMQSAAL LAMP . . . N . TEISCDD  
UniRef100\_A0A2Z5SEU7 . . . . . DMHKL DL . . . AVNTIISDI GMLCDGA KGG CALKVVSSTSDAIIIRAA Y MALN . . . G . HGISEEE  
UniRef100\_A0A2Z6AV01 . . . . . A . QHI AG . . . AITKNLTLD LAGVICDGA KAG CALKLATAAGSVQAAAL FAIQ . . . G . VNVDSGD  
UniRef100\_A0A2Z6IAJ8 . . . . . YD . D . RAIES . . . VITNALAITSGLICDGA KSS CAAKIAMVEGALVALD MVKN . . . E . QVFRGEG  
UniRef100\_A0A315QTM8 . . . . . DKIEE . . . AINNLI SDSLGMICDGA KGS CALKSLTAELALRHFD LIMQ . . . D . LNCHLPS  
UniRef100\_A0A315ZH44 . . . . . GT . V . ENVKH . . . AITNTLGN VSGVICDGA KAS CATKTIASGVYAAFDGAM LAQM . . . G . SVLQGED  
UniRef100\_A0A315ZYF5 . . . . . EMMAH . . . TLNNMA SSI TGMICDGNQOG CTMKGITAAVDAAYKSVE FAMN . . . G . YIDNVH  
UniRef100\_A0A315ZYI5 . . . . . G . GY . NEI AH . . . TVVNALAI VSGMVCDGA KAS CAAKIASAVDA GILGYD MYVR . . . G . QQFYGGD  
UniRef100\_A0A316D413 . . . . . I . KKM LC . . . AIDTMSINTTGVICDGA KES CAFRVGIAAEHAYISAL MADK . . . E . LYVDNTQ  
UniRef100\_A0A316MK44 . . . . . E . DQMMG . . . AMRNILGSVSGMLCDGA KEG CATKLLIAANISVLSAL MAME . . . G . LCTSPAD  
UniRef100\_A0A316N270 . . . . . P . EOQ ER . . . AVTVLVA LSGMICDGA KET CSLKVATGCEAYSAAA LAIK . . . G . GGVHDVQ  
UniRef100\_A0A316NGF8 . . . . . EQVEV . . . AITNTIPSF VGVVCDGA KLA CALRISSGTGIALETSS LAIR . . . G . VRIANNQ  
UniRef100\_A0A316NJU4 . . . . . GS . Y . EDV CG . . . TITNTINTTGMVCDGA KSS CASKIATAVGMALLAMN MSGK . . . G . RVFKPGE  
UniRef100\_A0A316NQW2 . . . . . ASLDR . . . ACNNMA SSI TGMICTGNHNC CCLKVITAVDCAYNAAV LSV D . . . N . AAVAAPH  
UniRef100\_A0A316PL63 . . . . . GG . Y . EEI CG . . . TITNTLAT LSGMLCDGA KSS CAAKIATAVQTAILLAA MSAN . . . G . RRFRHGD  
UniRef100\_A0A316PQ13 . . . . . GD . Y . RAI AH . . . TIVNAVAILSGIICDGA KPS CAAKIASAVEAGILGY MYVN . . . D . QQFRGG D  
UniRef100\_A0A316PQC6 . . . . . E . ND . TVI KH . . . VIVNCLAITSGIICDGA KPS CAAKIASVDAAILLALA MAQH . . . K . QCFRAGE  
UniRef100\_A0A316QLU6 . . . . . GG . Y . SGV AH . . . TITNTLAITS GIVCDGA KAS CAAKIATAVDA GILGYD MYLH . . . G . QQFYNGD  
UniRef100\_A0A316R9D7 . . . . . L . SOI EN . . . VIQILIAN ISGLFCDGA KAS CSMKASVGI AAYEAYV IAVD . . . ND . IAAACD  
UniRef100\_A0A316RJH4 . . . . . KEI IGY . . . AVQNMAGN VVGMICDGA KAD CALKIISTCINA AVQAAAL MASQ . . . G . VRVAST D



UniRef100\_A0A316RT04 . . . . . L . PEIKC . . . AVNNMLATLQGMICDGAATCALKIAAGTNVAIMSSSTLALA . . . D . IQPSSMD  
UniRef100\_A0A316STM8 . . . . . Y . TQISY . . . AVKNMIANLTGMICDGAAPSCALKLSSGVSTAVLSAI . MAME . . . N . KFTVTSV  
UniRef100\_A0A318EHG9 . . . . . GK . E . EETQ . . . TLVNTLANVSGIVCDGAKSSCAAKIASAVDAATVATMISLR . . . G . KGFVAG  
UniRef100\_A0A329HK89 . . . . . Y . RTIAM . . . AIGSMIGDVSIGMICDGAANS . CAMKVSTSVASSAYRSVM . LAID . . . N . IRVGGD  
UniRef100\_A0A329TRM0 . . . . . GR . Y . NEIAH . . . TVVNALAINSGMVCDGAKASCAAKIASAVEAGLLGMQ . MQMH . . . D . SEFVGGD  
UniRef100\_A0A329TZB5 . . . . . G . DY . DAIVH . . . TVVNALAVSGVICDGAASCAAKIATAVEAGLLGYNMYIR . . . G . NFRAGD  
UniRef100\_A0A329U9Y1 . . . . . . . HEICC . . . AIQNMVGNVTGMVCDGAKAD . CALKISTCVNAACQAAA . MGTR . . . G . IRVQSTD  
UniRef100\_A0A344MMA6 . . . . . . . F . QDVQD . . . TISNMTGDHIGMVCDGAGNSCTLKVATACDAACRAVMSLSLH . . . N . IRVTGSD  
UniRef100\_A0A346AZS6 . . . . . H . AE . QTIISN . . . AICSMITGDAIGMVCDGAANS . CSMKVVTAVSSAYRSVM . LAID . . . N . IRVGGD  
UniRef100\_A0A346B2K8 . . . . . . . AVMER . . . VVANMAASITGMICDGGNQGCCTMKGVTAVDTAFRSVR . FALS . . . G . VGVDPVH  
UniRef100\_A0A347AH72 . . . . . . . REIES . . . ALQOLMANVTGIIICDGAAGSCALKISTCTFAAVQTAL . MALD . . . G . ISIDAKE  
UniRef100\_A0A347AJ71 . . . . . . . SEIRS . . . ALQIMLANLTGMICDGAAGSCALKIATCTYSAIQSAL . LAIN . . . G . VKIPTKE  
UniRef100\_A0A348NII3 . . . . . G . SR . MAIEA . . . TILTNLAIVTSGIICDGAAPSCAAKIATAVDAAILTASRLALA . . . Q . TDYLAN  
UniRef100\_A0A349G9B8 . . . . . . . IQMEG . . . AIQNMIANTTGMICDGAIVGCSLKLATASAAAIQSSSL . LAIG . . . N . VVVPSTGN  
UniRef100\_A0A349N0S4 . . . . . EN . G . DVIRG . . . TLNTLASLSGVVCDGAKPS . CAMKIGMAVGTGEIAYR . QAKS . . . G . NTFHAGD  
UniRef100\_A0A349P8R7 . . . . . . . NPKKATL . . . AVNTVISDITGMICDGAAGSC . CALKVAS . SCESATIRAAW . MASN . . . G . EGITEAE  
UniRef100\_A0A349SZM2 . . . . . GD . E . NVIAH . . . TIVNALAISSGIVCDGAKSSCAAKIAMAVETGIFGYE . MYME . . . G . QQFYGGD  
UniRef100\_A0A350BG08 . . . . . . . SAVEN . . . AASAVLATLTGMLCDGGKVG . CALKVNTAVSTAESAY . LALK . . . G . VSIPSTGN  
UniRef100\_A0A350IFD9 . . . . . . . Y . EEVCS . . . AIKNNMIGNITGMVCDGAKVGCAMKVAS . SVSSSVQSAV . LALQ . . . G . IHACETD  
UniRef100\_A0A350W0I4 . . . . . G . TI . KOIQK . . . TIDNTLANIPGIIICDGAIS . CAAKIAS . SLDAAMMGHY . LAMK . . . G . KAYEAT  
UniRef100\_A0A350X275 . . . . . G . TL . EOIEK . . . TIVNTLANVSGIVCDGAKIS . CAAKIAS . SIDATIMGHH . LAMR . . . D . VFVEDC  
UniRef100\_A0A351AS26 . . . . . . . Y . EOVCSS . . . AIKNNMIGNITGMVCDGAKVGCAMKVAS . GVACAVQSCV . LALR . . . G . TCIKETD  
UniRef100\_A0A351EDR8 . . . . . GG . L . KEIEH . . . TIVNSIAIDS . GMVCDGAKAS . CAAKIAS . AVDAGILGYH . MYKN . . . G . QQFRAGD  
UniRef100\_A0A351TJ1 . . . . . G . SL . AOIKA . . . TIDNTLANIPGIIICDGAIS . CAAKIAS . TIDAMMAHY . LAMQ . . . D . KOYAAYT  
UniRef100\_A0A351UIB2 . . . . . . . DPKKAAL . . . AVNTVISDITGMICDGAAGSC . CALKVAS . SADSATIRAAW . MASN . . . G . EGITEAE  
UniRef100\_A0A351UVB6 . . . . . G . GF . A . EVCA . . . AVKNMVANLTGMICDGAAPSC . CALKISS . GSVSTAMMSAM . LAMN . . . G . KCVTSTE  
UniRef100\_A0A351UVG4 . . . . . G . GF . EDVKH . . . TVVNALAIVSGIVCDGAKAS . CAAKIAS . AVDAGILGFE . MYRN . . . G . QQFFAGD  
UniRef100\_A0A351XYN7 . . . . . . . Y . DOITY . . . AIKNNMIAITGMICDGAAPSC . CALKIAS . GSVSTALSAL . MAIE . . . N . EVVSAQE  
UniRef100\_A0A352A5R7 . . . . . . . AOIQG . . . TVKNILANOS . GMVCDGAKPG . CALKLGT . AAASGVQSSL . LAME . . . G . YYACKNE  
UniRef100\_A0A352HTF0 . . . . . . . Y . POVCSS . . . AIKDMIANLAGMICDGAAPSC . CSMKISS . GSVYTAMLSAM . LAMN . . . G . KCVTQAE  
UniRef100\_A0A352NCV1 . . . . . . . E . IKAEM . . . AIKNNMIGDAVGMICDGAAGFS . CAIKVVSS . SVSSMYRAVR . LAQA . . . G . IVIPATN  
UniRef100\_A0A352P5R0 . . . . . GG . Y . EEVHS . . . TIVNALAIVSGIVCDGAKSS . CAAKIAS . IEAGILGYN . MYME . . . G . QQFFDGD  
UniRef100\_A0A352ZB45 . . . . . AS . Y . EOISA . . . VVIDSIATADGILCDGAKSS . CAAKIATALESAMLALE . LGMH . . . EG . RRFREDGE  
UniRef100\_A0A353BWM0 . . . . . . . KEIKS . . . AIQNNMLGTVTGMLCDGAAPG . CALKIAT . CTSATQSAL . IT . . . . .  
UniRef100\_A0A353E5G4 . . . . . Y . TRICN . . . SVKNMVANLTGMICDGAAPSC . CALKISS . GSVSTALSAL . LSME . . . G . KCVTSAE  
UniRef100\_A0A353JZW6 . . . . . . . YOIAG . . . TIKNNMVGNLAGMLCDGAAGG . CALKLST . ASSEATLSAE . LAKN . . . N . IISDFD  
UniRef100\_A0A353Q9I3 . . . . . Y . EOVCFF . . . AIKNNMIAITGMICDGAAPSC . CSMKISS . GSVYSAMLSAL . LAIK . . . H . VCVTSAE  
UniRef100\_A0A353RNY3 . . . . . Y . AOITF . . . AIKNNMIAITGMICDGAAPSC . CALKIAS . GSVSTASLSAL . MAIE . . . N . EVVTSQE  
UniRef100\_A0A353WQ7 . . . . . Y . KEVTY . . . AVKNMIAITGMICDGAAPSC . CAMKLTS . GSVSTAVLSAM . MAME . . . H . ECVSCVE  
UniRef100\_A0A354CV6 . . . . . GR . F . TEIAH . . . TIVNAVAINS . GMVCDGAKAS . CAAKIAS . AVEAGLLGMN . MYMH . . . G . REFYGGD  
UniRef100\_A0A354KVM3 . . . . . . . NHYIG . . . AIENMIAID . LSGMICDGAAG . CALKLSS . AASAVQSAV . IAKQ . . . G . YAVPPLN  
UniRef100\_A0A354WYR3 . . . . . K . QOITF . . . AIKNNMIAITGMICDGAAPSC . CAMKVAS . GSVYTAMLSAM . MAME . . . G . KCVTQAE  
UniRef100\_A0A354ZC21 . . . . . P . EOAVA . . . AMQIVLAETAGMVCDGAKES . CSLKVG . IGGAEAYTAAL . LAME . . . G . KGVSRPQ  
UniRef100\_A0A354ZK32 . . . . . V . DECTV . . . AMQTVLASTVGMICDGAADT . CSLRVGV . GATESYFAAL . LAMR . . . G . QGVTEAG  
UniRef100\_A0A355C672 . . . . . Y . ROVTF . . . AIKNNMIAITGMICDGAAPSC . CALKIAS . GTSTAYLSAL . MAIE . . . N . RVVTSQE  
UniRef100\_A0A355MAF9 . . . . . ED . L . NTVSN . . . AIINTLGTISGMICDGAAGS . CAMKIAT . GIYAFDGM . LAQN . . . N . KSLHGG  
UniRef100\_A0A355PSM2 . . . . . . . DAMKR . . . TINNMASSITGMICDGGNQGC . CAMKG . VVAVDAAYRSVD . MAMN . . . G . VYIVDVH  
UniRef100\_A0A355TQ25 . . . . . G . TL . EMLAA . . . TVDNTMANIPGILCDGAIVG . CAAKIAT . SLDAATMAHY . MAMN . . . D . SNYTAHT  
UniRef100\_A0A355UQR2 . . . . . . . DLCSIPY . . . AINNLPVSDIGMICDGAAGS . CAFKVVS . TSDAATIRAAV . LGIH . . . R . HGITRAE  
UniRef100\_A0A355YLJ0 . . . . . GD . Y . EEIAH . . . TIVNALAITS . GIIICDGAAS . CAAKIATAV . DAGIFGYD . MYLK . . . G . QQFYGGD  
UniRef100\_A0A356DEI2 . . . . . Y . DRVVN . . . TIKTMCNLTGMICDGAAGG . CALKVYS . GSAVQAAL . LSMR . . . G . I . RTNND  
UniRef100\_A0A356EFX8 . . . . . V . KHIAG . . . AIKNIIGDLAGVICDGAAGG . CAMKLST . AAGTQAAL . FSLR . . . G . ITIQSTD  
UniRef100\_A0A356EMW2 . . . . . . . DAEKTTL . . . AVNNVAGD . LGLICDGAAPG . CAMKTTT . AVDTAIRSGL . MAIE . . . G . FGLNVD  
UniRef100\_A0A357AH24 . . . . . G . DY . QAVIH . . . TVVNALAIVSGMVCDGAKAS . CAAKIAAAV . DAGILGY . MYTQ . . . N . QQFYGGD  
UniRef100\_A0A357AQ81 . . . . . . . EOVG . . . AVNNMLGDVAGMLCDGAKAN . CALKIST . CVNTAFQCAF . MALH . . . N . EVVKASD  
UniRef100\_A0A357T3R8 . . . . . . . EDMVN . . . AMHSVLGALAGVICDGAES . CAYKLST . ATATAIEYAY . LSTK . . . . . KKVIFPRGN  
UniRef100\_A0A357T8X2 . . . . . . . EAVSA . . . AIQNNMLGNITGMICDGAAGG . CALKVAT . TSTAACMSAT . LALS . . . G . IAGSQE  
UniRef100\_A0A357VEP0 . . . . . S . TPVTR . . . TLNLAGSLSGIICDGAAGS . CSLKVMV . GVTGLKTAL . LTIO . . . G . LTASPS .  
UniRef100\_A0A357YNR7 . . . . . Y . DOITY . . . SAKNNMIAITGMICDGAAPSC . CALKIAS . GSVSTALSAL . MAIE . . . D . EVVTSQE  
UniRef100\_A0A358LAD3 . . . . . . . NOIAG . . . AVNSMSGTLAGMLCDGAAGG . CAFKLTA . AGEAVCMAL . LAKK . . . N . VFHKNQ  
UniRef100\_A0A358LYG4 . . . . . Y . AQAAA . . . AVKNMIAITGMICDGAAPSC . CAMKLTS . GSVSTAVLSAL . MAMD . . . G . HCVTPVE  
UniRef100\_A0A358NGP3 . . . . . I . NOIKG . . . SINNMVAGISGMLCDGAAGL . CSYKLS . ISVDAVDAE . MALK . . . N . IFIPDDN  
UniRef100\_A0A358S9Q9 . . . . . . . KEIHG . . . AIQNNMLGNVTGMICDGAAGG . CALKVAT . TSTAACMSST . LALS . . . G . IAGCGE  
UniRef100\_A0A359ICG5 . . . . . F . AOVCA . . . AIKNNMIAITGMICDGAAPSC . CSMKISS . GSVSTVMSAM . LAMN . . . G . TCVSSGE  
UniRef100\_A0A366KDN2 . . . . . Y . DTA . . . AVNNMAGDAAGMVCDGAGG . CAMKVAT . ASSMYRSVN . LAIQ . . . G . VAIPASN  
UniRef100\_A0A367ZT42 . . . . . L . EAITA . . . AVNTMTGGITGIIICDGAAGG . CAIKLIT . AVDAQAAL . LAIH . . . G . CLPSTN  
UniRef100\_A0A369M9D2 . . . . . G . GY . KEACH . . . AVNNALSI . VAGMVCDGAKS . CAGKIAF . SVNAGLLGYV . MYRD . . . G . QQFYGGD  
UniRef100\_A0A369ZG2 . . . . . F . DAISM . . . AICSMIGDISGIIICDGAANS . CAMKVST . SVTSYKLSIL . MALD . . . N . TQVTGN  
UniRef100\_A0A369ZIP7 . . . . . F . ETVSM . . . AICSMIGDISGIIICDGAANS . CAMKVST . SVASGYKSVL . MAMD . . . E . THVTGNE  
UniRef100\_A0A370R191 . . . . . Y . EPVAM . . . AICSMIGDVSIGIIICDGAANS . CAMKVST . GASAAYKAVL . MALD . . . N . SCVTGNE  
UniRef100\_A0A371IV96 . . . . . . . ROIEG . . . STENMVANLTGMICDGAAGG . CALKIAS . AASAVQSAI . IAKQ . . . E . CYVPPMN  
UniRef100\_A0A371J0V2 . . . . . . . ROVEG . . . AMENIVAS . LSGMICDGAAGG . CALKIAS . AASAVQSAI . IAKQ . . . D . CFVPPLN  
UniRef100\_A0A371JG02 . . . . . AD . Y . DIIGK . . . TLINAI . GNVGIVCDGAKAS . CAAKISS . AVDAGILGYE . MAV . . . RN . LSFPPGE  
UniRef100\_A0A372MG44 . . . . . L . EEMDR . . . AFNTMVGNLTGIIICDGAAGT . CALKIYS . CVEANLIACN . LAFR . . . G . LSPGSES  
UniRef100\_A0A372SSJ3 . . . . . GN . Y . ENITH . . . TIVNALAITS . GMIICDGAAPSC . CAAKIAS . AVDAGIMGY . MYQC . . . G . KQFYCGE  
UniRef100\_A0A372V216 . . . . . . . EAAILG . . . STQNALG . . . IGMICDGAAGG . CAAKIAAA . AAVTAAY . LSTA . . . G . CHVAARD  
UniRef100\_A0A372V355 . . . . . GD . L . SAVAH . . . TLVNSLAIVSGMVCDGAKPS . CAAKIAC . AVNDSILGWQ . MYRN . . . G . KQFYGGD  
UniRef100\_A0A372WT61 . . . . . AD . E . AILGK . . . VINTLNCNVGIVCDGAKPS . CAAKIAAA . VNSAGLLGWA . IYQR . . . SG . YAFGAGQ  
UniRef100\_A0A373CKD1 . . . . . YP . Y . EVVCE . . . TITNTIATVGMVCDGAKSS . CAAKIST . ALQTAILGMK . MGLH . . . D . RAFQPG  
UniRef100\_A0A373HYW8 . . . . . AS . E . EVMNH . . . TIVNTLAITS . GIIICDGAAS . CAAKIAS . VVEAGILGYD . MYMN . . . G . QQFYGGD  
UniRef100\_A0A373NH16 . . . . . GD . Y . KVI . . . TIVNSLAIVSGIICDGAAS . CAAKIAS . AVDAGIMGYE . MYIQ . . . G . QQFYGGD  
UniRef100\_A0A373U4P5 . . . . . Y . DNAMVN . . . TIKTMCNLTGMICDGAAGG . CALKVYS . GSAVQAAL . LSMR . . . G . I . KTNND  
UniRef100\_A0A374A8C6 . . . . . Y . GQAAA . . . AVKNMIAITGMICDGAAPSC . CAMKLTS . GSVSTAVLSAM . MAMD . . . G . HCVTPVE  
UniRef100\_A0A374NZP7 . . . . . V . DAVER . . . AAKNMAGS . VGIICDGS . LG . CAWKILG . LSV . DWSIKSAL . MAIN . . . E . CCIHQG .  
UniRef100\_A0A374P0I3 . . . . . QK . V . EVVER . . . MITNHLGTISGMVCDGAKES . CASKIAF . SALFSA . MLYGE . MAKE . . . N . TVFRNGC  
UniRef100\_A0A374PBN0 . . . . . G . TL . EOIKN . . . TIGNVLANIPGIIICDGAAGT . CAAKIAT . SLDAATMAHY . LAMN . . . G . RAYQADS  
UniRef100\_A0A377H098 . . . . . LS . L . EQIGY . . . AIE . TTTLGTMSGIVCDGAKS . CATKIAA . ISAFDSY . AASK . . . N . RKFEFG  
UniRef100\_A0A377LUR8 . . . . . Y . QTIAM . . . AICSMIGDVSIGMICDGAANS . CAMKVST . TORQCCLES . . . . . GD  
UniRef100\_A0A379DRQ6 . . . . . GT . D . EOIQY . . . AVINTLGTLSGMICDGAAPSC . CASKIAT . CIDTATSCHE . MAMR . . . N . RVLNDGE  
UniRef100\_A0A380TN06 . . . . . F . ESTISM . . . AICSMIGDISGIIICDGAANS . CAMKVST . SVNAGLLGYV . MALD . . . N . TQVTGNE  
UniRef100\_A0A380WY28 . . . . . . . EEIAG . . . ACTNIFANITGMICDGAAGS . CSMKISS . STAESITAAV . LAIN . . . G . VVSQANV  
UniRef100\_A0A381J8Z7 . . . . . Y . E . AISY . . . AVKNMVAGLSGMICDGAAGG . CALKIST . SVSSAIQSAV . LATN . . . G . IEVSCKD  
UniRef100\_A0A381J983 . . . . . I . KNIKY . . . AIKNNMIGNISGMICDGAAGT . CSLKIAT . GINAAIQCAT . LALK . . . D . VEPKESQ  
UniRef100\_A0A386H461 . . . . . I . EOIEG . . . DIKNNMAGS . GMIICDGAAGG . CSYKIAS . V . GAAIDAAK . MAMK . . . N . IFIPDR  
UniRef100\_A0A389NM166 . . . . . GT . L . REIEE . . . TVQNIIGDISGVFCDGAKV . CATKIAS . IDAFQAHY . LVK . . . DN . MNMSDM  
UniRef100\_A0A395YH27 . . . . . D . EOIGW . . . ATRNMTGS . IAGMICDGGKTG . CALKLSA . MTGTSIAL . LAVN . . . G . VGLRPTD  
UniRef100\_A0A395YJK7 . . . . . GD . Y . DAISK . . . IITNTVANAGGIVCDGAKES . CACKIAF . LEAFMAYE . MSL . . . EG . HVFPGE  
UniRef100\_A0A396KX23 . . . . . GD . Y . SRVCH . . . TIVNTLAITS . GIIICDGAAPSC . CAAKIAS . AVDAGIMGY . MAKE . . . N . KEFYCGE  
UniRef100\_A0A396Q5W0 . . . . . G . GY . KEV . . . TVVNALAIVSGIVCDGAKS . CAAKIAS . AVDAGILGYN . MYIR . . . G . QQFYGGD  
UniRef100\_A0A398CVJ7 . . . . . . . T . MEMLG . . . AMNMV . . . ISGVVCDGAAGG . CSLKVAL . ASGWAVESAL . LAAS . . . G . AIVPSCD  
UniRef100\_A0A398D866 . . . . . . . ROIRA . . . AIQNNMLGT . VGMICDGAAGG . CAMKVAT . VFAAMQSAI . LAIE . . . G . MSISPIE  
UniRef100\_A0A399TA84 . . . . . GG . F . KEVAH . . . TIVNALAIVSGIVCDGAKS . CAGKIA . TAVEAGILGYH . MYKN . . . G . QQFYGGD  
UniRef100\_A0A3A4ZUG3 . . . . . . . DLDRK . . . ITL . . . AVNTLVSD . LGMLCDGAAGG . CALKVVS . STDSATIRAAV . MAIN . . . G . HGITAE



UniRef100\_A0A3A5R7E4 . . . . . NGD.A..RKMAK...TVTNTLANVGGILCDGAKPSCAAKIASLSQAALMAHA.MSM...KD.RVFKGGE  
UniRef100\_A0A3A6NWZ1 . . . . . I.KHMAG...AIMNLIQDLAAGVVDGAKAGCAIKLATAAGTAVQASL.FALQ...G.VTVQPTD  
UniRef100\_A0A3A6QCRC . . . . . F.EIISA...SICSMIGDLAGIICDGAITS CAMKVSSAGTAVKSCAL.MAID...G.IRVTGN  
UniRef100\_A0A3A8U1P1 . . . . . D.EIIGN...AITNMSGNLTGMICDGGKIGCALKLATATNAAMMCAS.LAMS...D.VVLQPTD  
UniRef100\_A0A3A8UIV9 . . . . . GD.Y..ATVAH...TLVNALAI VSGIICDGAKPS CAGKIAA V DAGILGYQ.MYVN...G..QQFRGGD  
UniRef100\_A0A3A8UPV0 . . . . . GG.Y..AEVHAH...TIVNALAI VSGIVCDGAKASCAAKIASAVEAGILFGYA.MYRQ...G..QQFRGGD  
UniRef100\_A0A3A8Z6E7 . . . . . G..GY..EEVIH...TIVNALAI VSGMICDGAKAS CAGKIAA IDAGVLGYR.MYQN...G..QQFYGGD  
UniRef100\_A0A3A9AN50 . . . . . GD.Y..EAVSR...TITNTIANMGVVVDGAKSSCAAKIASVDAAIMAYM.LEN...AD.HCFKPGD  
UniRef100\_A0A3A9BHR1 . . . . . G..GF..KEIVH...TIVNSLAI VSGIVCDGAKASCAAKIAA V DAGLLGYN.MYLR...G..QQFYGGD  
UniRef100\_A0A3A9BSG2 . . . . . D.AQIIGN...AVINMSGNLTGMVCDGGKIGCALKLATATNAAMMCAY.LAVS...D.VVLQGT  
UniRef100\_A0A3A9CYB0 . . . . . KD..L..KVINH...TIVNALAI VSGIVCDGAKASCAAKIAMAVEAGILGFE.MYOE...G..NQFKGGD  
UniRef100\_A0A3A9EDE3 . . . . . GD.Y..KTIHAH...TIVNALAI VSGIICDGAKPS CAGKIAA V DAGILGYQ.MYMN...G..QQFKGGD  
UniRef100\_A0A3A9EDL9 . . . . . G..GY..KEIVH...TIVNALAI VSGIVCDGAKASCAAKIASV DAGLLGYN.MYKR...G..QQFYGGD  
UniRef100\_A0A3A9ELN6 . . . . . GS.F..AAIAH...TIVNAVAI VSGIICDGAKPSCAAKIAA V DAGILGYH.MYLA...S.QEFKSGD  
UniRef100\_A0A3A9FPZ7 . . . . . GS.Y..EATIAH...TIVNAVAI VSGIICDGAKPSCAAKIAA V DAGILGYD.MYRN...Q.QEFKGGD  
UniRef100\_A0A3A9FW91 . . . . . GG.L..EDVSN...TIVNTIANVGGIVCDGAKSSCAAKIASVDAAIMACC.MTE...NS.KTFRSGE  
UniRef100\_A0A3A9HQU2 . . . . . .KEVDG...AIRNVVGSVFGILCDGAKHGCALKLISMSSGVATESSY.MAMN...G..HFVKGGD  
UniRef100\_A0A3B8RB37 . . . . . Y..A..QICD...AIKKNVANLTGMICDGAKPS CALKISSGVTTAMMSAM.LSMS...G..KCVTSAE  
UniRef100\_A0A3B8XA78 . . . . . Y..KEVCA...AIKKNMAGNITGMVCDGAKVGCAMKVASGVSCAVQSAV.LALR...G.TCIPSTD  
UniRef100\_A0A3B9ECG9 . . . . . V.SQIEA...QINNMVGMAGIICDGAKPS CAFKALMAVGLALDSAC.LSME...N.VRIPSGE  
UniRef100\_A0A3B9FAN4 . . . . . Y..ERACY...AAKNMIAI LTGMICDGAKPS CSLKISSGVSAVLSAT.MAME...G..RHSVTA  
UniRef100\_A0A3B9IBT1 . . . . . GS.Y..EQIGG...TITNTLGNVGGIVCDGAKPSCAAKIASVHAAILLGHY.MST...SQ.KEFMGGD  
UniRef100\_A0A3B9Q7L5 . . . . . LT..D..NAILG...VIRNALAI VSGILCDGAKSSCAAKISMAVEAGILLALD.MYKN...H..QTFKAGD  
UniRef100\_A0A3B9RT85 . . . . . LT..L..EIMDR...AINTMI GNLTG IICDGAKMT CSLKIYSCVEAANLACK.LAFR...G..YSPGNES  
UniRef100\_A0A3B9TS24 . . . . . F.EMAER...AVAVMIADLVGMICDGAKEITCALKVGTGAIEAYYAAK.LALR...G.G.LKPPQ  
UniRef100\_A0A3B9YD34 . . . . . DLKAIIGL...AINNVIISD IGMCLCDGAKSG CALKVVSSTDTAIRSAY.MGIH...R.YGITEVE  
UniRef100\_A0A3C0D3C1 . . . . . .HEVCC...TIQNMVGNITGMVCDGAKAD CALKISTGTGNAACQAA.MGVR...G.G.VRVQSTD  
UniRef100\_A0A3C0KX94 . . . . . DIERKTY...AIDNVIIDLCGIICDGAAGCSMKVITGAEAMRSASF.MALA...G.FGLSDD  
UniRef100\_A0A3C0NP20 . . . . . GR..F..ETIHAH...VIVNTVAVTSGIVCDGAKASCAAKIAA V DAGILLGLA.MVRD...G..NEFYGGD  
UniRef100\_A0A3C0SSE4 . . . . . .EOMKY...TINNMASSITGMICDGGNVGCVMKGIVAVDAAYRSLE.LAMN...N.YIEDIH  
UniRef100\_A0A3C1ELK2 . . . . . D.DIPGITL...AVNNVIISD LGMLCDGAKSG CALKVVSSTDSAIRSAY.MGIH...H.YGITSRE  
UniRef100\_A0A3C1F9S1 . . . . . .CVPVATL...AINNVIISD IGMCLCDGAKSG CALKVVSSTDAAIRSAY.MAIH...D.YGITEVE  
UniRef100\_A0A3C1Q9K3 . . . . . W.MHSAC...AMQLVLANTAGIVCDGAKGT CALRVGTAAECYLAAL.IAVN...D.SGINDAQ  
UniRef100\_A0A3D0MPX6 . . . . . .EOVER...AINTVVGSITGGILCDGAKLGCAMKLANAVGTAMESAY.LAMN...N.TSIRSGD  
UniRef100\_A0A3D1D0D1 . . . . . Y..GRVCA...AIQNMVANLTGMICDGAKPS CSIKTCSGVSSALLSAL.LSMO...R.HCVTAAE  
UniRef100\_A0A3D1HKK1 . . . . . Y..EQISF...AVKNMIAI LTGMICDGAKPS CALKLITGVSTAVLSAM.FALQ...H..KYVTSVE  
UniRef100\_A0A3D1M5K9 . . . . . LG..L..PGIEA...AVSNLAVVSGMICDGAAGSSCAGKIAFVVEAGIMGK.QFLT...S..NSYKGGD  
UniRef100\_A0A3D1N2N5 . . . . . .NLKAAATL...AVNNLIISD LGGTLCDGAKSG CALKVASSSDSAIRSAY.MAIN...G.EGISELE  
UniRef100\_A0A3D1NE50 . . . . . GR..F..EEIAH...TIVNALAMTSGGIVCDGAKPSCAAKIALAVEAGILGFL.MFOH...G..QFYGGD  
UniRef100\_A0A3D1T396 . . . . . N.TQIEL...AVKTVLSSLAGMVCDDGAKSGCSLVKNNAAGEAFMASY.FALE...G..LGISTSQ  
UniRef100\_A0A3D1V9H2 . . . . . GQ..F..REIAH...TIVNAIAIDSGMICDGAAGSSCAAKIASAVEAGILGMQ.MQMH...E..SQFYGGD  
UniRef100\_A0A3D1WY02 . . . . . V.EAMDR...AVNTMVGNLTG IICDGAAGT CALKIYSSVEAAATSSR.LALK...G..TSPSDES  
UniRef100\_A0A3D1X7S0 . . . . . GR..Y..DEIAH...TIVNALAINSGMLCDGAKASCAAKIASAVEAGILGLQ.MYRH...D..SQFYGGD  
UniRef100\_A0A3D2BIJ5 . . . . . Y..EPIAM...AISSMIGD ISGVICDGAASNCAMKVSTGASAAYKAVL.MALD...N..TYVTGND  
UniRef100\_A0A3D2GB33 . . . . . T..YKLNK...AINNVLATLFGMTCDGAKRS CALKASIGTQMAIDSA.LSLK...N..VNVPCGN  
UniRef100\_A0A3D2GZC8 . . . . . E.GEMVQ...AARNLIGSVSGMICDGAKEGCASKVALSAGLVAEAC.LALE...G.G.GIHAQD  
UniRef100\_A0A3D2I8K7 . . . . . AD..C..EGISH...TLENVAMISGCIICDGAAGSSCASKIAMGVSCGILGYD.MYAG...G..GNFRPGD  
UniRef100\_A0A3D2KM10 . . . . . .EEVES...AVQLAAGGLFAMVCDGAKSG CALKIGEGAAVAVNAGR.LARL...GGS.IPVGE  
UniRef100\_A0A3D2ND9A . . . . . F..TRVCH...AVQNMIANLTGMICDGAKPS CSIKICSGVSSALLSAL.LSME...G..EHSVTA  
UniRef100\_A0A3D2P0A7 . . . . . .DQVVG...AINNMVGAISGMVCDGAKGGCAYKLSTAASEAVIQAY.LAVN...G.VVISKLD  
UniRef100\_A0A3D2SHK3 . . . . . F..PQVAS...AVQNMIANLTGMICDGAKPS CALKVASGVSTAVLSAM.MAME...N..RCVTSVE  
UniRef100\_A0A3D2W3X1 . . . . . GN..E..KDI SH...TIVNALAI VSGIVCDGAKSSCAAKIATAVETGIFGYE.MYQN...G..QQFYGGD  
UniRef100\_A0A3D3CDZ3 . . . . . T..DKAKA...AVQA VVSNL LGMLCDGAKES CAFKVGTGAMEAYHAAV.MASR...G.VA.LEAQ  
UniRef100\_A0A3D3FT93 . . . . . GS..Y..EEICG...TITNTIANVGGMICDGAKPSCAAKIASVDAADAI MAWH.LSAE...G..KVFPGD  
UniRef100\_A0A3D3MPV7 . . . . . Y..EHICH...AVKNMIAI LTGMICDGAKPS CSLKISSGVSTALLSAL.LSME...G..KYVTSAE  
UniRef100\_A0A3D3QSD6 . . . . . V..EQIEA...SINNMIAGVSGMFCDDGAKIGCAAYKLAI SVDAAKDASS.MALS...G..IRIPSDN  
UniRef100\_A0A3D3RH36 . . . . . GT.Y..EQVCK...TITNTIANVGGIVCDGAKPSCAAKIASVVEAAILAHN.MSM...NS.CCFQAGE  
UniRef100\_A0A3D3TC14 . . . . . Y..EQICY...AVKNMIAI LTGMICDGAKPS CAMKVTSAGSTAVLSAM.LAME...Q..KCVTSVE  
UniRef100\_A0A3D3UQ13 . . . . . L.HHIAS...AIFKNLIGDLAGVICDGAAGCALKLATAAGTAVQASL.FSLH...G..KVNKESD  
UniRef100\_A0A3D3W8G7 . . . . . AD.Y..DVJGK...TIINALGNVGGIVCDGAKASCAAKISSV DAGIMGYE.MAK...RG.LVFPFGD  
UniRef100\_A0A3D4E8U0 . . . . . Y..EQVCA...AIKKNMIAI LTGMVCDGAKVGCALKVASGVVACVQSCV.LALR...G.TCISTED  
UniRef100\_A0A3D4G5E1 . . . . . AD..Y..EGICH...TITNAAAMISGCIICDGAAGSSCASKIAMGVETGILGYN.MYLR...G.NSFQPGD  
UniRef100\_A0A3D4LM30 . . . . . N..E..QIKG...SINNMIAGISGMCLCDGAKLGCAYKLISVDAVDAAK.MALE...K..IYIPEDN  
UniRef100\_A0A3D4MUG6 . . . . . GD.Y..DAVAH...TIVNAVAI VSGIICDGAAGSSCAAKIAA V DAGIMGYR.MYIH...H..REFRHEG  
UniRef100\_A0A3D4QA04 . . . . . GD.Y..PHIGR...TITNTIANVGGIVCDGAKPSCAAKIAA V HAAILLGHY.MSV...SD.KQFKAGE  
UniRef100\_A0A3D4XHK1 . . . . . Y..DQICY...SINKNMIGNITGMVCDGAKVGCALKVASGVSSAVQSAI.LALD...N.TCISDN  
UniRef100\_A0A3D4ZGW0 . . . . . L..VEMDR...AFNTMVGNLTG IICDGAKMT CALKIYSCVEAANLACK.LAIR...G..YSPGNES  
UniRef100\_A0A3D5MNT0 . . . . . .EEVES...AVQLAAGGLFAMVCDGAKSG CALKIGEGA VAVGTAGR.LARL...GGF.IPVGE  
UniRef100\_A0A3D5NPE1 . . . . . .KEILG...AIONNMLGNVTGMLCDGAKGG CALKVATCTSAASLSSS.LAMN...G..TAIGSTE  
UniRef100\_A0A3D5PD50 . . . . . GG.Y..SEIAH...TIVNALAVCSGMICDGAKPSCAAKIAVAVEAGILGYA.MSLN...G..KEFLDGE  
UniRef100\_A0A3D5TF23 . . . . . AG.Y..DGISR...TICNAVAMISGCIICDGAAGSSCASKIAMAGTGLGYN.MYLG...G..GNFRPGD  
UniRef100\_A0A3D5U8T4 . . . . . Y..HKVEY...AIKKNMIGNTAGMVCDDGAKGCSLKVATNTSAAVQSAI.LAHM...G..KCIASND  
UniRef100\_A0A3D5UCW1 . . . . . T..EQIKG...SINNMVAGISGMCLCDGAKLGCAYKLISVDAVADASE.MALK...N..IFIPDDN  
UniRef100\_A0A3D5YS30 . . . . . FS..Y..TIIAN...AIINTLAGVSGILCDGANSSCAVKIANGTYAAYDIA.MAAN...G..NVITAGD  
UniRef100\_A0A3D6BI84 . . . . . GS..Y..EAVSA...TITNTLGMISGTVCDGAKPSCAAKIASAVEAGILGFD.LYEK...G..KALHGGD  
UniRef100\_A0A3D8J5V0 . . . . . F..EVISR...GICNMIGD ISGILCDGAKSSCSMKVSTTVQSAFKSLL.LALE...K..SRVSGKE  
UniRef100\_A0A3D9A061 . . . . . Y..DTAAA...AINNMGDAPGMVCDGAGCA CAMKVATAVSSMYRAVN.LALQ...G..IQIPASN  
UniRef100\_A0A3E2ND12 . . . . . GG.Y..EEVIH...TIVNALAI VSGIVCDGAKASCAAKIASVIEAGIFGYS.MYSQ...G..QQFLDGD  
UniRef100\_A0A3E2TUT9 . . . . . GT.Y..EDI SA...TIVNTIGNVGGIVCDGAKSSCAAKIASVDAADAILGHF.LGR...KH.HWFQPGD  
UniRef100\_A0A3E2UCE9 . . . . . .HEICC...AIQNMVGNVTGMVCDGAKAD CALKISTCVNAACQAAA.MGTR...G.G.VRVQSTD  
UniRef100\_A0A3E2VXF0 . . . . . GD.Y..DHI CH...AIVNALAI VSGMICDGAKPSCAAKIASV DAGIMGCM.MYQR...G..KQFYRGE  
UniRef100\_A0A3E3DCN8 . . . . . AD..F..KAIAH...TIVNSLAI VSGIVCDGAKPSCAAKIAA V DAGILGYS.MYLN...G..QQFYGGD  
UniRef100\_A0A3E3DHD3 . . . . . M..EDIKS...AIRNMIAI VSGIICDGAAGCALKKTGTVSSGAFQCSM.LALN...K..KSAGNLD  
UniRef100\_A0A3E3E7L6 . . . . . GD..L..HAISH...TIVNGIAMISGTVCDGAKPSCAAKIASALEAGILGYE.MYKN...G..QQFKDGE  
UniRef100\_A0A3E3E836 . . . . . .EQIDH...VIRNMASSITGMICDGGNHGCVMKGMAAVDAIFESAQ.LAMA...D.VSIESVH  
UniRef100\_A0A3E4F607 . . . . . G..GY..EEVIH...TIVNALAI VSGMVCDDGAKASCAAKIAA V DAGILGYN.MYQL...G..QQFYAGD  
UniRef100\_A0A3E4GUD7 . . . . . GH.A..YEI SH...VIVNAVAI VSGVCDGAKASCAAKIASAVEAGILLGLQ.MQKN...G..KQFYGGD  
UniRef100\_A0A3E5BSB1 . . . . . Y..EQVSY...AIVQNMIANLTGMICDGAKPS CALKVITGVSTAVLSAI.MAME...N..RCVTSVE  
UniRef100\_A0A3G9GU85 . . . . . GG.Y..DEVSH...TIVNSLAI VSGIICDGAAGSSCAAKIATAIDAGILGYH.MYKE...G..QQFYGGD  
UniRef100\_A0A3G9JP81 . . . . . G..DY..KTI TH...TIVNSLAI VSGMICDGAAGSSCAAKIASVDAAMLGYE.MYKO...G..QQFKGGD  
UniRef100\_A0A3N0IVE1 . . . . . G..GY..EDAIH...AVVNALSIAGMVCDDGAKPS CAGKIAFVSNAGIMGYV.MYRD...G..QQFYGGD  
UniRef100\_A0A3N1WC8R . . . . . L..DTISM...AINSMVGDVSGIICDGAANS CAMKVSTGASASAILKAVL.MALD...S..TAVTGER  
UniRef100\_A0A3N1YL98 . . . . . R..ETSKK...AVKHVIQNIISTLLCDGGKMA CSLKVLQGA SVGYDSAK.FVLN...S..A.MQVYED  
UniRef100\_A0A3N2DXY3 . . . . . F..AQSCS...AIQNVLSDCSGMVCDGAKST CAMKVKTSTRSAFMSLL.LAMN...S..IEAHQD  
UniRef100\_A0A3N2KSY6 . . . . . F..SEVCS...AIVKNVANLTGMICDGAAGSSCALKISSGVSTAMMSAM.LAMN...G..KCVSSAE  
UniRef100\_A0A3N2MDS5 . . . . . Y..DEICA...SVKNMIAI LTGMICDGAKPS CSLKISSGVSTAMMSAM.LAMN...G..KCVTEAE  
UniRef100\_A0A3N2N806 . . . . . F..NEICA...AIVKNVANLTGMICDGAAGSSCAMKISSGVSTAMMSAM.LAIN...G..KCVTASE  
UniRef100\_A0A3N5KH61 . . . . . DLKGIGL...AVNTLISD LGMLCDGAKGG CALKVVSSTDAAIRSAY.MAIN...G..HGITAVE  
UniRef100\_A0A3N5LTA0 . . . . . V.LDIAN...AIFKNLSD LAGVICDGAAGCALKLATAAGTAVQAA.FSLQ...G..VRVHHRD  
UniRef100\_A0A3N5Z0J3 . . . . . DLEKVN...AIVNTLVSD LGMLCDGAKAG CALKVVSSTESAIRSAY.MALN...G.G.HGITEE  
UniRef100\_A0A3N6MSR7 . . . . . F..GVLER...AIVSNMGDI VSGIICDGAANT CAMKVSTATTSAFYSVL.LALQ...R..TRAGSGD  
UniRef100\_A0A3N9QP67 . . . . . E..ESVNM...AICSMVGD LAGMICDGAANS CAMKVSTTASAYKYSVL.MARD...D..SRVTGHE  
UniRef100\_A0A3P1Y7P1 . . . . . D.HQAQK...AMELVMGNI VGMVCDGAKES CALKVGTGATEAFYAAK.IALS...D..GGMEVSG

UniRef100\_A0A3P1ZCK5 . . . . . Y . DHVAA . . . AVKNMIANLTGMICDGAKPS CALKLTS GVSTAVLSAM. LAMQ . . . G . ECVSSVE  
UniRef100\_A0A3P1ZVF1 . . . . . NQLAG . . . VINSMSTL LAGMLCDGAKGG CAFKLTA TASEAVLICAL. LASQ . . . N . THVGYGQ  
UniRef100\_A0A3P3R193 . . . . . G . SL . EAVEH . . . TVVNTLAI VSGIMCDGAKES CAAKIAS SVDAATMGLS. MYRD . . . G . QAFHGGD  
UniRef100\_A0A3Q9B6K4 . . . . . KBI . EKEIEG . . . AAQNMLANITGMICDGAKES CSLKLTSTAGEAVIYASY. MAYN . . . N . VIIPLKV  
UniRef100\_A0A3R5WWV7 . . . . . G . GF . EEVTH . . . TVVNALAITSGVICDGAKAS CAAKIAS AVNDAAGILGYN. MYIR . . . G . QOFYAGD  
UniRef100\_A0A3R5Z781 . . . . . HAMAR . . . TINNMSSSITGMICHGNGKGTCTMKGIVAVNAAFQSDAF. FAMH . . . E . YIDEIH  
UniRef100\_A0A3R5Z241 . . . . . N . EOTGY . . . AVRNMTGTVTGMLCDGGKVG CSMKVAT GSTAAILMSAI. TAVY . . . D . AFLRASD  
UniRef100\_A0A3R6AZQ5 . . . . . GR . Y . EEIAH . . . TIVNSLAI VSGIICDGAKPS CAGKIAAS VDAAGILGYQ. MYED . . . G . RQFRGGD  
UniRef100\_A0A3R6J8M8 . . . . . AS . Y . DEVVH . . . TVINAVAI TSGMVCDDGAKAS CAAKIAE AVDAGITIGYY. MAKR . . . G . QNFDDGD  
UniRef100\_A0A3R6NDL9 . . . . . ACIDR . . . AINNTV VNF GVVCDDGAKLA CALKLSSAIGIATIECAM. MAKD . . . D . VMTPADQ  
UniRef100\_A0A3R6NZK5 . . . . . QOVEN . . . AIONTPNIFGVVCDDGAKLA CALRLSSGTGIGIEAAN. LALA . . . G . VRLANNQ  
UniRef100\_A0A3R6PRW7 . . . . . G . GY . EAVIH . . . TVVNALAI VSGVICDGAKAS CAAKIATAVEAGILGYN. MYIR . . . G . QQFRGGD  
UniRef100\_A0A3R6Q0J7 . . . . . G . GL . KEVEH . . . TVVNALAI VSGVICDGAKAS CAAKIAS AVDAGILGYN. MYIR . . . G . QQFRGGD  
UniRef100\_A0A3R6SQM7 . . . . . GD . Y . KVLIH . . . TVVNALAI VSGVICDGAKAS CAAKIATAVEAGIMGYD. MYMC . . . G . QEFHAGD  
UniRef100\_A0A3R6VXH6 . . . . . AD . F . DTHAE . . . TITNTLAN VSGIVCDGAKAS CAAKIAS SVNAAIMAYY. MAA . . . EH . RGFQSGE  
UniRef100\_A0A3S0AVY6 . . . . . FD . Y . DTTAK . . . AIINTLAG VSGVLCDGANSS CAVKIANGTYAAYDGA. MAAN . . . G . NVVTDGD  
UniRef100\_A0A3S0AXB5 . . . . . Y . TQAEI . . . AIKNMVGDAPGMICDGA GCS CAMKVGT SVSSMYRSVN. LAMQ . . . D . TAIPCSN  
UniRef100\_A0A3S6F254 . . . . . Y . DAVAM . . . AISSMIGD ISGIICDGAANS CAMKVST SVTAAYKAVL. MALD . . . H . SGVTGNE  
UniRef100\_A0A3S9GWJ1 . . . . . Y . EQAVL . . . AVKTLT LANTAGMVCDDGAKES CALKVGTAAFEAYLSAL. FALD . . . D . KGIDSAQ  
UniRef100\_A0A3S9PA89 . . . . . GD . V . RAIE . . . AIINTLGN VSGVICDGAKAS CATKIAS GYISAFDGM. LAQM . . . G . NVLQSED  
UniRef100\_A0A3T0I0D0 . . . . . G . IKA . . . AIONTIGN VSGMICDGAAG CAMKVST CSNVAVQSAL. LALN . . . H . QEIQSTD  
UniRef100\_A0A3T0L0Z0 . . . . . R . NTSKN . . . AVSYLIQT INGVICDGA KMG CSLKVMLGAQSSGYEAAV. FALD . . . N . KPVFSD  
UniRef100\_A0A401MOC1 . . . . . Y . NOVAF . . . AVQNMIANLTGMICDGA KPS CALKVTTGVSTAVLSAM. MAME . . . N . RYVTSVE  
UniRef100\_A0A401UQW0 . . . . . E . IDG . . . TIVNTLAN VSGMICDGA KEG CALKLSTASAVQSAL. LAIN . . . G . SI VPARN  
UniRef100\_A0A410DCK0 . . . . . GG . Y . EEIAH . . . TIVNALAITSGVICDGA KPS CAAKIASAVDAGILGYH. MYQN . . . K . QQFFGGD  
UniRef100\_A0A410PIL5 . . . . . CG . Y . KEIAH . . . TLVNAVAI VSGIICDGA KPS CAAKIATSV DAGILGY. MYKE . . . G . QQFRGGD  
UniRef100\_A0A410PZ62 . . . . . GD . Y . DAVAH . . . TLVNALAI VSGIICDGA KPS CAAKIATAVEAGILGFE. MYRN . . . E . KQFVNGD  
UniRef100\_A0A413CYD7 . . . . . K . E . IGY . . . AIKNMTGT VTMICDDGK VGG CSLKVTTGT VSAAILCAK. TAIN . . . N . APLKSDS  
UniRef100\_A0A413G3M3 . . . . . E . OMTH . . . TIVNMASITGMICDDG NQG CTMKGIVAVDAAFKSV. LAMN . . . G . TYIFDVH  
UniRef100\_A0A413G636 . . . . . F . DAIER . . . TVVNMIAITGMICDGA KAS CSLKVAAALQCCFNAVN. LAMS . . . G . IRVTSIQ  
UniRef100\_A0A413J6J2 . . . . . G . GY . AEVTH . . . TVVNALAITSGVICDGA KAS CAAKIAAAVDAAGILGYN. MYIR . . . G . QQFRAGD  
UniRef100\_A0A413JB40 . . . . . E . MMEH . . . TIVNMASITGMICDDG NQG CTMKGIAA VDAAYQSAE. LAMD . . . G . VYIDDVH  
UniRef100\_A0A413VL79 . . . . . E . OVQY . . . AFSNTFVNSF GVVCDDGAKQA CAMRLAVGTGVAVDAAR. LAMK . . . N . VHLPFNM  
UniRef100\_A0A413WGH3 . . . . . AD . L . DGIH . . . TLVNALAI VSGVVCDDGAKAS CAGKIALAVDNGILGYE. MYLE . . . G . QQFMGGD  
UniRef100\_A0A413XHM0 . . . . . GD . Y . KTHAH . . . TLVNLAI VSGIICDGA KPS CAGKIAAAVDAAGIMGY. MYLN . . . G . QQFMGGD  
UniRef100\_A0A414FT31 . . . . . Y . KQVAY . . . AVQNMIANLTGMICDGA KPS CALKLTS GVSTAVLSAI. LAME . . . G . KCVTSVE  
UniRef100\_A0A414G090 . . . . . GS . R . EOVGA . . . TIVNTLGN VSGVICDGA KAS CAAKIASAVDAAILGCD. MAQ . . . AG . RGFRAE  
UniRef100\_A0A414RYC9 . . . . . GG . Y . EEVTH . . . TVVNALAI VSGVICDGA KAS CAAKIASAVDAGILGYN. MYIR . . . G . QEFYGGD  
UniRef100\_A0A415E212 . . . . . K . TOI . . . AIKNMTGNITGMICDGA KPS CAMKVSSGVSTAMLSAL. MAME . . . N . KVVTSVE  
UniRef100\_A0A415EKW6 . . . . . MN . Y . EEISE . . . VITNSIATIGGMACDDGAKSS CAAKIAAAVECATVAIH. MARK . . . K . RAFKSGE  
UniRef100\_A0A415T4U2 . . . . . CT . Y . E . ICA . . . VFTNALAI VSGMICDGA KPS CAAKIATAVDAGIMGAQ. MYIR . . . G . KSFHSGE  
UniRef100\_A0A415XBZ7 . . . . . GD . Y . QHIGR . . . TITNTLAN VSGVICDGA KSS CAAKIAASVNAAILLAHY. MSM . . . SD . KQFQAGE  
UniRef100\_A0A415XE99 . . . . . E . DY . QAVIH . . . TIVNTLAN VSGVICDGA KAS CAAKIASAVDAAILGYH. MYKN . . . G . QEFKSGD  
UniRef100\_A0A415YM35 . . . . . D . QIAL . . . AVQNMAASLTGMICHGNGQG CALKARAGVQCAWDMSR. LALQ . . . S . LAVDSRH  
UniRef100\_A0A415YVU5 . . . . . L . P . IER . . . GQISMLANHGMICDGA KTT CALKIATG IQSAVLCAT. LAMQ . . . D . ISPTKE  
UniRef100\_A0A416EL32 . . . . . GR . L . KEIAH . . . TLVNSIAI VSGIICDGA KPS CAGKIASV DAGILGYD. MYIN . . . G . QQFYGGD  
UniRef100\_A0A416HBG5 . . . . . L . KNIFA . . . AVRTMTADISGMICDDGAKPG CALKIATSVNAAARAAQ. LAIN . . . G . IGATQDD  
UniRef100\_A0A416HK58 . . . . . G . GY . EEIVH . . . TIVNTLAN VSGVICDGA KAS CAAKIASAVDAGILGYC. MYRS . . . G . QEFVGGD  
UniRef100\_A0A416HL10 . . . . . AD . Y . DTHGR . . . TIIVNSLGN VSGVICDGA KSS CAAKIASAVEAGILLAYE. MAK . . . NG . RTFAFGE  
UniRef100\_A0A416JVW4 . . . . . G . DY . DVIAH . . . TVVNALAI VSGVICDGA KAS CAAKIATAVEAGIFGYN. MYIR . . . G . QEFYGGD  
UniRef100\_A0A416Q9J4 . . . . . GD . Y . NAI . . . TITNTLAN VSGVICDGA KSS CAAKIASAVDAIMAYY. LED . . . AD . HCFQAD  
UniRef100\_A0A416S2B0 . . . . . GG . F . EEVVAH . . . TLVNSLAA VSGVICDGA KPS CAAKIAASVEAGILGYD. MFRD . . . K . RKFVGGD  
UniRef100\_A0A416VY79 . . . . . Y . E . I . . . AVKNMIANLTGMICDGA KPS CAMKLTS GVSTAVMSAM. MAMD . . . N . KCVTSVE  
UniRef100\_A0A416ZGX8 . . . . . GT . R . E . I . . . TVVNTLGN VSGVICDGA KAS CAAKIASAVDAAILGCD. MAL . . . AG . RGFRAE  
UniRef100\_A0A417NH30 . . . . . AD . Y . ATVAH . . . TVINAVAVTSGVICDGA KAS CAGKISAVDAGIMGYE. MCLT . . . G . NNFHAGD  
UniRef100\_A0A418MGM1 . . . . . D . VLAS . . . VVKNIVGNLAGMVCDDGAKGG CALKVATSCGEAIIISAO. LALR . . . G . VSISNGD  
UniRef100\_A0A419T1W2 . . . . . GT . V . A . IEH . . . TVVNTIAN VSGMICDGA KAS CAAKVSSALQAAILGHQ. MAM . . . EG . ITFEAGE  
UniRef100\_A0A419TA55 . . . . . Y . HNI . . . TIVNMIGD IAGMICDGA KPG CALKVSTGVSAAIKSAL. LAID . . . G . IBISEYD  
UniRef100\_A0A420E9F4 . . . . . L . SKIET . . . CIQLMVADATGVFCDDGANAG CALKVSTGAANAIKTAL. LAMS . . . PG . LDPQADM  
UniRef100\_A0A420YXY9 . . . . . K . NQSSY . . . AIONNMVGNV TGMICDGA KPS CSLKASTGVSSAMISAL. LAME . . . D . ERCSSLE  
UniRef100\_A0A425VU58 . . . . . E . EOMGL . . . AINRMNMTGT VSGMICDDG KTG CAMKLAMATSAAYLSAR. MAVG . . . G . SVLRVSD  
UniRef100\_A0A425VYX7 . . . . . GS . F . GQFEA . . . TIVNTLAN VSGVICDGA KPS CAAKICAAVDAAILGCD. MAL . . . SD . DNFLAGD  
UniRef100\_A0A425WC06 . . . . . GS . F . GQYQA . . . TIANTLAN VSGVICDGA KPS CAAKIAAAVDAAILGCD. MAL . . . AN . VDFNPGD  
UniRef100\_A0A425XYU1 . . . . . L . NHLNS . . . TLKNMTGSVTGMICDDGANSS CAQKISASV CAGTQSSL. LAIN . . . S . QCLKNMD  
UniRef100\_A0A427URN7 . . . . . Y . DTHAM . . . AIGSMIGD VSGMICDGA SNS CAMKVSTSAAAWKA VL. MALD . . . G . TAVTNGE  
UniRef100\_A0A428LKM1 . . . . . Y . RTISM . . . AIGSMIGD VSGMICDGA SNS CAMKVSTSSAAWKA VL. MALD . . . D . TAVTNGE  
UniRef100\_A0A430A0E4 . . . . . Y . ATTAR . . . AVNNMIGDAPGVICDGA GCS CAMKVASAVSSLYRAAN. LALR . . . S . IEPSSN  
UniRef100\_A0A431I1N7 . . . . . FD . Y . DTHVAN . . . AIINTLAG VSGVLCDGANSS CAVKIANGTYAAYDGA. MAAN . . . G . NVVADGD  
UniRef100\_A0A431IVU9 . . . . . GD . Y . DKV . . . AIINTLAG VSGVFCDDGANSS CSIKIANGTYAAYDGA. SAMN . . . G . NVVTSGD  
UniRef100\_A0A431WCD8 . . . . . Y . QQSFC . . . AIONVMSDCSGMVCDDGAKST CAMKVSTSTGSAYNAFM. LAIQ . . . S . TAAQDQ  
UniRef100\_A0A437S6P3 . . . . . RP . V . NVLEE . . . TSNALVNSGLLLCDGAKPS CAMKIASLRNAPLAYE. QALS . . . G . ISFKSGD  
UniRef100\_A0A443YTF2 . . . . . A . KHIAG . . . AIKNMLLEDLAGIICDGA KTG CALKIATAGTAAYQAL. FSLQ . . . G . VNVHSTD  
UniRef100\_A0A444JRK2 . . . . . F . E . I . . . AICSMIGDITGIICDGA KTS CAMKVSSASAAYKAAL. MALD . . . G . RMVSGNE  
UniRef100\_A0A448TT4 . . . . . Y . EQSCF . . . AAQNVLSDCAGMVCDDGAKST CAMKVKTATNAAINGFL. MALQ . . . H . KEAHNQ  
UniRef100\_A0A482PTU1 . . . . . Y . STISM . . . AIGSMIGD VSGMICDGA SNS CAMKVSTASAAYKA VL. MALD . . . D . TAVTNGE  
UniRef100\_A0A484HIQ5 . . . . . GG . F . EEVVAH . . . TLVNALAI VSGIICDGA KPS CAAKVAAVSDAGILGFH. MYQK . . . G . QQFYGGD  
UniRef100\_A0A486KPW8 . . . . . I . NTINT . . . AINNMVSDITGMICDGA SNS CAMKVSSVSSAFKAVL. MAMO . . . N . SCAGAND  
UniRef100\_A0A486X8W4 . . . . . F . ETVSM . . . AISSMIGD ISGIICDGAANS CAMKVSTSVTSSYKAVL. MALD . . . N . MQVTGNE  
UniRef100\_A0A491FMG0 . . . . . F . KOIEG . . . AIENTMIDALSGMICDGA KAG CALKLSSAASATQSAI. IAKQ . . . D . CFVPLN  
UniRef100\_A0A495RET5 . . . . . F . DAVSM . . . ALCNMVGDITGIICDGA SNS CAMKVSTSSAAYKSVL. MALS . . . A . VRVTGNE  
UniRef100\_A0A496NC54 . . . . . GG . F . EEVEH . . . TVVNAVAI LSGMICDGA KSS CAAKIAAAVDAAGIFGYT. MYKS . . . G . QQFYSGD  
UniRef100\_A0A497KJ80 . . . . . P . KQAEV . . . AVAGLMA SLMGMTCDGGKGS CAFKVSTTAAGEAYLFAL. IALM . . . G . GGVNQTD  
UniRef100\_A0A497QPB3 . . . . . ENVHT . . . AINLLAGGMVGLMCDGAKDG CALKVSYSSQAAYVESAF. MALS . . . N . YRLSDEN  
UniRef100\_A0A498R6S7 . . . . . THIKY . . . AVQNMLGNVTGMLCDGAKAG CAMKVATCTASAAVQSAI. MAVE . . . N . RSIQATD  
UniRef100\_A0A498R9H5 . . . . . F . DTVSM . . . AISNMVGD LVGMICDGA SNS CAMKVSTTAAACAKSVL. MALE . . . G . TRVTGYE  
UniRef100\_A0A498RDK6 . . . . . AG . Y . DVIGK . . . TILNALGN VSGVICDGA KAS CAAKIASAVDAGILGYE. MAK . . . RD . LVFPFGE  
UniRef100\_A0A4D4IWI1 . . . . . L . AAIHR . . . AINSMIGD VSGVICDGA KAG CAMKVSTGASSAVKSAI. LAVA . . . G . RCVSSQ  
UniRef100\_A0A4QOV0H1 . . . . . L . EO . IYG . . . AIKNMIAG ISGMICDGA KLG CAYKLCTSVSSSIDAAR. MAIK . . . N . ICFVPSN  
UniRef100\_A0A4Q1DCD8 . . . . . ETLKA . . . TIQNMIGTSTGMLCDGAKAG CALKVASTYAAATQATN. LAIR . . . G . VBIQATD  
UniRef100\_A0A4Q2A3G4 . . . . . SKLPH . . . IDTMVANS LGMTCDGAKLG CSLKLTSTATAAGTQSVY. LKHH . . . N . SYADMKN  
UniRef100\_A0A4Q2BNQ7 . . . . . EN . E . STIEH . . . TVVNLAI LSGTICDGA KPS CAAKIAMAVNAGILGFQ. MALA . . . G . KEFVHGE  
UniRef100\_A0A4Q7VJN1 . . . . . L . THLSS . . . TLKNMTGSVTGMICDDGANSS CAHKIASVVSAGIQSSL. LAIN . . . S . QCLSNVD  
UniRef100\_A0A4Q9DKZ5 . . . . . L . PQMAG . . . ATKNNIAAGPTGIICDGA NYG CSFKVSTAVEAYYSAL. LALQ . . . G . AIATSSD  
UniRef100\_A0A4R1J9H0 . . . . . S . EQVEQ . . . TIRYMLGD ISGIICDGA KPS CALKVSTGAQTAVKAAL. LALG . . . G . RSPSLD  
UniRef100\_A0A4R1PYR4 . . . . . I . VKIEA . . . AMKNVIANLTGMICDDG KVG CALKLSTAAAAVESAL. LAQR . . . Q . IIVPSTN  
UniRef100\_A0A4R1R7W1 . . . . . GD . Y . DAISR . . . TITNTLAN VSGVICDGA KPS CAAKIATSVDAATLAHE. MSL . . . DG . NTFGAGE  
UniRef100\_A0A4R2EW06 . . . . . Y . E . I . . . AIKNMIAGLTGMICDDG KVG CSLKVSSGVSAAYKAAL. LALD . . . N . ICIQETD  
UniRef100\_A0A4R2FBL1 . . . . . Y . ROISY . . . AVSSMIGD VAGVICDGA KNA CAMKVSSAGSAVKSSL. MAID . . . N . IHTVGQE  
UniRef100\_A0A4R2K5C7 . . . . . Y . AQMTW . . . AINSMVAD ISGVVCDDGAKPG CALKIATAVQSAVRAAN. MALN . . . G . SGADSHD  
UniRef100\_A0A4R2LYB1 . . . . . GG . F . EEVVAH . . . TVVNALAI VSGVICDGA KPS CAGKIAAAVSDAGILGYQ. MYLH . . . G . QQFYGGD  
UniRef100\_A0A4R3JWV7 . . . . . E . IMAH . . . TIVNMASITGMICDDG NQG CTMKGIAA VDAAYKSV. FAMS . . . G . TYICDVH  
UniRef100\_A0A4R3L4U5 . . . . . S . OITY . . . AINNIAAGNITGMICDDG NYG CALKAITAANVAYTSAI. FAIN . . . N . TAIPENE  
UniRef100\_A0A4R3T7I3 . . . . . GD . Y . EHI . . . CH . . . TIVNALAITSGMLCDGAKPS CAAKIASAVDAGILGYA. MYKE . . . G . KQFYRGE



UniRef100\_A0A4R3Z6J8 . . . . . GD . Y . ET ICH . . . TLV NGLAI VS GIVCDGAK PS CAGKIAAS VDAGILGY . MYKN . . . G . YEFKGG D  
UniRef100\_A0A4R4AYC2 . . . . . E . TV IAC . . . AIK NMI SD ISGMVCDGAS GT CAMKVST AATS AIKSVL MATN . . . G . ISAGSY D  
UniRef100\_A0A4R4E6M5 . . . . . I . QOM EG . . . AIN NIA AN IT GMICDGNAYG CSFKVST SQVEAYFAAV LAIO . . . N . CMAST E  
UniRef100\_A0A4R4FDN4 . . . . . G . GY . EEV IH . . . TVV NALAI VS GIVCDGAK AS CAAKIAS VDAGILGY . MYTN . . . G . QQFYGG D  
UniRef100\_A0A4R5JJC1 . . . . . E . IO ISG . . . AMK SII AN LSGMICDGA KPS CSFKLAT SAGEA ITCAY LAIN . . . N . YIHAAQ D  
UniRef100\_A0A4R6GS1 . . . . . GR . F . KEV AH . . . TVV NALAI VS GIVCDGAK PS CAGKIAS SVEAGILGYL . MYKN . . . G . QQFYGG D  
UniRef100\_A0A4R6PZB2 . . . . . GD . L . DT I SH . . . TIV NALAI TS G IICDGA KAS CAAKIAVS VEAGIVGYE . MYQR . . . G . QQFYGG D  
UniRef100\_A0A4R6Q376 . . . . . GD . L . TT I SH . . . TIV NALAI TS G IICDGA KAS CAAKIAIS VEAGIVGYE . MYEN . . . G . QQFYGG D  
UniRef100\_A0A4R7B040 . . . . . A . GTV NM . . . AIC SMIGD LAGMICDGA S NS CAMKVST SVSA AWKAVL MAID . . . G . TRVTGN E  
UniRef100\_A0A4R7B5U9 . . . . . Y . PAV AR . . . AIC NMIGD VAGMICDGA NNG CAMKVSS VAAAVKSVL LAID . . . G . TRVGGS D  
UniRef100\_A0A4R8M2K0 . . . . . P . EKA AQ . . . AML VVLGN LVGMVCDGAK NT CALKVG TGALEYHAAL LVMN . . . G . H . APEP Q  
UniRef100\_A0A4R9C0K5 . . . . . QN . F . KIV EE . . . TIS NALMIA SGMICDGA KPS CAAKIAT AVDAGITGFN LAKR . . . G . KSFIA G D  
UniRef100\_A0A4T2AMU8 . . . . . T . KHM AG . . . AIT NLTED LAG IICDGA KSG CALKLAT AAGTAVQAAL FAVH . . . G . VNVHST D  
UniRef100\_A0A4U0ZN87 . . . . . V . HHM EG . . . AIK NILED LAGVICDGA KAG CAIKLNTA AGAVQAAL FSLH . . . G . VNVKDT D  
UniRef100\_A0A4U1AB57 . . . . . V . DHM AG . . . AIR NIMED LAGVICDGA KAG CALKLNTA AGAVQAAL FSLQ . . . G . INVKDT D  
UniRef100\_A0A4U1B1Y5 . . . . . A . NH IAG . . . AIK NILED LAGVICDGA KAG CAIKLNTA AGAVQAAL FSLQ . . . G . INVKDT D  
UniRef100\_A0A4U8Q6N7 . . . . . GD . F . KVI AH . . . TLV NSVAI VSG IICDGA KAS CAAKIAAS VDAGILGY . MYKN . . . G . KQFYSG D  
UniRef100\_A0A4U9P813 . . . . . L . ENI NY . . . CIN NMISD LSGMICDGA KET CALKIAT GTNAAIQCAN LAIN . . . G . ISATAN D  
UniRef100\_A0A4U9R5U1 . . . . . L . EEV KY . . . AIK NMAGN IVMICDGA KTG CALKVST GVSAAVMSAL LAID . . . H . IEISDQ D  
UniRef100\_A0A4V2Q9X5 . . . . . Y . GAV EK . . . AIT NMIA NITG IICDGA KAD CALKVYAS LQA AFEAAY LAID . . . G . VCAAGI E  
UniRef100\_A0A4V2SB21 . . . . . E . IO D G . . . AIK NMLAN VSGMICDGA KIG CALKLAT ASAVQAAL LAIS . . . D . N . VPAKN  
UniRef100\_A0A4V3RN36 . . . . . F . ETA SM . . . AIC SMIGD LSG IICDGA NS CAMKVST SVASGYKSVL MAMD . . . E . TRVTGN E  
UniRef100\_A0A4V4N705 . . . . . F . EOV GM . . . GVC SMIGD VAGMICDGA S NS CAMKVST ASSAYKAVL MAID . . . D . SRVTGE H  
UniRef100\_A0A4V5SD66 . . . . . Y . KH I IY . . . AIK NMAGG ITGMICDGA KVG CALKVSA VGSATQ TAV LAMD . . . N . IGISHL D  
UniRef100\_A0A4V6RC87 . . . . . Y . EO ISF . . . SVK NMIA NLTGMICDGA KPS CALKLITGVSTAVMSAM LAIQ . . . N . KHVTSAE  
UniRef100\_A0A4Y1WPX2 . . . . . Y . REV AC . . . AVQ NMIA NLTGMICDGA KPS CALKVSSGVSTAVMSAL LAVE . . . G . KCVTSA E  
UniRef100\_A0A4Y1WYC0 . . . . . Y . AEA AAA . . . AVK NMIA NLTGMICDGA KPS CAMKLITGVSTALLSAM MAMD . . . G . HCVTPV E  
UniRef100\_A0A4Y6IAG7 . . . . . F . EQSC F . . . AIQ NVISDS SGMVCDGA KAS CAMKVST SSCAAVRSFL MAMN . . . S . QVVQGO .  
UniRef100\_A0A4Y8L2N7 . . . . . Y . EOV TF . . . AVK NMIA NLTGMICDGA KPS CSMKLITGVSTAVFSAM LAME . . . Q . KYVTSV E  
UniRef100\_A0A4Z0D108 . . . . . D . QKI KA . . . SIN NTLAG ISGMFCDGA KEG CAYKLSISVTAATEASH LAIS . . . G . VOIPYDN  
UniRef100\_A0A4Z0R9A9 . . . . . A . EIK A . . . AIQ NMQGN TAGMFCDGA KVG CALKLSSCTNAAVLAAL MAID . . . G . IAIQPT D  
UniRef100\_A0A4Z0V643 . . . . . F . EQ IAA . . . TT K NMIA NLTGMICDGA KPS CAMKLSSGVSTAVISAL MAME . . . G . HCVTSV E  
UniRef100\_A0A509D2G6 . . . . . Y . DT I AM . . . AIS SMIGD VSGMICDGA S NS CAMKGLYVRGVGVS . . . GVD . . . G . VGRYGG .  
UniRef100\_A0A509LAY9 . . . . . GR . F . KEV AH . . . TIV NALAI VSG IICDGA KPS CASKIAVS IEAGILGFH MYQR . . . G . QQFYGG D  
UniRef100\_A0A509LCQ3 . . . . . GR . F . EEV AH . . . TIV SALAI VSG IICDGA KPS CAAKIAFS VEAGILGFH MFQK . . . G . QQFYGG D  
UniRef100\_A0A509LP8P . . . . . L . IO I SA . . . TIK NMAAS ITGMICDGA KQG CALKVSA GVSAAVYCAL LAIE . . . GS . CTTDT D  
UniRef100\_A0A511Z2W9 . . . . . Q . QV KKA . . . AVK NTIGN VSGMICDGA KAG CAMKVSTCSNVAVQSAI LAIN . . . D . QEIQST D  
UniRef100\_A0A518NI82 . . . . . G . DY . ET I IH . . . TLV NALAI TS G IICDGA KAS CAAKIAQS VEAGILGYQ . MYQN . . . G . QQFYAG D  
UniRef100\_A0A518NJM1 . . . . . E . EEL TK . . . V I QNMASGLTGMICDGNHGH CVMKGITAVDAAFRAVD LAME . . . G . ICIEI NI H  
UniRef100\_A0A521CRD8 . . . . . L . EQL GM . . . TLQ NMTGSVTGMICDGA KGT CSHKISSVGAATQSSL LAMN . . . H . NHLNGLN  
UniRef100\_A0A521LL13 . . . . . Q . KQD M . . . AFNT TMVGNLTG IICDGA KGT CALKIYSCEVAHLVAVK LAIK . . . G . VGADGKS  
UniRef100\_A0A522CI92 . . . . . L . HH IAG . . . AIT NLTED LAGVICDGA KAG CSLKLAT AAGTAVQAAL FSLH . . . G . VNVKAT D  
UniRef100\_A0A522KL8C . . . . . F . GVL EC . . . AVS NVMGD ISG IICDGA S NT CAMKVSTSVNSAFRSVL LAGQ . . . N . TRASSAD  
UniRef100\_A0A522M0Y6 . . . . . A . AEV SA . . . AAT NIVGN LAGMICDGA KIG CALKTM TGVDAAFRAA LARA . . . G . LVIPVS D  
UniRef100\_A0A524DGQ2 . . . . . E . EBN N . . . AIN LVVAN ITG IICDGA KEG CALKLGTASAVATEESAL MALE . . . G . KIPPDN  
UniRef100\_A0A524DSA1 . . . . . S . QO I NN . . . AIN LMAANNVGF LCDGA KPG CALKISTAGIATECAL IALQ . . . D . NLINSDN  
UniRef100\_A0A524EWE5 . . . . . S . QO I HN . . . AIN LMAANNVGF LCDGA KPG CALKVSTAGIATECAL MALE . . . N . NTINSDN  
UniRef100\_A0A524N1Q1 . . . . . P . QLA DV . . . AVAS L IASVMGMVCDGKGSG CALKVSTAGAEALYAM LALM . . . G . GGLNKTQ  
UniRef100\_A0A525D514 . . . . . L . NH I SG . . . AIK NLT TDLAGVICDGA KSG CALKLVTAGTAVQASL FSLQ . . . G . VVVEAT D  
UniRef100\_A0A525D8T0 . . . . . V . SHM AG . . . AIK NIMED LAGVICDGA KAG CALKLNTA AGAVQAAL FSLQ . . . G . INVKDT D  
UniRef100\_A0A544QXW4 . . . . . S . QO I EG . . . AMEN MIA D LSGMICDGA KPG CACKLATASSAVQNAL LAKR . . . G . CIPALN  
UniRef100\_A0A550AMM4 . . . . . Y . QO SCY . . . AIQ NVLSDCSGMVCDGA KST CAMKVRTTSGSAVNAMF LAITQ . . . S . TTAQDQ .  
UniRef100\_A0A553GAJ5 . . . . . GR . Y . KEV AH . . . TIV NALAI VSG IICDGA KPS CAGKIAS SVEAGILGYH . MYKN . . . G . QQFYGG D  
UniRef100\_A0A556SYN1 . . . . . L . DIE KMNL . . . AVNT IISD IGMCLDGA KGG CALKVVSSTDASTRAY . MALS . . . G . HGITEE E  
UniRef100\_A0A562JKA9 . . . . . S . KO I KS . . . SIN NMVAG ISGMCLDGA KLG CSYKLSISVDAAVDASE MALK . . . N . FIPDDN  
UniRef100\_A0A562JRJ7 . . . . . Q . QV KKA . . . AIQ NTIGN VSGMICDGA KAG CAMKVSTCSNVAVQSAI LAIN . . . N . QEIRST D  
UniRef100\_A0A564URK6 . . . . . AD . Y . DV IGT . . . TIV NAVGTG IICDGA KSS CASKIAS SVEAGILGYE . MAR . . . RG . RKFQFE  
UniRef100\_A0A5B0CPU5 . . . . . Q . IO I KA . . . AVQ NTIGN VSGMICDGA KAG CAMKVSTCSNVAVQSAI LAIS . . . D . QEIQST D  
UniRef100\_A0A5B7ZGB2 . . . . . LS . D . KEI EA . . . V I SNALAI TS GLLCDGA KSS CAAKISMSVEGALLALD . MVKH . . . K . KAFRAG D  
UniRef100\_A0A5B8Z9B3 . . . . . Q . QV KKA . . . AVQ NTIGN VSGMICDGA KAG CAMKVSTCSNVAVQSAI LAIN . . . H . KEIQST D  
UniRef100\_A0A5C0SGK9 . . . . . E . IO D G . . . V I K NMLAN VSGMICDGA KVG CALKLATASTAIQSAI LAIS . . . N . NIVPSRN  
UniRef100\_A0A5C0T1Y8 . . . . . S . QO I EG . . . AMEN MIA NLSGMICDGA KPG CACKLATASSAVQNAI LAKR . . . G . CIVPGLN  
UniRef100\_A0A5C1QU93 . . . . . E . KAI RG . . . AVK NSISP LAGMLCDGA KNG CALKMSIASMTALNAVE LAES . . . G . IEVGYF D  
UniRef100\_A0A5C5D7Q5 . . . . . Y . QO ISM . . . AIS NMIGD VSGMICDGA S NS CAMKVRTSVSA AWKAVL MAID . . . N . TAVSGNE  
UniRef100\_A0A5C6HQN6 . . . . . Y . QO I AY . . . AVK NMIA NLTGMICDGA KPS CALKVTTGVSTAVLSAI MAME . . . N . RCVTSV E  
UniRef100\_A0A5C7EPT0 . . . . . GT . R . EOG IGA . . . TIV NTLGN VGG IICDGA KAS CAAKIASA VDAALIGCD . MAL . . . EG . RFRAGE  
UniRef100\_A0A5C7WBI2 . . . . . Y . EOI TF . . . AVQ NMIA NLTGMICDGA KPS CALKLISGVSTAVFSAI LAME . . . H . KCVSSV .  
UniRef100\_A0A5C8EY68 . . . . . AT . Y . KO I SD . . . TI I NALCTIGMVCDGA KSS CASKIAEADICGLAFN MAK . . . DG . KVFKSG D  
UniRef100\_A0A5C8M9N7 . . . . . T . E I RA . . . AIQ NMLGNVTGMMCDGA KGG CAMKVATCTSAAVQSAI LASK . . . G . MAISSTN  
UniRef100\_A0A5C9DNR8 . . . . . G . GL . KEV EG . . . SI I NTLAN VSGVICDGA KAS CAAKIATGVDAATIAQY LAMK . . . G . KVEDGC  
UniRef100\_A0A5C9DU17 . . . . . K . MH I Q . . . AIN LLAAN ITGMICDGA KAG CALKISTASGVAIECAL MATN . . . G . ANIASDN  
UniRef100\_A0A5D6W1Z3 . . . . . GD . Y . KAV IH . . . TIV NALAI TS G IICDGA KAS CAAKIAAAVDAGILGF . MYRN . . . G . QQFYGG D  
UniRef100\_A0A5K1J5F7 . . . . . L . QO IKF . . . AVN NMLATLSGMICDGA KAT CALKICAGTSAATQSS LAIA . . . D . ISPTSK D  
UniRef100\_A0A5K7YEW8 . . . . . A . IOA ER . . . AVSTFVAAL LGMVCDGA KES CGLKVSTAAQAAYTTAM LVLS . . . G . GGIHDTQ  
UniRef100\_A0A5K7YT21 . . . . . K . HH IAG . . . AIK NLAED LAGVICDGA KGG CALKLATAAGTAVQAAL FSLQ . . . G . VNVSFT D  
UniRef100\_A0A5K7ZLE3 . . . . . K . QH IAG . . . AIK NLTED LAGVICDGA KGG CALKLATAAGTAVQAAL FSLQ . . . G . VNVSFT D  
UniRef100\_A0A5K7ZZM1 . . . . . K . AH IAG . . . AIK NLTED LAGVICDGA KGG CALKLATAAGTAVQAAL FSLH . . . G . VNVSFT D  
UniRef100\_A0A5M7L1B9 . . . . . L . NVES . . . AVI NMISD VSG IICDGA S GS CAMKVSTATSSAFRSVL MARQ . . . G . VRVSST D  
UniRef100\_A0A5M9NAC5 . . . . . L . AOK IG . . . AIK NMIA G I SGMICDGA KIG CSYKLAISVNAALDAAK MANR . . . N . FIPSDQ  
UniRef100\_A0A5N7IN9G . . . . . AD . Y . DV I GK . . . TI I NTLGN VGG IICDGA KAS CAAKIASA VDAAGIMGYE MAK . . . YD . RVFPFE  
UniRef100\_A0A5P0ZTQ0 . . . . . F . ETA SM . . . SIK NMAGD SGMVCDGA GCS CAMKVASSVSSMYRGMK LAMK . . . G . IVVPSSN  
UniRef100\_A0A5P8E3K1 . . . . . Y . EOV TF . . . AVK NMIA NLTGMICDGA KPS CSLKLITGVSTAVLSAI LAML . . . G . EHVTSDE  
UniRef100\_A0A5Q0TH62 . . . . . F . EQSCH . . . AIQ NVLSDCSGMVCDGA KST CAMKVRTTSAAVTGFI MAMN . . . S . QQAQSO .  
UniRef100\_A0A5Q2TCT7 . . . . . L . NTI NA . . . AVI NMVSDVTGMICDGA S NS CAMKVSSVSSAFRSVL MAMO . . . D . SCASAN D  
UniRef100\_A4Y4Q4 . . . . . F . EQSC F . . . AIT NVISDS SGMVCDGA KAS CAMKVSTSSSAVRSFL MAMN . . . S . QNVSGQ .  
UniRef100\_A6TX17 . . . . . Q . O I D G . . . V I K NMLAN VSGMICDGA KVG CALKLATSAQVAIQSAI LAMD . . . H . HTVPTGN  
UniRef100\_A8MIF4 . . . . . E . EKI DG . . . TIK NMIGN LSGMICDGA KVG CALKLATSAATIQSAI LAIN . . . G . HVIPSKN  
UniRef100\_A8RF28 . . . . . Q . DY . ET V AH . . . TIV NALIG VSGMVCDGA KAS CAAKIAQAAVDAGIMGYC MYLA . . . H . GQFRDG  
UniRef100\_A8RGM5 . . . . . H . EOM GY . . . AIT NMSSGNLTGMICDGGKIG CALKLATASGAALMSAC LAVD . . . K . TVLDPK D  
UniRef100\_A9A9J5 . . . . . NLKKLDS . . . SARTFTANLP IICDGGKVG CALKLATSGCFAAYSSLF VD . . . . . ISYEN  
UniRef100\_A9KNN3 . . . . . GN . E . EO I NQ . . . TI I NTLAN VSGVICDGA KSS CAAKIASA VDAATVATM ISLK . . . G . KGFLSG D  
UniRef100\_B0MUK5 . . . . . Y . EAV SF . . . AVK NMIA NLTGMMCDGA KPS CSLKLITGVSTAVLSAM LAME . . . N . HVSVSSE  
UniRef100\_B0TUD9 . . . . . L . EO I SA . . . AIC SMIGD VSG IICDGA KAS CAMKVSSSAGSAVKSAL MAID . . . G . IRVTGE  
UniRef100\_B0TX30 . . . . . LS . E . DKVE K . . . SI I NLAGITGIMCDGA S NS CSIKIAN SVYAFDAVN AAML . . . G . NTVTPH D  
UniRef100\_B0VHZ2 . . . . . Y . PO I EY . . . AIN NMIA DTAGMVCDGA KEG CSLKVATTTSAVQAAL LAKT . . . G . ICVSSND  
UniRef100\_B1C1Q1 . . . . . GD . Y . QO CIAH . . . TLV NSLAITS G IICDGA KSS CAAKIAAS VDAGILGY . MYLE . . . G . QEFKDG D  
UniRef100\_B1KQ25 . . . . . F . EQSC F . . . AIT NVISDS SGMVCDGA KAS CAMKVSTSSCAA VRAFL MAMN . . . S . RSVSGQ .  
UniRef100\_B2KCX0 . . . . . L . KKI TL . . . AIN NIA ISD IGMCLDGA KSG CALKVVSVDSAITRAAY MGIN . . . N . YGITEL E  
UniRef100\_B7CB13 . . . . . G . TY . EE I QH . . . TIV NALAI TS G IICDGA KAS CAAKIAS IDAGIMGY . MYKN . . . K . QQFYAG D  
UniRef100\_B9L7K6 . . . . . K . EVSK K . . . AVS V I QD I NGVICDGA KMA CSLKVRLGAKSGYEAAM FAL . . . G . KPVSFD  
UniRef100\_C0D3S7 . . . . . G . GY . DEV VH . . . TVV NALAV VSGVICDGA KAS CAAKIASA VDAAGILGYN MYIR . . . G . QQFYGG D  
UniRef100\_C0QFK8 . . . . . P . GO I GG . . . AVEN I IED LAGVICDGA KNS CALKLDTAAARAVQAAL FAMN . . . G . LTVKVT D  
UniRef100\_C2L0B5 . . . . . E . QMEY . . . T I N NMAS ITGMICDGNQG CTMKGVAAACDAAFRSVA FAMK . . . G . VHIDKVH



UniRef100\_C2L0Q0 . . . . . GN.Y..QK IGR...TISNTLGNVGGIVCDGAKPSCAAKIASVHAAILLAHH.MSM...KD.QGFHGG E  
UniRef100\_C2MA54 . . . . . K..QV VSY...AVKNMVGNITGLLCDGAKPSCSLKVSSGVSTAMFSAL.LAME...Q..KVVVTGS E  
UniRef100\_C5BAM6 . . . . . F..QA IGO...AITNMISDVSGIICDGAASNSCAMKVSTTTMSAFKSVL.MARQ...N..HCAGKN D  
UniRef100\_C6BST6 . . . . . Q..V EES...TIKNTLGDITAGMICDGAKTS CALKVSSAVEAAATNSAL.LAMK...G..TSIPGK D  
UniRef100\_C6L8Z4 . . . . . GD.Y..DA VCR...TITNTIANMGVVCDGAKSSCAAKIASAVDAATLAYS.LER...EN.RCFQPG E  
UniRef100\_C6LJG2 . . . . . L..E OIRY...EINNMTASVSGIICDGAASNSCALKVSSVIVSSACQCAA.LALK...D..HSAGSM D  
UniRef100\_C6Q223 . . . . . .DMM SH...VLNNIASSITGMICDGGNQGCTMKGIVAVDAAYKAVD.FAMN...G..YIDNVH  
UniRef100\_C6Q2H5 . . . . . L..K OLEG...AIKNMSAGITGMICDGAKIGCSYKLSISVTAALDAAK.MAMK...N..IFIPCN D  
UniRef100\_C9KVL1 . . . . . Y..D VAF...AVQNMIANLTGMICDGAKPS CALKVTTGVSTAVLSAM.MAME...D..RCVTSV E  
UniRef100\_C9LDF2 . . . . . Y..RH MTY...AIQNMIANLTGMICDGAKPS CALKLTITGVSTAVLSAM.MAMO...E..ESVTSAE E  
UniRef100\_C9M8S4 . . . . . N..Q OAK...AMELLLGNITGMVCDGAKES CALKVGTGATEAFYAAQ.IALS...G..GGMVAVSQ  
UniRef100\_C9MTE5 . . . . . Y..VNV CH...AVKNMIANLTGMICDGAKPSCSLKISSGVSTAILSAT.LSME...G..KHVTSAE E  
UniRef100\_C9PW11 . . . . . F..E OICY...SVKNMIANLTGMICDGAKPS CALKLSSGVSTAVLSAM.LAIQ...H..KYVTSV E  
UniRef100\_D1B8Y5 . . . . . L..E EVKE...AMGMVLANLAGMLCDGAKES CALKVGTGSYEAYLAAR.WAVQ...G..IKMFKPQ  
UniRef100\_D1PPN9 . . . . . G..TL..D O IKA...TIDNTLANIPGIICDGAKASCAAKIAASLDAAMLHAH.LAMA...G..RSYGAHN  
UniRef100\_D1PU19 . . . . . Y..TH MCH...AINNVMANLTGMICDGAKPSCSIKITCSGVSSAILLSAL.LSIE...G..QYVTSAE E  
UniRef100\_D1VYW2 . . . . . Y..AH ICY...SIKNMIANLTGIICDGAKPSCSLKISSGVSTAVLSAL.LSME...N..KHVTSAE E  
UniRef100\_D1Y6A7 . . . . . D..A QAKK...AMELVLGNITGMLCDGAKES CALKVGTGATEAFYAAQ.IALS...G..GGMTVSQ  
UniRef100\_D2MF51 . . . . . PD..E..Q LVCD...TISNSLMIVSGMVCDGAKPSCAAKIASAVDAGYTGFO.MALH...Q..RTFQVG E  
UniRef100\_D2RIV4 . . . . . EG..Y..E AISH...TLVNSLAI VSGIICDGAASCAAKIASVVEAGILGYA.MYKS...G..NEFKSG D  
UniRef100\_D2Z6R2 . . . . . . .V ELSIK...AMEIVLGNLVGMVCDGAKET CALKVSTGAAEAYLAAM.TVLG...G..NHLKGAQ  
UniRef100\_D3HWC7 . . . . . Y..G DVCH...AVKNMIANLTGMICDGAKPSCSLKITCSGVSTAILLSAL.LARE...G..KHVTAEE  
UniRef100\_D3IDC4 . . . . . Y..D KICH...SVKNMIANLAGMLCDGAKPGCSLKISSGVSTAILLSAV.LSME...G..RFVTAEE  
UniRef100\_D3LTV6 . . . . . H..DR..Q VVID...AICSMVTGDLPGMICDGAANS CSMKVASASAAAYKAVL.LALE...G..TRVGGN D  
UniRef100\_D3PCE0 . . . . . . .Q..K HIGG...AICNVQDLIAGVICDGAAG CALKLATAGGSVAVRSAL.LSILQ...G..ITAQSS D  
UniRef100\_D3S649 . . . . . . .AD KIEE...SIKSFTANLPGIIVCDGGKIG CALKIASGVFAIYLSLF.SK...V..VPYTN  
UniRef100\_D3UGV7 . . . . . . .F..D VVSR...GICNMIGDISGILCDGAANG CSMKVSTTVQSVFSL.LIALE...Q..SSLNAQ D  
UniRef100\_D4CJP0 . . . . . GG..L..R EHEN...TIINTLENISGIVCDGAKESCAAKIASIDAAITMGSD.MAME...G..R.FSRD  
UniRef100\_D4CJV0 . . . . . GD.Y..P RISK...TITNTLANVGGIVCDGAKPSCAAKVASLHAATLAHH.MSM...ND..KSFAAG E  
UniRef100\_D5EC14 . . . . . . .L..H KAEK...AVEILVSNLVGMLCDGAKDTCALKVGTGAYEAYCAAM.IVLE...G..NELDGPQ  
UniRef100\_D5EER4 . . . . . . .K EVEN...TVHMLANLTGMLCDGAKYGCALKMATSGAGAAIECAYM.AML...N..AKVPGNN  
UniRef100\_D5ES46 . . . . . . .Y..E RICY...AVKNMIANLTGMICDGAKPSCSLKITSVSTAILLSAL.LAME...G..KCVSQD E  
UniRef100\_D6GQL7 . . . . . EP..T..N I IKE...TLVNSLAGNSGILCDGAKPSCAMKIASINNAPFLGYR.QART...D..KNSFVSG D  
UniRef100\_D7NED5 . . . . . F..Q DVCH...AVKNMIANLTGMICDGAKPSCSLKITCSGVSTAILLSAL.LARE...G..KHVTAEE  
UniRef100\_D8DSZ7 . . . . . Y..S RICH...TVQNMIANLTGMICDGAKPSCSLKITCSGVSTAILLSAM.LSIE...G..KHWTSAE E  
UniRef100\_D8GIX4 . . . . . GD.Y..D TIGK...TIINSIGTVGGIVCDGAKASCAAKISSVDAGILMGYE.MAK...HG..LVFPFGE  
UniRef100\_D9R3W3 . . . . . GG..Y..E EVIH...TIIVNALAIVSGIVCDGAKSSCAAKIASSTEAGILGYN.MYVQ...G..QQFMGD D  
UniRef100\_E0NUQ4 . . . . . . .Y..E QISY...SVKNMIANLTGMICDGAKPS CALKLTITGVGTAVMSAM.LAIQ...H..KYVTSV E  
UniRef100\_E0QK30 . . . . . . .E QMKG...ACONLLANLTGMICDGAKDNCSLKLSVCAAEAVVSSY.LALN...G..G.VIVRNKV  
UniRef100\_E1QWD0 . . . . . GS.F..A QFEA...TIVNTLANVGGIVCDGAKPSCAAKICAAVDAAILGCD.MAL...AD..DNFLAG D  
UniRef100\_E1R8R6 . . . . . Y..P EVER...AIQNMAAGNVAGIICDGAKSSCALKVASVHAAGQAAL.LAMK...G..RSVSSIE  
UniRef100\_E2SLD3 . . . . . GD..Y..E HICH...TIIVNALAITSGLICDGAKPSCAAKIATAVDAGIMGCM.MYQK...G..KQFYRGE  
UniRef100\_E2ZB81 . . . . . Y..E MLEA...VISNMTGEHIGMVCDGAGDGC SLKIIATAVDAAAYRAV.LARK...G..TRVGGAE E  
UniRef100\_E3C6S8 . . . . . V..E DAAR...AIKIMIGDANGMICDGAACESCAVKVSTAVQTMIKAVD.MALQ...G..ITIPATN  
UniRef100\_E3CW32 . . . . . P..E VVSA...SMELLANLAGMLCDGAKES CALKVGVGAACEAFLSAR.FALE...G..RALSPLQ  
UniRef100\_E3CYF9 . . . . . . .K OARER...AVLLLFADLAGMLCDGAKYGCALKLISTAGVALESAL.LALE...G..AALPPGN  
UniRef100\_E3H8R8 . . . . . GD..L..K AVED...ALTNTLANISGLICDGAKASCAFKIATGIYAAPFDSAL.LALD...R..RVFNPA D  
UniRef100\_E4RJW4 . . . . . . .D KIEY...GINNLLISDVSGVYCDGAKSGCALKLISTAAELALRHFD.LIDE...D..TNCHLPS  
UniRef100\_E6VST2 . . . . . . .A THIAG...AIKNLLEDLAGIICDGAAG CALKLSTAGTAAGVQAAL.FALH...G..VNVHAT D  
UniRef100\_E7G7U8 . . . . . GD..Y..K TIAH...TLVNALAINSGIVCDGAKPSCAAKIAESVDAGILGYY.MYKN...G..CQFKGG D  
UniRef100\_E7NTW9 . . . . . G..TY..K OISD...TITNTLATVSGIICDGAKPSCSKIIAASVNAATIASYR.LAMK...G..EVFSAG D  
UniRef100\_E7RMC4 . . . . . Y..Y..N RICH...AVKNMIANLTGMICDGAKPSCSLKITCSGVSTAILLSAL.LSME...G..KHVTAEE  
UniRef100\_E8LDS6 . . . . . CT..D..D OIEH...AVENALAINSGIICDGAKSSCAAKIAMAVEGILMGVD.MSVA...E..RNFAGG D  
UniRef100\_F0F417 . . . . . Y..Y..V NVCH...SVKNMIANLTGMICDGAKPSCSLKISSGVSTAILSAT.LSME...G..KHVTAEE  
UniRef100\_F0JCR0 . . . . . A..H HIAG...AIKNLMEDLAGIICDGAKTGCALKLATAGATVQAAL.FSLQ...G..VNVVHT D  
UniRef100\_F0RYC8 . . . . . L..L EMDR...AFNTMVGNLTGIICDGAKMT CALKIYSCVEANLACK.LAFR...G..MSPGNES  
UniRef100\_F0TBF8 . . . . . D..D IKS...ALQNLGNVTGIICDGAAG CALKVATCTTAATQSVI.CVME...G..QHIQST D  
UniRef100\_F2LUV2 . . . . . . .S DLFSL...AFFNYIEGVGGVCDGAKRGCSAKALYAVKMAFEAIW.LAEK...G..G.VIIGFK D  
UniRef100\_F2NA26 . . . . . GS.C..Q RIED...TVVNTIANIGMVCDGAKPSCAAKIYTALEAAFLGHE.MAM...RG..SRFEAG D  
UniRef100\_F3AAY4 . . . . . GG..Y..T OVAH...TIIVNALAINSGVVC DGAASCAAKIASAVEAGTLGMK.MYQF...G..SQFYGG D  
UniRef100\_F3BA59 . . . . . G..TY..E EIIH...TVVNALAIVSGIVCDGAKASCAAKIASAVDAGILGYN.MYKC...G..QQFYEG D  
UniRef100\_F3PR02 . . . . . Y..E QVAY...AVQNMIANLTGMICDGAKPS CALKVTTGVSTAVLSAI.MAME...N..RYVTSV E  
UniRef100\_F3QUJ3 . . . . . Y..E QVSY...AVKNMIANLTGMICDGAKPS CALKLTISGVSTAVLSAM.LAMO...Q..KCVSSV E  
UniRef100\_F4GHI1 . . . . . GD..A..R KISM...TITNTLASITGMICDGAKAS CALKIATAVDSAILGHE.LAM...QG..RTFDDG D  
UniRef100\_F4GJT0 . . . . . GT..L..H OIEQ...TITNSLGTASGVICDGAKPSCAAKIALCLIESATMAHQ.LAME...G..QAFQSG E  
UniRef100\_F4LLB6 . . . . . GG..Y..E EVIH...TVVNALAIVSGIVCDGAKASCAAKIASSTEAGILGYD.MYAH...G..G.QOYFGG D  
UniRef100\_F4LUK2 . . . . . L..L EOVEG...AIKNMIGTMAGIICDGGKPGCAFKLISISVDAALESAL.MALN...D..TIVISSA D  
UniRef100\_F4LUS7 . . . . . G..TL..K OIER...TITNTLGNVSGIVCDGAKSSCAAKIASGLDAAIMAHF.LAMR...G..TAFETNS  
UniRef100\_F4XCZ3 . . . . . YP..Y..E VLC D...TITNTIATVGMVCDGAKSSCAAKIATAVETALLGMK.MGLH...N..RTFQPG E  
UniRef100\_F5T7C5 . . . . . GR..L..D TEIEH...TLVNSLAIASGVICDGAKASCAAKIGLAVENGIMGYE.MYQO...G..QVVFGG D  
UniRef100\_F6DRL7 . . . . . G..G..T AIEA...AMKNLIANLTGMICDGGKVGCALKLSTAGAAVSSSL.LARG...E..VVVPDTN  
UniRef100\_F7JQN6 . . . . . GG..Y..Y KEIAH...TVVNALAINSGMVCDGAKASCAAKIASAVGAGILGME.MYRO...G..SQVFGG D  
UniRef100\_F7NEK3 . . . . . . .I..R AVEA...AMKNMIANLTGMICDGGKVGCALKLSTAAAAVSSAL.LACR...Q..QVVPSSN  
UniRef100\_F7NFD1 . . . . . CS..Y..E EICN...TITNTIGNIGMVCDGAKPSCAAKIASAVEAAILLALH.LSRK...N..RVFQPG E  
UniRef100\_F7Q0I2 . . . . . GS..K..S OIED...TIKNLIANISGVFCDGAKPSCSKIIASVDAAPQASM.LAM...DG..YSVEPN E  
UniRef100\_F7UVX8 . . . . . G..GY..K DACH...AVNVALSIVAGMVCDGAKPS CAGKIATAFVNAAGILGYV.MYRD...G..QOYFGG D  
UniRef100\_F8N6M6 . . . . . Y..Y..S RVCA...AICNMVANLTGMICDGAKPSCSIKITCSGVSSAILLSAL.LSMQ...H..QOVTAAE E  
UniRef100\_F9MQQ2 . . . . . H..ER..S VICN...AICNMTGDLSGMICDGAANS CSMKVASASAAAFKAVL.LAME...G..TRVSGH D  
UniRef100\_F9N6H6 . . . . . ES..K..E VVWE...TISNALAGTSGVVC DGAASCAMKIGMSLGNSLAYT.QAKT...D..NSFKAGQ  
UniRef100\_F9R9Y5 . . . . . F..TH ISS...AICNMIGDITGIICDGAKTS CAMKVSSASAAATKAAM.MALD...G..RVTGAE E  
UniRef100\_F9TAG3 . . . . . Y..E QOCY...AIQNVLSDTSGMVCDGAKAT CAMKVSSSTTAAVKSVM.MAMR...N..HAAANQ.  
UniRef100\_F9Z2U9 . . . . . Y..E QVNV...TIKTMCSNLTGMMDGAKQGCALKVYSGVSAVQAAL.LSMK...G..I.KTHN D  
UniRef100\_G0H2U2 . . . . . NIKKLDS..AARTFTANLPGIICDGGKVGCALKLASGCSFAAYSSLF.MD...ISYEN  
UniRef100\_G0V3L8 . . . . . Y..DN ITK...AICNMVAGC...LAME...G..SAVPGNE  
UniRef100\_G1UT72 . . . . . L..K EDEM...TVRNMVGNITAGMICDGAKSS CALKVASAVGAGTQAVM.LAME...G..SAVPGNE  
UniRef100\_G1UU44 . . . . . . .N OLAG...VINSMGTLIAGMLCDGAKGGCAFKLATAGAAEAVLCAL.LASQ...N..THIGHQ  
UniRef100\_G1WEE9 . . . . . Y..Y..S DVCH...AVKNMIANLTGMICDGAKPSCSLKITCSGVSTAILLSAL.LARE...G..RCVTSAE E  
UniRef100\_G1WJX7 . . . . . GS..R..E QIGA...TVVNTLGNVGGIVCDGAKASCAAKIASAVDAAILGCD.MAL...AD..RGFRAGE  
UniRef100\_G2FU11 . . . . . . .E EIKAE...AIQNMQGNATGMVCDGAKVGCALKLISTCTSAAVQSAI.MAIE...G..KVIQGT D  
UniRef100\_G4D522 . . . . . EN..I..D VLKE...TISNSLAVNSGIICDGAKPSCAMKIASSLRNAPFLAYE.QAKT...N..NSFNPG D  
UniRef100\_G4KPR6 . . . . . . .K OIGY...AVNNMLGDVTGMLCDGAKAD CALKISTCTVCTAFNCAA.MALR...D..ETVKST D  
UniRef100\_G4L141 . . . . . YP..S..S VLYD...TITNTIATVSGMVCDGAKSSCAAKISTALQTLALGLK.MGIH...D..LRFQPG E  
UniRef100\_G4Q4Z6 . . . . . . .D EIQK...AISNMASITGMICDGGNQG CIMKGITAVELSFTSAE.LAMR...G..RYIFSNH  
UniRef100\_G5GAJ6 . . . . . Y..Y..Q OITY...AVQNMIANLTGMICDGAKPSCAMKLTITGVSTAVMCAM.LAMO...N..EYVTSV E  
UniRef100\_G5HEI2 . . . . . E..DD..R VYKH...AIVNCLAITSGIICDGAKPSCAAKIASIDAAPFLALE.MARD...G..G.EFKFGG D  
UniRef100\_G5IAK3 . . . . . G..DY..K DVVH...TVVNALAI VSGIVCDGAKASCAAKIASAVDAGILGYN.MYKR...G..QOYFGG D  
UniRef100\_G7WDA6 . . . . . GG..Y..E EISQ...TITNTIANIGMVCDGAKPSCAAKIASAIGAGILGYQ.LSV...QG..KVFKNGE  
UniRef100\_G7WJK3 . . . . . . .R EIKS...AIQNMQGNITGMFCDGAKVGCALKLSTCTSAAVQSAI.MAVQ...G..KTIQST D  
UniRef100\_G8QSL3 . . . . . . .I..A VMDR...AINTMIGNLTGIICDGAKMT CALKIYSCVEAACLACK.LAFR...G..FSPGSES  
UniRef100\_G8QX01 . . . . . AS..R..K VIEA...TITNTLANVSGIVCDGAKASCAAKIASVVEAQMAYF.MVA...DG..HVFLSG D  
UniRef100\_G8QX20 . . . . . GR..Y..Q EISN...TITNSICTVGMICDGAKPSCAAKIASIALEAALNGYC.IQD...NG..GVFKHGE  
UniRef100\_G8QXHO . . . . . GR..Y..Q EISN...VITNCLADIGVVCDGAKASCAKSIATAVKSGTFAPE.MGMK...EN..KSFING D  
UniRef100\_G9WPW8 . . . . . GD..Y..H KIGK...TISNTLGNVGGIVCDGAKPSCAAKIASVHAAILLAHS.MSM...KD.QGFNGGE

UniRef100\_G9YIV9 . . . . . Y . TEL EA . . . T I A N M T A E H I G M I C D G A G D G C S L K I A T A V D A A Y R A V F L S R R . . . G . I R V N G T E  
UniRef100\_H0U7D0 . . . . . N Q I S F . . . A I Q N T I G N V T G M L C D G A K A G C A M K V S T C T G A A V Q S A L L A S Q . . . G . I G V P G T N  
UniRef100\_H0UNL1 . . . . . V Q R V Q S . . A M E M V L A N L A G M L C D G A K A G C A L K V G T G S H E A Y L A A R M A A S . . . G . I S L C K P Q  
UniRef100\_H1DGB7 . . . . . Y E Q V V N . . T I K T M C S N L T G M M C D G A K Q G C A L K V Y S G V S A A Y Q A A L L S M R . . . G . I . K T N N D  
UniRef100\_H1HSG3 . . . . . G D E . K R I A C . . T I T N T L G N V G G I V C D G A K P S C A A K I A S S V H A A I L A Y Q M S M . . . R D . Q O F Q P A G E  
UniRef100\_H1HTE4 . . . . . G D Y . A O I S R . . T I T N T L G N V G G I V C D G A K P S C A A K I A S S V H A A I L A H H M S M . . . S N . R C F Q A G E  
UniRef100\_H1Q0Q2 . . . . . Y . T N I C H . . S V K N M I A N L T G M I C D G A K P S C S L K I S S G V S T A V L S A T L S M E . . . G . K H V T A A E  
UniRef100\_H3KEV9 . . . . . Y A . D N E I A D . . V V S N A L A T T S G L I C D G A K S S C A A K I A S S V E G A L M A L D M V A Q . . . E . K V F R E G D  
UniRef100\_H5XWU0 . . . . . G D . Y . D A I A H . . T V V N A L A I V S G I V C D G A K S S C A A K I A S S A V D A G I L G F S M Y Q S . . . G . Q E F C G G D  
UniRef100\_H9UDX8 . . . . . V E Q I K N . . S I N N V L A T L F G M T C D G A K R S C A L K A S I G T Q M A L N S V K L S L N . . . D . T N I P C G N  
UniRef100\_I2BBH1 . . . . . Y . N T I A M . . A I S S M I G D V S G M I C D G A S N S C A M K V S T S A A T A W K A V L M A L D . . . D . T A V T G H E  
UniRef100\_I4BXX4 . . . . . M . T K V E E . . A I K I H L S N L V G M I C D G A K G T C A L K V G T G A Y E A F M A A M A I E . . . G . T K L E A P Q  
UniRef100\_I4C9A0 . . . . . A . R R I L G . . A V S N V V G S I S G M I C D G A K E G C A Y K V A L A S G W A I K M A L L S M R . . . G . S V I S A T N  
UniRef100\_I4DB99 . . . . . Q E I Q T . . A I Q N M Q G N V A G M F C D G A K A G C A L K L S T C T S T A V Q S A V M A I K . . . G . I A I Q S T D  
UniRef100\_I4Z7Z1 . . . . . F . D N I C N . . A V K N M I A N L T G I I C D G A K P S C A L K I S S G V S T A V L S A M L S I E . . . G . K C V S S A E  
UniRef100\_I8TRS2 . . . . . A D Y . D V I G K . . T I I N A L G N V G G I V C D G A K A S C A A K I S S A V D A G I M G Y E M A K . . . S N . I V F P F G E  
UniRef100\_I9DKN7 . . . . . F . E T V S M . . A I S N M I G D V A G I I C D G A S N S C A M K V S T S A T A Y K A V L M A L E . . . G . I R V T E Y E  
UniRef100\_I9LEV3 . . . . . F . K T V S M . . A I S N M I G D V A G L I C D G A S N S C A M K V S T S V M S G Y K A V L M A L E . . . G . I R V T E N E  
UniRef100\_I9NNL2 . . . . . F . R V V S M . . A I S N M I G D L A G L I C D G A S N S C A M K V S T S V M S G Y K A V L L A L E . . . G . I R V T G N D  
UniRef100\_J5W633 . . . . . E Q I K G . . S C N N L L A N L T G M I C D G A K D N C S L K L A S S A S E A V I S S Y L A I N . . . G . V I V N K N V  
UniRef100\_J7IVN5 . . . . . A E V M S . . A I Q N M Q G N T T G M F C D G A K A G C A M K L S T C T S A A V Q S A I M A V Q . . . G . K T I Q S T N  
UniRef100\_J9GDW5 . . . . . Y E Q V S Y . . A V Q N M I A N L T G M I C D G A K P S C A L K V S T G V S T A V L S A I M A M E . . . N . R C V T S V E  
UniRef100\_K0G6A3 . . . . . F . E A I S M . . A I S S M I G D I S G I I C D G A A N S C A M K V S T S V S S S Y K S I L M A L D . . . D . T Q V T G N E  
UniRef100\_K2APZ2 . . . . . P E V I G R . . A I D Y V A G A I S G M T C D G A K G S C A L K V G V S V E T A I Q A A I A A V Y . . . S P E Y L L R R Q  
UniRef100\_K4LJ29 . . . . . R E I T A . . A V N N L A G N L S G M V C D G G K P G C A F K V S T S A E A V L A S L L S I N . . . G . V E I G R T Q  
UniRef100\_K6E323 . . . . . Q Q I K G . . A I Q N T I G N V S G M I C D G A K A G C A M K V S T C S N V A V Q S A L L A I N . . . H . Q E I Q S T D  
UniRef100\_K8W9S4 . . . . . Y . D V V S M . . A I C S M I G D V S G M I C D G A S N S C A M K V S T S A S A Y K A V L M A I D . . . N . S C V R G S D  
UniRef100\_K8WWJ1 . . . . . Y . E V V A M . . A I S S M I G D V S G M I C D G A S N S C A M K V S T S A S A Y K A V L M A I D . . . N . S C V R G S D  
UniRef100\_L0RBQ4 . . . . . T . A Q M A G . . A I T N L T E D L A G I I C D G A K S G C A L K L A T A A G T A Y Q A A L F A T H . . . G . V N V H T D  
UniRef100\_L1NAI7 . . . . . K . E Q S I G . . A V K N M I G N V S G M I C D G A K P S C S L K A S T G V S S A I L S A L L A M E . . . G . H V V T A N E  
UniRef100\_M1E6N6 . . . . . N . K K V E Y . . S I K N V I S G L S G M I C D G A K I G C A Y K I Y L S S L S A I E A S N M A I N . . . G . I V I P S D N  
UniRef100\_M1PWB2 . . . . . L E D A L H . . T T R N M L G T I T G I I C D G A K D G C A Y K V A L S S R W A V Q S A L L A F D . . . N . T F I P S K D  
UniRef100\_M4U7A2 . . . . . F . E Q C S Y . . A I Q N V L G D C T G M I C D G A K S T C A M K V R T T S S A I Y G A L L A I N . . . S . T E A N D Q  
UniRef100\_M4UMF1 . . . . . Y . K Q S C Y . . A I Q N V L G D C T G M I C D G A K S T C A M K V R T T S S A I Y S S L L A I N . . . S . T G T K D Q  
UniRef100\_N1ZBI4 . . . . . G S . Y . E D I T H . . T I V N A L A I T S G I I C D G A K A S C A A K I A S S A V D A G I F G Y D M Y L K . . . G . Q Q F Y G G D  
UniRef100\_N2BUJ8 . . . . . G S . L . A Q F E A . . T V V N T L A N V G G I V C D G A K P S C A A K V S A S V D A A I L G C D M A L . . . S D . H N F K A G D  
UniRef100\_Q0W4W4 . . . . . E E I T H . . A M Q S V I G T L A G M V C D G A K E S C A F K L S S S V A L A I F G H L S L E . . . . D A Y I K E G M  
UniRef100\_Q6AQQ3 . . . . . L Q Q V E G . . A I K N I L E D L A G V I C D G A K A G C A I K L N T A G A A V Q A A L F S L Q . . . G . V S V K D T D  
UniRef100\_R5ACV9 . . . . . A Q V S G . . A V Q N M M G S V A G I F C D G A K G C A V K V A A C A S E A V Y A A M Y A M D . . . G . S V I G V S D  
UniRef100\_R5BH02 . . . . . Y . D Q V C S . . A I K N M I G N I T G M V C D G A K V G C A M K V A S G V A C A V Q S C V L A I R . . . G . T C I K E T D  
UniRef100\_R5BSN7 . . . . . Y . K E V T Y . . A V K N M I A N L T G M I C D G A K P S C A M K L T S G V S T A V L S A M M A M E . . . H . E C V S C V E  
UniRef100\_R5CBC5 . . . . . Y . D Q M A F . . A V K N M I A N L T G M I C D G A K P S C A L K L T S G V S T A V L S A M L A I Q . . . N . K H V T S V E  
UniRef100\_R5D1I4 . . . . . G T . T . E A V S A . . T I T N T L G M I S G T V C D G A K P S C A A K I A S A V E A G L L G F D L Y E N . . . G . K G L H G G D  
UniRef100\_R5D3N9 . . . . . G D . Y . D T V A H . . T V V N T V A M D S G I I C D G A K A S C A A K I A A A V D A G L L G L A M Y R S . . . G . N Q F F G G D  
UniRef100\_R5DQG3 . . . . . D I A V H . . A M Q T V L G T I G M F C D G A K I S C A Y K L S T A A S L A V Q A A Y L A R E . . . G . G C F V P A G V  
UniRef100\_R5GEI3 . . . . . Y . R E V T Y . . A V K N M I A N L T G M I C D G A K P S C A L K L T S G V S T A V L S A M L A M Q . . . G . N C V S S E  
UniRef100\_R5GWZ7 . . . . . K . E A M R A . . G V R T M A A D L S G M I C D G A K P G C A L K I A T S V N A A A L A A Q L A I N . . . G . T G A T K R D  
UniRef100\_R5JAL6 . . . . . Y . S K I T Y . . A V K N M I A N L T G M I C D G A K P S C A L K L T S G V S T A I L S A L L A I E . . . N . K C V S S V E  
UniRef100\_R5JHT1 . . . . . G G . F . K E I A H . . T V V N S L A I V S G I V C D G A K A S C A A K I A S A V E A G I L G Y N M Y I R . . . G . Q Q F Y G G D  
UniRef100\_R5IJT6 . . . . . G G . Y . E H I K H . . T L V N A M A I T S G I I C D G A K P S C A A K I A T S V D A G L L G Y H M Y R C . . . G . N Q F Y A G D  
UniRef100\_R5LQS8 . . . . . Y . E Q M S Y . . A V K N M I A N L T G M I C D G A K P S C A L K L T T G V S T A V M S A M L A I Q . . . N . K H V T S V E  
UniRef100\_R5LUG8 . . . . . G G . F . E E I A H . . T L V N A I A I T S G I I C D G A K A S C A A K I A A S V D A G I L G W N M Y R N . . . G . Q Q F Y G G D  
UniRef100\_R5M5F0 . . . . . A G . Y . E E I S R . . L I T N T I A T I G M V C D G A K P S C A A K I A S A V D A C I T A M E L A R Q . . . G . L S F Q P G E  
UniRef100\_R5MFC7 . . . . . Y . Q Q V M Y . . A V Q N M I A T L T G M I C D G A K P S C A L K L T S G V S T A V M S A I M A M E . . . Q . K C V T S V E  
UniRef100\_R5QVY3 . . . . . G R . Y . K E I A H . . T L V N S L A I L S G T I C D G A K A S C A A K I A A A V D A G I L G Y F M Y K D . . . G . Q Q F I D G D  
UniRef100\_R5R9I7 . . . . . Y . E K M C K . . A I S T M V A D I S G V V C D G A K A G C A L K V A T A V D S A M R A A N M A M C . . . G . I G A D S K D  
UniRef100\_R5TDG1 . . . . . M Q . S . D V I E K . . T I T N T I C T I G M V C D G A K A S C S A K I A A A L N T A P L S F D L A K R . . . G . M V F E T G D  
UniRef100\_R5WS06 . . . . . G D . E . K O I S D . . T I V N T L A N V S G I I C D G A S A S C A A K I A S S V D A I T M G S I L A R E . . . K . T V F E T G D  
UniRef100\_R6ACZ6 . . . . . Y . E Q V T F . . A V K N M I A N L T G M I C D G A K P S C A M K L T T G V S T A V L S A M L A M Q . . . G . N C V T S V E  
UniRef100\_R6BEE9 . . . . . G D . Y . D T I A H . . T L V N S L A I V S G I V C D G A K A S C A G K I A A A V N A G I L G Y N M Y L N . . . G . S Q F W A G D  
UniRef100\_R6BNM8 . . . . . P E V E N . . C V F N M I G N V T G M L C D G A K A D C A L K I A T C T N A A M Q S A L M A M R . . . G . I R V L S T D  
UniRef100\_R6CEX6 . . . . . Y . Q Q V I Y . . A V Q N M I A T L T G M I C D G A K P S C A L K L T S G V S T A V M S A I L A M E . . . Q . K C V T A V E  
UniRef100\_R6CRH6 . . . . . R E E R I H A . . V I N N M A S S I T G M I C D G G N H G C V M K G L A A V D A M W R A N N L A R C . . . F . V M I E S I H  
UniRef100\_R6DX46 . . . . . Y . E R V C R . . S V K N M I A N L T G M I C D G A K P S C S L K I A S G V S T A I L S A L L S M E . . . G . K C V S S A E  
UniRef100\_R6ES56 . . . . . A D Y . S K I C R . . T I S N T L G N V G G I V C D G A K A S C A A K I A S S L D A A F L G Y D M A E . . . D D . L G F K P G E  
UniRef100\_R6F8Q0 . . . . . Y . E H I C W . . S V K N M I A N I T G M I C D G A K P S C A L K I S S G V S T A I L S A L L S M E . . . G . K C V S S V E  
UniRef100\_R6GFV4 . . . . . G . N L . D A V S T . . T V S N A L A I T S G I V C D G A K S S C A A K I A V S V E A G I L G Y H M Y L N . . . E . R K F L P G D  
UniRef100\_R6IAL3 . . . . . A T . L . E I G H T . . T I T N A V G V T S G M I C D G A K A S C A G K I A N S V E A G I T G Y N M C K T . . . G . N N Y Q P G D  
UniRef100\_R6PJ67 . . . . . G . G Y . E E V I H . . T V V N A L A I V S G I V C D G A K A S C A A K I A S A V D A G I L G Y N M Y K R . . . G . Q Q F Y G G D  
UniRef100\_R6QZ08 . . . . . Y . Q R I C N . . S V K N M V A N L T G M I C D G A K P S C S L K I S S G V S T A I L S S L L A M E . . . G . R C V T S A E  
UniRef100\_R6RRH2 . . . . . G D . F . D A V I H . . T V V N A L A V I S G M V C D G A K A S C A A K I A E S V D A A I L G Y N M Y V K . . . G . Q F Y G G D  
UniRef100\_R6SUK7 . . . . . Y . E E V C Y . . A I K N M I G N I T G M V C D G A K V G C A M K V A S G V S S T Q S A V L A I Q . . . G . T H A C E T D  
UniRef100\_R6TKV7 . . . . . G R . Y . D V I A H . . T I A N T L A I C A G M I C D G A K P S C A A K I A A A V D A G L G Y E M Y M H . . . G G . H E F V G G E  
UniRef100\_R6WIA0 . . . . . G . S V . A Q I K A . . T I D N T L A N I P G I I C D G A K I S C A A K I A S S I D A G M A H Y L A M N . . . H . K A Y K A Y T  
UniRef100\_R6WIM5 . . . . . . . E M M K H . . T I N N M A S S I T G M I C D G G N Q G C T M K G I A A V D A A Y Q S V D F A M H . . . G . I Y I Q D V H  
UniRef100\_R6X2B6 . . . . . Y . D D L C H . . A V K N M I A N L T G M I C D G A K P S C S L K I C S G V S T A I L S A L L A R E . . . G . K F V T S A E  
UniRef100\_R6XH18 . . . . . Y . Q R I C N . . A V K N M V A N L T G M I C D G A K P S C A L K I S S G V S T A I L S A L L S M E . . . G . K C V T S A E  
UniRef100\_R6XH36 . . . . . F . E Q I C F . . S V K N M I A N L T G M I C D G A K P S C A L K L T S G V S T A V L S A M L A M Q . . . H . K Y V T S Y E  
UniRef100\_R6XLK2 . . . . . G . G Y . D E V I H . . T V V N A L A I V S G M V C D G A K A S C A A K I A S S V D A G I L G Y N M Y L N . . . G . Q Q F Y A G D  
UniRef100\_R6YNU0 . . . . . Y . E Q V A Y . . A V K N M I A N L T G I I C D G A K P S C A L K L T S G V S T A V L S A I L A M E . . . Q . K C V T A V E  
UniRef100\_R6ZPY0 . . . . . G T . R . E Q I G A . . T V V N T L G N V G G I V C D G A K S S C A A K I A S A V D A A I L G H S M A M . . . A G . K S F H A G E  
UniRef100\_R7A8V9 . . . . . G D . F . E A V C R . . T V S N T L A V T P G M I C D G A K P S C A G K I A M A V E A G I M G C R M N A E . . . G . E K F L C G D  
UniRef100\_R7CZU5 . . . . . Y . Q Q A V Y . . A V K N M V A N L T G M L C D G A K P S C A M K L S T G V S T A V L S A M M A M Q . . . Q . R Y V T S V E  
UniRef100\_R7D3W1 . . . . . G T . R . E Q I G A . . T V S N T L G N V G G I V C D G A K A S C A A K I A A A V D A A I L G H D M A M . . . Q Q . R G F R A G E  
UniRef100\_R7D3Y4 . . . . . G T . Y . Q Q V S L . . T I I N T L G N V G G I V C D G A K P S C A A K I A S S V D A A I M A F Q L S I . . . Q N . K S F L P G E  
UniRef100\_R7DCY6 . . . . . Y . P O I T A . . A V K N M I A N L T G M I C D G A K P S C A L K L T S G V S T A V L S A I L A M E . . . Q . K C V T S V E  
UniRef100\_R7ECU3 . . . . . G G . Q . K E G E H . . A I V N G L A I V S G M I C D G A K A S C A A K I A S S V D A G I L G Y F M Y K N . . . G . Q Q F I G G D  
UniRef100\_R7GDN4 . . . . . G S . I . D L I S Q . . T I V N A L G I S G M V C D G A K P S C A A K I A E A I D S A I L L G Y Y M A I H . . . N . E R F K S G E  
UniRef100\_R7J033 . . . . . Y . D R V V A . . T I K N M V A T L T G M I C D G A K P S C A L K L A S G A V S T A V S L A L V A M E . . . G . H C V T P L E  
UniRef100\_R7KN91 . . . . . F . E Q C C M . . A I N N V I S D T S G M V C D G A K S T C A M K V H T A A Q T A Y K C C F L A L A . . . G . H G V E G Q  
UniRef100\_R7LE14 . . . . . Y . E Q M T Y . . A V K N M I A N L T G M I C D G A K P S C A L K L T S G V S T A V L S A M L A M Q . . . G . N C V S E V E  
UniRef100\_R7P9Q6 . . . . . Y . R E V C Y . . A V K N M I A N L T G M I C D G A K P S C A L K L T T G V S T A V L S A M L A M Q . . . G . N C V S P V E  
UniRef100\_R9IHK8 . . . . . G . T V . G O I K A . . T I D N T L A N I P G I I C D G A K I S C A A K I A S S L D A S M M A H Y L A M Q . . . G . K E Y E S Y T  
UniRef100\_R9KQV6 . . . . . G D . V . S E I T H . . T V V N A V A I S G M I C D G A K A S C A A K I A S A V E A G L L G M Q M Q K S . . . G . S Q F H S G D  
UniRef100\_R9LK03 . . . . . G S . Y . E A I A H . . T I V N A V A M I S G T I C D G A K P S C A A K I A A S V D A G I L G Y S M Y K N . . . H . Q E F K S G D  
UniRef100\_R9LSX6 . . . . . G D . Y . D T I G R . . T I T N T L A N V S G I V C D G A K G S C A A K I A A S V D A A I L A H E M S M . . . D G . N T F F A G E  
UniRef100\_R9MC34 . . . . . G . G Y . E E V V H . . T V V N A L A I V S G M V C D G A K A S C A A K I A A S V D A G I L G Y N M F L R . . . G . Q Q F Y A G D  
UniRef100\_R9MFU5 . . . . . . . R O I G M . . V I R N M A S S L T G M I C D G G N H G C A M K G I V S V D A A Y R A V D L A M Q . . . D . A G I G E I H  
UniRef100\_R9MHL4 . . . . . G D . F . E T V A H . . T L V N A L A I S G M I C D G A K S C A A K I A A A V D A G L L G Y H M Y R S . . . Q . Q Q F Y G G E  
UniRef100\_R9MSX2 . . . . . . . Q T V C T . . T L V N M A S S L T G M I C D G G N H G C A M K G I V A D A A P R A V D L A I K . . . G . I G V A S V H  
UniRef100\_R9NAH4 . . . . . D . V O I K A . . S V I N M L A G L T G M I C D G A K L G C A C K L S V A D A A V D S A D L A I A . . . D . Y I P G D N  
UniRef100\_R9NHG8 . . . . . G . G Y . E E I K H . . T V V N A L A I V S G I V C D G A K A S C A A K I A S S V E A G I T V G Y M Y L N . . . E . Q E F C A G E  
UniRef100\_R9NLL3 . . . . . G . G Y . E E A V H . . T V V N A L A I V S G M V C D G A K A S C A A K I A A S V D A G I L G Y N M Y L R . . . G . Q Q F Y A G D

UniRef100\_R9PQG9 . . . . . L . AA IHR . . . A I N S M V G D V S G V F C D G A K A G C A M K V S T G A S S A V K S A I L A V A . . . G . S S V S A Q Q  
UniRef100\_S2YDF7 . . . . . G E . E . E Q I E N . . . T V I N T I A N I G S G M V C D G A K P S C A A K I S S A L Q S A I L G H E M A M . . . R G . I R F E A G D  
UniRef100\_S3JMX3 . . . . . G D . E . D A I A R . . T I A N T L G D V G G V C D G A K P S C A A K I S S A V D A A I L G F E L G S K . . . E G . V A F Q K G E  
UniRef100\_S8F9Z3 . . . . . Y . E Q I T F . . . A V K N M I G N I T G M I C D G A K P S C S L K V T S G T S A I L S S I L A I E . . . H . Q C V T P A E  
UniRef100\_U1Y408 . . . . . E . A Q L E A . . . A V N N M I A M L O G M I C D G A K A T C A L K I A A G T N A A V H C S A L A I A . . . D . I S P S S L D  
UniRef100\_U2B5S0 . . . . . G D . L . E A V N H . . . T I V N A L A I V S G I I C D G A K P S C A A K I A S S V D A G I L G Y A M Y R E . . . G . Q O F Y G G D  
UniRef100\_U2BQN1 . . . . . A S . Y . D E I C G . . . I I T D T I A T I G M V C D G A K P S C A A K I A S A V D C A I T A F H L S K N . . . K . R V F Q P G E  
UniRef100\_U2BR63 . . . . . G D . L . R T I S H . . . T I V N C L A I A S G I V C D G A K A S C A A K I G M S V E A G L L G Y L M I E Q . . . D . Q Q F R A G D  
UniRef100\_U2EG06 . . . . . . . . . . . E K I K A . . . A I Q N M L G N V T G M L C D G A K A G C A L K V S T C T N A A V H S A I L A M Q . . . G . I S I K S T A  
UniRef100\_U2IN24 . . . . . . . . . . . Y . I N V C H . . . S V K N M I A N L T G M I C D G A K P S C S L K I S S G V S T A I L S A T L S M E . . . G . K H V T A A E  
UniRef100\_U2IPU0 . . . . . . . . . . . K . E O S I G . . . A V K N M I G N V S G M I C D G A K P S C S L K A S T G V G S A M I S A M L S M Q . . . G . H V V T A T E  
UniRef100\_U2LC73 . . . . . . . . . . . E E I T H . . . A C N A I F A N L A G M I C D G A K D T C A L K L S T C A N E A V I T A Y L A S R S . . . G . M N I K Q S V  
UniRef100\_U2SXB7 . . . . . . . . . . . V R . F . D V I S R . . . T I S N T L A I C S G M I C D G A K S S C A A K I A S A V E A G I L G Y R M S R S . . . R G . F V D G E  
UniRef100\_U2TE26 . . . . . . . . . . . . . . . . . R Q M A E . . . S I N N M A G S I T G M I C D G G N Q G C T M K G V V A V D A A W Q S V E M A M Q . . . D . V F I D S V H  
UniRef100\_U4KEH0 . . . . . . . . . . . . . . . . . Y . K O S C Y . . . A I Q N V L S D S S G M I C D G A K S S C A M K V C T S S T A A V R S F M M A L C . . . D . N V V T G Q  
UniRef100\_U5MNA1 . . . . . . . . . . . G G . Y . K E I S H . . . T I V N A L S I V S G I V C D G A K S S C A A K I A A G V D A G I L G Y N M Y K N . . . G . Q O F K D G D  
UniRef100\_U7UAT0 . . . . . . . . . . . . . . . . . I Q I E H . . . A I S N I G A I G G T L C D G A K N G C A I K L S T S I G V A I T E N V M L V K S . . . G . A Y I N N D  
UniRef100\_U7UUA7 . . . . . . . . . . . H . G L . E R I G Q . . . V I C S M T G D V A G M I C D G A A N S C S M K V S T A V S A Y K A T V L A I N . . . G . T R V S G D D  
UniRef100\_U7UZ37 . . . . . . . . . . . . . . . . . E Q I A G . . . A P T N I Y A N L T G M V C D G A K E S C S M K L S T S A E E A I L A A Y L A V N . . . G . M T S K E S V  
UniRef100\_UPI0001A275D4 . . . . . . . . . . . . . . . . . A D . Y . E O C I A H . . . T I V N S L A I T S G I I C D G A K S S C A A K I A A S V D A G I L G Y K M Y L D . . . G . Q E F K D G D  
UniRef100\_UPI0001BACF7A . . . . . . . . . . . . . . . . . F . E O S C Y . . . A I Q N V I S D T A G M V C D G A K S S C A M K V C T S S S A A V R S F M M A L H . . . N . T I F V S G Q  
UniRef100\_UPI0002088B6F . . . . . . . . . . . . . . . . . F . E O S I S A . . . A I C S M I G D I T G I I C D G A K A S C A M K V S S A A G S A V K S A L M A L D . . . G . T R V T G C E  
UniRef100\_UPI000230D429 . . . . . . . . . . . . . . . . . F . E O S C F . . . A I Q N V I S D S S G M V C D G A K A S C A M K V S T S S S A A V R S F L M A L S . . . S . H N V S P G D  
UniRef100\_UPI00023278AC . . . . . . . . . . . . . . . . . E G . . . E K I I R E . . . L I T N S L V V N S G L I C D G A K P S C A M K I A S S L R N A F L A Y Q Q A K A . . . G . K S F Q P G D  
UniRef100\_UPI00024355AF . . . . . . . . . . . . . . . . . Y . S A V E R . . . A V A S M T G D V V G M V C D G A C S C A L K V S A S V N S A G R A A L L S I A . . . G . R R V P G T N  
UniRef100\_UPI000283269A . . . . . . . . . . . . . . . . . Y . E P M A M . . . A I S S M I G D I S G V I C D G A S N S C A M K V S T G A S A Y K A V L M A L D . . . D . T C V T G N D  
UniRef100\_UPI000288D204 . . . . . . . . . . . . . . . . . L . E N V C Y . . . T I K N M I G D V S G M I C D G A K P G C A L K L S T A V G S S V K S A I L A T H . . . G . I E I S D K D  
UniRef100\_UPI000289A50F . . . . . . . . . . . . . . . . . E . K Y I K Q . . . S I Q N V G N I M G M V C D G A K N S C A L K I S T C V F A A I T G A I L A M E . . . D . I S I T D K E  
UniRef100\_UPI0002DD0778 . . . . . . . . . . . . . . . . . E E . . . K . D L I K E . . . T I T N A L A T N S G I I C D G A K S C A I K I A S S L K M A F L A Y K Q A K A . . . G . N S F K A G D  
UniRef100\_UPI0002E7D406 . . . . . . . . . . . . . . . . . Y . E O S C Y . . . A I Q N V L C D C T G M V C D G A K S T C A M K V R T S S S A I L N G A M L A M N . . . S . T E A H D Q  
UniRef100\_UPI0002E871F4 . . . . . . . . . . . . . . . . . . . . . K E I Q G . . . T I H N M L A N I T G M V C D G A K P S C A I K L S T S A A E A I C A Y L A Q S . . . G . T I V P T K T  
UniRef100\_UPI0002F55F5A . . . . . . . . . . . . . . . . . E S . F . E I I T R . . . T I T N T I A N V S G I V C D G A K P S C A A K I A S S V D A I M G Y H M A I . . . N G . N T A F C G E  
UniRef100\_UPI0002FE0D91 . . . . . . . . . . . . . . . . . Y . E O S C Y . . . A I Q N V L S D C S G M V C D G A K S T C A M K V R T S S S A V T A F M L A M N . . . D . T Q A F D Q  
UniRef100\_UPI000306AC01 . . . . . . . . . . . . . . . . . E D . . . R . E T I K E . . . T I T N A L A T N S G I I C D G A K S C A I K I A S S L K M S F L A Y K Q A K E . . . G . N S F K P G D  
UniRef100\_UPI00030F9BF7 . . . . . . . . . . . . . . . . . E K I A G . . . A C S N I Y A N L T G M I C D G A K E S C S L K I S T A V E S I T A Y L S I N . . . G . V V V E G N V  
UniRef100\_UPI00033F2D2A . . . . . . . . . . . . . . . . . Y . E D A C H . . . A I Q N M A G D A A G M I C D G A G C A C A M K V A T A V S S M Y R G V N L A I Q . . . G . T V I P N S N  
UniRef100\_UPI00035C15F2 . . . . . . . . . . . . . . . . . Y . K E I I S Y . . . A I Q N M I A N I T G M L C D G A K P S C S M K V A T G V S T A I L S A M M A M E . . . G . K S A T S A E  
UniRef100\_UPI0003605297 . . . . . . . . . . . . . . . . . L . A Q I K R . . . G V Q S T I A S L S G M I C D G A K A T C A L K I S T G T N A A I Q A A T L A M N . . . D . I S P S P S D  
UniRef100\_UPI000360BBA6 . . . . . . . . . . . . . . . . . V . R H I A G . . . A I K N L M E D L A G I I C D G A K A G C S L K L A T A A G T A V Q A A L F S L Q . . . G . V N V H F T D  
UniRef100\_UPI00037A36CB . . . . . . . . . . . . . . . . . N Q M S F . . . A Q M N V I G N V T G M L C D G A K A G C A M K V S T C T G A A V Q S A L L A T S . . . G . M R V P G T N  
UniRef100\_UPI00036711A8 . . . . . . . . . . . . . . . . . F . E O S C Y . . . A I Q N V I S D S S G M V C D G A K S S C A M K V C T S S T T A V R S F M M A I R . . . N . H C A A G Q  
UniRef100\_UPI000369B3C4 . . . . . . . . . . . . . . . . . K P K T V E M . . . A I K N V A N L T G M I C D G K V G C A L K L S T A A A T A E S S L M A V R . . . G . T V V P D S N  
UniRef100\_UPI00036A4FE1 . . . . . . . . . . . . . . . . . T . L H I A G . . . A I T N L I E D L A G V I C D G A K P G C A L K L A T A A G T A V H S A L F A I Q . . . G . V R V Q A T D  
UniRef100\_UPI00036E7A0B . . . . . . . . . . . . . . . . . K . E Q I G F . . . A I K N M G N L T G M I C D G A K P S C S L K V T S G V S A A M L S A L L A M E . . . K . R V V T S N E  
UniRef100\_UPI00037081CA . . . . . . . . . . . . . . . . . G D . Y . D V I G R . . . T I L N S L G N V G G I V C D G A K A S C A A K I S S A V D A G I M G Y E L A K . . . R E . R F F P F G E  
UniRef100\_UPI000372957C . . . . . . . . . . . . . . . . . . . . . K E I V H . . . I I N N S A G I T G M I C D G G N Q G C V M K A I V A L D A G P R A A E L S L S . . . G . S Y I F P I H  
UniRef100\_UPI0003733871 . . . . . . . . . . . . . . . . . A A D N A S P D L . Y . D V V S R . . . T I T N S L G T I S G M V C D G A K S C A S K I A C A L E C S I T A L E M S L D . . . G . L A F P S G E  
UniRef100\_UPI0003747996 . . . . . . . . . . . . . . . . . L . E Q I K H . . . G I Q N T I A S L S G M I C D G A K S T C A L K I S T S T N A A T Q A A T L A M N . . . N . L S P S T K D  
UniRef100\_UPI0003789E31 . . . . . . . . . . . . . . . . . Y . E E I A M . . . T I Q N S L S G V T G M I C D G A K S S C A L K I A T A V Q S T I L S S L L A Q . . . H . Y T I A G G E  
UniRef100\_UPI000378C8B9 . . . . . . . . . . . . . . . . . Y . K D V C H . . . A V K N M I A N L T G M I C D G A K P S C S L K I C S G V S T A I L S A L L A R E . . . G . K Y V T S A E  
UniRef100\_UPI00037A28E2 . . . . . . . . . . . . . . . . . A D . Y . D V I G K . . . T I L I N T L G N V G G I V C D G A K A S C A A K I S S A V D A G I M G Y E M A R . . . R D . L F F P F G E  
UniRef100\_UPI00037A36CB . . . . . . . . . . . . . . . . . G N . F . N Q I A N . . . T I I N T L A N T S G I I C D G A K P S C A A K I S S A L D A I L L A H T M S M . . . H D . V F V H A D E  
UniRef100\_UPI000380DDF6 . . . . . . . . . . . . . . . . . Y P . Y . D V L C S . . . T I T N T I G T V S G M V C D G A K S S C A A K I S T A L Q T A I L L G K M S H . . . E . R S F Q P G E  
UniRef100\_UPI0003819044 . . . . . . . . . . . . . . . . . A D . N . E G I A H . . . T I V N A L A S V S G I I C D G A K P S C A A K I A S S V E A G I L G Y H M Y L N . . . G . Q E F R G G D  
UniRef100\_UPI0003981C8F . . . . . . . . . . . . . . . . . G D . F . E A I C R . . . T V V N T L A D V S G V V C D G A K P S C A A K I A S A V D A A I L S H C M S L . . . Q N . R T F G A T E  
UniRef100\_UPI0003A134FF . . . . . . . . . . . . . . . . . . . . . E Q M Y F . . . A I Q N T L G N V T G M L C D G A K A G C A M K V S T C S G A A V Q A A L M A K K . . . N . I C I P G N E  
UniRef100\_UPI0003A4ECDD . . . . . . . . . . . . . . . . . G T . Y . K M V C A . . . S I T N I L G N L S G V I C D G A K A S C A M K I S S G I Y S A F D A A M L A I Q . . . M . D T L N P R D  
UniRef100\_UPI0003ADDECF . . . . . . . . . . . . . . . . . G D . N . A A I A R . . . T I T N M L G N V S G I V C D G A K P S C A A K I A S S L Q A A I L A H K M A M . . . K D . R S F K G G E  
UniRef100\_UPI0003B30D5B . . . . . . . . . . . . . . . . . G R . F . R E V A H . . . T I V N A L A T S G I I C D G A K P S C A A K I A S S V D A G I L G F H M F Q K . . . G . Y Q F Y G G D  
UniRef100\_UPI0003B725E4 . . . . . . . . . . . . . . . . . . . . . M G L F F D . . . A P K N Y I Q G V A G V F C D G A K P G C S S K A L L A E D M A I K S I E L A E E . . . G . V I Q S E K D  
UniRef100\_UPI0003B779DB . . . . . . . . . . . . . . . . . A . R H V S G . . . A I K N L V A D L A G V I C D G A K A A C A L K L N T A A G S A V Q S A L F A I Q . . . G . V D V A D T D  
UniRef100\_UPI0003BE4938 . . . . . . . . . . . . . . . . . I . E T I N T . . . A I I N M I S D V T G M I C D G A S N S C A M K V S S V V S S A F K S V L M A M Q . . . N . R C A S A N D  
UniRef100\_UPI0003E34F48 . . . . . . . . . . . . . . . . . F . E N I S M . . . A I S S M I G D I S G I I C D G A S N S C A M K V S T S T S S Y K S I L M A M D . . . N . S Q V T G N E  
UniRef100\_UPI0003F591C1 . . . . . . . . . . . . . . . . . P . D A E Q . . . A S A Y V L S S L M G M V C D G A K T C A L K V G T A S G E A Y Q A M K L A T S . . . G . R K L T S Q Q  
UniRef100\_UPI0003F5EEC4 . . . . . . . . . . . . . . . . . G A . R . E Q I E H . . . T I I N T L A N T S G I V C D G A S A S C A A K I A S S V D A A I M A S Y L S M N . . . G . H V F L P G E  
UniRef100\_UPI0003F9F671 . . . . . . . . . . . . . . . . . G . G Y . E E V I H . . . T I V N A L A I V S G M V C D G A K A S C A A K I A A S V D A G I L G Y N M Y L R . . . G . Q O F Y A G D  
UniRef100\_UPI0003FA1CAC . . . . . . . . . . . . . . . . . V . H E H A G . . . A I K N L M E D L A G I I C D G A K A G C A L K L A T A A G T A V Q A A L F S H L . . . G . V K V K P T D  
UniRef100\_UPI0004009CE6D . . . . . . . . . . . . . . . . . G R . Y . R E I A H . . . T I V N A L A M V S G I I C D G A K P S C A A K I A M S V E A G I L G F F M F Q K . . . G . K O F Y G G D  
UniRef100\_UPI000400D5C8 . . . . . . . . . . . . . . . . . . . . . T . Q K I G G . . . A I T N H I E N T S T L I C D G A K T S C A L K V G D A A S S A V K S A L L A I N . . . G . V I V S P I D  
UniRef100\_UPI0004010F26 . . . . . . . . . . . . . . . . . G D . Y . E A I S R . . . T I T N A I G N V G G I V C D G A K P S C A A K I A S S A V D A A I M A H L A V . . . E G . Q A F S D G E  
UniRef100\_UPI000404F523 . . . . . . . . . . . . . . . . . A . E Q A E Q . . . A V A Y V L S S V M G M I C D G A K A T C S L K V G T A S A E A F M G M L L A T H . . . G . T A L S S P Q  
UniRef100\_UPI000403B2AE . . . . . . . . . . . . . . . . . G G . F . E E V V H . . . T V V N A L A I V S G I V C D G A K A S C A A K I A S S A V D A G I L G Y N M Y L R . . . G . Q O F Y G G D  
UniRef100\_UPI0004048F81 . . . . . . . . . . . . . . . . . N . Q O I E Q . . . A I K L M I G D V S G I F C D G A K P G C A L K V S T G A S A A V K A A I M A I G . . . G . S O I G A E Q  
UniRef100\_UPI000404C648 . . . . . . . . . . . . . . . . . M . E Q V D R . . . T I R N M V G N V A G M I C D G A K T G C A M K V A S A V S A G L Q S A M L A M D . . . G . I G I D R R E  
UniRef100\_UPI000407936F . . . . . . . . . . . . . . . . . . . . . A . E Q A E R . . . A V S T F V A S L L G M L C D G A K E T C S L K V G T A A A E A W N A A S L A I H . . . G . G G L R E N Q  
UniRef100\_UPI0004090118 . . . . . . . . . . . . . . . . . G S . R . E Q I M F . . . T I N T L G I V S G I V C D G A K P S C A A K I A A A L D A A I L A D K M A F N . . . D . G Y F K G G E  
UniRef100\_UPI00040EDDBF . . . . . . . . . . . . . . . . . G G . Y . K E V T H . . . T I V N A L A I V S G I V C D G A K S S C A A K I A S S I E A G I L G Y N M Y M E . . . R G . Q O F L D G D  
UniRef100\_UPI000413485D . . . . . . . . . . . . . . . . . G S . L . A Q F E A . . . T V V N T L A N V G G I V C D G A K P S C A A K V S A S V D A A I L G C D M A L . . . S D . H N F K A G D  
UniRef100\_UPI00041613C4 . . . . . . . . . . . . . . . . . L . K N I E Y . . . C I N N M L S D V S G M I C D G A K T C A L K I A T G T N A A I Q C A N L A M N . . . G . I T A T S N D  
UniRef100\_UPI0004169C4B . . . . . . . . . . . . . . . . . V . E K I G G . . . A V K N H I A C S F V A C D G A K T G C A L K V G E M V A S A V K S G L L A I G . . . G . C I V R G T D  
UniRef100\_UPI0004186BE4 . . . . . . . . . . . . . . . . . L . K D V E N . . . T I K N T L G D I A G M I C D G A K T S C A L K V A S A V E A A I N S A L L A M K . . . G . T A I P G K D  
UniRef100\_UPI00041CA3D4 . . . . . . . . . . . . . . . . . R . N Q I A A . . . A V K H L I G D L S G M I C D G A K P G C A L K L S T A A G N A V Q A S L L A I E . . . G . V T L T N S D  
UniRef100\_UPI00041E72C1 . . . . . . . . . . . . . . . . . E P . . . K . A V U E A . . . T I N N L A G T S G V V C D G A K P S C A M K I A L S V G N A I L A Y K M A R T . . . D . N N F K S G E  
UniRef100\_UPI00042019E6F . . . . . . . . . . . . . . . . . G D . Y . K T V I H . . . T I V N A L A I T S G I V C D G A K A S C A A K I A A A V D A G I L G F E M Y R N . . . G . Q O F Y G G D  
UniRef100\_UPI0004201E14 . . . . . . . . . . . . . . . . . Y . E P I S R . . . A V S S M V G D L A G M I C D G A A N S C A M K V S T S V G S A F K A V L M A I D . . . N . T G V T G Q E  
UniRef100\_UPI000422EAB3 . . . . . . . . . . . . . . . . . Y . T H V C Y . . . A V K N M I A N I T G M I C D G A K P S C S L K I C S G V S T A I L S A L L A M E . . . G . K H V T A A E  
UniRef100\_UPI000423710D . . . . . . . . . . . . . . . . . F . E O S C Y . . . A I Q N V L S D S S G M V C D G A K S C A M K V C T S S T A A V R A F L M A R R . . . N . K V V S N Q  
UniRef100\_UPI0004267E44 . . . . . . . . . . . . . . . . . E S . L . E V V A D . . . S I T N T L G N V S G M I C D G A K A S C A M K I A S S G Y A A F D S L H L S K A . . . K . K V L S N G E  
UniRef100\_UPI000427327C . . . . . . . . . . . . . . . . . F . E D V C H . . . A V K N M I A N L T G M I C D G A K P S C S L K I C S G V S T A I L S A L L A R E . . . G . K H V T S V E  
UniRef100\_UPI0004279044 . . . . . . . . . . . . . . . . . D . P L . G A I E K . . . T I A T M S G S V V G M V C D G A A N S C G M K V L A S V T S A Y E A V L L A I S . . . D . R V A G S D  
UniRef100\_UPI00044D3E81 . . . . . . . . . . . . . . . . . G G . F . E E I A H . . . T I L V S V I T S G M I C D G A K P S C A G K I A T I M A G L I G H D M F K N . . . G E . Q O F R S G E  
UniRef100\_UPI000462FF1A . . . . . . . . . . . . . . . . . D . V Q A A K . . . A M E L V L G N L V G M L C D G A K E T C S L K V G T G A F E A V Q A A E L V M N . . . G . H C I E I P Q  
UniRef100\_UPI0004639C5B . . . . . . . . . . . . . . . . . I . C K A E K . . . A M A I L V S N L V G M I C D G A K D T C A L K V G T G A Y E A Y C A A M M V L E . . . G . H E L D G P Q  
UniRef100\_UPI0004640B14 . . . . . . . . . . . . . . . . . G T . V . E Q I E H . . . T V V N T I A N V G M I C D G A K A S C A A K I A S S L Q A A I L G H Q M A M . . . Q G . I T F P P G E  
UniRef100\_UPI00046473C4 . . . . . . . . . . . . . . . . . G N . L . E Q I Q N . . . T V V N T I A D A G G I V C D G A K P S C A A K I A T S L Q A A I L S H K M A M . . . R G . I V F S S G E  
UniRef100\_UPI0004684C3B . . . . . . . . . . . . . . . . . E R . Y . E V V A N . . . S V I N T L G N V S G I I C D G A K S S C A M K I S T T T N A A F D S Y I L A K E . . . G . R F L Q G G D  
UniRef100\_UPI000469850B . . . . . . . . . . . . . . . . . Y . E Q I C H . . . S I K N M I A N L A G M L C D G A K P S C S L K V S S G V S T A I L S A L L S M E . . . G . R C V T S A E  
UniRef100\_UPI00046A0861 . . . . . . . . . . . . . . . . . Y . I K I S Y . . . A V Q N M I A N I T G M I C D G A K P S C A L K L A S G V S T A I F S A I L A M E . . . G . K C V T S V E  
UniRef100\_UPI00046E54AA . . . . . . . . . . . . . . . . . Y . A N V C N . . . S V K N M I A N L T G M I C D G A K P S C S L K I S S G V S T A I L S A T L S M E . . . G . K C V T A A E  
UniRef100\_UPI00046F39A8 . . . . . . . . . . . . . . . . . L . E Q C N H . . . A I V N V L S D C S G M V C D G A K S T C A M K V R T S T N S A V S A F L M A M H . . . S . Q H V E N Q  
UniRef100\_UPI00046F70C9 . . . . . . . . . . . . . . . . . L . Q O S N Y . . . A I I N V L S D C S G M I C D G A K S T C A M K V R T S T N S A V N G F L M Y R N . . . S . Q H V Q K Q  
UniRef100\_UPI000470DF48 . . . . . . . . . . . . . . . . . G . G Y . E E I I H . . . T V V N T L A N V S G I V C D G A K A S C A A K I A S S A V D A G I L G Y Y M A M H . . . G . Q E F V D G D  
UniRef100\_UPI000470EDDB . . . . . . . . . . . . . . . . . G G . F . E E V A H . . . T I L N S L A A I S G V I C D G A K P S C A A K I A A S V D A G I L G Y D M F I D . . . K . K E F V G G D



UniRef100\_UPI000472CED3 . . . . . Y . EQ I SY . . . SVKNMIANLTGMICDGAKPS CALKLTITGVTAVMSAM LAIQ . . . H . KYVTSVE  
UniRef100\_UPI00047853AA . . . . . DA I AA . . . AINMMLGNLAGLLCDGAKHD CALKIATTSAGEALLAAL LAEK . . . G VAMSGKN  
UniRef100\_UPI000478677B . . . . . RE I EN . . . AVHLMMGNLTGMLCDGAKYGC CALKMATTSAGA AVESAAM AALG . . . G AFLPERN  
UniRef100\_UPI000478B76D . . . . . GG . Y . RE I SH . . . TIVNALSIVSGMICDGAKAS CAAKIATAVDAGILGYH MFKE . . . G QQFRGGD  
UniRef100\_UPI000478BA9F . . . . . GD . Y . KSVIH . . . TIVNALAITSGVICDGAKAS CAAKISAAVDAGILGFE MYRN . . . G QQFYGGD  
UniRef100\_UPI00047894AD . . . . . S H I EG . . . TIKNMALITGMICDGGKVG CALKLYNAAATAYISAQ LAVE . . . G SVVPSDN  
UniRef100\_UPI00047CECD3 . . . . . L NV I QA . . . TIINMVSDISGIIICDGA SNS CAMKVSSVTMSAFKSVL MAKQ . . . G TVQSSH  
UniRef100\_UPI00047D518C . . . . . RO I EG . . . SIENMVANLSGMICDGAAG CALKLASASAAVQSAI IAKH . . . E CFVPSMN  
UniRef100\_UPI00047E2814 . . . . . I PO MEL . . . AITHMMGNLAGLICDGAIG CAMKAMTGVAAAFRSAE LAIS . . . G FGIPETD  
UniRef100\_UPI00047F7DC2 . . . . . I EE I CG . . . AIKNMIAITSGMICDGA LG CAYKLIISVSSALDAAK MAVD . . . N IFIPSN  
UniRef100\_UPI0004800CCA . . . . . KTLTLL . . . VIONMASSITGMICDGGNHG CAMKGIVAVDAAYQSVN LALC . . . G IAIERQH  
UniRef100\_UPI000480F58B . . . . . KE I TN . . . IINNMASGITGMICDGGNQG CTMKGIVATDSAFRSVE LAMN . . . N FISISNH  
UniRef100\_UPI0004812F9D . . . . . EO I EG . . . AIONMIAIDLSGMICDGA KPG CALKLISSAASAMQSAI IAKQ . . . D CLVPSQN  
UniRef100\_UPI000481BD86 . . . . . KD . Y . SAVIH . . . TIVNALAITSGIVCDGAKAS CAAKISAAVDAGIMGFE MFRN . . . G QEFYGGD  
UniRef100\_UPI0004835BDC . . . . . E PC I TR . . . AINNVIEDLGGVLC DGAKTG CALKLATTAAGSAVQAAL LAHR . . . G VGAVPV  
UniRef100\_UPI000483D566 . . . . . GT . Y . ED I AH . . . TVVNALIDS GMVCDGAKAS CAAKIASAVEAGILGLK MREN . . . G SEFFGGD  
UniRef100\_UPI00048407FB . . . . . AD . Y . N I I TS . . . TITNALCTIGMVC DGAKAS CASKISEAVDCGILAYN LAK . . . DG KVF KSG  
UniRef100\_UPI00048572F0 . . . . . Y . EH V CR . . . SVKNMIANLTGMICDGA KPS CSLKITS GSVTA VLSAL LME . . . G KCVTSE  
UniRef100\_UPI000486D379 . . . . . KO I LA . . . APNLVLGDVTGMVCDGA KHG CSLKLSTAA SVAIESAL LAMK . . . N IDVPAS  
UniRef100\_UPI000487A125 . . . . . L KN I NY . . . AIKNMIGDISGIIICDGA KT CALKIATGINAATQCAT LAIN . . . D IEPRES  
UniRef100\_UPI0004893023 . . . . . F ES I TY . . . SIKNMAGNVGMICDGA KTG CALKVSTGVSAATQSA L LAIE . . . K IBIGET  
UniRef100\_UPI000489DAAC . . . . . EO I EG . . . TVQNMLANLTGMVC DGAKE CAIKLSTSSAEAVLSAY LSH . . . N TVVPVK  
UniRef100\_UPI0004876FC . . . . . I EO V SA . . . AICSMIGDVS GVICDGA KTA CAMKVSSAGAAVKAAL MAID . . . G RVTGT  
UniRef100\_UPI000486FC1 . . . . . A RH I AG . . . SIKNMLDLAGVICDGA KT CALKLATTAAGTAVQAAL FSLH . . . G VNVQDT  
UniRef100\_UPI0004880C16 . . . . . SE I KA . . . AIONMMLGNVTGMMCDGA KGG CAMKVATCTSAAGVQSA L LASK . . . G MITSSTN  
UniRef100\_UPI000491433C . . . . . ET . P . EV I NH . . . TIANTLGSVSGIIICDGA KPA CASKIAASVEAGILGFH MARK . . . G QHFQAG  
UniRef100\_UPI00049711BC . . . . . GD . L DV I NH . . . TLVNS I V I SGMICDGA KPS CAGKIATTSVQAGIFGYE MYQN . . . G QQFKKG  
UniRef100\_UPI000497B560 . . . . . GD . Y . KAVIH . . . TIVNALAITSGIVCDGA KAS CAAKISAAVDAGILGFE MYRN . . . G QQFYGGD  
UniRef100\_UPI0004B019E5 . . . . . Y . EO V SF . . . AVQNMIANLTGMICDGA KPS CALKVITGVSTAVLSAM MAME . . . N RCVTSV  
UniRef100\_UPI0004B06938 . . . . . GD . Y . ES I AH . . . TIVNSLAMISGMVC DGA KSS CAAKIAEAVDAGILGFK MSKN . . . G QQFVGD  
UniRef100\_UPI0004B0E061 . . . . . HD . R . EV I KE . . . TILSNALAVNSGIIICDGA KPS CAMKIASIRNGFLAME QAES . . . N NSF KAG  
UniRef100\_UPI0004B27D60 . . . . . AD . Y . KTI I SQ . . . TLVNSLA I ASGIIICDGA KPS CAAKIALSVNAGIMGFE MCQY . . . G QKFHGG  
UniRef100\_UPI0004B2B5C4 . . . . . GD . Y . QTI I AH . . . TLVNSLA I NSGIVCDGA KPS CAAKIAESVDAGILGYY MYKN . . . G YQFKGG  
UniRef100\_UPI0004B2C343 . . . . . AD . D . DTTAH . . . AIVNTLGNVSGIIICDGA KPS CAMKIATGIYA AFDSAT LASY . . . H RDLHGG  
UniRef100\_UPI0004B65006 . . . . . Y . EO I SY . . . SVKNMIANLTGMICDGA KPS CALKLTITGVTAVMSAM LAMO . . . H KYVTSVE  
UniRef100\_UPI0004B82859 . . . . . QP L . S V I ED . . . TITNSLLNVSGIVCDGA KPS CAAKISSVDAAFMGYH MAL . . . EG NRYLPGE  
UniRef100\_UPI0004BA18BC . . . . . G Y . DE I SQ . . . TIINTICTAGGIVCDGA KSS CAAKIAASVDAAILTGWQ MASK . . . Q RVFPGE  
UniRef100\_UPI0004D3CAB1 . . . . . Y . ET I SM . . . AISSMIGDVS GMICDGA SNS CAMKVSTSSAAWKAVL MALD . . . D TAVTGN  
UniRef100\_UPI0004E19D09 . . . . . S SO M AG . . . AITNITEDLAGIICDGA KSG CALKLATTAAGTAVQAAL FAIH . . . G VNVHST  
UniRef100\_UPI0004F930DE . . . . . L EO I KH . . . GIQNTIASLSGMICDGA NST CALKISTSTNTATQAAT LAMN . . . N IAPTTKD  
UniRef100\_UPI000509BABF . . . . . K KA I NH . . . SVKNMIAGLSGMICDGA KQG CALKISTTSVSSAQSAV LAIN . . . D IEVSKD  
UniRef100\_UPI00051B6669 . . . . . GD . Y . KAVIH . . . TIVNALAITSGIVCDGA KAS CAAKISAAVDAGILGFE MYRN . . . G QQFYGGD  
UniRef100\_UPI00051BE5E1 . . . . . GR . Y . DE I AH . . . TIVNALA I NSGMLCDGA KAS CAAKIASAVEAGILGMQ MYRH . . . D SQFYAG  
UniRef100\_UPI00051BFE97 . . . . . GG . F . EE I AH . . . AVVNGVA ILSGTICDGA KSS CAAKIAMAVEAGILGYD MYRN . . . G QEFYAG  
UniRef100\_UPI00051C0711 . . . . . GT . A . EO I EN . . . TIVNTIVNAGGITCDGA KPS CAAKIFSSLQA AFLGHS LAM . . . KG FRFEAG  
UniRef100\_UPI0005269EBB . . . . . I I CVNM . . . AISNMIGDVAGMICDGA SNS CAMKVSTSSAAWKAVL MALD . . . E TRVTGN  
UniRef100\_UPI00052BD101 . . . . . KE I EN . . . TIKNMALNITGMIC TGNLA SLKANTGVKA AFLSAK MAIK . . . N VIPNKC  
UniRef100\_UPI00052C17FA . . . . . K EO I GY . . . AIKNMIAITGMCCDGA KPG CALKVATGVSSAMLAAM MAIE . . . Q RVVTST  
UniRef100\_UPI00052D7434 . . . . . K EO I GF . . . AIKNMVGNTLGMICDGA KPS CSLKVS SSVSSAMLSL LAME . . . Q KVVTSN  
UniRef100\_UPI00052DC3D2 . . . . . K EO SSY . . . AIKNMIGNTGMICDGA KPS CSLKASTGICSGLIAAM MAMQ . . . N NYVKVV  
UniRef100\_UPI00054D1D18 . . . . . CG . Y . DA I SQ . . . VLNSLATASGIIICDGA KPS CAAKIALAVDAGIMGFE MYRY . . . G QRFNGD  
UniRef100\_UPI00054F526F . . . . . EO I NG . . . TIKNMLANVSGMICDGA KVG CALKLSTSAIAVQSAF LAIS . . . N NIVPDKN  
UniRef100\_UPI000551AC2E . . . . . FDRFED . . . AFKPIYAE GSYGVFC DGA KTG CAAKIALQATEAFNAIN FAIS . . . N KIEPTD  
UniRef100\_UPI0005550901 . . . . . L QNV I Y . . . SIKNMAGN IAGMICDGA KTG CALKVSTGVSAATQSSL LAME . . . G BISEKD  
UniRef100\_UPI0005594DB9 . . . . . GD . E . KD I SH . . . TIVNALAVTSGIVCDGA KPS CAAKISAAVDTGIFGYE MYRN . . . G QQFYGGD  
UniRef100\_UPI00055ABE32 . . . . . Y . SQ V TF . . . AVKNMVGNITGMICDGA KPS CALKISS GSVTA VLSAI MAME . . . H KVVSSM  
UniRef100\_UPI0005654CFA . . . . . LT . L . EO CAM . . . AVETTLGTMSGLICDGA KSS CATKIASGISCAPDSYY TAKK . . . N RRLFG  
UniRef100\_UPI000568CCCO . . . . . QP L . EV I LGN . . . TIVNSISTIGMVC DGA KSS CAAKIAASISMFLAYD LAV . . . NK LNFKDG  
UniRef100\_UPI00058D6E89 . . . . . L ETADA . . . AIVRLMAADVGMLCDGA GTG CANKVSSSVGSA YRAVV SAM . . . G SRMPYD  
UniRef100\_UPI00058EA537 . . . . . V KN I KC . . . AVKNMLADVSGMICDGA KAT CALKIATAVNAAITQCAI LAMS . . . N IEPCSKD  
UniRef100\_UPI00058F7465 . . . . . G NL . DO I KK . . . TIVNTLANISGIIICDGA KVS CAAKIASLLDAAIMAHY LAMN . . . G KTYGAY  
UniRef100\_UPI0005A6581E . . . . . Y . EO I SH . . . CINNMIGDVS GIIICDGA GSA CSMKVSTTS SAAVKSSL LAIN . . . N LRVTSN  
UniRef100\_UPI0005A7BDA1 . . . . . L EO I KH . . . GIQNTIASLSGMICDGA KST CALKISTATNAATQAAT LAMN . . . N ISPTQD  
UniRef100\_UPI0005B25459 . . . . . KO I SG . . . SVQNMLANLTGMICDGA KET CALKLSTTSVGEAILSSY LAID . . . N IMTKPN  
UniRef100\_UPI0005B26E11 . . . . . EE I EG . . . AITNMC EGV TGMVCDE VTEG CSLKVRTSTENATFISAY LSME . . . G VVVGTKN  
UniRef100\_UPI0005C560FF . . . . . GS . V . EO I QN . . . GIINTLGNVSGVICDGA NNS CASKIASGIYA AFDGAM LSQI . . . G NVFTSN  
UniRef100\_UPI0005CD1BEA . . . . . F EO G CY . . . AIONV I SDAGMVC DGA KAS CAMKVSTSSSTAVRAFL MALN . . . Q HAVSTQ  
UniRef100\_UPI0005D177AC . . . . . GN Y . QOVSL . . . TIINTLGNVSGIVCDGA KPS CAAKIASVSDAAILAFH LSI . . . QN KSF LPE  
UniRef100\_UPI0005D21129 . . . . . GD . Y . AR I AR . . . TIINTLANVGGIVCDGA KSS CAAKIAASVNAAMLAHY MSM . . . ND KSFQPG  
UniRef100\_UPI0005D301C2 . . . . . F EO M CF . . . AIONTSLDITGMICDGA KST CAMKVKSTNSAVMSFL MAIE . . . N NEARQ  
UniRef100\_UPI0005D4011A . . . . . I KO I SA . . . AINSMIGD IAGMICDGA KTS CAMKVSSAGSATKSAL MAID . . . G LGVTGN  
UniRef100\_UPI0005DDAE7D . . . . . TO I EG . . . AITNMLANLSGMICDGA KAG CALKLASASAAVQSAI IAKQ . . . D CIVPMM  
UniRef100\_UPI0005DF79E5 . . . . . F EO SCM . . . AIONTVANLTITGMFC DGA KST CAMKVKSTSSAVMSSTL MALD . . . Y NEARQ  
UniRef100\_UPI0005E1A8D7 . . . . . Y . QTI SY . . . AISNMISDISGIIICDGA SNS CAMKVSTATACAFKSVL MAQQ . . . N SVAGER  
UniRef100\_UPI0005EDBE13 . . . . . F EO SCS . . . AIONV I SDSGSMVC DGA KSS CAMKVCTSTTAVRSYL MAMG . . . N HSVKNQ  
UniRef100\_UPI0005EBCA29 . . . . . DO I KA . . . AIONTIGNVSGMICDGA KAG CAMKVCTTSNVAVQSA L LAIN . . . N QIKST  
UniRef100\_UPI0005F18896 . . . . . Y . QTI AM . . . AIGSMIGDISGMICDGA SNS CAMKVSTSVTS AWKAVL MALD . . . E SGVTGN  
UniRef100\_UPI00061465DC . . . . . F SS I AM . . . AISSMIGDVS GMICDGA SNS CAMKVSTSSAAWKAVL MALD . . . N TAVTGN  
UniRef100\_UPI00061540F1 . . . . . L NV VES . . . SVINMVSDISGIIICDGA SSG CAMKVSTATSSA YFRAVL MARQ . . . G VRVSSD  
UniRef100\_UPI00061CEC06 . . . . . F TTVSM . . . SINSMIGDISGIIICDGA SNS CAMKVSSSASAYKAVL MAMQ . . . N QSVAGT  
UniRef100\_UPI00061D174B . . . . . Y . ET V AM . . . AISSMIGDVS GMICDGA SNS CAMKVSTSVSSAYKAVL MALD . . . N SCVTGN  
UniRef100\_UPI000645EB4A . . . . . F EO M TY . . . AITNMMVGNLTGMICDGA KVG CSLKVSSGVSSAVNAAL LAID . . . N ICITQET  
UniRef100\_UPI00064ED1A5 . . . . . Y EN I AM . . . AVNNMIGDVS GIIICDGA SGG CSMKVSTSSISSAWKAIL LAID . . . N TVTSGN  
UniRef100\_UPI00064F42C5 . . . . . GE I KS . . . SIQNILGNITGMICDGA KAG CALKVATCTTAATQSTI VTLE . . . G NSIKST  
UniRef100\_UPI000658074E . . . . . Y . QSIAM . . . AIONMIGDVS GMICDGA SNS CAMKVSTSSSAWKSVL LAID . . . D SAVTGD  
UniRef100\_UPI000657FCDF . . . . . Y EPVAL . . . AIGSMIGDISGIIICDGA ANS CAMKVSTSVSAAYKAVL MALD . . . S GVTGN  
UniRef100\_UPI00065DC13D . . . . . G . GY . EE I AH . . . TVVNALAI VSGIVCDGA KAS CAAKIASVEAGILGYN MYKC . . . G QQFYAG  
UniRef100\_UPI000664A9FE . . . . . TH I KG . . . AITENMIANLSGMICDGA KAG CALKLSSASAAVQSAI IAKQ . . . G FHVPPKN  
UniRef100\_UPI0006666BAE . . . . . L NV I QS . . . AVINMVSDVS GIIICDGA SNS CAMKVSTVTMSAFKAVM MARL . . . G TRVSDH  
UniRef100\_UPI0006675CDC . . . . . Y NT I AM . . . AISSMIGDVS GMICDGA SNS CAMKVSTSSAAWKAVL MALD . . . D TAVTGN  
UniRef100\_UPI00067E8717 . . . . . KE I DG . . . AITNMLANLTGMLCDGA KGS CAIKLSTSSAEAVVSAY LAIN . . . N VIVPSNT  
UniRef100\_UPI00067E87A0 . . . . . NO I GY . . . AIVNMALNITGMICSGGNLA CSLKANTGVKASFLSK MALE . . . N IIVPNRC  
UniRef100\_UPI00067F25CD . . . . . EQ MYY . . . AIONTLGNVTGMLCDGA KAG CAMKVATCSGA AVQAAL LAKR . . . G ICISGT  
UniRef100\_UPI000682F91F . . . . . Y NO I TF . . . AVKNMVGNITGMICDGA KPS CALKISS GSVTA VLSAI MAME . . . D KVVSSM  
UniRef100\_UPI00068BDE31 . . . . . ET . V . ET I LE . . . TIVNSTATCGMICDGA KSS CAAKIATLYSAFLGYE LAKN . . . K TSFRAG  
UniRef100\_UPI00068C5F2D . . . . . Y . RCIAM . . . AISSMIGDVS GMICDGA SNS CAMKVSTSVSSAWKAVL MALD . . . E TAVTGN  
UniRef100\_UPI00068F3505 . . . . . AS F . DT I AK . . . TITNVLGNVSGIVCDGA KSS CAAKIASVDAAILMGHY LAM . . . DD NTYGAG  
UniRef100\_UPI0006B45A2F . . . . . KO I NG . . . AIONMMLGNISGMICDGA KVG CALKLSTAASTAIQSA L LAIN . . . E HVIPQN  
UniRef100\_UPI0006B4E53B . . . . . DN . Y . EV I SK . . . LITNMISTVGMVC DGA KSS CASKIATALECAFLSWD MAKI . . . D RTFPGE  
UniRef100\_UPI0006B6582F . . . . . EO I TG . . . AQONMLSNLTGMICDGA KET CAFKLS TAGEAVLAAY LANE . . . G IIVRPNV  
UniRef100\_UPI0006BA2F67 . . . . . Y SAVER . . . AVASMTGDVGMVC DGA GCS CALKVSSANAGRAAL LSLA . . . G RRVPGTN  
UniRef100\_UPI0006BA3881 . . . . . Y ET I AM . . . AVS SMDGVSGVICDGA SDB CAMKVSTAVSSAWKAVL LAID . . . N TVTSAS  
UniRef100\_UPI0006BB9381 . . . . . KO I AG . . . ACSNLYGNLTGMICDGA KES CSMKLS TCAEESVVAAY LAIN . . . G MITDDNV

UniRef100\_UPI0006C39D8F .....EMMAH...TLNMMASITGMICDGGNQGCTMKGVAAVDAAYKSVEFAMN...G.IYISEVH  
UniRef100\_UPI0006C7D148 .....EISG...AVQNMGGVAGMFCDDGAKGGCALKLISICAGEAVYAALYAMD...N.SIVQATD  
UniRef100\_UPI0006C80B77 .....T.PY...QTI...CK...AIS...SMNGGIVGMVCDGGAADS...CAMKVASAAEIIAYRSVLMAIA...G.IRVEGTD  
UniRef100\_UPI0006CF8A7E .....V.RH...IAG...AIT...NLMDLAGIICDGAAGCALKLATAGAGIAVQNALFSIQ...G.VNVHFTD  
UniRef100\_UPI0006D2C4D0 .....L.KT...ISM...AIN...SMVGDITGIIICDGAANS...CAMKVSTGAACAIKAVLMALD...N.TAVTGRD  
UniRef100\_UPI0006D7A562 .....LD.E...EKIES...ELTNALATSGGIVCDGAKASCASKIAVLDNGLLALEMAK...RG.IEFEBYMD  
UniRef100\_UPI0006E4604E .....L.KN...IEY...AIK...NMIA...VS...GMICDGAKTTCALKIATAVNAAIQCSLLALK...G.MRPSNTD  
UniRef100\_UPI00071F4811 .....Y.ET...LAK...AIG...SMIGDVS...GIIICDGAANS...CAMKVSTSSASSAWKAVLMALD...D.TAVTGD  
UniRef100\_UPI0007377E98 .....Y.KT...IAG...AIN...NMIGDLSGLLCDGAANS...CAMKVSTSVSSAWKAVLMAME...E.TAVTGN  
UniRef100\_UPI00073D997D .....L.KA...VNS...AIT...NMVSDVS...GIIICDGAANS...CAMKVSTSVSSAFKAVLMALQ...Q.SQASAND  
UniRef100\_UPI00073ED31D .....Y.EQ...VWN...AIK...TMCNLTGMCCDGAQGGCALKVYSGVSAVQAALLAMR...G.I.QTHDD  
UniRef100\_UPI00073F8157 .....E.EG...VGL...AVR...NMVGTVTGMVCDGGKVGVCALKVSMASTAAVTSALLAAR...G.VGLLPSD  
UniRef100\_UPI0007453BC8 .....Y.AI...ISG...AIK...NMIGDVS...GIIICDGAASATCAMKVSTSTTESAVKSVLMMAQ...H.WVANQHD  
UniRef100\_UPI000754CA4E .....F.GT...IGR...AIS...NMVSDVS...GIIICDGAANS...CAMKVSTAVTSAFKAVLLARN...G.IRASTSD  
UniRef100\_UPI0007612A08 .....Y.TA...IEN...IVKYVMGNLSGMICDGAKPS...CALKLISSTIHAAMHAADFALD...N.AVVPFAD  
UniRef100\_UPI00076754E8 .....DQ...IGG...AIK...NAVADLSGMICDGAKSGCALKLSTASAAVQNALLAKN...D.CYADTTIN  
UniRef100\_UPI00077B6F9A .....Y.ET...IAM...AIS...SMIGDVS...GMICDGAANS...CAMKVSTSVGSAWKAVMMALD...N.SAVTGN  
UniRef100\_UPI00077B762A .....I.DT...INT...AIINMVSDVTGMICDGAANS...CAMKVSSVVSSAFKSVLMAMQ...N.RCASAN  
UniRef100\_UPI0007CC6FEC .....I.ET...INT...AIINMISDVTGMICDGAANS...CAMKVSSVVSSAFKSVLMAMQ...N.RCASAN  
UniRef100\_UPI0007E2FD4B .....Y.QS...ISM...AIS...NMIGDVS...GMICDGAANS...CAMKVSTSSASSAWKAVLMALD...N.TSVTGN  
UniRef100\_UPI0007E4912E .....F.KO...VSD...AIC...SMIGDITGIIICDGAKTS...CAMKVSSASAAVKAALMALD...G.IRVTGN  
UniRef100\_UPI0007ECF164 .....Y.DG...AAA...AVK...NMIA...NLTMGICDGAKPS...CAMKLTS...GVSTAVLSAMMAMQ...E.RCVSSV  
UniRef100\_UPI0008032F95 .....F.ET...ASM...GVC...SMIGDITSGIICDGAANS...CAMKVSTSVASGYKSVLMAMQ...E.TCSTGN  
UniRef100\_UPI00080D994A .....Y.EP...VDM...AIC...SMIGDLSGIICDGAANS...CAMKVSTSVSSSFAVLMALN...C.IRVTK  
UniRef100\_UPI00080DB02B .....Y.EP...VNM...AIC...NMIGDLSGIICDGAANS...CAMKVSTSVSSGFAVLMALN...R.IRVTGN  
UniRef100\_UPI00080DB567 .....Y.EP...IDM...TIC...NMIGDLSGIICDGAANS...CAMKVSTSVSSGFAVLMALS...Q.VRVTGK  
UniRef100\_UPI0008240A25 .....L.EQ...VEC...AIF...NMVGDITAGIFCDGAKACSMKVSTSGAAVAKSALLAIN...N.IRVSGQ  
UniRef100\_UPI000826D560 .....QO...IKA...AVQNTIGNVSGMICDGAAGC...CAMKVSTCSNVVQSALLAIN...H.QBIKST  
UniRef100\_UPI0008298F8F .....RE...LIM...VIO...NMASGLTGMICDGGNQG...CAMKGIIVADAAFRAVEMATQ...G.TCIENMH  
UniRef100\_UPI00082B4A3B .....G.SF...DD...IAH...TVV...NALAITS...GIVCDGAKSCAAKIAAAVDAGILGYNMYIR...G.QEFPQD  
UniRef100\_UPI00082B5CEF .....QO...IKA...AVQNTIGNVSGMICDGAAGC...CAMKVSTCSNVAVQSALLAIN...H.QBIQST  
UniRef100\_UPI00082CB2ED P...RKMDL...Y.QV...ISD...TITNTICTSGMICDGAKSSCAAKIATALESALTALMSLK...G.NAFQPGD  
UniRef100\_UPI00082DCA09 .....G.TY...ED...ITH...TVV...NALAIVSGIVCDGAKASCAAKIAAAVDAGILGFNMYKR...G.QQFYAGD  
UniRef100\_UPI00082E56C3 .....GD...Y.KE...IVH...TVV...NALAIVSGIVCDGAKASCAAKIASAVDAGILGYMYIR...G.QQFYGGD  
UniRef100\_UPI00082E5D45 .....F.EN...IVF...ALKNMIGNITGMICDGAKTGCALKVSTGVSAATQSALLAIN...G.TEISEKD  
UniRef100\_UPI00082EC760 .....QO...VEI...AIONTIPNVFGVVCDDGAKLACALRISSGGTGIALEAANLAIN...G.VRLANNQ  
UniRef100\_UPI00082E9F22 .....E.MA...ET...AIONTIPNVFGVVCDDGAKLACAMRISSGGTGIALEAADLALK...G.VRLANNQ  
UniRef100\_UPI0008328999 .....DR...T.EV...ISH...ALV...NALAIVSGIICDGAKASCAGKIAVSDVAGILGYLMYKE...G.QQFYAED  
UniRef100\_UPI0008338905 .....GG...Y.RE...ISH...TLV...NALAIVSGIVCDGAKASCAAKIASAVDAGILGYHMYRE...G.QQFRAGD  
UniRef100\_UPI000833FEB4 .....AA...P.EV...IAE...TVV...NLAIVAGVLCDDGAKPSCASKIALALRASAYAAHYAKE...G.RSFHTGD  
UniRef100\_UPI000834FB49 .....GT...R.EQ...IGG...TIVNTLGNVGGIVCDGAKPSCAAKIASAAVDAILGCDMAM...AD.RGFQAGE  
UniRef100\_UPI00083587B3 .....Q...EH...LES...ALFNMTGDSVGIICDGAAGSGCSLKVSTSAQSAVKAALFAVE...G.TRLTSH  
UniRef100\_UPI00083945F5 .....DD...K.EV...IKE...TLANALAVNGGILCDGAKASCAMKIASLLRNGFLAYDAQVA...G.RSFNPNQ  
UniRef100\_UPI00083962C7 .....F.AQ...IQG...TIS...SMIGDIAGIICDGAKTS...CAMKVSSSAGAVKASLMALD...G.VFVTGN  
UniRef100\_UPI0008487F51 .....AD...Y.DV...IGR...TII...NALGNVGGIICDGAKASCAGKIAVSAVEAGLLAYEMAK...NG.RLTFAGF  
UniRef100\_UPI00084B5F72 .....F.EQ...GCI...AIONVLSDCSGMVCDGAKSTCAMKVSTSTSAVNGFLMALR...C.NEAHNQ  
UniRef100\_UPI00084B63DAB .....G.GY...EV...VIH...TVV...NALAIVSGMVCDGAKASCAGKIAVSDVAGILGYNMYIR...G.QQFYAGD  
UniRef100\_UPI0008637372 .....K...AIE...R...VIRNMASGLTGMICDGGNHG...CAMKGIIVADAAFRAVDLAQ...G.VSIEEIH  
UniRef100\_UPI00088B7A46 .....GS...Y.SD...IAH...TIV...NLAIVSGMICDGAKASCAGKIAVSAVEAGLLGMQMKNH...D.SQFYNGD  
UniRef100\_UPI0008A543AE .....EQ...IEG...ACS...NMFANLTGLICDGAKNTCALKLSTCAGEAVLSAFLALN...G.CTPKENV  
UniRef100\_UPI0008D96B94 .....EG...Y.DA...ISH...TLV...NALAIVSGIICDGAKASCAGKIAVSAVEAGLLGYSMYKS...G.NEFSKGD  
UniRef100\_UPI0008DA2597 .....F.RQ...VAF...SVQ...NMIA...NLTMGICDGAKPS...CALKVASGVSTAVLSAMMAME...N.KCVTSV  
UniRef100\_UPI0008DB02E6 .....ED...K.EL...I...KE...TLINSLATNSGIICDGAKECAMKIASLKMFAFLSYRQAKS...G.NSFKAGD  
UniRef100\_UPI0008EB9056 .....E.PL...AV...IER...ALATMSGSVIVMVCDGAANS...CSMKVSASVHAAYEAVLLAIN...D.VRVQGT  
UniRef100\_UPI0008FF7EAD3 .....GD...Y.EV...ISH...CLINSLATISGMVCDGAKPSCASKIATAVESGAILGCQMARK...G.QFLRPGD  
UniRef100\_UPI0008FF7ED9 .....GS...Y.ED...ISR...TII...NTLGDVAGIVCDGAKPSCASKIASAVDAAILGHTLAMD...G.KAFAPGE  
UniRef100\_UPI0008F80DE9 .....K...AMER...VIC...NMASITGMICDGGNQGCTMKGIAAAVAAAYASVRLAMK...G.VSVQNVH  
UniRef100\_UPI0008F82D52 .....QO...AEN...AIONLIPNVFGVVCDDGAKLACALRMASGTAMAILDAELALK...G.VRLANNQ  
UniRef100\_UPI0008F8782C .....EW...MTR...TIV...NMASITGMICDGGNQGCTMKGIIIAVDAAFRSVELAKN...G.AYIHSVH  
UniRef100\_UPI0008F937B4 .....GN...Y.EL...IAH...TLV...NALAIVSGIVCDGAKPSCASKIAVADAGIIGYMAIK...G.QEFKDGE  
UniRef100\_UPI0008F9589F .....GD...Y.DA...VCR...TII...NTLANTSGIVCDGAKASCAGKIAVSAVDAILFAGDLALK...AG.KAFGDGE  
UniRef100\_UPI0008FC57CC .....AD...Y.DT...VAN...SITNSLGNISGVICDGAKASCATKIIATGIYAAFSSMLAIN...D.KYLQGGD  
UniRef100\_UPI0008FDD765 .....Y.DT...VAM...AIS...SMIGDISGIICDGAANS...CAMKVSTSSATAAYKAVLMALD...H.SGVTGN  
UniRef100\_UPI0008FE8B88 .....AT...P.AV...IAE...TVV...NALAAAAGVLCDDGAKPSCAAKIALALRASAYTAYEAKE...G.RSFKTGD  
UniRef100\_UPI00091D9C84 .....Y.EQ...GCI...AIONVLSDCSGMVCDGAKSTCAMKVSTSTSSAATAFMLAMN...D.TQAFDD  
UniRef100\_UPI00092FE5DD .....Y.RQ...VTY...AVK...NMIA...NLTMGICDGAKPS...CALKLTS...GVSTAVLSAIMAME...Q.KYVTAVE  
UniRef100\_UPI00093024B0 .....GR...Y.SE...VAH...TVV...NALAIVSGMVCDGAKASCAGKIAVSAVEAGLLGMQMQQR...G.SQFYGGD  
UniRef100\_UPI000930B414 .....GD...Y.EA...VIH...TVV...NALAIVSGIICDGAKASCAGKIAVSAVEAGILGYNMYMQ...G.QQFYGGD  
UniRef100\_UPI00093231F9 .....AD...Y.ET...VAN...SITNSLGNVSGVICDGAKASCATKIIATGIYAAFSSMLAIN...N.KYLHEGE  
UniRef100\_UPI000934464B .....Y.EQ...ITY...AVQ...NMIA...NLTMGICDGAKPS...CALKVSTGVSTAVLSAIIAME...N.RCVTSV  
UniRef100\_UPI00093B8263 .....GS...Y.EM...VCD...AITNLGNLSGVICDGAKASCAMKISSGIYSAFPDATMLAIH...K.DVLKSGD  
UniRef100\_UPI00093C1390 .....GD...L.KV...VAH...TLV...NALAITS...GIVCDGAKASCAGKIAVADVTGILGYMYKK...G.QQFYGGD  
UniRef100\_UPI000943C72E .....L.EQ...IKS...VVS...NMAIGHGMVCDGAANS...CTMKVATSCDAACRAVLMALH...N.ICVTGN  
UniRef100\_UPI00094B0001 .....L.RE...IKY...AIN...NMLATLQGMICDGAKATCALKIIAAGTNCACIQCSTLALA...D.ISPTSKD  
UniRef100\_UPI00094E2923 .....E...G...MTR...ALN...NMASITGMICDGGNQGCTMKGMATAVEMAFASAAALAMD...H.AYIFDAH  
UniRef100\_UPI00094E735C .....P.AE...IEA...TIS...NMTGEHIGMVCDGAGDGC...SLKIIATAVDAAYRAVFLSRK...G.IRVNGTE  
UniRef100\_UPI00094EF040 .....MS...Y.DE...ICD...VITNSIATIGMVCDGAKSSCAAKIAASVEAAILVAVHMAKK...H.RAFKDG  
UniRef100\_UPI0009501AF9 .....GE...Y.KV...ISH...TIV...NALAIVSGIVCDGAKPSCAGKIASGVEAGILGYHMYKD...G.QQFLAGD  
UniRef100\_UPI00096A533E .....GD...L.YA...VSH...TLV...NALAIVSGIVCDGAKPSCAAKIANAEIAGLLGYEMFRN...G.QQFKDGE  
UniRef100\_UPI0009711B93 .....Y.EQ...SCF...SIQ...NVLSDCSGMVCDGAKSTCAMKVSTSTSSAVNAFILAIO...S.SAAKEQ  
UniRef100\_UPI0009774A03 .....D...DM...TH...TLD...NMASITGMICDGGNQGCTMKGIAAAVDAAYKSVEFAMN...G.YIADVH  
UniRef100\_UPI00097D24C5 .....L.KD...MER...TVR...NMVGNVS...GMICDGAKSCALKVATAVGAGIQAVLLAMA...G.TQVPGNE  
UniRef100\_UPI00097DD6AB .....DD...K.EV...IKE...TLANALAVNGGILCDGAKASCAMKIASLLRNGFLAYDAQVA...G.RSFNAND  
UniRef100\_UPI000981B105 .....Y.TN...VCY...AVK...NMIA...NLTMGICDGAKPS...CALKLTS...GVSTAVLSAMLAME...N.RHVTAE  
UniRef100\_UPI00098489F7 .....EQ...IQG...A...C...NM...LSNLTGMICDGAKETCSLKLSTSGAVEAIIAYLAIE...N.NIVLRSNT  
UniRef100\_UPI000984CB9F .....GS...F.AQ...YEA...TIVNTLANVGGIVCDGAKPSCAAKICAAVDAAILGCDMAL...AD.DNFLAGD  
UniRef100\_UPI000987896C .....L...E...DM...EK...VIN...NMASITGMICDGGNHGCTMKGVAAAVETVWRSVELGMN...G.ASVWQHD  
UniRef100\_UPI0009885148 .....GG...Y.TE...VIH...TVV...NALAIVSGIVCDGAKASCAGKIASIDAGIFGYSMYRQ...G.QQFFDGD  
UniRef100\_UPI00098BE457 .....GG...Y.KE...ISH...TIV...NALAIVSGIVCDGAKASCAGKIAAGVADAGILGYHMYKN...G.QQFRGGD  
UniRef100\_UPI00098CFA1B .....L.DV...IND...AIC...SMIGDVS...GIIICDGAANS...CAMKVSSSTANSFAKAVIMALD...N.VRVTGQ  
UniRef100\_UPI00098D3B67 .....L.DV...IND...AIC...SMIGDVS...GIIICDGAANS...CAMKVSSSTANSFAKAVIMALD...N.VRVTGQ  
UniRef100\_UPI00099058AA .....F.DT...VSM...AIC...SMIGDVS...GIIICDGAANGCAMKVSTSVTSGYKAVLLMALD...N.IRVTGD  
UniRef100\_UPI000994A50E .....H...Q...IKA...AIONTIGNVSGMVCDGAKAGCAMKVSTCSNVAVQSALLAVS...N.HEISST  
UniRef100\_UPI0009B08107 .....G...GY...KE...ACH...AVV...NALAIVAGMVCDGAKPSCAGKIAFVNAGILGYVMYRD...G.QQFYGGD  
UniRef100\_UPI0009B9C8CB .....E...H...M...VQ...TINN...MALSIITGMICDGGNQGCTMKGVVAVDAAFKSVFAMN...D.TYIYSHV  
UniRef100\_UPI0009BA4056 .....GG...E.EE...IEK...VIVNTLGNVSGIVCDGAKPSCAAKIASVDAAILVASMAMK...D.RYFRPGE  
UniRef100\_UPI0009BB382E .....Y.KQ...VAF...AVK...NMIA...NLTMGICDGAKPS...CALKVTTGVSTAVLSAVMAME...N.RCVTSV  
UniRef100\_UPI0009BBCF51 .....GD...Y.EQ...DI...AR...TII...NTLANVSGIVCDGAKSCAGKIAASVDAAILGHEMMSM...DG.NTFGAGE  
UniRef100\_UPI0009BBFC5B .....E...Q...IGG...AIK...NMVGTLAGMVCDGAGGCAFKLSTASSEAI IQAKLAMS...N.VFINDLD  
UniRef100\_UPI0009COCF43 .....E...S...KAEK...AIK...NMIGDVAVMICDGAAGC...CAVKVSVSSMFRRAVRLAQ...G.VVIPASN  
UniRef100\_UPI0009D940DD .....CG...DD...Y...IAQ...TVV...NGATQISGMVCDGAKASCAGKINLALISAFILGYQKALS...N.NSYQSGH  
UniRef100\_UPI0009DD1839 .....G...GE...Y...IEH...TIV...NCLAISSGVVCDGAKSCAGKIAIGLDAAILGYQMIKN...Q.QQFRGGD  
UniRef100\_UPI0009DE0C1B .....GG...V...KD...ISH...TIV...NALAIVSGIVCDGAKSSCAAKIATAVESGIFGFEMYQN...G.QEFDYDQ



UniRef100\_UPI0009DF0474 . . . . . KQVEG . . . AMENIVANLSGMICDGA KSGCALKLASAASA AVQSAI IAGQ . . . D.CIVPPLT  
UniRef100\_UPI0009E1BAB6 . . . . . GA.DV. . . KVISD . . . TVTNALSIASGMVCDGAKPSCAAKIATSLDAATLGLHLMALE . . . G.NVFEVGT  
UniRef100\_UPI0009E334B1 . . . . . EEIEG . . . ACTNVFANLTGVICDGA KESCSMKLSTAESVIAAYLAIN . . . G.VVTDANV  
UniRef100\_UPI0009E6AA31 . . . . . LKNIKY . . . SIKNMIGDLSGMVCDGAKCGCALKVSTGVSSAQSAMLAIN . . . D.BISYHD  
UniRef100\_UPI0009E76B25 . . . . . VQIAG . . . AIKNNMVSISGLACDGA KGGCAFKLSTAAEAETLHAHLAVN . . . N.TIVSNLD  
UniRef100\_UPI0009F78859 . . . . . F.KTIVSM . . . AITSMMIGDLSGIICDGAANGCAMKVSTSVTSYGKAVLMALD . . . N.IQVTDGE  
UniRef100\_UPI0009F905D5 . . . . . GS.R.EQIGA . . . TVVNTLGNVGGIVCDGA KASCAAKISAAVDAAILGHD.MAM . . . AG.RGFRAGE  
UniRef100\_UPI000A02F418 . . . . . VRMDE . . . AIQAVLGA FSGVVCDGAKESCA YKASATAAGSAIEYAF.FAVG . . . DGVAIPQGM  
UniRef100\_UPI000A039A04 . . . . . EOVGG . . . AVQNIIGNLAGMICDGA KGGCAFKLSTAASEA ILASE.MALA . . . G.IIINPVD  
UniRef100\_UPI000A054DEE . . . . . F.PCIAR . . . TLCLNLA SSSLSGIICDGA KPSCSLKVMMVGV EIGLKTAL.LTLQ . . . G.LAVSPS.  
UniRef100\_UPI000A0591C9 . . . . . F.ETISM . . . AITSMMIGDLSGIICDGAANGCAMKVSTSVTSYGKAVLMALD . . . N.IQVTDGE  
UniRef100\_UPI000A056B98 . . . . . LDLFDT . . . IYKIYIEGVGGVFCDGA KRGCAMKALS.SAKMALS ESK.LGEE . . . G.VKIGFDE  
UniRef100\_UPI000A1C9B8B . . . . . R.EOVSY . . . AVKNNMIGNLTGMICDGA KPSCAMKVSSGVSTAMLSAL.MAME . . . N.KVVTDIE  
UniRef100\_UPI000A7D81D4 . . . . . Y.ESI ER . . . AVSSMA GD TVGMVCDGAGCS CALKVAA SVNAAGRAVV.LSLA . . . G.RRVPGTN  
UniRef100\_UPI000A919F2C . . . . . GD.Y.EVVAH . . . TIVNALAIISGTICDGA KPSCAAKIAASVEAGIVGYH.MYMH . . . E.QQFRGGD  
UniRef100\_UPI000B02A458 . . . . . EQIEN . . . AIHTNLGNVAGIICDGA KSSCALKISTCTNAA MQASL.LAIN . . . H.LRIKSN  
UniRef100\_UPI000B34E5B4 . . . . . GG.Y.ERVSH . . . TITNTLANVSGIVCDGA KPSCAAKIASAVDAAYMAHY.MAMK . . . D.EYFNAGE  
UniRef100\_UPI000B34FC2F . . . . . L.EQMAA . . . CTSNMIGDVSIGICDGA GSA CSMKVSTASAAYKAAL.MAVN . . . N.YGVGENE  
UniRef100\_UPI000B369692 . . . . . Y.AQVMY . . . AVQNMIA TLTGMICDGA KPS CALKVTSGVSTAVMSAI.MAMD . . . Q.KCVTAVE  
UniRef100\_UPI000B37B82C . . . . . QS.L.DTICH . . . TIVNALAIISGILLCDGA KPSCAAKIAASVDAGIMGM.MYKE . . . NG.SQFYRGE  
UniRef100\_UPI000B398C94 . . . . . G.SF.DVVKH . . . TVVNALAVVSGILCDGA KPSCAAKIAAADGAILGLD.LYRS . . . G.QQFYNGD  
UniRef100\_UPI000B41319A . . . . . Y.EQITF . . . AVKNNMIA TLTGMICDGA KPGCSMKVASGVSTALLSAM.LAME . . . Q.KCVTSVE  
UniRef100\_UPI000B497A29 . . . . . NEIQOR . . . AITNMQGNVAGMFCDGA KAGCALKLSTCTSTAVQSAI.MAME . . . G.LAICVST  
UniRef100\_UPI000B803E6A . . . . . AS.F.PVIAR . . . STANTLANISGVICDGA KASCAAKIASVDAAILSFR.LAE . . . KD.QYFEAGD  
UniRef100\_UPI000B889D7C . . . . . I.EOMKY . . . GINSMVADISGVVCDGA KSGCALKIATAVNSAVRAAT.MAIN . . . G.IGANAYD  
UniRef100\_UPI000B96A611 . . . . . Y.ADI CH . . . SVKNMIA TLTGMICDGA KPSCSLKICS.GVSTALLSAL.LARE . . . G.KHVTEAE  
UniRef100\_UPI000B9AD5C9 . . . . . Y.KQSCY . . . AIQNVLDGCTG IICDGA KSTCALKVKRTTSSAIYSSM.LAIN . . . A.TGTTDQ.  
UniRef100\_UPI000BE30C64 . . . . . T.KQIEG . . . AITSNMIA GLTGMICDGA KIGCAYKLAISVSSAIDASE.LAIN . . . G.VVTPSNN  
UniRef100\_UPI000BE32075 . . . . . AD.Y.DTIGK . . . TLINSLGNVGGIVCDGA KDSCAAKISAVDAGITGYE.MAT . . . RN.HSFPFGE  
UniRef100\_UPI000BEC9F6 . . . . . EKIKY . . . AITQNLGNVGTGMICDGA KAGCAMKVATCSSAAVQSAL.LASQ . . . G.MCISATD  
UniRef100\_UPI000BF17E78 . . . . . Y.DTIAM . . . AITSMMIGDVSGMICDGA S.NSCAMKVSTASAAYKAAL.MALD . . . D.TAVTGN  
UniRef100\_UPI000BF7A1D0 . . . . . TTIKS . . . VIQNMIGNVAGMICDGA KAGCALKVSSCTSTAVHTAL.MAIR . . . G.VEIKSTD  
UniRef100\_UPI000C070483 . . . . . KQIAG . . . ACTNVFANLTGMICDGA KESCSMKLSTAESVIAAYLAIN . . . G.IITDKNV  
UniRef100\_UPI000C079C6A . . . . . EQIDG . . . AITENMIA NLSGMICDGA KAGCALKLASAASA AVQSAV.IAKY . . . N.CIVPALN  
UniRef100\_UPI000C085CD7 . . . . . ED.R.QVKEE . . . TLANALAVNGGILCDGA KASCAMKIASLNRNAFLAYD.QAKA . . . G.OSFKAQD  
UniRef100\_UPI000C0899A6 . . . . . GG.Y.EEIAH . . . TIVNSVAI LSGTICDGA KSSCAAKISMAVEAGILGFE.MYRS . . . G.QQFYDGE  
UniRef100\_UPI000C126F74 . . . . . Y.QAVSM . . . AITSMMIGDLAGMICDGA S.NSCAMKVSTASAGSYKAAL.MALD . . . G.TRVTGN  
UniRef100\_UPI000C1C4F8C . . . . . LN.T.EQIGK . . . VLVNTLATSGGIVCDGA KPSCAAKIAIALDN AFLAID.MAK . . . NN.IVFESGD  
UniRef100\_UPI000C704F69 . . . . . LS.L.AQIKH . . . AITETLGLTSGVICDGA KSSCATKIASGISAAPDGY.Y.AASK . . . N.RKLEFGE  
UniRef100\_UPI000C756D7A . . . . . EAFNTN . . . VIQNMASGLTGMICDGA KNHGCAMKGIVAVDAAFRAAD.MAKK . . . G.ICIEHIH  
UniRef100\_UPI000C7898D9 . . . . . Y.KEVCF . . . AVKNNMIA TLTGMICDGA KPSCALKVTS.GTSTILLSAM.MAME . . . Q.RVYTSVE  
UniRef100\_UPI000C790D6F . . . . . GG.Y.DAVAH . . . TIVNALAIISGVICDGA KASCAGKIAVAVESGILGYQ.MYRQ . . . G.HQFWGSD  
UniRef100\_UPI000C7A5CFB . . . . . GS.R.EEIDD . . . TITNTVGTIGGMVCDGA KASCAAKIAAAVDTLSLMQM.MSQR . . . G.NVFPQGE  
UniRef100\_UPI000C7B0E47 . . . . . AN.L.PAIKQ . . . TLINALAIISGTICDGA KSSCAAKIATAVDAGILGYE.MQCN . . . N.QRFCCGD  
UniRef100\_UPI000C7B4464 . . . . . ES.F.AITCD . . . TIVNSIATIGGMVCDGA KPSCAAKISVAVENAILNALE.MAKR . . . K.RAFQPG  
UniRef100\_UPI000C7BBC84 . . . . . GD.Y.KAVSM . . . LITNTIANVGGIICDGA KPSCAAKIAASLEAAFLAYE.MSR . . . EG.KTFLPGE  
UniRef100\_UPI000C7E66C1 . . . . . GG.I.EEISQ . . . TITNTLANVSGIVCDGA KPSCAAKIASVDAAILMAFS.MAMO . . . N.RGFCPGE  
UniRef100\_UPI000C838674 . . . . . GS.L.EQIGA . . . TITNTLANVGGIVCDGA KSSCAAKISAAVDAAILGHD.MAM . . . AG.RSFHAGE  
UniRef100\_UPI000C8393D6 . . . . . AG.Y.DTIGK . . . TIVNSLGA VGGIICDGA KASCAAKIASAVEAGILLAYE.MAK . . . NG.RTFAFGE  
UniRef100\_UPI000C852B7D . . . . . GT.M.KQIEH . . . TIINTLGSISGMVCDGA KPSCAAKIASALYSGMIAQN.LAMC . . . G.HVFEPDT  
UniRef100\_UPI000C8536EC . . . . . E.QQMLG . . . AMQNLGSI SGMICDGA KEGCANKVELSSGLAVQAAFLAMO . . . G.MSIGKSD  
UniRef100\_UPI000C8567A5 . . . . . E.KQVQY . . . TIKNNMIA TLTGMVCDGA KSGCAVKVATAVSAAVQCAV.LAMN . . . N.VHAPSID  
UniRef100\_UPI000C860ECO . . . . . Q.SALCR . . . AITKNNMIA TLISGLICDGA KSGCALKIATSVASAMQCAQ.LALA . . . G.AGAGCLD  
UniRef100\_UPI000C8648F . . . . . GT.R.AQIGA . . . TVVNTLGNVGGIVCDGA KASCAAKISAAVDAAGILASD.MAL . . . AG.RGFRAGE  
UniRef100\_UPI000CDB216C . . . . . L.KEIEH . . . TVNTSLAGISGMICDGA KSSCALKIALSVQNSILSSA.LSLK . . . G.IGIRPGE  
UniRef100\_UPI000CEE9E5C . . . . . AD.Y.KIICD . . . TITNALCTIGGMVCDGA KSSCASKISEALDCGILAYN.LAR . . . DG.KVFKSGD  
UniRef100\_UPI000CF192D3 . . . . . F.EVVS.M . . . GICNMIGDLSGILCDGA KSGCTMKVSS.TVQSAPKSL.LALE . . . K.KRVSGMD  
UniRef100\_UPI000CF9CB2C . . . . . RD.Y.QHVAD . . . TITNTLGNVGGIVCDGA KPSCAAKISAAVHAALMGHY.MSM . . . HG.QVFKEGE  
UniRef100\_UPI000CFACD79 . . . . . K.KEIQG . . . GINNVA GLTGMVCDGA KVGCAFKMAMGAIMSYYSAL.LAVD . . . E.VFLDVDN  
UniRef100\_UPI000D08F8B8 . . . . . G.GY.EEVIH . . . TVVNALAIISGVICDGA KASCAAKIASAVDAGILGYH.MYLN . . . G.QQFYAGD  
UniRef100\_UPI000D0EAF6E . . . . . Y.YRICH . . . SVKNMIA TLTGMICDGA KPSCALKIISGVSTALLSAL.LSIE . . . G.KCVSSVE  
UniRef100\_UPI000D0ED673 . . . . . EELTK . . . VIQNMASGLTGMICDGA KNHGCVMKGITAVDAAFRAVD.LAME . . . G.ICIENIH  
UniRef100\_UPI000D1E74A . . . . . E.EKAEM . . . AITKNNMIGD AVGMICDGA GFSCALKVVSSVSSMYRAVQ.LAQS . . . G.VVIPATN  
UniRef100\_UPI000D16B181 . . . . . V.EQISA . . . AITCSMIGDITG IICDGA KSGCAMKVSSAAGSAVKSAL.MALD . . . G.IRVTGN  
UniRef100\_UPI000D1756B8 . . . . . F.EQSCV . . . AITKNVLDSTTGMVCDGA KATCAMKVSSSSQAAYKSML.LAMN . . . N.HAVNKQ  
UniRef100\_UPI000D1E7FE7 . . . . . S.Y.ELVSW . . . TITNTIATIGGMVCDGA KSSCATKIASAVECALGLD.LMAKK . . . G.HVFQPG  
UniRef100\_UPI000D383FBF . . . . . Y.AVISM . . . AITASMMIGDVSGMICDGA S.NSCAMKVSTSVSSAYKAAL.LALD . . . G.SAVSGND  
UniRef100\_UPI000D3A1105 . . . . . AD.Y.NIICN . . . TITNALCTIGGMVCDGA KSSCASKIAEAVDCGILAFN.LAR . . . DG.KVFKAGD  
UniRef100\_UPI000D3E07D8 . . . . . QVKAAXXXIQNTIGNVSGMICDGA KAGCANKVSTCSNVAVQSAM.LAIN . . . D.QEIKSTD  
UniRef100\_UPI000D3ED3B7 . . . . . F.KQISD . . . SITCSMIGDITAGIICDGA KTS CANKVSSASAAYKAAL.MALD . . . G.IRVTGO  
UniRef100\_UPI000D54E33D . . . . . Y.SQITF . . . AVKNNMIA TLTGMICDGA KPSCALKISTGVSTAVLSAI.MAME . . . Q.KVSSGE  
UniRef100\_UPI000D6459D2 . . . . . E.QIIN . . . AMQIILGNLCCIICDGA KESCALKISTAAVEAVRAGF.MASQ . . . GA.ILESGT  
UniRef100\_UPI000D64A857 . . . . . F.ETVSM . . . GICSMIGDLSGIICDGA ANGSCAMKVSTSVASGYKSVL.MAMD . . . E.THVTGN  
UniRef100\_UPI000D6A8123 . . . . . GG.Y.REVAH . . . TIVNALAIISGVICDGA KPSCAAKIAAAVDAAGILGYE.MYIH . . . G.QQFYGGD  
UniRef100\_UPI000D78245F . . . . . YS.E.QEVAW . . . CLTNTLAIAGGILCDGA KPSCAAKIAAGLQSAWLSLD.LVH . . . GG.YRFPAGE  
UniRef100\_UPI000DC1E517 . . . . . Y.NNICY . . . AVKNNMIA TLTGMVCDGA KPSCALKVSSGVSTALLSAM.LSME . . . N.HHVTEAE  
UniRef100\_UPI000DD46AB8 . . . . . L.SVYQA . . . TITNMVSDVSGIICDGA S.NSCAMKVSTVTMSAFRSVL.MARQ . . . G.IQVSPHD  
UniRef100\_UPI000DE353AA . . . . . I.HNKS . . . TIKNNMIGDVSGMICDGA KTG CALKVATVVEASFNSTI.LSLG . . . D.IEITKTE  
UniRef100\_UPI000DE3B614 . . . . . GG.Y.DEISH . . . TIVNSLAI VSGIICDGA KPSCAAKIASVEAGIVGYH.MYKN . . . G.QEFKSGD  
UniRef100\_UPI000DE3E565 . . . . . G.SL.EQIEK . . . TITNTLANVSGIVCDGA KASCAAKIASLDAAIMAHF.LAMK . . . G.NYEAET  
UniRef100\_UPI000DE4BEB8 . . . . . ENMAM . . . TINNMASSTIGMICDGA GNGCTMKGVVAVDAAYSSVN.MAMN . . . G.VYIYNAH  
UniRef100\_UPI000DE61C72 . . . . . ER.Y.EVIEH . . . AITQNLGDI SG IICDGA KASCAMKISTSTITAAFDAA.MAMA . . . G.RNLSGGD  
UniRef100\_UPI000DECC5CD . . . . . Y.KAAGM . . . AITSMMIGDVAGMICDGA S.NSCAMKVSTSAAYKAAL.MALD . . . G.ACVSGDE  
UniRef100\_UPI000DEF03C7 . . . . . GG.Y.KEIAH . . . TIVNALAIISGVICDGA KPSCAAKIAASVDAAGILGYE.MYKN . . . G.QQFRSGD  
UniRef100\_UPI000DEF259B . . . . . Y.QTVSM . . . AITSMMVGDISGMICDGA S.NSCAMKVSTSVSSAYKAAL.MAMN . . . Q.SHVTGN  
UniRef100\_UPI000DF1438D . . . . . K.EEIFS . . . SMLNVLSVSGIVCDGA KEGCALKIATAVEVAVTSK.LAVE . . . G.KSVDTKD  
UniRef100\_UPI000DF6DC3C . . . . . G.GY.CEACH . . . AVVNALISVAGMVCDA KPS CAGKIAFVSNAGILGYV.MYRD . . . G.QQFYGGD  
UniRef100\_UPI000E0A886D . . . . . F.DQVSA . . . SITCSMIGDVAGMICDGA KTS CANKVSSASAAYKAAL.MALD . . . G.IRVTGN  
UniRef100\_UPI000E294F6E . . . . . F.EAVSD . . . TICSMIGDVS GMICDGA ANGSCAMKVISTSTGYKSML.MALD . . . N.TRVTFGE  
UniRef100\_UPI000E3DD8D3 . . . . . L.PEIKC . . . AITNMMLATLQGMICDGA KATCALKIATAAGTNAITST.LALA . . . D.IQPSLE  
UniRef100\_UPI000E415A64 . . . . . G.GY.EEVIH . . . TVVNALAIISGMVCDGA KASCAAKIASVDAAGILGYN.MYLN . . . G.QQFYAGD  
UniRef100\_UPI000E415E63 . . . . . K.ELELY . . . TIVNMASSTIGMICDGA GNGCTMKGVAACDTAFRSVE.FAIE . . . G.VHIDKAH  
UniRef100\_UPI000E4A5D29 . . . . . Q.NEIKH . . . SLENVVADLSGMICDGA KAGCSLKIAATAVNSAYRSSY.LAMN . . . Q.ITVSNTD  
UniRef100\_UPI000E5516D8 . . . . . GN.Y.EAICR . . . TITNTLANVGGIVCDGA KSSCAAKIASAVDAAITAHQ.MSM . . . AG.HVFQPG  
UniRef100\_UPI000E69E6A7 . . . . . GD.Y.SAICR . . . TITNTLANVGGILCDGA KSSCAAKIASAVDAAILLAH.MSM . . . NG.VFPQGE  
UniRef100\_UPI000E686D30 . . . . . I.KVIRM . . . AITSMVGDITGMICDGA S.NSCAMKVSTGAVSAWKAAL.MALD . . . G.TSVLGDV  
UniRef100\_UPI000EFBFB3F . . . . . F.EQSCS . . . AITQNTISDTSGMICDGA KSTCANKVSSQAQSMKSSL.LAIN . . . N.HCVTKQ  
UniRef100\_UPI000EFC8C67 . . . . . Y.DQVAA . . . AVKNNMIA TLTGMICDGA KPSCAMKISTGVSTAVLSAM.MAMD . . . G.QCVTPVE  
UniRef100\_UPI000F04B479 . . . . . GD.Y.DEVSR . . . TITNTIANVGGIVCDGA KPSCAAKIASAVDAAIMAHY.LSV . . . NH.HVFEDGE  
UniRef100\_UPI000F081968 . . . . . M.KQIEG . . . DIKNMIA GSGMICDGA KVGCSYKLAISVGAAILDAAK.MAIK . . . N.IFIPDQ  
UniRef100\_UPI000F08C649 . . . . . Y.AQISH . . . AVGSMIGDVAGVICDGA KTA CANKVSSASSAAILKAAM.MAQD . . . H.HFVSGGE  
UniRef100\_UPI000F52D358 . . . . . GT.Y.EDVSH . . . TIVNALAIISGVICDGA KSSCAAKIASVEAGIFGYR.MFQD . . . G.QQFLGD  
UniRef100\_UPI000F63E4E3 . . . . . I.QQIYG . . . AITKNMIA GSGMICDGA KLG CAYKLCVSVSSAIDAAK.MALD . . . N.IYVPSND



UniRef100\_UPI000F63FEC6 . . . . . GD . . . L . . RT I SH . . . T I V N C L A I T S G I V C D G A K A S C A A K I G T A V E A G I L G Y L M I A E . . . D . . Q Q F R A G D  
UniRef100\_UPI000F6449DF . . . . . E O I D G . . . A M Q N M L G S V S G M L C D G A K D G C A L K L G N C A G E A V L A A C L A M E . . . G . S I I R Q T D  
UniRef100\_UPI000F68E51C . . . . . F . S T I S M . . . A L S S M I G D S I S G L I C D G A A N S C A M K V S T S V N S S Y K S I L M A M D . . . D . . S Y V T G N E  
UniRef100\_UPI000F778D8E . . . . . F . E V A Q N . . . A I N N M V E D S V G M V C D G A G C A C A L K V G N A V S S M Y R A V T L A Q Q . . . G . V A I P V S N  
UniRef100\_UPI000F7823C1 . . . . . Y . Q M A I S . . . A I Q N M I G D S A G M V C D G A G C S C A M K V A T S I S S M Y R S V N L A I Q . . . G . T I T P A S N  
UniRef100\_UPI000F784D51 . . . . . Y . D M A V S . . . T I N N M M G D A V G M V C D G A G C S C A M K V A S S V S S M Y R S M N L A I Q . . . G . T I S P S N N  
UniRef100\_UPI000F78F92D . . . . . F . E V A Q K . . . A I N N M A E D A V G M I C D G A G C A C A L K V G N V V S S M Y R A V K L A Q Q . . . G . V E I P V S N  
UniRef100\_UPI000F796C8D . . . . . Y . A G A C K . . . A V R N M A G D A P G M V C D G A G A S C A L K V G T A V N S M Y R A V Q L A A Q . . . D . I V P P A T N  
UniRef100\_UPI000F79C1FE . . . . . Y . E M A T A . . . T I K N M V G D A A G M V C D G A G C S C A M K V A S S V S S M Y R A M N L A I Q . . . G . I A I P G S N  
UniRef100\_UPI000F79F9B0 . . . . . F . Q T A C R . . . S I N N M A S D A A G M I C D G A G C S C A M K V A T S V A S M Y R S V N L A I M . . . Q . I A V P A S N  
UniRef100\_UPI000F79FC33 . . . . . F . Q E A C S . . . A I K N M V G D A A G M V C D G A G C S C A M K V A S S T S S M Y R A V N L A I Q . . . D . I E I P S S N  
UniRef100\_UPI000F7ACB4C . . . . . Y . E M A T A . . . S I K N M V G D V S G M V C D G A G C S C A M K V A S S V S S M Y R S M N L A I Q . . . G . T I V I P G S N  
UniRef100\_UPI000F7AFBE3 . . . . . Y . Y O A C S . . . A I K N M I G D A A G M V C D G A G C S C A M K V A S S T S S M C R A V D L A I Q . . . G . V E I P S T N  
UniRef100\_UPI000F8EDFB2 . . . . . E S . . . K . D I I E Q . . . T L V N G L V S L S G I V C D G A K P S C A G K I A I S L D G A F M G Y K Q A K M . . . N . K S Y A K G D  
UniRef100\_UPI000FD68C51 . . . . . P E I R A . . . A I Q N M L G N V T G M M C D G A K G G C A M K V A T C T S A A V Q S A L L A S R . . . G . K S I S S T N  
UniRef100\_UPI000FDD8B619 . . . . . Y . E T I A R . . . A I S S M I G D V S G M I C D G A S N S C A M K V S T S A A S A W K S V L M A I D . . . N . T G V T G N E  
UniRef100\_UPI001012BBEA . . . . . V . K O I K N . . . A I N N V L S T F L G T C D G A K K V G C A L K A G T G T F V A I Q S A E L A I N . . . N . A N I P C G N  
UniRef100\_UPI00101DE188 . . . . . K O I D G . . . T I Q N M L G N I S G M I C D G A K V G C A L K L S T A A S T A I Q S A L L A I N . . . G . H I P N Q N  
UniRef100\_UPI001021529F . . . . . G . T L . E Q I E M . . . T I T N T L A N I A G I V C D G A K A S C A A K I A S S L D A A T M A H Y L A I L R . . . G . V A F D E T C  
UniRef100\_UPI00102897E6 . . . . . F . D I A A M . . . A I S S M I G D I S G M I C D G A A N S C A M K V S T S V T S A Y K S V L M A M N . . . Q . T G V T G N E  
UniRef100\_UPI00102803B8 . . . . . A D . . . D . T I E H . . . T I V N G L A I T S G T I C D G A K P S C A A K I A M A V N A G L I G F H M A Q K . . . G . K E F V H G E  
UniRef100\_UPI00102F89E5 . . . . . A S . Y . E V M E S . . . T I K N A L G N I S G I V C D G A K P S C A A K I A I S M Q A A F M G Y E L A K R . . . H . R T F R G G D  
UniRef100\_UPI001030090E . . . . . G S . F . G O Y Q A . . . T I A N T L A N V G I V C D G A K P S C A A K I A A A V D A A I L G C D M A L . . . A N . V D F R P G E  
UniRef100\_UPI0010300BE6 . . . . . G G . L . D A V S H . . . T I V N A L A I S S G I V C D G A K A S C A G K I A A L A V D S G I L G W E M Y R Q . . . G . Q Q F L G G D  
UniRef100\_UPI0010309D70 . . . . . G D . R . A E A A H . . . T I V N A L A I T S G I I C D G A K A S C A G K I A A A V D A G I L G Y Y M Y I N . . . G . Q E F H G G D  
UniRef100\_UPI001030B3CB . . . . . A D . E . T A L A H . . . T I V N A V A I L S G T I C D G A K P S C A A K I A A S V D A G I L G Y L M Y R S . . . G . H E F K R G E  
UniRef100\_UPI001030BBEB . . . . . E O I D G . . . A I K N M I A N I S G M I C D G A K S S C A L K V S T S A S V A V Q S A L L A I N . . . G . D I T F D R N  
UniRef100\_UPI0010317AA6 . . . . . A P . F . E V I A D . . . T I T N I L G N V S G I V C D G A K P S C A A K I A S V D A A I L G H S M A M . . . D G . M T F S D G E  
UniRef100\_UPI0010318F64 . . . . . R E I H M . . . A I N N T I I N V F G V V C D G P R P A C A L K L S S A A G I A T E G A M L A M E . . . G . F E V P L G S  
UniRef100\_UPI0010321B1C . . . . . E D . . . K . T I V E E . . . T I T N A L A V N S G I I C D G A K S C A M K I A S I R N A S L A Y L Q A K S . . . D . N S F E V G D  
UniRef100\_UPI0010477C7A . . . . . L Q I E G . . . A C O N M L A N T G M I C D G A K E T C S L K L S T S A E E A V I S A Y L A M E . . . N . I I V K S N V  
UniRef100\_UPI001047AA39 . . . . . N I S P . . . T I N N I I A N Q A G I V C D G A K P S C A L K L G T A S T A V Q S A L L A I Q . . . G . T N I K A H N  
UniRef100\_UPI0010632499 . . . . . F . N I L S R . . . G I N T M I G D I S G I L C D G A A N S C S L K V A T I Q S A Y K S L L L A I E . . . E . K N V K G E D  
UniRef100\_UPI001073345B . . . . . Y . E I L T M . . . T I N S M I G D I S G I I C D G A S N S C A M K V S T S V S A A W K A V L M A I D . . . N . S S V S G T D  
UniRef100\_UPI0010E59F1D . . . . . G D . D . Y O I E S . . . A V I N T L G T L S G I I C D G A K P S C A A K I A S C V D A T A F T S V D M A I C . . . H . Q R M S D G D  
UniRef100\_UPI0010F8A622 . . . . . E D . . . R . Q I I K E . . . T L S N A L A T N S G M I C D G A K P S C A M K I A S I R S A F L A L D Q A K S . . . G . N S F K A G D  
UniRef100\_UPI0010FF47EC . . . . . L . K E I N Y . . . S I K N M V G N I S G M I C D G A K T G C A L K V S T G V S A A V Q S S L L A M N . . . N . I V I S E K E  
UniRef100\_UPI00110640D9 . . . . . G T . Y . Q Q V S L . . . T I I N T L G N V G G I V C D G A K P S C A A K I A S S V D A A L M A F H M S I . . . Q N . K S F L P G E  
UniRef100\_UPI0011069AFD . . . . . G T . A . E O I E N . . . T V V N T I V N A G G I T C D G A K P S C A A K I F S S L Q A A F L G H S L A M . . . K G . F R F E A G E  
UniRef100\_UPI0011070C3B . . . . . G . G L . K E I A H . . . T L V N C L A I T S G I V C D G A K S S C A A K I A V A I D A A I L G Y A M Y E D . . . G . Q Q F R A G E  
UniRef100\_UPI001107153E . . . . . K O V A A . . . A M O N T I P N V F G V V C D G A K L A C A L R I S S G T G I A L E C S D L A I S . . . Q . V R I A N N Q  
UniRef100\_UPI001158928E . . . . . Y . E N I A M . . . A V N N M I G D V S G M I C D G A G S C A M K V S T S I A S A W K A I L L A I D . . . N . S V V S C N D  
UniRef100\_UPI0011589DBD . . . . . L . D Q V K Y . . . A I K N M A G N I V G M I C D G A K T G C A L K V S T G V S A A I Q S A L L A I E . . . N . I E I S D K D  
UniRef100\_UPI00115D02D5 . . . . . F . D T I A M . . . A I N N M I G D V S G I I C D G A S G S C A M K V S T S I S S A W K A I L L A I D . . . N . S V V S G N D  
UniRef100\_UPI001178C98E . . . . . G G . Y . K E I A H . . . T I V N A L S I V S G I V C D G A K A S C A A K I A A G V D A G I L G Y H M Y K Q . . . G . Q Q F R D G D  
UniRef100\_UPI001183AA94 . . . . . P . D M A E H . . . A V A S L I S S M G M L C D G A K P S C G L K V S A A A G E A Y A A L M A M D . . . K . R G V Q Q D E  
UniRef100\_UPI00119CAB58 . . . . . Q P . . . E . N I L E E . . . M I S N L S V N S G L L C D G A K P S C A M K I A S S L R N A F L A Y E Q A K S . . . N . N S F K I G D  
UniRef100\_UPI0011A1EBECF . . . . . Y . E P V A L . . . A T G S M I G D I S G I I C D G A A N S C A M K V S T S V S A A Y K A V L M A I D . . . S . S G V T G N E  
UniRef100\_UPI0011AA74CD . . . . . Q O I K A . . . A I Q N T I G N V S G M I C D G A K A G C A M K V S T C S N A V Q S A L L A I N . . . H . Q E I Q S T D  
UniRef100\_UPI0011A6BE87 . . . . . G T . L . E O I G A . . . T V V N T L A N V G G I V C D G A K S S C A A K I S A A V D A A I L G H D M A M . . . A G . R S F R A G E  
UniRef100\_UPI0011C3E3AE . . . . . G S . Y . E M V C D . . . A I T N I L G N I S G V I C D G A K A S C A M K I S S G I Y S A F D A T M L A I H . . . K . D Y L K S G D  
UniRef100\_UPI0011C7A661 . . . . . E H M K Y . . . T I N N M A S I T G M I C D G N I G C V M K G I V A I D A A Y R A I E L A M N . . . N . I Y E I D I H  
UniRef100\_UPI0011C7B96A . . . . . F . K E I C F . . . A I R N M V A T I A G M I C D G A K N S C A L K V A S A E A A V H A A F L A K R . . . G . T A V S G R E  
UniRef100\_UPI0011C9D6B6 . . . . . E S . M . E V I S N . . . T I I N S I A T I G M V C D G A K P S C A A K I R S A V D T A M L A Y R L A K . . . D G . R V Y Q S G E  
UniRef100\_UPI0011C9F067 . . . . . Y . E E V T F . . . A V K N M I A N L T G M I C D G A K P S C A M K L T S G V S T A V L S A M M A I E . . . H . R C V T A F E  
UniRef100\_UPI0011CBAB3A . . . . . A . Q H I A G . . . A I K N L T E D L A G I I C D G A K A G C A L K L A T A A G T A V Q A A L F S L H . . . G . V N V N T V D  
UniRef100\_UPI0011CC227F . . . . . R O I E G . . . A I E N M V A N I S G M I C D G A K A G C A L K L A S A A A V Q S A I I A K Q . . . E . C Y V P P M N  
UniRef100\_UPI0011CC5522 . . . . . D . H O I E A . . . S I L N M I S G L T G M L C D G A K L G C A Y K L A V A V D A A A D A S N M A I S . . . K . V H I P G D N  
UniRef100\_UPI0011DDB73B . . . . . G T . L . A Q I S S . . . T I V N T L A D V G G I V C D G A K P S C A A K I A S A V D A A T M A H N M S M . . . R S . R S F Q A G E  
UniRef100\_UPI0011DDBD5E . . . . . Y . D E V A A . . . A V K N M I A N L T G M I C D G A K P S C A M K L T S G V S T A V I S A M M A M D . . . G . H C V T P V E  
UniRef100\_UPI0011DE2D02 . . . . . G T . Y . E O I E N . . . T I T N A I A T L S G I V C D G A K A S C A A K I A T A V D S A I L A H K M A M S . . . G . D V L K S G E  
UniRef100\_UPI001243264B . . . . . L . N A I N R . . . T I K N M V A D V S G M V C D G A K S G C A L K I S T T V V S T A V L C A A L A M E . . . G . V E V S S N E  
UniRef100\_UPI00124490F0 . . . . . A . Q H I A G . . . A I K N L T E D L A G I I C D G A K A G C A L K L A T A A G T A V Q A A L F S L Q . . . G . Q N V L C T D  
UniRef100\_UPI00124740AD1 . . . . . G G . Y . E E I A H . . . T V N N A L A I A S G I I C D G A K A S C A A K I S A S V D V G I L G Y Y M Y K E . . . G . Q V F V D G D  
UniRef100\_UPI001248AE0F . . . . . L . K E A F G . . . A I K N M V G S I A G M I C D G A K P A C S L K V A S A E A A V Q A A F L A K R . . . G . T S A N G H E  
UniRef100\_UPI00125871DF . . . . . Y . H O I G G . . . S I K N M V A D V T G V I C D G A K I G C S L K L S T A A G V A V K S A Y L A I E . . . N . I I V P A D N  
UniRef100\_UPI001258984B . . . . . H H I E G . . . A I K N I L A D I S G I V C D G A K V G C A L K L S T S V A S A I Q A A L L A I D . . . N . R I V P T G N  
UniRef100\_UPI001258767C . . . . . E . S O I F K . . . S M L N M V G S I T G L I C D G G K E G C A Y K I L A S A W A V K A A L L A O K . . . G . V A V H E D N  
UniRef100\_UPI00128B840A . . . . . L . N N I K C . . . S L V K N M I A D I Y G M I C D G A K S T C A L K I A T G I Q A A I Q C S I L A M H . . . D . I E P T S N D  
UniRef100\_UPI00128B8528 . . . . . F . Q O L G M . . . T I K N M T G S V T G M I C D G A K Y G C S H K I S A S V S A A I Q S S L L A M N . . . H . N C L N G M N  
UniRef100\_UPI00129AC328 . . . . . G T . G F . Q A V E N . . . A I F N M L G D I S G I F C D G A K S C S M K V S T S A A A I K S A M L A V D . . . G . I R V T E N E  
UniRef100\_UPI0012AB7299 . . . . . L . R E L K C . . . A I N N M V A A L Q M I C D G A K S T C A L K I A A G T N A A V T C S T L A I A . . . D . I A P T S M D  
UniRef100\_UPI0012ABE8FD . . . . . L . E A L N R . . . T I D N M A A I T G M I C T G G N H C C C L K V V S A V D C A F T A S S L A V H . . . G . A A V G A P H  
UniRef100\_UPI0012ADCC21 . . . . . L . S H I N S . . . T I K N M T G T V T G M I C D G A N S C A L K I S A S V S A A I Q S S L L A I N . . . S . Q S L N N M D  
UniRef100\_UPI0012AF4322 . . . . . E A I T R . . . A V I Q N M A S G L T G M I C D G G N H G C T M K G I V A V D A A F R A A D M A M D . . . G . V C I E D I H  
UniRef100\_UPI0012AF8FD9 . . . . . D . Q O M G W . . . V I R N M T G A I S G M I C D G K V G C A L K A Q A S A T A A A F L C A R M A I N . . . N . V L R L P T D  
UniRef100\_UPI0012B1F23C . . . . . D E M K D . . . V I N N M A S I T G M I C D G G N Q G C V M K G V A A V E T I W R S V D L A M N . . . G . A S I S W N H  
UniRef100\_UPI0012B202BF . . . . . H . V O I Q G . . . S I N N M I A S I T G M I C D G A K L G C S Y K L S I S V D A A I D A S N M A I K . . . N . I F I P I D N  
UniRef100\_UPI0012B20D78 . . . . . G S . F . A Q Y E A . . . T I V N T L A N V G G I V C D G A K P S C A A K I S A A V D A A I L G C D M A I . . . S D . D N F L A G D  
UniRef100\_UPI0012B29F2C . . . . . G G . Y . Q E V V H . . . T I V N T L A I V S G I V C D G A K A S C A A K I A S A V D A G I L G Y H M Y I R . . . G . Q Q F Y G G D  
UniRef100\_UPI0012B2C833 . . . . . G G . Y . D E I S H . . . T I V N S V A I L S G T I C D G A K S S C A A K I A L A V E A G I L G F Q M Y K N . . . G . Q E F V G G D  
UniRef100\_UPI0012B2DDAA . . . . . G N . E . K O I S D . . . T V A N T L A N I S G I I C D G A S A S C A A K I A T S V D A A I M G S I M A R E . . . N . N A F M S G D  
UniRef100\_UPI0012B2EB59 . . . . . K N I E G . . . S I K N M G G V T G I I C D E V K E G C S L K I R T N T E N A I M S A Y L S M E . . . D . I V S I T K D  
UniRef100\_UPI0012B35B19 . . . . . G . G Y . K E V I H . . . T V N N A I A V S G I I C D G A K A S C A A K I A S A V D A G I L G Y N M Y I N . . . G . Q E F Y A G D  
UniRef100\_UPI0012B366A0 . . . . . E D . . . K . T I I K D . . . T I I N S L A V N S G I I C D G A K S S C A M K I A S S L R N A A L A Y E Q A H N . . . Y . K S F K S G D  
UniRef100\_UPI0012B3DC24 . . . . . E O I S G . . . S V O N M L A N I T G M V C D G A K E T C T L K L S T S A G E A V L S S Y L A I D . . . N . I I V K P D N  
UniRef100\_UPI0012B3FC58 . . . . . G E . E . A E I S K . . . A I S N T L A M V G G I V C D G A K A S C A A K I S S S L E A A I L A M E M S L E . . . E K . T A F Q S G E  
UniRef100\_UPI0012B4284B . . . . . R D . L . K I I G E . . . T V N N A I S T I G M V C D G A K S S C A A K I A M S L S T S F L A Y D M A I . . . N G . I S F K A G E  
UniRef100\_UPI0012B42F45 . . . . . S E M D K . . . C L R N M A S S I T G M I C D G G N H G C A M K G I A A C D A A F R S A D L A M A . . . G . I S I E D I H  
UniRef100\_UPI0012B4B74C . . . . . G N . V . E D I S Q . . . T I T N T I A N V G G I V C D G A K S S C A A K I A S S V D A A I L A H S M G S . . . K K . R C F K P G E  
UniRef100\_UPI0012B59954 . . . . . F . K A V S M . . . A I S N M I G D V S G M I C D G A A N S C S M K V S T A V G A C K A V L M A I E . . . G . T R V T G D E  
UniRef100\_UPI0012B59A5D . . . . . G G . Y . D A V V H . . . T I V N A L I T S G M V C D G A K A S C A A K I S A A V D A G I L G F E M Y R N . . . G . Q Q F Y D G D  
UniRef100\_UPI0012BA6B36 . . . . . G S . D . E Q I E Y . . . A V I N T L G T L S G M I C D G A K A S C A A K I A T G V D T A F T C V D M A I R . . . N . Q C M S A G D  
UniRef100\_UPI0012BB2EF8 . . . . . Q O M I N . . . A A Q I L L G N L C C V L C D G A K E N C S L K I S T A A V E A V Q A G Q M A H L . . . G I . N P E A G A  
UniRef100\_UPI0012BB69D0 . . . . . P E I A C . . . A I S N V L G N V A G M L C D G A K A S C A L K I S T C T N A A M L A A T L A M R . . . R . L R V A S N E  
UniRef100\_UPI0012BB73BB . . . . . L . E O A G S . . . A I F N M F G D V T G M F C D G A K T G C S L K V S T S A S A A K A A L L A I D . . . G . T R I T G H E  
UniRef100\_UPI0012BB8C85 . . . . . E E V E C . . . A Q T M I G D V T G M I C D G G K P N C A V K V A T C I N S A C R A A L L G M E . . . H . I R P G S R E  
UniRef100\_UPI0012BC4B69 . . . . . E K M V G . . . A V Q S V I G T F A G M L C D G A K V S C A Y K V A T V A A T A V Q F A Q L A M N . . . . G A N V E P G D  
UniRef100\_UPI0012BD8E78 . . . . . E S . . . K . E I I E K . . . T L T N A L A T N S G I I C D G A K P S C A S K I A S S L R N A F L S F D Q A K T . . . E . N S F V S G D  
UniRef100\_UPI0012BD958B . . . . . E P . . . K . E V W E . . . T L S N A L V G T F G V V C D G A K A S C A M K I G S L G N A I L S Y R Q A K S . . . N . N S F K N G D  
UniRef100\_UPI0012C524A0 . . . . . E D . . . E . K I I K E . . . T L K N A L T N S G I I C D G A K A S C A I K I A S S L K M S P L A Y K Q A K E . . . G . N S F K A G D  
UniRef100\_UPI0012EE9FA7 . . . . . K A I G F . . . A I Q N M I G N V T G M L C D G A K A D C A L K I S T C T N A A M Q A A F M A M K . . . G . L C V Q K T D  
UniRef100\_V2Y2N1 . . . . . A T . . . L . S E V E D . . . T I I N A L A I T S G I I C D G A K A S C A A K I A A S V D A G I M G F N M S K E . . . G . Q R F K G G D

|                         |             |           |    |     |     |       |          |          |         |       |       |       |           |           |                   |               |      |               |   |   |   |
|-------------------------|-------------|-----------|----|-----|-----|-------|----------|----------|---------|-------|-------|-------|-----------|-----------|-------------------|---------------|------|---------------|---|---|---|
| UniRef100_V4JGF5        | .....V.EH   | MAG...A   | IK | NIL | ED  | L     | AGVICDGA | KAG      | CALK    | NT    | A     | GA    | AV        | QAAL      | FSL               | Q....G.VNVKDT | D    |               |   |   |   |
| UniRef100_V6IYT76       | .....GD..Y. | DVIAH...  | T  | IV  | NS  | VAIT  | S        | GMICDGA  | KPS     | CAAKI | SA    | AV    | DAGILGYQ  | MYQN      | ....D.QQFSSG      | D             |      |               |   |   |   |
| UniRef100_V7IAR5        | .....YD.Y.  | KTISS...  | I  | VT  | NT  | IAIT  | T        | GGVICDGA | KPS     | CASKI | AM    | LD    | NMIMAIN   | MSR       | ....EG.RTFHQGE    | D             |      |               |   |   |   |
| UniRef100_W1IUK4        | .....Y.Y.   | PQVAM...  | A  | I   | C   | SMIGD | S        | GMICDGA  | KNS     | CAMKV | T     | S     | VSSAYKAVL | MAID      | ....N.SGVRGS      | D             |      |               |   |   |   |
| UniRef100_W2BZQ9        | .....WE.V.  | PQIEK...V | IE | SIL | VN  | VGGI  | CDGA     | KST      | CAAKL   | AT    | AL    | DA    | MLTSLD    | MLE       | ....AG.FEGLDE     | D             |      |               |   |   |   |
| UniRef100_W8T7L5        | .....E      | EALIEG... | A  | I   | S   | NVIAN | L        | S        | GMICDGA | KAG   | CAYKL | S     | AAAA      | MQSAI     | NVKY....G.SIVPKFN | D             |      |               |   |   |   |
| UniRef100_X1EDB0        | .....K      | EQILG...  | S  | M   | Y   | NMV   | GA       | LAI      | I       | IDR   | C     | PRGR  | LKRS      | EK        | ....N.SCVRGS      | D             |      |               |   |   |   |
| UniRef100_X6QCS0        | .....Y..E   | EVVAM...  | A  | I   | S   | SMIGD | S        | GMICDGA  | KNS     | CAMKV | T     | S     | AAAYKAVL  | MAID      | ....N.SRVGTNE     | D             |      |               |   |   |   |
| UniRef100_A0A0J5P7T7    | .....F..Q   | AIISM...  | A  | I   | C   | SMIGD | S        | IGVLC    | DGA     | ANS   | CAMKV | T     | S         | AAAYKAVL  | MAID              | ....N.SRVGTNE | D    |               |   |   |   |
| UniRef100_A0A2U8FHH0    | .....F..E   | AISM...   | A  | I   | C   | SMIGD | S        | IGVLC    | DGA     | ANS   | CAMKV | T     | S         | VSSYKASIL | MAID              | ....D.TQVTGN  | D    |               |   |   |   |
| UniRef100_A0A3N4VLT4    | .....F..N   | VISM...   | A  | I   | C   | SMIGD | S        | IGVLC    | DGA     | ANS   | CAMKV | T     | S         | VSSAYKAVL | MAID              | ....D.SRVGTNE | D    |               |   |   |   |
| UniRef100_A0A3N4W6L3    | .....F..N   | AISM...   | A  | I   | C   | SMIGD | S        | IGVLC    | DGA     | ANS   | CAMKV | T     | S         | VSSAYKAVL | MAID              | ....N.SRVGTNE | D    |               |   |   |   |
| UniRef100_A0A3R8MG26    | .....F..K   | AVSQ...   | A  | I   | C   | SMIGD | S        | IGVLC    | DGA     | ANS   | CAMKV | T     | S         | VSSAYKAVL | MALE              | ....N.SRVGTNE | D    |               |   |   |   |
| UniRef100_UP10004ED7B54 | .....F..N   | AIISM...  | A  | I   | C   | SMIGD | S        | IGVLC    | DGA     | ANS   | CAMKV | T     | S         | VSSYKAVL  | MAID              | ....N.SRVGTNE | D    |               |   |   |   |
| UniRef100_A0A1C5QX57    | .....G..S   | ISQIKK... | T  | E   | INT | L     | AN       | I        | PGI     | CDGA  | KIS   | CAAKI | AAS       | LDA       | AF                | LAHH          | LAMN | ....G.QSYAPYT | D |   |   |
| UniRef100_A0A448W3N0    | .....G..D   | ISLKK...  | N  | D   | REY | P     | CQYS     | GNHL     |         |       |       |       |           |           |                   |               |      |               |   |   |   |
| UniRef100_G6C136        | .....M..I   | KTICE...  | N  | I   |     |       |          |          |         |       |       |       |           |           |                   |               |      |               |   |   |   |
| UniRef100_UP10007B3E538 | .....Q      | QPLSV     | I  | E   | IT  | NT    | L        | AT       | I       | S     | G     | M     | L         | C         | D                 | G             | A    | K             | P | S |   |
| UniRef100_A0A564VK10    | .....A      | QVSK...   | A  | M   | K   | N     | M        | I        | S       | A     | L     | S     | G         | V         | I                 | C             | D    | G             | A | K | L |
| UniRef100_A0A1F7RGL9    | .....V      | QVSK...   | A  | M   | K   | N     | M        | I        | S       | A     | L     | S     | G         | V         | I                 | C             | D    | G             | A | K | L |
| UniRef100_A0A1F7S1R1    | .....T      | QVEK...   | A  | M   | K   | N     | M        | I        | S       | A     | L     | S     | G         | V         | I                 | C             | D    | G             | A | K | L |
| UniRef100_A0A3M1RZ09    | .....P      | KQ....L   |    |     |     |       |          |          |         |       |       |       |           |           |                   |               |      |               |   |   |   |
| UniRef100_A0A5C9EBK1    | .....A      | EVINA...  | I  | V   | R   | T     | S        | L        | G       | N     | O     | A     | G         | I         | I                 | C             | D    | G             | A | K | L |
| UniRef100_A0A358LCV7    | .....K      | EQISD...  | I  | V   | R   | T     | S        | L        | G       | N     | O     | A     | G         | I         | I                 | C             | D    | G             | A | K | L |
| UniRef100_A0A525D9V7    | .....P      | QEQIND... | M  | L   | C   | T     | S        | Q        | V       | M     | C     | G     | V         | C         | D                 | G             | A    | K             | L | P | S |
| UniRef100_R6ICAI        | .....K      | EQISD...  | M  | L   | C   | T     | S        | Q        | V       | M     | C     | G     | V         | C         | D                 | G             | A    | K             | L | P | S |
| UniRef100_UP10009321914 | .....A      | KQIND...  | L  | V   | T   | G     | V        | T        | C       | W     | S     | M     | G         | F         | V                 | C             | D    | G             | A | K | L |
| UniRef100_UP10009ABF8C2 | .....N      | QIKE...   | S  | I   | N   | L     | Y        | L        | S       | T     | S     | M     | G         | F         | V                 | C             | D    | G             | A | K | L |
| UniRef100_A0A0941IH7    | .....E      | QIKK...   | S  | I   | N   | L     | Y        | L        | S       | T     | S     | M     | G         | F         | V                 | C             | D    | G             | A | K | L |
| UniRef100_A0A2A1ZQZ3    | .....N      | DKD...    | A  | M   | N   | L     | Y        | L        | S       | T     | S     | M     | G         | F         | V                 | C             | D    | G             | A | K | L |
| UniRef100_A0A2N1PKM8    | .....E      | EAEAN...  | A  | I   | N   | T     | V        | I        | G       | S     | I     | G     | M         | L         | C                 | D             | G    | A             |   |   |   |

Figure S1. Multisequence alignment produced by RoseTTAFold of two regions with the conserved cysteines of TtcA proteins. The first sequence and numbering correspond to EcTtcA.



|                                | 120 | 130    | 140   | 150 | 160 | 170 |
|--------------------------------|-----|--------|-------|-----|-----|-----|
| 124995                         |     | E. GKT | T. CS | LS  | RL  | RR  |
| tr A0A2P8VLK6 A0A2P8VLK6_9ENTR |     | E. GKT | T. CS | LS  | RL  | RR  |
| tr A0A0H319P2 A0A0H319P2_PECSS |     | E. GKT | T. CS | LS  | RL  | RR  |
| tr A0A2X2A3V8 A0A2X2A3V8_9GAMM |     | E. GKT | T. CS | LS  | RL  | RR  |
| tr A0A1K1LJ61 A0A1K1LJ61_9PROT |     | E. GR  | T. CS | LS  | RL  | RR  |
| tr A0A154U724 A0A154U724_NEIFL |     | E. GKT | T. CS | LS  | RL  | RR  |
| tr A0A1V2DX27 A0A1V2DX27_9ALTE |     | E. GKT | T. CS | LS  | RL  | RR  |
| tr WOHXPO WOHXPO_9GAMM         |     | E. GKT | T. CS | LS  | RL  | RR  |
| tr A0A265QRM6 A0A265QRM6_AGGAC |     | E. GKT | T. CS | LS  | RL  | RR  |
| tr A0A1B6B2J0 A0A1B6B2J0_ALCFA |     | E. GKT | T. CS | LS  | RL  | RR  |
| tr A0A2U8FW74 A0A2U8FW74_9BURK |     | E. GKT | T. CS | LS  | RL  | RR  |
| tr A0A246J2Z4 A0A246J2Z4_9BURK |     | E. GKT | T. CS | LS  | RL  | RR  |
| tr A0A0U3KA27 A0A0U3KA27_9BURK |     | P. GKT | T. CS | LS  | RL  | RR  |
| tr A0A099LFJ1 A0A099LFJ1_9GAMM |     | E. GKT | T. CS | LS  | RL  | RR  |
| tr A0A2N4XR11 A0A2N4XR11_9RHOO |     | E. GKT | T. CS | LS  | RL  | RR  |
| tr C6X8M4 C6X8M4_METGS         |     | E. GKT | T. CS | LS  | RL  | RR  |
| tr A0A1I2G6V5 A0A1I2G6V5_9BURK |     | E. GKT | T. CS | LS  | RL  | RR  |
| tr F7RWZ5 F7RWZ5_9GAMM         |     | E. GKT | T. CS | LS  | RL  | RR  |
| tr A0A1C6LTR8 A0A1C6LTR8_9NEIS |     | E. GKT | T. CS | LS  | RL  | RR  |
| tr A0A1F4M1Z4 A0A1F4M1Z4_9BURK |     | E. GKT | T. CS | LS  | RL  | RR  |
| tr A0A1D8J3B6 A0A1D8J3B6_9BURK |     | E. GKT | T. CS | LS  | RL  | RR  |
| tr A0A2A2AP57 A0A2A2AP57_9BURK |     | E. GKT | T. CS | LS  | RL  | RR  |
| tr A0A0K6GZP4 A0A0K6GZP4_9NEIS |     | E. GKT | T. CS | LS  | RL  | RR  |
| tr A0A0S9F0W6 A0A0S9F0W6_9BURK |     | E. GKT | T. CS | LS  | RL  | RR  |
| tr A0A1N7A9F0 A0A1N7A9F0_9GAMM |     | E. GKT | T. CS | LS  | RL  | RR  |
| tr A0A1F4G480 A0A1F4G480_9BURK |     | E. GKT | T. CS | LS  | RL  | RR  |
| tr A0A2S0P7B7 A0A2S0P7B7_9NEIS |     | E. GKT | T. CS | LS  | RL  | RR  |
| tr K2BEF1 K2BEF1_9ZZZZ         |     | E. GQ  | T. CS | LS  | RL  | RR  |
| tr A0A1D9GWF3 A0A1D9GWF3_9BURK |     | E. GKT | T. CS | LS  | RL  | RR  |
| tr A0A163CB63 A0A163CB63_9NEIS |     | E. GKT | T. CS | LS  | RL  | RR  |
| tr D2TZ97 D2TZ97_9GAMM         |     | A. GKT | T. CS | LS  | RL  | RR  |
| tr A0A0P0MIV0 A0A0P0MIV0_9BURK |     | E. GKT | T. CS | LS  | RL  | RR  |
| tr L2EN66 L2EN66_9BURK         |     | E. GKT | T. CS | LS  | RL  | RR  |
| tr A0A0P1D2N2 A0A0P1D2N2_9NEIS |     | E. GKT | T. CS | LS  | RL  | RR  |
| sp Q12N51 TTCA_SHEDO           |     | E. GKT | T. CS | LS  | RL  | RR  |
| tr A0A1U9JN14 A0A1U9JN14_9NEIS |     | E. GKT | T. CS | LS  | RL  | RR  |
| tr A0A1Y5D1A3 A0A1Y5D1A3_9GAMM |     | E. GKT | T. CS | LS  | RL  | RR  |
| tr A0A1L8MBV1 A0A1L8MBV1_9ALTE |     | E. GKT | T. CS | LS  | RL  | RR  |
| tr A0A080K7B7 A0A080K7B7_9NEIS |     | E. GKT | T. CS | LS  | RL  | RR  |
| tr A0A2N9X7G9 A0A2N9X7G9_9NEIS |     | E. GKT | T. CS | LS  | RL  | RR  |
| tr A0A248LMP6 A0A248LMP6_9NEIS |     | E. GKT | T. CS | LS  | RL  | RR  |
| tr G2IW96 G2IW96_PSEUL         |     | E. GKT | T. CS | LS  | RL  | RR  |
| tr A0A136H2U1 A0A136H2U1_9GAMM |     | E. GKT | T. CS | LS  | RL  | RR  |
| tr A0A0M2V1O9 A0A0M2V1O9_9GAMM |     | E. GKT | T. CS | LS  | RL  | RR  |
| tr A0A0T9PB77 A0A0T9PB77_9GAMM |     | E. GKT | T. CS | LS  | RL  | RR  |
| tr A0A1I7MJ66 A0A1I7MJ66_9GAMM |     | A. GKT | T. CS | LS  | RL  | RR  |
| sp B1KFY6 TTCA_SHEWM           |     | E. GQ  | T. CS | LS  | RL  | RR  |
| tr A0A1H8PUT2 A0A1H8PUT2_9BURK |     | P. GKT | T. CS | LS  | RL  | RR  |
| sp Q15U56 TTCA_PSEAG           |     | E. GKT | T. CS | LS  | RL  | RR  |
| sp A1VJK9 TTCA_POLNA           |     | E. GKT | T. CS | LS  | RL  | RR  |
| tr A0A1X0W1Y8 A0A1X0W1Y8_9GAMM |     | E. GKT | T. CS | LS  | RL  | RR  |
| tr A0A0A3BCG4 A0A0A3BCG4_9PAST |     | E. GKT | T. CS | LS  | RL  | RR  |
| tr A0A0C3QY96 A0A0C3QY96_9GAMM |     | E. GKT | T. CS | LS  | RL  | RR  |
| tr A0A1Z9XC69 A0A1Z9XC69_9ALTE |     | E. GKT | T. CS | LS  | RL  | RR  |
| tr A0A2D7GR50 A0A2D7GR50_ALTSX |     | E. GKT | T. CS | LS  | RL  | RR  |
| tr A0A1F4GZB8 A0A1F4GZB8_9BURK |     | E. GKT | T. CS | LS  | RL  | RR  |
| tr A0A2M8RY88 A0A2M8RY88_9PAST |     | E. GKT | T. CS | LS  | RL  | RR  |
| tr A0A1X3DH74 A0A1X3DH74_9NEIS |     | E. GKT | T. CS | LS  | RL  | RR  |
| tr A0A1R4IF13 A0A1R4IF13_9VIBR |     | E. GKT | T. CS | LS  | RL  | RR  |
| tr A0A0H4HWD6 A0A0H4HWD6_HAEDC |     | E. GKT | T. CS | LS  | RL  | RR  |
| sp A8FVF7 TTCA_SHESH           |     | E. GQ  | T. CS | LS  | RL  | RR  |
| tr A0A1B3LJ13 A0A1B3LJ13_9PROT |     | E. GKT | T. CS | LS  | RL  | RR  |
| tr HOPFW8 HOPFW8_9RHOO         |     | E. GKT | T. CS | LS  | RL  | RR  |
| tr A0A2G3K5C5 A0A2G3K5C5_9BURK |     | D. GKT | T. CS | LS  | RL  | RR  |
| tr ROE3E6 ROE3E6_RALPI         |     | E. GKT | T. CS | LS  | RL  | RR  |
| tr A0A2SON4V1 A0A2SON4V1_9BURK |     | E. GKT | T. CS | LS  | RL  | RR  |
| tr A0A167IKV2 A0A167IKV2_9BURK |     | E. GKT | T. CS | LS  | RL  | RR  |
| tr N6Y5V6 N6Y5V6_9RHOO         |     | E. GKT | T. CS | LS  | RL  | RR  |
| tr A0A151JF95 A0A151JF95_9VIBR |     | E. GKT | T. CS | LS  | RL  | RR  |
| tr A0A0F4PF68 A0A0F4PF68_9VIBR |     | E. GKT | T. CS | LS  | RL  | RR  |
| tr A0A2I5T7N7 A0A2I5T7N7_SER53 |     | E. GKT | T. CS | LS  | RL  | RR  |
| tr A0A2M8S5Q1 A0A2M8S5Q1_9PAST |     | E. GKT | T. CS | LS  | RL  | RR  |
| tr A0A1D9BE07 A0A1D9BE07_9NEIS |     | E. GKT | T. CS | LS  | RL  | RR  |
| tr A0A0L7T4H2 A0A0L7T4H2_9GAMM |     | E. GKT | T. CS | LS  | RL  | RR  |
| tr A0A1B7L7X3 A0A1B7L7X3_9ENTR |     | E. GKT | T. CS | LS  | RL  | RR  |
| sp Q013K3 TTCA_HAES1           |     | E. GKT | T. CS | LS  | RL  | RR  |
| tr A0A257CR00 A0A257CR00_9BURK |     | E. GKT | T. CS | LS  | RL  | RR  |
| tr WQ02T6 WQ02T6_9PAST         |     | E. GKT | T. CS | LS  | RL  | RR  |
| tr A0A1B7UI15 A0A1B7UI15_9GAMM |     | E. GKT | T. CS | LS  | RL  | RR  |
| tr A0A0N0GL12 A0A0N0GL12_9NEIS |     | E. GKT | T. CS | LS  | RL  | RR  |
| tr A0A2E3M490 A0A2E3M490_9RICK |     | E. GKT | T. CS | LS  | RL  | RR  |
| tr A0A011NQM2 A0A011NQM2_9PROT |     | A. GKT | T. CS | LS  | RL  | RR  |
| tr A0A109RUW1 A0A109RUW1_9BURK |     | E. GKT | T. CS | LS  | RL  | RR  |
| tr A0A1S8YQ17 A0A1S8YQ17_9ENTR |     | E. GKT | T. CS | LS  | RL  | RR  |
| tr A0A068Z3J7 A0A068Z3J7_9GAMM |     | A. GKT | T. CS | LS  | RL  | RR  |
| tr A0A085GT12 A0A085GT12_HAFAL |     | E. GKT | T. CS | LS  | RL  | RR  |
| tr A0A1X3RLS0 A0A1X3RLS0_9GAMM |     | E. GKT | T. CS | LS  | RL  | RR  |
| tr A0A2U0SNX6 A0A2U0SNX6_9PAST |     | E. GKT | T. CS | LS  | RL  | RR  |
| tr A0A1A9AYD0 A0A1A9AYD0_PLESH |     | E. GKT | T. CS | LS  | RL  | RR  |
| tr A0A2T7SXT3 A0A2T7SXT3_9BURK |     | E. GKT | T. CS | LS  | RL  | RR  |
| tr I3DD15 I3DD15_HAEPH         |     | E. GKT | T. CS | LS  | RL  | RR  |
| tr A0A2D9KIY0 A0A2D9KIY0_9ALTE |     | E. GKT | T. CS | LS  | RL  | RR  |
| sp Q65TL6 TTCA_MANSM           |     | E. GKT | T. CS | LS  | RL  | RR  |
| tr A0A2H9TAV4 A0A2H9TAV4_9ZZZZ |     | E. GKT | T. CS | LS  | RL  | RR  |
| tr A0A1E7ZF70 A0A1E7ZF70_9ALTE |     | E. GKT | T. CS | LS  | RL  | RR  |
| tr A0A2G8EIK3 A0A2G8EIK3_9GAMM |     | E. GKT | T. CS | LS  | RL  | RR  |
| tr A0A2G8C3Z3 A0A2G8C3Z3_9GAMM |     | E. GKT | T. CS | LS  | RL  | RR  |
| tr A0A285J8N9 A0A285J8N9_9GAMM |     | E. GKT | T. CS | LS  | RL  | RR  |
| tr E0LVH6 E0LVH6_9GAMM         |     | E. GKT | T. CS | LS  | RL  | RR  |
| tr A0A2J9E917 A0A2J9E917_9GAMM |     | E. GKT | T. CS | LS  | RL  | RR  |
| tr I3DI62 I3DI62_9PAST         |     | E. GKT | T. CS | LS  | RL  | RR  |
| tr A0A0H3DTH0 A0A0H3DTH0_EDWTF |     | E. GKT | T. CS | LS  | RL  | RR  |
| tr A0A0U5L641 A0A0U5L641_9GAMM |     | E. GKT | T. CS | LS  | RL  | RR  |

|                                |           |        |       |    |     |     |   |    |      |      |      |      |    |     |    |    |    |    |    |    |    |    |    |    |    |    |    |    |   |   |   |   |   |   |   |   |   |   |   |   |   |
|--------------------------------|-----------|--------|-------|----|-----|-----|---|----|------|------|------|------|----|-----|----|----|----|----|----|----|----|----|----|----|----|----|----|----|---|---|---|---|---|---|---|---|---|---|---|---|---|
| tr A0A2N5EAD2 A0A2N5EAD2_9GAMM | . . . . . | E. GKT | T. CS | LS | SRL | RRG | I | LY | . RT | A    | TEL  | G    | CT | KI  | AL | G  | H  | R  | DD | M  | L  | Q  | T  | LF | LN | M  | F  | Y  | G | K | L | K | G | M | P | P | K | L |   |   |   |
| tr A0A1X1MR97 A0A1X1MR97_9VIBR | . . . . . | E. GKT | T. CS | LS | SRL | RRG | I | LY | . RN | A    | KEL  | G    | A  | T   | KI | AL | G  | H  | R  | DD | I  | E  | T  | LF | LN | M  | F  | Y  | G | K | L | K | G | M | P | P | K | L |   |   |   |
| tr A0A0U4V2L4 A0A0U4V2L4_9GAMM | . . . . . | E. GKT | T. CS | LS | SRL | RRG | I | LY | . RT | A    | KEL  | G    | A  | T   | KI | AL | G  | H  | R  | DD | I  | E  | T  | LF | LN | M  | F  | Y  | G | K | L | K | G | M | P | P | K | L |   |   |   |
| tr D2TAQ3 D2TAQ3_ERWP6         | . . . . . | E. GKT | T. CS | LS | SRL | RRG | I | LY | . RT | A    | SEL  | G    | C  | S   | KI | AL | G  | H  | R  | DD | I  | L  | Q  | T  | LF | LN | M  | F  | Y | G | K | L | K | G | M | P | P | K | L |   |   |
| tr A0A1H7QGZ9 A0A1H7QGZ9_9GAMM | . . . . . | E. GKT | T. CS | LS | SRL | RRG | I | LY | . RT | A    | KEL  | G    | A  | T   | KI | AL | G  | H  | R  | DD | I  | E  | T  | LF | LN | M  | F  | Y  | G | K | L | K | G | M | P | P | K | L |   |   |   |
| tr A0A1V3ITW9 A0A1V3ITW9_9PAST | . . . . . | E. GKT | T. CS | LS | SRL | RRG | I | LY | . RT | A    | TEL  | G    | A  | T   | KI | AL | G  | H  | R  | DD | I  | E  | T  | LF | LN | M  | F  | Y  | G | K | L | K | G | M | P | P | K | L |   |   |   |
| tr A0A1E5BFJ6 A0A1E5BFJ6_9VIBR | . . . . . | E. GKT | T. CS | LS | SRL | RRG | I | LY | . RT | A    | KEL  | G    | A  | T   | KI | AL | G  | H  | R  | DD | I  | E  | T  | LF | LN | M  | F  | Y  | G | K | L | K | G | M | P | P | K | L |   |   |   |
| tr A0A1J5KWL8 A0A1J5KWL8_9VIBR | . . . . . | E. GKT | T. CS | LS | SRL | RRG | I | LY | . RT | A    | KEL  | G    | A  | T   | KI | AL | G  | H  | R  | DD | I  | E  | T  | LF | LN | M  | F  | Y  | G | K | L | K | G | M | P | P | K | L |   |   |   |
| tr A0A2S0UY9 A0A2S0UY9_9GAMM   | . . . . . | E. GKT | T. CS | LS | SRL | RRG | I | LY | . KA | A    | KAL  | G    | A  | T   | KI | AL | G  | H  | R  | DD | M  | V  | E  | T  | LF | LN | M  | F  | Y | G | K | L | K | G | M | P | P | K | L |   |   |
| tr A0A2T3I6F0 A0A2T3I6F0_9GAMM | . . . . . | E. GKT | T. CS | LS | SRL | RRG | I | LY | . RT | A    | KEL  | G    | A  | T   | KI | AL | G  | H  | R  | DD | M  | L  | E  | T  | LF | LN | M  | F  | Y | G | K | L | K | G | M | P | P | K | L |   |   |
| tr A0A1V3I034 A0A1V3I034_9GAMM | . . . . . | E. GKT | T. CS | LS | SRL | RRG | I | LY | . RT | A    | KEL  | G    | A  | T   | KI | AL | G  | H  | R  | DD | I  | E  | T  | LF | LN | M  | F  | Y  | G | K | L | K | G | M | P | P | K | L |   |   |   |
| sp A1SWS4 TTCA_PSYIN           | . . . . . | E. GKT | T. CS | LS | SRL | RRG | I | LY | . RT | A    | KEL  | G    | A  | T   | KI | AL | G  | H  | R  | DD | I  | L  | A  | T  | LF | LN | M  | F  | Y | G | K | L | K | G | M | P | P | K | L |   |   |
| tr A0A066RUR5 A0A066RUR5_9GAMM | . . . . . | E. GKT | T. CS | LS | SRL | RRG | I | LY | . RT | A    | KEL  | G    | A  | T   | KI | AL | G  | H  | R  | DD | M  | L  | E  | T  | LF | LN | M  | F  | Y | G | K | L | K | G | M | P | P | K | L |   |   |
| tr A0A090IGU5 A0A090IGU5_9GAMM | . . . . . | E. GKT | T. CS | LS | SRL | RRG | I | LY | . NA | A    | VEL  | R    | A  | T   | KI | AL | G  | H  | R  | DD | I  | V  | E  | T  | LF | LN | M  | F  | Y | G | A | K | M | K | T | M | P | P | K | L |   |
| tr A0A2N1A2J9 A0A2N1A2J9_9GAMM | . . . . . | E. GKT | T. CS | LS | SRL | RRG | I | LY | . RT | A    | KEL  | G    | A  | T   | KI | AL | G  | H  | R  | DD | M  | L  | A  | T  | LF | LN | M  | F  | Y | G | K | L | K | G | M | P | P | K | L |   |   |
| tr M4U6L5 M4U6L5_9GAMM         | . . . . . | E. GKT | T. CS | LS | SRL | RRG | I | LY | . RT | A    | KEV  | G    | A  | T   | KI | AL | G  | H  | R  | DD | M  | L  | A  | T  | LF | LN | M  | F  | Y | G | K | L | K | G | M | P | P | K | L |   |   |
| tr A0A2T4IDK9 A0A2T4IDK9_9RHO  | . . . . . | A. GKT | T. CS | LS | SRL | RRG | I | Y  | . RV | A    | E    | I    | G  | A   | T  | R  | I  | AL | G  | H  | R  | DD | M  | L  | E  | T  | LF | LN | M | F | Y | G | K | L | K | G | M | P | P | K | L |
| tr A0A290ZQX4 A0A290ZQX4_9RHO  | . . . . . | E. GKT | T. CS | LS | SRL | RRG | I | Y  | . RT | A    | TEV  | G    | A  | T   | R  | I  | AL | G  | H  | R  | DD | M  | L  | E  | T  | LF | LN | M  | F | Y | G | K | L | K | G | M | P | P | K | L |   |
| sp A1K2P7 TTCA_AZOSB           | . . . . . | E. GKT | T. CS | LS | SRL | RRG | I | Y  | . RT | A    | E    | I    | G  | A   | T  | R  | I  | AL | G  | H  | R  | DD | M  | L  | E  | T  | LF | LN | M | F | Y | G | K | L | K | G | M | P | P | K | L |
| tr A0A1E5C9L7 A0A1E5C9L7_9GAMM | . . . . . | E. GKT | T. CS | LS | SRL | RRG | I | LY | . RT | A    | KEL  | G    | A  | T   | KI | AL | G  | H  | R  | DD | I  | E  | T  | LF | LN | M  | F  | Y  | G | K | L | K | G | M | P | P | K | L |   |   |   |
| tr D0TAC9 D0TAC9_GRIHO         | . . . . . | E. GKT | T. CS | LS | SRL | RRG | I | LY | . RT | A    | KEL  | G    | A  | T   | KI | AL | G  | H  | R  | DD | M  | L  | E  | T  | LF | LN | M  | F  | Y | G | K | L | K | G | M | P | P | K | L |   |   |
| tr A0A2X1V8W5 A0A2X1V8W5_MORMO | . . . . . | E. GKT | T. CS | LS | SRL | RRG | I | LY | . RT | A    | TEL  | G    | A  | T   | KI | AL | G  | H  | R  | DD | I  | L  | Q  | T  | LF | LN | M  | F  | Y | G | K | L | K | G | M | P | P | K | L |   |   |
| tr V5FDB5 V5FDB5_9VIBR         | . . . . . | E. GKT | T. CS | LS | SRL | RRG | I | LY | . RT | A    | NEL  | G    | A  | T   | KI | AL | G  | H  | R  | DD | I  | E  | T  | LF | LN | M  | F  | Y  | G | K | L | K | G | M | P | P | K | L |   |   |   |
| tr A0A2N7DID8 A0A2N7DID8_9VIBR | . . . . . | P. GKT | T. CS | LS | SRL | RRG | I | LY | . RT | A    | E    | I    | G  | A   | T  | KI | AL | G  | H  | R  | DD | I  | E  | T  | LF | LN | M  | F  | Y | G | K | L | K | G | M | P | P | K | L |   |   |
| tr A0A1Z9YRK8 A0A1Z9YRK8_9ALTE | . . . . . | E. GKT | T. CS | LS | SRL | RRG | I | LY | . RT | A    | TEL  | G    | A  | T   | KI | AL | G  | H  | R  | DD | M  | L  | E  | T  | LF | LN | M  | F  | Y | G | K | L | K | G | M | P | P | K | L |   |   |
| tr A0A1H3QM02 A0A1H3QM02_9PROT | . . . . . | E. GKT | T. CS | LS | SRL | RRG | I | Y  | . RV | A    | TEL  | G    | A  | T   | KI | AL | G  | H  | R  | DD | I  | E  | T  | LF | LN | M  | F  | Y  | G | K | L | K | G | M | P | P | K | L |   |   |   |
| tr A0A1H7TXX2 A0A1H7TXX2_9PAST | . . . . . | E. GKT | T. CS | LS | SRL | RRG | I | LY | . RT | A    | TEL  | G    | A  | T   | KI | AL | G  | H  | R  | DD | M  | L  | E  | T  | LF | LN | M  | F  | Y | G | K | L | K | G | M | P | P | K | L |   |   |
| tr C0B433 C0B433_9GAMM         | . . . . . | E. GKT | T. CS | LS | SRL | RRG | I | LY | . RT | A    | TEL  | G    | A  | T   | KI | AL | G  | H  | R  | DD | I  | E  | T  | LF | LN | M  | F  | Y  | G | K | L | K | G | M | P | P | K | L |   |   |   |
| tr A0A1V3K8E7 A0A1V3K8E7_9PAST | . . . . . | E. GKT | T. CS | LS | SRL | RRG | I | LY | . RT | A    | TEL  | G    | A  | T   | KI | AL | G  | H  | R  | DD | M  | L  | E  | T  | LF | LN | M  | F  | Y | G | K | L | K | G | M | P | P | K | L |   |   |
| tr A0A0M0M226 A0A0M0M226_9GAMM | . . . . . | E. GKT | T. CS | LS | SRL | RRG | I | LY | . RT | A    | KEL  | G    | A  | T   | KI | AL | G  | H  | R  | DD | M  | I  | E  | T  | LF | LN | M  | F  | Y | G | K | L | K | G | M | P | P | K | L |   |   |
| tr A0A0G3CN87 A0A0G3CN87_9GAMM | . . . . . | E. GKT | T. CS | LS | SRL | RRG | I | LY | . RT | A    | SEL  | G    | A  | T   | KI | AL | G  | H  | R  | DD | I  | L  | Q  | T  | LF | LN | M  | F  | Y | G | K | L | K | G | M | P | P | K | L |   |   |
| tr A0A085HJV6 A0A085HJV6_9GAMM | . . . . . | E. GKT | T. CS | LS | SRL | RRG | I | LY | . RT | A    | TEL  | G    | A  | T   | KI | AL | G  | H  | R  | DD | M  | L  | E  | T  | LF | LN | M  | F  | Y | G | K | L | K | G | M | P | P | K | L |   |   |
| tr S9ZRS6 S9ZRS6_9RHO          | . . . . . | A. GKT | T. CS | LS | SRL | RRG | I | Y  | . RA | A    | E    | I    | G  | A   | S  | R  | I  | AL | G  | H  | R  | DD | M  | L  | E  | T  | LF | LN | M | F | Y | G | K | L | K | G | M | P | P | K | L |
| tr A0A1Y0CWR3 A0A1Y0CWR3_9GAMM | . . . . . | A. GKT | T. CA | LS | SRL | RR  | A | I  | LY   | . RT | A    | A    | E  | I   | G  | A  | T  | KI | AL | G  | H  | R  | DD | I  | E  | T  | LF | LN | M | F | Y | G | K | L | K | G | M | P | P | K | L |
| sp Q7N3Y7 TTCA_PHOLL           | . . . . . | E. GKT | T. CS | LS | SRL | RRG | I | LY | . RT | A    | TEL  | G    | A  | T   | KI | AL | G  | H  | R  | DD | I  | L  | Q  | T  | LF | LN | M  | F  | Y | G | K | L | K | G | M | P | P | K | L |   |   |
| tr A0A2S7JNG9 A0A2S7JNG9_9BURK | . . . . . | E. GKT | M. CS | LS | SRL | RRG | I | LY | . RV | A    | GEL  | G    | C  | N   | KI | AL | G  | H  | R  | DD | I  | L  | Q  | T  | LF | LN | M  | F  | Y | G | K | L | K | G | M | P | P | K | L |   |   |
| tr A0A2M6V2D8 A0A2M6V2D8_9BURK | . . . . . | E. GKT | M. CS | LS | SRL | RRG | I | LY | . RV | A    | GEL  | G    | C  | N   | KI | AL | G  | H  | R  | DD | I  | L  | Q  | T  | LF | LN | M  | F  | Y | G | K | L | K | G | M | P | P | K | L |   |   |
| tr A0A2G1BBN6 A0A2G1BBN6_9GAMM | . . . . . | E. GKT | T. CS | LS | SRL | RRG | I | LY | . RT | A    | NEL  | G    | A  | T   | KI | AL | G  | H  | R  | DD | M  | I  | E  | T  | LF | LN | M  | F  | Y | G | K | L | K | G | M | P | P | K | L |   |   |
| tr A0A1D2U9X7 A0A1D2U9X7_9BURK | . . . . . | E. GKT | T. CS | V  | S   | R   | L | RR | A    | I    | LY   | . RV | A  | TEL | G  | A  | T  | KI | AL | G  | H  | R  | DD | I  | V  | T  | LF | LN | M | F | Y | G | K | L | K | G | M | P | P | K | L |
| tr A0A081NFN6 A0A081NFN6_9GAMM | . . . . . | E. GKT | T. CA | LS | SRL | RRG | I | LY | . RT | A    | TEL  | K    | A  | T   | KI | AL | G  | H  | R  | DD | I  | E  | T  | LF | LN | M  | F  | Y  | G | K | L | K | G | M | P | P | K | L |   |   |   |
| tr A0A235CJ05 A0A235CJ05_9GAMM | . . . . . | E. GKT | T. CS | LS | SRL | RRG | I | LY | . RT | A    | TEL  | G    | A  | T   | KI | AL | G  | H  | R  | DD | I  | E  | T  | LF | LN | M  | F  | Y  | G | K | L | K | G | M | P | P | K | L |   |   |   |
| tr A0A2S0IK97 A0A2S0IK97_9GAMM | . . . . . | E. GKT | T. CS | LS | SRL | RRG | I | LY | . K  | T    | AKRL | G    | A  | T   | KI | AL | G  | H  | R  | DD | M  | I  | E  | T  | LF | LN | M  | F  | Y | G | K | L | K | G | M | P | P | K | L |   |   |
| tr A0A1G7NVH8 A0A1G7NVH8_9GAMM | . . . . . | E. GKT | T. CS | LS | SRL | RRG | I | LY | . RT | A    | KEL  | K    | A  | T   | KI | AL | G  | H  | R  | DD | M  | I  | E  | T  | LF | LN | M  | F  | Y | G | K | L | K | G | M | P | P | K | L |   |   |
| tr A0A2S0R041 A0A2S0R041_9RHO  | . . . . . | A. GKT | T. CS | LS | SRL | RRG | I | Y  | . RV | A    | E    | I    | G  | A   | T  | KI | AL | G  | H  | R  | DD | M  | L  | E  | T  | LF | LN | M  | F | Y | G | K | L | K | G | M | P | P | K | L |   |
| tr K8X231 K8X231_9GAMM         | . . . . . | E. GKT | T. CS | LS | SRL | RRG | I | LY | . RT | A    | TEL  | G    | A  | T   | KI | AL | G  | H  | R  | DD | I  | L  | Q  | T  | LF | LN | M  | F  | Y | G | K | L | K | G | M | P | P | K | L |   |   |
| tr L8D9A5 L8D9A5_9GAMM         | . . . . . | E. GKT | T. CS | LS | SRL | RRG | I | LY | . RT | A    | KEM  | G    | A  | T   | KI | AL | G  | H  | R  | DD | I  | E  | T  | LF | LN | M  | F  | Y  | G | K | L | K | G | M | P | P | K | L |   |   |   |
| tr A0A0N0Z7B8 A0A0N0Z7B8_9GAMM | . . . . . | E. GKT | T. CS | LS | SRL | RRG | I | LY | . RT | A    | TEL  | G    | A  | T   | KI | AL | G  | H  | R  | DD | I  | L  | Q  | T  | LF | LN | M  | F  | Y | G | K | L | K | G | M | P | P | K | L |   |   |
| tr A0A136A1P4 A0A136A1P4_9ALTE | . . . . . | E. GKT | T. CS | LS | SRL | RR  | A | I  | LY   | . RT | A    | TEL  | G  | A   | T  | KI | AL | G  | H  | R  | DD | M  | L  | E  | T  | LF | LN | M  | F | Y | G | K | L | K | G | M | P | P | K | L |   |
| tr A0A2L0PJ66 A0A2L0PJ66_VITS1 | . . . . . | E. GKT | T. CA | LS | SRL | RRG | I | LY | . RV | A    | KEL  | G    | C  | T   | KI | AL | G  | H  | R  | DD | I  | E  | T  | LF | LN | M  | F  | Y  | G | K | L | K | G | M | P | P | K | L |   |   |   |
| tr A0A2D5T2E5 A0A2D5T2E5_PSEAS | . . . . . | E. GKT | T. CS | LS | SRL | RRG | I | LY | . RT | A    | KEM  | G    |    |     |    |    |    |    |    |    |    |    |    |    |    |    |    |    |   |   |   |   |   |   |   |   |   |   |   |   |   |



|                                |           |    |    |    |            |     |      |       |             |            |        |      |      |      |     |      |     |     |
|--------------------------------|-----------|----|----|----|------------|-----|------|-------|-------------|------------|--------|------|------|------|-----|------|-----|-----|
| tr A0A257D8X1 A0A257D8X1_9BURK | . . . . . | E. | GK | TT | CGLCSRLRRG | ILY | .RV  | AGEL  | GATKIALGHH  | DDIVQ      | TLF    | MNMF | FGSK | MKG  | MP  | PKL  |     |     |
| tr A0A2S5T0L8 A0A2S5T0L8_9BURK | . . . . . | E. | GK | TM | CSLCSRLRRG | VLY | .RV  | ASEL  | GATKIALGHH  | DDMLQ      | TLF    | LNMF | FGSK | LKG  | MP  | PKL  |     |     |
| tr A0A0G3EQ23 A0A0G3EQ23_9BURK | . . . . . | E. | GK | TT | CSLCSRLRRG | ILY | .RV  | AGEL  | GATKIALGHH  | DDILET     | TLF    | LNMF | FGSK | FKG  | MP  | PKL  |     |     |
| tr A0A2N2TCB9 A0A2N2TCB9_9PROT | . . . . . | E. | GK | TL | CSLCSRLRRG | ILY | .RV  | AGEL  | GATKIALGHH  | DDILT      | TL     | LNMF | FGAK | LKG  | MP  | AKL  |     |     |
| tr A0A0Q4NX11 A0A0Q4NX11_9BURK | . . . . . | E. | GK | TT | CSLCSRLRRG | ILY | .RV  | ADEL  | GATKIALGHH  | DDILET     | TLF    | LNMF | FGSK | LKG  | MP  | AKL  |     |     |
| tr IOHLE1 IOHLE1_RUBGI         | . . . . . | E. | GK | TM | CSLCSRLRRG | VLY | .RV  | ASEI  | GATKIALGHH  | DDMVV      | TL     | MNMF | FGSR | MKG  | MP  | PKL  |     |     |
| tr A0A0C2BG76 A0A0C2BG76_9BURK | . . . . . | E. | GK | TT | CSLCSRLRRG | ILY | .RV  | ADEL  | GATKIALGHH  | DDILET     | TLF    | LNMF | FGAK | VKG  | MP  | PKL  |     |     |
| tr A0A085FQK3 A0A085FQK3_9BURK | . . . . . | E. | GK | TT | CSLCSRLRRG | ILY | .RV  | ADEL  | GNKIALGHH   | DDILET     | TLF    | LNMF | FGSK | LKG  | MP  | AKL  |     |     |
| tr A0A0R0MBG2 A0A0R0MBG2_9BURK | . . . . . | E. | GK | TM | CSLCSRLRRG | ILY | .SV  | ARQLK | GNKIALGHH   | DDMLQ      | TLF    | LNMF | FGSK | LKG  | MP  | PKL  |     |     |
| tr A0A2P5K8F8 A0A2P5K8F8_9BURK | . . . . . | E. | GK | TT | CSLCSRLRRG | ILY | .RV  | AGEL  | GATKIALGHH  | DDILT      | QTL    | VL   | LNMF | FGSK | LKG | MP   | PKL |     |
| tr A0A0Q6LK70 A0A0Q6LK70_9BURK | . . . . . | E. | GK | TM | CSLCSRLRRG | ILY | .RV  | AGEL  | GATKVALGHH  | DDMLQ      | TLF    | MNMF | FGSR | LKG  | MP  | PKL  |     |     |
| tr A0A1Y2Q832 A0A1Y2Q832_9BURK | . . . . . | E. | GK | TL | CSLCSRLRRG | ILY | .RV  | ADEL  | GNRIALGHH   | DDILT      | QTL    | TL   | LNMF | FGAK | LKG | MP   | PKL |     |
| tr A0A0L6TAQ8 A0A0L6TAQ8_9BURK | . . . . . | E. | GK | TM | CSLCSRLRRG | ILY | .RV  | ASEL  | GATKIALGHH  | DDMLQ      | TLF    | MNMF | FGSK | MKG  | MP  | PKL  |     |     |
| tr A0A2U1DUA6 A0A2U1DUA6_9BURK | . . . . . | E. | GK | TM | CSLCSRLRRG | ILY | .RV  | ADEL  | GCTKIALGHH  | DDMLQ      | TLF    | LNMF | FGSK | LKG  | MP  | PKV  |     |     |
| tr A0A1Y0ES54 A0A1Y0ES54_9BURK | . . . . . | E. | GK | TM | CSLCSRLRRG | ILY | .TV  | ARRL  | GNKIALGHH   | DDMLQ      | TLF    | LNMF | FGSK | LKG  | MP  | PKL  |     |     |
| tr A0A060NJB1 A0A060NJB1_9BURK | . . . . . | E. | GK | TL | CSLCSRLRRG | ILY | .RV  | ADEL  | GNKIALGHH   | DDILT      | QTL    | TL   | LNMF | FGAK | LKG | MP   | AKL |     |
| tr A0A2M8EE54 A0A2M8EE54_9BURK | . . . . . | E. | GK | TM | CSLCSRLRRG | ILY | .RV  | ADEL  | KITKIALGHH  | DDMLH      | TLF    | LNMF | FGAK | LKG  | MP  | PKL  |     |     |
| tr A0A221KEA4 A0A221KEA4_VITFI | . . . . . | E. | GK | TM | CSLCSRLRRG | ILY | .RV  | ADEL  | GCTKIALGHH  | DDMVV      | TL     | MNMF | FGSR | MKG  | MP  | PKL  |     |     |
| tr A0A1S8FRQ0 A0A1S8FRQ0_9BURK | . . . . . | E. | GK | TT | CSLCSRLRRG | ILY | .RV  | ADEL  | GATKIALGHH  | DDILT      | QTL    | TL   | LNMF | FGSK | MKS | MP   | PKL |     |
| tr A0A0Q4GYK6 A0A0Q4GYK6_9BURK | . . . . . | E. | GK | TT | CGLCSRLRRG | ILY | .RV  | ADEL  | GATKVALGHH  | DDMLQ      | TLF    | LNMF | FGSK | LKS  | MP  | PKL  |     |     |
| tr A0A016XGF4 A0A016XGF4_9BURK | . . . . . | E. | GK | TM | CSLCSRLRRG | ILY | .RV  | ADEL  | KNKIALGHH   | DDMLQ      | TLF    | LNMF | FGSK | LKG  | MP  | PKL  |     |     |
| tr A0A2W5QR70 A0A2W5QR70_VARPD | . . . . . | E. | GK | TT | CGLCSRLRRG | ILY | .RV  | ADEL  | GATKVALGHH  | DDMLQ      | TLF    | LNMF | FGAA | LKS  | MP  | PKL  |     |     |
| tr A0A258NZQ2 A0A258NZQ2_9BURK | . . . . . | E. | GK | TM | CSLCSRLRRG | ILY | .RV  | ADEL  | GATKIALGHH  | DDMLQ      | TLF    | LNMF | FGAS | RKG  | MP  | PKL  |     |     |
| tr A0A2R4F9B5 A0A2R4F9B5_9BURK | . . . . . | E. | GK | TT | CGLCSRLRRG | ILY | .RV  | ADEL  | GCTKIALGHH  | DDILT      | QTL    | TL   | LNMF | FGSK | MKA | MP   | PKL |     |
| tr A0A1Q3R2G4 A0A1Q3R2G4_9BURK | . . . . . | E. | GK | TT | CSLCSRLRRG | ILY | .SV  | ARRL  | KNKIALGHH   | DDMLQ      | TLF    | LNMF | FGSK | LKG  | MP  | PKL  |     |     |
| tr A0A0Q8T160 A0A0Q8T160_9BURK | . . . . . | E. | GK | TM | CSLCSRLRRG | ILY | .RV  | ADEL  | GCTKIALGHH  | DDMLQ      | TLF    | LNMF | FGSK | LKG  | MP  | PKV  |     |     |
| tr A0A2N2RMC2 A0A2N2RMC2_9PROT | . . . . . | P. | GK | TM | CSLCSRLRRG | ILY | .RV  | ADEL  | GATKIALGHH  | DDMLQ      | TLF    | LNMF | FGSK | LKG  | MP  | PKL  |     |     |
| tr A0A2S5SVE7 A0A2S5SVE7_9BURK | . . . . . | E. | GK | TT | CSLCSRLRRG | ILY | .RV  | AGEL  | GATKIALGHH  | DDMLQ      | TLF    | LNMF | FGSK | LKG  | MP  | PKL  |     |     |
| tr A0A1H9S6W8 A0A1H9S6W8_9BURK | . . . . . | E. | GK | TM | CSLCSRLRRG | ILY | .RL  | ADEL  | GCRKIALGHH  | DDMLQ      | TLF    | LNMF | FGSK | LKG  | MP  | PKV  |     |     |
| tr A0A1Q8YG82 A0A1Q8YG82_9BURK | . . . . . | E. | GK | TM | CSLCSRLRRG | ILY | .RV  | ADEL  | KITKIALGHH  | DDMLH      | TLF    | LNMF | FGAK | LKG  | MP  | PKL  |     |     |
| tr A0A0K1NE84 A0A0K1NE84_9BURK | . . . . . | E. | GK | TT | CSLCSRLRRG | ILY | .SV  | ARRL  | GNKIALGHH   | DDMLQ      | TLF    | LNMF | FGSK | LKG  | MP  | PKL  |     |     |
| tr A0A2E2K941 A0A2E2K941_9GAMM | . . . . . | E. | GK | TT | CGLCSRLRRG | TLY | .GFA | EQI   | GANKIALGHH  | DDMVQ      | TLF    | LNMF | FGSR | MAA  | MP  | PKL  |     |     |
| tr S6HH18 S6HH18_9GAMM         | . . . . . | E. | GK | KT | CGLCSRLRRG | TLY | .SFA | EDI   | GNKIALGHH   | DDIET      | TLF    | LNMF | FGNR | LAM  | MP  | PKL  |     |     |
| tr S6GEA2 S6GEA2_9GAMM         | . . . . . | E. | GK | KT | CGLCSRLRRG | TLY | .AF  | AEE   | INANKIALGHH | DDIET      | TLF    | LNMF | FGNR | LAM  | MP  | PKL  |     |     |
| tr A0A2G6L769 A0A2G6L769_9GAMM | . . . . . | D. | GK | TM | CGLCSRLRRG | TLY | .SFA | EED   | DANKIALGHH  | DDIVET     | TLF    | LNMF | FGSR | LAS  | MP  | PKL  |     |     |
| tr A0A1Y5D7E5 A0A1Y5D7E5_9GAMM | . . . . . | E. | GK | TT | CGLCSRLRRG | TLY | .AF  | AED   | I           | GANKIALGHH | DDIVQ  | TMF  | LNMF | FGAR | LAS | MP   | PKL |     |
| tr A0A162JZM0 A0A162JZM0_9GAMM | . . . . . | E. | GK | TT | CGLCSRLRRG | TLY | .SFA | EDI   | KATKIALGHH  | DDIVET     | TLF    | LNMF | FGHS | KAS  | MP  | PKL  |     |     |
| tr I2JK26 I2JK26_9GAMM         | . . . . . | E. | GK | TT | CGLCSRLRRG | TLY | .AF  | AEE   | I           | GATKIALGHH | DDIVQ  | TLF  | LNMF | FGSR | LSG | MP   | PKL |     |
| tr A0A1T4LA54 A0A1T4LA54_9GAMM | . . . . . | E. | GK | TT | CALCSRLRRG | SLY | .GFA | EED   | I           | GATKIALGHH | DDIMET | TLF  | LNMF | FGT  | LKS | MP   | PKL |     |
| tr A0A2P6AQM6 A0A2P6AQM6_9GAMM | . . . . . | E. | GK | TY | CAVCSRLRRG | NLY | .AF  | AQEI  | GATKVALGHH  | DDIMAT     | TLF    | LNLF | FGH  | AK   | MP  | PKL  |     |     |
| tr A0A2D6C0C1 A0A2D6C0C1_9PROT | . . . . . | A. | GK | VA | CSLCSRLRRG | VLY | .RT  | ADEL  | GATKIALGHH  | DDMVET     | TLF    | LNLF | FGH  | SAR  | LKG | MP   | PKL |     |
| tr A0A2E6MC67 A0A2E6MC67_9GAMM | . . . . . | E. | GK | TT | CPVCSRLRRG | ILY | .SHA | QKI   | GATKIALGHH  | DDVVET     | LM     | LNMF | FGAK | LKA  | MP  | AKL  |     |     |
| tr A0A0Q9YQ77 A0A0Q9YQ77_9COXI | . . . . . | E. | NH | TY | CSLCSRLRRG | NLY | .RY  | AKE   | HF          | GNKIALGHH  | DDILI  | HS   | LMG  | FI   | YNG | EVRS | MP  | PKL |
| tr R4YM77 R4YM77_OLEAN         | . . . . . | E. | GK | TT | CSLCSRLRRG | SLY | .GY  | AESI  | GANKIALGHH  | DDIVET     | TLF    | LNMF | FGAK | LKS  | MP  | PKL  |     |     |
| tr A0A2D8IV68 A0A2D8IV68_9GAMM | . . . . . | E. | GK | TT | CGICSLRRRG | SLY | .GFA | EED   | I           | GATKIALGHH | DDIVET | TLF  | LNMF | FGT  | LKA | MP   | PKL |     |
| tr A0A0M3BW87 A0A0M3BW87_ACIP1 | . . . . . | E. | GK | TY | CAVCSRLRRG | SLY | .GFA | AQEI  | GATKVALGHH  | DDIIAT     | TLF    | LNLF | FGH  | G    | LKA | MP   | PKL |     |
| tr A0A25SGDH7 A0A25SGDH7_9GAMM | . . . . . | E. | GK | TY | CSLCSRLRRG | TLY | .GFA | QOI   | GATKIALGHH  | DDIET      | TLF    | LNMF | FGSK | LKS  | MP  | PKL  |     |     |
| tr A0A2R4IZ02 A0A2R4IZ02_9GAMM | . . . . . | E. | GK | TT | CGLCSRLRRG | SLY | .GFA | EED   | I           | GATKIALGHH | DDILET | TLF  | LNMF | FGSK | LKT | MP   | PKL |     |
| tr Q1N675 Q1N675_9GAMM         | . . . . . | E. | GK | TT | CGLCSRLRRG | TLY | .GFA | EED   | I           | GANKVALGHH | DDIVET | TMF  | LNMF | FGAR | LAM | MP   | PKL |     |
| tr A0A2V1MRG8 A0A2V1MRG8_9GAMM | . . . . . | E. | GK | TT | CSLCSRLRRG | TLY | .GFA | QRI   | GATKIALGHH  | DDIET      | TLF    | LNMF | FGSK | MKA  | MP  | PKL  |     |     |
| tr A0A2G6JPB4 A0A2G6JPB4_NEPCE | . . . . . | E. | GK | TT | CALCSRLRRG | SLY | .GFA | EED   | I           | GANKIALGHH | DDILET | TLF  | LNMF | FGSK | MKS | MP   | PKL |     |
| tr A0A1D8RZY8 A0A1D8RZY8_9GAMM | . . . . . | E. | GK | TT | CSLCSRLRRG | ILY | .KV  | AAB   | I           | GATKIALGHH | DDMVET | LM   | LNMF | FGSK | LKS | MP   | AKL |     |
| tr A0A2S6H7K9 A0A2S6H7K9_9GAMM | . . . . . | E. | GK | NT | CGLCSRLRRG | TLY | .GY  | AANNV | TKIALGHH    | DDILET     | TLF    | LNFI | FG   | G    | LKA | MP   | PKL |     |
| tr A0A1Y6EY14 A0A1Y6EY14_9GAMM | . . . . . | E. | GK | TT | CALCSRLRRG | ILY | .SHA | QKI   | GATKIALGHH  | DDIMET     | TLF    | LNMF | FGSK | LKS  | MP  | PKL  |     |     |
| tr A0A1G9S8A4 A0A1G9S8A4_9BURK | . . . . . | E. | GK | TT | CSLCSRLRRG | ILY | .RV  | ADEL  | GATKIALGHH  | DDIVAT     | TL     | LNLF | FG   | G    | MKA | MP   | PKL |     |
| tr A0A2T5IWQ3 A0A2T5IWQ3_9LACT | . . . . . | E. | GK | TY | CAVCSRLRRG | SLY | .GFA | KEI   | GATKVALGHH  | DDIMAT     | TLF    | LNLF | FGH  | G    | LKA | MP   | PKL |     |
| tr A0A0Q6BL24 A0A0Q6BL24_9PROT | . . . . . | E. | GK | TT | CSLCSRLRRG | ILY | .TT  | AQQL  | GATKIALGHH  | DDIVQ      | TLF    | LNMF | FGAK | MKA  | MP  | PKL  |     |     |
| tr A0A1M4ZGN9 A0A1M4ZGN9_9GAMM | . . . . . | E. | GK | TL | CSLCSRLRRG | ALY | .SFA | ARE   | FTKIALGHH   | DDIVAT     | TLF    | LNLF | FGH  | AK   | LSG | MP   | PKL |     |
| tr A0A1G6A7Y4 A0A1G6A7Y4_9GAMM | . . . . . | A. | GK | TT | CSLCSRLRRG | ILY | .RV  | ASEL  | GATKIALGHH  | DDILLET    | LM     | LNMF | FGSK | MKS  | MP  | PKL  |     |     |
| tr A0A1H2UJU7 A0A1H2UJU7_9ALTE | . . . . . | E. | GK | TT | CGLCSRLRRG | ILY | .NF  | AEEH  | VTKIALGHH   | DDILET     | TLF    | LNMF | FGSK | LKT  | MP  | PVL  |     |     |
| tr A0A255QCR2 A0A255QCR2_9BURK | . . . . . | E. | GK | TT | CSLCSRLRRG | ILY | .KV  | ADEL  | KNKIALGHH   | DDIVAT     | LM     | LNMF | FGSR | MKA  | MP  | PKL  |     |     |
| tr A0A1I7GPK9 A0A1I7GPK9_9BURK | . . . . . | E. | GK | TT | CGLCSRLRRG | ILY | .RV  | ADEL  | GATKIALGHH  | DDIVQ      | TL     | LNMF | FGSR | MKA  | MP  | PKL  |     |     |
| tr A0A2E3CTL6 A0A2E3CTL6_9GAMM | . . . . . | E. | GK | TT | CGLCSRLRRG | TLY | .SFA | EED   | I           | GATKIALGHH | DDIVET | TLF  | LNMF | FGSR | LSG | MP   | PKL |     |
| tr A0A2G2GZK4 A0A2G2GZK4_9GAMM | . . . . . | E. | GK | TT | CSLCSRLRRG | ILY | .RV  | ADEL  | GATKIALGHH  | DDIMLET    | LM     | LNMF | FGSK | MKS  | MP  | PKL  |     |     |
| tr D4ZKD3 D4ZKD3_SHEVD         | . . . . . | E. | GK | KT | CSLCSRLRRG | TLY | .GFA | QOI   | GATKIALGHH  | DDIET      | TMF    | LNMF | FGAK | QKA  | MP  | PKL  |     |     |
| tr A0A2E4Z906 A0A2E4Z906_9GAMM | . . . . . | A. | GK | TT | CSLCSRLRRG | ILY | .RV  | ADEL  | GATKIALGHH  | DDMVET     | LM     | LNMF | FGSK | MKS  | MP  | AKL  |     |     |
| tr A0A2E2XIK0 A0A2E2XIK0_9GAMM | . . . . . | E. | GK | KT | CGLCSRLRRG | TLY | .AF  | AEKI  | GATKIALGHH  | DDIVET     | TLF    | LNMF | FGSR | LKA  | MP  | PKL  |     |     |
| tr A0A160N2I8 A0A160N2I8_9GAMM | . . . . . | A. | GK | TM | CSLCSRLRRG | ALY | .SFA | AEN   | ITKIALGHH   | DDIIAT     | TLF    | LNLF | FGH  | AK   | LKA | MP   | PKL |     |
| tr A0A1E4L069 A0A1E4L069_9GAMM | . . . . . | E. | GK | TM | CSLCSRLRRG | ALY | .TY  | AEEQ  | FTKIALGHH   | DDLLAT     | TLF    | MNLF | FGH  | AK   | LSG | MP   | PKL |     |
| tr A0A2T4D6Z5 A0A2T4D6Z5_9GAMM | . . . . . | E. | GK | TT | CSLCSRLRRG | ILY | .RV  | ANEL  | GATKIALGHH  | DDIMLET    | TL     | LNMF | FGT  | MKS  | MP  | PKL  |     |     |
| tr A0A085U7Q6 A0A085U7Q6_YERRU | . . . . . | A. | GK | TT | CGLCSRLRRG | TLY | .SFA | EKI   | GATKIALGHH  | DDIVET     | TLF    | LNFI | FGH  | AK   | LKA | MP   | PKL |     |
| sp Q47ZU5 TTCA_COLP3           | . . . . . | E. | GK | TT | CSLCSRLRRG | ALY | .KAA | KKI   | GATKIALGHH  | DDIMET     | TL     | LNMF | FGSK | MKA  | MP  | AKL  |     |     |
| tr A0A1IOAQ21 A0A1IOAQ21_9PROT | . . . . . | E. | GK | TT | CSLCSRLRRG | VLY | .RV  | AGEL  | GATKIALGHH  | DDILET     | TLF    | LNLF | FGH  | G    | LKT | MP   | PKL |     |
| tr A0A1H4G6R6 A0A1H4G6R6_9BURK | . . . . . | E. | GK | TT | CSLCSRLRRG | VLY | .RT  | ADEL  | GANKIALGHH  | DDIVET     | TLF    | LNLF | FGG  | MKA  | MP  | PKL  |     |     |
| tr A0A2K9LR78 A0A2K9LR78_9GAMM | . . . . . | E. | GK | TT | CGLCSRLRRG | TLY | .TFA | EDI   | KATKIALGHH  | DDIVET     | TMF    | LNMF | FGSR | LAS  | MP  | PKL  |     |     |
| tr A0A2M7LUW5 A0A2M7LUW5_9GAMM | . . . . . | E. | GK | TT | CGLCSRLRRG | TLY | .GFA | QHI   | GATKIALGHH  | DDIET      | TLF    | LNMF | FGAK | QKA  | MP  | PKL  |     |     |
| tr A0A246KYX3 A0A246KYX3_9GAMM | . . . . . | E. | GK | TM | CSLCSRLRRG | ALY | .HY  | AETH  | FTKIALGHH   | DDRVAT     | TLF    | MNLF | FGH  | AK   | LAS | MP   | PKL |     |
| tr A0A2D8RAF4 A0A2D8RAF4_9GAMM | . . . . . | E. | GK | TT | CGLCSRLRRG | ILY | .NF  | AQEN  | GNKIALGHH   | DDILET     | TLF    | LNMF | FGAK | LAS  | MP  | PKL  |     |     |
| tr A0A0R0DYI3 A0A0R0DYI3_9GAMM | . . . . . | E. | GK | TM | CSLCSRMRRG | ALY | .SY  | AEN   | FTKIALGHH   | DDMVAT     | TF     | MNLF | FGH  | AK   | LSG | MP   | PKL |     |
| tr A0A0ROATI2 A0A0ROATI2_STEMA | . . . . . | E. | GK | TM | CSLCSRMRRG | ALY | .NY  | AEQN  | FTKIALGHH   | DDMVAT     | TF     | MNLF | FGH  | AK   | LSG | MP   | PKL |     |
| tr A0A2E6LUI9 A0A2E6LUI9_9GAMM | . . . . . | E. | GK | TM | CSLCSRLRRG | ILY | .KAA | TAL   | GNKIALGHH   | DDIET      | TMF    | LNMF | FGSK | LKA  | MP  | AKL  |     |     |
| tr A0A094LT70 A0A094LT70_9GAMM | . . . . . | E. | GK | TT | CSLCSRLRRG | TLY | .GFA | HRI   | GATKIALGHH  | DDIET      | TLF    | LNMF | FGSK | MKA  | MP  | PKL  |     |     |
| tr A0A1I6YH43 A0A1I6YH43_9GAMM | . . . . . | E. | GK | TT | CSLCSRLRRG |     |      |       |             |            |        |      |      |      |     |      |     |     |



tr|A0A1W9JDH2|A0A1W9JDH2\_9PROT . . . . . E.GKTT.CSLCSRLRRGIIY.TTAKELGADKIALGHHRRDDIVETLFLNLFFGAKLKKAMPKKL  
tr|A0A1M5BF43|A0A1M5BF43\_9BURK . . . . . E.GKTT.CGLCSRLRRRAILY.TVADQLGCTKIALGHHRRDDILQTLFLNMFYGRMKGMPPKKL  
tr|A0A2E7TF27|A0A2E7TF27\_9GAMM . . . . . E.GKTM.CSLCSRLRRGIIY.KYAKQNGMNKIALGHHRRDDIETLFLNMFYGGKLLKAMPKKL  
tr|A4BC14|A4BC14\_9GAMM . . . . . E.GKTT.CGICISRLRRSTIY.AFADQIGANKVALGHHRRDDIETLFLNMFYGGKLLKAMPKKL  
tr|A0A2V1GX35|A0A2V1GX35\_9FLAO . . . . . E.GKTT.CSLCSRLRRGIIY.GFAEAHKIDKIALGHHRRDDMIETLFLNLFYGGKLLKAMPKKL  
tr|A0A142BEY8|A0A142BEY8\_9GAMM . . . . . E.GKTT.CGLCSRLRRRGIIY.SFAEEIGATKIALGHHRRDDIVETLFLNMFYGGKLLKAMPKKL  
tr|A0A0J8GW65|A0A0J8GW65\_9ALTE . . . . . E.GKTT.CALCSRLRRGIIY.KTANRLGATKIALGHHRRDDIETLFLNMFYGGKLLKAMPKKL  
tr|A0A1M5FZ26|A0A1M5FZ26\_9GAMM . . . . . E.GKTT.CGLCSRLRRGIIY.GFAEEIGATKVALGHHRRDDIVETLFLNMFYGGKLLKAMPKKL  
tr|A0A257U9D9|A0A257U9D9\_9PROT . . . . . L.GKTT.CSLCSRLRRRGIIY.RTAKALKA TKIVLGHHRRDDMLQTLFLNLFYGGKLLKAMPKKL  
tr|A0A2E9D1E6|A0A2E9D1E6\_9GAMM . . . . . E.GRTT.CGLCSRLRRGIIY.ACADTGC TKIALGHHRRDDIVETLFLNMFYGGKLLKAMPKKL  
tr|A0A126NMX7|A0A126NMX7\_9GAMM . . . . . E.GKTM.CSLCSRLRRRGIIY.TYAEANGFTKIALGHHRRDDMVATFFMNLFFHHSKISGMPKKL  
tr|K6ZRA0|K6ZRA0\_9ALTE . . . . . E.GKTT.CSLCSRLRRGIIY.TNAIKLGVTKIALGHHRRDDMLTFLFLNMFHNGRLKSMPPKKL  
tr|A0A2N0WY52|A0A2N0WY52\_9GAMM . . . . . E.GKTT.CSLCSRLRRGIIY.RTAKELGASKIALGHHRRDDMLATMMNLFFFGGKLLKAMPKKL  
tr|A0A1D2QPG0|A0A1D2QPG0\_9GAMM . . . . . K.GKTT.CGLCSRLRRGIIY.GFAEEIGATKVALGHHRRDDIVETLFLNMFYGGKLLKAMPKKL  
tr|A0A0Q9ESH6|A0A0Q9ESH6\_9GAMM . . . . . E.GKTM.CSLCSRLRRRGIIY.TYAEQQGFTKIALGHHRRDDLVATFFLNLFFFHAKLSGMPKKL  
tr|A0A1V4CCB4|A0A1V4CCB4\_9BURK . . . . . P.GKTM.CSLCSRLRRGIIY.RVARELGATKIALGHHRRDDMLQTLFLNMFYGGKLLKAMPKKL  
tr|A0A1G8SDV5|A0A1G8SDV5\_9GAMM . . . . . E.GKTT.CSLCSRLRRGIIY.GFAQRIGATKIALGHHRRDDMVETLFLNMFYGGKLLKAMPKKL  
tr|A0A0A2XGJ5|A0A0A2XGJ5\_9PAST . . . . . E.GKTT.CSLCSRLRRGIIY.RTAKELRATKIALGHHRRDDMLTFLFLNMFYGGKLLKAMPKKL  
tr|A0A1N6Q9N0|A0A1N6Q9N0\_9GAMM . . . . . E.GKTT.CALCSRLRRGIIY.GFAEEIGANKIALGHHRRDDIETLFLNMFYGGKLLKAMPKKL  
tr|A0A2I9CXW9|A0A2I9CXW9\_9DEIO . . . . . E.GKTT.CSLCSRLRRGIIY.RHAREIGATKIALGHHRRDDIETLFLNMFYGGKLLKAMPKKL  
tr|A0A1Z8A689|A0A1Z8A689\_9GAMM . . . . . E.GKTT.CALCSRLRRGIIY.AFAEEIGATKIALGHHRRDDIETLFLNMFYGGKLLKAMPKKL  
tr|K4KEMO|K4KEMO\_STMAS . . . . . E.GKTT.CGLCSRLRRGIIY.SFAEKIGATKIALGHHRRDDMVETLFLNMFYGGKLLKAMPKKL  
tr|A0A2E0HL83|A0A2E0HL83\_9GAMM . . . . . E.GATT.CGLCSRLRRGIIY.SFAEEINASKIALGHHRRDDMVETLFLNMFYGGKLLKAMPKKL  
tr|A0A2E6UBI3|A0A2E6UBI3\_9GAMM . . . . . E.GKTT.CSLCSRLRRGIIY.KTAKRLGATKIALGHHRRDDMIETLFLNMFYGGKLLKAMPKKL  
tr|A0A2T0VN17|A0A2T0VN17\_9GAMM . . . . . E.GKTT.CALCSRLRRGIIY.GFAEEIGATKVALGHHRRDDIETLFLNMFYGGKLLKAMPKKL  
tr|C7RA21|C7RA21\_KANKD . . . . . E.GKTT.CSLCSRLRRGIIY.SWAEQNGITKIALGHHRRDDIETLFLNMFYGGKLLKAMPKKL  
tr|A0A0A2WH96|A0A0A2WH96\_9GAMM . . . . . E.GKTL.CSLCSRLRRGIIY.AHAEEAGFTKIALGHHRRDDLVATFFLNLFFFHAKLAGMPKKL  
tr|A0A1B3BC99|A0A1B3BC99\_9GAMM . . . . . E.GKTT.CGLCSRLRRGIIY.GWAERNITKIALGHHRRDDMIETLFLNMFYGGKLLKAMPKKL  
tr|A0A2S0VTT1|A0A2S0VTT1\_9ALTE . . . . . E.GKTT.CSLCSRLRRGIIY.RTAKELGATKIALGHHRRDDIETLFLNMFYGGKLLKAMPKKL  
tr|A0A1M7HXG8|A0A1M7HXG8\_9GAMM . . . . . E.GKTT.CALCSRLRRGIIY.GFAEEIGATKVALGHHRRDDIETLFLNMFYGGKLLKAMPKKL  
tr|A0A1H4FYD6|A0A1H4FYD6\_ALKAM . . . . . E.GKTT.CSLCSRLRRGIIY.RTAKELGATKIALGHHRRDDMLTFLFLNMFYGGKLLKAMPKKL  
tr|A0A1N6RTY4|A0A1N6RTY4\_9GAMM . . . . . E.GKTM.CSLCSRLRRGIIY.TYAEENGFTKIALGHHRRDDLVNFFLNLFFFHAKLSGMPKKL  
tr|E6WX66|E6WX66\_PSEUU . . . . . E.GKTM.CSLCSRLRRRGIIY.SYAAEHGFTKIALGHHRRDDMVATFFMNLFFHAKISGMPKKL  
tr|A0A1A9F5J5|A0A1A9F5J5\_9GAMM . . . . . E.GKTT.CGLCSRLRRGIIY.GFADEIGANKIALGHHRRDDIETLFLNMFYGGKLLKAMPKKL  
tr|A0A0Q8EDG6|A0A0Q8EDG6\_9GAMM . . . . . E.GKTM.CSLCSRLRRRGIIY.SYAEQNGFTKIALGHHRRDDLVATFFLNMFFHAKLSGMPKKL  
tr|A0A2E7ZPW4|A0A2E7ZPW4\_9DELT . . . . . P.GKTT.CSLCSRLRRGIIY.SAAQELGCTKVALGHHRRDDIATLFLNFFFCCGLKAMPKKL  
tr|A0A1W1V8N1|A0A1W1V8N1\_9DEIO . . . . . E.GKTT.CALCSRLRRGIIY.SHAREIGATKIALGHHRRDDIETLFLNMFYGGKLLKAMPKKL  
tr|A0A2D9SQE6|A0A2D9SQE6\_9GAMM . . . . . Q.GKTY.CGWCSSRRRGIIY.KFAKRGYNKIALGHHRRDDIETLFLNLFHAGKLLKAMPKKL  
tr|A0A2G2JE37|A0A2G2JE37\_9GAMM . . . . . E.GKTT.CGLCSRLRRGIIY.GYAESIGANKIALGHHRRDDIETLFLNMFYGGKLLKAMPKKL  
tr|H3ZAK4|H3ZAK4\_9ALTE . . . . . E.GKTT.CSLCSRLRRGIIY.RTAKELGATKIALGHHRRDDMLTFLFLNMFYGGKLLKAMPKKL  
tr|A0A258V319|A0A258V319\_9PROT . . . . . E.GKTT.CSLCSRLRRGIIY.TTAKQLGATKIALGHHRRDDIVETLFLNMFYGGKLLKAMPKKL  
tr|A0A1E7Q6F9|A0A1E7Q6F9\_9GAMM . . . . . E.GKTT.CSLCSRLRRGIIY.NTAKKLGATKIALGHHRRDDMLTFLFLNMFYGGKLLKAMPKKL  
tr|A0A1W9KKP7|A0A1W9KKP7\_9PROT . . . . . E.GKTT.CSLCSRLRRGIIY.RVASELGATKIALGHHRRDDIETLFLNMFYGGKLLKAMPKKL  
tr|K2JNE8|K2JNE8\_9GAMM . . . . . E.GKTT.CSLCSRLRRGIIY.RTATELGCTKVALGHHRRDDIETLFLNMFYGGKLLKAMPKKL  
tr|A0A2A5HUD4|A0A2A5HUD4\_9ALTE . . . . . E.GKTT.CGLCSRLRRGIIY.GFAEEIGATKIALGHHRRDDAETLFLNMFYAGRLKAMPKKL  
tr|A0A2U2ADC0|A0A2U2ADC0\_9GAMM . . . . . E.GKTM.CSLCSRLRRGIIY.TYAKENNGFNKIALGHHRRDDIVETLFLNMFYGGTLMKAMPKKL  
tr|A0A2G6EIJ4|A0A2G6EIJ4\_9GAMM . . . . . A.GKTM.CSLCSRLRRGIIY.RCAEENGNKIALGHHRRDDIETLFLNFFFGLNLTMTMPKKL  
tr|A4CAS6|A4CAS6\_9GAMM . . . . . E.GKTT.CSLCSRLRRGIIY.RTAKELGATKIALGHHRRDDMIETLFLNMFYGGKLLKAMPKKL  
tr|A0A2R5F7M4|A0A2R5F7M4\_9PROT . . . . . E.GKTT.CSLCSRLRRGIIY.RTAKELGATKIALGHHRRDDIETLFLNMFYGGTLMKAMPKKL  
tr|M1FGK9|M1FGK9\_9ALTE . . . . . A.GKTT.CGLCSRLRRGIIY.AFAEANGVTKIALGHHRRDDIETLFLNMFYGGKLLKAMPKKL  
tr|A0A1D2X618|A0A1D2X618\_9GAMM . . . . . E.GKTT.CGLCSRLRRGIIY.AFAEEIGATKIALGHHRRDDIVETLFLNMFYGGKLLKAMPKKL  
tr|A0A2E9JUF8|A0A2E9JUF8\_9GAMM . . . . . E.GKTS.CGLCSRLRRGIIY.AFAEKIGADKIALGHHRRDDIVETLFLNMFYGGKLLKAMPKKL  
tr|A0A081KEH3|A0A081KEH3\_9GAMM . . . . . E.GKTT.CGLCSRLRRGIIY.AFAEDIGATKIALGHHRRDDIVETLFLNMFYGGKLLKAMPKKL  
tr|A0A1N7KE69|A0A1N7KE69\_9GAMM . . . . . E.GKTT.CALCSRLRRGIIY.GFAEEIGANKIALGHHRRDDIETLFLNMFYGGKLLKAMPKKL  
tr|A0A0U2ZN38|A0A0U2ZN38\_9ALTE . . . . . E.GKTT.CSLCSRLRRGIIY.RTATELRATKIALGHHRRDDMLTFLFLNMFYGGKLLKAMPKKL  
tr|A0A2S7UWA8|A0A2S7UWA8\_9GAMM . . . . . E.GKTT.CSLCSRLRRGIIY.RTAKELGATKIALGHHRRDDIETLFLNMFHGGKLLKAMPKKL  
tr|A0A0E2Z2P9|A0A0E2Z2P9\_9GAMM . . . . . E.GKTT.CSLCSRLRRGIIY.GTAEELGATKIALGHHRRDDIETLFLNMFHGGTLMKAMPKKL  
tr|A0A290TR64|A0A290TR64\_PSE07 . . . . . E.GKTT.CGLCSRLRRGIIY.SFAEKIGATKIALGHHRRDDIVETLFLNMFYAGRLKAMPKKL  
tr|A0A172YKH4|A0A172YKH4\_9GAMM . . . . . E.GKTT.CGLCSRLRRGIIY.GFAEEIGATKIALGHHRRDDIETLFLNMFYAGRLKAMPKKL  
tr|A0A2N2SFH7|A0A2N2SFH7\_9PROT . . . . . E.GATT.CSLCSRLRRGIIY.TTAKKLGANKIALGHHRRDDIVETLFLNMFYAGRLKAMPKKL  
tr|A0A2N2RWE8|A0A2N2RWE8\_9PROT . . . . . E.GKTT.CSLCSRLRRGIIY.TTAKKLGANKIALGHHRRDDIVETLFLNLFHAGKLLKAMPKKL  
tr|A0A0S8AA06|A0A0S8AA06\_9GAMM . . . . . A.GKTM.CSLCSRLRRGIIY.RVANELGATKIALGHHRRDDIVETLFLNLFHAGKLLKAMPKKL  
tr|A0A1H9YSB8|A0A1H9YSB8\_9ALTE . . . . . E.GKTT.CGLCSRLRRGIIY.NFAEEHGITKIALGHHRRDDIETLFLNMFYGGKLLKAMPKKL  
tr|K2LB06|K2LB06\_9GAMM . . . . . A.GKTT.CSLCSRLRRGIIY.RTAKELGATKIALGHHRRDDMLTFLFLNMFYGGKLLKAMPKKL  
tr|A0A1I0HCR0|A0A1I0HCR0\_THASX . . . . . E.GKTT.CSLCSRLRRRAILY.KTAKQIGATKIALGHHRRDDIETLFLNMFYGGKLLKAMPKKL  
tr|A0A2A5CH30|A0A2A5CH30\_9GAMM . . . . . E.GKTT.CALCSRLRRGIIY.AFAEEIGATKIALGHHRRDDIETLFLNMFYGGKLLKAMPKKL  
tr|A0A2N2VG94|A0A2N2VG94\_9PROT . . . . . E.GKTT.CSLCSRLRRGIIY.RTAEQELGANKIALGHHRRDDIVETLFLNMFYGGKLLKAMPKKL  
tr|A0A0F4Q4B8|A0A0F4Q4B8\_9GAMM . . . . . E.GKTT.CSLCSRLRRGIIY.RTAKELGATKIALGHHRRDDIETLFLNMFYGGKLLKAMPKKL  
tr|A0A246HHM2|A0A246HHM2\_STEMA . . . . . E.GRTM.CSLCSRLRRRGIIY.RHAAEHGFTKIALGHHRRDDSVATFFLNLFFHAKLSAMPKKL  
tr|A0A2K1Q139|A0A2K1Q139\_9GAMM . . . . . E.GKTM.CSLCSRLRRGIIY.SYAEQHGFTKIALGHHRRDDMVNFFLNLFFHAKLSAMPKKL  
tr|A0A2D8KYB7|A0A2D8KYB7\_9GAMM . . . . . E.GKTM.CGLCSRLRRGIIY.DIASREGMTKIALGHHRRDDIVETLFLNMFYAGRLKAMPKKL  
tr|A0A238Z6E0|A0A238Z6E0\_9PROT . . . . . E.GKTT.CSLCSRLRRGIIY.RTAEQELGANKIALGHHRRDDIVETLFLNMFYAGRLKAMPKKL  
tr|K6Z7L1|K6Z7L1\_9ALTE . . . . . E.GKTT.CALCSRLRRGIIY.NTARLNGATKIALGHHRRDDMLTFLFLNMFNGQLKSMPPKKL  
tr|A0A1Q5U4V8|A0A1Q5U4V8\_9GAMM . . . . . E.GKTT.CGLCSRLRRGIIY.SFAEKIGATKIALGHHRRDDIVETLFLNMFHAGRLKAMPKKL  
tr|A0A1D2S491|A0A1D2S491\_9BURK . . . . . E.GKTT.CSVCSRLRRRAILY.RVASELGATKVALGHHRRDDIVETLFLNMFYGGKLLKAMPKKL  
tr|A0A1E7PZD4|A0A1E7PZD4\_9ALTE . . . . . A.GKTT.CSLCSRLRRGIIY.NFAEQHGVTKIALGHHRRDDIETLFLNMFYGGKLLKAMPKKL  
tr|I3ICA1|I3ICA1\_9GAMM . . . . . E.GKTT.CGLCSRLRRGIIY.GFADEIGATKIALGHHRRDDIETLFLNMFYGGKLLKAMPKKL  
tr|A0A244CVN1|A0A244CVN1\_9GAMM . . . . . E.GKTT.CSLCSRLRRGIIY.RTATEIGATKIALGHHRRDDIVETLFLNMFYGGKLLKAMPKKL  
tr|A0A291THA3|A0A291THA3\_9GAMM . . . . . E.GKTT.CALCSRLRRGIIY.RTAEELGCTKIALGHHRRDDIETLFLNMFYGGKLLKAMPKKL  
tr|A0A2I6S9K3|A0A2I6S9K3\_9RHOO . . . . . E.GKTT.CSLCSRLRRGIIY.RTAREIGATRIALGHHRRDDIETLFLNLFHGGRTKAMPKKL  
tr|A0A2M7Y3H3|A0A2M7Y3H3\_9RHOO . . . . . E.GRIA.CPLCSRLRRGIIY.RVAGELGATKIALGHHRRDDIETLFLNLFHGGSLKAMPKKL  
tr|A0A2G2IH67|A0A2G2IH67\_COLSX . . . . . E.NRRT.CGLCSRLRRGIIY.SFAEKIGATKIALGHHRRDDIVETLFLNMFYAGRLKAMPKKL  
tr|A0A261U141|A0A261U141\_9BORD . . . . . E.GKTT.CSLCSRLRRGIIY.RTAKELGANKIALGHHRRDDIVETLFLNLFHGGKLLKAMPKKL  
sp|C5BRQ7|TTCA\_TERTT . . . . . E.GKTT.CGLCSRLRRGIIY.GFAEKIGATKIALGHHRRDDIVETLFLNLFYAGRLKAMPKKL  
tr|A0A1N6F753|A0A1N6F753\_9PROT . . . . . E.GKTT.CSLCSRLRRGIIY.RVASELGATKIALGHHRRDDIETLFLNMFYGGKLLKAMPKKL  
tr|A0A2E2BJH1|A0A2E2BJH1\_9GAMM . . . . . E.GKTT.CALCSRLRRGIIY.GFAEEIGATKVALGHHRRDDIETLFLNMFYGGKLLKAMPKKL  
tr|A0A2W5I668|A0A2W5I668\_9GAMM . . . . . E.GKTL.CSLCSRLRRRGIIY.AYAAEHGFTKIALGHHRRDDMVATFFMNLFFHAKLSAMPKKL  
sp|C4L8F7|TTCA\_TOLAT . . . . . E.GKTT.CSLCSRLRRGIIY.RTASELGATKIALGHHRRDDIETLFLNMFYAGRLKAMPKKL  
tr|B8KS81|B8KS81\_9GAMM . . . . . E.GKTT.CGLCSRLRRGIIY.GFAEQIGATKIALGHHRRDDIVETLFLNMFYGGKLLKAMPKKL  
tr|Z5XT64|Z5XT64\_9GAMM . . . . . E.GKTT.CSLCSRLRRGIIY.RTAKELGATKIALGHHRRDDIETLFLNMFYGGKLLKAMPKKL  
tr|A0A0P6YKA9|A0A0P6YKA9\_VIBSP . . . . . E.GKTT.CGLCSRLRRGIIY.SFAEKIGATKIALGHHRRDDIVETLFLNMFYAGRLKAMPKKL  
tr|R5E7W5|R5E7W5\_9BURK . . . . . D.NRNL.CSLCSRLRRGIIY.RVAREQKCTKIALGHHRRDDVSTLFLNMFYGGKLLKAMPKKL  
tr|A0A2S5KXJ5|A0A2S5KXJ5\_9PROT . . . . . A.GKTT.CALCSRLRRGIIY.RTAKELNCTKVALGHHRRDDIETLFLNMFYGGKLLKAMPKKL  
tr|Z9JMS5|Z9JMS5\_9GAMM . . . . . E.GKTL.CALCSRLRRRGIIY.AYAAEQGFTKIALGHHRRDDMVATFFMNLFFHAKLSAMPKKL  
tr|A0A2S2E3Y6|A0A2S2E3Y6\_9ALTE . . . . . E.GKTT.CSLCSRLRRGIIY.RTASELGATKIALGHHRRDDMIETLFLNMFHGGTLMKAMPKKL  
tr|A0A165SBD0|A0A165SBD0\_9GAMM . . . . . E.GKTT.CGLCSRLRRGIIY.SFAEDIKATKIALGHHRRDDIVETLFLNMFHGGSLKAMPKKL  
tr|A0A2M9ECT5|A0A2M9ECT5\_9GAMM . . . . . E.GKTM.CSLCSRLRRGIIY.TYAEAHGFTKIALGHHRRDDLVNFFLNLFFHAKISGMPKKL  
tr|A0A1A6KZA3|A0A1A6KZA3\_9VIBR . . . . . E.GKTT.CGLCSRLRRGIIY.SFAEKIGATKIALGHHRRDDIVETLFLNMFHAGRLKAMPKKL  
tr|A0A2P6M725|A0A2P6M725\_9GAMM . . . . . E.GKTM.CSLCSRLRRRGIIY.THAKEQGFTKIALGHHRRDDIVATFFMNLFFHAKLATMPKKL  
tr|A0A1Z9SXF6|A0A1Z9SXF6\_9GAMM . . . . . E.GKTY.CGLCSRLRRGIIY.NYABETIGANKIALGHHRRDDIETLFLNMFYGGKLLKAMPKKL  
tr|K6Y991|K6Y991\_9ALTE . . . . . E.GKTT.CSLCSRLRRGIIY.KTATRLGATKIALGHHRRDDMLTFLFLNMFYGGKLLKAMPKKL  
tr|H8L0D3|H8L0D3\_FRAAD . . . . . Q.GKTM.CSLCSRLRRRGIIY.AWAAQNGITKIALGHHRRDDIATLFLNMFYQASLKAMPKKL  
tr|A0A2T3L8L6|A0A2T3L8L6\_9GAMM . . . . . E.GKTT.CGLCSRLRRGIIY.SFAEKIGATKIALGHHRRDDMVETLFLNMFYGGKLLKAMPKKL

tr|A0A1V5G325|A0A1V5G325\_9PROT...E.GK|T.M|CSLCSRLRRG|S|LY|T|Y|A|E|EQ|G|F|TKIALGHH|R|DDL|LAT|FF|LN|L|F|H|H|A|K|L|S|G|MP|PK|L|
tr|A0A290XB88|A0A290XB88\_9GAMM...E.GK|T.M|CSLCSRLRRG|A|LY|S|Y|A|E|EQ|H|G|F|TKIALGHH|R|DDL|VAT|FF|LN|L|F|F|H|A|K|L|S|G|MP|PK|L|
tr|A0A1I2H4G4|A0A1I2H4G4\_9GAMM...E.GK|T.M|CSLCSRLRRG|A|LY|A|F|A|K|Q|Q|G|F|TKIALGHH|R|K|DDI|VAT|FF|LN|L|F|F|H|A|K|L|S|G|MP|PK|L|
tr|A0A176H235|A0A176H235\_9GAMM...E.GK|T.T|CGLCSRLRRG|T|LY|S|F|A|E|E|I|K|A|N|K|I|A|L|G|H|H|K|DDI|VET|MF|LN|L|F|H|G|S|R|L|A|S|MP|PK|L|
tr|A0A2E8YFG2|A0A2E8YFG2\_9GAMM...E.GK|T.M|CGLCSRLRRG|G|LY|T|Y|A|K|T|N|G|I|T|R|I|A|L|G|H|H|R|DDI|IET|LF|LN|L|F|H|G|S|R|L|A|S|MP|PK|L|
tr|A0A2D7P2I3|A0A2D7P2I3\_9GAMM...E.GK|T.T|CGLCSRLRRG|T|LY|G|F|A|E|Q|I|G|A|T|K|I|A|L|G|H|H|R|DDI|VET|LF|LN|L|F|F|H|A|K|L|S|G|MP|PK|L|
tr|A0A0P9FV53|A0A0P9FV53\_9GAMM...E.GK|T.T|CSLCSRLRRG|T|LY|R|T|A|K|E|M|G|A|T|K|I|A|L|G|H|H|R|DDM|IET|MF|LN|L|F|Y|G|G|K|L|K|G|MP|A|K|L|
tr|C1CXB7|C1CXB7\_DEIDV...E.GK|T.T|CALCSRLRRG|I|LY|A|H|A|R|R|I|G|A|T|K|I|A|L|G|H|H|R|DDI|LET|MF|MN|L|F|F|G|A|R|L|K|A|MP|PK|L|
tr|A0A1T4S3B8|A0A1T4S3B8\_9GAMM...E.GK|T.M|CSLCSRLRRG|A|LY|T|F|A|E|E|Q|G|F|N|K|I|A|L|G|H|H|R|DDL|VAT|FF|LN|L|F|F|H|A|K|L|S|G|MP|PK|L|
tr|A0A1M5LQA2|A0A1M5LQA2\_9GAMM...E.GK|T.M|CSLCSRLRRG|A|LY|S|Y|A|H|D|H|G|Y|T|K|I|A|L|G|H|H|R|DDI|LAT|FF|LN|L|F|F|G|S|L|K|A|MP|PK|L|
tr|H8GP88|H8GP88\_METAL...E.GA|T.T|CGLCSRLRRG|I|LY|G|F|A|E|E|H|G|V|T|K|I|A|L|G|H|H|R|DDL|LET|FF|LN|L|F|Y|G|G|K|L|K|A|MP|PK|L|
tr|A0A2D8J379|A0A2D8J379\_9ALTE...D.GK|T.T|CGLCSRLRRG|I|LY|D|F|A|V|D|H|G|V|T|K|I|A|L|G|H|H|R|DDI|LET|LF|LN|L|F|H|G|S|L|K|A|MP|PK|L|
tr|A0A1S8CV92|A0A1S8CV92\_9GAMM...E.GK|T.F|CAVCSRLRRG|S|LY|G|F|A|E|Q|I|G|A|T|K|V|A|L|G|H|H|R|DDI|MAT|FF|LN|L|F|H|G|S|L|K|A|MP|PK|L|
tr|A0A086D1F6|A0A086D1F6\_9GAMM...E.GK|T.T|CALCSRLRRG|S|LY|G|F|A|E|E|I|G|A|T|K|I|A|L|G|H|H|R|E|D|I|ET|LF|LN|L|F|Y|G|G|T|L|K|S|MP|PK|L|
tr|A0A2K8KNB1|A0A2K8KNB1\_9GAMM...D.GK|T.T|CGICSLRRRST|LY|A|F|A|D|Q|I|G|A|N|K|V|A|L|G|H|H|R|DDI|IET|LF|LN|L|F|Y|G|G|K|L|K|A|MP|PK|L|
sp|Q9PFT3|TTCA\_XYLF...E.GK|T.L|CALCSRLRRG|T|LY|A|Y|A|E|T|Q|G|F|T|K|I|A|L|G|H|H|R|DDM|VAT|FF|MN|L|F|H|H|A|K|L|S|G|MP|PK|L|
tr|A0A2E1NM27|A0A2E1NM27\_9GAMM...E.GK|T.T|CGLCSRLRRG|S|LY|G|F|A|V|D|I|G|A|N|K|I|A|L|G|H|H|R|DDI|VET|LF|LN|L|F|F|G|G|K|L|K|A|MP|PK|L|
tr|A0A0P7XJ61|A0A0P7XJ61\_9GAMM...E.GK|T.T|CSLCSRLRRG|I|LY|K|T|A|K|R|L|G|C|T|K|I|A|L|G|H|H|R|DDM|IET|LF|LN|L|F|Y|G|G|T|K|S|MP|PK|L|
tr|W6M556|W6M556\_9GAMM...A.GK|T.T|CGLCSRLRRG|V|LY|S|F|A|E|E|H|G|S|K|I|A|L|G|H|H|R|DDI|IET|LF|LN|L|F|H|G|G|K|L|K|A|MP|PK|L|
tr|A0A2D4SCQ4|A0A2D4SCQ4\_9GAMM...E.GK|T.M|CGLCSRLRRG|I|LY|R|Y|A|N|E|H|G|Y|T|K|I|A|L|G|H|H|R|DDI|VET|LF|LN|L|F|H|G|G|R|L|A|S|MP|PK|L|
tr|A0A1X9NHT9|A0A1X9NHT9\_9GAMM...E.GK|T.T|CALCSRLRRG|T|LY|A|F|A|E|T|I|H|C|T|K|I|A|L|G|H|H|R|DDI|VET|MF|LN|L|F|Y|G|A|K|L|S|A|MP|PK|L|
tr|A0A2E0A0S2|A0A2E0A0S2\_9GAMM...E.GK|T.T|CGLCSRLRRG|T|LY|G|F|A|E|S|I|G|A|N|K|I|A|L|G|H|H|R|DDI|IET|LF|LN|L|F|H|G|G|K|L|K|A|MP|PK|L|
tr|M5E4J8|M5E4J8\_9GAMM...E.GK|T.T|CSLCSRLRRG|T|LY|G|F|A|E|S|I|G|A|N|K|I|A|L|G|H|H|R|DDI|IET|LF|LN|L|F|H|G|G|K|L|K|S|MP|PK|L|
tr|G4QHE8|G4QHE8\_GLANF...E.GK|T.T|CGLCSRLRRG|S|LY|S|F|A|E|S|I|G|A|T|K|I|A|L|G|H|H|R|DDM|VET|TF|LN|L|F|Y|G|A|K|L|K|S|MP|PK|L|
sp|Q9RX35|TTCA\_DEIRA...E.GK|T.T|CGLCSRLRRG|I|LY|Q|H|A|R|E|I|G|A|T|K|I|A|L|G|H|H|R|E|D|I|LET|LF|LN|L|F|Y|G|A|R|L|K|A|MP|PK|L|
tr|A0A2T6E6Y1|A0A2T6E6Y1\_9GAMM...E.GK|T.T|CGICSLRRRST|LY|A|F|A|D|Q|I|G|A|T|K|V|A|L|G|H|H|R|DDI|LET|LF|LN|L|F|H|G|G|K|L|K|A|MP|PK|L|
tr|A0A1H8FZ23|A0A1H8FZ23\_9PROT...E.GK|T.T|CSLCSRLRRG|V|LY|R|V|A|S|E|L|G|A|T|K|I|A|L|G|H|H|R|DDI|LET|LF|LN|L|F|Y|G|G|K|L|K|A|MP|PK|L|
sp|B4SRP3|TTCA\_STRM5...E.GR|T.M|CSLCSRLRRG|A|LY|N|H|A|K|A|H|G|F|T|R|I|A|L|G|H|H|R|C|DDM|VAT|FF|MN|L|F|H|H|A|K|L|S|G|MP|PK|L|
tr|A0A014NTY8|A0A014NTY8\_9GAMM...E.GK|T.T|CGLCSRLRRG|T|LY|S|F|A|E|K|I|G|A|T|K|I|A|L|G|H|H|R|DDI|VET|LF|LN|L|F|H|G|A|K|L|K|A|MP|PK|L|
tr|A0A106CN14|A0A106CN14\_9GAMM...E.GK|T.T|CSLCSRLRRG|S|LY|G|F|A|E|N|I|G|A|T|K|I|A|L|G|H|H|R|DDI|VET|LF|LN|L|F|Y|G|G|T|K|S|MP|PK|L|
tr|A0A2G6D781|A0A2G6D781\_9PROT...E.GK|T.S|CSLCSRLRRG|I|LY|R|A|A|Q|D|L|R|A|T|K|I|A|L|G|H|H|R|E|D|I|LET|LL|LN|L|F|Y|G|G|S|L|K|T|MP|PK|L|
tr|A0A2U9T3K6|A0A2U9T3K6\_9GAMM...E.GK|T.M|CSLCSRLRRG|A|LY|T|W|A|E|E|N|G|Y|N|K|I|A|L|G|H|H|R|DDL|VAT|FF|LN|L|F|F|H|A|K|L|S|G|MP|PK|L|
tr|A0A1I4A399|A0A1I4A399\_9PROT...E.GK|T.T|CSLCSRLRRG|V|LY|R|V|A|S|E|L|G|A|T|K|I|A|L|G|H|H|R|DDL|VAT|FF|LN|L|F|Y|G|G|K|L|K|A|MP|PK|L|
tr|B5JXV2|B5JXV2\_9GAMM...E.GK|T.T|CGLCSRLRRG|T|LY|G|Y|A|E|E|H|G|F|T|K|I|A|L|G|H|H|R|DDM|IET|LF|LN|L|F|Y|A|G|K|K|S|MP|PK|L|
tr|A0A1Z8NXD9|A0A1Z8NXD9\_9PROT...E.GK|T.Q|K|T.T|CALCSRLRRG|I|LY|R|H|A|R|D|I|G|A|T|K|I|A|L|G|H|H|R|E|D|I|LET|LF|MN|L|F|F|G|A|R|L|K|A|MP|PK|L|
tr|A0A0D8CMH3|A0A0D8CMH3\_9GAMM...E.GK|T.M|CGLCSRLRRG|T|LY|K|T|A|N|Q|L|G|V|T|K|I|A|L|G|H|H|R|E|D|I|LET|FF|LN|L|F|H|G|G|R|L|K|A|MP|PK|L|
tr|A0A0M2KFK4|A0A0M2KFK4\_9GAMM...E.GK|T.T|CGLCSRLRRG|T|LY|S|F|A|E|K|I|G|A|T|K|V|A|L|G|H|H|R|DDI|VET|MF|LN|L|F|H|G|A|R|L|K|A|MP|PK|L|
tr|K2AE11|K2AE11\_9ZZZZ...E.GK|T.T|CGLCSRLRRG|T|LY|S|F|A|E|K|I|G|A|T|K|I|A|L|G|H|H|R|DDI|VET|LF|LN|L|F|H|G|A|K|L|K|A|MP|PK|L|
tr|A0A0R0ALL0|A0A0R0ALL0\_9GAMM...E.GN|T.Y|CSLCSRLRRG|I|LY|R|Y|A|E|E|Q|G|F|N|K|I|A|L|G|H|H|R|DDI|IET|LL|MS|L|Y|N|G|Q|I|R|S|MP|PK|L|
tr|R9PKE0|R9PKE0\_AGAAL...E.GK|T.M|CSLCSRLRRG|A|LY|A|Y|A|E|A|Q|G|F|T|K|I|A|L|G|H|H|R|DDM|VAT|FF|MN|L|F|H|H|A|K|L|S|G|MP|PK|L|
tr|A0A1M7YUB2|A0A1M7YUB2\_9VIBR...E.GK|T.T|CGLCSRLRRG|T|LY|R|T|A|E|L|G|A|T|K|I|A|L|G|H|H|R|DDI|LET|LF|LN|L|F|H|G|G|K|L|K|T|MP|PK|L|
tr|A0A1T5I0D4|A0A1T5I0D4\_9GAMM...E.GK|T.T|CGLCSRLRRG|T|LY|S|F|A|E|T|I|G|A|T|K|I|A|L|G|H|H|R|DDI|VET|LF|LN|L|F|Y|G|G|K|L|K|A|MP|PK|L|
tr|A0A128EXQ3|A0A128EXQ3\_9GAMM...E.GK|T.T|CGLCSRLRRG|T|LY|S|F|A|E|K|I|G|A|T|K|I|A|L|G|H|H|R|DDI|VET|MF|LN|L|F|H|G|S|R|L|K|A|MP|PK|L|
tr|A0A1S1MUF5|A0A1S1MUF5\_9GAMM...E.GK|T.T|CGLCSRLRRG|T|LY|S|F|A|E|K|I|G|A|T|K|I|A|L|G|H|H|R|DDM|VET|LF|LN|L|F|H|G|A|R|L|K|G|MP|PK|L|
tr|A0A2X5R8S2|A0A2X5R8S2\_9GAMM...E.GK|T.T|CGLCSRLRRG|T|LY|S|F|A|E|K|I|G|A|T|K|I|A|L|G|H|H|R|DDI|VET|LF|LN|L|F|H|G|A|R|K|A|MP|PK|L|
tr|A0A2N1XCXC2|A0A2N1XCXC2\_9PSED...E.GK|T.T|CSLCSRLRRG|T|LY|S|F|A|E|E|I|G|A|T|K|I|A|L|G|H|H|R|DDM|VET|LF|LN|L|F|Y|Q|A|Q|K|G|MP|PK|L|
tr|A0A2G2H2M8|A0A2G2H2M8\_9GAMM...E.GK|T.T|CGLCSRLRRG|S|LY|G|F|A|E|E|I|G|A|N|K|I|A|L|G|H|H|R|DDI|VET|LF|LN|L|F|Y|G|G|K|K|A|MP|PK|L|
tr|A0A2E4YGT6|A0A2E4YGT6\_9GAMM...E.GK|T.T|CGLCSRLRRG|S|LY|G|F|A|E|E|I|G|A|N|K|I|A|L|G|H|H|R|DDI|VET|LF|LN|L|F|Y|G|G|K|K|A|MP|PK|L|
tr|A0A2G2Q5X8|A0A2G2Q5X8\_9GAMM...E.GK|T.T|CGLCSRLRRG|S|LY|G|F|A|E|E|I|G|A|N|K|I|A|L|G|H|H|R|DDI|VET|LF|LN|L|F|Y|G|G|K|K|A|MP|PK|L|
tr|A0A220SM96|A0A220SM96\_9GAMM...E.GK|T.T|CGLCSRLRRG|S|LY|G|F|A|E|E|I|G|A|N|K|I|A|L|G|H|H|R|DDI|LET|LF|LN|L|F|Y|G|G|K|K|A|MP|PK|L|
tr|A0A2D6RID9|A0A2D6RID9\_9GAMM...E.GK|T.T|CGLCSRLRRG|T|LY|S|F|A|E|D|I|G|A|T|K|I|A|L|G|H|H|R|DDI|VET|LF|LN|L|F|Y|G|G|K|L|K|A|MP|PK|L|
tr|A0A1Q4C5T9|A0A1Q4C5T9\_9PROT...E.GK|T.T|CSLCSRLRRG|V|LY|R|V|A|G|E|L|G|A|T|K|I|A|L|G|H|H|R|DDI|LET|LF|LN|L|F|Y|G|G|K|L|K|T|MP|PK|L|
tr|A0A2U3BB10|A0A2U3BB10\_9VIBR...E.GK|T.T|CGLCSRLRRG|T|LY|S|F|A|E|K|I|G|A|T|K|I|A|L|G|H|H|R|DDI|VET|LF|LN|L|F|H|G|S|R|K|A|MP|PK|L|
tr|A0A2T5JZZ2|A0A2T5JZZ2\_9PROT...E.GK|T.T|CSLCSRLRRG|I|LY|R|V|A|G|E|L|G|A|T|K|I|A|L|G|H|H|R|DDI|LET|LF|LN|L|F|Y|G|G|K|L|K|T|MP|PK|L|
tr|A0A1H7YB07|A0A1H7YB07\_9DEIO...E.GK|T.T|CALCSRLRRG|I|LY|A|H|A|R|R|I|G|A|T|K|I|A|L|G|H|H|R|E|D|I|LET|LF|MN|L|F|F|G|A|R|L|K|A|MP|PK|L|
tr|A0A286D8I8|A0A286D8I8\_9GAMM...E.GK|T.M|CSLCSRLRRG|A|LY|S|Y|A|E|Q|Q|G|F|T|K|I|A|L|G|H|H|R|DDM|VAT|FF|LN|L|F|F|H|A|K|L|S|G|MP|PK|L|
tr|A0A2E5MLP7|A0A2E5MLP7\_9ALTE...E.GK|T.T|CGLCSRLRRG|I|LY|N|F|A|D|E|H|G|V|T|K|I|A|L|G|H|H|R|DDM|LET|LF|LN|L|F|Y|G|G|K|L|K|T|MP|PK|L|
tr|A0A1E5CLD3|A0A1E5CLD3\_9VIBR...E.GK|T.T|CGLCSRLRRG|T|LY|S|F|A|E|K|I|G|A|T|K|I|A|L|G|H|H|R|DDI|VET|MF|LN|L|F|H|G|A|R|L|K|A|MP|PK|L|
tr|A0A246B188|A0A246B188\_9DEIO...P.GK|T.T|CALCSRLRRG|A|LY|R|H|A|R|E|L|G|A|T|K|I|A|L|G|H|H|R|DDI|LET|LF|MN|L|F|Y|G|A|R|L|K|A|MP|PK|L|
tr|A0A2E0TPH4|A0A2E0TPH4\_9DELT...TDG.SA|T.Y|CSLCSRLRRG|I|LY|T|A|A|R|L|G|C|T|K|I|A|L|G|H|H|R|DDA|LET|FL|MN|L|F|Y|A|G|K|Q|A|MP|A|V|Y|
tr|A0A2N1X999|A0A2N1X999\_9GAMM...E.GK|T.T|CSLCSRLRRG|T|LY|S|F|A|E|E|I|G|A|T|K|V|A|L|G|H|H|R|DDM|VET|LF|LN|L|F|Y|Q|A|Q|L|K|G|MP|PK|L|
tr|A0A1G0F8Z3|A0A1G0F8Z3\_9GAMM...E.GK|T.T|CSLCSRLRRG|V|LY|R|T|A|E|L|G|S|K|I|A|L|G|H|H|R|DDI|LET|LL|LN|L|F|Y|G|G|T|L|K|G|MP|PK|L|
tr|A0A2G6L227|A0A2G6L227\_9GAMM...A.GK|T.M|CSLCSRLRRG|I|LY|R|F|A|E|E|N|G|C|T|K|I|A|L|G|H|H|R|DDI|LET|FF|LN|L|F|Y|G|G|S|L|K|T|MP|PK|L|
tr|A0A256CJ46|A0A256CJ46\_9GAMM...P.GK|T.M|CSLCSRLRRG|S|LY|S|F|A|K|E|H|G|Y|N|K|I|A|L|G|H|H|R|DDI|VET|LF|MN|L|F|Y|G|G|T|K|A|MP|PK|L|
tr|A0A2E0YVC0|A0A2E0YVC0\_9GAMM...E.GK|T.T|CGLCSRLRRG|S|LY|G|F|A|R|D|I|G|A|T|R|I|A|L|G|H|H|R|DDI|VET|LF|LN|L|F|Y|G|G|T|K|A|MP|PK|L|
tr|A0A0C5V547|A0A0C5V547\_9GAMM...E.GK|T.T|CGICSLRRRST|LY|A|F|A|E|Q|I|Q|A|N|K|V|A|L|G|H|H|R|DDI|IET|LF|LN|L|F|Y|G|G|K|L|K|A|MP|PK|L|
tr|A0A1Y6BYG6|A0A1Y6BYG6\_9ALTE...E.GK|T.T|CGICSLRRRST|LY|G|F|A|E|Q|I|G|A|T|K|I|A|L|G|H|H|R|DDI|VET|LF|LN|L|F|Y|A|G|R|L|K|A|MP|PK|L|
tr|A0A1Q3VUA6|A0A1Q3VUA6\_9PROT...E.GK|T.T|CSLCSRLRRG|I|LY|R|T|A|K|E|L|G|A|N|K|I|A|L|G|H|H|R|DDM|VH|TF|LN|L|F|F|G|G|K|L|K|A|MP|PK|L|
tr|A0A2G6L2U7|A0A2G6L2U7\_9GAMM...T.GK|T.M|CSLCSRLRRG|I|LY|R|F|A|G|E|N|G|V|T|K|I|A|L|G|H|H|R|K|DDI|LET|FF|LN|L|F|Y|A|G|T|K|T|MP|PK|L|
tr|A0A1U7NY21|A0A1U7NY21\_9DEIO...P.QO|T.T|CTLCSRLRRG|H|LY|A|H|A|R|R|L|G|A|S|K|I|A|L|G|H|H|R|E|D|I|LET|FF|LN|L|F|Y|G|A|R|L|K|A|MP|PK|L|
tr|A0A1Z8RH77|A0A1Z8RH77\_9GAMM...E.GK|T.Y|C|W|C|S|R|F|R|R|G|I|LY|K|Y|A|R|R|H|G|V|T|K|I|A|L|G|H|H|R|DDI|LET|LF|LN|L|F|Y|G|G|K|K|T|MP|PK|L|
tr|A0A2E3A5V1|A0A2E3A5V1\_9BACT...G.DD.NA|T.Y|G|P|C|S|R|L|R|R|G|I|LY|T|A|A|R|I|G|C|N|X|L|A|L|G|H|H|R|DDA|LET|LL|LN|L|F|Y|A|G|R|Q|A|MP|A|S|Y|
tr|A0A2N5Y4E4|A0A2N5Y4E4\_9GAMM...E.GK|T.T|CGLCSRLRRG|T|LY|G|F|A|A|D|I|G|A|T|K|I|A|L|G|H|H|R|DDI|VET|LF|LN|L|F|Y|G|G|S|L|K|A|MP|PK|L|
tr|A0A1E5A1Z7|A0A1E5A1Z7\_9GAMM...E.GR|T.T|CGLCSRLRRG|T|LY|G|F|A|E|Q|H|G|Y|N|K|I|A|L|G|H|H|R|DDI|IET|LF|LN|L|F|H|G|G|S|L|Q|A|MP|PK|L|
tr|A0A0F7JQ50|A0A0F7JQ50\_9DEIO...E.GK|T.T|CALCSRLRRG|I|LY|A|H|A|R|R|I|G|A|T|K|I|A|L|G|H|H|R|DDI|LET|LF|MN|L|F|F|G|A|R|L|K|A|MP|PK|L|
tr|A0A1H9G1B6|A0A1H9G1B6\_9GAMM...E.GK|T.T|CALCSRLRRG|T|LY|G|F|A|E|Q|I|G|A|N|K|I|A|L|G|H|H|R|DDI|LET|FF|LN|L|F|Y|G|G|K|L|K|S|MP|PK|L|
tr|A0A136JWK1|A0A136JWK1\_9BACT...E.GK|T.Y|CSLCSRLRRG|I|LY|T|T|A|V|E|E|K|C|T|K|I|A|L|G|H|H|R|A|D|I|AT|FF|MN|L|F|Y|G|Q|L|K|A|MP|P|I|L|
tr|A0A2T3W7G0|A0A2T3W7G0\_9DEIO...E.GK|T.T|CALCSRLRRG|I|LY|A|H|A|R|R|I|G|A|T|K|I|A|L|G|H|H|R|DDI|LET|LF|MN|L|F|Y|G|A|R|L|K|A|MP|PK|L|
tr|A0A1Y0FU52|A0A1Y0FU52\_9GAMM...E.GK|T.T|CGLCSRLRRG|T|LY|G|F|A|R|D|I|G|A|T|K|I|A|L|G|H|H|R|DDI|LET|LF|LN|L|F|Y|G|G|K|L|K|A|MP|PK|L|
tr|A0A2G6EXR6|A0A2G6EXR6\_9GAMM...A.GK|T.M|CSLCSRLRRG|I|LY|R|C|A|A|E|R|N|C|N|K|I|A|L|G|H|H|R|K|DDI|LET|FF|LN|I|F|F|A|G|T|L|K|T|MP|PK|L|
tr|A0A091B674|A0A091B674\_9GAMM...E.GK|T.M|CSLCSRLRRG|A|LY|R|H|A|K|E|R|G|F|T|K|I|A|L|G|H|H|R|DDL|VAT|FF|MN|L|F|H|H|A|K|L|S|G|MP|PK|L|
tr|A0A2P1PY19|A0A2P1PY19\_9GAMM...E.GK|T.M|CGLCSRLRRG|S|LY|T|F|A|E|R|E|G|F|N|K|I|A|L|G|H|H|R|DDL|VET|MF|LN|L|F|Y|H|A|K|L|S|S|MP|PK|L|
tr|A0A1G5EWZ9|A0A1G5EWZ9\_9GAMM...E.GK|T.Y|CSLCSRLRRG|I|LY|R|Y|A|E|E|K|G|F|N|K|I|A|L|G|H|H|R|DDL|I|R|S|L|MS|L|Y|N|D|I|R|S|MP|PK|L|
tr|A0A2E1XG70|A0A2E1XG70\_9PROT...E.TK|Y.Y|CSLCSRLRRG|I|LY|R|V|A|R|E|S|C|D|A|I|V|L|G|H|H|R|DDA|LET|FM|LN|L|F|Y|G|G|R|A|A|MP|P|R|L|
tr|A0A2N5WYR8|A0A2N5WYR8\_9GAMM...E.GK|T.T|CGLCSRLRRG|N|LY|G|F|A|Q|Q|I|G|A|N|K|I|A|L|G|H|H|R|DDI|VET|LF|LN|L|F|Y|G|G|K|K|A|MP|PK|L|
tr|A0A2I7N8U4|A0A2I7N8U4\_9NEIS...E.GK|T.T|CGLCSRLRRG|I|LY|R|V|A|R|E|I|G|A|T|K|I|A|L|G|H|H|R|DDI|LET|LF|LN|L|F|Y|G|G|K|L|K|G|MP|PK|L|
tr|A0A2D9T881|A0A2D9T881\_9DELT...D.QA|T.Y|CSLCSRLRRG|I|LY|T|A|A|R|L|G|C|N|K|I|A|L|G|H|H|R|DDS|LET|FL|MN|L|F|Y|S|G|K|Q|A|MP|A|V|Y|
tr|A0A2R8CL99|A0A2R8CL99\_9GAMM...E.GK|T.T|CGLCSRLRRG|T|LY|G|F|A|E|E|I|G|A|N|K|I|A|L|G|H|H|R|DDM|LET|LF|LN|L|F|Y|G|G|S|L|K|S|MP|PK|L|
tr|A0A1G0CRC9|A0A1G0CRC9\_9PROT...E.GK|T.T|CSLCSRLRRG|I|LY|R|V|A|G|E|L|G|A|N|K|I|A|L|G|H|H|R|DDM|IET|LF|LN|L|F|F|G|G|K|L|K|A|MP|PK|L|
tr|A0A1J4ZIL9|A0A1J4ZIL9\_9PROT...E.GK|T.T|CSLCSRLRRG|I|LY|K|V|A|G|E|L|G|A|N|K|I|A|L|G|H|H|R|DDM|IET|LF|LN|L|F|Y|A|G|K|L|K|A|MP|PK|L|
tr|A0A2E5Q4D6|A0A2E5Q4D6\_9PROT...A.GK|T.M|CGLCSRLRRG|I|LY|S|F|A|R|K|A|C|M|T|K|I|A|L|G|H|H|R|DDI|VET|LF|LN|L|F|Y|G|G|R|L|K|S|MP|PK|L|
tr|A0A2E6R9S7|A0A2E6R9S7\_9GAMM...E.GK|T.T|CGLCSRLRRG|N|LY|T|F|A|R|E|R|G|F|T|K|I|A|L|G|H|H|R|DDI|VET|FF|LN|L|Y|G|G|A|L|K|A|MP|PK|L|
tr|A0A1S1NZJ4|A0A1S1NZJ4\_9GAMM...E.GK|T.Y|CGLCSRLRRG|T|LY|G|F|A|E|E|I|G|A|T|K|I|A|L|G|H|H|R|DDM|LET|LF|LN|L|F|Y|G|G|T|L|K|S|MP|PK|L|
tr|U1JQ15|U1JQ15\_9GAMM...E.GK|T.T|CGLCSRLRRG|T|LY|S|F|A|E|K|I|G|A|T|K|I|A|L|G|H|H|R|DDI|VET|MF|LN|L|F|H|G|A|R|L|K|A|MP|PK|L|
tr|A0A1R4HE06|A0A1R4HE06\_9GAMM...E.GK|T.T|CGLCSRLRRG|T|LY|G|Y|A|E|R|A|N|G|I|T|K|I|A|L|G|H|H|R|DDI|LET|FF|LN|L|F|Y|G|G|K|L|K|A|MP|PK|L|
tr|A0A2D8WQ79|A0A2D8WQ79\_9GAMM...E.GK|T.T|CGLCSRLRRG|T|LY|S|F|A|E|I|G|A|T|K|I|A|L|G|H|H|R|DDI|LET|LF|LN|L|F|Y|G|G|K|L|K|A|MP|PK|L|
tr|A0A221SZ95|A0A221SZ95\_9DEIO...E.GK|T.T|CALCSRLRRG|I|LY|R|H|A|R|E|I|G|A|T|K|I|A|L|G|H|H|R|DDI|LET|LF|MN|L|F|F|G|A|R|L|K|A|MP|PK|L|
tr|F5SUP2|F5SUP2\_9GAMM...E.GK|T.T|CGICSLRRRST|LY|G|Y|R|A|R|Q|R|G|I|T|K|I|A|L|G|H|H|R|DDI|LET|LF|LN|L|F|Y|G|S|K|I|K|A|MP|PK|L|
tr|A0A0RCFZ1|A0A0RCFZ1\_9GAMM...E.GS|T.M|CSLCSRLRRG|A|LY|A|H|A|K|A|E|G|F|T|K|I|A|L|G|H|H|R|DDM|VAT|FF|LN|L|F|F|H|A|R|L|A|A|MP|PK|L|
tr|A0A1H7YBV0|A0A1H7YBV0\_9GAMM...E.GK|T.M|CSLCSRLRRG|A|LY|A|H|A|K|Q|I|G|F|T|K|I|A|L|G|H|H|R|DDA|VAT|FF|MN|L|F|H|H|A|K|L|S|G|MP|PK|L|
tr|A0A2E9A969|A0A2E9A969\_9ALTE...E.GK|T.T|CGLCSRLRRG|T|LY|G|F|A|E|Q|I|G|A|T|K|I|A|L|G|H|H|R|DDI|VET|LF|LN|L|F|Y|G|G|K|L|K|A|MP|PK|L|
tr|A0A2A2I661|A0A2A2I661\_9ALTE...E.GK|T.T|CGLCSRLRRG|I|LY|N|F|A|E|E|Q|G|V|T|K|I|A|L|G|H|H|R|DDL|LET|LF|LN|L|F|Y|G|G|T|L|K|T|MP|PK|L|



tr|A0A2E9LY13|A0A2E9LY13\_9GAMM . . . . . E. GKTT. CGLCSRLRRGTLTY. GF AEQI GATKIALGHHRDDIVETAF LNMFFG GKLKAMP AKL

tr|A0A1Z8WWD5|A0A1Z8WWD5\_9GAMM . . . . . N. GKTF. CGLCSRLRRGTLTY. RV AKEI GATKIALGHHRDDIETLF LNMFFC SKLKAMP PKL

tr|A0A0F9MI56|A0A0F9MI56\_9ZZZZ . . . . . E. GKTT. CGICSLRRRGSLY. GY ARQN GITKIALGHHRDDIMETLF LNMFFY GKIKAMP PPKL

tr|T1CTQ3|T1CTQ3\_9ZZZZ . . . . . E. GRNR. GYHKLALGHHQD DLETF LNLFFH GRLATMP PPKL

tr|A0A2E2U047|A0A2E2U047\_9GAMM . . . . . V. GKTT. CPICSLRRRGILY. GF ADKI GATKIALGHHRDDIVETLF LNMFFG GRLKAMP PPKL

tr|A0A2E6P5P0|A0A2E6P5P0\_9GAMM . . . . . E. GKTM. CGLCSRLRRGILY. SF AKEE GMNKIALGHHRDDIVETLF LNMFFH GRLKAMP PPKL

tr|FORNE2|FORNE2\_DEI PM . . . . . E. GKTT. CSLCSRLRRGILY. AH ARRL GATKIALGHHRDDIETLF LNMFFG GARLKAMP PPKL

tr|A0A0G9HE90|A0A0G9HE90\_9GAMM . . . . . Q. GKTM. CSLCSRMRRGALY. QW ASDN GITKIALGHHRDDILGTF LNMFFY QGSLKAMP PPKL

tr|A0A2E0Y598|A0A2E0Y598\_9GAMM . . . . . E. GKTT. CPICSLRRRGILY. AC ASRI GATKIALGHHRDDAVETLF LNLFFY GRMKAMP PPKL

tr|A0A2E1LHL9|A0A2E1LHL9\_9PROT . . . . . A. DRVA. CGLCSRLRRGVLY. RT AT EL GATKIALGHHRDDMVETLF LNLFFH AAKLKGMP PPKL

tr|A0A1Y5EW57|A0A1Y5EW57\_9GAMM . . . . . E. GKTT. CGICSLRRRGSLY. GY ARQN GITKIALGHHRDDIETAF LNMFFY GSKVKAMP PPKL

tr|A0A2W4ST11|A0A2W4ST11\_9GAMM . . . . . E. GQTT. CGLCSRLRRGALY. RY AL EN GITKIALGHHRDDIETFFF LNLFFH GRLKAMP PPKL

tr|A0A2E1UIK2|A0A2E1UIK2\_9GAMM . . . . . E. GKTT. CPVCSRLRRGILY. SH AKKI GATKIALGHHRDDVETLF LNMFFY GAKLKAMP PPKL

tr|A0A0W0R3V7|A0A0W0R3V7\_9GAMM . . . . . E. GKTY. CSLCSRLRRGILY. RY AEEQ GFTKIALGHHRDDLIRTF LMSILY NGDIRSMP PPKL

tr|A0A1Y6CSG3|A0A1Y6CSG3\_9GAMM . . . . . E. GKTT. CGLCSRLRRGVLY. RY AAEEN GITKIALGHHRDDIETFFF LNLFFY GAKLKAMP PPKL

tr|A0A2A5A3D3|A0A2A5A3D3\_9GAMM . . . . . E. GKTM. CGLCSRLRRRGSLY. GF AEKIN ATKIALGHHRDDIETLF LNMFFY GSKLKTMP PPKL

tr|N6WRQ1|N6WRQ1\_9ALTE . . . . . E. GKTT. CGLCSRLRRGILY. NF AEEH GVTKIALGHHRDDLETF LNMFFY GRLKAMP PPKL

tr|C6KUT2|C6KUT2\_9BACT . . . . . E. GKTT. CPVCSRMRRGILY. SH ARRI GADKIALGHHRDDVETLF LNLFFY GRLKAMP PPKL

tr|A0A250KVQ9|A0A250KVQ9\_9GAMM . . . . . E. GKTT. CGLCSRLRRGILY. RY AAEH GITKIALGHHRDDIETFFF LNLFFY GTLKAMP PPKL

tr|A0A1G3FEZ7|A0A1G3FEZ7\_9GAMM . . . . . A. GKTM. CSLCSRLRRGALY. TW AAAN GITKIALGHHRDDILATFFF LNLFFY QAQLKAMP PPKL

tr|A0A1B2MZL9|A0A1B2MZL9\_9GAMM . . . . . E. GR TM. CGLCSRLRRGALY. RH AAEN GF SKIALGHHRDDSVATFFF LNLFFH AAKLKSAMP PPKL

tr|A0A2D7VJ4|A0A2D7VJ4\_9GAMM . . . . . E. GKTM. CGLCSRLRRGILY. RY AREN GMSRIALGHHSDMIETLF LNMFFH GQLKSMPP PPKL

tr|A0A2A2F9C1|A0A2A2F9C1\_9GAMM . . . . . E. GKTA. CGLCSRLRRGILY. NF AEEQ GCTKIALGHHRDDIETLMM LNMFFH GRLKAMP PPKL

tr|A0A0W0VN22|A0A0W0VN22\_9GAMM . . . . . E. GKTY. CSLCSRLRRGILY. RY AAEEN GYNKIALGHHRDDIIRTF LLSMFY NGDIRSMP PPKL

tr|A0A2E8KD45|A0A2E8KD45\_9GAMM . . . . . E. GKTT. CGLCSRLRRGNLY. GF AESI GANKIALGHHRDDIETLF LNLFFH GAKLKAMP PPKL

tr|V5BRF5|V5BRF5\_9GAMM . . . . . E. GATT. CGLCSRLRRGTLTY. GY AEAN GITKIALGHHRDDIETFFF LNFIFY GKIKAMP PPKL

tr|G4SXZ6|G4SXZ6\_MET A2 . . . . . E. GQTT. CGLCSRLRRGTLTY. GF AEAN GITKIALGHHRDDIETFFF LNFIFY GKIKAMP PPKL

tr|A0A2N1XMN0|A0A2N1XMN0\_9GAMM . . . . . E. GKTT. CGLCSRLRRGTLTY. GY AEAN GVTKIALGHHRDDIETFFF LNFIFY GKIKAMP PPKL

tr|A0A0F9TJC2|A0A0F9TJC2\_9ZZZZ . . . . . E. GKTT. CGICSLRRRGSLY. GY ARQN GITKIALGHHRDDIETAF LNMFFY GSKLKAMP PPKL

tr|A0A1Y5DWS8|A0A1Y5DWS8\_9GAMM . . . . . E. GKTT. CGICSLRRRGSLY. GY ARQN GITKIALGHHRDDIETTF LNMFFY GSKLKAMP PPKL

tr|A0A1I2HAE1|A0A1I2HAE1\_9GAMM . . . . . E. GKTM. CSLCSRLRRGALY. AW AAAN GITKIALGHHRDDILGTF LNLFFH QAQLKAMP PPKL

tr|A0A1Z8VE82|A0A1Z8VE82\_9PROT . . . . . E. GKTM. CGLCSRLRRGILY. RY ACXN GMNRIALGHHSDMIETLF LNMFFH GQLKSMPP PPKL

tr|A0A2W6RX85|A0A2W6RX85\_9GAMM . . . . . S. GKTT. CGLCSRLRRGILY. RV AEEL GATKIALGHHRDDIETFFF LNLFFY GTLKAMP PPKL

tr|A0A0LOEXB2|A0A0LOEXB2\_9GAMM . . . . . E. GKTT. CSLCSRLRRGSLY. TF AEEI N ATKIALGHHRDDAVETL LNMFFN NGKIKSMPP PPKL

tr|A0A2E9ZJK3|A0A2E9ZJK3\_9GAMM . . . . . A. GKTY. CGLCSRLRRGILY. NY ADSI GASKIALGHHRDDIETLF LNMFFY GSKLKAMP PPKL

tr|A0A2T4E3N7|A0A2T4E3N7\_9PROT . . . . . E. GKTT. CALCSRLRRALY. RT ANEL SA TKIALGHHRDDMLETF LNMFFY GSKLKAMP PPKL

tr|A0A1Y5GPM4|A0A1Y5GPM4\_9GAMM . . . . . D. GEKT. CWLCSRMRRGILY. DA AVHL GVTKIALGHHRDDIETLF LNMFFH GSKIKGMP PPKL

tr|A0A220VEU1|A0A220VEU1\_9GAMM . . . . . E. GKTT. CSLCSRLRRGSLY. SF AEEI N ATKIALGHHMDDVETLF LNMFFN NAKLKAMP PPKL

tr|A0A1Z9E398|A0A1Z9E398\_9GAMM . . . . . E. GKTT. CGLCSRLRRGTLTY. GF AEQI GANKIALGHHRDDIVETAF LNMFFY GKIKAMP PPKL

tr|A0A261GIF8|A0A261GIF8\_9GAMM . . . . . E. GKTT. CGLCSRLRRGILY. DF AVEH GCTKIALGHHRDDIMETLF LNMFFY GSKLKAMP PPKL

tr|A0A2E8J678|A0A2E8J678\_9GAMM . . . . . E. GKTY. CSWCSRFRRGILY. RF AKNN GYNKIALGHHRDDMVETLF LNLFFY GSKLKSMPP PPKL

tr|A0A2D7J8K6|A0A2D7J8K6\_9GAMM . . . . . E. GKTT. CGLCSRLRRGTLTY. GF ADQI GASKIALGHHRDDIVETLF LNLFFG GKLKAMP AKL

tr|A0A1G0D1G5|A0A1G0D1G5\_9PROT . . . . . E. EQTY. CSLCSRLRRGTLTY. EY ASRH GYTKIALGHHRDDLIQSL LMSLFY NGDIRSMP PPKL

tr|A0A26DJJ6|A0A26DJJ6\_9GAMM . . . . . E. GKTT. CGLCSRMRRGTLTY. RW AEEQ GITKIALGHHRDDIETL LNMFFH GSKLKAMP PPKL

tr|Q603CT|TTC A\_METCA . . . . . E. GKTT. CGLCSRLRRGILY. RY AADH GITKIALGHHRDDIETFFF LNLFFY GTLKAMP PPKL

tr|A0A2A5G2D9|A0A2A5G2D9\_9GAMM . . . . . E. GKTT. CGLCSRLRRGILY. SF AEKI GASKIALGHHQDDIETFFF LNMFFN NAKLKTMP PPKL

tr|I1XHY5|I1XHY5\_METN2 . . . . . E. NKTT. CAMCSRLRRGSLY. GY ARQH GITKIALGHHRDDIETLF LNMFFY GKIKAMP PPKL

tr|A0A2G2LPW3|A0A2G2LPW3\_9GAMM . . . . . E. GKTT. CGICSLRRRGSLY. GY ARQN GITKIALGHHRDDIETAF LNMFFY GSKIKAMP PPKL

tr|I8TCV9|I8TCV9\_9GAMM . . . . . E. GKTL. CGLCSRLRRGALY. TY AQEQ GFTKIALGHHRDDILATFFF LNLFFG GSKLKAMP PPKL

tr|A0A2E8K888|A0A2E8K888\_9GAMM . . . . . E. GKTY. CGWCSRFRRGILY. NF AKTH GYNKIALGHHRDDIVETLF LNLFFG GSKLKSMPP PPKL

tr|A0A1Y5FUF8|A0A1Y5FUF8\_9GAMM . . . . . E. NKTY. CGLCSRLRRGSLY. GF AEQI GATKIALGHHRDDIETLF LNMFFY GSKLKSMPP PPKL

tr|A0A2E7EB10|A0A2E7EB10\_9GAMM . . . . . E. GKTT. CGLCSRLRRGTLTY. GF AESI GANKIALGHHRDDIETLF LNMFFY GSKLKAMP PPKL

tr|A0A0F9W8F1|A0A0F9W8F1\_9ZZZZ . . . . . E. GKTT. CGLCSRLRRGSLY. GF AEQI GATKIALGHHRDDIVETLF LNMFFN GSKLKAMP PPKL

tr|A0A1Z9TK40|A0A1Z9TK40\_9PROT . . . . . E. GKTT. CPVCSRLRRGILY. SH AQKI GATKIALGHHRDDVETLF LNMFFY GRLKAMP AKX

tr|A0A1D3RQ23|A0A1D3RQ23\_9BACT . . . . . E. GQTT. CSLCSRLRRGSLY. GY AKA E GITKIALGHHRDDIETFFF LNFIFY AAKLKAMP PPKL

tr|A0A2A4AZU3|A0A2A4AZU3\_9PSED . . . . . E. GKTT. CALCSRLRRGSLY. GF AEEI GATKIALGHHMDDMVETLF LNMFFN GKMKAMP PPKL

tr|A0A2E8CJP9|A0A2E8CJP9\_9GAMM . . . . . Q. GKTM. CGLCSRLRRGILY. RY AREQ GMTRIALGHHRDDMIETLF LNMFFY GQLKSMPP PPKL

tr|A0A0W0TW89|A0A0W0TW89\_9GAMM . . . . . E. GKTY. CSLCSRLRRGILY. RY AEEH GYNKIALGHHRDDIIRTF LLSMFY NGDIRSMP PPKL

tr|I1YG12|I1YG12\_METFJ . . . . . E. GKTT. CGICSLRRRGSLY. SY AREN GITKIALGHHRDDIETLF LNMFFY GSKIKAMP PPKL

tr|A0A1Z4BZX9|A0A1Z4BZX9\_9GAMM . . . . . E. GQTT. CGLCSRLRRGTLTY. GY AEAN GVTKIALGHHRDDIETFFF LNFIFY GKIKAMP PPKL

tr|A0A2E5C3Z9|A0A2E5C3Z9\_9GAMM . . . . . E. GKTY. CSLCSRLRRGTLTY. GF AEQI GATRIALGHHRDDMIETLF LNMFFY GSKLKSMPP PPKL

tr|A0A2T5MF75|A0A2T5MF75\_9GAMM . . . . . E. GKTM. CSLCSRMRRGALY. RY AIEQ GFTKIALGHHRDDIATFFF LNLFFH GSKLSAMP PPKL

tr|A0A1I6KR70|A0A1I6KR70\_9GAMM . . . . . E. GKTM. CSLCSRLRRGALY. QW AADN GVTKIALGHHRDDILGTF LNLFFY QAQLKAMP PPKL

tr|S5THM5|S5THM5\_9GAMM . . . . . E. GKTT. CGLCSRMRRGALY. AY AEDN GF NKIALGHHRDDIETFFF LNMFFY GQLKAMP AKL

tr|A0A2E5MAX8|A0A2E5MAX8\_9GAMM . . . . . E. GKPT. CPLCSRLRRGILY. TF AAKL GATKIALGHHMDDVETLF LNMFFG GRLKGMPP PPKL

tr|A0A1G0JJE0|A0A1G0JJE0\_9GAMM . . . . . E. GKTF. CGLCSRMRRGSLY. AY AKEI GATKIALGHHRDDIVETLF LNMFFG GQLKAMP PPKL

tr|A0A250I8R2|A0A250I8R2\_9DELT . . . . . P. GKTT. CSVCSRMRRGILY. SA AV AL GKNKIALGHHRDDLIHTLL LNLFFAGS IARGMP PPL

tr|A0A250JI97|A0A250JI97\_9DELT . . . . . P. GKTT. CPVCSRLRRGILY. TA AV EL GKNKIALGHHRDDLVHTLL LNLFFAGS IARGMP PPL

tr|A0A2D8XZ99|A0A2D8XZ99\_9GAMM . . . . . E. GKTT. CPVCSRLRRGILY. SH AQKI GATKIALGHHRDDVETLF LNMFFY GRMKSMPP AKL

tr|A0A0S2KD85|A0A0S2KD85\_9GAMM . . . . . E. GKTY. CGLCSRLRRGILY. SY ARQI GANKIALGHHRDDIVETLF LNMFFY GAKLKAMP PPKL

tr|A0A0B4XNW6|A0A0B4XNW6\_9GAMM . . . . . E. GKTT. CALCSRLRRGNLY. GF AEEI GATKIALGHHRDDIVETLF LNMFFN GKMKAMP PPKL

tr|A0A2G2Q9V3|A0A2G2Q9V3\_9GAMM . . . . . E. GKTT. CGICSLRRRGSLY. GY ARQN GITKIALGHHRDDIETAF LNMFFY GSKVKAMP PPKL

tr|A0A133XFF6|A0A133XFF6\_9RHO . . . . . E. GKTT. CGLCSRLRRGILY. KT AKEL GANKIALGHHRDDMVHTLF LNLFFG GSKIKAMP PPKL

tr|A0A2A5CYC0|A0A2A5CYC0\_9GAMM . . . . . E. GKTT. CGLCSRLRRGVLY. GF AEKH GVTKIALGHHRDDIETLF LNMFFG GSKLKAMP PPKL

tr|A0A2A5BHU1|A0A2A5BHU1\_9GAMM . . . . . E. GKTT. CGICSLRRRGALY. GY ARKN GITKIALGHHRDDIETAF LNMFFY GSKLKAMP PPKL

tr|E8U6F5|E8U6F5\_DEIML . . . . . E. GKTT. CGLCSRLRRGILY. TH AKRI GATKIALGHHRDDIETLF LNMFFH GARLKAMP PPKL

tr|A6GKC6|A6GKC6\_9DELT . . . . . P. GKAY. CAVCSRLRRGVLY. NV AERL GKNKIALGHHRDDALETF LNLFFY AGKLQAMP AKY

tr|M7P1R7|M7P1R7\_9GAMM . . . . . E. GKTT. CGICSLRRRGSLY. GF ARES GITKIALGHHRDDIETLF LNMFFG GSKIKAMP PPKL

tr|A0A0K1PVH2|A0A0K1PVH2\_9DELT . . . . . A. GATY. CSLCSRLRRGILY. SA AERL GKNKVALGHHRDDGLETF LNLFFY GSKLQAMP ASF

tr|A0A0F9W6I5|A0A0F9W6I5\_9ZZZZ . . . . . E. GKTY. CGLCSRLRRGSLY. TY ARQI GANKIALGHHRDDIVETLF LNMFFG GKMKAMP PPKL

tr|A0A0R2V9H0|A0A0R2V9H0\_9PROT . . . . . E. GKTT. CSLCSRLRRGILY. KT AKAL EVNKIALGHHKNDIVETFFF LNMFFH GSKLKAMP PPKL

tr|A0A2G6PCZ6|A0A2G6PCZ6\_9GAMM . . . . . T. GATM. CSLCSRLRRGILY. SY ARVH GMTKIALGHHRDDIMETFFF LNLFFY GQLKAMP PPKL

tr|A0A0C1V3E1|A0A0C1V3E1\_9CYAN . . . . . E. GKTM. CGLCSRLRRGVLY. RV AAE E GVTKIALGHHRDDIVETFFF LNLFFH GRMKAMP PPKL

tr|A0A2U2AST5|A0A2U2AST5\_9GAMM . . . . . E. GKTT. CSLCSRLRRGALY. QY AKEG FKNKIALGHHRDDIVETLF LNLFFG GQLKAMP PPKL

tr|A0A1Y5EEL08|A0A1Y5EEL08\_9GAMM . . . . . E. GKTT. CGLCSRMRRGALY. AY AEEHAY NKIALGHHRDDIETFFF LNMFFH GSKLKAMP PPKL

tr|A0A1X1QNJ6|A0A1X1QNJ6\_9GAMM . . . . . E. GKTS. CGLCSRMRRGALY. AY AQEN GYNKISLGHHRDDIVETFFF LNMFFH GQLKAMP AKL

tr|A0A0F7BPK4|A0A0F7BPK4\_MYXFU . . . . . P. GKTT. CAVCSRMRRGILY. TA AV EL GYNKIALGHHRDDLIHTLL LNLFFAGS IARGMP PPL

tr|A0A1G0EFZ6|A0A1G0EFZ6\_9PROT . . . . . E. GKTT. CGLCSRLRRGILY. RV AHEL GANKIALGHHRDDMIETLF LNMFFH GSKLKAMP PPKL

tr|A0A2N1YKY9|A0A2N1YKY9\_9GAMM . . . . . E. GKTT. CGLCSRLRRGTLTY. GF AEEI GANKIALGHHRDDIVETLF LNLFFH GSKLKAMP PPKL

tr|A0A2P8WE43|A0A2P8WE43\_9CYAN . . . . . E. GKTM. CGLCSRLRRGILY. RV AAEER ATKIALGHHRDDMVETLF LNMFFH GRLKGMPP PPKL

tr|A0P4J5|A0P4J5\_9PROT . . . . . E. GKTT. CSLCSRLRRGILY. KK AKAI GANKIALGHHKNDIVETFFF LNMFFH GSKLKAMP PPKL

tr|A0A1Y1SIS5|A0A1Y1SIS5\_9GAMM . . . . . E. GKTT. CGLCSRLRRGALY. SY AEA E GFTKIALGHHMDDIVETLF LNLFFH GARLAAMP PPKL

tr|A0A2A5C6W6|A0A2A5C6W6\_9GAMM . . . . . E. GKSY. CGLCSRLRRGSLY. SY AKKI GASKIALGHHHDLMETLF LNMFFG GSKLKAMP PPKL

tr|A0A2P5MXA3|A0A2P5MXA3\_METSP . . . . . E. GKTT. CSLCSRLRRGTLTY. GF AKEHN I TKIALGHHRDDIETFFF LNMFFY AGKLKAMP PPKL

tr|A0A2E0CPF1|A0A2E0CPF1\_9GAMM . . . . . E. NKTY. CGLCSRLRRGTLTY. GF AKQI GANKIALGHHRDDIVETLF LNMFFY GSKLKAMP PPKL

tr|A0A0R2TBZ4|A0A0R2TBZ4\_9GAMM . . . . . E. GKTF. CGLCSRLRRGILY. NK AV EM GATKIALGHHRDDIVETLF LNMFFY GSKLKAMP PPKL

tr|A0A2P5N529|A0A2P5N529\_METSP . . . . . E. GQTT. CGLCSRLRRGTLTY. GY AEAN GITKIALGHHRDDIETFFF LNFIFY GKIKAMP PPKL

tr|A0A2E7XL11|A0A2E7XL11\_9GAMM . . . . . E. GKTY. CGWCSRFRRGILY. TH AKRH GFTKIALGHHRDDIETLF LNLFFH GSKLKTMP PPKL

tr|A0A2N6EIU6|A0A2N6EIU6\_9DELT . . . . . A. GSSY. CAFCARLRRGSLY. TL ADRL CNKIALGHHRDDLETF LNLFFY GTLGSMPP PPKL

tr|A0A1V8M7R8|A0A1V8M7R8\_9GAMM . . . . . E. GQTT. CGLCSRLRRGILY. GY AQEQ GVTKIALGHHRDDIETFFF LNFIFY AGKLKAMP PPKL

tr|Q2SK22|TTC A\_HAHCH . . . . . E. GKTT. CGLCSRLRRGILY. DF AVEH KTKIALGHHRDDIMETLF LNMFFY GKMKAMP PPKL

tr|A0A1Z5HBC1|A0A1Z5HBC1\_9GAMM . . . . . E. GKTT. CGLCSRLRRGSLY. GY AQEQ GITKIALGHHRDDIETFFF LNFIFY GSKLKAMP PPKL

tr|A0A2S5TJU9|A0A2S5TJU9\_9GAMM . . . . . E. GKTM. CGLCSRLRRGILY. RV AKEI GATKIALGHHMDDMIETLF LNMFFG GQLKAMP PPKL



|                                |           |        |   |            |            |         |            |            |            |        |       |    |       |       |     |    |      |     |     |      |      |      |  |  |
|--------------------------------|-----------|--------|---|------------|------------|---------|------------|------------|------------|--------|-------|----|-------|-------|-----|----|------|-----|-----|------|------|------|--|--|
| tr A4A3N4 A4A3N4_9GAMM         | . . . . . | E. GKT | T | CGLCSRLRRG | TLY. GF    | AESI    | GASRIALGHH | DDIVET     | LF         | LNMFY  | G     | GT | LKAMP | PKL   |     |    |      |     |     |      |      |      |  |  |
| tr A0A2G2KAL2 A0A2G2KAL2_9PROT | . . . . . | D. GKT | M | CGLCSRLRRG | I          | LY. SFA | QSGM       | TKIALGHH   | DDIVET     | LF     | LNMFY | G  | GR    | LKAMP | PKL |    |      |     |     |      |      |      |  |  |
| tr A0A2E5FBG4 A0A2E5FBG4_9GAMM | . . . . . | E. GKT | T | CGLCSRLRRG | I          | LY. AY  | AEEH       | GNKIALGHH  | DDIVET     | LF     | LNMFY | G  | GR    | LKAMP | PKL |    |      |     |     |      |      |      |  |  |
| tr A0A2A4SMP6 A0A2A4SMP6_9GAMM | . . . . . | V. GKT | Y | CGLCSRLRRG | N          | IY. RF  | AEDN       | GNKVALGHH  | DDI        | Q      | SM    | ML | SM    | LYNG  | G   | GR | IRSM | PKL |     |      |      |      |  |  |
| tr A0A0F6W7V0 A0A0F6W7V0_9DELT | . . . . . | P. GKT | Y | CTVCSRLRRG | I          | LY. SA  | AERL       | GCSAIALGHH | DDALE      | T      | FL    | MN | LF    | F     | AG  | K  | Q    | AMP | PAS |      |      |      |  |  |
| tr A0A2FOA0K3 A0A2FOA0K3_9GAMM | . . . . . | E. GKT | Y | CGLCSRLRRG | I          | LY. TY  | AEEQ       | GFTKIALGHH | DDMVET     | LF     | LNLF  | H  | FG    | K     | MA  | S  | PKL  |     |     |      |      |      |  |  |
| sp Q11U13 TTCA_CYTH3           | . . . . . | A. GKT | M | CGLCSRLRRG | S          | LY. AT  | AEEI       | GVTKIALGHH | EDVLET     | FF     | LN    | LF | F     | G     | ME  | A  | P    | KY  |     |      |      |      |  |  |
| tr A0A2P5NEZ4 A0A2P5NEZ4_METSP | . . . . . | E. GKT | T | CGLCSRLRRG | T          | LY. GF  | AHEH       | KISKIALGHH | DDIET      | FF     | LN    | MF | Y     | A     | G   | H  | L    | K   | AMP | PKL  |      |      |  |  |
| tr E1VQC6 E1VQC6_9GAMM         | . . . . . | E. GKT | M | CGLCSRLRRG | H          | LY. SF  | AEEI       | GATKVALGHH | DDIMET     | LF     | LN    | MF | Y     | G     | K   | L  | K    | G   | M   | PKL  |      |      |  |  |
| tr A0A2E2MTL9 A0A2E2MTL9_9GAMM | . . . . . | E. GKT | Y | CGLCSRLRRG | T          | LY. GF  | AEEI       | GATKVALGHH | DDIVET     | LF     | LN    | MF | Y     | G     | K   | L  | K    | A   | M   | PKL  |      |      |  |  |
| tr A0A1Z9FGH1 A0A1Z9FGH1_9GAMM | . . . . . | E. GKT | T | CPVCSRLRRG | I          | LY. TH  | AKKI       | GATKIALGHH | DDVVET     | LL     | LN    | MF | Y     | G     | A   | R  | L    | K   | A   | M    | PAKL |      |  |  |
| tr A0A1I3DY85 A0A1I3DY85_9GAMM | . . . . . | E. GKT | T | CALCSRLRRG | S          | LY. GF  | AEEI       | GATKVALGHH | EDILET     | LF     | LN    | MF | Y     | G     | T   | L  | K    | A   | M   | PKL  |      |      |  |  |
| tr A0A2E2HA01 A0A2E2HA01_9GAMM | . . . . . | E. GKT | S | Y          | CGLCSRLRRG | N       | LY. SY     | AEEI       | GATKIALGHH | DDIMET | LF    | LN | MF    | Y     | G   | K  | L    | K   | A   | M    | PKL  |      |  |  |
| tr K2BLN4 K2BLN4_9ZZZZ         | . . . . . | E. GKT | Y | CGLCSRLRRG | I          | LY. TY  | AEEI       | KISKIALGHH | DDLIQ      | T      | FL    | MS | AF    | Y     | N   | G  | K    | V   | K   | S    | M    | PKL  |  |  |
| tr A0A160DYR1 A0A160DYR1_9GAMM | . . . . . | D. GKT | M | CGLCSRLRRG | I          | LY. DF  | AERE       | GFTKIALGHH | DDIVET     | LF     | LN    | LF | H     | A     | L   | K  | A    | M   | PKL |      |      |      |  |  |
| tr A0A1I1GW43 A0A1I1GW43_9GAMM | . . . . . | E. GKT | T | CGLCSRLRRG | S          | LY. GF  | AEEI       | GATKIALGHH | DDILET     | LF     | LN    | LF | F     | G     | S   | I  | K    | S   | M   | PKL  |      |      |  |  |
| tr A0A2G2QJ4A A0A2G2QJ4A_9GAMM | . . . . . | E. GKT | T | CGLCSRLRRG | I          | LY. AY  | AEEH       | GNKIALGHH  | DDILET     | FF     | LN    | MF | Y     | G     | Q   | L  | K    | A   | M   | PAKL |      |      |  |  |
| tr A0A1X1QH62 A0A1X1QH62_9GAMM | . . . . . | E. GKT | T | CGLCSRLRRG | I          | LY. AY  | AEEH       | GNKIALGHH  | DDIET      | FF     | LN    | MF | Y     | G     | Q   | L  | K    | A   | M   | PAKL |      |      |  |  |
| tr A0A0B6X1V9 A0A0B6X1V9_9BACT | . . . . . | E. GKT | Y | CSVCSRLRRG | I          | LY. QT  | AVEE       | GCSKIALGHH | ADDIT      | T      | FL    | LN | LF    | F     | I   | G  | L    | K   | A   | M    | PVL  |      |  |  |
| tr A0A1E2VEV8 A0A1E2VEV8_9GAMM | . . . . . | E. GKT | T | CGLCSRLRRG | T          | LY. GY  | AEEI       | GATKIALGHH | DDILET     | LF     | LN    | MF | Y     | G     | T   | L  | K    | A   | M   | PKL  |      |      |  |  |
| tr A0A1K1VFB2 A0A1K1VFB2_9GAMM | . . . . . | E. GKT | T | CGLCSRLRRG | T          | LY. GF  | AEEI       | GATKIALGHH | DDILET     | LF     | LN    | LF | F     | G     | S   | L  | K    | A   | M   | PKL  |      |      |  |  |
| sp Q1QZ76 TTCA_CHRS            | . . . . . | E. GKT | T | CALCSRLRRG | T          | LY. GF  | AEEI       | GANKVALGHH | EDMLET     | LF     | LN    | MF | Y     | G     | S   | L  | K    | S   | M   | PKL  |      |      |  |  |
| tr A0A1Q7Y781 A0A1Q7Y781_9BACT | . . . . . | E. GKT | Y | CSVCSRLRRG | I          | LY. NT  | AVEE       | GCTKIALGHH | ADDIAT     | FL     | LN    | LF | Y     | V     | G   | T  | L    | K   | A   | M    | PVL  |      |  |  |
| tr A0A078MNG2 A0A078MNG2_9PSED | . . . . . | E. GKT | T | CGLCSRLRRG | N          | LY. TF  | ADEI       | GATKMAHGHH | DDIVET     | FF     | LN    | MF | Y     | G     | N   | L  | K    | A   | M   | PAKL |      |      |  |  |
| tr A0A2E4UVU2 A0A2E4UVU2_9GAMM | . . . . . | E. GKT | Y | CGWCSRFRRG | I          | LY. RF  | ARER       | GYNKIALGHH | DDIMET     | LF     | LN    | LF | H     | G     | K   | L  | T    | M   | PKL |      |      |      |  |  |
| tr A0A2E8VQS3 A0A2E8VQS3_9GAMM | . . . . . | E. GKT | Y | CGWCSRFRRG | I          | LY. RF  | AREQ       | GYNKIALGHH | DDIMET     | LF     | LN    | LF | H     | G     | K   | L  | T    | M   | PKL |      |      |      |  |  |
| tr A0A1X1QKH8 A0A1X1QKH8_9GAMM | . . . . . | E. GKT | T | CGLCSRLRRG | I          | LY. AY  | AEEH       | GNKIALGHH  | DDIET      | FF     | LN    | MF | Y     | G     | Q   | L  | K    | A   | M   | PAKL |      |      |  |  |
| tr A0A0K0XS81 A0A0K0XS81_9GAMM | . . . . . | E. GKT | T | CGLCSRLRRG | I          | LY. EF  | AREN       | GMSKIALGHH | DDIVET     | FF     | LN    | LF | H     | A     | S   | L  | K    | A   | M   | PAKL |      |      |  |  |
| tr A0A0W0XNH6 A0A0W0XNH6_9GAMM | . . . . . | E. GKT | Y | CGLCSRLRRG | I          | LY. RY  | AEEH       | GFTKIALGHH | DDLIET     | LM     | MS    | T  | LY    | NG    | D   | I  | R    | S   | M   | PKL  |      |      |  |  |
| tr A0A2I2TD26 A0A2I2TD26_9BURK | . . . . . | E. GKT | T | CGLCSRLRRG | I          | LY. RV  | ALEE       | GATKIALGHH | DDILET     | LL     | MN    | MF | H     | G     | K   | L  | K    | G   | M   | PAKL |      |      |  |  |
| tr A0A2J6IVU2 A0A2J6IVU2_9DELT | . . . . . | P. GKT | Y | CSFCAIRLRG | V          | LY. TL  | ADEL       | CNKIALGHH  | DDIET      | LL     | LN    | Q  | F     | Y     | V   | G  | S    | L   | K   | A    | M    | PAKL |  |  |
| tr A0A2S6F1D8 A0A2S6F1D8_LEGPN | . . . . . | E. GKT | Y | CGLCSRLRRG | I          | LY. RY  | AEEH       | GFTKIALGHH | DDLIET     | LM     | MS    | T  | LY    | NG    | D   | I  | R    | S   | M   | PKL  |      |      |  |  |
| tr A0A1G0KEH2 A0A1G0KEH2_9GAMM | . . . . . | E. DKT | M | CGLCSRLRRG | I          | LY. SF  | AKRQ       | GFTKIALGHH | DDIET      | LF     | LN    | MF | Y     | G     | K   | L  | K    | A   | M   | PAKL |      |      |  |  |
| tr A0A1Q4DS47 A0A1Q4DS47_9GAMM | . . . . . | E. GKT | Y | CGLCSRLRRG | I          | LY. RY  | AEEH       | GFTKIALGHH | DDLIET     | LM     | MS    | T  | LY    | NG    | D   | I  | R    | S   | M   | PKL  |      |      |  |  |
| tr A0A0W1A0B9 A0A0W1A0B9_9GAMM | . . . . . | E. GKT | Y | CGLCSRLRRG | I          | LY. RY  | AEEH       | GNKIALGHH  | DDLIET     | LM     | MS    | T  | LY    | NG    | D   | I  | R    | S   | M   | PKL  |      |      |  |  |
| tr A0A2E0K3M4 A0A2E0K3M4_9GAMM | . . . . . | E. GKT | T | CGLCSRLRRG | T          | LY. GF  | AESI       | GANKIALGHH | DDIET      | LF     | LN    | MF | Y     | G     | K   | L  | K    | A   | M   | PAKL |      |      |  |  |
| tr A0A2G2PS69 A0A2G2PS69_9RHOB | . . . . . | E. GKT | T | CGLCSRLRRG | T          | LY. GF  | AESI       | GANKIALGHH | DDIET      | LF     | LN    | MF | Y     | G     | K   | L  | K    | A   | M   | PAKL |      |      |  |  |
| sp B0CEK4 TTCA_ACAM1           | . . . . . | E. GKT | M | CGLCSRLRRG | I          | LY. RV  | AEEI       | GATKIALGHH | DDIET      | LF     | LN    | LF | H     | A     | G   | L  | E    | A   | M   | PAKL |      |      |  |  |
| tr A0A1H8PL64 A0A1H8PL64_9GAMM | . . . . . | E. GKT | M | CGLCSRLRRG | I          | LY. TA  | AEEH       | GMSKIALGHH | DDIVET     | LF     | LN    | LF | Y     | G     | R   | L  | A    | T   | A   | M    | PAKL |      |  |  |
| tr A0A150WJT3 A0A150WJT3_BDEBC | . . . . . | Q. GKT | Y | CGLCSRLRRG | I          | LY. DY  | AHAM       | GFTKIALGHH | DDVVET     | AL     | LN    | LF | Y     | I     | G   | T  | L    | A   | M   | PAKL |      |      |  |  |
| tr A0A2V8SJ7 A0A2V8SJ7_9BACT   | . . . . . | E. GKT | F | CGLCSRLRRG | I          | LY. TT  | AEEH       | GCTKIALGHH | ADDIET     | FL     | LN    | LF | F     | Y     | G   | L  | K    | A   | M   | PAKL |      |      |  |  |
| tr A0A2E0PXG2 A0A2E0PXG2_9GAMM | . . . . . | E. NKT | Y | CGLCSRLRRG | I          | LY. RF  | AKEH       | GYTKIALGHH | DDIET      | LF     | LN    | MF | Y     | G     | R   | L  | K    | S   | M   | PAKL |      |      |  |  |
| tr A0A0W0YHS4 A0A0W0YHS4_9GAMM | . . . . . | E. GKT | Y | CGLCSRLRRG | I          | LY. RY  | AEEH       | GFTKIALGHH | DDMIRT     | FM     | MS    | V  | LY    | NG    | D   | I  | R    | S   | M   | PAKL |      |      |  |  |
| tr A0A0W0YX04 A0A0W0YX04_LEGSP | . . . . . | E. GKT | Y | CGLCSRLRRG | I          | LY. RY  | AEEH       | GFTKIALGHH | DDLIET     | LM     | MS    | T  | LY    | NG    | D   | I  | R    | S   | M   | PAKL |      |      |  |  |
| tr A0A0W0Y1A5 A0A0W0Y1A5_9GAMM | . . . . . | E. GKT | Y | CGLCSRLRRG | I          | LY. RY  | AEEH       | GFTKIALGHH | DDLIET     | LM     | MS    | T  | LY    | NG    | D   | I  | R    | S   | M   | PAKL |      |      |  |  |
| tr A0A2V8N211 A0A2V8N211_9BACT | . . . . . | E. GKT | S | CAVCSRLRRG | I          | LY. NI  | AVEE       | GCSKIALGHH | ADDIET     | FL     | LN    | LF | F     | Y     | G   | L  | K    | A   | M   | PVL  |      |      |  |  |
| tr A0A2D6K8G1 A0A2D6K8G1_9GAMM | . . . . . | E. DKT | Y | CGLCSRLRRG | I          | LY. TY  | AONK       | GFTKIALGHH | DDIET      | FF     | LN    | LF | H     | A     | G   | L  | K    | A   | M   | PVL  |      |      |  |  |
| tr A0A1Y0I978 A0A1Y0I978_9GAMM | . . . . . | E. GKT | T | CGLCSRLRRG | I          | LY. DV  | AQDK       | GATKIALGHH | DDILET     | LF     | LN    | MF | Y     | G     | K   | L  | K    | A   | M   | PAKL |      |      |  |  |
| tr A0A2E1SSR6 A0A2E1SSR6_9GAMM | . . . . . | E. DKT | F | XGLXSRLRRG | T          | LY. GF  | AXKI       | GATKXALGHH | DDIVET     | LF     | LN    | MF | Y     | G     | K   | L  | K    | A   | M   | PAKL |      |      |  |  |
| tr A0A2H9SJG2 A0A2H9SJG2_9GAMM | . . . . . | E. GNT | Y | CGLCSRLRRG | I          | LY. RY  | AEEH       | GYTKIALGHH | DDLIET     | LM     | MS    | T  | LY    | NG    | D   | I  | R    | S   | M   | PAKL |      |      |  |  |
| tr A0A0Q9YJP1 A0A0Q9YJP1_9COXI | . . . . . | E. NST | Y | CGLCSRLRRG | I          | LY. RY  | AEEH       | GFTKIALGHH | DDLIET     | LM     | MS    | T  | LY    | NG    | D   | I  | R    | S   | M   | PAKL |      |      |  |  |
| tr F3KCP3 F3KCP3_9GAMM         | . . . . . | E. GKT | T | CALCSRLRRG | S          | LY. GF  | ANEI       | GATKIALGHH | DDIMET     | LF     | LN    | MF | Y     | G     | K   | L  | K    | A   | M   | PAKL |      |      |  |  |
| tr A0A162H722 A0A162H722_9GAMM | . . . . . | E. GKT | T | CGLCSRLRRG | S          | LY. GF  | AQDI       | GATKIALGHH | DDIVET     | LF     | LN    | MF | Y     | G     | S   | L  | K    | A   | M   | PAKL |      |      |  |  |
| tr A0A2H0I774 A0A2H0I774_9GAMM | . . . . . | E. NKT | Y | CGLCSRLRRG | I          | LY. RY  | AKDH       | GFTKIALGHH | DDIET      | LM     | MS    | T  | LY    | NG    | D   | I  | R    | S   | M   | PAKL |      |      |  |  |
| tr H8MUK0 H8MUK0_CORCM         | . . . . . | P. GKT | Q | CSVCSRLRRG | I          | LY. NA  | AVHL       | CNKIALGHH  | DDLIET     | LM     | LN    | MF | F     | A     | G   | S  | L    | K   | A   | M    | PVL  |      |  |  |
| tr A0A2A5BA99 A0A2A5BA99_9GAMM | . . . . . | E. GKT | F | CGLCSRLRRG | I          | LY. NY  | ADSI       | GASKIALGHH | DDIVET     | LF     | LN    | MF | Y     | G     | K   | L  | K    | A   | M   | PAKL |      |      |  |  |
| tr A0A098G0M4 A0A098G0M4_9GAMM | . . . . . | E. GKT | Y | CGLCSRLRRG | I          | LY. RY  | AEEH       | GFTKIALGHH | DDLIET     | LM     | MS    | T  | LY    | NG    | D   | I  | R    | S   | M   | PAKL |      |      |  |  |
| tr A0A2D7G655 A0A2D7G655_9GAMM | . . . . . | E. GKT | T | CPICSLRRRG | I          | LY. AH  | AKEI       | GANKIALGHH | DDIVET     | LF     | LN    | MF | Y     | G     | A   | K  | L    | K   | A   | M    | PAKL |      |  |  |
| tr A0A2G6KVY6 A0A2G6KVY6_9GAMM | . . . . . | E. GKT | T | CGLCSRLRRG | S          | LY. GF  | AKQI       | GATKIALGHH | DDIVET     | LF     | LN    | MF | Y     | G     | S   | L  | K    | A   | M   | PAKL |      |      |  |  |
| tr W5WZF1 W5WZF1_BDEBC         | . . . . . | Q. GAT | Y | CGLCSRLRRG | I          | LY. DF  | AYDN       | KFTKMAHGHH | DDIVET     | AL     | LN    | Q  | F     | Y     | I   | G  | T    | A   | A   | M    | PAKL |      |  |  |
| tr A0A078LOC8 A0A078LOC8_9GAMM | . . . . . | E. GKT | Y | CGLCSRLRRG | I          | LY. RY  | AEEH       | GFTKIALGHH | DDLIET     | LM     | MS    | T  | LY    | NG    | D   | I  | R    | S   | M   | PAKL |      |      |  |  |
| tr G9ENU4 G9ENU4_9GAMM         | . . . . . | E. GKT | Y | CGLCSRLRRG | I          | LY. RY  | AEEH       | GNKIALGHH  | DDIVET     | LM     | MS    | T  | LY    | NG    | D   | I  | R    | S   | M   | PAKL |      |      |  |  |
| tr A0A2F0AMS3 A0A2F0AMS3_9DELT | . . . . . | P. GKT | F | CAPCSRLRRG | I          | LY. TT  | AERL       | GCKNIALGHH | DDILET     | LM     | MN    | MF | F     | G     | K   | L  | A    | M   | PVL |      |      |      |  |  |
| tr A0A2V8RKE7 A0A2V8RKE7_9BACT | . . . . . | E. GKT | F | CGLCSRLRRG | I          | LY. NV  | AVEE       | GCTKIALGHH | DDIET      | FL     | LN    | LF | F     | Y     | G   | L  | K    | A   | M   | PVL  |      |      |  |  |
| tr A0A2E1TYN5 A0A2E1TYN5_9GAMM | . . . . . | E. GKT | Y | CGLCSRLRRG | I          | LY. NY  | AEEI       | GANKIALGHH | DDIET      | LF     | LN    | MF | Y     | G     | R   | L  | K    | A   | M   | PAKL |      |      |  |  |
| tr A0A193LJH7 A0A193LJH7_9GAMM | . . . . . | E. GKT | M | CGLCSRLRRG | T          | LY. GT  | AQEI       | GATKIALGHH | DDIVET     | LM     | LN    | MF | H     | G     | S   | R  | L    | K   | T   | M    | PAKL |      |  |  |
| tr A0A2E7IRI1 A0A2E7IRI1_9GAMM | . . . . . | E. GKT | T | CALCSRLRRG | S          | LY. GF  | SEEI       | GATKIALGHH | DDIVET     | LM     | LN    | MF | F     | Q     | A   | K  | L    | A   | M   | PAKL |      |      |  |  |
| tr A3YAC1 A3YAC1_9GAMM         | . . . . . | E. GKT | T | CGLCSRLRRG | S          | LY. GF  | ADEI       | GATKIALGHH | DDILET     | LF     | LN    | MF | Y     | G     | K   | L  | K    | A   | M   | PAKL |      |      |  |  |
| tr A0A2E0VG16 A0A2E0VG16_9GAMM | . . . . . | E. DKT | Y | CGLCSRLRRG | T          | LY. GF  | AEEI       | GATKIALGHH | DDIET      | LF     | LN    | LF | Y     | G     | N   | L  | K    | A   | M   | PAKL |      |      |  |  |
| tr A0A2E8CCG6 A0A2E8CCG6_9DELT | . . . . . | E. SKT | F | CGLCSRLRRG | I          | LY. NH  | AVSI       | GATKIALGHH | EDIVET     | LF     | LN    | MF | Y     | G     | K   | L  | K    | S   | M   | PAKL |      |      |  |  |
| tr A0A095VPL1 A0A095VPL1_9GAMM | . . . . . | E. GKT | T | CGLCSRLRRG | T          | LY. GF  | AEEI       | GATRIALGHH | DDIVET     | LF     | LN    | MF | Y     | G     | K   | L  | K    | A   | M   | PAKL |      |      |  |  |
| tr A0A0N8KMU5 A0A0N8KMU5_9CYAN | . . . . . | E. GKT | M | CGLCSRLRRG | I          | LY. RV  | AEEI       | GATKIALGHH | DDMVET     | LF     | LN    | LF | H     | G     | R   | L  | K    | A   | M   | PAKL |      |      |  |  |
| tr A0A1G0HAT3 A0A1G0HAT3_9GAMM | . . . . . | E. GKT | Y | CGLCSRLRRG |            |         |            |            |            |        |       |    |       |       |     |    |      |     |     |      |      |      |  |  |

tr|AOA0S2TB27|AOA0S2TB27\_9GAMM . . . . . E.NKTTY.CSLCSRLRRGSIY.SYAAKHGFSKIALGHHRDDLIQSLMMSILYNGEIKSMPPKLL

tr|AOA2E3UPR5|AOA2E3UPR5\_9GAMM . . . . . N.GKTTY.CGLCSRLRRGILY.NHATSVGADKIALGHHRDDLIETLFLNMFHGRISAMPPKLL

tr|AOA0K1PU12|AOA0K1PU12\_9DELT . . . . . E.GKTF.CSLCSRLRRGILY.RVAKEFGCTKIALGHHRDDLIQTLNLFNFAQGLGAMPPKLL

tr|AOA2W1MVY8|AOA2W1MVY8\_9FLAO . . . . . V.GKTT.CSLCSRLRRGNLY.TAAQNLGCKNKMIGHHRRDDIETFFLNLFAGKIDETMPKKY

tr|AOA2E7LLC8|AOA2E7LLC8\_9GAMM . . . . . D.GKTTY.CPICSLRLRRGILY.NRANVLGATKIALGHHRDDAVETLFLNMFYGKKMKSMPPKLL

tr|AOA1V3PAW7|AOA1V3PAW7\_9GAMM . . . . . A.GKTM.GITKIALGHHRDDIATLFFLNLFHQASLKMPPKLL

tr|AOA2A5WDX1|AOA2A5WDX1\_9GAMM . . . . . E.GKTTY.CGLCSRLRRGILY.NYADSIGADKIALGHHRDDIVETLFLNMFYGKKLKAMPPKLL

tr|AOA0W0X021|AOA0W0X021\_9GAMM . . . . . E.GKTTY.CSLCSRLRRGILY.RYAEHGFNFKIALGHHRDDLIRLTMMSILYNGDIRSMPPKLL

tr|AOA1G0IH91|AOA1G0IH91\_9GAMM . . . . . E.GKTTY.CSLCSRLRRGNLY.RYAIENKFNKIALGHHRDDCIQTLMSILYAGQIKSMPPKLL

tr|AOA0C2DGF4|AOA0C2DGF4\_9DELT . . . . . P.GKAFF.CAACSLRLRRGVLY.THAARLGCKNFKIALGHHRDDALETLNLFYTGKLOAMPKPY

tr|AOA2D5QFH6|AOA2D5QFH6\_9GAMM . . . . . D.GKTTY.CSLCSRLRRGILY.EFAKKIDANKIALGHHRDDIETLFLNMFYGKKLKAMPPKLL

tr|AOA2E4LJ98|AOA2E4LJ98\_9GAMM . . . . . S.GKTTY.CSLCSRLRRGILY.NYAEIEGADKIALGHHRDDIVETLFLNMFYGKKLKAMPPKLL

tr|AOA2E5DC90|AOA2E5DC90\_9GAMM . . . . . E.GKTF.CPICSLRLRRGVLY.KRAGVLGATKIALGHHRDDAVETLFLNMFYGKKLKSMPPKLL

tr|AOA2E5FWR7|AOA2E5FWR7\_9GAMM . . . . . P.GATM.CGLCSRLRRGILY.RYAREQGFNRIALGHHRDDIVETMFLNMFHGRMAAMPKLL

tr|AOA1G0IU32|AOA1G0IU32\_9GAMM . . . . . E.GKTTY.CSLCSRLRRGILY.TYAAQHGFNFKIALGHHRDDLIQTLMSILYSGQVRSMPPKLL

tr|AOA0F9U426|AOA0F9U426\_9ZZZZ . . . . . E.GKTT.CSLCSRLRRGNLY.NFADEIGATRMALGHHRDDIVETFFLNMFHGNLKMAMPKLL

tr|AOA2E6YYL5|AOA2E6YYL5\_9GAMM . . . . . T.GKTF.CPICSLRLRRGILY.TKAKEFGATKIALGHHRDDAVETLFLNMFYGKKMKTMPKLL

tr|AOA1H1PAT6|AOA1H1PAT6\_9PSED . . . . . E.GKTTY.CSLCSRLRRGNLY.TFADEIGATKMALGHHRDDIETFFLNMFYGKKLKAMPPKLL

tr|AOA2E8C6H5|AOA2E8C6H5\_9GAMM . . . . . E.GKTT.CSLCSRLRRGNLY.TFADEIGATKMALGHHRDDIVETFFLNMFYGNLKMAMPKLL

tr|AOA1H1SJ01|AOA1H1SJ01\_9PSED . . . . . E.GKTT.CSLCSRLRRGNLY.TFADEIGATKMALGHHRDDIVETFFLNMFYGNLKMAMPKLL

tr|AOA1G5P4B8|AOA1G5P4B8\_9PSED . . . . . E.GKTT.CSLCSRLRRGILY.TFADEIGATKMALGHHRDDMVETFFLNLFHGGTLKAMPKLL

tr|AOA2E0GTV8|AOA2E0GTV8\_9GAMM . . . . . E.GKTTY.CSLCSRLRRGNLY.RYAEHGFTKVALGHHRDDIETLMSILYGGQVRSMPPKLL

tr|AOA139SJ77|AOA139SJ77\_9GAMM . . . . . Q.GKTT.CSLCSRLRRGILY.DFAEEHGAASKIALGHHRDDIETFFLNLFYGRKLKAMPKLL

tr|AOA2E3MG92|AOA2E3MG92\_9GAMM . . . . . A.GKTTY.CSLCSRLRRGILY.RYAEQHGATKIALGHHRDDIVRTLMSILYNGEVRSMPPKLL

tr|AOA2G6Q111|AOA2G6Q111\_9BACT . . . . . D.GKTI.CSLCSRLRRGILY.TTARQKGCNKIALGHHRDDIETFMLNFKLYNGILKTMPKLL

tr|B8HNP7|B8HNP7\_CYAP4 . . . . . E.GKTM.CGLCSRLRRGILY.RVATEEGATKIALGHHRDDIVETLFLNLFAGQGLKAMPKLL

tr|AOA2E8XFZ6|AOA2E8XFZ6\_9GAMM . . . . . E.GKTF.CSLCSRLRRGILY.NYAESIGADKIALGHHRDDIVETLFLNMFYGKKLKAMPKLL

tr|AOA2D8QNY1|AOA2D8QNY1\_9GAMM . . . . . E.GKTTY.CGWCSRFRRGILY.KYARNHGYNKIALGHHRDDMVETXFLNMFHGGKLSMPPKLL

tr|AOA2N1WJ42|AOA2N1WJ42\_9GAMM . . . . . E.GKTT.CGLCSRLRRGILY.RFAENHGMTKIALGHHRDDIVETFFLNLFHGGKLSMPPKLL

| tr|K2ERR8|K2ERR8\_9ZZZZ | . . . . . | K.DKSY | .TCLCSRLRRGILY | .TFAKKH | GYNKIALGHHRDDIET | FFLNMFY | SGIISMPKLL |
| tr|AOA0K1XH68|AOA0K1XH68\_9GAMM | . . . . . | E.GKTT | .CSLCSRLRRGILY | .TFADEI | GATKMALGHHRDDIET | FFLNMFY | GTLKAMPKLL |
| tr|AOA1H2ES15|AOA1H2ES15\_9PSED | . . . . . | E.GKTT | .CSLCSRLRRGNLY | .TFADEI | GANKALGHHRDDIVET | FFLNMFY | GNLKAMPKLL |
| tr|AOA177QRA8|AOA177QRA8\_9GAMM | . . . . . | E.GKTTY | .CSLCSRLRRGILY | .RYAEEQ | GYNKVALGHHRDDMIR | TLLMSIFYN | GEIKSMPPKLL |
| tr|AOA254Q4L9|AOA254Q4L9\_9PROT | . . . . . | K.GATF | .CSLCSRLRRGILY | .DYAHNL | GFTKMALGHHRDDVVT | TLLNMFY | AGQTAMPKLL |
| tr|AOA2E6SWN3|AOA2E6SWN3\_9FLAO | . . . . . | E.GKTM | .CSLCSRLRRGILY | .SVAEEL | GCKNVALGHHRDDIVET | FFLNMFY | SGRIETMPKKY |
| tr|AOA2E9AK57|AOA2E9AK57\_9GAMM | . . . . . | E.GKTM | .CGLCSRLRRGILY | .RYAREN | GFNRIALGHHRDDIVET | MFLNMFH | GARMAGMPKLL |
| tr|AOA2D7F0H7|AOA2D7F0H7\_9GAMM | . . . . . | E.GKTTY | .CGWCSRFRRGILY | .KFAQRQ | GYNKIALGHHRDDIVET | FFLNLFY | GKKMKTMPKLL |
| tr|AOA2E1W4P8|AOA2E1W4P8\_9FLAO | . . . . . | E.GKTM | .CSLCSRLRRGILY | .SVAEEL | GCKNVALGHHRDDIMET | LFLNMFY | SGRIETMPKKY |
| tr|AOA2E5RQ39|AOA2E5RQ39\_9FLAO | . . . . . | E.GKTM | .CSLCSRLRRGILY | .SVAEEL | GCKNIALGHHRDDIMET | LFLNMFY | SGRIETMPKKY |
| tr|AOA2E2TWY6|AOA2E2TWY6\_9GAMM | . . . . . | E.GKTTY | .CSLCSRLRRGILY | .NYAEKN | GFNKIALGHHKDDLAES | LMSIFYQ | GEIISMPKLL |
| tr|AOA2D7KKV3|AOA2D7KKV3\_9GAMM | . . . . . | E.GKTM | .CGLCSRLRRGILY | .RFAEDN | GFNRIALGHHRDDIVET | LFLNMFY | SGRLKAMPKLL |
| tr|AOA148NAU8|AOA148NAU8\_9GAMM | . . . . . | E.GKTT | .CGLCSRLRRGVLY | .GFAEEH | GFTKIALGHHRDDIET | FFLNLFY | GGRKLKAMPKLL |
| tr|AOA0C1N9Q3|AOA0C1N9Q3\_9CYAN | . . . . . | E.GKTT | .CSLCSRLRRAILY | .RVASEE | GATKVALGHHRDDIET | LFLNMFY | AGKLLKAMPKLL |
| tr|AOA098LEV0|AOA098LEV0\_9BACT | . . . . . | E.GKTL | .CTLCSRLRRGILY | .TAAAKL | GATKIALGHHRDDIET | FFLNLFY | GCKMEAMPKPY |
| tr|AOA1Q7Z4V3|AOA1Q7Z4V3\_9DELT | . . . . . | E.GKTA | .CSVCSLRRRGILY | .SAAARQL | GCTKIALGHHRDDIVES | LLSMLF | TGKLRSMPPRL |
| tr|H5SHT9|H5SHT9\_9GAMM | . . . . . | E.GKTT | .CGLCSRLRRGILY | .GFAEAH | GFTKIALGHHRDDIVET | FFLNLFY | GGRKLKAMPKLL |
| tr|I4CAC3|I4CAC3\_DESTA | . . . . . | A.GTNP | .CSFCSRLRRGILY | .SYAARE | GWNKIALGHHRDDIVET | FFLNLFN | GQVKGMSPKLL |
| tr|AOA2E8MZV2|AOA2E8MZV2\_9RICK | . . . . . | G.GKTTY | .CSLCSRLRRGVLY | .DLARKF | GCKNVALGHHRDDIET | LFLMNTFY | SGQLASMAPHY |
| tr|AOA140K5Z4|AOA140K5Z4\_9CYAN | . . . . . | E.GKTM | .CSLCSRLRRGILY | .RVASEE | GATKIALGHHRDDIVET | LFLNMFH | GTLKAMPKLL |
| tr|AOA1Z9WCJ2|AOA1Z9WCJ2\_9GAMM | . . . . . | E.GKTF | .CGLCSRLRRGILY | .NYAESIG | GANKIALGHHRDDIVET | LFLNMFY | GCKLKAMPKLL |
| tr|V6LCA2|V6LCA2\_9EUKA | . . . . . | P.GTRT | .CSFCARLRRLGSL | .TYCKSQN | INKIALGHHRDDIVES | MLMSQLQ | NGRLWTQAPIY |
| tr|AOA2W1JZL5|AOA2W1JZL5\_9CYAN | . . . . . | E.GKTM | .CGLCSRLRRGILY | .RVANEE | GATKIALGHHRDDIET | LFLNMFY | AGRLKAMPKLL |
| tr|AOA2E3WDX3|AOA2E3WDX3\_9PROT | . . . . . | E.GKTF | .CSLCSRLRRGILY | .NHAEHM | GFNKIALGHHDDAIET | LFLNQFY | SGKISMPVVL |
| tr|AOA2E5HLE3|AOA2E5HLE3\_9DELT | . . . . . | P.NQTT | .CSLCSRLRRGILY | .NOQAHL | GATKIALGHHRDDIET | LFLNLFY | SGQLKAMPKLL |
| tr|AOA2W5TG65|AOA2W5TG65\_9DELT | . . . . . | P.GQTT | .CSLCSRLRRGILY | .TAAVDM | GCTKIALGHHRDDIET | LFLNQFF | AGTTATMPKLL |
| tr|AOA1G0GKM6|AOA1G0GKM6\_9GAMM | . . . . . | E.GQTY | .CSLCSRLRRGILY | .RYAAEK | GFNKIALGHHRDDIET | LFLMSILY | NGEIRSMPPKLL |
| tr|AOA150AGP8|AOA150AGP8\_9BACT | . . . . . | E.GKTM | .CSLCSRLRRGILY | .TAAEEL | GVTKIALGHHRDDIVET | LFLNMFY | SGKLEAMPPIY |
| tr|AOA1S1YYD9|AOA1S1YYD9\_9BACT | . . . . . | E.GKTM | .CSLCSRLRRGILY | .TAAEEL | GVTKIALGHHRDDIET | LFLNMFY | SGKLEAMPPIY |
| tr|A5EXQ4|TTCA\_DICNV | . . . . . | A.GKTM | .CSLCSRLRRGILY | .RYAEEH | GITKIALGHHKDDIET | FFLNLFY | TGRLKAMPKLL |
| tr|AOA1G0XP48|AOA1G0XP48\_9GAMM | . . . . . | E.GKTTY | .CSLCSRLRRGILY | .KYAEEH | NYNKIALGHHRDDIET | LFLMSLYN | GEIKSMPPKLL |
| tr|AOA1G0L2E0|AOA1G0L2E0\_9GAMM | . . . . . | A.PKTTY | .CSLCSRLRRGVLY | .TYAKEN | HFTKIALGHHRDDIES | LFLMSALY | SGEIRTMPKLL |
| tr|AOA1G0GM68|AOA1G0GM68\_9GAMM | . . . . . | E.GQTY | .CSLCSRLRRGILY | .RYAEEK | GFNKIALGHHRDDIET | LFLMSILYN | NGEIRSMPPKLL |
| tr|AOA1B8TZZ0|AOA1B8TZZ0\_9FLAO | . . . . . | E.GKTT | .CSLCSRLRRGILY | .EAAKDL | GCKNIALGHHRDDIET | FFLNLFY | AGKMETMPKPF |
| tr|AOA2D7K8M6|AOA2D7K8M6\_9FLAO | . . . . . | A.GKTM | .CGLCSRLRRGILY | .DCAREL | GCKNIALGHHRDDIET | FFLNLFY | SGKMETMPKPY |
| tr|AOA2M9DVU6|AOA2M9DVU6\_9DELT | . . . . . | E.GKTM | .CGLCSRLRRGILY | .RHAAAG | GMTKIALGHHRDDMVET | LFLNMFH | SGRIKGMPPKLL |
| tr|AOA2E2WLC4|AOA2E2WLC4\_9GAMM | . . . . . | E.GKTY | .CSLCSRLRRGILY | .RFAEEH | GFNKIALGHHRDDIET | LFLMSLY | SGQVKSMPPKLL |
| tr|AOA1J0KT95|AOA1J0KT95\_9GAMM | . . . . . | E.GKTT | .CGLCSRLRRGILY | .DFAEEH | NVTKIALGHHRDDIET | FFLNLFY | NGSIKSMPPKLL |
| tr|AOA1Q2SN26|AOA1Q2SN26\_9GAMM | . . . . . | E.GKTT | .CSLCSRLRRGILY | .GTAELK | GATKIALGHHRDDIATL | FFLNMFH | GTLKAMPKLL |
| tr|AOA1F9PKZ9|AOA1F9PKZ9\_9DELT | . . . . . | P.GSSY | .CSICARLFRGALY | .GVAAGSL | GCKNIALGHHSDDFIET | LFLNQFF | VGSLKSMASAM |
| tr|AOA2U2J834|AOA2U2J834\_9FLAO | . . . . . | E.GKTT | .CSLCSRLRRGILY | .EAAKDL | GCKNIALGHHRDDIET | FFLNLFY | AGKLETMPKPF |
| tr|U9W6P5|U9W6P5\_9CYAN | . . . . . | E.GKTM | .CGLCSRLRRGILY | .RVASEE | GVTKIALGHHRDDIVET | LFLNMFH | GGRKLKAMPKLL |
| tr|AOA1E7HZ03|AOA1E7HZ03\_9DELT | . . . . . | P.GTSTY | .CAFCSRLRRGALH | .TOAEKL | GCKNIALGHHRDDIET | LFLNQFY | GGLTAAKSAKL |
| tr|A2U287|A2U287\_9FLAO | . . . . . | E.GKTTY | .CSLCSRLRRGILY | .EAAKDL | GCKNIALGHHRDDIET | FFLNMFY | SGKLETMPKPF |
| tr|AOA1G0MC79|AOA1G0MC79\_9DELT | . . . . . | P.GSSY | .CSICARLFRGALY | .EVAQDM | GCKNIALGHHQDDFIET | LFLNQFF | VGSLKSMASAM |
| tr|AOA0M9CHH7|AOA0M9CHH7\_9FLAO | . . . . . | E.GKTT | .CSLCSRLRRGILY | .EAAKDL | GCKNIALGHHKDDIET | FFLNLFY | SGKLETMPKPF |
| tr|AOA1V5JXW0|AOA1V5JXW0\_9DELT | . . . . . | DPKSP | .CALCSRLRRGILY | .RLQDEL | GASALGHHKDDIVET | LFLRTFY | TGQLGAMPKRR |
| tr|AOA2E1TKX3|AOA2E1TKX3\_9PROT | . . . . . | E.GKTM | .CGLCSRLRRGILY | .KAAEHL | GANKIALGHHQDDIET | FFLNLFY | GQIKTMPKLL |
| tr|AOA2E4SAB6|AOA2E4SAB6\_9FLAO | . . . . . | E.GKTM | .CSLCSRLRRGILY | .DKAREL | GCKNIALGHHRDDIET | FFLNLFY | SGKMEAMPKPY |
| tr|AOA258F7U7|AOA258F7U7\_9FLAO | . . . . . | E.GKTT | .CSLCSRLRRGILY | .EAAARDL | GCKNIALGHHKDDIET | FFLNLFY | AGKMETMPKPF |
| tr|AOA0A8WQ54|AOA0A8WQ54\_9DELT | . . . . . | E.GSSY | .CSICARLFRGALY | .ELAQRFL | GCKNIALGHHKDDIET | FFLNQFF | VGSLKSMASAM |
| tr|X5JQR9|X5JQR9\_9NOST | . . . . . | E.GKTM | .CGLCSRLRRGILY | .RVATQE | GATKIALGHHRDDMVET | LFLNMFH | GGRKLKAMPKLL |
| tr|AOA1Z8QQJ8|AOA1Z8QQJ8\_9BACT | . . . . . | P.GKSY | .CSLCSRLRRDILY | .DSARNV | GCKNIALGHHREDDVET | FMLNLFY | SGKLGSMPPHY |
| tr|AOA2H1E976|AOA2H1E976\_9FLAO | . . . . . | E.GKTT | .CSLCSRLRRGILY | .EAAKDL | GNKIALGHHRDDIET | FFLNLFY | SGKLETMPKPF |
| tr|AOA1Z4RSZ1|AOA1Z4RSZ1\_9CHRO | . . . . . | E.GKTM | .CSLCSRLRRGILY | .RVAEED | GINKIALGHHRDDIVET | LFLNMFY | GGLTSMPPKLL |
| tr|AOA1M7N9R99|AOA1M7N9R99\_9FLAO | . . . . . | E.GKTT | .CSLCSRLRRGILY | .EAAKDL | GCKNIALGHHRDDIET | FFLNLFY | AGKMETMPKPF |
| tr|AOA1G0HBX4|AOA1G0HBX4\_9GAMM | . . . . . | E.GQTY | .CSLCSRLRRGILY | .HYAEEH | GFNKIALGHHRDDIET | LFLMSLYN | NGEIRSMPPKLL |
| tr|AOA1G0WYX2|AOA1G0WYX2\_9GAMM | . . . . . | E.GEITY | .CSLCSRLRRGILY | .RYAEEH | GFNKIALGHHRDDIET | LFLMSIFYN | NGEIRSMPPKLL |
| tr|AOA2E2NQ57|AOA2E2NQ57\_9DELT | . . . . . | E.GKTT | .CSLCSRLRRGILY | .NAAVEL | GCTKIALGHHRDDIET | LFLNLFY | GGLKAMPKRL |
| tr|AOA2E7CJC5|AOA2E7CJC5\_9PROT | . . . . . | A.GKTF | .CSLCSRLRRGILY | .NAAVEL | GCTKIALGHHKDDIET | LFLMNL | YSGVMTMPKLL |
| tr|AOA1L4BT26|AOA1L4BT26\_9GAMM | . . . . . | E.GKTTY | .CSLCSRLRRGNLY | .RYAKEH | KMDKILGHHRDDIES | LFLMSLYQ | GQIKSMPPKLL |
| tr|AOA1X1BF32|AOA1X1BF32\_9GAMM | . . . . . | E.GKTTY | .CSLCSRLRRGNLY | .RYAKEH | KMDKILGHHRDDIET | LFLMSLYQ | GQIKSMPPKLL |
| tr|AOA1J0KVR2|AOA1J0KVR2\_9GAMM | . . . . . | E.GKTTY | .CSLCSRLRRGNLY | .RYAKDH | NMDKIVILGHHRDDIES | LFLMSLYQ | GQIKSMPPKLL |
| tr|AOA2J6JE04|AOA2J6JE04\_9DELT | . . . . . | P.GSSY | .CAFCSRLRRGVLY | .TVAQEI | GCKNIALGHHKDDFIET | LFLNQFY | VGTLGAMSAKL |
| tr|AOA1F8V7G5|AOA1F8V7G5\_9COXI | . . . . . | E.GKIY | .CSLCSRLRRGILY | .RYAEEQ | GFNKIALGHHRDDIET | LFLMSIFYN | GQIKSMPPKLL |
| tr|AOA1G1FBX6|AOA1G1FBX6\_9BACT | . . . . . | E.GERP | .CSLCSRLRRGILY | .TOARVS | GCKNVALGHHRDDIET | LFLNQFY | GGRKLKAMPKLL |
| tr|AOA1G0E7F6|AOA1G0E7F6\_9GAMM | . . . . . | P.GKTF | .CSLCSRLRRGILY | .RYAKEH | GFKKIALGHHRDDIES | LFLMSVLY | SGEIRSQPPKLL |
| tr|AOA2E2TQ02|AOA2E2TQ02\_9BACT | . . . . . | P.GKSY | .CSLCSRLRRGILY | .DSARNF | GCKNIALGHHREDDVET | FMLNLFY | SGKLGSMPPHY |
| tr|AOA1G0EEH5|AOA1G0EEH5\_9GAMM | . . . . . | P.GKTY | .CSLCSRLRRGVLY | .TYAQHD | FKKIALGHHRDDIES | LFLMSLYQ | GQIKSMPPKLL |
| tr|AOA1F3U044|AOA1F3U044\_9PROT | . . . . . | K.DGVF | .CSLCSKLRRAILY | .DFAFDH | FTKMALGHHRDDIVET | SMNLFY | TGQLSTMPKLL |
| tr|AOA2T5R4N6|AOA2T5R4N6\_9DELT | . . . . . | P.GSSF | .CSICARLFRGVLY | .TLAQFN | GCKNIALGHHKDDVET | LFLNQFF | VGSLKAMAASAM |
| tr|AOA2D4SSF2|AOA2D4SSF2\_9DELT | . . . . . | T.GKATY | .CSLCSRLRRGILY | .NAAVDL | GCKNIALGHHRDDIET | LFLNLFY | GQIKSMPPKLL |
| tr|AOA2N6FFT5|AOA2N6FFT5\_9DELT | . . . . . | P.GTASY | .CSFCARLRRGILY | .TLAQDL | GCKNIALGHHKDDIET | LFLNQFY | VGSLKAMAASAM |
| tr|FOXZP6|FOXZP6\_AURAN | . . . . . | A.GKSY | .CSLCSRLRRGILY | .THAERR | GAGVALGHHRDDALET | LFLNMFH | GQIKSMPPKLL |



|                                |           |         |                |               |              |            |          |              |            |
|--------------------------------|-----------|---------|----------------|---------------|--------------|------------|----------|--------------|------------|
| tr A0A1G0MSC8 A0A1G0MSC8_9DELT | . . . . . | P. GSSY | CSICSRLLRKGALY | .ETAQTL       | CNKIALGHHQ   | DDFIETLL   | LNQFFV   | GSLSKMSASM   |            |
| tr A0A099Y2Q8 A0A099Y2Q8_9FLAO | . . . . . | E. GKTT | CSLCSRLRRGTL   | .EAAKDL       | CNKIALGHHR   | NDIILETF   | LNFFFA   | GKMETMPPKF   |            |
| tr A0A1F3QP09 A0A1F3QP09_9BACT | . . . . . | E. GKTT | CSLCSRLRRGRL   | .TTAEELK      | CNKIALGHHR   | DDFIETFL   | LNFFFA   | GKLEAMPPKY   |            |
| tr A0A2N6FI42 A0A2N6FT42_9DELT | . . . . . | P. GSSY | CAF CARLRRCGLY | .TMADEL       | CNKIALGHHL   | DDFIETLL   | LNQFFV   | GSLKGMSPKL   |            |
| tr A0A2A4YJW7 A0A2A4YJW7_9FLAO | . . . . . | E. GKST | CSLCSRMRRGRL   | .KTAKEI       | GANKIALGHHR  | DDIETFL    | LNLFSS   | GKLEAMPPKF   |            |
| tr A0A1G0H8I8 A0A1G0H8I8_9GAMM | . . . . . | E. GETY | CSLCSRLRRGNIY  | .RYAEEN       | GYNKVALGHHR  | DDIIQTLT   | MSILYS   | GQIKSMPPKL   |            |
| sp Q3A6S7 TTCA_PELCD           | . . . . . | P. GSSF | CAF CARLRRCVLY | .SVATEL       | CNKIALGHHL   | DDFVETLL   | LNQFVY   | GTLAAMSPKL   |            |
| tr A0A1H3VRW5 A0A1H3VRW5_9DELT | . . . . . | P. GTSY | CAF CARLRRCGLY | .SQAQEH       | CNKVALGHHL   | DDVIETLL   | LNQFYA   | GTLSAMSAKL   |            |
| sp Q6MLE7 TTCA_BDEBA           | . . . . . | GGTF    | CSLCSRLRRRALY  | .DFAHAN       | GFTKIALGHHR  | DDVVHTAL   | LNMFYV   | GTTAAMPKKL   |            |
| tr A0A2N6E4U5 A0A2N6E4U5_9DELT | . . . . . | P. GSSY | CSF CARLRRCVLY | .SLADEL       | CNKIALGHHL   | DDFIETLL   | LNQFVY   | GTLAAMSPKL   |            |
| tr A0A1E7IG50 A0A1E7IG50_9DELT | . . . . . | P. GSSY | CAF CARLRRCGLY | .TOATELD      | CNKIALGHHL   | DDFIETLL   | LNQFYA   | GTLAAMSPKL   |            |
| tr A0A1G0GSV6 A0A1G0GSV6_9GAMM | . . . . . | E. GQTY | CSLCSRLRRGNIY  | .RYAEEN       | NFNKIALGHHR  | DDIIQTLT   | MSILYS   | GQIKSMPPKL   |            |
| tr A0A2M7ZW17 A0A2M7ZW17_9GAMM | . . . . . | E. GQTY | CSLCSRLRRGNIY  | .RYAEDN       | GYNKVALGHHR  | DDIIQTLT   | MSVLYS   | GQIKSMPPKL   |            |
| sp Q2A3F9 TTCA2_FRATH          | . . . . . | E. GKTT | CGLCSRMRRGILY  | .DFAEEN       | NVTKVALGHHR  | DDIIEFTF   | LNLFYNG  | GSIKAMPTKL   |            |
| tr I2AZ39 I2AZ39_FRANT         | . . . . . | D. GKTT | CGLCSRMRRGILY  | .DFAEEN       | NI TKIALGHHR | DDIIEFTF   | LNLFYNG  | GSIKAMPAKL   |            |
| tr A0A097EM44 A0A097EM44_9GAMM | . . . . . | E. GKTT | CGLCSRMRRGILY  | .DFAEEN       | SVTKIALGHHR  | DDIIEFTF   | LNLFYNG  | GSIKAMPAKL   |            |
| tr A0A1G0GGE7 A0A1G0GGE7_9GAMM | . . . . . | E. GETY | CSLCSRLRRGNIY  | .RYAEEN       | GNKIALGHHR   | DDIIHTLL   | MSIFYA   | GQIKSMPPKL   |            |
| tr A0A0B5BJ72 A0A0B5BJ72_9DELT | . . . . . | P. GSSY | CSICARLKRKGLY  | .TLAQRF       | CNKIALGHHL   | DDFVETLL   | LNQFVY   | GTLAAMSPRM   |            |
| sp Q39QC5 TTCA_GEOMG           | . . . . . | P. GSSY | CSICARLKRKGVLY | .TLAQQH       | CNKIALGHHL   | DDFVETLL   | LNQFFV   | GTTLKAMAPRM  |            |
| tr A0A0C1TS20 A0A0C1TS20_9DELT | . . . . . | P. GSSY | CSICARLKRKGVLY | .TLAQKL       | CNKIALGHHL   | DDFVETLL   | LNQFFV   | GTTLKAMAPRM  |            |
| tr A0A1G5EMY4 A0A1G5EMY4_9DELT | . . . . . | D. GSKM | CALCARLRRGALY  | .AHAAAN       | GFSHALGHHM   | DDVMVETL   | LNLFYNG  | GMMKGMPPKL   |            |
| tr A0A1G1H8I4 A0A1G1H8I4_9BACT | . . . . . | P. GDSP | CSLCSRLRRGRLY  | .TOAAEL       | GCAKIALGHHR  | DDFIETLL   | LNQFYNG  | GKIKAMSPKL   |            |
| tr A0A1M6IOE4 A0A1M6IOE4_MALRU | . . . . . | P. NSSY | CAF CARLRRCGLY | .TLADEL       | CNKIALGHHL   | DDFIETLL   | LNQFYNG  | GTLAAMSPKL   |            |
| sp A9KE14 TTCA_COXBN           | . . . . . | A. GKTY | CSLCSRLRRGILY  | .RYAEEQ       | GFSKIALGHHR  | DDIIQTLT   | MSVLYNG  | QIRSMPPKL    |            |
| tr E8WQ56 E8WQ56_GEOS8         | . . . . . | P. NSSY | CSICARLKRGTLY  | .TLAQQM       | CNKIALGHHM   | DDIIEFTL   | LNQFFV   | GSLSKMAPSM   |            |
| tr A0A1G0M695 A0A1G0M695_9DELT | . . . . . | A. NSSY | CSICARLKRKGLY  | .GLAQRY       | CNKIALGHHM   | DDFIETLL   | LNQFFV   | GSLSKMAPSM   |            |
| tr A0A217SED0 A0A217SED0_9FLAO | . . . . . | E. GKTT | CSLCSRLRRGTL   | .EAAKDL       | CNKIALGHHR   | NDIILETF   | LNFFFA   | GKLEAMPPKF   |            |
| tr K9RJ13 K9RJ13_9CYAN         | . . . . . | E. GKTM | CSLCSRLRRGILY  | .RVAREESA     | TKVALGHHR    | DDIVETLF   | LNMFHS   | SRSLKAMPPKL  |            |
| tr A0A1V5GZG2 A0A1V5GZG2_9DELT | . . . . . | DPEKSP  | CALCSRLRRGRLY  | .TLAQER       | GVSSIALGHHL  | DDIIEFTF   | LRFCFY   | GTGICAMAPAR  |            |
| tr A0A1Q3SMU5 A0A1Q3SMU5_9GAMM | . . . . . | E. GSTY | CSLCSRLRRGILY  | .TYAEQH       | GYNKIALGHHR  | DDIIETLL   | MSIFYNG  | QIRSMPPKL    |            |
| tr A0A192X0U1 A0A192X0U1_9BACT | . . . . . | P. GGPN | E. GDAY        | CRVCSRLRRGILY | .DAAEKL      | CNKIALGHHR | DDALETLL | MNLFSS       | GKLOAMPASY |
| tr A0A1E7HUG3 A0A1E7HUG3_9DELT | . . . . . | P. DSSY | CAF CARLRRCVLY | .AVADEL       | CNKIALGHHH   | DDFIETLL   | LNQFFV   | GSLSKMAPSKL  |            |
| tr A0A2G1ZVL9 A0A2G1ZVL9_9COXI | . . . . . | E. GKTY | CSLCSRLRRGNIY  | .RYAEDN       | GFNKIALGHHR  | DDIIQTLT   | MSILYNG  | QICSMPPKL    |            |
| tr A0A258VXM1 A0A258VXM1_9PROT | . . . . . | E. GKAY | CTLCSKFRRAILY  | .DHAATSL      | GISKIALGHHR  | DDIIEFTL   | LNMFYNG  | GHSISMPPKL   |            |
| tr A0A1G9TDQ4 A0A1G9TDQ4_9DELT | . . . . . | P. GSKY | CSF CARLRRCVLY | .TLADEL       | CNKIALGHHL   | DDFIETLL   | LNQFYNG  | GTLAAMSPKL   |            |
| tr A0A1L3GPX7 A0A1L3GPX7_9DELT | . . . . . | P. GSSY | CSF CARLRRCVLY | .SVMDL        | CNKIALGHHH   | DDFIETLL   | LNQFFV   | GTTLKAMSPKL  |            |
| tr A0A2W4KM9 A0A2W4KM9_9BACT   | . . . . . | P. RKSV | CSF CARLRRCALY | .TYAEH        | GYNKIALGHH   | DDIETVL    | NMNFYS   | GSLSKMAPHY   |            |
| tr B7G797 B7G797_PHATC         | . . . . . | P. GKSF | CTVCSRLRRGILY  | .STALTTL      | CNKIMLGHHH   | DDCLETLL   | LNMIHT   | GQTKAMPARY   |            |
| sp A5GBX4 TTCA_GEOUR           | . . . . . | P. DSSY | CSICARLKRKGVLY | .GLAQRY       | CNKIALGHHM   | DDFIETLL   | LNQFFV   | GSLSKMAPSM   |            |
| sp B9M1Y2 TTCA_GEODF           | . . . . . | L. DSSY | CSICARLKRKGLY  | .ALAQHN       | CNKIALGHHM   | DDFIETLL   | LNQFFV   | GALKAMAPGM   |            |
| tr A0A2N6BQY4 A0A2N6BQY4_9DELT | . . . . . | P. GTTY | CSF CARLRRCGLY | .TFATEHRY     | NKIALGHHH    | DDIIEFTL   | MAQFFT   | GVISMPVVL    |            |
| tr A0A1W9UI33 A0A1W9UI33_9DELT | . . . . . | P. GSSY | CAF CARLRRCALY | .TCA SRLK     | SKIALGHHL    | DDIETLL    | LNQFYS   | GTIAGMSPKL   |            |
| tr Q1K2G5 Q1K2G5_DESA6         | . . . . . | P. GSSY | CAF CARLRRCALY | .TTAQKL       | CNKVALGHHL   | DDHIEFTL   | LNQFYS   | GTISAMSPKL   |            |
| tr A0A2N6ESB2 A0A2N6ESB2_9DELT | . . . . . | P. GSSY | CAF CARLRRCALY | .TTAAQL       | CNKVALGHHL   | DDHIEFTL   | LNQFYS   | GTISAMSPKL   |            |
| tr A0A1Y6BUV3 A0A1Y6BUV3_9PROT | . . . . . | E. GKAF | CGLCSRLRRGILY  | .NYAAEH       | GFNKIALGHHR  | DDIIEFTL   | LNMFNG   | NRISMPKKL    |            |
| tr A0A2E3NDA3 A0A2E3NDA3_9DELT | . . . . . | P. GKSY | CGLCSRMRRGALY  | .AFAAEQ       | GFTKIALGHHR  | EDNLETF    | LNLFSS   | GVGVGSMPPKL  |            |
| tr A0A2D7NNW1 A0A2D7NNW1_9BACT | . . . . . | P. GKSY | CSLCSRLRRGILY  | .DSARKFN      | CNKIALGHHR   | DDIVLETF   | MNLFSS   | GQLSMPPKL    |            |
| tr A0A0S8BFY2 A0A0S8BFY2_9PROT | . . . . . | D. GKTY | CSLCSRLRRGILY  | .RYAKDH       | GYNKVALGHHR  | DDIIETLL   | MSILYS   | GQIRSMPPKL   |            |
| tr A0A2E8HZL3 A0A2E8HZL3_9PROT | . . . . . | E. GKTY | CGLCSRLRRGILY  | .NYAADN       | GYSKIALGHHR  | DDMNLETF   | LNMFYNG  | GRISMPKKL    |            |
| tr A0A2G2L3Z8 A0A2G2L3Z8_9GAMM | . . . . . | E. GKTT | CSLCSRLRRGILY  | .NWA EKN      | NI TKIALGHHR | DDMVETLF   | LNMFSS   | GKLSMPPAKL   |            |
| tr A0A2D4RZ44 A0A2D4RZ44_9GAMM | . . . . . | E. GRIT | CGLCSRLRRGTL   | .AFADII       | GCTKVALGHHR  | DDIVETLF   | LNLFHG   | GAFAAMPKKL   |            |
| tr A0A0D6ETW7 A0A0D6ETW7_9PROT | . . . . . | S. GKTT | CSLCSRLRRGILY  | .RTAKELN      | INKIALGHHR   | DDIVETLF   | LNMFSS   | GSKLKAMPPKL  |            |
| tr A0A2N6G8V8 A0A2N6G8V8_9GAMM | . . . . . | E. GKTT | CSLCSRLRRGILY  | .RVASEL       | GASKIALGHHR  | DDIVETLF   | LNMFSS   | GAKLKAMPPKL  |            |
| tr A0A2H9SMD1 A0A2H9SMD1_9GAMM | . . . . . | E. GKTY | CSLCSRLRRGILY  | .RYAE EK      | GFNKIALGHHR  | DDIIRTL    | MSIFYNG  | QIRSMPPKL    |            |
| tr A0A2E9JDQ9 A0A2E9JDQ9_9GAMM | . . . . . | E. GKTY | CALCSRLRRGIFY  | .NYAESI       | GADKIALGHHR  | DDIVETLF   | LNMFSS   | GKLSKAMPKKL  |            |
| tr A0A2E6EJ87 A0A2E6EJ87_9RICK | . . . . . | E. DATY | CSLCSRLRRGILY  | .NAAEEL       | GSKIALGHHG   | DDAVETLF   | MNMFFG   | GTQLKTPAWL   |            |
| tr A0A2E7CSE6 A0A2E7CSE6_9FLAO | . . . . . | E. GKTM | CSLCSRLRRGTL   | .DFA RGN      | HCKNKIALGHHR | EDDLETF    | LNLFSS   | GKMETMPPKY   |            |
| tr A0A2I2DP53 A0A2I2DP53_9FLAO | . . . . . | E. GKTT | CSLCSRLRRGTL   | .EAAKNL       | KCNKIALGHHR  | NDIIEFTF   | LNFFFA   | GKLEMTMPKF   |            |
| tr A0A1M6CGK2 A0A1M6CGK2_9FLAO | . . . . . | E. GKTT | CSLCSRLRRGTL   | .EAAKDL       | CNKIALGHHR   | NDIILETF   | LNFFFA   | GKLEMTMPKF   |            |
| tr A0A2E4V0Z3 A0A2E4V0Z3_9FLAO | . . . . . | E. GKTM | CSLCSRLRRGTL   | .DLARDLN      | CNKIALGHHM   | DDIIEFTY   | LNLFSS   | GKMEAMPPKY   |            |
| tr A0A2S7WWD7 A0A2S7WWD7_9FLAO | . . . . . | E. GKTT | CSLCSRLRRGTL   | .EAAKDL       | CNKIALGHHR   | NDIILETF   | LNFFSS   | GKLEMTMPKF   |            |
| tr A0A1Y0MU77 A0A1Y0MU77_9FLAO | . . . . . | E. GKTT | CSLCSRLRRGTL   | .EAAKDL       | CNKIALGHHH   | KNDIIEFTF  | LNFFFA   | GKMETMPPKF   |            |
| tr A0A1B8U105 A0A1B8U105_9FLAO | . . . . . | E. GKTT | CSLCSRLRRGTL   | .EAAKDL       | CNKIALGHHR   | NDIILETF   | LNFFFA   | GKMETMPPKF   |            |
| tr A0A2E3Y167 A0A2E3Y167_9FLAO | . . . . . | X. GKTM | CSLCSRLRRGTL   | .DEARELN      | CNKIALGHHM   | DDIIEFTY   | LNLFSS   | GKLEAMPPKY   |            |
| tr A0A1L4BS83 A0A1L4BS83_9GAMM | . . . . . | E. GKTT | CGLCSRMRRGILY  | .DFAEEN       | GCTKIALGHHR  | DDIIEFTF   | LNIFYNG  | GTIKAMPPKL   |            |
| tr A0A246Q4W5 A0A246Q4W5_9BURK | . . . . . | E. GKTM | CSLCSRLRRGILY  | .RVADEL       | GCTKIALGHHR  | DDILGTFF   | LNMFYNG  | GKLSKAMPKKL  |            |
| tr W8X665 W8X665_CASDE         | . . . . . | E. GKTT | CSLCSRLRRGILY  | .RVASEL       | GATKIALGHHR  | DDILATFF   | LNLFYNG  | GRMKAMPKKL   |            |
| tr A0A2U1CQ90 A0A2U1CQ90_9BURK | . . . . . | E. GKTM | CSLCSRMRRALY   | .RVASEL       | GATKIALGHHR  | DDIIATFF   | LNLFYNG  | GRMKAMPKKL   |            |
| tr WOPLA6 WOPLA6_9BURK         | . . . . . | E. GKTT | CSLCSRLRRGILY  | .RVASEL       | GATKIALGHHR  | DDIIATFF   | LNLFYNG  | AAKLKSMPKKL  |            |
| tr A0A0K8P592 A0A0K8P592_IDESA | . . . . . | E. GQTM | CSLCSRLRRGILY  | .RVASEL       | GATKIALGHHR  | DDMVQTLF   | MNMFFG   | GRMKGMPPKL   |            |
| tr A0A225MGV7 A0A225MGV7_9BURK | . . . . . | E. GKTM | CSLCSRLRRGILY  | .RVASEL       | GATKIALGHHR  | DDILGTFF   | LNLFYNG  | GRMKAMPKKL   |            |
| tr A0A1W6Z3Y4 A0A1W6Z3Y4_9BORD | . . . . . | O. GKTM | CSLCSRLRRGILY  | .RVASEL       | GATKIALGHHR  | DDILGTFF   | LNLFYNG  | GKLSKAMPKKL  |            |
| tr A0A2M9GTQ4 A0A2M9GTQ4_9BURK | . . . . . | E. GKTM | CSLCSRLRRGILY  | .RVASEL       | GATKIALGHHR  | DDILGTFF   | LNLFYNG  | GKLSKAMPKKL  |            |
| tr A0A261TJ55 A0A261TJ55_9BORD | . . . . . | E. GKTM | CSLCSRLRRGILY  | .RVASEL       | GATKIALGHHR  | DDIIATFF   | LNLFYNG  | GKTKAMPKKL   |            |
| tr A0A1M5TG54 A0A1M5TG54_9BURK | . . . . . | E. GKTM | CSLCSRLRRGILY  | .RVASEL       | GATKIALGHHR  | DDILGTFF   | LNLFYNG  | GRMKAMPKKL   |            |
| tr V8FRL7 V8FRL7_9BURK         | . . . . . | E. GKTT | CSLCSRLRRGILY  | .RVANEL       | GCTKIALGHHR  | DDIIATFF   | LNLFYNG  | AAKLKTMPKKL  |            |
| tr A0A261S3A1 A0A261S3A1_9BORD | . . . . . | E. GKTM | CSLCSRLRRGILY  | .RVASEL       | GCTKIALGHHR  | DDILGTFF   | LNMFYNG  | GKLSKAMPKKL  |            |
| tr A0A157SL10 A0A157SL10_9BORD | . . . . . | E. GKTM | CSLCSRLRRGILY  | .RVASEL       | GATKIALGHHR  | DDILGTFF   | LNLFYNG  | GKLSKAMPKKL  |            |
| tr A0A261W8G2 A0A261W8G2_9BORD | . . . . . | E. GKTM | CSLCSRLRRGILY  | .RVASEL       | GATKIALGHHR  | DDIIATFF   | LNLFYNG  | GKLSKAMPKKL  |            |
| tr F4GTM2 F4GTM2_PUSTT         | . . . . . | E. GKTT | CSLCSRLRRGILY  | .RVASEL       | GATKIALGHHR  | DDILGTFF   | LNLFYNG  | GRMKAMPKKL   |            |
| tr A0A1F4NDN1 A0A1F4NDN1_9BURK | . . . . . | E. GKTM | CSLCSRLRRGILY  | .RVAKEL       | GCTKIALGHHR  | DDIIQTLF   | LNMFSS   | GAKLKGMPPAKL |            |
| tr A0A1H8E7G5 A0A1H8E7G5_9BURK | . . . . . | E. GKTM | CSLCSRLRRGILY  | .TVARRL       | CNKIALGHHR   | DDIVATFF   | LNMFSS   | GAKLKSMPPKL  |            |
| tr A0A2X4JTT9 A0A2X4JTT9_BORPP | . . . . . | E. GKTM | CSLCSRLRRGILY  | .RVASEL       | GATKIALGHHR  | DDILGTFF   | LNLFYNG  | GKLSKAMPKKL  |            |
| tr A0A146ATC2 A0A146ATC2_9BORD | . . . . . | E. GKTM | CSLCSRLRRGILY  | .RVASEL       | GATKIALGHHR  | DDILGTFF   | LNLFYNG  | GKLSKAMPKKL  |            |
| tr A0A193GK23 A0A193GK23_9BORD | . . . . . | E. GRMT | CSLCSRLRRGILY  | .RVASEL       | GATKIALGHHR  | DDILGTFF   | LNMFYNG  | GKLSKAMPKKL  |            |
| tr A0A1P8JSG9 A0A1P8JSG9_9BURK | . . . . . | E. GKTT | CGLCSRLRRGILY  | .RVASEL       | GATKIALGHHR  | DDMLQTLF   | LNMFSS   | GKLSKAMPKKL  |            |
| tr A0A1F9FMJ1 A0A1F9FMJ1_9DELT | . . . . . | E. GQAY | CFLCARLRRGILY  | .SAAERL       | CNKIALGHHR   | DDGLETL    | LNLCYAG  | LQAMPARY     |            |
| tr A0A0Q8M6U1 A0A0Q8M6U1_9GAMM | . . . . . | A. GKTM | CSLCSRLRRGALY  | .TWA AANS     | ITKIALGHHR   | DDIIATFF   | LNMFYNG  | QAQLKAMPKKL  |            |
| tr A0A2M9E118 A0A2M9E118_9GAMM | . . . . . | E. GKTM | CSLCSRLRRGALY  | .TYAAEH       | GFTKIALGHHR  | DDMVATFF   | LNMFSS   | HAKLSGMPKKL  |            |
| tr A0A2W4TF88 A0A2W4TF88_9GAMM | . . . . . | E. GKTM | CSLCSRLRRGALY  | .QWAKDH       | GFTKIALGHHR  | DDVLATFF   | MNLFSS   | HAKLATMPKKL  |            |
| tr A0A023NWG5 A0A023NWG5_9GAMM | . . . . . | E. GKTM | CSLCSRLRRGALY  | .HWA AAN      | GFTKIALGHHR  | DDIIIGTLF  | LNLFYNG  | QAQLKAMPKKL  |            |
| tr A0A0G9GZZ8 A0A0G9GZZ8_9GAMM | . . . . . | E. GKTM | CSLCSRLRRGALY  | .HWA AAN      | GVSKIALGHHR  | DDILGTFF   | LNLFYNG  | QAQLKAMPKKL  |            |
| tr A0A0U1PC50 A0A0U1PC50_9GAMM | . . . . . | A. GKTM | CSLCSRLRRGALY  | .TYAEAN       | GFTKIALGHHR  | DDIVATLF   | LNMFYNG  | HGSLKAMPKKL  |            |
| tr A0A1E4PK74 A0A1E4PK74_9GAMM | . . . . . | A. GKTM | CSLCSRLRRGALY  | .QWAAEN       | GISKIALGHHR  | DDILGTFF   | LNLFYNG  | QAQLKAMPKKL  |            |
| tr A0A1E4NQ34 A0A1E4NQ34_9GAMM | . . . . . | E. GKTL | CSLCSRLRRGALY  | .AFABER       | GFNKIALGHHR  | DDIIATFF   | LNLFHG   | GTSLKAMPKKL  |            |
| tr A0A2E2JEB1 A0A2E2JEB1_9GAMM | . . . . . | E. GKTM | CSLCSRLRRGALY  | .TFABAG       | GFTKIALGHHR  | DDIVATFF   | LNMFHG   | GRLAAMPKKL   |            |
| tr T1ATA2 T1ATA2_9ZZZZ         | . . . . . | E. GRTL | CSLCSRLRRGALY  | .QHAGAA       | GFNKIALGHHR  | DDIIATFF   | LNLFSS   | GKLSKAMPKKL  |            |
| tr A0A1V3QE62 A0A1V3QE62_9GAMM | . . . . . | A. GKTM | CSLCSRLRRGALY  | .SWA AAN      | GISKIALGHHR  | DDIIATFF   | LNMFYNG  | QAQLKAMPKKL  |            |
| tr A0A0Q9QGY0 A0A0Q9QGY0_9GAMM | . . . . . | Q. GKTM | CSLCSRLRRGALY  | .TWA AAN      | GITKIALGHHR  | DDIIATFF   | LNLFHG   | QAQLKAMPKKL  |            |
| tr A0A127FBR4 A0A127FBR4_9GAMM | . . . . . | E. GKTM | CGLCSRMRRGALY  | .RYA AEN      | GITKVALGHHR  | DDIVETLF   | LNMFSS   | GKLSKAMPKKL  |            |
| tr A0A1I4VM85 A0A1I4VM85_9GAMM | . . . . . | E. GRTL | CSLCSRLRRGALY  | .EFA ANN      | GFNRIALGHHR  | DDIVETLF   | LNLFHG   | QAQLKAMPKKL  |            |
| tr K8GM74 K8GM74_9CYAN         | . . . . . | E. GKTL | CSLCSRLRRGILY  | .QVASEE       | GATKIALGHHR  | DDIIEFTL   | LNLFHT   | GQIKAMPKKL   |            |
| tr A0A2T1CSL9 A0A2T1CSL9_9CYAN | . . . . . | A. GKTM | CGLCSRLRRGILY  | .RVAAEE       | GINKIALGHHR  | DDIIEFTL   | LNMFYNG  | GKLSKAMPKKL  |            |



tr|A0A099CZD4|A0A099CZD4\_9GAMM . . . . . E. GAT T . CGLCSRLRRGSLY . TWAAN G I T K I A L G H H G D D L V A T L F L N L F F Q A S L K S M P P K L  
tr|A0A0S8FJD6|A0A0S8FJD6\_9GAMM . . . . . E. GKT T . CGLCSRLRRGALY . TFAAEQ G F T K I A L G H H A D D I M E T L F L N L F F G K L K A M P P K L  
tr|A0A2E2VRK2|A0A2E2VRK2\_9GAMM . . . . . E. GKT T . CSLCSRLRRGTLY . SWAANN N I S K I A L G H H R D D I L E T M M L N L F F S G Q L K A M P P K L  
tr|A0A2W4RZH5|A0A2W4RZH5\_9PROT . . . . . E. GRM T . CSLCSRLRRGALY . RYAAGN G I T R I A L G H H R D D I V E T F F L N L F F G G R L K A M A P P K L  
tr|A0A1V4GN33|A0A1V4GN33\_9GAMM . . . . . E. GKT Y . CSACSRLLRRGSLY . GFAKQI G A T K V A L G H H R D D I M A T F F L N L F H G S L K A M P P K L  
tr|A0A211RJX7|A0A211RJX7\_9GAMM . . . . . E. GKT Y . CSACSRLLRRGSLY . GFAKQI G A T K V A L G H H R D D I M A T F F L N L F H G S L K A M P P K L  
tr|A0A2K0XWS5|A0A2K0XWS5\_9GAMM . . . . . E. GKT Y . CSACSRLLRRGSLY . GFAKQI G A T K V A L G H H R D D I L A T F F L N L F H G S L K A M P P K L  
tr|A0A2J9E0W4|A0A2J9E0W4\_9GAMM . . . . . E. GKT Y . CSACSRLLRRGSLY . GFAKQI G A T K I A L G H H R D D I L A T F F L N L F H G S L K A M P P K L  
tr|A0YCA3|A0YCA3\_9GAMM . . . . . E. GKT T . CGLCSRLRRGTLY . SFAETI G A T K I A L G H H R D D M V E T L F L N M F Y G S R L K S M P P K L  
tr|F3LGC1|F3LGC1\_9GAMM . . . . . E. GKT T . CGVCSRLRRGTLY . GFAEEI G A T K V A L G H H K D D I V E T L F L N M F Y G R L K A M P P K L  
tr|A0A2G6D109|A0A2G6D109\_9PROT . . . . . E. GKT M . CGLCSRLRRGTLY . SFAEEI N A N K V A L G H H K D D I V E T M F L N M F Y G S R L S G M P P K L  
tr|L2F7Z8|L2F7Z8\_9GAMM . . . . . E. GKT Y . CSACSRLLRRGSLY . GFAKQI G A T K I A L G H H R D D I M A T F F L N L F H G S L K A M P P K L  
tr|A0A1T0CIB6|A0A1T0CIB6\_9GAMM . . . . . E. GKT Y . CSACSRLLRRGSLY . GFAKQI G A T K I A L G H H R D D I L A T F F L N L F H G T L K A M P P K L  
tr|A0A1Q3YDX0|A0A1Q3YDX0\_9BURK . . . . . E. GRM T . CSLCSRLRRGILY . RVADEL G A T R I A L G H H R D D I L E T F F L N L F F G K L K A M P P K L  
tr|A0A2I2KGJ9|A0A2I2KGJ9\_9PROT . . . . . E. GKT T . CSLCSRLRRGILY . RVADEL G A T K I A L G H H R D D M L E T L F L N M F F G K L K G M P P K L  
tr|A0A059KNT0|A0A059KNT0\_9BURK . . . . . E. GKT M . CSLCSRLRRGILY . RVADEL G A N K I A L G H H R D D F L G T V F L N L F F Q G R L K G M P P K L  
tr|A0A2D9EMR9|A0A2D9EMR9\_9BURK . . . . . E. GKT M . CSLCSRLRRGILY . RVADEL G A T K I A L G H H R D D I L A T F F L N L F Y G G R M K G M P P K L  
tr|D5WYLO|D5WYLO\_THIK1 . . . . . E. GKT T . CGLCSRLRRGILY . RVADEL G A T K I A L G H H R D D I L E T F F L N L F F G G T L K G M P P K L  
tr|A0A2N4UHD8|A0A2N4UHD8\_9BURK . . . . . E. GKT M . CSLCSRLRRGILY . RVADEL G A T K I A L G H H R D D I L G T F F L N L F Y G R M K A M P P K L  
tr|A0A231HMA8|A0A231HMA8\_9BURK . . . . . E. GKT M . CSLCSRLRRGILY . RVADEL G A T K I A L G H H R D D I L A T F F L N L F Y G G R M K G M P P K L  
tr|A0A127PZQ3|A0A127PZQ3\_9BURK . . . . . E. GKT T . CSLCSRLRRGILY . RVADEL G A T K V A L G H H R D D I M E T F F L N M F F G K L K S M P P K L  
tr|A0A1L5XXU0|A0A1L5XXU0\_9XANT . . . . . A. GKT M . CSLCSRLRRGALY . AYAAH G V T K I A L G H H R D D I V A T F F M N L F H H A R L A A M A P P K L  
tr|E6PW05|E6PW05\_9ZZZZ . . . . . E. GKT L . CSLCSRLRRGILY . RVADEL G A T R I A L G H H R D D I L Q T F F L N L F H G Q L K A M P P K L  
tr|A0A259PCA8|A0A259PCA8\_9BURK . . . . . E. GKT M . CSLCSRLRRGILY . RLAGE L G A T K I A L G H H R D D I L Q T F F L N M F F G Q L K G M P P K L  
tr|J3D2W3|J3D2W3\_9BURK . . . . . E. GKT T . CALCSRLRRGILY . RVADEL G A T K I A L G H H R D D I L E T F F L N M F F G K L K G M P P K L  
tr|A0A1C3H6K4|A0A1C3H6K4\_9GAMM . . . . . E. GKT M . CSLCSRLRRGILY . TYAKQF G M T K I A L G H H K F D I M E T F F L N L F H G Q L K A M P P K L  
tr|A0A1Q3XG69|A0A1Q3XG69\_9BURK . . . . . E. GKT M . CSLCSRLRRGILY . RVADEL G A T K I A L G H H R D D I L A T F F M N M F Y G Q L K S M P P K L  
tr|A0A2V1K2N5|A0A2V1K2N5\_9BORD . . . . . E. GKT M . CSLCSRLRRGILY . RVADEL G A T K I A L G H H R D D I L G T F F L N L F Y G K M K A M P P K L  
tr|A0A0G3BIT1|A0A0G3BIT1\_9BURK . . . . . E. GKT M . CSLCSRLRRGVLY . RVADEL G A T K I A L G H H R D D M L Q T F F L N M F F G K L K G M P P K L  
tr|A0A2U2N809|A0A2U2N809\_9GAMM . . . . . E. GQTA . CSLCSRLRRGILY . GTARE L G A T R I A L G H H R D D I L E T F F L N L F Y G R L A A M P P K L  
tr|A0A1U9K1B5|A0A1U9K1B5\_9BURK . . . . . E. GKT Y . CSLCSRLRRGILY . RVADEL G A T K I A L G H H R D D I L A T F F L N L F Y G R L K A M P P K L  
tr|A0A272ZE66|A0A272ZE66\_9RHOO . . . . . E. GKT T . CSLCSRLRRGILY . RTASE L G A T K I A L G H H R D D I L E T F F L N M F F G K L K A M P P K L  
tr|C3X5M8|C3X5M8\_OXAFO . . . . . E. NKPV . CSLCSRLRRGILY . RVADEL G A T K I A L G H H R D D M V L E T F F L N L F Y G S K I K S M P P K L  
tr|A0A2W4M0X6|A0A2W4M0X6\_9PROT . . . . . E. GRM T . CGLCSRLRRGALY . RFAAEH G M T K I A L G H H R D D I V E T L F L N M F F G K L K A M P P K L  
tr|A0A2G4J906|A0A2G4J906\_9BURK . . . . . E. GKT T . CSLCSRLRRGILY . RVADEL G A T K I A L G H H R D D I L G T F F L N L F Y G K L K A M P P K L  
tr|A0A1J4S131|A0A1J4S131\_9BURK . . . . . A. GKT M . CSLCSRLRRGILY . GVADR L K I T K I A L G H H R D D M L Q T F F L N L F F A G K L K G M P P K L  
sp|A1WHW6|TTCA\_VERTI . . . . . E. GKT T . CSLCSRLRRGILY . RVADEL G C T K I A L G H H R D D I L Q T L L N M F F G K M K S M P P K L  
tr|E6UVL9|E6UVL9\_VARPE . . . . . E. GKT T . CGLCSRLRRGILY . RVADEL G A T K V A L G H H R D D M L Q T F F L N M F F A G K L K S M P P K L  
tr|A0A2X1UQ14|A0A2X1UQ14\_9BURK . . . . . E. GKT T . CSLCSRLRRGILY . RVAEEF G C N K I A L G H H R D D I L A T F F L N L F Y A A K L K S M P P K L  
tr|A0A1J1E0T5|A0A1J1E0T5\_LYSEN . . . . . E. GKT M . CSLCSRLRRGALY . TYAEQ G F T K I A L G H H R D D I V A T F F L N L F F H A K L S G M P P K L  
tr|A0A0S4P2H4|A0A0S4P2H4\_9BURK . . . . . E. GKT T . CSLCSRLRRGILY . RVADEL G C N K I A L G H H R D D I L E T F F L N M F F G K L K A M P P K L  
tr|R7I1J5|R7I1J5\_9BURK . . . . . S. GQHI . CSLCSRLRRGILY . TTADKL G L T K I A L G H Q M D D I V S T L M L N M F F G Q M K G M P P V L  
tr|F1VXA8|F1VXA8\_9BURK . . . . . E. GKT T . CSLCSRLRRGILY . RVADEL G A T K I A L G H H R D D I L E T F F L N M F F G K L K S M P P K L  
tr|A0A1H9Z341|A0A1H9Z341\_NITER . . . . . E. GKT T . CSLCSRLRRGVLY . RVADEL G A T K I A L G H H R D D I L E T F F L N M F F G K L K A M P P K L  
tr|V4XY05|V4XY05\_9PROT . . . . . A. GKT M . CSLCSRLRRGILY . RVADEL G A C N K I A L G H H R D D I L Q T L L N M F F G A C L K A M P A P K L  
tr|A0A1F2T4S5|A0A1F2T4S5\_9BACT . . . . . D. GATP . CSLCARLRRGVLY . RISEKV G A N K I A L G H H A D D I E T L L L N L F F A G L K A M P A P K L  
sp|Q0AA41|TTCA\_ALKEH . . . . . E. GKT K . CSLCSRLRRGILY . GAAEEM G C S K I A L G H H R D D I L E T F F L N L F Y G R L A A M P P K L  
tr|A0A147GW72|A0A147GW72\_9BURK . . . . . E. GKT T . CGLCSRLRRGILY . RVADEL G A T K V A L G H H R D D I L A T F F L N M F F A A K L K A M P P K L  
tr|A0A1F4HB56|A0A1F4HB56\_9BURK . . . . . E. GKT L . CSLCSRLRRGILY . RVADEL G A T K I A L G H H R D D M L Q T F F L N M F F A A K L K A M P P K L  
tr|A0A2R4XML8|A0A2R4XML8\_9BORD . . . . . E. GKT T . CSLCSRLRRGVLY . RVADEL G A T K I A L G H H R D D I L G T F F L N L F F A A R L K A M P P K L  
tr|A0A0Q7D0U2|A0A0Q7D0U2\_9BURK . . . . . E. GKT M . CSLCSRLRRGILY . RVADEL G A T K I A L G H H R D D M L Q T F F L N M F F G A K L K G M P P K L  
tr|H5WKR2|H5WKR2\_9BURK . . . . . E. GKT L . CSLCSRLRRGILY . RVADEL G A T K I A L G H H R D D M V V T L L N M F F G S R L K S M P P K L  
tr|A0A1G4AY92|A0A1G4AY92\_9GAMM . . . . . E. GKT M . CSLCSRLRRGALY . THAAEH G F T K I A L G H H R D D L V A T F F L N L F F H A K L S G M P P K L  
tr|A0A0N1AQX3|A0A0N1AQX3\_9PROT . . . . . E. GQTM . CSLCSRLRRGILY . RVADEL G A T K I A L G H H R D D M V V T M L N M F F G H R L K G M P A P K L  
tr|A0A2M8VQK0|A0A2M8VQK0\_9BURK . . . . . E. GKT T . CGLCSRLRRGILY . RVADEL G A T K I A L G H H R D D I L E T L M L N M F F A G K L K G M P P K L  
sp|B1XSG8|TTCA\_POLNS . . . . . D. GKT T . CGLCSRLRRGILY . RVADEL G A T K I A L G H H R D D I L E T L M L N M F Y A G K L K G M P P K L  
tr|A0A0Q4Y4D9|A0A0Q4Y4D9\_9BURK . . . . . E. GKT T . CGLCSRLRRGILY . RVADEL G A T K I A L G H H R D D I L Q T L L N M F F A A K L K S M P P K L  
tr|D8PAI7|D8PAI7\_9BACT . . . . . E. GQTT . CSLCSRLRRGILY . RLATE L G A T K I A L G H H R D D I L E T L L L N L F T G K M A M P P K L  
tr|A0A2W4TTJ2|A0A2W4TTJ2\_9BURK . . . . . E. GKT M . CSLCSRLRRGILY . RVADEL G A T K I A L G H H R D D I L Q T L L N M F F G A R L K G M P P K L  
tr|F5XXJ8|F5XXJ8\_RAMTT . . . . . E. GKT M . CSLCSRLRRGILY . RVADEL G A T K I A L G H H R D D I L Q T F F L N M F F G K L K A M P P K L  
tr|A0A1J5S2E4|A0A1J5S2E4\_9ZZZZ . . . . . P. GKT T . CSLCSRLRRGVLY . RVADEL G A T K I A L G H H R D D I L E T F F L N M F F G K L K A M P P K L  
tr|A0A149VSF2|A0A149VSF2\_9PROT . . . . . A. GKT T . CSLCSRLRRGILY . RSAEL K A T K I V L G H H Q D D I L Q T F F L N L F Y G R L K G M P A P K L  
tr|A0A1T5KK47|A0A1T5KK47\_9GAMM . . . . . E. GKT M . CSLCSRLRRGALY . AHAQEA G F T K I A L G H H R D D L V N T F F L N L F H H A K I A G M P P K L  
tr|A0A1J5QH13|A0A1J5QH13\_9ZZZZ . . . . . E. GSTM . CSLCSRLRRGILY . RVADEL G A T K I A L G H H R D D I L Q T F F L N L F H G K L K G M P P K L  
tr|A0A239BRC0|A0A239BRC0\_9BURK . . . . . E. GKT T . CALCSRLRRGILY . RVADEL G A T K I A L G H H R D D I L E T F F L N M F F G A K L K G M P P K L  
tr|A0A2N2UY70|A0A2N2UY70\_9PROT . . . . . E. GKT T . CSLCSRLRRGVLY . RVADEL G A T R I A L G H H R D D I L Q T F F L N M F F A G K L K A M P P K L  
tr|A0A1D2TFZ7|A0A1D2TFZ7\_9BURK . . . . . E. GRM T . CSLCSRLRRGILY . RVADEL G A T K I A L G H H R D D I L E T F F L N M F F G K L K G M P P K L  
tr|A0A0E3UN32|A0A0E3UN32\_9GAMM . . . . . E. GKT M . CSLCSRLRRGALY . SYAAAH G F T K I A L G H H R D D I V A T F F L N L F H H A K L S G M P P K L  
tr|A0A1G3HJ33|A0A1G3HJ33\_9RHOO . . . . . E. GKT T . CSLCSRLRRGVLY . RVADEL G A T K I A L G H H R D D I L Q T F F L N M F F G K L K S M P P K L  
tr|A0A1D2SHY1|A0A1D2SHY1\_9BURK . . . . . E. GRM T . CSLCSRLRRGILY . RVADEL G A T K I A L G H H R D D I L E T F F L N M F F G K L K A M P P K L  
tr|A0A0S8AXD2|A0A0S8AXD2\_9PROT . . . . . E. GKT T . CSLCSRLRRGILY . RVADEL G A T R I A L G H H R D D I V A T F F L N L F H G K L K G M P P K L  
tr|A0A2S9H4F0|A0A2S9H4F0\_9BURK . . . . . E. GKT T . CSLCSRLRRGILY . RVADEL G A N K I A L G H H R D D I L E T F F L N M F F G A K I K G M P A P K L  
tr|A0A0Q5YU64|A0A0Q5YU64\_9BURK . . . . . E. GKT M . CSLCSRLRRGILY . RVADEL G A T K I A L G H H R D D I L Q T F F L N M F F G K L K G M P P K L  
tr|A0A127JUC5|A0A127JUC5\_9BURK . . . . . E. GKT M . CSLCSRLRRGILY . RVADEL G A T R I A L G H H R D D I L Q T F F L N M F F G K L K G M P P K L  
tr|A0A0Q5ISN8|A0A0Q5ISN8\_9DEIO . . . . . V. GKT T . CALCSRLRRGALY . AHARR L G A T K I A L G H H R D D I L E T F F M N L F F G A R L K A M P P K L  
tr|A0A149W1G2|A0A149W1G2\_9PROT . . . . . A. GKT T . CSLCSRLRRGVLY . RTAKVL G A N K I A L G H H R D D M V E T F F L N L F H G R L K G M P P K L  
tr|A0A1Y2R1U1|A0A1Y2R1U1\_9BURK . . . . . E. GKT M . CSLCSRLRRGILY . RVADEL G A T R I A L G H H R D D I L Q T L L N M F F G A K L K G M P P K L  
tr|A0A0S4LKC6|A0A0S4LKC6\_9BACT . . . . . E. GQTT . CSLCSRLRRGILY . RIAGE L G A T K I A L G H H R D D I V E T L F L N L F Y T G K L K A M P P K L  
tr|A0A2N2TX36|A0A2N2TX36\_9PROT . . . . . E. GKT T . CSLCSRLRRGVLY . RVADEL G A T K I A L G H H R D D I L E T F F L N L F Y G K L K A M P P K L  
tr|A0A023Y8A4|A0A023Y8A4\_9GAMM . . . . . E. GRM T . CSLCSRLRRGALY . RHAEN G F S K I A L G H H R D D S V A T F F L N L F H H A K L S A M P P K L  
tr|A0A1E4IL97|A0A1E4IL97\_9BURK . . . . . E. GKT M . CSLCSRLRRGILY . RVADEL G A T K I A L G H H R D D M V V T L L N M F F G S R L K S M P P K L  
tr|A0A1C9V9X4|A0A1C9V9X4\_9BURK . . . . . E. GKT L . CSLCSRLRRGILY . RVADEL G A T K I A L G H H R D D M L Q T L L N M F F G A K L K G M P A P K L  
tr|A0A2U1RUV0|A0A2U1RUV0\_9PROT . . . . . E. GKT M . CSLCSRLRRGVLY . RVADEL G A T K I A L G H H R D D I L E T F F L N L F H N G K L K A M S P P K L  
sp|A7H8W2|TTCA\_ANADF . . . . . E. GKT T . CPVCSRLRRGVLY . NAAAE M G C T K I A L G H H R D D L V E T F F L S A L Y S G A L K S M P P K L  
tr|A0A2S7DIN9|A0A2S7DIN9\_9XANT . . . . . A. GKT L . CSLCSRLRRGALY . AYAAH G V T K I A L G H H R D D I V A T F F M N L F H H A R L A A M A P P K L  
tr|A0A0Q6WLA5|A0A0Q6WLA5\_9BURK . . . . . E. GKT T . CGLCSRLRRGILY . RVADEL G C T K I A L G H H R D D I L Q T F F M N M F F G S K L K G M P A P K L  
tr|A0A240DXW0|A0A240DXW0\_9BURK . . . . . E. GKT T . CGLCSRLRRGILY . RVADEL G A T K I A L G H H R D D I L E T L L N M F F A G K L K G M P P K L  
tr|A0A0C3RNN2|A0A0C3RNN2\_9PROT . . . . . E. GKT T . CSLCSRLRRGVLY . RVADEL G A T K I A L G H H R D D I L E T F F L N L F Y G K L K T M P P K L  
tr|A0A2W4K1C2|A0A2W4K1C2\_9PROT . . . . . E. GKT M . CSLCSRLRRGVLY . RVADEL G A T K I A L G H H R D D I L E T F F L N L F F G K L K A M P P K L  
tr|A0A2E6VR38|A0A2E6VR38\_9DELT . . . . . A. GKT Y . CSLCSRLRRGILY . STARL N C N K I A L G H H L D D S L E T L M L N L F F G G K L Q A M P A P K L  
tr|A0A2V8BCR6|A0A2V8BCR6\_9BACT . . . . . D. GATP . CSLCARLRRGVLY . RVAKE T G A T K I A L G H H A D D I E T L L L N L F F A G S L K A M P P K L  
sp|B0RYX8|TTCA\_XANCB . . . . . Q. GKT M . CSLCSRLRRGALY . AYAAH G V T K I A L G H H R D D I V A T F F M N L F H H A R L A A M A P P K L  
tr|A0A0A1H5Z5|A0A0A1H5Z5\_9BURK . . . . . E. GKT M . CSLCSRLRRGVLY . RVADEL G A T K I A L G H H R D D I L G T F F L N L F Y G G R I K A M P P K L  
tr|A0A1F4B9Q3|A0A1F4B9Q3\_9PROT . . . . . E. GKT M . CSLCSRLRRGVLY . RLAGE L G A T R I A L G H H R D D I L E T F F L N L F F G K L K A M P P K L  
tr|A0A0Q7AH75|A0A0Q7AH75\_9BURK . . . . . E. GKT M . CSLCSRLRRGILY . RVADEL G A T K I A L G H H R D D M L Q T F F L N M F F G A K L K G M P A P K L  
tr|C3XBV2|C3XBV2\_OXAFO . . . . . E. GKA V . CSLCSRLRRGILY . KVAEL G V T K I A L G H H R D D V L E T F F L N L F F G S R L K S M P P K L  
tr|R7KKV3|R7KKV3\_9BURK . . . . . E. GRNV . CSVCSRLRRGILY . RVADEL G I T K I A L G H H M D D I V S T L L N M F Y G K L K G M P P I L  
tr|A0A2N6HLY9|A0A2N6HLY9\_9BACT . . . . . E. GQTT . CSLCSRLRRGILY . RVADEL G A T K I A L G H H R D D I I E T F F L N L F Y T G K L K T M P P K L  
tr|A0A2A3VI31|A0A2A3VI31\_9GAMM . . . . . E. GKT M . CSLCSRLRRGALY . TYAEAN G F T K I A L G H H R D D L V A T F F L N L F F H A K L S G M P P K L  
tr|A0A2V8SAY2|A0A2V8SAY2\_9BACT . . . . . L. GDTH . CSMCARLRRGVLY . RLAPRL G C N K I A L G H H A D D I L E T L L M S Q F F N G I C S M P P I L  
tr|I4W9P8|I4W9P8\_9GAMM . . . . . Q. GRM T . CSLCSRLRRGALY . QWAADN G V T K I A L G H H R D D I L A T F F L N L F H Q A N L K A M P P K L  
tr|A0A1Q7HR32|A0A1Q7HR32\_9BACT . . . . . L. GDTH . CSMCARLRRGVLY . RIAPEL G C N K I A L G H H A D D I L E T L L M S Q F F N G I C S M P P I L  
tr|A0A1I1X1F5|A0A1I1X1F5\_9DELT . . . . . A. GKAY . CSMCSRLRRGILY . TAAER L G C N K I A L G H H R D D S L E T L L L N L F Y A G R L Q A M P A G Y

tr|A0A2T0XCQ9|A0A2T0XCQ9\_9PROT . . . . . E. GKTT. CSLCSRLRRGILY. RVAAELGATKIALGHHRDDIATFFLNLFYGAKLKAMPKKL  
tr|A0A1H1GE24|A0A1H1GE24\_9GAMM . . . . . E. GRTM. CSLCSRLRRGILY. AHADAHFATKIALGHHRDDMVAFFLNLFYHAKLSAMPKKL  
tr|A0A2K3V265|A0A2K3V265\_9DETO . . . . . P. GQTT. CTLCSRLRRGILY. AQATRLGATRIALGHHREDIILQTLFFLNLFYGARLKAMPKKL  
tr|A0A077DFR5|A0A077DFR5\_9BURK . . . . . E. GKTT. CSLCSRLRRGILY. RVAAELGATKIALGHHRDDIATFFLNLFYAAKLSMPKKL  
tr|A0A0R0D1A2|A0A0R0D1A2\_9GAMM . . . . . E. GRTO. CSLCSRLRRGILY. QHAATHGFTRIALGHHDDMAATFLMNLFFHHAHLSGMPKKL  
tr|A0A1H6SN85|A0A1H6SN85\_9GAMM . . . . . A. GKTM. CSLCSRLRRGILY. RWAENGITRIALGHHRDDIATFFLNLFYHAKLSAMPKKL  
tr|A0A0S8B9F1|A0A0S8B9F1\_9PROT . . . . . E. GKTL. CGLCSRLRRGVLY. RVAGELGATKIALGHHRDDIATFFLNLFYGGKLSAMPKKL  
tr|A0A1W2AVA5|A0A1W2AVA5\_9BURK . . . . . E. GKTT. CGLCSRLRRGILY. RVADELGATKIALGHHREDIETLLNLMFYGGKLSAMPKKL  
tr|A0A1F4C0R4|A0A1F4C0R4\_9PROT . . . . . E. GATM. CGLCSRLRRGVLY. RLATELKA TKIALGHHRDDILETFFLNLFYGGKLMGMSPKL  
tr|A0A0G9I466|A0A0G9I466\_9XANT . . . . . E. GKTM. CSLCARLRRGILY. RYAAENGINKIALGHHRDDIVATFFMNLFFHAKLAAMPKKL  
tr|A0A142LLS3|A0A142LLS3\_9PROT . . . . . E. GKTM. CSLCSRLRRGVLY. RVAAELGANKIALGHHRDDNVQTFFLNLFYGSRLKAMPKKL  
tr|A0A0S4KPD2|A0A0S4KPD2\_9BACT . . . . . E. GETT. CSLCSRLRRGHLY. RIATELGATKIALGHHRDDIETLFFLNLFYGGKLSAMPKKL  
tr|A0A1F3ZUE5|A0A1F3ZUE5\_9PROT . . . . . E. GKTM. CSLCSRLRRGVLY. RVAGELGATKIALGHHRDDIETLFFLNLFYGGTLLKAMPKKL  
tr|A0A1F4DZ03|A0A1F4DZ03\_9PROT . . . . . E. GKTM. CSLCSRLRRGVLY. RVAGELGATRIALGHHRDDIETFFLNLMFYGGTLLKAMPKKL  
tr|I7JPW7|I7JPW7\_9BURK . . . . . E. GKTT. CSLCSRLRRGILY. RVSDDELGCTKIALGHHRDDIATFFLNLFYAAKLLKAMPKKL  
tr|A0A1W9I1Z2|A0A1W9I1Z2\_9BACT . . . . . E. GQTT. CSLCSRLRRGHLY. RIASELGATKIALGHHRDDIAETLFFLNLFYGGKLSAMPKKL  
tr|A0A0K6INV6|A0A0K6INV6\_9PROT . . . . . E. GKTT. CSLCSRLRRGILY. RTARELGANKVALGHHRDDIETLFFLNLFYGGKLSAMPKKL  
tr|A0A1Q7K1L6|A0A1Q7K1L6\_9BACT . . . . . E. GATP. CSLCARLRRGVLY. RIAKETGATKIALGHHDDFIETLLNLFYAGSLKAMPKKL  
tr|A0A1F4A4W7|A0A1F4A4W7\_9PROT . . . . . E. GKTM. CSLCSRLRRGVLY. RVASEIGATKIALGHHRDDIETLFFLNLFYGGKLSAMPKKL  
tr|A0A1W1I491|A0A1W1I491\_9BACT . . . . . E. GQTT. CSLCSRLRRGHLY. RIASELGATKIALGHHRDDIVETLLNLFYGGKLSAMPKKL  
tr|A0A0A0EQJ7|A0A0A0EQJ7\_9GAMM . . . . . E. GKTM. CSLCSRLRRGILY. TWAENGVTKIALGHHRDDIVATFFLNLFYHAKLSAMPKKL  
tr|A0A227KHY1|A0A227KHY1\_9BURK . . . . . D. PRNF. CSLCSRLRRGIVY. RIAKEQKVTKIALGHHMDDVVSLLNMYYGGKLSAMPKKL  
tr|G7UTP0|G7UTP0\_PSEUP . . . . . Q. GKAL. CSLCSRLRRGILY. AHAAHRHFTKIALGHHRDDIVATFFMNLFFHAKLSAMPKKL  
tr|A0A2E9QVJ1|A0A2E9QVJ1\_9DELT . . . . . P. GQVR. CSLCSRLRRGILY. NIAETFGCTKIALGHHRDDIETLFFLNLFYGGKLSAMPKKL  
tr|A0A2D4T7S2|A0A2D4T7S2\_9GAMM . . . . . E. GKTT. CGLCSRLRRGILY. GFAEQIGASKIALGHHRDDIVETLLNLFYGGKLSAMPKKL  
tr|D0LKN0|D0LKN0\_HALO1 . . . . . P. GATP. CSLCSRLRRGVLY. NLAGEFAC TKIALGHHDDIETLFFLNLMYSGKLSAMPKKL  
tr|A0A1E4K8H8|A0A1E4K8H8\_9GAMM . . . . . E. GRTM. CSLCSRLRRGILY. DHAAAEFCTKIALGHHRDDIVETLFFLNLFYHAKLSAMPKKL  
tr|A0A1F4APU1|A0A1F4APU1\_9PROT . . . . . E. GRTM. CSLCSRLRRGVLY. RVAGEIGATRIALGHHRDDIETLFFLNLFYGGKLSAMPKKL  
tr|A0A2N6GWA5|A0A2N6GWA5\_9BACT . . . . . E. GQTT. CSLCSRLRRGILY. RVATELGATKIALGHHRDDIETLFFLNLFYGGKLSAMPKKL  
tr|A0A2N6CXG2|A0A2N6CXG2\_9GAMM . . . . . V. GKTT. CSLCSRLRRGILY. RYAAENGISKIALGHHRDDIVETLFFLNLFYGGKLSAMPKKL  
tr|A0A0H1AUB9|A0A0H1AUB9\_9GAMM . . . . . E. GKTM. CSLCSRLRRGILY. TYAENGCTKIALGHHRDDIVATFFLNLFYHAKLSAMPKKL  
tr|A0A136JY00|A0A136JY00\_9BACT . . . . . E. GQTT. CSLCSRLRRGHLY. RLAAELGATKIALGHHRDDIETLFFLNLFYGGKLSAMPKKL  
tr|A0A2P56X0|A0A2P56X0\_9XANT . . . . . E. GKTL. CSLCSRLRRGILY. RYAAENGCTKIALGHHRDDIVATFFMNLFFHAKLSAMPKKL  
tr|A0A2N6HCJ3|A0A2N6HCJ3\_9BACT . . . . . E. GQTT. CSLCSRLRRGHLY. RIASELGATKIALGHHRDDINETLFFLNLFYGGKLSAMPKKL  
tr|A0A1B3W763|A0A1B3W763\_9GAMM . . . . . E. GKTM. CSLCSRLRRGILY. TYAAEHGFCTKIALGHHREDMVATFFLNLFYHAKLSAMPKKL  
tr|A0A1Q3HX84|A0A1Q3HX84\_9DELT . . . . . P. GKTO. CAVCSRLRRGILY. TAAVELGCTKIALGHHRDDIETLFFLNLFYAGSLKAMPKKL  
tr|A0A0S8DJ34|A0A0S8DJ34\_9PROT . . . . . E. GKTM. CGLCSRLRRGVLY. RVASELGATRIALGHHRDDIETLFFLNLFYHAKLSAMPKKL  
tr|A0A1H9F4W7|A0A1H9F4W7\_9GAMM . . . . . E. GKTM. CSLCSRLRRGILY. SYAAEHGYNKIALGHHKDDIVATFFLNLFYHAKLSAMPKKL  
tr|A0A1Q7RN46|A0A1Q7RN46\_9BACT . . . . . L. GDTH. CSMCARLRRGVLY. RIAPELRCNKIALGHHDDIETLFFMSQFFNGEICSMPIIL  
tr|A0A2W4SMK5|A0A2W4SMK5\_9PROT . . . . . E. GRTM. CGLCSRLRRGILY. RFAAENGITKIALGHHRDDIVETLFFNMFFGGKLSAMPKKL  
tr|A0A1W9GP08|A0A1W9GP08\_9BACT . . . . . E. GQTT. CALCSRLRRGHLY. RIAATELGATKIALGHHRDDIETLFFLNLFYGGKLSAMPKKL  
tr|A0A2V8L7U0|A0A2V8L7U0\_9BACT . . . . . E. GKTS. CAVCSRLRRGILY. NIAVEEGCTKIALGHHDDIETLFFLNLFYIGRLKAMPKKL  
tr|A0A2N6HCC5|A0A2N6HCC5\_9BACT . . . . . E. GQTT. CSLCSRLRRGILY. RVATELGATKIALGHHRDDIETLFFLNLFYGGKLSAMPKKL  
tr|A0A2P6UWD7|A0A2P6UWD7\_9BURK . . . . . E. GKTT. CSLCSRLRRGILY. RIAELGATKIALGHHRDDIVETLFFLNLFYGGKLSAMPKKL  
tr|A0A1W9Q7F1|A0A1W9Q7F1\_9DELT . . . . . E. GQTY. CSLCSRLRRGVLY. RAAELGCTKIALGHHRDDIETLFFMNLFYGGKLSAMPKKL  
tr|D2U914|D2U914\_XANAP . . . . . E. GKTL. CSLCSRLRRGILY. RYAAEHGISKIALGHHDDMVATFFMNLFFHAKLSAMPKKL  
tr|A0A2V8QZ45|A0A2V8QZ45\_9BACT . . . . . E. GKTY. CSLCSRLRRGILY. RVATEEGCTKIALGHHDDIETLFFLNLFYGGKLSAMPKKL  
tr|A0A0C1ZJ02|A0A0C1ZJ02\_9DELT . . . . . A. GKAF. CSLCSRLRRGILY. DVAVELGATKIALGHHRDDIVETLFFLNLFYAGSLKAMPKKL  
tr|A0A2G4JKQ0|A0A2G4JKQ0\_9BACT . . . . . S. DDT. CSLCARLRRGVLY. RMAKETGATKIALGHHRDDIETLFFLNLFYAGSLKAMPKKL  
tr|A0A1P8FIE4|A0A1P8FIE4\_9PROT . . . . . E. GKTM. CSLCSRLRRGILY. RVAGELGATKIALGHHRDDIVETLFFLNLFYGGKLSAMPKKL  
tr|A0A2N6C1I7|A0A2N6C1I7\_9GAMM . . . . . E. GKTM. CSLCSRLRRGILY. TFAAEHGFTRIALGHHRDDIETLFFLNLFYHAKLSAMPKKL  
tr|A0A2E6NRV0|A0A2E6NRV0\_9BACT . . . . . K. DNST. CGPCLSRRLRGILY. TTAERLGNKIALGHHRDDIETLFFLNLFYAGSLKAMPKKL  
tr|A0A0S4M5G9|A0A0S4M5G9\_9BACT . . . . . P. QDTK. CSLCSRLRRGILY. RLAAELGVNKIALGHHRDDIETLFFLNLFYHAKLSAMPKKL  
tr|A0A2V8RRY8|A0A2V8RRY8\_9BACT . . . . . E. GKTY. CSVCARLRRGILY. NIAAEAGCTKIALGHHDDIETLFFLNLFYIGRLKAMPKKL  
tr|A0A2V8NMT6|A0A2V8NMT6\_9BACT . . . . . E. GKTY. CSVCARLRRGILY. NLAAVEGCTKIALGHHDDIETLFFLNLFYIGRLKAMPKKL  
tr|A0A1Z3HKZ4|A0A1Z3HKZ4\_9CYAN . . . . . D. GKTM. CGLCSRLRRGILY. RVAAEAGATKIALGHHRDDIVETLFFLNLFYHAKLSAMPKKL  
tr|A0A1E3YP57|A0A1E3YP57\_9BACT . . . . . D. DTP. CSLCARLRRGVLY. RLASQHGATKIALGHHRDDIVETLFFLNLFYHAKLSAMPKKL  
tr|A0A1F2VT74|A0A1F2VT74\_9BACT . . . . . S. DDT. CSLCARLRRGVLY. RLATQTGATKIALGHHRDDIVETLFFLNLFYHAKLSAMPKKL  
tr|A0A229FVN0|A0A229FVN0\_9BURK . . . . . E. GKTT. CSLCSRLRRGILY. RVAGELGATKIALGHHRDDIETLFFLNLFYHAKLSAMPKKL  
tr|A0A1Q7NMH3|A0A1Q7NMH3\_9BACT . . . . . E. GKTF. CAVCSRLRRGILY. NIAVEERGCTKIALGHHDDIETLFFLNLFYHAKLSAMPKKL  
tr|A0A1F2UEC9|A0A1F2UEC9\_9BACT . . . . . A. DQTP. CSLCARFRRGVLY. RIAATELGATKIALGHHRDDIETLFFLNLFYHAKLSAMPKKL  
tr|A0A2W4IY52|A0A2W4IY52\_9PROT . . . . . P. GKTT. CSLCSRLRRGILY. DVAVELGATKIALGHHRDDIETLFFLNLFYHAKLSAMPKKL  
tr|A0A1Q4F9M9|A0A1Q4F9M9\_9GAMM . . . . . A. GRTM. CSLCSRLRRGILY. DFAAKNGYNRIALGHHRDDIVETLFFLNLFYHAKLSAMPKKL  
tr|A0A177QU13|A0A177QU13\_9PROT . . . . . E. GQTM. CSLCSRLRRGVLY. RVAGELGATKIALGHHRDDIATFFLNLFYHAKLSAMPKKL  
tr|A0A2E6DH17|A0A2E6DH17\_9DELT . . . . . E. GKIF. CSLCSRLRRGILY. KAALRHGCTKIALGHHRDDIETLFFLNLFYHAKLSAMPKKL  
tr|A0A1F4AZ02|A0A1F4AZ02\_9PROT . . . . . E. GKTY. CSLCSRLRRGILY. RVAGELGATKIALGHHRDDIATFFLNLFYHAKLSAMPKKL  
tr|A0A1G0K8S4|A0A1G0K8S4\_9GAMM . . . . . E. GDMT. CGLCSRLRRGILY. SFARAEVGYNKIALGHHRDDIETLFFLNLFYHAKLSAMPKKL  
tr|A0A1F2S0S1|A0A1F2S0S1\_9BACT . . . . . A. SATP. CSLCARLRRGVLY. RIAAEVAGSKIALGHHRDDIETLFFLNLFYHAKLSAMPKKL  
tr|A0A1F4F7H5|A0A1F4F7H5\_9PROT . . . . . E. GKTM. CSLCSRLRRGVLY. RVAGELGATRIALGHHRDDIATFFLNLFYHAKLSAMPKKL  
tr|A0A1F4EY53|A0A1F4EY53\_9PROT . . . . . E. GKTY. CSLCSRLRRGILY. RVAGELGATRIALGHHRDDIVATFFLNLFYHAKLSAMPKKL  
tr|A0A2V9MNZ3|A0A2V9MNZ3\_9BACT . . . . . E. GETT. CALCSRLRRGILY. NAAVELRCNKIALGHHRDDIETLFFLNLFYGGTLLKAMPKKL  
tr|A0A1F2T0Z1|A0A1F2T0Z1\_9BACT . . . . . S. NATP. CSLCARLRRGVLY. RIASETGATKIALGHHRDDIETLFFLNLFYHAKLSAMPKKL  
tr|A0A2E1W0Q9|A0A2E1W0Q9\_9BACT . . . . . E. RSTP. CSLCARLRRGVLY. RIAAGEVATKIALGHHRDDIETLFFLNLFYHAKLSAMPKKL  
tr|A0A2E8PU16|A0A2E8PU16\_9SPIO . . . . . E. GKTY. CAVCSRLRRGILY. RLAAELGCTKIALGHHRDDIETLFFLNLFYHAKLSAMPKKL  
tr|A0A2E3YPS5|A0A2E3YPS5\_9GAMM . . . . . K. GKTM. CGLCSRLRRGVLY. RAADELGVTKIALGHHQDDMVEITLFFLNLFYHAKLSAMPKKL  
tr|A0A2V9IN59|A0A2V9IN59\_9BACT . . . . . E. GKTT. CSLCSRLRRGILY. KTAIEEGCTKIALGHHRDDIETLFFLNLFYHAKLSAMPKKL  
tr|A0A2N6EE65|A0A2N6EE65\_9DELT . . . . . P. GSYS. CSFCLSRRLRGILY. SVADKLGNKIALGHHRDDIETLFFLNLFYHAKLSAMPKKL  
tr|A0A2S9YG53|A0A2S9YG53\_9DELT . . . . . P. GKAY. CAACSRLRRGVLY. TNAARLGNKIALGHHRDDIETLFFLNLFYHAKLSAMPKKL  
tr|A0A1V5WZE2|A0A1V5WZE2\_9DELT . . . . . E. GKSF. CSLCSRLRRGILY. RLSDDELGNKIALGHHRDDIETLFFLNLFYHAKLSAMPKKL  
tr|A0A2W4LZQ0|A0A2W4LZQ0\_9PROT . . . . . E. NKTY. CSLCSRLRRGILY. TVAVELGATKIALGHHRDDIETLFFLNLFYHAKLSAMPKKL  
tr|A0A2V8HI30|A0A2V8HI30\_9BACT . . . . . D. GATP. CSLCARLRRGILY. RLADTVGATKIALGHHRDDIETLFFLNLFYHAKLSAMPKKL  
tr|A0A1Z9BBR1|A0A1Z9BBR1\_9PROT . . . . . R. EKIT. CSFCLSRRLRGILY. CIAKVLDTKIALGHHRDDIETLFFLNLFYHAKLSAMPKKL  
tr|A0A2V8BI128|A0A2V8BI128\_9BACT . . . . . D. GATP. CSLCARLRRGVLY. RIAKEIGATKIALGHHRDDIETLFFLNLFYHAKLSAMPKKL  
tr|A0A2V8FAJ3|A0A2V8FAJ3\_9BACT . . . . . A. DETP. CSLCARLRRGVLY. RLAADELGATKIALGHHRDDIVETLFFLNLFYHAKLSAMPKKL  
tr|A0A1F9LA55|A0A1F9LA55\_9DELT . . . . . P. GKVY. CSLCSRLRRGILY. KAATRHGCTKIALGHHRDDIETLFFLNLFYHAKLSAMPKKL  
tr|A0A1I1VSU3|A0A1I1VSU3\_9DELT . . . . . A. GKAY. CSLCSRLRRGILY. DVAVELGCTKIALGHHRDDIETLFFLNLFYHAKLSAMPKKL  
tr|A0A2E4FKB0|A0A2E4FKB0\_9BACT . . . . . E. TATP. CSLCARLRRGVLY. RIAATDVGATKIALGHHRDDIETLFFLNLFYHAKLSAMPKKL  
tr|I4B8F4|I4B8F4\_TURPD . . . . . A. GQTF. CSLCSRLRRGILY. DEAEELGATKIALGHHRDDIETLFFLNLFYHAKLSAMPKKL  
tr|A0A1F2TDP4|A0A1F2TDP4\_9BACT . . . . . G. GATP. CSLCARLRRGVLY. RLAADELGATKIALGHHRDDIVETLFFLNLFYHAKLSAMPKKL  
tr|A0A2V8IUM8|A0A2V8IUM8\_9BACT . . . . . E. SATP. CSLCARLRRGILY. RLATKVGATKIALGHHRDDIETLFFLNLFYHAKLSAMPKKL  
tr|A0A2E6ZRN2|A0A2E6ZRN2\_9BACT . . . . . A. QATP. CSLCARLRRGVLY. RVASAVGATKIALGHHRDDIETLFFLNLFYHAKLSAMPKKL  
tr|A0A2S9XKB3|A0A2S9XKB3\_9DELT . . . . . P. GKAY. CSLCSRLRRGILY. DVAAELGATKIALGHHRDDIETLFFLNLFYHAKLSAMPKKL  
tr|A0A2E7BN06|A0A2E7BN06\_9BACT . . . . . A. RATP. CSLCARLRRGVLY. RMATEVGATKIALGHHRDDIETLFFLNLFYHAKLSAMPKKL  
tr|A0A2E8E785|A0A2E8E785\_9BACT . . . . . A. RATP. CSLCARLRRGVLY. RVARDVGATKIALGHHRDDIETLFFLNLFYHAKLSAMPKKL  
tr|K9WKS1|K9WKS1\_9CYAN . . . . . E. GKTM. CGLCSRLRRGILY. RVASEEGATKIALGHHRDDIETLFFLNLFYHAKLSAMPKKL  
tr|A0A2E6NIN2|A0A2E6NIN2\_9BACT . . . . . A. KATP. CSLCARLRRGVLY. RLAAEVDGATKIALGHHRDDIETLFFLNLFYHAKLSAMPKKL  
sp|A1AUS1|TTCA\_PELPD . . . . . P. GSYS. CSICARLRRGILY. GLADSGCTKIALGHHRDDIETLFFLNLFYHAKLSAMPKKL  
tr|A0A1W9N6M0|A0A1W9N6M0\_9SPIO . . . . . E. GDIP. CALCSRLRRGILY. AAARENGFNKVALGHHRDDIVETLFFLNLFYHAKLSAMPKKL  
tr|A0A1G0HG69|A0A1G0HG69\_9GAMM . . . . . E. GKTY. CSLCSRLRRGILY. RYAAENGFNKVALGHHRDDIETLFFLNLFYHAKLSAMPKKL  
tr|A0A257KZN9|A0A257KZN9\_9BURK . . . . . A. GKTM. CSLCSRLRRGILY. RVAGELGATKIALGHHRDDIVETLFFLNLFYHAKLSAMPKKL  
tr|A0A017SU25|A0A017SU25\_9DELT . . . . . E. NKTY. CSLCSRLRRGILY. RLAADELGATKIALGHHRDDIETLFFLNLFYHAKLSAMPKKL  
tr|A0A2E5NNL5|A0A2E5NNL5\_9PROT . . . . . E. GKTM. CGLCSRLRRGVLY. RVAAELGATKIALGHHRDDIVETLFFLNLFYHAKLSAMPKKL  
tr|H2CFU5|H2CFU5\_9LEPT . . . . . P. GKTY. CAVCSRLRRGILY. RLAAERDGNVIALGHHREDMVITLFFLNAMFAGKLSAMPKKL



|                                |           |               |                  |            |               |              |            |             |        |
|--------------------------------|-----------|---------------|------------------|------------|---------------|--------------|------------|-------------|--------|
| tr A0A2V6RG95 A0A2V6RG95_9BACT | . . . . . | . H. G. . . . | . CDVCSRRHRRRTLY | . QVAAEL   | . GCTTALGHTA  | . ADDCAEALL  | . LRNLFFN  | . GRITASLP  | . PVPA |
| tr A0A2E9Q744 A0A2E9Q744_9SPIO | . . . . . | . E. GKTY     | . CAVCSRRMRGILY  | . RLAREL   | . GCNRIALGHH  | . REDLLST    | . FLMNAFFN | . NGKLGSM   | . PVPY |
| tr A0A1F2R952 A0A1F2R952_9BACT | . . . . . | . A. DQTP     | . CSLCARLRRGVLY  | . RVAREV   | . GATKIALGHHM | . DDFIETLL   | . LNLFFA   | . GALAKAMP  | . PAKL |
| tr V5WDR6 V5WDR6_9SPIO         | . . . . . | . D. GKPG     | . CSLCSRLRRGALY  | . STAARV   | . GADKIALGHH  | . DDFIETLL   | . LNLFFG   | . GTLKTMP   | . PKKL |
| tr A0A2V8GAJ7 A0A2V8GAJ7_9BACT | . . . . . | . A. DADP     | . CSLCARFRRCVLY  | . RIATEV   | . GATKIALGHH  | . DDFIETLL   | . LNLFFA   | . GSKLGAMP  | . PAKL |
| tr A0A2J6J4V4 A0A2J6J4V4_9DELT | . . . . . | . P. GSSY     | . CAFCARLRRGALY  | . TAAITELN | . CNKIALGHHM  | . DDVIETLL   | . LNFQFYS  | . GSKLGAMP  | . PRV  |
| tr A0A2N2FXA6 A0A2N2FXA6_9DELT | . . . . . | . P. GTSY     | . CSFCARLRRGALY  | . NVQAORL  | . GCNKIALGHH  | . LDDFIETLL  | . LNFQFYI  | . GRILAAMS  | . PKKL |
| tr A0A2N6FC22 A0A2N6FC22_9DELT | . . . . . | . P. GSSY     | . CAFCARLRRGVLY  | . TLAADHL  | . GCNKVALGHH  | . CDDFIETLL  | . LNFQFV   | . VGRILAAMS | . SKM  |
| tr A0A2V8UJY0 A0A2V8UJY0_9BACT | . . . . . | . H. G. . . . | . CDLCSRYRRRAVY  | . EIAARGL  | . GANVIAFGHTA | . DDFFCEALL  | . LRNTMFT  | . TGRLSALP  | . PVT  |
| tr A0A1T4JZQ3 A0A1T4JZQ3_9DELT | . . . . . | . P. GSSY     | . CSFCARLKRGLY   | . GAARRL   | . GCNLIALGHH  | . DDFIETLL   | . LNFQFI   | . IGTLKAMAA | . AKT  |
| tr M4VBX7 M4VBX7_9PROT         | . . . . . | . . DGVS      | . CSLCSKMRRALY   | . DYAFDNKF | . SKMALGHH    | . DDVIETLL   | . LNLFFYV  | . GQLSTMP   | . PKKL |
| tr A0A1L3GE40 A0A1L3GE40_PELAE | . . . . . | . P. GSSV     | . CAFCARLRRGALY  | . SVADR    | . GCNKIALGHH  | . LDDFIETLL  | . LNFQFV   | . TGRILAAMS | . SARL |
| tr A0A2V7HPH4 A0A2V7HPH4_9BACT | . . . . . | . H. G. . . . | . CDVCSRRHRRGALY | . RVAAEI   | . GATVIALGHTA | . DDCAEALL   | . LRNLFFN  | . GRITASLP  | . PVPA |
| tr A0A2N9LW04 A0A2N9LW04_9BACT | . . . . . | . H. G. . . . | . CDLCSRYRRRAVY  | . EIAHSL   | . GANVIAFGHTA | . DDFFCEALL  | . LRNTMFT  | . TGRLSALP  | . PVT  |
| tr A0A2F0ART3 A0A2F0ART3_9DELT | . . . . . | . D. GKAY     | . CSLCSRRMRGILY  | . RQAEEL   | . GANKVALGHH  | . DDLIETLL   | . LNFQFYS  | . GRVRSMA   | . PAKL |
| tr A0A1F9PW08 A0A1F9PW08_9DELT | . . . . . | . P. GSSY     | . CSFCARLRRGALY  | . VVAEQL   | . GCNKIALGHH  | . LDDFIETLL  | . LNFQFYV  | . TGRLGAM   | . SKM  |
| tr A0A212PKL4 A0A212PKL4_9DELT | . . . . . | . P. GSSY     | . CSICARLKRGLY   | . TLAQRL   | . GCNKIALGHH  | . LDDFIETLL  | . LNFQFV   | . GSKLGAM   | . PSM  |
| tr A0A1E7IDL2 A0A1E7IDL2_9DELT | . . . . . | . P. GTSY     | . CAFCARLRRGALY  | . ATATKLS  | . CNKVALGHH   | . DDHIETLL   | . LNFQFYS  | . GTLAAMS   | . PKKL |
| tr A0A1F4K9T7 A0A1F4K9T7_9BURK | . . . . . | . E. GKTM     | . CSLCSRLRRGILY  | . RVADELKI | . TKIALGHH    | . DDMLQTF    | . FLNMFFG  | . GKIKGMP   | . PKKL |
| tr A0A1V6G367 A0A1V6G367_9BACT | . . . . . | . Q. GGQ      | . CSACSRLRRGVLY  | . SQARRL   | . GCAKVALGHH  | . DDVAETLL   | . LNMFFY   | . CGRIQSM   | . PARY |
| tr A0A1V6GTQ7 A0A1V6GTQ7_9DELT | . . . . . | . D. DKDP     | . CSACSRLRRGALY  | . GLAEER   | . GSSIALGHHM  | . DDVIETFF   | . LRCLYT   | . TQGLGAMA  | . PAR  |
| tr A0A2V7EYK5 A0A2V7EYK5_9BACT | . . . . . | . H. G. . . . | . CDVCSRRHRRALY  | . RLAAEL   | . GCTTALGHTA  | . DDCAESLL   | . LRNLFFN  | . GRITASLP  | . PVPA |
| tr A0A2K2H7P2 A0A2K2H7P2_9DELT | . . . . . | . P. GSSY     | . CSFCARLRRGILY  | . SLADEL   | . GCNKIALGHH  | . LDDFIETLL  | . LNFQFYV  | . GSKLGAM   | . SKM  |
| tr A0A1F7NH02 A0A1F7NH02_9BACT | . . . . . | . H. G. . . . | . CEVCSRRHRRSALY | . RIAAER   | . GCTVIALGHTA | . DDCAEALL   | . LRNLFFN  | . FNGRIVSL  | . PVPA |
| tr A0A0B5FS20 A0A0B5FS20_9DELT | . . . . . | . P. GTSF     | . CAFCARLRRGALY  | . SLADR    | . CNKIALGHH   | . LDDFIETLL  | . LNFQFYI  | . GRILAAMS  | . PKKL |
| tr A0A2V6ULT5 A0A2V6ULT5_9BACT | . . . . . | . H. G. . . . | . CDVCSRRHRRALY  | . RLAAEL   | . GCTTALGHTA  | . DDCAESLL   | . LRNLFFN  | . GRITASLP  | . PVPA |
| tr A0A2V6Y9C3 A0A2V6Y9C3_9BACT | . . . . . | . H. G. . . . | . CDVCSRRHRRALY  | . RLAAEL   | . GCTTALGHTA  | . DDCAESLL   | . LRNLFFN  | . GRITASLP  | . PVPA |
| tr A0A2N6EF94 A0A2N6EF94_9DELT | . . . . . | . P. GSSY     | . CAFCARLRRGVLY  | . TVADR    | . GCNKIALGHH  | . LDDFIETLL  | . LNFQFYV  | . TGRLGAM   | . SKM  |
| tr A0A0A8RJ9R A0A0A8RJ9R_PSEAI | . . . . . | . E. GKTT     | . CSLCSRLRRGTYL  | . TFADEI   | . GATKMALGHH  | . DDVIETFF   | . LNMFFG   | . GSKLGAM   | . PAKL |
| tr A0A0P9TR35 A0A0P9TR35_PSEAV | . . . . . | . E. GKTT     | . CSLCSRLRRGTYL  | . TFADEI   | . GATKMALGHH  | . DDVIETFF   | . LNMFFG   | . GSKLGAM   | . PAKL |
| tr A0A2D7N717 A0A2D7N717_9GAMM | . . . . . | . E. GKTT     | . CALCSRLRRGTYL  | . GFAEAN   | . GVTKIALGHH  | . DDVIETFF   | . LNLFFG   | . GSKLGAM   | . PAKL |
| tr A0A2E4KXY4 A0A2E4KXY4_9GAMM | . . . . . | . E. GKTT     | . CALCSRLRRGTYL  | . GFAEAN   | . GVTKIALGHH  | . DDVIETFF   | . LNLFFG   | . GSKLKT    | . MPKL |
| tr A0A2U2AFP2 A0A2U2AFP2_9GAMM | . . . . . | . E. GKTT     | . CSLCSRLRRGVLY  | . QYAKDR   | . FNKIALGHH   | . DDVMVETL   | . FLNMFFY  | . GGTMKSM   | . PAKL |
| tr A0A1Z9WNU8 A0A1Z9WNU8_9GAMM | . . . . . | . E. GKTT     | . CALCSRLRRGTYL  | . GFABTN   | . GVTKIALGHH  | . DDVIETFF   | . LNLFFG   | . GSKMT     | . MPKL |
| tr A0A0K2G7B2 A0A0K2G7B2_NITMO | . . . . . | . E. GQTT     | . CSLCSRLRRGTYL  | . RIAAGEL  | . GATKIALGHH  | . DDVIETFF   | . LNLFFY   | . TGLKLAIP  | . PKKL |
| tr A0A2M6X3K2 A0A2M6X3K2_9PROT | . . . . . | . N. GAVP     | . CALCSRLRRGTYL  | . GMAAANK  | . CNKIALGHH   | . KDDFIETLL  | . LNFQFYG  | . IRIGAMA   | . PAKL |
| tr A0A1V5R0W3 A0A1V5R0W3_9BACT | . . . . . | . E. ITTP     | . CAMCSRLRRGVLY  | . THAKTR   | . GYTKIALGHH  | . LDDVIETLL  | . LNFQFYS  | . GRLST     | . MPKL |
| tr X0QN96 X0QN96_9GAMM         | . . . . . | . E. GKTY     | . CSACSRLRRGSY   | . GFAKQI   | . GATKIALGHH  | . DDMLATFF   | . LNLFFHG  | . GALKSM    | . PAKL |
| tr A0A2N2JDQ6 A0A2N2JDQ6_9DELT | . . . . . | . A. GKTY     | . CSLCSRLRRGILY  | . DVAVEL   | . GATRIALGHH  | . DDIIETLL   | . LNLFFY   | . GQLKAMP   | . PIL  |
| tr A0A1Z5JK72 A0A1Z5JK72_FISSO | . . . . . | . P. GKTY     | . CTVC SRLRGILY  | . SKATL    | . GCNKITLGH   | . AADDIETLL  | . LNMHIG   | . GQLSAMP   | . PAKL |
| tr A6G7U2 A6G7U2_9DELT         | . . . . . | . A. GKAY     | . CSLCSRLRRGILY  | . DVAVEL   | . GATKIALGHH  | . DDVVETLL   | . LNLFFY   | . AGQLKAMP  | . PAKL |
| tr A0A1L6LYW7 A0A1L6LYW7_9DELT | . . . . . | . E. GKTY     | . CSLCSRLRRGILY  | . RLAREM   | . GCTKIALGHH  | . DDATITLL   | . LNLFFS   | . GQLKAMP   | . PAKL |
| tr A0A2N2GUK6 A0A2N2GUK6_9DELT | . . . . . | . D. PKQI     | . CTACARFRGILY   | . DLAFEKRA | . LVLVGH      | . AADDSMETLL | . MNVFFT   | . TGKLOAMP  | . PVL  |
| tr A0A1M3N0E1 A0A1M3N0E1_9DELT | . . . . . | . E. GKTF     | . CSLCSRLRRGILY  | . RVAREL   | . GCTKIALGHH  | . DDILQTL    | . LNLFFAC  | . QLAAMP    | . PAKL |
| tr A0A143PPA8 A0A143PPA8_9BACT | . . . . . | . A. NADP     | . CSLCARLRRGVLY  | . RIAEEE   | . GATKIALGHH  | . LDDFIETLL  | . LNMFFG   | . GALKAMP   | . PARL |
| tr A0A0D6QPU7 A0A0D6QPU7_9DELT | . . . . . | . E. GKTT     | . CPVCSRLRRGVLY  | . NAAVEM   | . GCTKIALGHH  | . DDIVETLL   | . LLSALY   | . GALKSM    | . PAKL |
| tr A0A150QKP6 A0A150QKP6_SORCE | . . . . . | . E. NKTY     | . CSLCSRLRRGILY  | . RIAAREL  | . GCTKIALGHH  | . DDIVETLL   | . LNLFI    | . FAGQLKSM  | . PAKL |
| tr A0A0F6W196 A0A0F6W196_9DELT | . . . . . | . E. ESTY     | . CSLCSRLRRGILY  | . NVAQEL   | . GCTKIALGHH  | . DDIAETLL   | . LNLMTF   | . GSKLGAM   | . PAKL |
| tr A0A2E4F8S9 A0A2E4F8S9_9DELT | . . . . . | . E. GKTY     | . CPLCSRLRRGILY  | . DTAVEL   | . GATKIALGHH  | . DDVIETLL   | . LNLFFYS  | . GQLKAMP   | . PAKL |
| tr A0A2M8BFD6 A0A2M8BFD6_9DELT | . . . . . | . P. EQTT     | . CALCSRLRRGIMY  | . NQAVEL   | . GCTKIALGHH  | . DDSIETLL   | . LNLFFYS  | . GQLKAMP   | . PAKL |
| tr A0A2D9HEL4 A0A2D9HEL4_9DELT | . . . . . | . E. GRSTY    | . CSLCSRLRRGILY  | . DQAEAL   | . GCTKIALGHH  | . DDAAETLL   | . LNLFFYS  | . GQLKSM    | . PAKL |
| tr A0A2E7BRH0 A0A2E7BRH0_9DELT | . . . . . | . E. GSTY     | . CSLCSRLRRGILY  | . DQAEAL   | . GCTKIALGHH  | . DDAAETLL   | . LNLFFYS  | . GQLKSM    | . PLL  |
| tr A0A2E7MCK4 A0A2E7MCK4_9DELT | . . . . . | . E. GDY      | . CSLCSRLRRGSY   | . SAAAELE  | . CNKIALGHH   | . AADAIETLL  | . LNLMTF   | . TGLKTM    | . PAWL |
| tr A0A2T5ZGX2 A0A2T5ZGX2_PSED  | . . . . . | . E. GRTT     | . CSLCSRLRRGTYL  | . TFADEI   | . GATKMALGHH  | . DDVIETFF   | . LNMFFG   | . QSKIGAM   | . PAKL |
| tr A0A2P9H6T1 A0A2P9H6T1_9BURK | . . . . . | . E. GKTT     | . CSLCSRLRRGVLY  | . RVAGEL   | . GATKIALGHH  | . DDILGTF    | . LNLFFY   | . GRIKAMP   | . PAKL |
| tr A0A2N9LJS7 A0A2N9LJS7_9BURK | . . . . . | . D. GKTT     | . CSLCSRLRRGVLY  | . RVASEL   | . GATKIALGHH  | . DDILGTF    | . LNLFFY   | . GRIKAMP   | . PAKL |
| tr E7S057 E7S057_9BURK         | . . . . . | . D. GKTK     | . CSLCSRLRRGILY  | . RVASEL   | . GATRIALGHH  | . DDILATFF   | . LNLFFY   | . GQLKTM    | . PAKL |
| tr A0A2A4P8Z1 A0A2A4P8Z1_9RHIZ | . . . . . | . A. GKTY     | . CSLCSRLRRGILY  | . RVAKEN   | . CSVVGLGHH   | . DDIAETLL   | . LNLFFG   | . GRMAAMP   | . PAKL |
| tr A0A0M7AI61 A0A0M7AI61_9RHOB | . . . . . | . E. HRTY     | . CSLCSRLRRGILY  | . RIAAREQ  | . GCEAIVLGH   | . DDIIETFF   | . MNLFHG   | . GRLASMP   | . PAKL |
| tr B9QZY1 B9QZY1_LABAD         | . . . . . | . E. HRTY     | . CSLCSRLRRGILY  | . RVAREEQ  | . GCEAIVLGH   | . DDIIETFF   | . MNLFHG   | . GRLASMP   | . PAKL |
| tr A0A2E8PN43 A0A2E8PN43_9RHOB | . . . . . | . E. GRSTY    | . CALCSRLRRGILY  | . RIAAREEQ | . GCAVVLGHH   | . DDIIETFF   | . MNLFHG   | . GRLATMP   | . PAKL |
| tr A0A0U3Q6R9 A0A0U3Q6R9_9RHOB | . . . . . | . A. HKTY     | . CSLCSRLRRGILY  | . RIAAREEQ | . GCEAIVLGH   | . DDIIETFF   | . MNLFHG   | . GRLASMP   | . PAKL |
| tr Q0FM23 Q0FM23_PELBH         | . . . . . | . Q. GRTF     | . CALCSRLRRGILY  | . RIAAREEQ | . GCAVVLGHH   | . DDIIETFF   | . MNLFHG   | . GRLATMP   | . PAKL |
| tr A0A285NGN7 A0A285NGN7_9RHIZ | . . . . . | . E. GNTY     | . CSLCSRLRRANLY  | . RVAREH   | . GCDALVLGH   | . DDIIETFF   | . MNLFHG   | . GRLASMP   | . PAKL |
| tr A0A1H1I26 A0A1H1I26_9RHOB   | . . . . . | . E. NSTY     | . CSLCSRLRRGILY  | . RTAREL   | . GCEAIVLGH   | . DDIIETFF   | . MNLFHG   | . GRMSSMP   | . PAKL |
| tr A0A1U7JKQ3 A0A1U7JKQ3_9RHOB | . . . . . | . E. NRTY     | . CSLCSRLRRGILY  | . RIAAREEQ | . GCEAIVLGH   | . DDIIETFF   | . MNLFHG   | . GRMSSMP   | . PAKL |
| tr A0A2T5VDC0 A0A2T5VDC0_9RHIZ | . . . . . | . A. GQTY     | . CSLCSRLRRGILY  | . RIAAREEQ | . GCEAIVLGH   | . DDIIETFF   | . LNLFFY   | . GRLAAMP   | . PAKL |
| tr A0A1X0T5T9 A0A1X0T5T9_9RHIZ | . . . . . | . D. NATY     | . CSLCSRLRRGHLY  | . RIAAREEQ | . GCEAIVLGH   | . DDIIETFF   | . MNLFHG   | . GRLSAMP   | . PAKL |
| tr A0A1J0WLM9 A0A1J0WLM9_9RHOB | . . . . . | . A. NRTF     | . CALCSRLRRGHLY  | . RIAAREEQ | . GCEAIVLGH   | . DDIIETFF   | . MNLFHG   | . GRLATMP   | . PAKL |
| tr A0A068D919 A0A068D919_9RHIZ | . . . . . | . Q. GSTY     | . CSLCSRLRRGHLY  | . RIAAREEQ | . GCEAIVLGH   | . DDIIETFF   | . MNLFHG   | . GRLAAMP   | . PAKL |
| tr A0A1M7GB07 A0A1M7GB07_9RHOB | . . . . . | . A. HRTY     | . CSLCSRLRRGILY  | . RIAAREEQ | . GCEAIVLGH   | . DDIIETFF   | . MNLFHG   | . GRLASMP   | . PAKL |
| tr F2J474 F2J474_POLGS         | . . . . . | . A. HKTY     | . CSLCSRLRRGILY  | . RIAAREEQ | . GCEAIVLGH   | . DDIIETFF   | . MNLFHG   | . GRLASMP   | . PAKL |
| tr A0A2N5XWE2 A0A2N5XWE2_9RHIZ | . . . . . | . E. GKTY     | . CSLCSRLRRGILY  | . RVAREH   | . GCDALVLGH   | . DDIIETFF   | . MNLFHG   | . GRLATMP   | . PAKL |
| tr A0A165N2M5 A0A165N2M5_9RHOB | . . . . . | . E. TSTY     | . CSLCSRLRRGILY  | . RTAREL   | . GCEAIVLGH   | . DDIIETFF   | . MNLFHG   | . GRMASMP   | . PAKL |
| tr F0L6P6 F0L6P6_AGRSH         | . . . . . | . A. GGTY     | . CSLCSRLRRGILY  | . RIAAREEQ | . GCDALVLGH   | . DDIIETFF   | . MNLFHG   | . GRLAGMP   | . PAKL |
| tr A0A2E3JZ33 A0A2E3JZ33_9RHOB | . . . . . | . E. GRTF     | . CSMCSRLRRGILY  | . RIAAREEQ | . GCDALVLGH   | . DDIIETFF   | . MNLFHG   | . GRLAAMP   | . PAKL |
| tr A0A1Z8X2N2 A0A1Z8X2N2_9RHIZ | . . . . . | . A. KQTY     | . CALCSRLRRGILY  | . RIAAREND | . QCAVVLGH    | . DDIIETFF   | . LNLFFHG  | . GRLSTMP   | . PAKL |
| tr A0A1L3L3G5 A0A1L3L3G5_9RHIZ | . . . . . | . T. GATY     | . CSLCSRLRRGILY  | . RVAREEQ  | . GCDALVLGH   | . DDIIETFF   | . MNLFHG   | . GRLASMP   | . PAKL |
| tr A0A0M6YMA0 A0A0M6YMA0_9RHOB | . . . . . | . E. NKTY     | . CSLCSRLRRGILY  | . RIAAREEQ | . GCEAIVLGH   | . DDIIETFF   | . MNLFHG   | . GRLASMP   | . PAKL |
| tr A0A2S3UK45 A0A2S3UK45_9RHOB | . . . . . | . A. HRTY     | . CSLCSRLRRGILY  | . RVAREEQ  | . GCEAIVLGH   | . DDIIETFF   | . MNLFHG   | . GRLASMP   | . PAKL |
| tr A0A062UNB4 A0A062UNB4_9RHOB | . . . . . | . A. GRSTY    | . CSMCSRLRRGILY  | . RIAAREEQ | . GCEAIVLGH   | . DDIIETFF   | . MNLFHG   | . GRMAAMP   | . PAKL |
| tr A0A1H2GV68 A0A1H2GV68_9RHOB | . . . . . | . E. GKTY     | . CSLCSRLRRGHLY  | . RIAAREEQ | . GCEAIVLGH   | . DDIIETFF   | . MNLFHG   | . GRLSSMP   | . PAKL |
| tr U4V1M4 U4V1M4_9RHOB         | . . . . . | . E. GRTF     | . CALCSRLRRGHLY  | . RIAAREEQ | . GCEAIVLGH   | . DDIIETFF   | . MNLFHG   | . GRLATMP   | . PAKL |
| tr A0A2E2JQJ5 A0A2E2JQJ5_9RHOB | . . . . . | . E. GRTF     | . CALCSRLRRGHLY  | . RIAAREEQ | . GCEAIVLGH   | . DDIIETFF   | . MNLFHG   | . GRLATMP   | . PAKL |
| tr A0A0Q2U912 A0A0Q2U912_9RHOB | . . . . . | . Q. GRLL     | . CTMC SRLRRANLY | . RVAREEQ  | . GCEAIVLGH   | . DDIIETFF   | . MNLFHG   | . GSKLATMP  | . PAKL |
| tr A0A1I3NRT7 A0A1I3NRT7_9RHOB | . . . . . | . A. GRSTY    | . CALCSRLRRGILY  | . RIAAREEQ | . GCEAIVLGH   | . DDIIETFF   | . LNLFFHG  | . GRLASMP   | . PAKL |
| tr E2CME8 E2CME8_9RHOB         | . . . . . | . A. HRTY     | . CSLCSRLRRGILY  | . RVAREEQ  | . GCEAIVLGH   | . DDIIETFF   | . MNLFHG   | . GRLASMP   | . PAKL |
| tr A0A1H8KDM8 A0A1H8KDM8_9RHOB | . . . . . | . P. GKTM     | . CSLCSRLRRGILY  | . RIAAREEQ | . GCEAIVLGH   | . DDIIETFF   | . MNLFHG   | . GRLATMP   | . PAKL |
| tr A0A2E6Y209 A0A2E6Y209_9RHOB | . . . . . | . A. GKTY     | . CSLCSRLRRGILY  | . RTAREEQ  | . GCEAIVLGH   | . DDIIETFF   | . MNLFHG   | . GRLASMP   | . PAKL |
| tr A0A285R4U2 A0A285R4U2_9RHOB | . . . . . | . E. GRSTY    | . CSLCSRLRRGILY  | . RTAREEQ  | . GCEAIVLGH   | . DDIIETFF   | . MNLFHG   | . GRLSSMP   | . PAKL |
| tr A0A2E2X6Z9 A0A2E2X6Z9_9RHIZ | . . . . . | . E. TATY     | . CALCSRLRRGHLY  | . RVAREEQ  | . GCEAIVLGH   | . DDIIETFF   | . LNLFFHG  | . GRLASMP   | . PAKL |
| tr A0A2A4NQL7 A0A2A4NQL7_9RHIZ | . . . . . | . Q. GQTY     | . CALCSRLRRGILY  | . RIAAREEQ | . GCEAIVLGH   | . DDIIETFF   | . MNLFHG   | . GRLAAMP   | . GKL  |
| tr A0A1M4N2C9 A0A1M4N2C9_9RHOB | . . . . . | . Q. GRSTY    | . CALCSRLRRGILY  | . RIAAREEQ | . GCEAIVLGH   | . DDIIETFF   | . MNLFHG   | . GRLATMP   | . PAKL |
| tr A0A1Y5S675 A0A1Y5S675_9RHOB | . . . . . | . A. GRSTY    | . CALCSRLRRANLY  | . RVAREEQ  | . GCEAIVLGH   | . DDIIETFF   | . MNLFHG   | . GRLATMP   | . PAKL |
| tr A0A1M5MIW3 A0A1M5MIW3_9RHOB | . . . . . | . A. GRSTY    | . CALCSRLRRGILY  | . RIAAREEQ | . GCEAIVLGH   | . DDIIETFF   | . MNLFHG   | . GRLATMP   | . PAKL |
| tr A0A1G9EC22 A0A1G9EC22_9RHOB | . . . . . | . Q. GRSTY    | . CALCSRLRRGHLY  | . RIAAREEQ | . GCEAIVLGH   | . DDIIETFF   | . LNLFFHG  | . GRLATMP   | . PAKL |
| tr A0A2T5BNF4 A0A2T5BNF4_9RHOB | . . . . . | . Q. GRSTY    | . CALCSRLRRGHLY  | . RIAAREEQ | . GCEAIVLGH   | . DDIIETFF   | . MNLFHG   | . GRLATMP   | . PAKL |
| tr A0A1H8VKC4 A0A1H8VKC4_9RHOB | . . . . . | . E. GRTF     | . CALCSRLRRGHLY  | . RVAREEQ  | . GCEAIVLGH   | . DDIIETFF   | . MNLFHG   | . GRLATMP   | . PAKL |
| tr A0A2R8AP84 A0A2R8AP84_9RHOB | . . . . . | . A. GRSTY    | . CALCSRLRRGILY  | . RIAAREEQ | . GCEAIVLGH   | . DDIIETFF   | . MNLFHG   | . GRLATMP   | . PAKL |
| tr A0A1H9X6V8 A0A1H9X6V8_9RHOB | . . . . . | . E. GRTF     | . CALCSRLRRGHLY  | . RIAAREEQ | . GCEAIVLGH   | . DDIIETFF   | . MNLFHG   | . GRLATMP   | . PAKL |
| tr A0A1V0PXW0 A0A1V0PXW0_9RHOB | . . . . . | . A. GRSTY    | . CALCSRLRRGILY  | . RIAAREEQ | . GCEAIVLGH   | . DDIIETFF   | . MNLFHG   | . GRLATMP   | . PAKL |
| tr A3JN68 A3JN68_9RHOB         | . . . . . | . A. GRTF     | . CSLCSRLRRSHLY  | . RIAAREEQ | . GCEAIVLGH   | . DDIIETFF   | . MNLFHG   | . GRLATMP   | . PAKL |
| tr A0A1I1TL21 A0A1I1TL21_9RHOB | . . . . . | . A. GRTF     | . CALCSRLRRGHLY  | . RIAAREEQ | . GCEAIVLGH   | . DDIIETFF   | . MNLFHG   | . GRLATMP   | . PAKL |



|                                |           |       |    |              |    |     |       |   |            |   |        |    |        |   |    |   |   |   |   |   |   |   |
|--------------------------------|-----------|-------|----|--------------|----|-----|-------|---|------------|---|--------|----|--------|---|----|---|---|---|---|---|---|---|
| tr A0A177HD71 A0A177HD71_9RHOB | . . . . . | E. GR | TF | CALCSRLRRGN  | LY | .RI | AREEN | C | SAIVLGHH   | R | DDILET | FF | MNLFH  | G | GR | L | A | M | P | A | K | L |
| tr A0A2U2C7M4 A0A2U2C7M4_9RHOB | . . . . . | Q. GR | TY | CALCSRLRRGN  | LY | .RI | AREE  | G | TSVVLGHH   | R | DDMLET | FF | MNLFH  | G | GR | L | A | M | P | P | K | L |
| tr A0A285CPF5 A0A285CPF5_9RHOB | . . . . . | Q. GR | TY | CALCSRLRRGN  | LY | .RI | AREE  | G | SAVVLGHH   | R | DDILET | FF | MNLFH  | G | GR | L | A | M | P | P | R | L |
| tr A0A0P7Z0L9 A0A0P7Z0L9_9RHOB | . . . . . | E. GR | TY | CALCSRLRRGH  | LY | .RV | AREE  | G | SAVVLGHH   | R | DDILET | FF | MNLFH  | G | GR | L | A | M | P | P | K | L |
| tr A9D6D1 A9D6D1_HOEPD         | . . . . . | E. GA | TY | CALCSRLRRGH  | LY | .RI | AREE  | G | QALVLGHH   | R | DDILET | FF | LNLFH  | G | GR | L | A | M | P | P | K | L |
| tr A0A1G5P8R9 A0A1G5P8R9_AFIMA | . . . . . | P. GQ | TM | CALCSRLRRGH  | LY | .RV | AREE  | G | QAVVLGHH   | R | EDALET | FF | MNLMNG | H | GR | L | A | M | P | P | K | L |
| tr A0A1H9PDF7 A0A1H9PDF7_9RHIZ | . . . . . | A. GG | TY | CALCSRLRRGN  | LY | .RI | AREE  | G | CDALVLGHH  | R | EDILET | FF | MNFFH  | G | GR | L | A | M | P | P | K | L |
| tr A0A2E2JGB1 A0A2E2JGB1_9RHIZ | . . . . . | S. NA | TY | CALCSRLRRGN  | LY | .RI | AREE  | G | CEALVLGHH  | A | DDCLET | FF | MNLFH  | G | GR | L | A | M | P | P | K | L |
| tr A0A1V3YQY0 A0A1V3YQY0_9RHIZ | . . . . . | E. TS | TY | CALCSRLRRGN  | LY | .RI | AREE  | G | CAIVLGHH   | R | EDILET | FF | MNLFH  | G | GR | L | A | M | P | P | K | L |
| tr A0A1S2E4H9 A0A1S2E4H9_AGRVI | . . . . . | A. GG | TY | CALCSRLRRGN  | LY | .RI | AREE  | G | CDALVLGHH  | R | EDILET | FF | MNFFH  | G | GR | L | A | M | P | P | K | L |
| tr A0A1R3WLL8 A0A1R3WLL8_9RHOB | . . . . . | Q. GR | TY | CALCSRLRRGN  | LY | .RI | AREE  | G | CCAIVLGHH  | R | DDILET | FF | MNLFH  | G | GR | L | A | M | P | P | K | L |
| tr A0A2S0UI27 A0A2S0UI27_9RHOB | . . . . . | Q. GR | TY | CALCSRLRRGN  | LY | .RI | AREE  | G | CTAVVLGHH  | R | DDILET | FF | MNLFH  | G | GR | L | A | M | P | P | K | L |
| tr A0A2K9MBC8 A0A2K9MBC8_9RHOB | . . . . . | P. GG | TM | CALCSRLRRGN  | LY | .RI | AREE  | G | CTAVVLGHH  | R | DDMLET | FF | LNLFH  | G | GR | L | A | M | P | P | K | L |
| tr A0A1X6YHS3 A0A1X6YHS3_9RHOB | . . . . . | Q. GR | TM | CALCSRLRRAN  | LY | .RV | AREE  | G | CTAVVLGHH  | R | DDMLET | FF | LNLFH  | G | GK | I | A | M | P | P | K | L |
| tr A0A1N6SMB1 A0A1N6SMB1_9RHOB | . . . . . | Q. GR | TY | CALCSRLRRGN  | LY | .RI | AREE  | G | CTAVVLGHH  | R | DDILET | FF | MNLFH  | G | GR | L | A | M | P | P | K | L |
| tr C6XN75 C6XN75_HTRBI         | . . . . . | A. KA | TY | CALCSRLRRGIL | Y  | .NA | AREE  | G | CDALVLGHH  | R | DDALET | FF | MNLFH  | G | GR | L | A | M | P | P | T | L |
| tr S5XXH0 S5XXH0_PARAH         | . . . . . | E. GQ | TM | CALCSRLRRGN  | LY | .RV | AREE  | G | CTAVVLGHH  | R | DDILET | FF | MNLFH  | G | GR | L | A | M | P | P | K | L |
| tr A0A1H3KW70 A0A1H3KW70_9RHOB | . . . . . | A. GR | TY | CALCSRLRRAN  | LY | .RV | AREE  | G | CTSVVLGHH  | R | DDILET | FF | LNLFH  | G | GK | I | A | M | P | P | K | L |
| tr A0A059IKQ8 A0A059IKQ8_9RHOB | . . . . . | A. GR | TY | CALCSRLRRGN  | LY | .RI | AREE  | G | CTAVVLGHH  | R | DDILET | FF | MNLFH  | G | GR | L | A | M | P | P | K | L |
| tr A0A1N6XFJ9 A0A1N6XFJ9_9RHIZ | . . . . . | E. GA | TY | CALCSRLRRGN  | LY | .RV | AREE  | G | CDALVLGHH  | R | DDILET | FF | MNLFH  | G | GR | L | A | M | P | P | K | L |
| tr A0A0M6YL60 A0A0M6YL60_9RHOB | . . . . . | A. GR | TY | CALCSRLRRAN  | LY | .RV | AREE  | G | CTSVVLGHH  | R | DDILET | FF | LNLFH  | G | GK | I | A | M | P | P | K | L |
| tr A0A2T0JVE2 A0A2T0JVE2_9RHIZ | . . . . . | P. GS | TY | CALCSRLRRGH  | LY | .RI | AREE  | G | CDALVLGHH  | R | EDILET | FF | MNLFH  | G | GK | L | A | M | P | P | K | L |
| tr A0A1Z9YBL5 A0A1Z9YBL5_9RHOB | . . . . . | E. TK | TY | CALCSRLRRGIL | Y  | .RV | AREE  | G | CDALVLGHH  | L | DDALQT | FF | MNLFH  | G | GR | L | A | M | P | P | K | L |
| tr A0A2V2L9E5 A0A2V2L9E5_9RHOB | . . . . . | A. GR | TY | CALCSRLRRGN  | LY | .RI | AREE  | G | CTAVVLGHH  | R | DDILET | FF | MNLFH  | G | GR | L | A | M | P | P | K | L |
| tr A0A0F7PGS5 A0A0F7PGS5_9RHIZ | . . . . . | E. GA | TY | CALCSRLRRGN  | LY | .RI | AREE  | G | CEALVLGHH  | R | DDILET | FF | LNFFH  | G | GR | L | A | M | P | P | K | L |
| tr A0A1N7KET0 A0A1N7KET0_9RHOB | . . . . . | E. GQ | TY | CALCSRLRRGN  | LY | .RI | AREE  | G | CTAVVLGHH  | R | DDILET | FF | MNLFH  | G | GR | L | A | M | P | P | K | L |
| tr A0A238X8G4 A0A238X8G4_9RHOB | . . . . . | A. GR | TY | CALCSRLRRGN  | LY | .RI | AREE  | G | CTAVVLGHH  | R | DDILET | FF | MNLFH  | G | GR | L | A | M | P | P | K | L |
| tr A0A1H5V5L7 A0A1H5V5L7_9RHOB | . . . . . | Q. GR | TY | CALCSRLRRGN  | LY | .RI | AREE  | G | CTAVVLGHH  | R | DDILET | FF | MNLFH  | G | GR | L | A | M | P | P | K | L |
| tr A0A1ION9B5 A0A1ION9B5_9RHOB | . . . . . | Q. GR | TF | CALCSRLRRGN  | LY | .RI | AREE  | G | CTAVVLGHH  | R | DDILET | FF | MNLFH  | G | GR | L | A | M | P | P | K | L |
| tr A0A2G5K4W6 A0A2G5K4W6_9RHOB | . . . . . | T. GR | TY | CAMCSRLRRGN  | LY | .RI | AREE  | G | CTAVVLGHH  | R | DDMLET | FF | MNLFH  | G | GR | L | A | M | P | P | K | L |
| tr A0A1H8DW48 A0A1H8DW48_9RHOB | . . . . . | E. GR | TF | CALCSRLRRGN  | LY | .RI | AREE  | G | CTAVVLGHH  | R | DDILET | FF | MNLFH  | G | GR | L | A | M | P | P | K | L |
| tr A0A2D5IFK3 A0A2D5IFK3_9RHOB | . . . . . | Q. GR | TY | CALCSRLRRGN  | LY | .RI | AREE  | G | CTAVVLGHH  | R | DDILET | FF | LNLFH  | G | GR | L | A | M | P | P | K | L |
| tr A0A196Q2U3 A0A196Q2U3_9RHOB | . . . . . | E. GR | TF | CALCSRLRRGN  | LY | .RI | AREEN | C | TAIVLGHH   | R | DDILET | FF | MNLFH  | G | GR | L | A | M | P | P | K | L |
| tr A0A2N5B5V1 A0A2N5B5V1_RHILI | . . . . . | E. NS | TY | CALCSRLRRGH  | LY | .RV | AREE  | G | CTAVVLGHH  | R | EDILET | FF | MNLFH  | G | GR | L | A | M | P | P | K | L |
| tr A0A0H1A2J7 A0A0H1A2J7_9RHIZ | . . . . . | E. NR | TY | CALCSRLRRGH  | LY | .RI | AREE  | G | CTAVVLGHH  | R | EDILET | FF | LNLFH  | G | GR | L | A | M | P | P | K | L |
| tr A0A2E0UAR0 A0A2E0UAR0_9RHOB | . . . . . | E. TK | TY | CALCSRLRRGIL | Y  | .RI | AREE  | K | CDALVLGHH  | L | DDALET | FF | MNLFH  | G | GR | L | A | M | P | P | K | L |
| tr A0A0T5NWS8 A0A0T5NWS8_9RHOB | . . . . . | A. GR | TY | CALCSRLRRGH  | LY | .RI | AREE  | G | CTAVVLGHH  | R | DDILET | FF | MNLFH  | G | GR | L | A | M | P | P | K | L |
| tr X7EFV6 X7EFV6_9RHOB         | . . . . . | E. GR | TF | CALCSRLRRGH  | LY | .RV | AREE  | G | CTAVVLGHH  | R | DDILET | FF | MNLFH  | G | GR | L | A | M | P | P | K | L |
| tr A0A2U2CVF2 A0A2U2CVF2_9RHOB | . . . . . | A. GR | TF | CALCSRLRRGN  | LY | .RV | AREE  | G | CTAVVLGHH  | R | DDILET | FF | MNLFH  | G | GR | L | A | M | P | P | K | L |
| tr A0A0P8CS56 A0A0P8CS56_9RHOB | . . . . . | Q. GR | TY | CALCSRLRRGN  | LY | .RI | AREE  | G | CTAVVLGHH  | R | DDILET | FF | LNLFH  | G | GK | L | A | M | P | P | K | L |
| tr A0A246QP25 A0A246QP25_9RHOB | . . . . . | Q. GR | TF | CALCSRLRRGN  | LY | .RV | AREE  | G | CTAVVLGHH  | R | DDILET | FF | MNLFH  | G | GR | L | A | M | P | P | K | L |
| tr A0A086YAQ0 A0A086YAQ0_9RHOB | . . . . . | Q. GR | TM | CALCSRLRRGN  | LY | .RI | AREE  | G | CTAVVLGHH  | R | DDILET | FF | MNLFH  | G | GR | L | A | M | P | P | K | L |
| tr J1JYP4 J1JYP4_9RHIZ         | . . . . . | P. MQ | TY | CALCSRLRRGH  | LY | .RI | AREE  | G | CTAVVLGHH  | R | DDVFET | FF | MNLFH  | G | GR | L | A | M | P | P | K | L |
| tr J1JNT6 J1JNT6_9RHIZ         | . . . . . | H. TQ | TY | CALCSRLRRGN  | LY | .RI | AREE  | K | CTAVVLGHH  | R | DDVLET | FF | MNLFH  | G | GR | L | A | M | P | P | K | L |
| tr A0A1X6YV9 A0A1X6YV9_9RHOB   | . . . . . | A. GR | TF | CALCSRLRRGN  | LY | .RI | AREE  | G | CTAVVLGHH  | R | DDILET | FF | MNLFH  | G | GR | L | A | M | P | P | K | L |
| tr A0A2E4QQZ9 A0A2E4QQZ9_9RHOB | . . . . . | E. GN | TF | CAMCSRLRRGIL | Y  | .RV | AREE  | G | CEALVLGHH  | R | DDSLET | FF | MNLFH  | G | GR | L | A | M | P | P | T | L |
| tr A0A257Y958 A0A257Y958_9RHOB | . . . . . | A. SN | TY | CALCSRLRRGIL | Y  | .RV | AREE  | G | CDALVLGHH  | R | DDILET | FF | MNLFH  | G | GR | L | A | M | P | P | K | L |
| tr A0A2W4P9R4 A0A2W4P9R4_9PROT | . . . . . | E. TS | TY | CALCSRLRRGH  | LY | .RI | AREE  | G | CAALVLGHH  | R | EDILET | FF | LNLFH  | G | GR | L | A | M | P | P | K | L |
| tr A0A1V8RTW8 A0A1V8RTW8_9RHIZ | . . . . . | E. AS | TY | CALCSRLRRGH  | LY | .RV | AREE  | G | CTAVVLGHH  | R | DDILET | FF | LNLFH  | G | GR | L | A | M | P | P | K | L |
| tr A0A1D2SP07 A0A1D2SP07_9RHIZ | . . . . . | E. GS | TY | CALCSRLRRGH  | LY | .RI | AREE  | G | CTSSVLGHH  | R | EDILET | FF | MNLFH  | G | GR | L | A | M | P | P | K | L |
| tr A0A0F9XB85 A0A0F9XB85_9ZZZZ | . . . . . | E. GA | TY | CALCSRLRRGN  | LY | .RI | AREE  | G | CEALVLGHH  | R | DDCLET | FF | MNLFH  | G | GR | L | A | M | P | P | K | L |
| tr A0A2D8BW03 A0A2D8BW03_9RHOB | . . . . . | Q. GR | TY | CALCSRLRRGN  | LY | .RI | AREE  | G | CTAVVLGHH  | R | DDILET | FF | MNLFH  | G | GR | L | A | M | P | P | K | L |
| tr A0A271KQ14 A0A271KQ14_9RHIZ | . . . . . | E. GN | TY | CALCSRLRRGH  | LY | .RI | AREE  | G | CTAVVLGHH  | R | EDILET | FF | MNLFH  | G | GR | L | A | M | P | P | K | L |
| tr Q0G721 Q0G721_9RHIZ         | . . . . . | D. NA | TY | CALCSRLRRGH  | LY | .RI | AREE  | G | CEALVLGHH  | R | DDCLET | FF | LNLFH  | G | GK | L | A | M | P | P | K | L |
| tr A0A2P8NIX3 A0A2P8NIX3_9RHIZ | . . . . . | E. NS | TY | CALCSRLRRGH  | LY | .RI | AREE  | G | CTQALVLGHH | R | EDILET | FF | LMNFFH | G | GR | L | A | M | P | P | K | L |
| tr A0A1H9D3L3 A0A1H9D3L3_9BACT | . . . . . | A. GS | TY | CALCSRLRRGIL | Y  | .RI | AREE  | G | CTDAIVLGHH | R | DDVLET | FF | MNLMNG | H | GR | L | A | M | P | P | K | L |
| tr A0A2P8FGY9 A0A2P8FGY9_9RHOB | . . . . . | A. GR | TY | CALCSRLRRGN  | LY | .RI | AREE  | G | CTAVVLGHH  | R | DDILET | FF | MNLFH  | G | GR | L | A | M | P | P | K | L |
| tr A0A1C1YZ22 A0A1C1YZ22_9RHIZ | . . . . . | E. GA | TY | CALCSRLRRGN  | LY | .RV | AREE  | G | CEALVLGHH  | R | DDILET | FF | LNLFH  | G | GR | L | A | M | P | P | K | L |
| tr A0A2W5S0Y5 A0A2W5S0Y5_RHOSH | . . . . . | T. GR | TF | CALCSRLRRGN  | LY | .RI | AREE  | G | CTAVVLGHH  | R | DDILET | FF | MNLFH  | G | GR | L | A | M | P | P | K | L |
| tr A0A1W6PTA1 A0A1W6PTA1_9RHIZ | . . . . . | E. GA | TY | CALCSRLRRGN  | LY | .RI | AREE  | G | CDALVLGHH  | R | EDILET | FF | MNFFH  | G | GR | L | A | M | P | P | K | L |
| tr A0A1M4XP05 A0A1M4XP05_9RHOB | . . . . . | A. GR | TY | CALCSRLRRGN  | LY | .RI | AREE  | G | CTAVVLGHH  | R | DDILET | FF | LNLFH  | G | GR | L | A | M | P | P | K | L |
| tr J3HU04 J3HU04_9RHIZ         | . . . . . | E. NQ | TY | CALCSRLRRGH  | LY | .RV | AREE  | G | CTAVVLGHH  | R | EDILET | FF | MNLFH  | G | GR | L | A | M | P | P | K | L |
| tr A0A1H0F7L0 A0A1H0F7L0_9RHIZ | . . . . . | E. NQ | TY | CALCSRLRRGH  | LY | .RV | AREE  | G | CTAVVLGHH  | R | EDILET | FF | MNLFH  | G | GR | L | A | M | P | P | K | L |
| tr A0A1X4P109 A0A1X4P109_9RHOB | . . . . . | Q. GR | TY | CALCSRLRRGN  | LY | .RI | AREE  | G | CDALVLGHH  | R | DDILET | FF | MNLFH  | G | GR | L | A | M | P | P | K | L |
| tr A0A2N5IMC5 A0A2N5IMC5_9RHOB | . . . . . | A. GR | TY | CAMCSRLRRGN  | LY | .RI | AREE  | G | CTAVVLGHH  | R | DDILET | FF | MNLFH  | G | GR | L | A | M | P | P | K | L |
| tr A0A0P9B4X2 A0A0P9B4X2_9RHOB | . . . . . | K. GR | TL | CAMCSRLRRGN  | LY | .RI | AREE  | G | CTAVVLGHH  | R | DDILET | FF | MNLFH  | G | GR | L | A | M | P | P | K | L |
| tr A0A1H7JEM0 A0A1H7JEM0_9RHOB | . . . . . | A. GR | TY | CALCSRLRRAN  | LY | .RI | AREE  | G | CTAVVLGHH  | R | DDILET | FF | LNLFH  | G | GK | I | A | M | P | P | K | L |
| tr A0A0S2EPF2 A0A0S2EPF2_9RHIZ | . . . . . | E. GA | TT | CALCSRLRRGN  | LY | .RI | AREE  | G | CEALVLGHH  | L | DDSIET | FF | MNLMHG | H | GK | L | A | M | P | P | K | L |
| tr A0A285XL81 A0A285XL81_ENSAD | . . . . . | E. GA | TY | CALCSRLRRGN  | LY | .RI | AKEE  | G | CDALVLGHH  | R | EDIIET | FF | LNLFH  | G | AK | L | A | M | P | P | K | L |
| tr A0A258BYX2 A0A258BYX2_9RHOB | . . . . . | E. GR | TY | CSMCSRLRRGIL | Y  | .RV | AREE  | G | CEALVLGHH  | R | DDALAT | FF | MNLIHG | H | GR | L | A | M | P | P | K | L |
| tr A0A1L9BV67 A0A1L9BV67_9RHOB | . . . . . | A. GR | TY | CAMCSRLRRGN  | LY | .RI | AREE  | G | CTAVVLGHH  | R | DDILET | FF | MNLFH  | G | GR | L | A | M | P | P | K | L |
| tr A0A0C2GQ02 A0A0C2GQ02_9RHOB | . . . . . |       |    |              |    |     |       |   |            |   |        |    |        |   |    |   |   |   |   |   |   |   |

|                                 |                                     |                   |                |              |             |           |          |         |
|---------------------------------|-------------------------------------|-------------------|----------------|--------------|-------------|-----------|----------|---------|
| tr A0A1H0JJ15 A0A1H0JJ15_9RHIZ  | . . . . . E. GATT                   | CALCSRLRRGNLY     | .RIAREEE       | GCEALVLGHHH  | DDSLETF     | FFLNMF    | FGKLSAMP | AKLI    |
| tr A0A1N6PQL7 A0A1N6PQL7_9RHIZ  | . . . . . E. GATT                   | CALCSRLRRGNLY     | .RVAREEE       | GCEALVLGHHH  | EDILETF     | FFMNF     | FHGR     | LAAMP   |
| tr A0A074JAH3 A0A074JAH3_9RHOB  | . . . . . Q. GRTY                   | CALCSRLRRGNLY     | .RIAREEE       | GCSAVVLGHHH  | DDILETF     | FFMNL     | FHGR     | LAAMP   |
| tr A0A231UWT7 A0A231UWT7_9RHIZ  | . . . . . D. NATY                   | CALCSRLRRGHLY     | .RIAREEE       | GCSALVLGHHH  | EDILETF     | FFLNLF    | FHGR     | LAAMP   |
| tr I5BTQ6 I5BTQ6_9RHIZ          | . . . . . E. SSTY                   | CALCSRLRLRPPL     | .LPHRAGG       | GCSLVLGHHH   | EDILETF     | FFMNL     | FHGR     | LAAMP   |
| tr A0A084UBG3 A0A084UBG3_9RHIZ  | . . . . . E. NRTY                   | CALCSRLRRGHLY     | .RIAREEE       | GCSLVLGHHH   | DDILETF     | FFMNL     | FHGR     | LAAMP   |
| tr A0A2S9IKS0 A0A2S9IKS0_9RHIZ  | . . . . . E. NQTY                   | CALCSRLRRGNLY     | .RVAREEE       | GCSALVLGHHH  | EDILETF     | FFMNF     | FHGR     | LAAMP   |
| tr A0A2K9ECD1 A0A2K9ECD1_9RHOB  | . . . . . T. GRTY                   | CALCSRLRRGNLY     | .RIAREEE       | GCSAVVLGHHH  | DDILETF     | FFMNL     | FHGR     | LAAMP   |
| tr A0A258ELF7 A0A258ELF7_9RHOB  | . . . . . P. GGTM                   | CALCSRLRRGNLY     | .RIAREEE       | GCESTVVLGHHH | DDILETF     | FFMNL     | FHGR     | LAAMP   |
| tr A0A2M8N1N7 A0A2M8N1N7_9RHOB  | . . . . . P. GGTM                   | CALCSRLRRGNLY     | .RIAREEE       | GCESTVVLGHHH | DDILETF     | FFMNL     | FHGR     | LAAMP   |
| tr A0A0Q6CSE7 A0A0Q6CSE7_9RHIZ  | . . . . . A. GSTY                   | CALCSRLRRGHLY     | .RIAREEE       | GCEALVLGHHH  | EDCLETFF    | FFMNL     | FHGR     | LAAMP   |
| tr A0A2D7LFX0 A0A2D7LFX0_9RHOB  | . . . . . E. GRTF                   | CALCSRLRRGHLY     | .RIAREEE       | GCSAVVLGHHH  | DDILETF     | FFMNL     | FHGR     | LAAMP   |
| tr A0A2D8YFN5 A0A2D8YFN5_9RHOB  | . . . . . E. DRTF                   | CSMCSRLRRGILY     | .RIAREEE       | GCEAIVLGHHH  | DDALETFF    | FMNL      | FVHGR    | LAAMP   |
| tr A0A0M3T332 A0A0M3T332_9RHIZ  | . . . . . H. TQTY                   | CALCSRLRQGHLY     | .RIAREEE       | HCSALVLGHHH  | DDVLETFF    | FMNL      | FHAG     | LAAMP   |
| tr A0A0M6XVB7 A0A0M6XVB7_9RHOB  | . . . . . A. GRTF                   | CALCSRLRRGNLY     | .RVAREEE       | GCSAVVLGHHH  | DDILETF     | FFLNLF    | FHGR     | LAAMP   |
| tr W6VXL4 W6VXL4_9RHIZ          | . . . . . E. GATT                   | CALCSRLRRGNLY     | .RIAREEE       | GCDALVLGHHH  | EDILETF     | FFMNF     | FHGR     | LAAMP   |
| tr K2NTH0 K2NTH0_9RHIZ          | . . . . . E. TATY                   | CALCSRLRRGHLY     | .RVAREEE       | GCSALVLGHHH  | EDILETF     | FFMNL     | FHGR     | LAAMP   |
| tr K2MG66 K2MG66_9RHIZ          | . . . . . E. ASTY                   | CALCSRLRRGHLY     | .RVAREEE       | GCAALVLGHHH  | EDILETF     | FFMNL     | FHGR     | LAAMP   |
| tr A0A0Q8IP21 A0A0Q8IP21_9RHIZ  | . . . . . A. GATT                   | CALCSRLRRGNLY     | .RIAREEE       | GCTALVLGHHH  | DDSLETF     | FFMNM     | FHGR     | LAAMP   |
| tr A0A0F5FNU3 A0A0F5FNU3_9RHIZ  | . . . . . E. GATT                   | CALCSRLRRGHLY     | .RIAREEE       | GCSALVLGHHH  | DDSLETF     | FFMNL     | FHGR     | LAAMP   |
| tr A0A0F5LYW5 A0A0F5LYW5_9RHIZ  | . . . . . A. GATT                   | CALCSRLRRGNLY     | .RIAREEE       | GCSALVLGHHH  | DDSLETF     | FFMNL     | FHGR     | LAAMP   |
| tr A0A1E4BZ93 A0A1E4BZ93_9RHIZ  | . . . . . A. GKTY                   | CALCSRLRRGHLY     | .RVAREEE       | GCHAVVLGHHH  | EDILETF     | FFLNLF    | FHGR     | LAAMP   |
| tr A0A1G3G740 A0A1G3G740_9RHOB  | . . . . . P. GGTM                   | CALCSRLRRGNLY     | .RIAREEE       | GCSAVVLGHHH  | DDILETF     | FFMNL     | FHGR     | LAAMP   |
| tr A0A1G7GDX2 A0A1G7GDX2_9RHOB  | . . . . . P. GGTM                   | CALCSRLRRGNLY     | .RIAREEE       | GCSAVVLGHHH  | DDILETF     | FFMNL     | FHGR     | LAAMP   |
| tr A0A238URK6 A0A238URK6_9RHOB  | . . . . . P. GGTM                   | CALCSRLRRGNLY     | .RVAREEE       | GCSAVVLGHHH  | DDILETF     | FFMNL     | FHGR     | LAAMP   |
| tr A0A1E4FYF9 A0A1E4FYF9_9RHIZ  | . . . . . A. GATT                   | CALCSRLRRGNLY     | .RIAREEE       | GCTALVLGHHH  | DDSLETF     | FFMNL     | FHGR     | LAAMP   |
| tr A0A0F5QJ07 A0A0F5QJ07_9RHIZ  | . . . . . A. GATT                   | CALCSRLRRGNLY     | .RIAREEE       | GCTALVLGHHH  | DDSLETF     | FFMNL     | FHGR     | LAAMP   |
| tr A0A1G3G740 A0A1G3G740_9RHOB  | . . . . . P. GGTM                   | CALCSRLRRGNLY     | .RIAREEE       | GCSAVVLGHHH  | DDILETF     | FFMNL     | FHGR     | LAAMP   |
| tr A0A2S1C1I6 A0A2S1C1I6_9RHOSH | . . . . . P. GGTM                   | CALCSRLRRGNLY     | .RIAREEE       | GCESTVVLGHHH | DDILETF     | FFMNL     | FHGR     | LAAMP   |
| tr A0A1M7SPV7 A0A1M7SPV7_9RHOB  | . . . . . A. GRTY                   | CALCSRLRRGHLY     | .RIAREEE       | GCSAVVLGHHH  | DDILETF     | FFMNL     | FHGR     | LAAMP   |
| tr M9RLX6 M9RLX6_9RHOB          | . . . . . M. GRTM                   | CALCSRLRRGNLY     | .RIAREEE       | GCSAVVLGHHH  | DDILETF     | FFMNM     | FHGR     | LAAMP   |
| tr A0A238K9T4 A0A238K9T4_9RHOB  | . . . . . A. GRTM                   | CALCSRLRRGNLY     | .RIAREEE       | GCSAVVLGHHH  | DDILETF     | FFMNM     | FHGR     | LAAMP   |
| tr A0A1Y5S1U1 A0A1Y5S1U1_9RHOB  | . . . . . E. GRTF                   | CALCSRLRRGNLY     | .RIAREEE       | GCSAVVLGHHH  | DDILETF     | FFMNM     | FHGR     | LAAMP   |
| tr A0A1I3LLP4 A0A1I3LLP4_9RHOB  | . . . . . A. GRTY                   | CALCSRLRRGNLY     | .RIAREEE       | GCSAVVLGHHH  | DDILETF     | FFLNLF    | FHGR     | LAAMP   |
| tr A0A1I3Z0S5 A0A1I3Z0S5_9RHIZ  | . . . . . E. GRTY                   | CALCSRLRRGHLY     | .RIAREEE       | GCSLVLGHHH   | EDILETF     | FFMNL     | FHGR     | LAAMP   |
| tr A0A1T4LDM3 A0A1T4LDM3_9RHIZ  | . . . . . E. GATT                   | CALCSRLRRGHLY     | .RVAREEE       | GCEALVLGHHH  | DDALETFF    | FMNL      | FHGR     | LAAMP   |
| tr C7D7D6 C7D7D6_9RHOB          | . . . . . E. GRTY                   | CALCSRLRRANLY     | .RIAREEE       | GCSAVVLGHHH  | DDILETF     | FFMNL     | FHGR     | LAAMP   |
| tr A0A0R2TQ71 A0A0R2TQ71_9RHOB  | . . . . . A. GHM                    | CALCSRLRRGNLY     | .RIAREEE       | GCSAVVLGHHH  | DDILETF     | FFMNL     | FHGR     | LAAMP   |
| tr A0A1Q3KQX4 A0A1Q3KQX4_9RHIZ  | . . . . . E. GN TY                  | CALCSRLRRGHLY     | .RIAREEE       | GCAALVLGHHH  | EDILETF     | FFMNL     | FHGR     | LAAMP   |
| tr A0A2T7FWC9 A0A2T7FWC9_9RHOB  | . . . . . A. GRM                    | CALCSRLRRGNLY     | .RIAREEE       | GCSAVVLGHHH  | DDILETF     | FFMNL     | FHGR     | LAAMP   |
| tr A0A2D7D4Q1 A0A2D7D4Q1_9RHOB  | . . . . . A. GR TY                  | CALCSRLRRGHLY     | .RIAREENC      | GSAVVLGHHH   | DDILETF     | FFMNI     | FHGR     | LAAMP   |
| tr B6B0B9 B6B0B9_9RHOB          | . . . . . A. GR TF                  | CALCSRLRRGNLY     | .RVAREEE       | GCTAVVLGHHH  | DDILETF     | FFMNL     | FHGR     | LAAMP   |
| tr A0A1H3LLW2 A0A1H3LLW2_9RHOB  | . . . . . Q. GR TF                  | CALCSRLRRGNLY     | .RIAREEE       | GCTAVVLGHHH  | DDILETF     | FFMNL     | FHGR     | LAAMP   |
| tr A0A1I0XGW3 A0A1I0XGW3_9RHOB  | . . . . . Q. GR TF                  | CALCSRLRRGHLY     | .RIAREEE       | GCSAVVLGHHH  | DDILETF     | FFMNL     | FHGR     | LAAMP   |
| tr LONFM3 LONFM3_9RHIZ          | . . . . . E. GATT                   | CALCSRLRRGNLY     | .RIAREEE       | GCDALVLGHHH  | EDILETF     | FFMNF     | FHGR     | LAAMP   |
| tr A0A0G6EW32 A0A0G6EW32_9RHIZ  | . . . . . A. GATT                   | CALCSRLRRGNLY     | .RIAREEE       | GCEALVLGHHH  | DDSLETF     | FFMNL     | FHGR     | LAAMP   |
| tr A0A2G6IVP7 A0A2G6IVP7_9RHOB  | . . . . . E. GR TF                  | CALCSRLRRGHLY     | .RIAREENC      | GSAIVLGHHH   | DDILETF     | FFMNL     | FHGR     | LAAMP   |
| tr A0A2D9RGP6 A0A2D9RGP6_9RHOB  | . . . . . E. TK TY                  | CALCSRLRRGILY     | .RIAREEE       | KCDALVLGHHH  | DDALETFF    | FMNL      | FHGR     | LAAMP   |
| tr A0A0K0TWP8 A0A0K0TWP8_9RHIZ  | . . . . . A. GATT                   | CALCSRLRRGHLY     | .RIAREEE       | GCSALVLGHHH  | EDDSLETF    | FFMNL     | FHGR     | LAAMP   |
| tr A0A2Y9AFJ0 A0A2Y9AFJ0_9RHOB  | . . . . . A. GR TY                  | CALCSRLRRANLY     | .RIAREEE       | GCSAVVLGHHH  | DDILETF     | FFLNLF    | FHGR     | LAAMP   |
| tr A0A1H8A7L7 A0A1H8A7L7_9RHOB  | . . . . . V. GR TL                  | CTMCSRLRRANLY     | .RIAREEE       | GCTAVVLGHHH  | DDILETF     | FFLNLF    | FHGR     | LAAMP   |
| tr A0A081MIH6 A0A081MIH6_9RHIZ  | . . . . . E. GATT                   | CALCSRLRRGNLY     | .RVAREEE       | GCDALVLGHHH  | EDILETF     | FFMNF     | FHGR     | LAAMP   |
| tr A0A2E2EWC2 A0A2E2EWC2_9RHOB  | . . . . . Q. GR TY                  | CALCSRLRRGNLY     | .RIAREEE       | GCSAVVLGHHH  | DDILETF     | FFLNLF    | FHGR     | LAAMP   |
| tr A3VF87 A3VF87_9RHOB          | . . . . . E. GR TF                  | CALCSRLRRGNLY     | .RIAREEE       | GCSAVVLGHHH  | DDILETF     | FFMNL     | FHGR     | LAAMP   |
| tr A0A1M5ABX1 A0A1M5ABX1_9RHIZ  | . . . . . A. GR TY                  | CALCSRLRRGHLY     | .RVAREEE       | GCSALVLGHHH  | EDILETF     | FFLNLF    | FHGR     | LAAMP   |
| tr A0A059X5C8 A0A059X5C8_9BACT  | . . . . . E. GSTY                   | CALCSRLRRGHLY     | .RIAREEE       | GCSALVLGHHH  | EDILETF     | FFMNL     | FHGR     | LAAMP   |
| tr A0A1M6C338 A0A1M6C338_9RHIZ  | . . . . . A. GG TY                  | CALCSRLRRGNLY     | .RIAREEE       | GCEALVLGHHH  | DDSLETF     | FFMNL     | FHGR     | LAAMP   |
| tr A0A1K2HSP5 A0A1K2HSP5_9RHIZ  | . . . . . A. GATT                   | CALCSRLRRGNLY     | .RIAREEE       | GCSALVLGHHH  | EDDSLETF    | FFMNL     | FHGR     | LAAMP   |
| tr A0A2G1QM78 A0A2G1QM78_9RHIZ  | . . . . . Q. GATT                   | CALCSRLRRGHLY     | .RIAREEE       | GCSALVLGHHH  | EDILETF     | FFMNL     | FHGR     | LAAMP   |
| tr A0A1L3SU86 A0A1L3SU86_9RHIZ  | . . . . . Q. GSTY                   | CALCSRLRRGHLY     | .RIAREEE       | GCSALVLGHHH  | DDILETF     | FFMNL     | FHGR     | LAAMP   |
| tr A0A2E0ITN2 A0A2E0ITN2_9RHOB  | . . . . . E. NRTY                   | CALCSRLRRGHLY     | .RIAREEE       | GCSALVLGHHH  | EDILETF     | FFMNL     | FHGR     | LAAMP   |
| tr A0A1M3KM7 A0A1M3KM7_9RHIZ    | . . . . . E. GATT                   | CALCSRLRRGHLY     | .RIAREEE       | GCSALVLGHHH  | EDDSLETF    | FFMNL     | FHGR     | LAAMP   |
| sp Q11IV8 TTCA_CHESB            | . . . . . E. NRTY                   | CALCSRLRRGHLY     | .RIAREEE       | GCSLVLGHHH   | EDILETF     | FFMNF     | FHGR     | LAAMP   |
| tr A0A1M2Z5F2 A0A1M2Z5F2_9RHIZ  | . . . . . E. GATT                   | CALCSRLRRGHLY     | .RIAREEE       | GCSALVLGHHH  | EDILETF     | FFMNL     | FHGR     | LAAMP   |
| tr A0A2S8EVT0 A0A2S8EVT0_9RHOB  | . . . . . E. GR TY                  | CALCSRLRRGILY     | .RVAREEE       | GCTAVVLGHHH  | DDILETF     | FFMNL     | FHGR     | LAAMP   |
| tr A0A1U9JUZ5 A0A1U9JUZ5_9RHIZ  | . . . . . E. AQ TY                  | CALCSRLRRGILY     | .RIAREEE       | GCSALVLGHHH  | DDALETFF    | FMNL      | FHGR     | LAAMP   |
| tr E6YQZ3 E6YQZ3_9RHIZ          | . . . . . Q. TQ TY                  | CALCSRLRRGHLY     | .RIAREEE       | GCSALVLGHHH  | DDVLETFF    | FMNL      | FHGR     | LAAMP   |
| tr A0A2D9WU28 A0A2D9WU28_9GAMM  | . . . . . E. KQ TT                  | CPVCSRLRRGILY     | .THAKKI        | GASKIALGHHH  | DDVLETFF    | LMNL      | FMYG     | AKLKAMP |
| tr A0A254R6N5 A0A254R6N5_9RHOB  | . . . . . A. GR TY                  | CALCSRLRRGNLY     | .RIAREEE       | GCSAVVLGHHH  | DDILETF     | FFMNL     | FHGR     | LAAMP   |
| tr A0A2E1LQ03 A0A2E1LQ03_9RHOB  | . . . . . A. DR TF                  | CALCSRLRRGILY     | .RVAREEE       | GCSALVLGHHH  | DDALETFF    | FMNL      | NLNG     | GR      |
| tr A0A1I7CMN1 A0A1I7CMN1_9RHOB  | . . . . . A. GR TF                  | CALCSRLRRGNLY     | .RIAREEE       | GCSAVVLGHHH  | DDILETF     | FFMNL     | FHGR     | LAAMP   |
| tr K1JJ4D K1JJ4D_9BURK          | . . . . . E. GR NV                  | CSLCARLRGILY      | .RVAGEMK       | CNKIALGHHH   | DDIVGTLL    | LNLF      | FYGR     | KMAMP   |
| tr S3CA62 S3CA62_9BURK          | . . . . . E. GK NV                  | CSLCARLRGILY      | .RVARET        | CNRIALGHHH   | DDIVGTLL    | LNLF      | FYGR     | KMAMP   |
| tr R7C157 R7C157_9BURK          | . . . . . S. GK NV                  | CSLCARLRGILY      | .RVAREL        | CTKIALGHHH   | DDIVGTLL    | LNLF      | FYGR     | KMAMP   |
| tr H3KHG5 H3KHG5_9BURK          | . . . . . E. GK NV                  | CSLCARLRGILY      | .RVASEM        | CNKIALGHHH   | DDIVGTLL    | LNLF      | FYGR     | KMAMP   |
| tr A0A2H5W0L3 A0A2H5W0L3_9BACT  | . . . . . P. GT TA                  | CALCSRLRRGILY     | .RLAKELRA      | CTKIALGHHH   | DDIMVLTLL   | LVSV      | FYGR     | ITMPP   |
| tr A0A0G4EZY9 A0A0G4EZY9_9ALVE  | . . . . . E. GK TY                  | CALCSRLRRGILY     | .TAEEI         | GANKIALGHHH  | DDALETFF    | LMNI      | HQGG     | ITMPP   |
| tr A0A1G1MFT4 A0A1G1MFT4_9BACT  | . . . . . KETKPSDIN                 | CFWCSWNRRKALF     | .ETAYRY        | GCTKVALGHHH  | DDIVETVLL   | LNMF      | FQGG     | ITMPP   |
| tr D6YZP9 D6YZP9_DESAT          | . . . . . LA. . . . . A. E. EG. KNG | CYHCSSRRNRRLF     | .ALAREHN       | CNKIALGHHH   | EDDIETFF    | LNLF      | YGGN     | ITMPP   |
| tr Q1NPM6 Q1NPM6_9DELT          | . . . . . MA. . . . . A. E. EG. KNG | CYHCSSRRNRRLF     | .ELAREHN       | CNKIALGHHH   | EDDIETFF    | LNLF      | YGGN     | ITMPP   |
| tr A0A1G1KMU0 A0A1G1KMU0_9BACT  | . . . . . ISHKPSFAL                 | KKTQPAELS         | .CFWCSWNRRKALF | .TLAEKF      | GCRKVAFGHHH | QDDINETLL | LNMF     | YGGN    |
| tr A0A1V4Y2S8 A0A1V4Y2S8_9DELT  | . . . . . LS. . . . . H. SAYNKK     | NP. CFWCSRLRRKRLF | .EIAAQEK       | CNRIALAHHQ   | DDDIETLL    | LNMF      | YGGN     | ITMPP   |
| tr A0A2HOM0T2 A0A2HOM0T2_9BACT  | . . . . . K. GKSRKDIS               | CFWCSWNRRKALF     | .EVTNRFK       | CTKIALGHHH   | QDDDIETLL   | LNMF      | YGGN     | ITMPP   |
| tr A0A2G6NFX5 A0A2G6NFX5_9DELT  | . . . . . LA. . . . . H. RPNQ. ASA  | CFCLCARLRKALF     | .EHCRTDA       | CNKIALGHHH   | QDDDIETLL   | LNLF      | YAGH     | ITMPP   |
| tr A0A1V4XPE0 A0A1V4XPE0_9DELT  | . . . . . LS. . . . . H. SDYNKK     | NP. CFWCSRLRRKRLF | .EIAAGDK       | CNKIAFAHHH   | QDDMIETLL   | LNMF      | YGGN     | ITMPP   |
| tr A0A0F0CSK6 A0A0F0CSK6_9BACT  | . . . . . N. . . . . N. KNTN        | CFWCSWNRRKALF     | .TLADEI        | GYNKIAFGHHH  | QDDIVETIL   | LNLF      | YGGN     | ITMPP   |
| tr A0A2H0LZG9 A0A2H0LZG9_9BACT  | . . . . . K. KGQSRADIT              | CFWCSWNRRKRLF     | .KAATESI       | CNKVALGHHH   | QDDIVETVLL  | LNLF      | YGGN     | ITMPP   |
| tr A0A1H7YYF0 A0A1H7YYF0_9DELT  | . . . . . LS. . . . . H. SDYNKK     | NP. CFWCSRLRRKRLF | .EIAAGEK       | CNRIALAHHQ   | QDDDIETLL   | LNMF      | YGGN     | ITMPP   |
| tr A0A1V5SHM5 A0A1V5SHM5_9BACT  | . . . . . LA. . . . . H. SDFNKK     | NP. CFWCSRLRRKRLF | .EIAAGEND      | CNKVALGHHH   | QDDMIETLL   | LNLF      | YGGN     | ITMPP   |
| tr A0A1G1Q3T7 A0A1G1Q3T7_9BACT  | . . . . . L. DENKQT                 | CFWCSWNRRKALF     | .EIADELNC      | CNKIALGHHH   | QDDIVETVLL  | LNLF      | YGGN     | ITMPP   |
| tr A0A2N5YRU6 A0A2N5YRU6_9BACT  | . . . . . K. QSKPPQ                 | CFWCSWNRRKRLF     | .ELSEELNC      | CNKIALGHHH   | QDDDIETLL   | LNMF      | YGGN     | ITMPP   |
| tr A0A1V5BS52 A0A1V5BS52_9DELT  | . . . . . K. GDSEFPF                | CFWCSWNRRKALF     | .DLAHELKC      | CNKIAFAHHH   | QDDDIETML   | LNLF      | YGGN     | ITMPP   |
| tr A0A1V4Y2C6 A0A1V4Y2C6_9DELT  | . . . . . LS. . . . . H. SDYNKK     | NP. CFWCSRLRRKRLF | .EIAAGEI       | CNKIALAHHQ   | QDDMIETLL   | LNMF      | YGGN     | ITMPP   |
| tr A0A2M7F5M5 A0A2M7F5M5_9BACT  | . . . . . EI. . . . . C. GAQNLPE    | SC. CFHCSRIIRKRLF | .ETAREL        | GCRKVAFGHHH  | QDDMIETLL   | LNMF      | YGGN     | ITMPP   |
| tr A0A2G6GY47 A0A2G6GY47_9BACT  | . . . . . G. GQRKAKEAKVSGPQKKA      | CFICSWHRKALF      | .TLGKTLR       | CNKIALGHHH   | QDDDAVETLL  | LNMF      | YGGN     | ITMPP   |
| tr A0A2L1GPK6 A0A2L1GPK6_9DELT  | . . . . . AN. . . . . G. SREHA. AGT | CFACARNRRKSLF     | .RAARHL        | CNKVALGHHH   | QDDIVETVLL  | LNLF      | YAGH     | ITMPP   |
| tr A8ZUJ5 A8ZUJ5_DESOH          | . . . . . VA. . . . . H. SDANR. ENP | CFCLCARLRKRLF     | .EVSALD        | CNKIALGHHH   | QDDDIETLL   | LNMF      | YGGN     | ITMPP   |
| tr A0A1E7JE91 A0A1E7JE91_9DELT  | . . . . . QA. . . . . H. SKENR. ENP | CFCLCARLRKRLF     | .ELAHEL        | CNKIALGHHH   | QDDDIETLL   | LNMF      | YGGN     | ITMPP   |
| tr A0A1V5KTE6 A0A1V5KTE6_9BACT  | . . . . . YA. . . . . H. SRHNS. NP  | CYFLCSRIIRKRLF    | .ETAERL        | CNKIALGHHH   | QDDDIETLL   | LNMF      | YGGN     | ITMPP   |
| tr A0A1G3NZH6 A0A1G3NZH6_9SPIR  | . . . . . R. L. KPGKTMN             | CFYCSNQRLLELM     | .KLAEBERK      | CNKIALGHHH   | QDDIAETLL   | LNMF      | YGGN     | ITMPP   |
| tr A0A1V5CAM1 A0A1V5CAM1_9DELT  | . . . . . K. PK. EDF                | CFWCSWSRRKLVF     | .SLMGKME       | CNKIALGHHH   | QDDDIETML   | LNLF      | YGGN     | ITMPP   |
| tr A0A117LC33 A0A117LC33_9BACT  | . . . . . LE. . . . . V. AEKKI. TSP | CFWCSWSRRKLVF     | .KLAETWKA      | CNKIAFGHHH   | QDDDLTFF    | LNLF      | YGGN     | ITMPP   |
| tr A0A1G1LQR4 A0A1G1LQR4_9BACT  | . . . . . K. GKEKWED                | ID. CFWWSKNRRKALF | .LFCGR         | LFNKIAFGHHH  | QDDDIETIL   | LNQFY     | RG       | ITMPP   |



|                                |                    |      |                |               |         |            |             |          |        |        |        |     |     |    |    |   |
|--------------------------------|--------------------|------|----------------|---------------|---------|------------|-------------|----------|--------|--------|--------|-----|-----|----|----|---|
| tr A0A1V5I5K2 A0A1V5I5K2_9SPIR | .....F..SNPD       | SR   | CFYCSWHRRKALF  | GLMREG        | GF      | SRLAFGHH   | DDIET       | LI       | LNMTF  | NAR    | LT     | MP  | LR  | L  |    |   |
| tr A0A1Y1CNQ1 A0A1Y1CNQ1_9BACT | .....R..PSKK       | PA   | CFRCSWHRRTT    | LF            | KMTDEF  | KCNKIALGHH | DDAIE       | TLL      | MNMY   | QGA    | ICS    | MP  | AK  | L  |    |   |
| tr A0A1Y1S2G7 A0A1Y1S2G7_9SPTO | .....R..L.KPGRS    | LN   | CYWCSTQRRME    | LL            | RYAEAH  | DGVALGH    | DDVLE       | TLL      | MNMY   | QGA    | ICS    | MP  | PM  | V  |    |   |
| tr A0A2N2Z2D1 A0A2N2Z2D1_9BACT | .....I..DERKPA     | CF   | ICSWKRRKALF    | AIARER        | G       | CNKIAFGHH  | DDAIE       | TLL      | MNMY   | QGA    | ICS    | MP  | PK  | L  |    |   |
| tr A0A1V6ALY3 A0A1V6ALY3_9DELT | ..LA.....H..SDFNRK | NP   | CFCLCSRLRRK    | IF            | EIADEN  | G          | CNKIAFAHH   | DDIET    | TLL    | INMFY  | GRE    | IST | MP  | PK |    |   |
| tr A0A0W8FQ52 A0A0W8FQ52_9ZZZZ | ..LA.....H..SDANKK | NP   | CFCLCSRLRRK    | IF            | EIADAE  | G          | CNKIAFAHH   | DDIET    | TLL    | INMFY  | GRE    | IST | MP  | NQ |    |   |
| tr E4T2Z7 E4T2Z7_PALPW         | .....DTHKST        | CF   | CLCSWHRRKALF   | DVARNL        | G       | CNKIALGHH  | DDIET       | TLL      | LNLFY  | QGS    | FT     | MP  | PK  | L  |    |   |
| tr A0A1G1KV78 A0A1G1KV78_9BACT | .....SEERWEE       | ID   | CFRWSRHRRTA    | LF            | DLADRQ  | G          | CNKIAFGHH   | DDIAE    | TIL    | LNQFY  | RG     | E   | IAS | MR |    |   |
| tr A0A2N2HPG2 A0A2N2HPG2_9DELT | ..VA.....H..SDVNRK | NP   | CFCLCSRLRRK    | IF            | EIAEER  | G          | CNKIAFAHH   | DDIET    | TLL    | LNLFY  | GRE    | IST | MP  | PM |    |   |
| tr A0A2G6MFG2 A0A2G6MFG2_9DELT | ..T.....I..TGSEA   | VOI  | CFRCSRSRRKQ    | LF            | DHAGEQ  | G          | CNKIALGHH   | DDIET    | FF     | LNLTCA | GN     | IST | MP  | PS |    |   |
| tr A0A0Q1C8R9 A0A0Q1C8R9_9DELT | ..LA.....H..SDINNK | NP   | CFCLCSRLRRK    | IF            | EIADAE  | G          | CNKIAFAHH   | DDIET    | TLL    | INMFY  | GRE    | IST | MP  | NQ |    |   |
| tr A0A1V6ISQ0 A0A1V6ISQ0_9DELT | ..VA.....H..SDVNRK | NP   | CFCLCSRLRRK    | IF            | EIADAE  | G          | CNKIAFAHH   | DDIET    | TLL    | INMFY  | GRE    | IST | MP  | NQ |    |   |
| tr A0A091FEB2 A0A091FEB2_9DELT | ..LA.....H..SNINKK | NP   | CFCLCSRLRRK    | IF            | EIADAE  | G          | CNKIAFAHH   | DDIET    | TLL    | INMFY  | GRE    | IST | MP  | NQ |    |   |
| tr A0A2N7PKR2 A0A2N7PKR2_9BACT | ..FE.....A..VEKNT  | ASP  | CFVCSWYRRKY    | FF            | KLAKLN  | IKKIAFGHH  | DDVIV       | FF       | IKMFY  | CGE    | LS     | TIL | PK  | Q  |    |   |
| tr A0A2N2G9N5 A0A2N2G9N5_9DELT | ..LS.....H..SDFNRK | NP   | CFCLCSRLRRK    | IF            | EIAEER  | G          | CNKIAFAHH   | DDIET    | TLL    | INMFY  | GRE    | IST | MP  | NQ |    |   |
| tr A0A2N2LSI7 A0A2N2LSI7_9DELT | ..LS.....H..SDFNRK | NP   | CFCLCSRLRRK    | IF            | EIAEER  | G          | CNKIAFAHH   | DDIET    | TLL    | INMFY  | GRE    | IST | MP  | NQ |    |   |
| tr A0A1W9PYD7 A0A1W9PYD7_9DELT | ..VA.....H..SEENR  | ENP  | CFCLCSRLRRK    | IF            | EVCAEL  | G          | CNKIALGHH   | DDIET    | MF     | ISMFY  | GGE    | SL  | MP  | PF |    |   |
| tr A0A0U5AFN2 A0A0U5AFN2_9BACT | ..ME.....A..FDKGT  | ASP  | CFVCSWNRRKY    | FF            | NLADKL  | IKKIAFGHH  | DDVIT       | FF       | MNMFY  | CGE    | LS     | TIL | PK  | Q  |    |   |
| tr A0A0N0D6Q9 A0A0N0D6Q9_9DELT | ..IA.....H..GPNR   | ENP  | CFCLCARLRRK    | IF            | EIAEQH  | G          | CNKVALGHNK  | DDIET    | LF     | INMLY  | AGE    | ISS | MP  | PL |    |   |
| tr A0A1F9B7K1 A0A1F9B7K1_9DELT | ..LA.....H..SDVNRK | NP   | CFCLCSRLRRK    | IF            | EIAASE  | G          | CNKIAFAHH   | DDIET    | TLL    | INMFY  | GRE    | IST | MP  | NQ |    |   |
| tr A0A1V5K7L8 A0A1V5K7L8_9BACT | ..LA.....H..SDFNRK | NP   | CFCLCSRLRRK    | IF            | EIAAES  | G          | CNKIAFAHH   | DDIET    | TLL    | INMFY  | GRE    | IST | MP  | NQ |    |   |
| tr E8RFH6 E8RFH6_DESPD         | ..GE.....G..EDARG  | QDL  | CFQCARSRR      | QMF           | EHARQT  | G          | CTKIAFGHH   | DDIVET   | FF     | LNLTCA | GN     | IST | MP  | PR |    |   |
| tr A0A1V7E5Z2 A0A1V7E5Z2_9BACT | ..LE.....A..KE.KK  | VSP  | CFVCSWFRKKH    | LF            | KLAGEV  | G          | CNKIAFGHH   | DDIET    | FF     | LNLMCY | HGE    | LA  | TML | PK |    |   |
| tr A0A1W9PEQ4 A0A1W9PEQ4_9BACT | ..LA.....H..SDFNRK | NP   | CFCLCTRYRQ     | CIY           | QLAEQH  | G          | CNKIAYGHH   | DDIET    | TLL    | INFFG  | GRE    | IST | MP  | PK |    |   |
| tr A0A1G1CL22 A0A1G1CL22_9BACT | ..LA.....H..SAFNR  | ENP  | CFCLCARLRRK    | IF            | ETAQEF  | G          | CNKVALGHHK  | DDIET    | FF     | LNMFY  | TGE    | IST | MP  | YQ |    |   |
| tr A0A1M7AKX7 A0A1M7AKX7_9DELT | ..RA.....H..SDENR  | ENP  | CFCLCSRLRRK    | IF            | ELAQEM  | G          | CTKIALGHHK  | DDIET    | FF     | LNLMCY | TGE    | IST | MP  | YQ |    |   |
| tr A0A1E7H3V6 A0A1E7H3V6_9DELT | ..RA.....H..SPDNR  | ENP  | CFCLCAYLRKK    | IF            | ELAEWR  | G          | CNKIALGHHK  | DDIET    | FF     | LNLMCY | TGE    | IST | MP  | YQ |    |   |
| tr A0A1V4XEJ8 A0A1V4XEJ8_9DELT | ..IS.....H..SSYNRK | NP   | CFCLCSRLRRK    | IF            | EIAAER  | G          | CNKIAFAHH   | DDIVET   | FF     | LNLMCY | TGE    | IST | MP  | YQ |    |   |
| tr A0A1F9LPM9 A0A1F9LPM9_9DELT | ..FA.....A..E..DG  | RSI  | CFHCTRQRRK     | IF            | EIAEQH  | G          | CNKIAFAHH   | DDIET    | FF     | LNLMCY | TGE    | IST | MP  | YQ |    |   |
| tr A0A1V5DP79 A0A1V5DP79_9DELT | ..LA.....H..SDFNRK | NP   | CFCLCSRLRRK    | IF            | EIAAAR  | G          | CNKIAFAHH   | DDIET    | TLL    | INMFY  | GRE    | IST | MP  | NQ |    |   |
| tr A0A2N2KLB2 A0A2N2KLB2_9DELT | ..VA.....H..SAVNRK | NP   | CFCLCSRMRRK    | IF            | EIAAEK  | G          | CNKIAFAHHK  | DDIET    | TLL    | INMFY  | GRE    | IST | MP  | NQ |    |   |
| tr K0NEP7 K0NEP7_DESTT         | ..LA.....H..SDENR  | SNP  | CFCLCSWLRRK    | IF            | EIAEQE  | G          | CCKKIALGHNK | DDIET    | FF     | INICY  | AGK    | IG  | TM  | PK |    |   |
| tr R5PGT4 R5PGT4_9BACT         | .....E..DSGKA      | PA   | CFVCSWNRRKALF  | EIAREH        | G       | CCKKIALGHH | DDAVES      | LL       | MSMFF  | NGT    | IAS    | MP  | PK  | L  |    |   |
| tr A0A2G6FDN7 A0A2G6FDN7_9DELT | ..ED.....A..RKKT   | NKQ  | CFQCARSRR      | QMF           | QYASEN  | G          | CNKIALGHHK  | DDIET    | FF     | LNLMCY | AGN    | VT  | MP  | PK |    |   |
| tr A0A2G6SNS8 A0A2G6SNS8_9DELT | ..YA.....H..GSENLK | SP   | CFICSWNRKK     | LF            | DLAKEF  | G          | CNKIALGHTK  | DDIAT    | FF     | LNLMCY | HGE    | LA  | TML | PK |    |   |
| tr F8C1Q1 F8C1Q1_THEGP         | ..IE.....A..FEKD   | SAP  | CFVCSWHRKK     | IF            | KLAEQ   | G          | CNKIAFGHH   | DDAI     | ITFF   | INMFY  | HGE    | LA  | TML | PK |    |   |
| tr A0A2N2J4R6 A0A2N2J4R6_9DELT | ..LA.....H..SDFNRK | NP   | CFCLCSRLRRK    | IF            | EIAETE  | G          | CNKIAFAHH   | DDIET    | TLL    | LNMFY  | GRE    | IST | MP  | NQ |    |   |
| tr A0A175JL87 A0A175JL87_ENTHI | .....DIEDADKNT     | TF   | CLNCGKNRRRA    | LL            | EYAKEH  | G          | YTSIALGHHM  | DDVAE    | TLL    | MNQMF  | C      | GI  | AG  | IP |    |   |
| tr A0A2N7QBT7 A0A2N7QBT7_9BACT | ..ME.....V..YEKDI  | TAP  | CFVCSWHRKK     | IF            | RLCOEK  | G          | CNKIALGHH   | DDAI     | ITFF   | INMFY  | HGE    | LA  | TML | PK |    |   |
| tr A0A1V6CH87 A0A1V6CH87_9DELT | .....KGEDES        | FT   | CFVCSWNRRKALF  | DLAHLN        | G       | CTKIAFAHH  | DDIET       | FF       | LNLMCY | TGE    | IST    | MP  | YQ  | L  |    |   |
| tr A0A1F3PRW0 A0A1F3PRW0_9BACT | .....R..ADEKH      | G    | CFICAWHRRK     | LF            | DLSREIN | C          | CNKIALGHH   | DDAVQ    | QOL    | MNMLY  | HGE    | LA  | TML | PK |    |   |
| tr A0A1F9NE61 A0A1F9NE61_9DELT | ..LA.....H..SRENT  | ENP  | CFCLCSRLRRN    | LF            | EMAKEE  | G          | CCKIALGHNK  | DDIET    | FF     | LNMFY  | SGK    | MA  | TM  | PK |    |   |
| tr A0A0S8HC42 A0A0S8HC42_9BACT | .....L..KPEKT      | P    | CFICSWNRKK     | IF            | EKSKEL  | R          | CNKVALGHHK  | DDAI     | IT     | MNMLY  | HGE    | LA  | TML | PK |    |   |
| tr A0A1T5DAY4 A0A1T5DAY4_9BACT | .....D.KRK         | SP   | CFCLCSWTRRKALF | DLAKYK        | G       | CNKIALGHHK | DDIET       | FF       | LNLMCY | TGE    | IST    | MP  | YQ  | L  |    |   |
| tr A0A2N6C0V8 A0A2N6C0V8_9DELT | ..LA.....H.....TS  | ST   | CFHCCARNRRALF  | NLARDM        | G       | CNKIALGHHK | DDIET       | FF       | LNLMCY | TGE    | IST    | MP  | YQ  | L  |    |   |
| tr A0A1V5PLF0 A0A1V5PLF0_9BACT | .....K.RP          | SPY  | CSFCSRLRRGILY  | DMARKFK       | G       | CNKIALGHHK | DDIET       | FF       | LNLMCY | TGE    | IST    | MP  | YQ  | L  |    |   |
| tr A0A2G6GMA7 A0A2G6GMA7_9DELT | ..LA.....H..DTONT  | GNP  | CFCLCSRLRRK    | IF            | ELAKAY  | G          | CCKVALGHHK  | DDIET    | FF     | LNLMCY | TGE    | IST | MP  | YQ | L  |   |
| tr A0A1F3EKI2 A0A1F3EKI2_9BACT | .....D..QKNNP      | ENP  | CFVCSWNRRKALF  | ETAQES        | G       | CNKIALGHHK | DDIET       | FF       | LNLMCY | TGE    | IST    | MP  | YQ  | L  |    |   |
| tr A0A0S8K9N6 A0A0S8K9N6_9BACT | ..RA.....H..SQENQ  | KNP  | CFCLCARLRRK    | IF            | ELAEET  | G          | CNKIALGHHK  | DDIET    | FF     | LNLMCY | TGE    | IST | MP  | YQ | L  |   |
| tr A0A2J6HPZ6 A0A2J6HPZ6_9BACT | .....N..RGKK       | TP   | CFVCSWHRKKALF  | SFAVEH        | G       | CNKIALGHHK | DDAVET      | LM       | INMVF  | HGN    | ISS    | LP  | GK  | L  |    |   |
| tr C7XC62 C7XC62_9BACT         | .....DTRKS         | P    | CFCLCSWTRRKALF | EIAKAH        | G       | CNKIALGHHK | DDIET       | FF       | LNLMCY | TGE    | IST    | MP  | YQ  | L  |    |   |
| tr A0A1F8ZXS7 A0A1F8ZXS7_9DELT | ..RA.....H..GPGNK  | ENP  | CFCLCSWLRRK    | IF            | ELSKTL  | Q          | CTKIAFGHHK  | DDIET    | FF     | LNLMCY | TGE    | IST | MP  | YQ | L  |   |
| tr A0A2J6I6B5 A0A2J6I6B5_9BACT | .....S..RGKK       | SA   | CFICSWNRKK     | LF            | QYADNN  | F          | CNKIAFGHH   | DDAVET   | LI     | INMVF  | HGN    | ISS | LP  | GK | L  |   |
| tr A0A0F8WA15 A0A0F8WA15_9ZZZZ | .....V..DSKKA      | P    | CFICSWYRRK     | LF            | EMTKLN  | C          | CNKIALGHHK  | DDAI     | IT     | MNMLY  | HGE    | LA  | TML | PK | L  |   |
| tr A0A179D358 A0A179D358_9BACT | ..ME.....A..ADAGT  | ASP  | CFVCSWHRKK     | IF            | RLAGEE  | N          | CNKIAFGHH   | DDIVV    | FF     | LNLMCY | TGE    | IST | MP  | YQ | L  |   |
| tr I5B503 I5B503_9DELT         | ..VA.....H..SDKNK  | ENP  | CFCLUSRLRRK    | IF            | ELAREH  | D          | CCKKIALGHNK | DDIET    | FF     | INICY  | AGK    | IG  | TM  | PK | L  |   |
| tr A0A0S7YQR2 A0A0S7YQR2_9DELT | ..RA.....H..GPNR   | ENP  | CFCLCSWNRRK    | IF            | EIAEQL  | G          | CNKVAFGHHK  | DDIET    | FF     | LNLMCY | TGE    | IST | MP  | YQ | L  |   |
| tr A0A2N1RRG9 A0A2N1RRG9_9SPTR | .....R..DKNK       | SI   | CFICCSWLRRK    | IF            | DFVRKE  | G          | CNKIAFGHH   | DDAIET   | FF     | LNLMCY | TGE    | IST | MP  | YQ | L  |   |
| tr A0A1V5PXE4 A0A1V5PXE4_9CHLR | .....E.....SLPL    | D    | CFRCTQLRRKALF  | RAAVRH        | G       | CNKVAFGHH  | DDAI        | IT       | LNLMCY | TGE    | IST    | MP  | YQ  | L  | L  |   |
| tr A0A1W1HKF9 A0A1W1HKF9_9DELT | ..LA.....H..SDSNR  | ENP  | CFCLCSRLRRK    | IF            | EIASDE  | G          | CNKIALGHHK  | DDIET    | FF     | LNLMCY | TGE    | IST | MP  | YQ | L  |   |
| tr A0A1G3QGU5 A0A1G3QGU5_9SPTR | .....R..DPKK       | TV   | CFVCSAWHRRK    | LF            | NCTKEL  | C          | CNKIALGHHK  | DDIET    | FF     | LNLMCY | TGE    | IST | MP  | YQ | L  |   |
| tr A0A1Y3VSZ0 A0A1Y3VSZ0_9BACT | .....V..NPKK       | PA   | CFVCSWHRKKALF  | DIAKEY        | D       | CCKKIALGHH | DDAVES      | LL       | MSMFF  | NGT    | IAS    | MP  | PK  | L  |    |   |
| tr A0A0S8HXB5 A0A0S8HXB5_9DELT | ..LS.....H..SDYNRA | SP   | CFCLCSRLRRK    | IF            | ELAREY  | R          | CNKVALAHTK  | DDVIE    | TLL    | LNLMCY | TGE    | IST | MP  | YQ | L  |   |
| tr A0A2J0MGG8 A0A2J0MGG8_9BACT | .....K.GKSRAE      | IT   | CFVCSWNRRRALF  | EIAKEY        | G       | CNKIAFGHHK | DDIVAT      | FF       | LNLMCY | TGE    | IST    | MP  | YQ  | L  | L  |   |
| tr A0A2N5YKJ4 A0A2N5YKJ4_9BACT | .....N.....RSK     | SPY  | CFYCSWVRK      | EF            | LMADEN  | C          | CNKIAFGHH   | DDVNET   | LI     | MNMLY  | HGE    | LA  | TML | PK | L  |   |
| tr A0A0C3MX87 A0A0C3MX87_9PORP | .....Q..NPKK       | PA   | CFVCSWHRKK     | LF            | DIAKEO  | H          | CCKKIALGHH  | DDAVES   | LL     | MSMFF  | NGT    | IAS | MP  | PK | L  |   |
| tr A0A1Q6ILQ5 A0A1Q6ILQ5_9BACT | .....E..DSGK       | PV   | CFVCSWNRRK     | IF            | GIAKEY  | G          | CNKIALGHHK  | DDAIET   | FF     | LNLMCY | TGE    | IST | MP  | YQ | L  |   |
| tr A0A235BV29 A0A235BV29_9BACT | .....K..LK         | ATK  | TD             | CFCCARERRKALF | ETASEF  | G          | CCKKIALGHH  | DDVNET   | FF     | LNLMCY | TGE    | IST | MP  | YQ | L  |   |
| tr C0QKM8 C0QKM8_DESAH         | ..VA.....H..SDENQ  | ENP  | CFCLCSRLRRK    | IF            | EIARDQ  | G          | CNTIALGHNK  | DDIET    | FF     | LNLMCY | TGE    | IST | MP  | YQ | L  |   |
| tr A0A1G3KZR6 A0A1G3KZR6_9SPTR | .....E..S.KKDKP    | VS   | CFVCSWLRRY     | LF            | KIADQM  | G          | IKKIALGHHK  | DDIET    | FF     | LNLMCY | TGE    | IST | MP  | YQ | L  |   |
| tr A0A0S8CMA5 A0A0S8CMA5_9DELT | ..AA.....A..E..G   | KSV  | CYHCARLRRN     | LF            | EIAEEO  | G          | SKMAFGHHK   | DDIET    | FF     | LNLMCY | TGE    | IST | MP  | YQ | L  |   |
| tr A0A1F9KX79 A0A1F9KX79_9DELT | ..LA.....H..SPENT  | ENP  | CFCLCSRLRRN    | LF            | EMAKEO  | G          | CCKKIALGHNK | DDIET    | FF     | LNLMCY | TGE    | IST | MP  | YQ | L  |   |
| tr A0A1V1WTT4 A0A1V1WTT4_9DELT | ..QG.....H..SAENR  | ENP  | CFCLCARLRRK    | IF            | EIADEL  | G          | CNKIALGHHK  | DDIET    | FF     | LNLMCY | TGE    | IST | MP  | YQ | L  |   |
| tr A0A1V5D1F3 A0A1V5D1F3_9DELT | .....NGIEEN        | SG   | CFVCSWNRRKGLF  | NLARDI        | G       | CCKKIALGHH | DDIET       | FF       | LNLMCY | TGE    | IST    | MP  | YQ  | L  | L  |   |
| tr R5UPE7 R5UPE7_9BACT         | .....E..NSGKA      | PA   | CFVCSWNRRKALF  | EIAKEW        | G       | CTKIALGHHK | DDAVES      | LL       | MSMFF  | NGT    | IAS    | MP  | PK  | L  |    |   |
| tr A0A1W9N5C1 A0A1W9N5C1_9DELT | ..VG.....H..SAENR  | ENP  | CFCLCSRLRRK    | IF            | EIADEL  | G          | CCKKIALGHHK | DDIET    | FF     | LNLMCY | TGE    | IST | MP  | YQ | L  |   |
| tr A0A1V4WN49 A0A1V4WN49_9DELT | .....TGDIEN        | LD   | CFVCSWNRRKAVF  | DLAGDL        | G       | CNKIAFAHH  | DDIET       | FF       | LNLMCY | TGE    | IST    | MP  | YQ  | L  | L  |   |
| tr A0A1G5FPP5 A0A1G5FPP5_9DELT | ..EA.....H..KDTQS  | ANP  | CFICSLRRK      | LF            | ELTSEL  | G          | CRTIALGHNK  | DDIET    | FF     | LNLMCY | TGE    | IST | MP  | YQ | L  |   |
| tr A0A0S8CTV5 A0A0S8CTV5_9DELT | ..AA.....A..E..EG  | KSV  | CYHCARLRRN     | LF            | ALAEQ   | G          | CNKIAFGHHK  | DDIET    | FF     | LNLMCY | TGE    | IST | MP  | YQ | L  |   |
| tr A0A1W9LXP4 A0A1W9LXP4_9DELT | ..IG.....H..SDENR  | ENP  | CFCLCSRLRRK    | IF            | EIAEEL  | G          | CCKKIALGHHK | DDIET    | FF     | LNLMCY | TGE    | IST | MP  | YQ | L  |   |
| tr A0A1W9TE89 A0A1W9TE89_9DELT | ..VG.....H..GPNR   | ENP  | CFCLCSRLRRK    | IF            | EIAEEL  | G          | CCKKIALGHNK | DDIET    | FF     | LNLMCY | TGE    | IST | MP  | YQ | L  |   |
| tr A0A1W9MR5F A0A1W9MR5F_9DELT | ..IA.....H..SPQNR  | ENP  | CFCLCARLRRK    | IF            | EIADEL  | G          | CCKKIALGHNK | DDIET    | FF     | LNLMCY | TGE    | IST | MP  | YQ | L  |   |
| tr A0A1F9XAQ0 A0A1F9XAQ0_9BACT | .....V..P..G       | GEKK | IN             | CFWCANRRK     | TF      | TLAKEL     | G           | SKVALAHH | DDVET  | FF     | LNLMCY | TGE | IST | MP | YQ | L |
| tr A0A2N1TLK9 A0A2N1TLK9_9SPTR | .....E..Q          | ALSP | CFCLCSWHRK     | LF            | RFCEHR  | G          | CCKKIALGHH  | DDIET    | FF     | LNLMCY | TGE    | IST | MP  | YQ | L  |   |
| tr A0A2J0L3R7 A0A2J0L3R7_9BACT | .....K..DPKK       | NP   | CFVCSWHRK      | LF            | RLAAKL  | C          | CCKKIALAHH  | DDIET    | IT     | LNLMCY | TGE    | IST | MP  | YQ | L  |   |
| tr S7VA23 S7VA23_DESML         | ..LS.....H..SDVNL  | ENP  | CFCLCSRLRRK    | IF            | EVAREL  | G          | CCKKIALGHNK | DDIET    | FF     | LNLMCY | TGE    | IST | MP  | YQ | L  |   |
| tr A0A0S8AN01 A0A0S8AN01_9DELT | ..TA.....A..A..V   | GL   | CYHCARLRRN     | LF            | EIAEEQ  | G          | CNKISFGHHK  | DDIET    | FF     | LNLMCY | TGE    | IST | MP  | YQ | L  |   |
| tr A0A1V6ILX3 A0A1V6ILX3_9DELT | .....NNK           | GDYN | CFVCSWNRRK     | LF            | NLAHEK  | G          | TKIVFAHH    | DDIET    | FF     | LNLMCY | TGE    | IST | MP  | YQ | L  |   |
| tr A0A1G                       |                    |      |                |               |         |            |             |          |        |        |        |     |     |    |    |   |

tr|K0TEQ7|K0TEQ7\_THAOC . . . . . E. GKAY . . . . . C|S|L|C|R|L|R|R|G|V|L|Y . . . . . T|V|A|H|E|L|Q|C|N|K|I|A|L|G|H|H|G|D|D|S|M|E|T|L|L|L|N|M|V|H|G|G|T|L|K|G|M|P|A|R|Y  
tr|A0A1F7WSR4|A0A1F7WSR4\_9BACT . . . . . K. AKDG . . . . . C|F|Y|C|S|R|Q|R|R|S|I|L|F . . . . . R|L|A|D|A|N|N|C|Q|K|V|A|L|G|H|H|M|D|D|F|I|E|T|A|L|M|A|M|Y|N|G|R|I|E|T|M|L|P|I|F  
tr|A0A1V5UNH9|A0A1V5UNH9\_9BACT . . . . . K. AKDG . . . . . C|F|Y|C|S|R|Q|R|R|S|I|L|F . . . . . R|L|A|D|A|N|N|C|Q|K|I|A|L|G|H|H|L|D|D|F|I|E|T|A|L|M|S|M|Y|N|G|R|I|E|T|M|L|P|I|F  
tr|D8EW05|D8EW05\_9DELTA . . . . . H. . . . . GAENRE . . . . . C|F|L|C|R|M|R|R|K|L|L|F . . . . . E|M|A|D|A|L|E|C|N|R|I|A|L|G|H|H|K|D|D|I|E|T|L|F|L|N|I|F|Y|G|A|S|I|S|T|L|P|V|Q  
tr|A0A2M7WL85|A0A2M7WL85\_9BACT . . . . . A. DDM . . . . . C|S|F|C|S|R|L|R|R|G|V|L|Y . . . . . D|V|C|L|K|L|G|Y|N|K|I|A|L|G|H|N|A|D|D|V|I|E|T|L|L|L|N|Q|F|Y|S|G|A|L|S|G|M|P|K|L|  
tr|A0A2N2L507|A0A2N2L507\_9DELTA . . . . . H. . . . . SDYNKN . . . . . C|F|L|C|R|L|R|R|G|V|L|Y . . . . . E|I|A|A|E|G|C|N|K|I|A|F|A|H|R|D|D|I|E|T|L|L|I|N|M|F|Y|G|R|E|I|S|T|L|P|N|Q  
tr|A0A2V8MSX9|A0A2V8MSX9\_9BACT . . . . . H. G. . . . . C|D|I|C|S|R|H|R|R|Y|N|L|Y . . . . . K|I|A|T|E|L|H|C|G|V|L|A|L|G|H|T|A|D|D|C|A|E|S|L|L|R|N|V|L|F|N|G|R|I|A|S|L|P|V|S  
tr|A0A2V8IYI6|A0A2V8IYI6\_9BACT . . . . . H. G. . . . . C|D|V|C|R|H|R|R|Y|N|L|Y . . . . . K|I|A|S|E|L|Q|C|S|V|L|A|L|G|H|T|A|D|D|C|A|E|S|L|L|R|N|V|L|F|N|G|R|I|A|S|L|P|T|S  
tr|A0A1Q7Q2X8|A0A1Q7Q2X8\_9BACT . . . . . H. G. . . . . C|D|V|C|R|H|R|R|Y|N|L|Y . . . . . K|I|A|S|E|L|Q|C|S|V|L|A|L|G|H|T|A|D|D|C|A|E|S|L|L|R|N|V|L|F|N|G|R|I|A|S|L|P|V|S  
tr|A0A1E7FQ90|A0A1E7FQ90\_9STRA . . . . . P. DK . . . . . C|T|M|C|S|R|L|R|R|G|I|Y . . . . . S|K|A|I|E|L|Q|C|N|K|I|V|L|G|H|H|A|D|D|S|L|E|T|L|V|L|N|L|H|V|G|Q|M|K|A|P|A|Y|  
tr|W0E7L8|W0E7L8\_MARPU . . . . . . . . . . GDSF . . . . . C|A|Y|C|S|R|M|R|R|G|I|Y . . . . . R|L|C|R|E|H|G|Y|N|V|L|A|L|G|Q|H|L|D|D|L|A|E|S|L|M|S|L|F|H|G|Q|L|R|T|M|K|A|Y|  
tr|W0DRV9|W0DRV9\_9GAMM . . . . . . . . . . KDSF . . . . . C|A|F|C|A|R|M|R|R|G|I|Y . . . . . R|T|A|R|E|Q|G|Y|N|V|L|A|L|G|Q|H|L|D|D|L|A|E|S|F|L|M|S|A|F|H|G|Q|L|R|T|M|K|A|Y|  
tr|A0A0U5IH88|A0A0U5IH88\_9GAMM . . . . . . . . . . GDSF . . . . . C|A|Y|C|S|R|M|R|R|G|I|Y . . . . . R|I|C|R|E|Q|G|Y|G|V|L|A|L|A|Q|H|L|D|D|L|A|E|S|L|M|S|L|F|H|G|Q|L|R|T|M|K|A|Y|  
tr|A0A1F6SXEO|A0A1F6SXEO\_9PROT . . . . . . . . . . GDSF . . . . . C|A|F|C|A|R|L|R|R|G|V|L|Y . . . . . D|V|A|R|K|E|G|Y|N|V|L|A|L|G|H|H|L|D|D|L|A|E|S|F|L|M|S|A|F|F|G|G|R|L|G|T|M|K|A|Y|  
tr|A0A259RK82|A0A259RK82\_9GAMM . . . . . . . . . . GDSY . . . . . C|A|F|C|A|R|M|R|R|G|I|Y . . . . . K|A|A|R|R|E|G|Y|N|V|L|A|L|G|Q|H|L|D|D|L|A|E|S|F|L|M|S|A|F|H|G|G|K|L|N|T|M|K|A|Y|  
tr|A0A2M7W840|A0A2M7W840\_9PROT . . . . . N.ASY . . . . . C|S|F|C|S|R|L|R|R|G|I|Y . . . . . Q|I|A|R|T|Q|G|Y|N|V|L|A|L|A|H|H|Q|D|D|I|A|Q|S|F|L|M|S|A|F|Y|N|G|K|L|W|T|M|A|P|N|Y|  
tr|A0A1V5H9F1|A0A1V5H9F1\_9BACT . . . . . A.ERP . . . . . C|A|F|C|S|R|L|R|R|G|Q|L|Y . . . . . A|A|A|R|R|R|Q|C|N|V|I|A|L|G|H|H|M|D|D|L|C|V|S|F|L|M|S|V|F|R|G|G|L|R|T|M|A|P|V|C  
tr|A0A0W1RTX5|A0A0W1RTX5\_9GAMM . . . . . GDSY . . . . . C|S|F|C|S|R|L|R|R|G|I|Y . . . . . R|L|A|R|D|K|G|Y|N|V|L|A|L|A|Q|H|L|D|D|L|A|E|S|F|M|S|A|F|H|G|K|L|N|T|M|K|A|Y|  
tr|H1G0J5|H1G0J5\_9GAMM . . . . . . . . . . NHSY . . . . . C|S|F|C|S|R|M|R|R|G|I|Y . . . . . R|T|A|R|E|Q|G|Y|N|V|I|A|L|G|Q|H|L|D|D|L|A|E|S|F|L|M|S|A|F|H|G|G|L|R|T|M|K|A|Y|  
tr|A0A1N6H77|A0A1N6H77\_9GAMM . . . . . . . . . . GDSF . . . . . C|S|F|C|A|R|K|R|R|G|I|Y . . . . . T|V|C|R|R|E|G|Y|N|V|L|A|L|A|Q|H|L|D|D|L|A|E|S|F|L|M|S|A|F|H|G|G|L|R|T|M|K|A|Y|  
tr|I3CE71|I3CE71\_9GAMM . . . . . . . . . . RGD . . . . . C|A|Y|C|S|R|M|R|R|G|I|Y . . . . . S|T|A|R|Q|A|G|Y|N|V|L|A|L|A|Q|H|L|D|D|L|A|E|S|F|M|S|A|F|H|G|G|R|L|Q|T|M|K|A|Y|  
tr|A0A1H6FDH4|A0A1H6FDH4\_9GAMM . . . . . . . . . . GDSF . . . . . C|A|Y|C|A|R|M|R|R|G|I|Y . . . . . T|T|A|R|E|A|G|Y|N|V|L|V|A|Q|H|L|D|D|L|A|E|S|F|L|M|S|A|F|F|G|Q|L|R|T|M|K|A|Y|  
tr|A0A1Z4VND3|A0A1Z4VND3\_9GAMM . . . . . . . . . . KDSY . . . . . C|S|W|C|A|R|M|R|R|G|T|Y . . . . . T|T|A|R|E|A|G|C|N|V|L|A|L|G|Q|H|L|D|D|L|A|E|S|F|L|M|S|A|F|H|G|R|L|R|T|M|K|A|Y|  
tr|A0A191Z1I6|A0A191Z1I6\_9GAMM . . . . . . . . . . GDSY . . . . . C|A|F|C|A|R|M|R|R|G|I|Y . . . . . K|A|A|R|R|E|G|Y|N|V|L|A|L|A|Q|H|L|D|D|L|A|E|S|F|L|M|S|A|F|H|G|G|K|L|N|T|M|K|A|Y|  
tr|A0A1B1YWK5|A0A1B1YWK5\_9GAMM . . . . . . . . . . GRTL . . . . . C|A|F|C|S|R|M|R|R|G|I|Y . . . . . G|L|A|R|E|H|G|Y|N|T|L|A|A|H|H|L|D|D|V|A|E|T|F|L|M|N|A|F|F|G|Q|L|R|A|M|P|A|V|Y|  
tr|A0A0G3G524|A0A0G3G524\_9GAMM . . . . . . . . . . NDSF . . . . . C|S|F|C|S|R|M|R|R|G|I|Y . . . . . R|T|A|R|E|H|G|Y|N|V|L|A|L|G|Q|H|L|D|D|L|A|E|S|F|M|S|A|F|H|G|Q|L|R|T|M|K|A|Y|  
tr|A0A1V2ZXF9|A0A1V2ZXF9\_9GAMM . . . . . . . . . . NDSF . . . . . C|S|F|C|S|R|M|R|R|G|I|Y . . . . . R|T|A|R|E|H|G|Y|N|V|L|A|L|G|Q|H|L|D|D|L|A|E|S|F|L|M|S|A|F|H|G|Q|L|R|T|M|K|A|Y|  
tr|A0A0T5Z793|A0A0T5Z793\_9GAMM . . . . . . . . . . GDSF . . . . . C|S|Y|C|A|R|M|R|R|G|I|Y . . . . . S|T|C|R|Q|Q|G|Y|N|V|L|A|L|A|Q|H|L|D|D|L|A|E|S|L|M|S|T|F|H|G|Q|L|R|T|M|K|A|Y|  
tr|A0A167BM25|A0A167BM25\_9GAMM . . . . . . . . . . NHSY . . . . . C|A|F|C|S|R|M|R|R|G|I|Y . . . . . R|T|A|R|E|H|G|Y|T|A|L|G|Q|H|L|D|D|L|A|E|S|F|L|M|A|F|N|G|R|L|R|T|M|K|A|Y|  
tr|A0A1V6FEE6|A0A1V6FEE6\_9BACT . . . . . E.ERP . . . . . C|S|L|C|R|L|R|R|G|Q|L|H . . . . . A|A|D|R|L|N|C|N|K|I|A|L|G|Q|L|D|D|L|C|V|S|F|L|M|A|F|R|G|G|L|K|T|M|G|P|N|V|  
tr|I3YFC1|I3YFC1\_THIV6 . . . . . GDSF . . . . . C|A|Y|C|S|R|M|R|R|G|I|Y . . . . . R|I|C|R|E|Q|G|Y|N|V|L|A|L|G|Q|H|L|D|D|L|A|E|S|L|M|S|L|F|H|G|Q|L|R|T|M|K|A|Y|  
tr|A0A1V3NV21|A0A1V3NV21\_9GAMM . . . . . . . . . . NDSY . . . . . C|A|F|C|S|R|M|R|R|G|I|Y . . . . . R|T|A|R|E|H|G|Y|N|V|I|A|A|Q|H|L|D|D|L|A|E|S|F|L|M|S|A|F|H|G|G|L|R|T|M|K|A|Y|  
tr|D3RS48|D3RS48\_ALLVD . . . . . GDSF . . . . . C|A|Y|C|S|R|M|R|R|G|I|Y . . . . . R|L|C|R|E|H|G|Y|N|V|L|A|L|G|Q|H|L|D|D|L|A|E|S|L|M|S|L|F|H|G|Q|L|R|T|M|K|A|Y|  
tr|A0A2I2A5R9|A0A2I2A5R9\_9GAMM . . . . . GDSF . . . . . C|S|F|C|S|R|H|R|R|G|I|Y . . . . . S|V|C|R|R|E|G|Y|N|V|L|A|L|A|Q|H|L|D|D|L|A|E|S|L|M|S|A|F|N|A|G|G|L|R|T|M|K|A|Y|  
tr|A0A0S8L2L3|A0A0S8L2L3\_9PROT . . . . . GDSF . . . . . C|A|Y|C|A|R|M|R|R|G|I|Y . . . . . A|A|A|R|R|E|G|Y|D|V|L|V|M|G|Q|H|L|D|D|L|A|E|S|F|L|M|A|A|F|H|G|R|L|R|T|M|K|A|Y|  
tr|A0A251X597|A0A251X597\_9GAMM . . . . . K.GDSY . . . . . C|A|Y|C|A|R|M|R|R|G|I|Y . . . . . T|T|A|R|Q|N|G|Y|N|T|L|V|L|A|Q|H|L|D|D|L|A|E|S|F|L|M|S|A|F|H|G|R|L|R|T|M|K|A|Y|  
tr|A1AWM5|A1AWM5\_RUTMC . . . . . GNSY . . . . . C|S|F|C|A|R|I|K|R|G|I|Y . . . . . Q|V|A|R|R|E|G|Y|N|V|L|A|L|G|Q|H|L|D|D|L|A|E|S|L|M|S|T|C|H|N|G|K|I|Q|T|M|K|A|Y|  
tr|A0A2A4Y8M7|A0A2A4Y8M7\_9GAMM . . . . . KPSY . . . . . C|A|F|C|S|R|I|K|R|G|I|Y . . . . . R|V|L|R|D|E|G|Y|N|V|L|A|L|G|Q|H|L|D|D|L|A|E|S|F|L|S|A|F|H|G|Q|L|R|T|M|K|A|Y|  
tr|S6AB33|S6AB33\_9PROT . . . . . GDSY . . . . . C|A|Y|C|S|R|M|R|R|G|I|Y . . . . . R|V|A|R|E|N|G|Y|N|V|L|A|L|A|Q|H|L|D|D|L|A|E|S|F|M|N|A|F|F|G|G|R|L|R|T|M|K|P|S|Y|  
tr|B7J9K8|B7J9K8\_ACIF2 . . . . . RPSY . . . . . C|S|F|C|A|R|M|R|R|G|V|L|Y . . . . . R|C|A|R|R|E|G|Y|Q|V|L|A|L|G|Q|H|L|D|D|F|A|E|S|F|M|S|F|Y|N|G|K|L|R|T|M|K|A|Y|  
tr|A0A2N2ADN2|A0A2N2ADN2\_9GAMM . . . . . D.PGFSF . . . . . C|A|F|C|A|R|M|R|R|G|I|Y . . . . . S|T|A|R|R|E|G|Y|N|V|L|A|L|G|Q|H|L|D|D|L|A|E|S|F|L|M|S|A|H|R|G|Q|L|R|T|M|K|A|Y|  
tr|A0A1Y1QE10|A0A1Y1QE10\_9GAMM . . . . . NDSY . . . . . C|A|F|C|S|R|M|R|R|G|I|Y . . . . . R|T|A|R|E|H|G|Y|N|V|L|A|L|A|Q|H|L|D|D|L|A|E|S|F|L|M|S|A|F|H|G|G|K|L|T|M|K|A|Y|  
tr|A0A1Y1QFH0|A0A1Y1QFH0\_9GAMM . . . . . NDSY . . . . . C|A|F|C|S|R|M|R|R|G|I|Y . . . . . R|T|A|R|E|H|G|Y|N|V|L|A|L|G|Q|H|L|D|D|L|A|E|S|F|L|M|S|A|F|H|G|G|K|L|T|M|K|A|Y|  
tr|A0A1G5QYX5|A0A1G5QYX5\_9GAMM . . . . . E.KSFSF . . . . . C|A|F|C|A|R|M|R|R|G|I|Y . . . . . S|T|A|R|S|E|G|Y|N|V|I|A|L|A|Q|H|L|D|D|L|A|E|S|F|L|M|S|A|F|H|G|Q|L|R|T|M|K|A|Y|  
tr|A0A1I4R3K0|A0A1I4R3K0\_ECTMO . . . . . NHAY . . . . . C|A|F|C|S|R|M|R|R|G|I|Y . . . . . A|T|A|R|E|H|G|Y|N|V|V|A|L|G|Q|H|L|D|D|L|A|E|S|F|L|M|S|A|F|H|G|G|R|L|R|T|M|K|A|Y|  
tr|A0A0S8A3Y3|A0A0S8A3Y3\_9GAMM . . . . . KVSY . . . . . C|S|F|C|S|R|M|R|R|G|I|Y . . . . . A|T|A|R|E|G|Y|N|V|L|A|L|G|Q|H|L|D|D|L|A|E|S|F|L|M|S|A|F|H|G|Q|L|R|T|M|K|A|Y|  
tr|A0A1I1V1C9|A0A1I1V1C9\_9GAMM . . . . . GDSF . . . . . C|S|F|C|S|R|M|R|R|G|I|Y . . . . . T|A|R|E|G|G|Y|N|V|L|A|L|G|Q|H|L|D|D|L|A|E|S|F|L|M|S|A|F|H|G|Q|L|R|T|M|Q|A|Y|  
tr|A0A2S0KWB3|A0A2S0KWB3\_9BACT . . . . . E.GT . . . . . C|V|L|C|R|L|R|R|G|Q|L|H . . . . . G|L|A|A|E|G|C|G|K|I|A|L|G|Q|H|F|D|D|I|A|A|S|F|L|M|S|L|F|R|G|G|L|S|T|M|G|P|N|V|  
tr|A0A1W9L8C2|A0A1W9L8C2\_9GAMM . . . . . K.AETSTA . . . . . H.QSF . . . . . C|A|F|C|A|R|M|R|R|G|I|Y . . . . . T|T|A|R|Q|N|Y|T|V|L|A|L|G|Q|H|L|D|D|L|A|E|S|F|L|M|S|A|Y|N|G|L|R|T|M|K|A|Y|  
tr|A0A0S7ZXH3|A0A0S7ZXH3\_9GAMM . . . . . KLSH . . . . . C|T|Y|C|A|R|I|K|R|N|I|Y . . . . . A|T|A|R|R|E|G|Y|N|V|L|A|L|A|Q|H|L|D|D|L|A|E|S|F|L|M|S|S|F|Y|S|Q|L|R|T|M|K|A|Y|  
tr|A0A1F3X099|A0A1F3X099\_9PROT . . . . . KDSY . . . . . C|A|F|C|S|R|M|R|R|G|I|Y . . . . . G|C|A|R|R|E|G|Y|K|V|L|A|L|A|Q|H|L|D|D|A|V|E|T|F|L|M|S|A|F|F|G|G|R|L|R|T|M|K|A|Y|  
tr|A0A1G0KZY9|A0A1G0KZY9\_9GAMM . . . . . GDSF . . . . . C|A|Y|C|S|R|M|R|R|G|I|Y . . . . . R|L|C|R|K|H|G|Y|N|V|L|A|L|G|Q|H|L|D|D|L|A|E|S|L|M|S|L|F|H|G|Q|L|R|T|M|K|A|Y|  
tr|A0A1W9X6P0|A0A1W9X6P0\_9GAMM . . . . . Q.RK . . . . . C|A|Y|C|A|R|M|R|R|G|I|Y . . . . . R|I|A|R|E|Q|D|C|N|V|L|A|L|A|Q|H|L|D|D|L|A|E|S|F|L|M|S|T|L|Y|S|G|R|L|R|T|M|K|A|Y|  
tr|F6DB14|F6DB14\_THICA . . . . . GDSF . . . . . C|S|F|C|S|R|H|R|R|G|Q|L|Y . . . . . T|V|C|R|E|G|G|Y|N|V|L|A|L|A|Q|H|L|D|D|L|T|E|S|F|V|M|S|A|F|N|A|G|Q|L|R|T|M|K|A|Y|  
tr|A0A1V5UV62|A0A1V5UV62\_9BACT . . . . . ERNP . . . . . C|M|L|C|R|L|R|R|G|I|Y . . . . . T|L|A|K|K|L|R|C|N|K|I|A|L|G|Q|H|L|D|D|T|A|V|S|F|L|M|N|L|C|R|G|A|G|L|S|T|M|G|P|N|V|  
tr|A0A1T2LC98|A0A1T2LC98\_9GAMM . . . . . GNSF . . . . . C|A|Y|C|S|R|M|R|R|G|I|Y . . . . . S|T|C|R|K|E|G|Y|N|V|L|A|L|A|Q|H|L|D|D|L|A|E|S|L|M|S|I|F|H|G|Q|L|R|T|M|K|A|Y|  
tr|A0A2N9YAV2|A0A2N9YAV2\_9GAMM . . . . . RGD . . . . . C|A|Y|C|S|R|M|R|R|G|I|Y . . . . . S|T|A|R|K|E|G|Y|N|V|L|A|L|A|Q|H|L|D|D|L|A|E|S|F|L|M|S|A|F|H|G|G|R|L|Q|T|M|K|A|Y|  
tr|A0A2H6JDM1|A0A2H6JDM1\_9BACT . . . . . NTSF . . . . . C|A|F|C|A|R|M|R|R|G|I|Y . . . . . D|I|A|R|R|E|G|Y|T|V|L|A|L|G|Q|H|L|D|D|A|E|S|F|L|M|S|A|F|H|G|G|R|L|R|T|M|K|A|Y|  
tr|A0A1Q4GEE4|A0A1Q4GEE4\_9PROT . . . . . SDSY . . . . . C|A|Y|C|S|R|M|R|R|G|I|Y . . . . . R|I|A|R|E|Q|G|Y|N|V|L|A|L|A|Q|H|L|D|D|L|A|E|T|L|M|S|L|F|G|G|K|L|R|T|M|S|P|H|Y|  
tr|A0A257SZR7|A0A257SZR7\_9GAMM . . . . . NDSF . . . . . C|A|F|C|S|R|M|R|R|G|V|L|Y . . . . . D|T|A|R|R|E|G|Y|N|V|L|A|L|A|Q|H|L|D|D|V|A|E|S|F|L|M|S|A|F|H|G|G|R|L|R|T|M|K|A|Y|  
tr|A0A1J4Z8U3|A0A1J4Z8U3\_9PROT . . . . . GDSF . . . . . C|A|Y|C|S|R|M|R|R|G|I|Y . . . . . R|T|A|R|Q|Q|G|Y|K|V|L|A|L|A|Q|H|L|D|D|L|A|E|T|F|M|S|A|F|F|G|G|R|L|R|T|M|K|A|Y|  
tr|A0A258YXM3|A0A258YXM3\_9PROT . . . . . SDSF . . . . . C|A|Y|G|S|R|M|R|R|G|I|Y . . . . . R|I|A|R|E|Q|N|C|N|V|V|A|L|A|Q|H|L|D|D|L|A|E|T|L|M|S|L|F|G|G|K|L|R|T|M|S|P|H|Y|  
tr|A0A2G6DJM5|A0A2G6DJM5\_9PROT . . . . . NNSY . . . . . C|A|F|C|S|R|M|R|R|G|I|Y . . . . . K|T|A|R|E|G|Y|N|V|L|A|L|A|Q|H|L|D|D|L|A|E|S|F|L|M|S|A|F|H|G|G|K|L|R|T|M|K|A|Y|  
tr|A0A2V2ZH125|A0A2V2ZH125\_9BACT . . . . . TATP . . . . . C|V|L|C|R|L|R|R|G|Q|L|Y . . . . . G|L|A|R|E|L|A|C|N|K|I|A|L|G|Q|H|F|D|D|I|A|A|S|F|L|M|S|L|C|R|G|Q|L|S|T|M|G|P|N|V|  
tr|S6BUZ7|S6BUZ7\_9GAMM . . . . . GDSF . . . . . C|A|Y|C|A|R|M|R|R|G|I|Y . . . . . S|T|C|R|R|H|G|Y|N|V|L|A|L|A|Q|H|L|D|D|L|A|E|S|F|L|M|P|A|F|H|G|G|R|L|R|T|M|K|A|Y|  
tr|A0A1W1LDV63|A0A1W1LDV63\_9ZZZZ . . . . . GDSY . . . . . C|S|F|C|S|R|I|K|R|G|I|Y . . . . . K|V|A|R|E|G|Y|N|V|L|A|L|G|Q|H|L|D|D|L|S|E|S|M|S|C|H|N|G|K|I|Q|T|M|K|A|Y|  
tr|A0A1W1LDVN7|A0A1W1LDVN7\_9ZZZZ . . . . . GDSY . . . . . C|S|F|C|A|R|I|K|R|G|I|Y . . . . . K|V|A|R|E|Q|G|Y|N|V|L|A|L|G|Q|H|L|D|D|L|A|E|S|L|M|S|M|C|H|N|G|K|I|Q|T|M|K|A|Y|  
tr|L0GXD5|L0GXD5\_9GAMM . . . . . GDSF . . . . . C|A|Y|C|A|R|M|R|R|G|I|Y . . . . . R|L|C|R|E|Q|G|Y|G|V|L|A|L|G|Q|H|L|D|D|L|A|E|S|L|M|S|I|F|H|G|Q|L|R|T|M|K|A|Y|  
tr|A0A1B4V026|A0A1B4V026\_9GAMM . . . . . GDSF . . . . . C|A|Y|C|A|R|M|R|R|G|I|Y . . . . . D|V|A|R|R|E|D|Y|N|V|L|V|L|A|Q|H|L|D|D|L|A|E|S|F|L|M|S|A|F|H|G|G|Q|L|R|T|M|K|A|Y|  
tr|A0A1C2G3X4|A0A1C2G3X4\_9GAMM . . . . . NDSF . . . . . C|S|Y|C|A|R|M|R|R|G|I|Y . . . . . R|V|A|R|D|H|G|Y|N|V|L|A|L|A|Q|H|L|D|D|L|A|E|S|F|L|M|S|A|F|H|A|G|T|L|H|T|M|K|A|Y|  
tr|A0A1T2L835|A0A1T2L835\_9GAMM . . . . . E.KPFSY . . . . . C|A|Y|C|S|R|M|R|R|G|I|Y . . . . . T|T|L|R|N|E|G|Y|N|V|L|A|L|A|Q|H|L|D|D|L|A|E|S|F|L|M|S|A|F|Y|R|G|Q|L|R|T|M|K|A|Y|  
tr|A0A1Y0G9Z9|A0A1Y0G9Z9\_9PROT . . . . . GDSF . . . . . C|A|Y|C|S|R|M|R|R|G|I|Y . . . . . R|V|A|R|E|N|H|Y|N|V|L|A|L|A|Q|H|L|D|D|L|A|E|T|F|M|S|A|F|F|G|G|R|L|R|T|M|Q|A|Y|  
tr|A0A090ADU8|A0A090ADU8\_9GAMM . . . . . HGKSF . . . . . C|A|Y|C|A|R|M|R|R|G|I|Y . . . . . S|T|A|R|Q|Q|G|Y|N|V|L|A|L|A|Q|H|L|D|D|L|A|E|S|F|L|M|S|A|Y|A|H|Q|L|R|T|M|K|A|Y|  
tr|A0A0M1JJT8|A0A0M1JJT8\_9GAMM . . . . . GNSY . . . . . C|A|Y|C|A|R|M|R|R|G|I|Y . . . . . S|L|C|R|K|H|D|Y|N|V|L|A|L|A|Q|H|F|D|D|T|A|E|S|L|M|S|M|F|H|G|Q|L|R|T|M|K|A|Y|  
tr|A0A2G6C8I0|A0A2G6C8I0\_9GAMM . . . . . GDSY . . . . . C|S|F|C|S|R|I|K|R|G|I|Y . . . . . K|I|A|R|N|N|G|Y|N|V|I|A|L|G|Q|H|L|D|D|L|A|E|S|F|L|M|S|A|F|H|G|Q|L|R|T|M|K|A|Y|  
tr|W0TIV9|W0TIV9\_9GAMM . . . . . GDSF . . . . . C|A|Y|C|A|R|M|R|R|G|I|Y . . . . . S|T|C|R|E|Q|G|Y|N|V|L|A|L|A|Q|H|L|D|D|L|A|E|S|F|L|M|S|A|F|H|G|Q|L|R|T|M|K|A|Y|  
tr|A5CWN0|A5CWN0\_VESOH . . . . . GNSY . . . . . C|S|F|C|A|R|I|K|R|G|I|Y . . . . . Q|V|A|R|R|E|G|Y|N|V|L|A|L|G|H|H|L|D|D|L|A|E|S|L|M|S|M|C|H|N|G|K|I|Q|T|M|K|A|Y|  
tr|A0A0E9MCP1|A0A0E9MCP1\_9PROT . . . . . GDSF . . . . . C|A|F|C|A|R|M|R|R|G|I|Y . . . . . R|T|A|R|E|N|G|Y|N|V|L|A|L|A|Q|H|L|D|D|A|E|T|F|L|M|S|T|F|F|G|G|K|L|R|T|M|Q|A|Y|  
tr|V4JHL8|V4JHL8\_9GAMM . . . . . GDSF . . . . . C|A|Y|C|A|R|M|R|R|G|I|Y . . . . . R|L|C|R|E|Q|G|Y|N|V|L|A|L|A|Q|H|L|D|D|L|A|E|S|L|M|S|F|H|A|G|Q|L|R|T|M|K|A|Y|  
tr|A0A1P8UKQ4|A0A1P8UKQ4\_9GAMM . . . . . NDSY . . . . . C|A|F|C|A|R|M|R|R|G|V|Y . . . . . S|T|A|R|R|E|G|Y|N|V|I|A|L|A|Q|H|L|D|D|L|A|E|S|F|L|M|S|A|F|H|G|R|L|R|T|M|K|A|Y|  
tr|A0A0S8DUY2|A0A0S8DUY2\_9GAMM . . . . . GDSF . . . . . C|A|Y|C|S|R|M|R|R|G|I|Y . . . . . T|T|V|R|N|E|G|Y|N|V|L|A|L|A|Q|H|L|D|D|L|A|E|S|F|L|M|S|A|F|H|G|Q|L|R|T|M|K|A|Y|  
tr|H8Z182|H8Z182\_9GAMM . . . . . GDSF . . . . . C|A|Y|C|A|R|M|R|R|G|I|Y . . . . . R|L|C|R|E|H|G|Y|G|V|L|A|L|G|Q|H|L|D|D|L|E|S|M|S|F|H|G|Q|L|R|T|M|K|A|Y|  
tr|A0A1F6TVT2|A0A1F6TVT2\_9PROT . . . . . GDSF . . . . . C|A|Y|C|S|R|M|R|R|G|I|Y . . . . . A|T|A|R|A|E|G|Y|N|V|L|V|A|Q|H|L|D|D|V|A|E|S|F|L|M|S|A|F|H|G|S|L|R|T|M|K|A|Y|  
tr|A0A1E2UNR3|A0A1E2UNR3\_9GAMM . . . . . GDSF . . . . . C|A|Y|C|A|R|M|R|R|G|I|Y . . . . . S|T|C|R|N|Q|G|Y|N|V|L|A|L|A|Q|H|L|D|D|L|A|E|S|L|M|S|L|F|H|G|Q|L|R|T|M|K|A|Y|  
tr|A0A2T6NDJ0|A0A2T6NDJ0\_9GAMM . . . . . GNSF . . . . . C|A|Y|C|A|R|M|R|R|G|I|Y . . . . . T|T|G|R|E|G|Y|N|V|L|A|L|A|Q|H|L|D|D|L|A|E|S|L|M|S|F|H|G|Q|L|R|T|M|K|A|Y|  
tr|A0A1H6M1D9|A0A1H6M1D9\_9GAMM . . . . . GDSY . . . . . C|S|F|C|A|R|I|K|R|G|I|Y . . . . . Q|V|A|R|R|E|G|Y|N|V|L|A|L|G|Q|H|L|D|D|L|C|E|S|L|M|S|M|F|H|N|G|K|I|Q|T|M|K|A|Y|  
tr|E6QSG6|E6QSG6\_9ZZZZ . . . . . GDSF . . . . . C|A|F|C|S|R|M|R|R|G|I|Y . . . . . R|V|A|R|Q|H|D|Y|N|V|L|A|L|A|Q|H|L|D|D|L|A|E|T|F|L|M|S|M|F|F|G|G|R|L|R|T|M|K|A|Y|  
tr|A0A1W1CJ00|A0A1W1CJ00\_9ZZZZ . . . . . GDSY . . . . . C|A|F|C|A|R|M|R|R|G|I|Y . . . . . K|V|A|R|N|D|Y|N|V|L|A|L|G|Q|H|L|D|D|L|A|E|S|L|M|S|M|C|H|N|G|K|M|K|T|M|K|A|Y|  
tr|A0A2N6TKT8|A0A2N6TKT8\_FUSU . . . . . S.PENP . . . . . C|F|L|C|A|K|M|R|R|G|V|L|Y . . . . .



|                                  |                            |            |      |      |       |             |        |        |       |        |          |       |
|----------------------------------|----------------------------|------------|------|------|-------|-------------|--------|--------|-------|--------|----------|-------|
| tr G4D179 G4D179_9FIRM           | . . . . . S . DGYP         | CYMCARMRRG | NLY  | . AK | AQEL  | CNKALGHHF   | DDVIET | IM     | LNILF | AGNYKT | MMPKL    |       |
| tr A0A2N1QJ52 A0A2N1QJ52_9BACT   | . . . . . A . KENP         | CYLCARMRRG | LY   | . KI | AKAN  | CNKALGHHF   | DDVIET | TL     | LNMFY | AGQFKT | MLPKA    |       |
| tr D0GMS6 D0GMS6_9FUSO           | . . . . . A . KDYP         | CFLCAKMRRG | LY   | . KK | VEEL  | GYNKLT      | LGHFF  | DDVIET | TM    | INMFY  | AGTLKT   | MLPKV |
| tr A0A0E3Z9Z8 A0A0E3Z9Z8_9FUSO   | . . . . . D . PKKP         | CYMCARLRG  | GSLY | . SH | AVEL  | CNKALGHHM   | DDVDET | TV     | MSMFY | MKGFTK | TMLPKL   |       |
| tr A0A094I1J11 A0A094I1J11_9BACT | . . . . . G . KNDP         | CYMCARLRG  | LY   | . KM | AQDR  | CNKALGHHF   | DDVIET | TM     | MNLYA | GTFK   | TMLPKI   |       |
| tr A0A2N1Q4T2 A0A2N1Q4T2_9BACT   | . . . . . N . PKAP         | CFLCAKMRRG | LY   | . QA | KDGL  | CNKALGHHF   | DDVIET | TL     | MNMFY | AGTFK  | TMLPKA   |       |
| tr A0A1W9SAA9 A0A1W9SAA9_9BACT   | . . . . . N . PKAP         | CFLCAKMRRG | LY   | . QK | AKDL  | CNKALGHHF   | DDVIET | TL     | MNMFY | AGTFK  | TMLPKA   |       |
| tr A0A0E3UUB0 A0A0E3UUB0_9FUSO   | . . . . . A . PDSP         | CFLCAKMRRG | LY   | . KE | LEKM  | GYNKIALGHHF | DDVDET | TL     | INMFY | AGTFK  | TMLPKV   |       |
| tr A0A2A1ZTD9 A0A2A1ZTD9_9BACT   | . . . . . A . KDYP         | CYLCARMRRG | LY   | . NL | AKEK  | CNKALGHHF   | DDVIET | TL     | LNVL  | YAGTFK | TMLPKV   |       |
| tr R5FR46 R5FR46_9FIRM           | . . . . . G . GESF         | CYLCARMRRG | LY   | . DY | AKEE  | CNKALGHHF   | DDVIET | TL     | LNLI  | YAGE   | IRTM     | MLPKL |
| tr U7VDB0 U7VDB0_9FUSO           | . . . . . S . PDSP         | CFLCAKMRRG | LY   | . SK | VEEL  | GYNKALGHHF  | DDLDET | TL     | INMFY | AGTTK  | TMLPKV   |       |
| tr A0A1T4JV61 A0A1T4JV61_9FUSO   | . . . . . D . PNNP         | CFLCAKMRRG | LY   | . NK | VEEL  | GYNKALGHHF  | DDLDET | AL     | INMFY | AGTITK | MLPKV    |       |
| tr A0A1E9ISJ7 A0A1E9ISJ7_9FUSO   | . . . . . D . PESP         | CFLCAKMRRG | LY   | . NR | VEEL  | GYNKALGHHF  | DDVDET | TM     | INMFY | AGTITK | MLPKV    |       |
| tr C3WD69 C3WD69_FUSMR           | . . . . . D . PEGP         | CFLCAKMRRG | LY   | . NK | VEEL  | GYNKALGHHF  | DDVDET | TM     | INMFY | AGTITK | MLPKV    |       |
| tr A0A017H8K4 A0A017H8K4_9FUSO   | . . . . . D . PESP         | CFLCAKMRRG | LY   | . KK | VEEL  | CNKALGHHF   | DDVIET | TL     | INLFY | ASTV   | TKT      | MLPKV |
| tr R5HS15 R5HS15_9MOLU           | . . . . . T . DNP          | CYMCARLRG  | LY   | . DF | AKKL  | CNKALGHHF   | DDVIET | VM     | LNMLF | TGSF   | STMLPKI  |       |
| tr A0A1W9W0E5 A0A1W9W0E5_9BACT   | . . . . . N . PENP         | CFLCAKMRRG | LY   | . KK | VEEL  | GYNKALGHHF  | DDVIET | TM     | INMFY | AGTITK | MLPKV    |       |
| tr A0A137SW00 A0A137SW00_9FIRM   | . . . . . A . GERP         | CYMCARMRRG | NLY  | . AK | AKEL  | CNKALGHHM   | DDVDET | IL     | LNIF  | SANFKT | TMLPKL   |       |
| tr A0A2U1E5L2 A0A2U1E5L2_9FIRM   | . . . . . A . ADNP         | CFLCAKMRRG | LY   | . GQ | AEKL  | GANKIALGHHM | DDVDET | TL     | MNMF  | MQGSY  | RNMMPIL  |       |
| tr A0A175JJ18 A0A175JJ18_ENTHI   | . . . . . ED . AD . KNTF   | CLNCGNRRAL | LY   | . KF | AKEH  | GFTSIALGHHM | DDVAET | LL     | MNQLF | CGCVAT | IPAQF    |       |
| tr C3WD70 C3WD70_FUSMR           | . . . . . E . VKNP         | CFLCGRIRRG | LY   | . RM | MKEQ  | YNKIALGHHK  | DDIET  | FL     | MNVFY | QGNM   | KTMKPSY  |       |
| tr A0A1W9TJ18 A0A1W9TJ18_9BACT   | . . . . . S . PQNP         | CFLCAKMRRG | LY   | . KK | AEEL  | CNKALGHHF   | DDIET  | VL     | INMFY | SGNITK | MLPKV    |       |
| tr A0A2G6MQK6 A0A2G6MQK6_9DELT   | HS . . . . . D . E . NKANP | CFLCSRLRRK | LY   | . EL | AREHD | CCKALGHNK   | DDIET  | LF     | INIF  | YAGKIT | GMTKPRQ  |       |
| tr A0A1W1BBY5 A0A1W1BBY5_9ZZZZ   | . . . . . E . NSSF         | CSFFSRMRRG | LY   | . TY | AENN  | GYNKVALGHHF | DDAVES | FF     | MNMFY | NGS    | IRSLAPIY |       |
| tr I7H559 I7H559_9HELI           | . . . . . E . GTIY         | CSFCSRMRRG | LY   | . SK | ALEY  | GYNKIALAHHL | DDAAES | FF     | MNLT  | YNGAM  | RSMPPIY  |       |
| tr V8C7C8 V8C7C8_9HELI           | . . . . . E . GTIY         | CSFCSRMRRG | LY   | . TQ | ALQG  | GYNKIALGHHL | DDAAES | FF     | MNLT  | YNGAL  | RSMPPIY  |       |
| tr C3XIF2 C3XIF2_9HELI           | . . . . . E . GTIY         | CSFCSRMRRG | LY   | . SM | ALER  | GYNKIALAHHL | DDAAES | FF     | MNLT  | YNGAL  | RSMPPIY  |       |
| tr A0A1Y1RC03 A0A1Y1RC03_9PROT   | . . . . . E . NSY          | CSFFSRMRRG | LY   | . RA | ALEE  | GFTTVALGHHL | DDAAES | FF     | MNFL  | YNGAL  | RSMPPLY  |       |
| tr A0A1W1ED80 A0A1W1ED80_9ZZZZ   | . . . . . E . NSSF         | CSYFSRMRRG | LY   | . TY | AEKG  | GYNKVALGHHF | DDTVES | FF     | MNMF  | YNGS   | MRALAPIY |       |
| tr A0A1W1CKY4 A0A1W1CKY4_9ZZZZ   | . . . . . E . NSSF         | CSYFSRMRRG | LY   | . TF | AEQG  | GYNKVALGHHF | DDTVES | FF     | MNMFY | NGT    | MRALAPIY |       |
| tr A0A1W9NWV6 A0A1W9NWV6_9PROT   | . . . . . E . NSSF         | CSYFSRMRRG | LY   | . TF | AEQG  | GYNKVALGHHF | DDTVES | FF     | MNMFY | NGT    | MRALAPIY |       |
| tr I2K6H1 I2K6H1_9PROT           | . . . . . E . NSSF         | CSYFSRMRRG | LY   | . SF | AEQG  | GFTKVALGHHF | DDTVES | FF     | MNMFY | NGS    | MRALAPIY |       |
| tr A0A1W1BSJ9 A0A1W1BSJ9_9ZZZZ   | . . . . . E . NSSF         | CSYFSRMRRG | LY   | . SF | AEHG  | GYNKIALGHHF | DDTVES | FF     | MNMFY | NGS    | MRALAPIY |       |
| tr A0A2G2M8Q2 A0A2G2M8Q2_9PROT   | . . . . . E . NSSF         | CSYFSRMRRG | LY   | . SF | AEHG  | GFTKIALGHHF | DDTVES | FF     | MNMFY | NGS    | MRALAPIY |       |
| tr A0A2G2MUF3 A0A2G2MUF3_9PROT   | . . . . . E . NSSF         | CSYFSRMRRG | LY   | . SF | AEGN  | GFTKVALGHHF | DDTVES | FF     | MNMFY | NGS    | MRALAPIY |       |
| tr E6X2C6 E6X2C6_NITSE           | . . . . . E . GSSF         | CSYFSRMRRG | LY   | . SF | AEKG  | GYNKIALGHHF | DDAVES | FF     | MNMFY | NGV    | MRSLAPIY |       |
| tr A0A2G6GA80 A0A2G6GA80_9BACT   | . . . . . K . DSF          | CSFFSRMRRG | LY   | . EI | ARRK  | GYNKIALGHHL | DDAVES | FF     | MGLY  | NGK    | IRSLAPIY |       |
| tr A0A0S4PKX8 A0A0S4PKX8_9HELI   | . . . . . E . GTIY         | CSFCSRMRRG | LY   | . SK | ALEG  | GYNKIALAHHL | DDAAES | FF     | MNLT  | YNGAM  | RSMPPIY  |       |
| tr Q7VFR3 Q7VFR3_HELHP           | . . . . . E . GTIY         | CSFCSRMRRG | LY   | . SK | ALEG  | GYNKIALAHHL | DDAAES | FF     | MNLT  | YNGAM  | RSMPPIY  |       |
| tr A0A2D3WHB1 A0A2D3WHB1_9PROT   | . . . . . E . NSY          | CSYFSRMRRG | LY   | . TF | AEQN  | GYNKVALGHHF | DDTVES | FF     | MNMFY | NGT    | MRALAPIY |       |
| tr A0A1W1E1A6 A0A1W1E1A6_9ZZZZ   | . . . . . E . NSSF         | CSYFSRMRRG | LY   | . SY | AEDN  | GYNKVALGHHF | DDTVES | FF     | MNMFY | NGT    | MRAMAPIY |       |
| tr A0A1W1CNU7 A0A1W1CNU7_9ZZZZ   | . . . . . E . NSSF         | CSYFSRMRRG | LY   | . TY | AEKN  | GFDKVALGHHF | DDTVES | FF     | MNIF  | YNGT   | IRAMAPIY |       |
| tr A0A0C2ZBG5 A0A0C2ZBG5_9PROT   | . . . . . E . NSSF         | CSYFSRMRRG | LY   | . TF | AEQG  | GYNKVALGHHF | DDAVES | FF     | MNMFY | NGT    | MRSLAPIY |       |
| tr A0A0S4XP57 A0A0S4XP57_9PROT   | . . . . . E . NSSF         | CSYFSRMRRG | LY   | . TF | AEQG  | GFTKIALGHHF | DDAVES | FF     | MNMFY | NGS    | MRSLAPIY |       |
| tr A0A099TV95 A0A099TV95_9HELI   | . . . . . E . GSIY         | CSFCSRMRRG | LY   | . NI | ALQR  | GYNKIALAHHL | DDAAES | FF     | MNLT  | YNGS   | LRSMPPY  |       |
| tr A0A1W1E737 A0A1W1E737_9ZZZZ   | . . . . . E . NSSF         | CSYFSRMRRG | LY   | . SF | AEQG  | GFTKVALGHHF | DDMVES | FF     | MNMFY | NGS    | LRSLAPIY |       |
| tr A0A268TK66 A0A268TK66_9HELI   | . . . . . E . GSY          | CSFCSRMRRG | LY   | . SK | ALEY  | GYNKVAIAHHL | DDAAES | FF     | MNLT  | YNGS   | LRSLAPIY |       |
| tr A0A268U7R3 A0A268U7R3_9HELI   | . . . . . E . GSY          | CSFCSRMRRG | LY   | . SK | ALEM  | GYNKVAIAHHL | DDAAES | FF     | MNLT  | YNGS   | LRSLAPIY |       |
| tr A0A268TAM2 A0A268TAM2_9HELI   | . . . . . T . GSY          | CSFCSRMRRG | LY   | . AK | LEM   | GYNKVAIAHHL | DDAAES | FF     | MNLT  | YNGM   | LRSLAPIY |       |
| tr A0A268TTH0 A0A268TTH0_9HELI   | . . . . . E . GSY          | CSFCSRMRRG | LY   | . SK | ALEM  | GYNKVAIAHHL | DDAAES | FF     | MNLT  | YNGAL  | LRSMPPY  |       |
| tr V8CIS8 V8CIS8_9HELI           | . . . . . E . GTIY         | CSFCSRMRRG | LY   | . TL | ALEG  | GYNKIALGHHL | DDAVES | FF     | MNLS  | YNGAL  | LRSMPPY  |       |
| tr A0A1W1CJT9 A0A1W1CJT9_9ZZZZ   | . . . . . K . NSF          | CSFFSRMRRG | LY   | . SV | ALEL  | GYNKVALGHHL | DDAAES | FF     | MNFI  | YNGM   | LRSLAPKY |       |
| tr G2HW59 G2HW59_9PROT           | . . . . . K . NSF          | CSFFSRMRRG | LY   | . ST | AQEQ  | GYNKVALGHHL | DDAMES | FF     | MNFI  | YNGT   | MRSMPPY  |       |
| tr A6DBX7 A6DBX7_9PROT           | . . . . . P . GSP          | CGFCARMRRG | LY   | . SK | AKEL  | GYNKALGHHF  | DDAVET | FF     | MSMFY | NGM    | KSMPPKY  |       |
| tr A0A099DQ03 A0A099DQ03_9HELI   | . . . . . E . GTIY         | CSFCSRMRRG | LY   | . SK | ALEG  | GYNKIALAHHL | DDAAES | FF     | MNLT  | YNGS   | LRSMPPY  |       |
| tr A0A1V9VEV7 A0A1V9VEV7_9PROT   | . . . . . K . NSF          | CSFFSRMRRG | LY   | . TT | ALEQ  | GYNKVALGHHL | DDAMES | FF     | MNLF  | YNGT   | MRTPPIY  |       |
| tr C5ZWI6 C5ZWI6_9HELI           | . . . . . E . GSVY         | CSFCSRMRRG | LY   | . SK | ALEG  | GYNKIALAHHL | DDAAES | FF     | MNLT  | YNGAL  | LRSMPPY  |       |
| tr A0A099VW01 A0A099VW01_9HELI   | . . . . . E . GSVY         | CSFCSRMRRG | LY   | . TK | ALEG  | GYNKIALAHHL | DDAAES | FF     | MNLT  | YNGAL  | LRSMPPY  |       |
| tr A0A099TJT3 A0A099TJT3_9HELI   | . . . . . E . GTIY         | CSFCSRMRRG | LY   | . SK | ALEG  | GYNKIALAHHL | DDAAES | FF     | MNLT  | YNGAL  | LRSMPPY  |       |
| tr A0A259HBH4 A0A259HBH4_9PROT   | . . . . . P . NSF          | CSYFSRMRRG | LY   | . SY | AQEG  | GYNKVALGHHF | DDAMES | FF     | MNMFY | NGT    | MRSLAPIY |       |
| tr Q3OQR3 Q3OQR3_SULDN           | . . . . . K . NSF          | CSFFSRMRRG | LY   | . SA | QKY   | CYNKVALGHHM | DDAAES | FF     | MNFI  | YNGQ   | LRSLAPKY |       |
| tr A0A1G3US09 A0A1G3US09_9HELI   | . . . . . K . NSF          | CSFFSRMRRG | LY   | . SA | AEKY  | CYNKVALGHHM | DDAAES | FF     | MNFI  | YNGQ   | LRSLAPKY |       |
| tr I3XVB8 I3XVB8_SULBS           | . . . . . E . NSF          | CSFFSRMRRG | LY   | . TY | ALEH  | GYNKIALAHHL | DDAVES | FF     | MNFS  | YNGT   | LRSMPPKY |       |
| tr B9L800 B9L800_NAUPA           | . . . . . P . GSA          | CGFCARMRRG | LY   | . TK | ALEL  | GYNKIALGHHF | DDAVET | FF     | MSMFY | NGM    | KSMPPKY  |       |
| tr A0A2U8FFP3 A0A2U8FFP3_9HELI   | . . . . . E . GTIY         | CSFCSRMRRG | LY   | . SK | AIEG  | GYNKIALAHHL | DDAAES | FF     | MNLS  | YNGAL  | LRSMPPY  |       |
| tr A0A2D5P7H2 A0A2D5P7H2_9PROT   | . . . . . K . NSF          | CSFFSRMRRG | LY   | . TA | ALEG  | GYNKVALGHHL | DDAMES | FF     | MNFI  | YNGT   | MRTPPIY  |       |
| tr A0A268U8R8 A0A268U8R8_9HELI   | . . . . . E . GSY          | CSFCSRMRRG | LY   | . AK | AIEG  | GYNKVAIAHHL | DDAAES | FF     | MNLT  | YNGS   | LRSMPPY  |       |
| tr A0A1B1U570 A0A1B1U570_9HELI   | . . . . . E . GTIY         | CSFCSRMRRG | LY   | . SK | ALEG  | GYNKIALAHHL | DDAAES | FF     | MNLS  | YNGAL  | LRSMPPY  |       |
| tr A0A099B6Z7 A0A099B6Z7_9HELI   | . . . . . Q . GSIY         | CSFCSRMRRG | LY   | . QI | ALQQ  | GYNKVALAHHL | DDAAES | FF     | MNLT  | YNGS   | LRSMPPKY |       |
| tr A0A0C2ZDN3 A0A0C2ZDN3_9PROT   | . . . . . E . NSF          | CSYFSRMRRG | LY   | . NF | AQEH  | GFTKVALGHHF | DDTVES | FF     | MNMFY | NGS    | MRAMAPIY |       |
| tr A0A292YDX3 A0A292YDX3_9PROT   | . . . . . P . GSP          | CSFCARMRRG | LY   | . TK | ALEL  | GYNKALGHHF  | DDAVET | FF     | MGFLY | NGI    | MRSMPPKY |       |
| tr A7H006 A7H006_CAMC5           | . . . . . K . NSF          | CSFFSRMRRG | LY   | . TY | ALNG  | GYNKIAIAHHL | DDAAES | FF     | MNFI  | YNGAL  | LRSLAPKY |       |
| tr U2F8G7 U2F8G7_9PROT           | . . . . . K . NSF          | CSFFSRMRRG | LY   | . TY | ALKH  | GYNKIAIAHHL | DDAAES | FF     | MNFI  | YNGAL  | LRSLAPKY |       |
| tr E7G3J2 E7G3J2_9HELI           | . . . . . E . QSY          | CSFCSRMRRG | LY   | . NY | ALEH  | GYNKIALAHHL | DDAVES | FF     | MNFI  | YNGS   | LRSMPPY  |       |
| tr H5VC43 H5VC43_HELBI           | . . . . . E . KSY          | CSFCSRMRRG | LY   | . NY | ALEH  | GYNKIAIAHHL | DDAVES | FF     | MNFI  | YNGS   | LRSMPPY  |       |
| tr A0A268U060 A0A268U060_9HELI   | . . . . . E . NSIY         | CSFCSRMRRG | LY   | . SY | ALKN  | GYNKIALGHHL | DDACES | FF     | MNLT  | YNGAL  | LRSMPPY  |       |
| tr A0A087M8T0 A0A087M8T0_9PROT   | . . . . . E . NSF          | CSFFSRMRRG | LY   | . TY | ALEH  | GYNKIALAHHL | DDAVES | FF     | MNFI  | YNGAL  | LRSMPPY  |       |
| tr A0A2A2GQP1 A0A2A2GQP1_9HELI   | . . . . . E . GSVY         | CSFCSRMRRG | LY   | . TK | ALEG  | GYNKIALAHHL | DDAAES | FF     | MNLT  | YNGAL  | LRSMPPKY |       |
| tr A0A2A6W9V1 A0A2A6W9V1_HELPX   | . . . . . E . KSF          | CSFCSRLRGT | LY   | . SK | ALEE  | GYNKVAIAHHL | DDAVES | FF     | MNFI  | YNGS   | LRSMPPY  |       |
| tr A0A0C2Z9Q1 A0A0C2Z9Q1_9PROT   | . . . . . E . NSF          | CSYFSRMRRG | LY   | . NF | ASEN  | GYNKVALGHHH | DDAIES | FF     | MNMFY | NGAM   | RSMPPIY  |       |
| tr B9CYD9 B9CYD9_CAMRE           | . . . . . K . NSF          | CSFFSRMRRG | LY   | . TY | ALEH  | GYNKIAIAHHL | DDAVES | FF     | MNFI  | YNGAL  | LRSLAPKY |       |
| tr A0A2N1J2R6 A0A2N1J2R6_9PROT   | . . . . . K . NSF          | CSFFSRMRRG | LY   | . TT | AQEQ  | GYNKIALGHHL | DDAMES | FF     | MNFI  | YNGAL  | LRSMPPY  |       |
| tr A0A0K2XDX1 A0A0K2XDX1_9HELI   | . . . . . E . QSY          | CSFCSRMRRG | LY   | . NH | ALEN  | GYNKIAIAHHL | DDAVES | FF     | MNFI  | YNGS   | LRSMPPY  |       |
| tr A0A1I5SJS5 A0A1I5SJS5_9PROT   | . . . . . E . NSF          | CSYFSRMRRG | LY   | . TK | AQEG  | GYNKVALGHHL | DDAAES | FF     | MNMLY | NGT    | LRSMAPIY |       |
| tr A0A1B3XCA3 A0A1B3XCA3_CAMCO   | . . . . . E . NSF          | CSYFSRMRRG | LY   | . TY | ALEK  | GYNKIAIAHHL | DDAAES | FF     | MNFI  | YNGAL  | LRSLAPIY |       |
| tr A0A1B9FAV1 A0A1B9FAV1_9PROT   | . . . . . K . NSF          | CSYFSRMRRG | LY   | . TY | ALEK  | GYNKIAIAHHL | DDAAES | FF     | MNFI  | YNGS   | LRSMPPY  |       |
| tr A0A2X4PH55 A0A2X4PH55_HELMT   | . . . . . E . GSY          | CSFCSRMRRG | LY   | . NK | AKEL  | GYNKVAIAHHL | DDAAES | FF     | MNLT  | YNGS   | LRSMPPY  |       |
| tr T1D2B1 T1D2B1_9HELI           | . . . . . D . GTIY         | CSFCSRMRRG | LY   | . SQ | ALEG  | GYNKIALAHHL | DDATES | FF     | MNLT  | YNGS   | LRSMPPY  |       |
| tr A0A1Y5DTG6 A0A1Y5DTG6_9PROT   | . . . . . K . NSF          | CSFFSRMRRG | LY   | . ST | AQEQ  | GYNKIALGHHL | DDAIES | FF     | MNFI  | YNGAL  | LRSMPPKY |       |
| tr A0A1W1CJN1 A0A1W1CJN1_9ZZZZ   | . . . . . K . NSY          | CSFFSRMRRG | LY   | . SV | AKEH  | CYNKVALGHHM | DDAAES | FF     | MNFI  | YNGQ   | MRSLAPKY |       |
| tr A0A1W1CXB3 A0A1W1CXB3_9ZZZZ   | . . . . . K . NSF          | CSFFSRMRRG | LY   | . SV | AKEH  | CYNKVALGHHM | DDAAES | FF     | MNFI  | YNGQ   | MRSLAPKY |       |
| tr A0A0A8GW05 A0A0A8GW05_9PROT   | . . . . . R . NSF          | CSFFSRMRRG | LY   | . TY | ALEN  | GYNKIAIAHHL | DDAAES | FF     | MNFI  | YNGAL  | LRSLAPKY |       |
| tr A0A0A8H088 A0A0A8H088_9PROT   | . . . . . K . NSF          | CSYFSRMRRG | LY   | . TY | ALDQ  | GYNKIAIAHHL | DDAVES | FF     | MNFI  | YNGS   | LRSLAPKY |       |
| tr A0A1W1WUK6 A0A1W1WUK6_9PROT   | . . . . . Q . NSY          | CSFFSRMRRG | LY   | . TY | ALQN  | GYNKVALGHHL | DDAIES | FF     | MNMFY | NGT    | MRSMPPY  |       |
| tr A0A076FD18 A0A076FD18_9PROT   | . . . . . K . NSF          | CSFFSRMRRG | LY   | . TY | ALEH  | GYNKIAIAHHL | DDAAES | FF     | MNFI  | YNGAL  | LRSLAPKY |       |
| tr A0A2G1YNP8 A0A2G1YNP8_9HELI   | . . . . . K . NSF          | CSFFSRMRRG | LY   | . GI | AEKH  | CNKLSLGHM   | DDAAES | FF     | MNFI  | YNGQ   | MRSLAPKY |       |
| tr A0A071LP71 A0A071LP71_9PROT   | . . . . . K . NSF          | CSFFSRMRRG | LY   | . TY | AQKH  | GYNKIAIAHHL | DDAAES | FF     | MNFI  | YNGAL  | LRSLAPKY |       |
| tr A0A1W1BTA3 A0A1W1BTA3_9ZZZZ   | . . . . . K . NSY          | CSFFSRMRRG | LY   | . SA | AKFE  | CYNKVALGHHL | DDAAES | FF     | MNFI  | YNGQ   | LRSLAPIY |       |
| tr A6Q4A8 A6Q4A8_NITSB           | . . . . . T . NSY          | CSFFSRMRRG | LY   | . TY | ALQN  | GYNKIALGHHL | DDAIES | FF     | MNMFY | NGAM   | RSMPPIY  |       |
| tr A0A0C2ZLF5 A0A0C2ZLF5_9PROT   | . . . . . E . NSF          | CSYFSRMRRG | LY   | . SY | AQEH  | GYNKIALGHHF | DDAVES | FF     |       |        |          |       |

tr|E4U1K2|E4U1K2\_SULKY . . . . . Q. NS SF. CSFFSRMRRCALY. SAAKEY G CNKVALGHHLLDDAAESFFMNLIIYNGHMRALAPKPY

tr|A0A2N6GCJ3|A0A2N6GCJ3\_9HELI . . . . . K. NS SF. CSFFSRMRRCGLY. SAAQAH G CNKVALGHHMDDAAESFFMNFIIYNGQLRSLAPKY

tr|A0A2D3W7B7|A0A2D3W7B7\_9PROT . . . . . K. NS SF. CSFFSRMRRCALY. TYALENGYKKNLALAHHLDDAAESFFMNFMYNGAIRSMPPIY

tr|A0A1W1D2X7|A0A1W1D2X7\_9ZZZZ . . . . . K. NS SS. CSFFSRMRRCGLY. SVAKEHNCNKVALGHHMDDAVESFFMNFYNGQLRSLAPKY

tr|A0A2G2ANT9|A0A2G2ANT9\_9HELI . . . . . K. NS SF. CSFFSRMRRCGLY. SAALDNG CNKVALGHHLLDDACESFFMNFIIYNGQMRSLAPY

tr|A0A091AJ11|A0A091AJ11\_9HELI . . . . . Q. NS SF. CSFFSRMRRCGLY. TAAQQFG CNKVALGHHLLDDAAESFFMNLIIYNGHLSRLAPKY

tr|A0A1B8J7N9|A0A1B8J7N9\_9HELI . . . . . E. GTIY. CSFCSRMRRCGLY. SEALKG G CNKVALGHHMDDITESFFMNLIIYNGSLRSMPIY

tr|A0A0B0Q4K1|A0A0B0Q4K1\_9PROT . . . . . S. NS SF. CSFFSRMRRCGLY. TYALNHGYAKLALAHHLDDAAESFFMNFSYNGALRSMPPIY

tr|T0JF06|T0JF06\_9HELI . . . . . K. NS SF. CSFFSRMRRCGLY. GVAEKY G CNKVALGHHMDDAAESFFMNFIIYNGQMRSLAPKY

tr|A0A1J5FJW1|A0A1J5FJW1\_9HELI . . . . . K. NS SF. CSFFSRMRRCGLY. TAAFDHG CNKVALGHHMDDAAESFFMNFIIYNGQMRSLAPKY

tr|A0A2N6G706|A0A2N6G706\_9PROT . . . . . K. NS SF. CSFFSRMRRCGLY. STAEQGYCNKVALGHHLLDDAMESFFMNFYNGALRSMPPIY

tr|A0A2G2HJK9|A0A2G2HJK9\_9PROT . . . . . K. NS SF. CSFFSRMRRCGLY. SAALDQGYCNKVALGHHLLDDAMESFFMNFYSGALRSMPPIY

tr|A0A1W9PM77|A0A1W9PM77\_9HELI . . . . . K. NS SY. CSFFSRMRRCGLY. SAAKKYECNKVALGHHLLDDAAESFFMNLIIYNGQMRSLAPKY

tr|A0A2G6DDV7|A0A2G6DDV7\_9PROT . . . . . K. NS SF. CSFFSRMRRCGLY. TYALENDYKNVAIAHHLDDAAESFFMNFIIYNGALRSAPKY

tr|A0A1J4TTL2|A0A1J4TTL2\_9HELI . . . . . K. NS SF. CSFFSRMRRCGLY. GLAEKLG CNKVALGHHLLDDAVESFFMNFIIYNGQMRSLAPKY

tr|A0A2P8QZA9|A0A2P8QZA9\_9PROT . . . . . K. NT SI. CSFCSRMRRCGLY. TYALENG CNKVALGHHLLDDAAESFFMNFTHNGSLRSLAPKY

tr|E0UQV7|E0UQV7\_SULAO . . . . . K. NS SF. CSFFSRMRRCGLY. SVAKELG CNKVALGHHMDDAAESFFMNFIIYNGQMRSLAPKY

tr|C8FEU9|C8FEU9\_9PROT . . . . . A. NTTF. CSFCSRMRRCGLY. SYALEHGFNKIAIAHHLDDAAESFFMNFTHNGALRTAPKY

tr|Q7MR20|Q7MR20\_WOLSU . . . . . E. NS SY. CSFCSRMRRCGLY. SKALEG G CNKVALGHHLLDDAAESFFMNFSYNGAIRSMPPIY

tr|A0A1X9STM1|A0A1X9STM1\_9PROT . . . . . K. NS SF. CSFFSRMRRCGLY. TYALANG CNKVALGHHLLDDAVESFFMNFIIYNGAIRSLAPKY

tr|A0A128E9T0|A0A128E9T0\_9PROT . . . . . E. NTTF. CSFCSRMRRCGLY. SYALENGFNKIAIAHHLDDAAESFFMNFTHNGALRTAPKY

tr|J0LAR5|J0LAR5\_9HELI . . . . . E. NS SY. CSFFSRMRRCGLY. SATEKLG CNKVALGHHLLDDAVESFFMNFYNGSLRSLAPKY

tr|A0A1T2XPE8|A0A1T2XPE8\_9PROT . . . . . Q. NS SF. CSFFSRMRRCGLY. TYALNNF NKLAIAHHLDDAAESFFMNFYNGALRTAPKY

tr|A0A1V4R692|A0A1V4R692\_9PROT . . . . . K. NS SF. CSFFSRMRRCGLY. SYALKHNFNKIALGHHLLDDAVESFFMNFYNGALRTAPKY

tr|A0A0E9F2V9|A0A0E9F2V9\_CHLTH . . . . . Q. NATI. CSFCARLRRCGLY. TYALKNG CNKVALGHHLLDDAVESFFMNFYNGALRTAPKY

tr|A0A258ZKP3|A0A258ZKP3\_9HELI . . . . . K. NS SF. CSFFSRMRRCGLY. SAALEHG CNKVALGHHLLDDAAESFFMNFIIYNGHMRALAPKY

tr|A0A2G2G5A2|A0A2G2G5A2\_9PROT . . . . . K. NS SF. CSFFSRMRRCGLY. SVAEELG CNKVALGHHLLDDAAESFFMNFIIYNGQMRSLAPY

tr|A0A1G3UGJ6|A0A1G3UGJ6\_9HELI . . . . . K. NS SF. CSFFSRMRRCGLY. SAAEKY G CNKVALGHHMDDACESFFMNFIIYNGQMRSLAPKY

tr|A0A1G3TFQ9|A0A1G3TFQ9\_9HELI . . . . . K. NS SF. CSFFSRMRRCGLY. SVAEKYG CNKVALGHHMDDAAESFFMNFIIYNGQMRSLAPKY

tr|A71189|A71189\_CAMHC . . . . . P. NTTF. CSFCSRMRRCGLY. SYALKNGFNKLAIAHHLDDAAESFFMNLIIYNGALRTAPKY

tr|A0A0C2V6R9|A0A0C2V6R9\_9HELI . . . . . Q. NS SY. CSFFSRMRRCGLY. SAAOHFG CNKVALGHHMDDAVESFFMNFIIYNGALRTAPY

tr|A0A2G2PC84|A0A2G2PC84\_9HELI . . . . . K. NS SF. CSFFSRMRRCGLY. SVAEELG CNKVALGHHLLDDAVESFFMNFIIYNGQMRSLAPY

tr|G4E699|G4E699\_9GAMM . . . . . D. ND SF. CAFCSRMRRCGLY. RTAREHG YQVLAHQHLLDDLAESFFMSAFHGRQLTMKAY

tr|A0A067A0H6|A0A067A0H6\_HYDMR . . . . . K. GN SF. CSFCARQKRCGLY. TVCRREGYNVLAHQHLLDDLAESFFMSAFHGRQLTMKAY

tr|Q31J95|Q31J95\_HYDCU . . . . . K. GD SF. CSFCARHRCRCGLY. TVCRREGYNVLAHQHLLDDLAESFFMSAFHGRQLTMKAY

tr|A0A1A6C120|A0A1A6C120\_9GAMM . . . . . D. ND SF. CAFCARMKRCGLY. SAARREGYNVLAHQHLLDDLAESFFMSAFHGRQLTMKAY

tr|A0A257NW40|A0A257NW40\_9GAMM . . . . . R. GD SY. CAFCARMKRCGLY. KAARREGYTVLALGQHLLDDLAESFFMSAFHGRQLTMKAY

tr|A0A2H6G4E2|A0A2H6G4E2\_9BACT . . . . . R. RD SF. CAYCSRMRRCGLY. STARKN CNKVLVAHQHLLDDLAESFFMSAFHGRQLTMKAY

tr|A0A0X3T6D5|A0A0X3T6D5\_9GAMM . . . . . K. GN SF. CSFCARQKRCGLY. TVCRREGYNVLAHQHLLDDLAESFFMSAFHGRQLTMKAY

tr|A0A1T4X6M8|A0A1T4X6M8\_9GAMM . . . . . D. NN SY. CAFCSRMRRCGLY. KTAREQGYNVLAHQHLLDDLAESFFMSAFHGRQLTMKAY

tr|A0A2I1DYG6|A0A2I1DYG6\_9PROT . . . . . L. RP SY. CSFCARMKRCGLY. RCARREGYNVLAHQHLLDDLAESFFMSAFHGRQLTMKAY

tr|F9ZRE2|F9ZRE2\_ACICS . . . . . G. RP SY. CSFCARMKRCGLY. ACARREGYNVLAHQHLLDDLAESFFMSAFHGRQLTMKAY

| tr|A0A1F6G6B2|A0A1F6G6B2\_9PROT | . . . . . R. GD SF. | CAYCSRMRRCGLY. | ATAREQGYNVLAHQHLLDDLAESFFMSAFHGRQLTMKAY |
| tr|A0A1Z5HNK0|A0A1Z5HNK0\_9THEO | . . . . . N. N. . . . . | CSICAHLRRCGLY. | DYAVKDYCNKVALAHYDDAVETFLMSQLYGSLRTPSKT |
| tr|R5AS17|R5AS17\_9FIRM | . . . . . I. EQ SP. | CYLCAARMRCGLY. | SKARELG CNKIALGHHFDDVETVGMGFYGSQLOQAMPKKL |
| tr|A0A2G3E2W8|A0A2G3E2W8\_9FIRM | . . . . . I. KD NP. | CYLCAARMRCGLY. | AKARELG CNKIALGHHFDDVETIVMGMLYGAQIQTMPPKL |
| tr|A0A1I2CQA3|A0A1I2CQA3\_9FIRM | . . . . . E. QN PP. | CYLCAARMRCGLY. | RYAQEAG CNKIALGHHFDDVETIVMSMFGYGEIRTMPPKV |
| tr|R9KLC2|R9KLC2\_9FIRM | . . . . . I. EK SP. | CYLCAARMRCGLY. | HQAGKLG CNKIALGHHFDDVETIVMGMLYGGQIQTMPPKL |
| tr|A0A174X0A0|A0A174X0A0\_9CLOT | . . . . . V. DE SP. | CYLCAARMRCGLY. | AHAKELG CNKIALGHHFDDVETIVLMSMLYGSQVQTMPPKL |
| tr|A0A0D0QQ0Q|A0A0D0QQ0Q\_9FIRM | . . . . . I. EK SP. | CYVCAARMRCGLY. | SEAKRLG CNKIALGHHYDDVETIVLMSMLYGAQIQTMPPKL |
| tr|A0A174KCC2|A0A174KCC2\_CLOSY | . . . . . V. DQ SP. | CYLCAARMRCGLY. | ANAKKLG CNKIALGHHFDDVETIVLMSMLYGAQVNTMPPKL |
| tr|R9L8Q4|R9L8Q4\_9FIRM | . . . . . I. EN SP. | CYLCAARMRCGLY. | SKAHALG CNKIALGHHFDDVETIVLMSMLYGGVQTMPPKL |
| tr|A0A1H5TPC7|A0A1H5TPC7\_9FIRM | . . . . . I. TG SP. | CYLCAARMRCGLY. | SKAKELG CNKIALGHHYDDVETIVLMSMLYGGQIQTMPPKL |
| tr|A0A1G6DDH6|A0A1G6DDH6\_9FIRM | . . . . . I. EQ NP. | CYLCAARMRCGLY. | KTAKDMG CNKIALGHHFDDVETIVLMSMLYGSQVQTMPPKL |
| tr|A0A1G9SUV6|A0A1G9SUV6\_9FIRM | . . . . . I. VE SP. | CYLCAARMRCGLY. | SKAKELG CNKIALGHHFDDVETIVLMSMLYGSQVQTMPPKL |
| tr|R6C5Q7|R6C5Q7\_9FIRM | . . . . . L. DK NP. | CYMCARMRCGLY. | SYAQSLG CNKIALGHHFDDVETIVLMSMLYGGQIQTMPPKL |
| tr|R5WT82|R5WT82\_9FIRM | . . . . . E. ES SP. | CYLCAARMRCGLY. | SKARELG CNKIALGHHYDDVETIVLMSMLYGAQIQTMPPKL |
| tr|A0A1Q6RFH7|A0A1Q6RFH7\_9FIRM | . . . . . V. EK NP. | CYLCAARMRCGLY. | AKAQDLG CNKIALGHHFDDVETIVMGFLFYGSQLOQAMPKKL |
| tr|W0U949|W0U949\_9FIRM | . . . . . T. KR NP. | CYLCAARMRCGLY. | KFAQDLG CNKIALGHHFDDVETIVMSMFGYGSQIQTMPPKL |
| tr|A0A143Y538|A0A143Y538\_9LACT | . . . . . E. EV SP. | CYKCAARMRCGLY. | KNAQDLG CNKIALGHHFDDVETIVLNMNMYGSQIETMPPKL |
| tr|A0A1I5VEX7|A0A1I5VEX7\_9FIRM | . . . . . V. EK NP. | CYLCAARMRCGLY. | SKAQALG CNKIALGHHFDDVETIVLGLFYGAQLOQAMPKKL |
| tr|A0A1K1PC37|A0A1K1PC37\_9FIRM | . . . . . I. EM NP. | CYLCAARMRCGLY. | KTAKDMG CNKIALGHHFDDVETIVLMSMLYGSQVQTMPPKL |
| tr|A0A1G5I8B0|A0A1G5I8B0\_9FIRM | . . . . . L. DK NP. | CYICARMRCGLY. | SNAKALG CNKIALGHHYDDVETIVLMSMLYGAQIQTMPPKL |
| tr|A0A2W7JTA9|A0A2W7JTA9\_9BACT | . . . . . V. VK SP. | CYVCAARMRCGLY. | HMAKDMG CNKIALGHHMDDVETIVMAMFYGAQLOQAMPKKL |
| tr|A0A1G9E946|A0A1G9E946\_9CLOT | . . . . . I. EK SP. | CYLCAARMRCGLY. | RFAREHG CNKIALGHHFDDVETIVLMSMLYGSQYQAMLPKL |
| tr|A0A2M9A852|A0A2M9A852\_9BACT | . . . . . V. EH SP. | CYVCAARMRCGLY. | SOAKRLG CNKIALGHHFDDVETIVMSMFGYASQLOQAMPKL |
| tr|E6UAU2|E6UAU2\_RUMA7 | . . . . . V. DE HP. | CYLCAARMRCGLY. | KTAKELG CNKIALGHHFDDVETIVLMSMLYGSQVQTMPPKL |
| tr|G5HHM3|G5HHM3\_9FIRM | . . . . . V. DQ SP. | CYLCAARMRCGLY. | SHARELG CNKIALGHHFDDVETIVLMSMLYGGQIQTMPPKL |
| tr|A0A1D3TNX5|A0A1D3TNX5\_9FIRM | . . . . . I. DK SP. | CYLCAARMRCGLY. | KHAQDLG CNKIALGHHFDDVETIVLNMNLYSGRIETMPPKL |
| tr|A0A2P6URX3|A0A2P6URX3\_9BACT | . . . . . M. EH SP. | CYICARMRCGLY. | NKAKELG CNKIALGHHFDDVETIVMSMFGYASQLOQAMPKL |
| tr|A0A1M6RMG6|A0A1M6RMG6\_9BACT | . . . . . T. EH SP. | CYLCAARMRCGLY. | AKARELG CNKIALGHHFDDVETIVMSMFGYASQLOQAMPKL |
| tr|A0A1C6I2U3|A0A1C6I2U3\_9FIRM | . . . . . V. EK NP. | CYLCAARMRCGLY. | SKAQELG CNKIALGHHLLDVLETLGLFYGAQLOQAMPKL |
| tr|R9LUH7|R9LUH7\_9FIRM | . . . . . V. EK NP. | CYLCAARMRCGLY. | AQAKLG CNKIALGHHFDDVETIVLGLFYGAQLOQAMPKL |
| tr|J1H3X4|J1H3X4\_9CLOT | . . . . . S. GG NP. | CYLCAARMRCGLY. | AKARELG CNKIALAHHFDDVETIVMSMLYGAQIETMPPKL |
| tr|A0A176U8C8|A0A176U8C8\_9FIRM | . . . . . T. DK SP. | CYLCAARMRCGLY. | NKAKELG CNKIALGHHFDDVETIVLIGMFYASQLOQAMPKL |
| tr|A0A1Q6KUQ8|A0A1Q6KUQ8\_9FIRM | . . . . . V. DK SP. | CYLCAARMRCGLY. | SKARELG CNKIALGHHFDDVETIVLIGMFYASQLOQAMPKL |
| tr|R5ALL4|R5ALL4\_9CLOT | . . . . . R. GQ SP. | CYLCAARMRCGLY. | HAAQERG CNKIALGHHFDDVETIVMGMLYGSQLOQAMPKL |
| tr|A0A1Y4RIL6|A0A1Y4RIL6\_9FIRM | . . . . . V. ED NP. | CYLCAARMRCGLY. | ANAKRLG CNKIALGHHFDDVETIVMGMLYGSQLOQAMPKL |
| tr|E9SA84|E9SA84\_RUMAL | . . . . . V. RN NP. | CYLCAARMRCGLY. | KNAQELG CNKIALGHHFDDVETIVLMSMLYGSQVQTMPPKL |
| tr|R7IB10|R7IB10\_9FIRM | . . . . . A. ER NP. | CYLCAARMRCGLY. | DRAQEMG CNKIALGHHFDDVETIVMSMFGYGAQLOQAMPKL |
| tr|A0A2A7B516|A0A2A7B516\_9FIRM | . . . . . T. DK NP. | CYLCAARMRCGLY. | SKARELG CNKIALGHHFDDVETIVMSMFGYGSQLOQAMPKL |
| tr|A0A1Q6SWI6|A0A1Q6SWI6\_9FIRM | . . . . . S. DK SP. | CYLCAARMRCGLY. | KKAQELG CNKIALGHHFDDVETIVMSMFGYGSQLOQAMPKL |
| tr|R6ZNC4|R6ZNC4\_9CLOT | . . . . . V. DQ SP. | CYLCAARMRCGLY. | ANAKRLG CNKIALGHHFDDVETIVMSMFGYGAQVNTMPPKL |
| tr|COCTY6|COCTY6\_9FIRM | . . . . . V. DQ SP. | CYLCAARMRCGLY. | DRARSLG CNKIALGHHYDDVETIVLMSMLYGSQVNTMPPKL |
| tr|E2NTX2|E2NTX2\_CATMR | . . . . . I. EK NP. | CYLCAARMRCGLY. | NRAQELG CNKIALGHHYDDVETIVLMSMLYGAQIQTMPPKL |
| tr|A0A212JBS4|A0A212JBS4\_9FIRM | . . . . . T. DQ SP. | CYLCAARMRCGLY. | SKARELG CNKIALGHHFDDVETIVLMSMLYGSQLOQAMPKL |
| tr|A0A1C5XK44|A0A1C5XK44\_9CLOT | . . . . . S. EK NP. | CYLCAARMRCGLY. | SKAQELG CNKIALGHHFDDVETIVMSMFGYGAQLOQAMPKL |
| tr|A0A1M2Z8D3|A0A1M2Z8D3\_9FIRM | . . . . . T. DK SP. | CYLCAARMRCGLY. | HQAQKRG CNKIALGHHFDDVETIVLMSMLYGAQIQAMPKL |
| tr|A0A1H2SZG7|A0A1H2SZG7\_9FIRM | . . . . . A. FK QP. | CYFCARMRCGLY. | KHAQSI G CNKIALGHHFDDVETIVLMSMFGYSEIRTMPPKL |
| tr|A9KRA1|A9KRA1\_LACP7 | . . . . . V. DE SP. | CYLCAARMRCGLY. | KNAKAHG CNKIALGHHFDDVETIVLMSMLYGSQIQTMPPKL |
| tr|A0A2J8B726|A0A2J8B726\_9FIRM | . . . . . L. SS NP. | CYLCAARMRCGLY. | RMARELG CNKIALGHHMDDVETIVMAMFYGAQLOQAMPKL |
| tr|A0A252CN16|A0A252CN16\_9FIRM | . . . . . V. DS SP. | CYHCAARMRCGLY. | QKAQELG CNKIALGHHFDDVETIVLNMNMYSGTETMPPKL |
| tr|A0A1I5J0S5|A0A1I5J0S5\_9FIRM | . . . . . V. DD SP. | CYLCAARMRCGLY. | KNAQALG CNKIALGHHFDDVETIVLMSMLYGSQVKGMMPPKL |
| tr|A0A2N3RZR2|A0A2N3RZR2\_9BACT | . . . . . T. EK SP. | CYLCAARMRCGLY. | RMAMDA G CNKIALGHHFDDVETIVLMSMLYGSQLOQAMPKL |
| tr|R9IVG3|R9IVG3\_9FIRM | . . . . . I. EK SP. | CYLCAARMRCGLY. | HQARELG CNKIALGHHYDDVETIVLMSMLYGGQIQTMPPKL |
| tr|EORWJ2|EORWJ2\_BUTPB | . . . . . V. GG SP. | CYLCAARMRCGLY. | SKAQELG CNKIALGHHFDDVETIVMAMFYGGQIQTMPPKL |
| tr|A0A1M6RWL0|A0A1M6RWL0\_9BACT | . . . . . T. ER SP. | CYVCAARMRCGLY. | HKAQDLG CNKIALGHHLLDVLETVMAMFYGSQLOQAMPKL |
| tr|A0A2U1BER2|A0A2U1BER2\_9FIRM | . . . . . S. EK NP. | CYLCAARMRCGLY. | SKAQELG CNKIALGHHFDDVETIVMSMFGYGSQLOQAMPKL |
| tr|A0A1Y4IPQ2|A0A1Y4IPQ2\_9FIRM | . . . . . I. KE NP. | CYLCAARMRCGLY. | AHARELG CNKIALGHHFDDVETIVLMSMLYGGQIQTMPPKL |
| tr|A0A2P8EHL9|A0A2P8EHL9\_9FUSO | . . . . . A. TE HP. | CYLCAARMRCGLY. | KKARELG CNKIALGHHLLDVLETVMAMFYGSQLOQAMPKL |
| tr|A0A2V2F820|A0A2V2F820\_9FIRM | . . . . . T. DK SP. | CYLCAARMRCGLY. | AKARELG CNKIALGHHFDDVETIVMGFLFYGSQLOQAMPKL |
| tr|R7FQ76|R7FQ76\_9CLOT | . . . . . D. KS SP. | CYLCAARMRCGLY. | AFAREMG CNKIALGHHYDDVETIVLNMNLYGSQLOQAMPKL |
| tr|A0A1F2PGJ4|A0A1F2PGJ4\_9FIRM | . . . . . I. DR SP. | CYLCAARMRCGLY. | HHAKELG CNKIALGHHYDDVETIVLMSMLYGGQIQTMPPKL |



|                                |                                   |             |                 |            |        |         |        |        |        |            |
|--------------------------------|-----------------------------------|-------------|-----------------|------------|--------|---------|--------|--------|--------|------------|
| tr R5SYF5 R5SYF5_9CLOT         | . . . . . E . KGSP                | CYLCARMRRG  | GLY . NKAREL    | CNKIALGHHF | DDVIET | TL      | LSMIY  | GAET   | IKTMM  | PKL        |
| tr H1HWV0 H1HWV0_9FIRM         | . . . . . A . DEHP                | CYLCARMRRG  | GLY . RKAKDL    | CNKIALGHHF | NDVIET | TV      | MAMFY  | SSQ    | LQGM   | PKL        |
| tr A0A1M6GGJ6 A0A1M6GGJ6_9FIRM | . . . . . I . EKSP                | CYLCARMRRG  | GLY . KNAQDL    | CNKIALGHHY | DDVIET | IL      | MGMMY  | GAQ    | IQTM   | PKL        |
| tr R5LED2 R5LED2_9CLOT         | . . . . . I . DDHP                | CYLCARMRRG  | GLY . RKAKEL    | CNKIALGHHF | DDVDET | IL      | MGMLY  | GAQ    | QTM    | PKL        |
| tr R6UGA7 R6UGA7_9CLOT         | . . . . . I . DDHP                | CYLCARMRRG  | GLY . QKAKEL    | CNKIALGHHF | DDVDET | IL      | MGMLY  | GAQ    | QTM    | PKL        |
| tr G51LG4 G51LG4_9CLOT         | . . . . . V . DESP                | CYLCARMRRG  | GLY . AKAKEL    | CNKIALGHHF | DDVIET | IL      | MSMLY  | GAQ    | VNTMM  | PKL        |
| tr A0A0X1U6S1 A0A0X1U6S1_CLOPR | . . . . . S . BEEP                | CYLCARMRRG  | GLY . NKAKLL    | CNKIALGHHF | NDVIET | TV      | MGMFY  | GSQ    | LQAM   | PKL        |
| tr R6S5S7 R6S5S7_9CLOT         | . . . . . V . EDSP                | CYLCARMRRG  | GLY . ANAREL    | CNKIALGHHF | DDVIET | IL      | MSMLY  | GAQ    | INTMM  | PKL        |
| tr A0A1H0AG65 A0A1H0AG65_9FIRM | . . . . . T . DRSP                | CYLCARMRRG  | GLY . SKAQEL    | CNKIALGHHF | DDVDET | IL      | MSMLY  | GSE    | MRTMM  | PKL        |
| tr A0A1Q6M5X6 A0A1Q6M5X6_9CLOT | . . . . . Q . EKNP                | CYLCARMRRG  | GLY . RIAKEL    | CNKIALGHHY | DDVIET | IL      | MNMLN  | AGS    | FQTM   | PKL        |
| tr R7H4I7 R7H4I7_9FIRM         | . . . . . I . DDSP                | CYLCARMRRG  | GLY . NHAQSL    | CNKIALGHHF | DDVIET | IL      | MGMLY  | GAQ    | VQTM   | PKL        |
| tr A0A0V8QHD3 A0A0V8QHD3_9FIRM | . . . . . I . EDNP                | CYLCARMRRG  | GLY . KEAQSL    | CNKIALGHHF | DDVIET | IL      | MGMLY  | GQF    | QTM    | PKL        |
| tr A0A1H8ZVY3 A0A1H8ZVY3_9FIRM | . . . . . I . TKSP                | CYLCARMRRG  | GLY . SKAKEL    | CNKIALGHHY | DDVIET | IL      | MGLMHA | QAQ    | IQTM   | PKL        |
| tr A0A1M4WL46 A0A1M4WL46_9FIRM | . . . . . T . EQSP                | CYLCARMRRG  | GLY . SKAKEL    | CNKIALGHHF | DDVIET | TL      | MSMLY  | SAE    | IKTMM  | PKL        |
| tr F2JRP1 F2JRP1_CELLD         | . . . . . V . EDTP                | CYLCARMRRG  | GLY . KEAKDL    | CNKIALGHHF | DDVIET | IL      | MSMLY  | GSQ    | IKTMM  | PKL        |
| tr R5MTR7 R5MTR7_9MOLU         | . . . . . D . SKSP                | CYLCARMRRG  | GLY . NKAKEL    | CNKIALGHHF | DDVIET | TL      | LSMFY  | GSE    | VKTMM  | PKL        |
| tr A0A1M7F7H6 A0A1M7F7H6_9FIRM | . . . . . I . DKSP                | CYLCARMRRG  | GLY . AKAKEL    | CNKIALGHHM | SDVIET | TL      | MGMLY  | GSQ    | IQGM   | PKL        |
| tr S0JHW1 S0JHW1_9FIRM         | . . . . . I . EKSP                | CYLCARMRRG  | GLY . HQAREL    | CNKIALGHHY | DDVIET | IL      | MGMLY  | GQI    | IQTM   | PKL        |
| tr A0A1M5TU90 A0A1M5TU90_9FIRM | . . . . . T . DRSP                | CYLCARMRRG  | GLY . SKAREL    | CNKIALGHHF | DDVIET | IL      | MSMLY  | GAE    | VKTMM  | PKL        |
| tr M2Q1G3 M2Q1G3_9FIRM         | . . . . . D . FKNP                | CYFCARMRRG  | GLY . KQAQSL    | CNKIALGHHF | DDVIET | TL      | LSMFY  | GSE    | IKTMM  | PKL        |
| tr R6Y2Q3 R6Y2Q3_9FIRM         | . . . . . D . DKSP                | CYFCARMRRG  | GLY . NFAKKM    | CNKIALGHHY | DDVIET | TL      | MNMLN  | AGS    | FQTM   | PKL        |
| tr A0A2T3FK21 A0A2T3FK21_9FIRM | . . . . . I . EKSP                | CYLCARMRRG  | GLY . AKAKEL    | CNKIALGHHY | DDVIET | IL      | MGMLY  | GAQ    | IQTM   | PKL        |
| tr V2Y991 V2Y991_9FIRM         | . . . . . I . EKSP                | CYLCARMRRG  | GLY . SKAKEL    | CNKIALGHHF | DDAIET | VL      | MGMFY  | AGK    | YETMM  | PKL        |
| tr G4KRV5 G4KRV5_OSCVS         | . . . . . A . DKNP                | CYLCARMRRG  | GLY . AKAQEL    | CNKIALGHHF | SDVIET | TL      | MALLY  | GAQ    | LQAM   | PKL        |
| tr R5XBM2 R5XBM2_9FIRM         | . . . . . A . GDSF                | CYLCARMRRG  | GLY . SKAKEL    | CNKIALGHHF | DDVDET | TL      | MGMY   | GAQ    | IQAM   | PKL        |
| tr R7I6Y9 R7I6Y9_9CLOT         | . . . . . V . EGNP                | CYLCARMRRG  | GLY . KNAQKL    | CNKIALGHHF | DDVIET | IL      | MGMMY  | GQI    | IQTM   | PKL        |
| tr E7GBG2 E7GBG2_9FIRM         | . . . . . I . EKSP                | CYLCARMRRG  | GLY . AKAKEL    | CNKIALGHHY | DDVDET | IL      | MGMFY  | GSQ    | IQTM   | PKL        |
| tr A0A1Y4SGW6 A0A1Y4SGW6_9FIRM | . . . . . I . EKSP                | CYLCARMRRG  | GLY . AKAKEL    | CNKIALGHHF | DDVIET | IL      | MGMFY  | GSQ    | IQTM   | PKL        |
| tr R6MCT4 R6MCT4_9CLOT         | . . . . . S . FDSF                | CYMCARMRRG  | GLY . NKAKEL    | CNKIALGHHF | NDVIET | TL      | LSMFY  | GSE    | VKTMM  | PKL        |
| tr A0A2K2TPX0 A0A2K2TPX0_9CLOT | . . . . . V . DESP                | CYLCARMRRG  | GLY . ANAKEL    | CNKIALGHHF | DDVIET | IL      | MSMLY  | GAQ    | VNTMM  | PKL        |
| tr A0A2G3Q0C6 A0A2G3Q0C6_9FIRM | . . . . . V . EETP                | CYLCARMRRG  | GLY . KEAQAL    | CNKIALGHHF | DDVIET | IL      | MGMLY  | GAQ    | IQTM   | PKL        |
| tr A0A1V5S3T7 A0A1V5S3T7_9FIRM | . . . . . T . ENNP                | CYLCARMRRG  | GLY . AKAKEL    | CNKIALGHHM | SDVIET | TL      | MGMMY  | GSQ    | LQGM   | PKL        |
| tr R6RUM4 R6RUM4_9CLOT         | . . . . . T . EKNP                | CYLCARMRRG  | GLY . SQAKKL    | CNKIALGHHF | NDVIET | TL      | LMGFY  | GSQ    | LQAM   | PKL        |
| tr R5W094 R5W094_9FIRM         | . . . . . D . SKSP                | CYLCARMRRG  | GLY . NKAKEL    | CNKIALGHHF | DDVIET | TL      | LSMFY  | GAET   | IKTMM  | PKL        |
| tr R5L3B5 R5L3B5_9CLOT         | . . . . . A . GGNP                | CYLCARMRRG  | GLY . AKAQEL    | CNKIALGHHF | SDVIET | TL      | LMGFY  | GSQ    | LQAM   | PKL        |
| tr R7FE98 R7FE98_9FIRM         | . . . . . I . DDSP                | CYLCARMRRG  | GLY . QNAKAL    | CNKIALGHHF | DDVIET | IL      | MGMLY  | GAQ    | VQTM   | PKL        |
| tr R6YEJ3 R6YEJ3_9CLOT         | . . . . . I . GQGP                | CYLCARMRRG  | GLY . TKAKEL    | CNKIALGHHF | DDVIET | IL      | NLMFY  | GST    | VKSMM  | PKL        |
| tr A0A1I6KMM6 A0A1I6KMM6_9FIRM | . . . . . I . EDSP                | CYLCARMRRG  | GLY . KNAQAL    | CNKIALGHHF | DDVIET | TL      | MSMLY  | SGQ    | FKTMM  | PKL        |
| tr R6H344 R6H344_9FIRM         | . . . . . D . SKSP                | CYLCARMRRG  | GLY . NKAKEI    | CNKIALGHHF | DDVIET | TL      | LSMFY  | GAET   | IKTMM  | PKL        |
| tr A0A1I0PPQ4 A0A1I0PPQ4_9FIRM | . . . . . V . ENT                 | CYLCARMRRG  | GLY . SNAQRL    | CNKIALGHHF | DDVIET | IL      | MGMFY  | GK     | YETMM  | PKL        |
| tr W6RY21 W6RY21_9CLOT         | . . . . . I . DESP                | CYLCARMRRG  | GLY . KHAQRL    | CNKIALGHHF | DDVIET | IL      | MSMLY  | NGQ    | LRTMM  | PKL        |
| tr R7IG73 R7IG73_9FIRM         | . . . . . N . EKSP                | CYMCARMRRG  | GLY . NKAKEL    | CNKIALGHHF | DDVIET | TL      | LSMFY  | GSE    | VKTMM  | PKL        |
| tr A0A2N2CP79 A0A2N2CP79_9FIRM | . . . . . T . DRSP                | CYLCARMRRG  | GLY . SHAKEL    | CNKIALGHHF | DDVIET | IL      | MSMFY  | GAE    | YSMM   | PKL        |
| tr A0A143XLN2 A0A143XLN2_9FIRM | . . . . . V . HDSP                | CYLCARMRRG  | GLY . AYAKEL    | CNKIALGHHF | DDVIET | TL      | MSMLY  | SGQ    | KMSMM  | PKL        |
| tr A0A1H6QCX8 A0A1H6QCX8_9LACO | . . . . . D . FKNP                | CYFCARMRRG  | GLY . KQAKQL    | CNKIALGHHM | DDVIET | TL      | LSMFY  | GAE    | VKTMM  | PKL        |
| tr A0A1C0BW61 A0A1C0BW61_9FIRM | . . . . . I . EKNP                | CYLCARMRRG  | GLY . RYAKDL    | CNKIALGHHY | DDVIET | TL      | MNLFY  | AGE    | VKTMM  | PKL        |
| tr A0A2D5QQY5 A0A2D5QQY5_9DELT | . . . . . P . GQIP                | CAVCGRLRG   | GLN . QWCADH    | FNKIALGHHL | DDAIET | FM      | LNLF   | FRRI   | DP     | LKPLT      |
| tr A0A2F0AQ31 A0A2F0AQ31_9DELT | . . . . . P . GQIP                | CSICSRMRG   | GLN . HWCABH    | FNKIALGHHL | DDAIET | FF      | LNLF   | FRRI   | DP     | LKAIT      |
| tr A0A2E7ZQY1 A0A2E7ZQY1_9DELT | . . . . . P . NQTP                | CALCSRMRG   | GLN . QWCASQ    | FNKIALGHHL | DDAVET | FF      | LNLF   | GRR    | LQPM   | KATT       |
| tr A0A2D4BV86 A0A2D4BV86_PYTIN | . . . . . G . . . . NSL           | LAYTSRMRG   | GLY . TCCRKN    | KNKLVLGHHL | DDVAES | FF      | MSAMHN | Q      | LRTM   | RAKY       |
| tr X6FPF3 X6FPF3_RETFI         | . . . . . . . . . DEKKS           | CSFCSRMRG   | GLY . EVORTH    | GNVNLAMG   | QHL    | DDL     | ESF    | MSAFF  | NGQ    | VQTM       |
| tr F0ZRB4 F0ZRB4_DICPU         | . . . . . E . . . . GNKE          | CAFCSRMRG   | GLY . NTCRKE    | GNVNLALG   | QHL    | DDL     | ESF    | MSALYN | G      | LSTMKVNY   |
| tr A9V248 A9V248_MONBE         | . . . . . Q . . . . PPSI          | CSWCSRMRG   | GLY . SCILRR    | GNVNLALG   | QHL    | DDL     | ESF    | MSFHN  | G      | LRTMKAHY   |
| tr D8MAU8 D8MAU8_BLAHO         | . . . . . N . . . . GSI           | CSWCSRMRG   | GLY . STMRRE    | GNVNLVLA   | QHL    | DDL     | ESF    | MSVFHN | G      | LRTMKACY   |
| tr A0A2R5G6L3 A0A2R5G6L3_9STRA | . . . . . G . . . . TSI           | CSFCSRMRG   | GLY . GCAREH    | GNKLVLA    | QHL    | DDL     | SAET   | LM     | GLFHNG | IARAMANY   |
| tr A0A196SC40 A0A196SC40_BLAHN | . . . . . N . . . . GSI           | CSWCSRMRG   | GLY . STILRR    | GNVNLVLA   | QHL    | DDL     | ESF    | MSVFHN | G      | LRTMKACY   |
| tr R1G128 R1G128_EMIHU         | . . . . . . . . . GNRV            | CSFCSRMRG   | GLY . ATARRE    | GNVNLAMA   | QHL    | DDL     | ESF    | MSALHN | G      | LRTSMKTHY  |
| tr K3WC28 K3WC28_PYTUL         | . . . . . G . . . . DSL           | CSFCSRMRG   | GLY . TCORTQ    | GNKLVLA    | QHL    | DDL     | ESF    | MSAMHN | G      | LRTMKAKY   |
| tr A0A225V7N4 A0A225V7N4_9STRA | . . . . . G . . . . DSL           | CSYCSRMRG   | GLY . SCCKRY    | GNKLVLA    | QHL    | DDL     | ESF    | MSAMHN | G      | LRTMKAKY   |
| tr L1IU52 L1IU52_GUITH         | . . . . . . . . . SLQKNS          | CSFCSRMRG   | GLY . SVCKER    | GNVNLALG   | QHL    | DDL     | QAES   | FL     | MSAFHN | GQ         |
| tr A0A067BZA0 A0A067BZA0_SAPPC | . . . . . G . . . . DSL           | CAYCSRMRG   | GLY . TCCRKN    | GNKLVLA    | QHL    | DDL     | ESF    | MSAMYN | G      | QVRTMKAKY  |
| tr W4GX72 W4GX72_9STRA         | . . . . . G . . . . DSL           | CAYCSRMRG   | GLY . SCCRTH    | FNKLLLA    | QHL    | DDL     | ESF    | MSAMYN | G      | QVRTMKAKY  |
| tr A0A0M0J3A1 A0A0M0J3A1_9EUKA | . . . . . . . . . GNRV            | CSFCSRMRG   | GLY . ATARRE    | GNVNLAMA   | QHL    | DDL     | ESF    | MSAMHN | G      | LRTSMKACY  |
| tr A0A1R2BZ72 A0A1R2BZ72_9CILI | . . . . . K . . . . KLSL          | CAFCSRMRG   | GLY . SCARRE    | GNVNLALG   | QHL    | DDL     | ESF    | MSIFNN | G      | LRTMKANY   |
| tr A0A0G4ITX6 A0A0G4ITX6_PLABS | . . . . . . . . . RVGSNNRV        | CSFCSRMRG   | GLY . HTARRE    | GNVNLAMG   | QHL    | DDL     | ESF    | MSAFHN | G      | VCTMKAHY   |
| tr A2DFU7 A2DFU7_TRIVA         | . . . . . V . . . . YLENDH        | CHCSRFRRA   | GLM . ELARVF    | CSNKLTLG   | HHL    | DDIVAT  | IL     | MNNT   | THH    | GRFSMAVKL  |
| tr A2FBY7 A2FBY7_TRIVA         | . . . . . V . . . . YLENDH        | CHCSRFRRA   | GLM . ELARVF    | CSNKLTLG   | HHL    | DDIVAT  | IL     | MNNT   | THH    | GRFAGMAVKL |
| tr A0A0S8JSR5 A0A0S8JSR5_9BACE | . . . . . . . . . TVDPKKAP        | CFICSWNRKR  | GLY . ELISKEL   | CNKVALGHH  | KDDAI  | QTVLNMN | I      | FHGS   | ISL    | LPQKL      |
| tr R5INZ9 R5INZ9_9BACT         | . . . . . . . . . TDTRKSP         | CFILCSWYRKA | GLY . DIAKEYN   | CNKIALGHH  | QDDIL  | QTL     | LMNMTH | Q      | GAFTG  | IMPPFL     |
| tr A0A2P8XLW5 A0A2P8XLW5_BLAG  | . . . . . . . . . RGCKSV          | CSFCSRMRG   | GLY . AAARGH    | GNVNLALG   | QHL    | DDL     | ESF    | MSVFHN | G      | LRTMKAHY   |
| tr A0A1D2NEM1 A0A1D2NEM1_ORCCI | . . . . . . . . . PENVSI          | CSFCSRMRG   | GLY . ACARTN    | GNVNLALG   | QHL    | DDL     | ESF    | MSVFHN | G      | LRTMKAAY   |
| tr A0A0L8G5Z7 A0A0L8G5Z7_OCTEM | . . . . . . . . . YKCSI           | CSFCSRMRG   | GLY . MCARRE    | GNVNLALG   | QHL    | DDL     | ESF    | MSFHN  | G      | IMRTMKANY  |
| tr A0A1E7F863 A0A1E7F863_9STRA | . . . . . G . . . . QOASL         | CAFCSRMRG   | GLY . ACARKNN   | CNKLVLA    | QHL    | DDL     | ESF    | MSVMHN | G      | LRTMKANY   |
| tr D7FR81 D7FR81_ECTSI         | . . . . . . . . . QGDSL           | CAFCSRMRG   | GLY . ACCREQ    | GNKLVLA    | QHL    | DDL     | ESF    | MSALHN | G      | QVRTMKANY  |
| tr W4YEI7 W4YEI7_STRPU         | . . . . . . . . . DGCA            | CSFCSRMRG   | GLY . ACARRE    | GNVNLAMG   | QHL    | DDL     | ESF    | MSVFHN | G      | LRTMKANY   |
| tr A0A1S3HZF4 A0A1S3HZF4_LINUN | . . . . . . . . . YECASI          | CSFCSRMRG   | GLY . HCARRE    | GNVNLALG   | QHL    | DDL     | ESF    | MSIFHN | G      | LRTMKANY   |
| tr Q5AGN1 Q5AGN1_DICDI         | . . . . . . . . . REGIENKA        | CAYCSRMRG   | GLY . DICRRE    | GNVNLALG   | QHL    | DDL     | ESF    | MSAFYN | G      | MLSTMVNY   |
| tr A0A068W8K2 A0A068W8K2_ECHGR | . . . . . G . . . . DSI           | CAFCSRMRG   | GLY . SCCRKY    | GNKLVLA    | QHL    | DDL     | CVES   | FL     | MSMYNG | V          |
| tr D3BIK4 D3BIK4_POLPP         | . . . . . . . . . NQCS            | CSFCSRMRG   | GLY . AVALRH    | GNVNLALG   | QHL    | DDL     | ESF    | MSCFHN | G      | SMNTMKANY  |
| tr F2U6G2 F2U6G2_SALR5         | . . . . . . . . . KEGSSRA         | CAFCSRMRG   | GLY . NVCRQNN   | FTLLALG    | QHL    | DDL     | ESF    | MSAFYN | G      | KLSSMKVNY  |
| tr A0A068XG12 A0A068XG12_HYMMI | . . . . . . . . . EQCS            | CSFCSRMRG   | GLY . AAALKH    | GNVNLALG   | QHL    | DDL     | ESF    | MSCFHN | G      | AMNTMKANY  |
| tr V4AD74 V4AD74_LOTGI         | . . . . . . . . . YECASI          | CSFCSRMRG   | GLY . ACARRE    | GNVNLALG   | QHL    | DDL     | ESF    | MSFHN  | G      | LRTMKACY   |
| tr K1QLCO K1QLCO_CRAGI         | . . . . . . . . . ENCA            | CSFCSRMRG   | GLY . ACARKNN   | GNVNLALG   | QHL    | DDL     | ESF    | MSFHN  | G      | LRTMKAHY   |
| tr A7RG26 A7RG26_NEMVE         | . . . . . . . . . TPEKH           | KIAFASTKC   | GLY . RKFI      | LISWKKR    | T      | KKIRT   | GNFYK  | G      | ITLFI  | MSVFHN     |
| tr A9V7P3 A9V7P3_MONBE         | . . . . . . . . . ENLASI          | CSFCSRMRG   | GLY . ACARRE    | GNVNLAMG   | QHL    | DDL     | MAES   | LM     | MSLFHN | G          |
| tr A0A1W0WVL6 A0A1W0WVL6_HYPDU | . . . . . . . . . KDVHSI          | CSFCSRMRG   | GLY . SCARRE    | GNVNLAF    | QHL    | DDL     | ESF    | MSFHN  | G      | LRTMKACY   |
| tr A0A1D1W406 A0A1D1W406_RAMVA | . . . . . . . . . EELNSI          | CSFCSRMRG   | GLY . ACARRN    | GNVNLAF    | QHL    | DDL     | ESF    | MSVFHN | G      | LRTMKASY   |
| tr A0A0T6A0X9 A0A0T6A0X9_9BACT | . . . . . . . . . H . G . . .     | CDVCSRHRRL  | GLY . RIAAEQE   | CTVLA      | LGH    | TAD     | CAE    | ALL    | RN     | LFNGRIASLP |
| tr A0A2N9N1R3 A0A2N9N1R3_9BACT | . . . . . . . . . H . G . . .     | CDVCSRFRRA  | GLY . EIAHN     | GNVLA      | F      | AGHTA   | DD     | CE     | ALL    | RN         |
| tr A0A2V8TFL7 A0A2V8TFL7_9BACT | . . . . . . . . . H . G . . .     | CDLCSRFRRA  | GLY . QIVRAL    | GANVLA     | F      | AGHTA   | DD     | CE     | ALL    | RN         |
| tr A0A1F7P5T9 A0A1F7P5T9_9BACT | . . . . . . . . . H . G . . .     | CDVCSRHRRL  | GLY . QAAQDL    | CSVLA      | LGH    | TAD     | CAE    | ALL    | RN     | LFNGRIASLP |
| tr A0A1F7N3C9 A0A1F7N3C9_9BACT | . . . . . . . . . R . H . G . . . | CDVCSRHRRL  | GLY . QAAQDL    | CSVLA      | LGH    | TAD     | CAE    | ALL    | RN     | LFNGRIASLP |
| tr A0A2V2GQB9 A0A2V2GQB9_9FIRM | . . . . . . . . . RK . . . . ENP  | CSLCAKMRG   | GLY . L . DA    | IA         | EA     | EA      | EA     | EA     | EA     | EA         |
| tr B1I340 B1I340_DESAP         | . . . . . . . . . KE . . . . GMPN | CRKGLKGLA   | GLY . L . QALSL | GANVLA     | LGH    | L       | DD     | VIET   | Y      | LN         |
| tr B7ASR1 B7ASR1_9FIRM         | . . . . . . . . . I . EKSP        | CYLCARMRRG  | GLY . SYAKEL    | CNKIALGHHY | DDVIET | IL      | MGMLY  | GAQ    | IQTM   | PKL        |
| tr A0A1S9BX99 A0A1S9BX99_9FIRM | . . . . . . . . . I . PKSP        | CYVCARMRRG  | GLY . KEAQKL    | CNKIALGHHF | DDVIET | IL      | MGMLY  | GAQ    | YETMM  | PKL        |
| tr A0A174CU43 A0A174CU43_ANAHA | . . . . . . . . . I . EKSP        | CYLCARMRRG  | GLY . SKAKEL    | CNKIALGHHY | DDVIET | IL      | MGMLY  | GAQ    | VQTM   | PKL        |
| tr A0A1C5WY74 A0A1C5WY74_9CLOT | . . . . . . . . . V . DKSP        | CYLCARMRRG  | GLY . SHAKEL    | CNKIALGHHF | DDVIET | TL      | MGMLY  | GAQ    | VETMM  | PKL        |
| tr A0A1H9ZZ08 A0A1H9ZZ08_9FIRM | . . . . . . . . . I . PKSP        | CYLCARMRRG  | GLY . SRAKEL    | CNKIALGHHF | DDVDET | VL      | MGMLY  | FAK    | G      | YETMM      |
| tr R7E959 R7E959_9FIRM         | . . . . . . . . . V . DQSP        | CYLCARMRRG  | GLY . HKAQEL    | CNKIALGHHY | DDVIET | IL      | MGMLY  | GAQ    | VQTM   | PKL        |
| tr A0A1G5EN24 A0A1G5EN24_9FIRM | . . . . . . . . . V . TDSP        | CYLCARMRRG  | GLY . KKAQEM    | CNKIALGHHY | DDVIET | IL      | MGMLY  | GAQ    | VQTM   | PKL        |
| tr R6QSU6 R6QSU6_9FIRM         | . . . . . . . . . V . EKSP        | CYLCARMRRG  | GLY . NKAKEL    | CNKIALGHHY | DDVIET | IL      | MGMLY  | GAQ    | VQTM   | PKL        |

|                                |           |           |             |     |        |            |        |    |       |      |        |   |
|--------------------------------|-----------|-----------|-------------|-----|--------|------------|--------|----|-------|------|--------|---|
| tr D5HJ18 D5HJ18_9FIRM         | . . . . . | . V. EKSP | CYLCARMRRG  | HL  | SYAKEL | CNKIALGHHY | DDVIET | IL | MGMLY | GAQM | QTMMPK | L |
| tr A0A1C5QB90 A0A1C5QB90_9FIRM | . . . . . | . I. DRNP | CYLCARMRRG  | LY  | AKAKEL | CNKIALGHHF | DDVIET | IL | MGMLY | SGKV | ETMMPK | L |
| tr A0A1H9TDF0 A0A1H9TDF0_9FIRM | . . . . . | . I. EKSP | CYLCARMRRG  | LY  | SYAQKL | CNKIALGHHY | DDVIET | IL | MGMLY | GAQI | QTMMPK | L |
| tr A0A1C5KP23 A0A1C5KP23_9CLOT | . . . . . | . I. DKNP | CYLCARMRRG  | LY  | SHAKEL | CNKIALGHHF | DDVIET | IL | MGMLY | GAKI | ETMMPK | L |
| tr R5C7F1 R5C7F1_9FIRM         | . . . . . | . I. KSP  | CYLCARMRRG  | HL  | KKAKEL | CNKIALGHHY | DDVIET | AF | MGMLY | SGQW | EAMLPK | L |
| tr R6LWZ2 R6LWZ2_9FIRM         | . . . . . | . V. EKSP | CYLCARMRRG  | LY  | SYAKKL | CNKIALGHHY | DDVIET | IL | MGMLY | GAQI | QTMMPK | L |
| tr R5R1U1 R5R1U1_9FIRM         | . . . . . | . I. EKSP | CYLCARMRRG  | HL  | SFAKEM | CNKIALGHHF | DDVIET | IL | MGMLY | GGQV | QTMMPK | L |
| tr C9KJ69 C9KJ69_9FIRM         | . . . . . | . V. EESS | CYLCARMRRG  | LY  | RKARAL | CNKIALGHHF | DDVIET | NL | MSMLY | SGAI | RTMMPK | V |
| tr R6WDB5 R6WDB5_9FIRM         | . . . . . | . V. EKSP | CYLCARMRRG  | LY  | SKAKEL | CNKIALGHHY | DDVIET | IL | MGMLY | GAQM | QTMMPK | L |
| tr R7BJZ6 R7BJZ6_9FIRM         | . . . . . | . V. EKSP | CYLCARMRRG  | HL  | SKAKEL | CNKIALGHHY | DDVIET | IL | MGMLY | GAQM | QTMMPK | L |
| tr A0A2S6HN32 A0A2S6HN32_9BACE | . . . . . | . V. EKSP | CYLCARMRRG  | HL  | SKAKEL | CNKIALGHHY | DDVIET | IL | MGMLY | GAQM | QTMMPK | L |
| tr A0A1H5UR13 A0A1H5UR13_9FIRM | . . . . . | . I. EKSP | CYLCARMRRG  | LY  | SNAKEL | CNKIALGHHY | DDVIET | IL | MGMLY | GGQI | QTMMPK | L |
| tr B5CL75 B5CL75_9FIRM         | . . . . . | . V. EKSP | CYLCARMRRG  | LY  | SHAQKM | CNKIALGHHY | DDVIET | IL | MGMLY | SAQF | QTMMPK | L |
| tr A0A1Q9JUJ6 A0A1Q9JUJ6_9FIRM | . . . . . | . I. EKSP | CYLCARMRRG  | LY  | SKAKEL | CNKIALGHHY | DDVIET | IL | MGMLY | GGQV | QTMMPK | L |
| tr A0A1I6X423 A0A1I6X423_9FIRM | . . . . . | . I. ENSP | CYLCARMRRG  | HL  | AKAKEL | CNKIALGHHY | DDVIET | IL | MGMLY | GAQV | QTMMPK | L |
| tr R7R0R4 R7R0R4_9FIRM         | . . . . . | . I. EKSP | CYLCARMRRG  | LY  | SKAKEL | CNKIALGHHY | DDVIET | IL | MGMLY | GGQV | QTMMPK | L |
| tr A0A1T4PUK5 A0A1T4PUK5_9FIRM | . . . . . | . I. DKSP | CYLCARMRRG  | LY  | SNAKEL | CNKIALGHHY | DDVIET | IL | MGVLY | GGQV | QTMMPK | L |
| tr A0A174N7L5 A0A174N7L5_9FIRM | . . . . . | . I. ENNP | CYLCARMRRG  | LY  | SHAKEL | CNKIALGHHF | DDVIET | IL | MGMLY | SGKV | ETMMPK | L |
| tr A0A1C5VPX6 A0A1C5VPX6_9FIRM | . . . . . | . I. DKNP | CYLCARMRRG  | LY  | SKAKEL | CNKIALGHHF | DDVIET | IL | MGMLY | SAKI | ETMMPK | L |
| tr U2EG64 U2EG64_9FIRM         | . . . . . | . V. EKSP | CYLCARMRRG  | LY  | SKAKEL | CNKIALGHHY | DDVIET | IL | MGMLY | GAQV | QTMMPK | L |
| tr A0A1T4LYU6 A0A1T4LYU6_9FIRM | . . . . . | . V. EKSP | CYLCARMRRG  | LY  | SNAKEL | CNKIALGHHY | DDVIET | IL | MGMLY | GGQV | QTMMPK | L |
| tr C2KWR4 C2KWR4_9FIRM         | . . . . . | . I. DSSP | CYVCAARMRRG | HL  | SKAKEL | CNKIALGHHF | DDVIET | VL | MGMLY | SGQF | QAMMPK | L |
| tr A0A1Q6S6R3 A0A1Q6S6R3_9FIRM | . . . . . | . I. EDS  | CYLCARMRRG  | LY  | SHAKEL | CNKIALGHHY | DDVIET | IL | MGMLY | GGQV | QTMMPK | L |
| tr A0A1M6E180 A0A1M6E180_9FIRM | . . . . . | . V. EKSP | CYLCARMRRG  | HL  | NKAKEL | CNKIALGHHY | DDVIET | IM | MGMLY | GAQV | QTMMPK | L |
| tr A0A2N5P2N9 A0A2N5P2N9_RUMGN | . . . . . | . V. EKSP | CYLCARMRRG  | HL  | SKAKEL | CNKIALGHHY | DDVIET | IL | MGMLY | GAQV | QTMMPK | L |
| tr R6YU83 R6YU83_9FIRM         | . . . . . | . I. EKNP | CYLCARMRRG  | LY  | SKAKEL | CNKIALGHHF | DDVIET | IL | MGMLY | SGKV | ETMMPK | L |
| tr A0A1C6GY75 A0A1C6GY75_9FIRM | . . . . . | . I. EKSP | CYLCARMRRG  | LY  | NFAKEL | CNKIALGHHY | DDVIET | IL | MGMLY | GAQI | QTMMPK | L |
| tr R2RKU5 R2RKU5_ACIFV         | . . . . . | . I. EDS  | CYLCARMRRG  | LY  | RKAREL | CNKIALGHHF | DDVIET | NL | MSMLY | SGAI | RTMPLR | L |
| tr A0A1I0BL00 A0A1I0BL00_9FIRM | . . . . . | . V. DKNP | CYLCARMRRG  | HL  | SKAKEL | CNKIALGHHY | DDVIET | IL | MGMLY | GAQI | QTMMPK | L |
| tr B0G358 B0G358_9FIRM         | . . . . . | . I. DKNP | CYLCARMRRG  | LY  | SHAKEL | CNKIALGHHY | DDVIET | IL | MGMLY | SGKI | ETMMPK | L |
| tr A0A1H9G440 A0A1H9G440_9FIRM | . . . . . | . K. AGSP | CYLCARMRRG  | ALY | QKAREL | CNKIALGHHY | DDVIET | IL | MGMLY | SGQV | QTMMPK | L |
| tr D4RZP6 D4RZP6_9FIRM         | . . . . . | . V. KQSP | CYLCARMRRG  | LY  | SKAKEL | CNKIALGHHY | DDVIET | IL | MGMLY | GAQV | QTMMPK | L |
| tr R7AKW6 R7AKW6_9CLOT         | . . . . . | . I. EQNP | CYLCARMRRG  | HL  | AQAKAL | CNKIALGHHF | DDVIET | IL | MGMLY | SGKI | ETMMPK | L |
| tr R6M6V2 R6M6V2_9CLOT         | . . . . . | . I. EKSP | CYLCARMRRG  | LY  | NKAKEL | CNKIALGHHY | DDVIET | IL | MGMLY | GGQV | QTMMPK | L |
| tr A0A1D3TT13 A0A1D3TT13_9FIRM | . . . . . | . V. EKSP | CYLCARMRRG  | HL  | SRAKEL | CNKIALGHHY | DDVIET | IL | MGMLY | GAQV | QTMMPK | L |
| tr R5UY37 R5UY37_9FIRM         | . . . . . | . V. ENNP | CYLCARMRRG  | HL  | HOAEVL | CNKIALGHHF | DDVIET | IL | MSMIY | GGQV | ETMMPK | L |
| tr EORVNT EORVNT_BUTTON        | . . . . . | . S. KGSP | CYLCARMRRG  | LY  | SKAKEL | CNKIALGHHY | DDVIET | IF | MGMTY | GGQV | ETMMPK | L |
| tr A0A1I5XQ88 A0A1I5XQ88_9FIRM | . . . . . | . V. SGSP | CYLCARMRRG  | ALY | SKAKEL | CNKIALGHHY | DDVIET | IL | MGMLY | GGQI | QTMMPK | L |
| tr A0A1H3X4G1 A0A1H3X4G1_9FIRM | . . . . . | . I. TSSP | CYLCARMRRG  | LY  | KKAKEL | CNKIALGHHF | DDVIET | AF | MGMMY | SGQW | EAMLPK | L |
| tr A0A1Q9K6P3 A0A1Q9K6P3_9FIRM | . . . . . | . I. EKNP | CYLCARMRRG  | LY  | SRAKSL | CNKIALGHHF | DDVIET | IL | MGMLY | SGKV | ETMMPK | L |
| tr U2U9W4 U2U9W4_9FIRM         | . . . . . | . I. EKSP | CYVCAARMRRG | WLY | RRAREL | CNKIALGHHY | DDVIET | VL | MGMLY | SGQF | QAMMPK | L |
| tr R6NFY6 R6NFY6_9FIRM         | . . . . . | . I. EKSP | CYLCARMRRG  | LY  | SKAKEL | CNKIALGHHY | DDVIET | IL | MGMLY | GAQI | QTMMPK | L |
| tr A0A1H3ZB04 A0A1H3ZB04_9FIRM | . . . . . | . I. EKSP | CYLCARMRRG  | HL  | NAAKER | CNKIALGHHF | DDVIET | IL | MGMLY | GGQV | QTMMPK | L |
| tr A0A1C5LN34 A0A1C5LN34_9FIRM | . . . . . | . I. ENSP | CYLCARMRRG  | LY  | SKAKEL | CNKIALGHHY | DDVIET | IL | MGMLY | GAQV | QTMMPK | L |
| tr A7VHD7 A7VHD7_9CLOT         | . . . . . | . V. EKSP | CYLCARMRRG  | HL  | HFAQEL | CNKIALGHHY | DDVIET | IL | MGMLY | GAQV | QTMMPK | L |
| tr A0A1H2XL03 A0A1H2XL03_9FIRM | . . . . . | . I. DKNP | CYLCARMRRG  | HL  | AKAKEL | CNKIALGHHY | DDVIET | IL | MGMLY | GAQV | QTMMPK | L |
| tr R6URH0 R6URH0_9CLOT         | . . . . . | . V. KYPY | CYLCARMRRG  | LY  | KKAKEL | CNKIALGHHY | DDVIET | IL | MGMLY | GGQV | QTMMPK | L |
| tr R7IV15 R7IV15_9FIRM         | . . . . . | . V. EKSP | CYLCARMRRG  | HL  | NKAKEL | CNKIALGHHY | DDVIET | IL | MGMLY | GAQV | QTMMPK | L |
| tr A6BDB1 A6BDB1_9FIRM         | . . . . . | . I. DKNP | CYLCARMRRG  | LY  | SHAKEL | CNKIALGHHF | DDVIET | IL | MGMFY | GGKV | ETMMPK | L |
| tr A0A239RF45 A0A239RF45_9FIRM | . . . . . | . I. EKSP | CYLCARMRRG  | LY  | SKAKEL | CNKIALGHHF | DDVIET | IL | MGMLY | GAQV | QTMMPK | L |
| tr A0A1I4FSK7 A0A1I4FSK7_9FIRM | . . . . . | . I. EKSP | CYLCARMRRG  | LY  | SNAKKL | CNKIALGHHY | DDVIET | IL | MGMLY | GAQI | QTMMPK | L |
| tr A0A2N0UJ41 A0A2N0UJ41_9FIRM | . . . . . | . V. DKYP | CYLCARMRRG  | LY  | KKAKQL | CNKIALGHHY | DDVIET | IL | MGMLY | GGQV | QTMMPK | L |
| tr A5ZUM5 A5ZUM5_9FIRM         | . . . . . | . B. EQSP | CYLCARMRRG  | LY  | SKAKEL | CNKIALGHHY | DDVIET | IL | MGMLY | GAQV | QTMMPK | L |
| tr A0A1Q9J6X5 A0A1Q9J6X5_9FIRM | . . . . . | . I. EKNP | CYLCARMRRG  | LY  | SKAKEL | CNKIALGHHY | DDVIET | IL | MGMLY | GAQV | QTMMPK | L |
| tr R6QH64 R6QH64_9FIRM         | . . . . . | . I. DKNP | CYLCARMRRG  | LY  | SHAKEL | CNKIALGHHF | DDVIET | IL | MGMLY | SGKI | ETMMPK | L |
| tr A0A255IAE4 A0A255IAE4_9FIRM | . . . . . | . I. EKSP | CYLCARMRRG  | HL  | SKAKEL | CNKIALGHHY | DDVIET | IL | MGMLY | GAQI | QTMMPK | L |
| tr R5D646 R5D646_9FIRM         | . . . . . | . V. EKSP | CYLCARMRRG  | HL  | HFAKDM | CNKIALGHHY | DDVIET | IL | MGMLY | SGQI | QTMMPK | L |
| tr A0A1C5SCE2 A0A1C5SCE2_9CLOT | . . . . . | . I. DRNP | CYLCARMRRG  | NLY | AEAKAL | CNKIALGHHF | DDVIET | IL | MGMLY | SGKI | ETMMPK | L |
| tr G9WU95 G9WU95_9FIRM         | . . . . . | . I. ESSP | CYVCAARMRRG | HL  | SKAKEL | CNKIALGHHF | DDVIET | VL | MGMLY | SGQF | QAMMPK | L |
| tr D4J5M7 D4J5M7_9FIRM         | . . . . . | . I. QKSP | CYLCARMRRG  | HL  | NKAKEL | CNKIALGHHY | DDVIET | IL | MGMLY | GAQV | QTMMPK | L |
| tr A0A1M7SFL4 A0A1M7SFL4_9FIRM | . . . . . | . I. EKSP | CYLCARMRRG  | LY  | SKAKEL | CNKIALGHHF | DDVIET | VL | MGMLY | GGQI | QTMMPK | L |
| tr A0A1C5PQ80 A0A1C5PQ80_9CLOT | . . . . . | . I. EKSP | CYLCARMRRG  | HL  | SYAKEL | CNKIALGHHY | DDVIET | IL | MGMLY | GAQV | QTMMPK | L |
| tr A0A1T4MVX1 A0A1T4MVX1_9FIRM | . . . . . | . I. EKSP | CYLCARMRRG  | LY  | NKAKEL | CNKIALGHHY | DDVIET | VL | MGMLY | GGQV | QTMMPK | L |
| tr R5JHV4 R5JHV4_9FIRM         | . . . . . | . V. EKSP | CYLCARMRRG  | LY  | SKAKEL | CNKIALGHHY | DDVIET | IL | MGMLY | GAQV | QTMMPK | L |
| tr A0A0U5NQ66 A0A0U5NQ66_9CLOT | . . . . . | . V. EKSP | CYLCARMRRG  | LY  | SHAKEL | CNKIALGHHF | DDVIET | TL | MGMFY | SGKV | ETMMPK | L |
| tr R7BIC3 R7BIC3_9FIRM         | . . . . . | . I. EKSP | CYLCARMRRG  | HL  | NKAKEL | CNKIALGHHY | DDVIET | IL | MGMLY | GGQV | QTMMPK | L |
| tr R5EBZ7 R5EBZ7_9CLOT         | . . . . . | . I. GGSP | CYLCARMRRG  | HL  | SQAQKL | CNKIALGHHF | DDVIET | IV | MGMLY | GGQI | QTMMPK | L |
| tr A0A1G5AAM6 A0A1G5AAM6_9FIRM | . . . . . | . I. EKSP | CYLCARMRRG  | LY  | SKAKEL | CNKIALGHHY | DDVIET | IL | MGMLY | GGQI | QTMMPK | L |
| tr A0A1C5QDL9 A0A1C5QDL9_9CLOT | . . . . . | . I. ENSP | CYLCARMRRG  | HL  | AYAKEL | CNKIALGHHY | DDVVE  | IL | MGMLY | GGQV | QTMMPK | L |
| tr A0A1Q9JZU8 A0A1Q9JZU8_9FIRM | . . . . . | . I. EKSP | CYLCARMRRG  | HL  | NKAKEL | CNKIALGHHY | DDVIET | IL | MGMLY | GAQV | QTMMPK | L |
| tr WOFHG5 WOFHG5_9BACT         | . . . . . | . I. KKNP | CYLCARMRRG  | LY  | SRAKTL | CNKIALGHHY | DDVIET | VL | MGMLY | SGQF | RTMMPK | L |
| tr A0A1T4V7R0 A0A1T4V7R0_9FIRM | . . . . . | . I. EKSP | CYLCARMRRG  | LY  | SKAKEL | CNKIALGHHY | DDVIET | IL | MSMIH | GAQI | QTMMPK | L |
| tr U2LSI7 U2LSI7_9FIRM         | . . . . . | . V. QNNP | CYLCARMRRG  | HL  | NKAKEL | CNKIALGHHF | DDVIET | IL | MSMIY | GGQV | ETMMPK | L |
| tr R7C751 R7C751_9CLOT         | . . . . . | . I. EKSP | CYLCARMRRG  | HL  | NFAREL | CNKIALGHHY | DDVIET | IL | MGMLY | GAQV | QTMMPK | L |
| tr A0A1H5X7G0 A0A1H5X7G0_9FIRM | . . . . . | . I. DKSP | CYLCARMRRG  | HL  | SKAKEL | CNKIALGHHY | DDVIET | IL | MGMLY | GGQI | QTMMPK | L |
| tr R5NVSO R5NVSO_9CLOT         | . . . . . | . V. EKSP | CYLCARMRRG  | HL  | SOAKAL | CNKIALGHHY | DDVIET | IL | MGMLY | GAQV | QTMMPK | L |
| tr A0A1G6A4R8 A0A1G6A4R8_EUBOX | . . . . . | . A. KKNP | CYLCARMRRG  | HL  | SKAKEL | CNKIALGHHY | DDVIET | IL | MGMLY | GAQV | QTMMPK | L |
| tr A0A1G5YA12 A0A1G5YA12_9FIRM | . . . . . | . I. EKSP | CYLCARMRRG  | LY  | SRAKEL | CNKIALGHHY | DDVIET | IL | MGMIH | GAQI | QTMMPK | L |
| tr R6ED63 R6ED63_9CLOT         | . . . . . | . I. EKSP | CYLCARMRRG  | LY  | SKAKEL | CNKIALGHHY | DDVIET | IL | MGMLY | GGQV | QTMMPK | L |
| tr A0A1I4A1G1 A0A1I4A1G1_9FIRM | . . . . . | . I. EKSP | CYLCARMRRG  | LY  | NYARDL | CNKIALGHHF | DDVIET | IL | MSMLY | GGQV | QTMMPK | L |
| tr A0A1C5WQ42 A0A1C5WQ42_9FIRM | . . . . . | . I. EKSP | CYLCARMRRG  | LY  | SKAKEL | CNKIALGHHF | DDVIET | IL | MGMLY | GGQV | QTMMPK | L |
| tr A0A0J1GF21 A0A0J1GF21_9FIRM | . . . . . | . V. DDSP | CYLCARMRRG  | LY  | SKAKEL | CNKIALGHHY | DDVIET | IL | MGMMY | GGQI | ETMMPK | L |
| tr B7CBL3 B7CBL3_9FIRM         | . . . . . | . I. EKNP | CYLCARMRRG  | LY  | NYAKNL | CNKIALGHHY | DDVIET | IL | MSMLY | GGQI | QTMMPK | L |
| tr R5ZIH2 R5ZIH2_9FIRM         | . . . . . | . I. KKNP | CYLCARMRRG  | HL  | NYAKQL | CNKIALGHHY | DDVIET | IL | MSMLY | GGQI | QTMMPK | L |
| tr A0A2Y9B607 A0A2Y9B607_RUMFL | . . . . . | . I. EKNP | CYLCARMRRG  | LY  | SHAKAL | CNKIALGHHF | DDVIET | IL | MGMLY | GGQV | QTMMPK | L |
| tr B0MNV3 B0MNV3_9FIRM         | . . . . . | . I. EKSP | CYLCARMRRG  | HL  | NYAKSL | CNKIALGHHY | DDVIET | IL | MGMLY | GAQI | QTMMPK | L |
| tr D4JJE1 D4JJE1_9FIRM         | . . . . . | . I. EKSP | CYLCARMRRG  | HL  | AFAKEL | CNKIALGHHY | DDVIET | IL | MGMLY | GAQV | QTMMPK | L |
| tr A0A173SBL1 A0A173SBL1_9FIRM | . . . . . | . I. EKSP | CYLCARMRRG  | LY  | NFAQQM | CNKIALGHHY | DDVIET | IL | MGMLY | SAQV | QTMMPK | L |
| tr R5GI28 R5GI28_9FIRM         | . . . . . | . V. QNNP | CYLCARMRRG  | HL  | NKAKEL | CNKIALGHHF | DDVIET | IL | MSMIY | GGQV | ETMMPK | L |
| tr R5NQZ4 R5NQZ4_9FIRM         | . . . . . | . I. EKSP | CYLCARMRRG  | HL  | SYAREM | CNKIALGHHY | DDVIET | IL | MGMLY | GAQM | QTMMPK | L |
| tr A0A1C6BHH6 A0A1C6BHH6_9FIRM | . . . . . | . V. ENNP | CYLCARMRRG  | LY  | SKAKEL | CNKIALGHHF | DDVIET | IL | MGMIY | GGQV | QTMMPK | L |
| tr R6NBF8 R6NBF8_9FIRM         | . . . . . | . V. EKSP | CYLCARMRRG  | LY  | KFAKDM | CNKIALGHHY | DDVIET | IL | MGMLY | SGQV | QTMMPK | L |
| tr A5Z569 A5Z569_9FIRM         | . . . . . | . V. EKSP | CYLCARMRRG  | HL  | SFAKEM | CNKIALGHHY | DDVIET | IL | MGMLY | GAQV | QTMMPK | L |
| tr R61848 R61848_9FIRM         | . . . . . | . V. KKSP | CYLCARMRRG  | LY  | KFAQEL | CNKIALGHHY | DDVIET | IL | MGMLY | GAQV | QTMMPK | L |
| tr R5VV47 R5VV47_9CLOT         | . . . . . | . V. DKSP | CYLCARMRRG  | HL  | NYAKEL | CNKIALGHHY | DDVIET | IL | MGMLY | GAQV | QTMMPK | L |
| tr R7HSQ4 R7HSQ4_9CLOT         | . . . . . | . I. EKSP | CYLCARMRRG  | HL  | NFAQQL | CNKIALGHHF | DDVIET | IL | MGMLY | GAQV | QTMMPK | L |
| tr R5SK03 R5SK03_9CLOT         | . . . . . | . V. EKSP | CYLCARMRRG  | HL  | TYAKSM | CNKIALGHHY | DDVIET | IL | MGMLY | GAQI | QTMMPK | L |
| tr R7N692 R7N692_9FIRM         | . . . . . | . V. EKSP | CYLCARMRRG  | LY  | AFAREL | CNKIALGHHY | DDVIET | IL | MGMLY | GAQI | QSMMPK | L |
| tr R5IGR7 R5IGR7_9CLOT         | . .       |           |             |     |        |            |        |    |       |      |        |   |



|                                  |                    |            |    |    |          |   |            |         |    |        |   |     |   |   |   |   |   |   |   |   |   |
|----------------------------------|--------------------|------------|----|----|----------|---|------------|---------|----|--------|---|-----|---|---|---|---|---|---|---|---|---|
| tr R5KSL8 R5KSL8_9FIRM           | . . . . . I . EKSP | CYICARMRRG | HL | Y  | NKAKEL   | G | CNKIALGHHY | DDVIET  | IL | MGMLY  | G | SQV | Q | T | M | P | K | L |   |   |   |
| tr W0U2V4 W0U2V4_9FIRM           | . . . . . V . EKNP | CYLCARMRRG | H  | LY | SKAQEL   | G | CNKIALGHHY | DDVIET  | IL | MSMLY  | G | QQ  | I | Q | T | M | P | K | L |   |   |
| tr A0A11IAHH3 A0A11IAHH3_9FIRM   | . . . . . I . EKSP | CYICARMRRG | HL | Y  | NEAKEL   | G | CNKIALGHHY | DDVIET  | IL | MGMLY  | G | QQV | Q | T | M | P | K | L |   |   |   |
| tr A0A132NXP9 A0A132NXP9_GIATN   | . . . . . Q . TSN  | CSFCARMRRG | T  | LY | THCQKL   | G | INKLALGHH  | EDVNES  | LL | MSLFFN | G | K   | L | W | T | Q | G | P | I |   |   |
| tr A0A146K8R2 A0A146K8R2_9EUKA   | . . . . . P . GTSA | CSFCARMRRG | A  | LY | TFCLEKKI | N | KLALGHH    | ADDAIES | ML | MSQQFN | G | N   | G | T | L | W | T | Q | C | P | V |
| tr B1R6Y8 B1R6Y8_CLOPF           | . . . . . K . DYP  | CYLCARMRRG | S  | LY | GKAKEL   | G | CNKIALGHHF | NDVIET  | TM | LNVL   | Y | A   | G | N | F | K | T | M | P | K | L |
| tr A0A1M6D282 A0A1M6D282_9CLOT   | . . . . . K . DYP  | CYLCARMRRG | S  | LY | SKAKEL   | G | CNKIALGHHF | NDVIET  | TM | LNVL   | Y | A   | G | N | F | K | T | M | P | K | L |
| tr A0A173YDX8 A0A173YDX8_CLOVE   | . . . . . K . DYP  | CYLCARMRRG | S  | LY | AKAREL   | G | CNKIALGHHF | NDVIET  | TM | LNVL   | Y | A   | G | N | F | K | T | M | P | K | L |
| tr A0A1G5RQX6 A0A1G5RQX6_9FIRM   | . . . . . A . DYP  | CYLCARMRRG | I  | LY | KKAQEL   | G | CNKVALGHH  | DDVIET  | TL | LNLF   | F | G   | T | F | T | M | P | K | L |   |   |
| tr D8GMF1 D8GMF1_CLOLD           | . . . . . K . DYP  | CYLCARMRRG | A  | LY | SKAKEL   | G | CNKIALGHHF | NDVIET  | TL | LNLF   | Y | S   | G | S | F | K | T | M | P | K | L |
| tr A0A134AAP6 A0A134AAP6_9FIRM   | . . . . . G . DYP  | CYLCARMRRG | S  | LY | AKAKEL   | G | CNKIALGHHF | NDVIET  | TM | LNVL   | Y | A   | G | N | F | K | T | M | P | K | L |
| tr A0A210N1A5 A0A210N1A5_9CLOT   | . . . . . K . EYP  | CYLCARMRRG | H  | LY | HMAERER  | G | CNKIALGHHF | DDVIET  | VM | LNVL   | V | H   | G | T | F | Q | A | M | P | K | L |
| tr A0A1S1VCE7 A0A1S1VCE7_9FIRM   | . . . . . S . DYP  | CYLCARMRRG | A  | LY | SRAQEL   | G | CNKISLGHH  | NDVIET  | TM | LNVL   | Y | S   | G | N | F | K | T | M | P | K | L |
| tr W8U9H6 W8U9H6_PEPAC           | . . . . . K . DYP  | CYLCARMRRG | A  | LY | SKAKEL   | G | CNKIALGHHY | NDVIET  | TL | LNML   | Y | A   | G | S | F | K | T | M | P | K | L |
| tr A0A1I4WPJ0 A0A1I4WPJ0_9FIRM   | . . . . . S . DYP  | CYLCARMRRG | A  | LY | GKAEEL   | G | CNKIALGHHF | DDVIET  | TM | LNVL   | Y | A   | G | N | F | K | T | M | P | K | L |
| tr ASN1X3 ASN1X3_CLOK5           | . . . . . K . DYP  | CYICARMRRG | A  | LY | SKAQEL   | G | SKLALGHHF  | NDVIET  | TL | LNLF   | Y | G   | S | F | K | T | M | P | K | L |   |
| tr A0A1M6J810 A0A1M6J810_9FIRM   | . . . . . K . DYP  | CYLCARMRRG | A  | LY | SKAQEL   | G | CNKIALGHHF | NDVIET  | TL | LNMF   | Y | A   | G | N | F | K | T | M | P | K | L |
| tr A0A2T0BP99 A0A2T0BP99_9CLOT   | . . . . . R . DYP  | CYLCARMRRG | A  | LY | TKAREL   | G | CNKIALGHHF | NDVIET  | TL | LNLF   | Y | S   | G | N | F | K | T | M | P | K | L |
| tr A0A1I5A132 A0A1I5A132_9CLOT   | . . . . . Q . DYP  | CYLCARMRRG | S  | LY | EYAQSL   | G | CNKIALGHHF | NDVIET  | VM | LNVL   | Y | G   | T | F | K | S | M | P | K | L |   |
| tr A0A0X8JSV6 A0A0X8JSV6_9FUSO   | . . . . . K . DYP  | CYLCARMRRG | A  | LY | TKAVSL   | G | CNKIALGHHF | DDVET   | TL | MSMF   | Y | M   | G | K | F | E | T | M | P | K | L |
| tr A0A101WQZ2 A0A101WQZ2_9FIRM   | . . . . . K . DYP  | CYLCARMRRG | A  | LY | SKAMEL   | G | CNKIALGHHF | NDVIET  | TM | LNLF   | Y | T   | G | S | F | K | T | M | P | K | L |
| tr K0B3S7 K0B3S7_CLOA9           | . . . . . K . DYP  | CYLCARMRRG | S  | LY | AKASEL   | G | CNKIALGHHF | NDVIET  | TM | LNVL   | Y | S   | G | N | F | K | T | M | P | K | L |
| tr A0A0P8VR55 A0A0P8VR55_9CLOT   | . . . . . Q . DYP  | CYLCARMRRG | A  | LY | NKAQEL   | G | CNKIALGHHF | NDVIET  | TL | LNLF   | Y | A   | G | C | F | K | T | M | P | K | L |
| tr A0A069R172 A0A069R172_PELI    | . . . . . K . DYP  | CYLCARMRRG | A  | LY | SKAKEL   | G | CNKIALGHHF | NDVIET  | TL | LNMF   | Y | A   | G | S | F | K | T | M | P | K | L |
| tr A0A1M6RYX4 A0A1M6RYX4_9CLOT   | . . . . . S . ENP  | CYLCARMRRG | A  | LY | SKAKEL   | G | CNKIALGHHF | NDVIET  | TL | LNLF   | Y | S   | G | N | F | K | T | M | P | K | L |
| tr A0A095XS5V5 A0A095XS5V5_9FIRM | . . . . . S . DYP  | CYLCARMRRG | A  | LY | GKAEEL   | G | CNKIALGHHF | DDVIET  | TM | MNLC   | S | G   | N | F | K | T | M | P | K | L |   |
| tr A0A1V4SXM9 A0A1V4SXM9_9CLOT   | . . . . . R . EYP  | CYLCARMRRG | S  | LY | AKAQEL   | G | CNKIALGHHY | NDVIET  | TL | LNVL   | Y | A   | G | N | F | K | T | M | P | K | L |
| tr D0GJU2 D0GJU2_9FUSO           | . . . . . K . DYP  | CYLCARMRRG | S  | LY | TKAASY   | G | CNKIALGHH  | DDVIET  | TL | MSIFYM | G | K   | F | E | T | M | P | K | L |   |   |
| tr A0A1U7M2L2 A0A1U7M2L2_TISCR   | . . . . . G . DYP  | CYLCARMRRG | S  | LY | AKAQEL   | G | CNKIALGHHF | NDVIET  | TM | LNVL   | Y | A   | G | N | F | K | T | M | P | K | L |
| tr A0A099RUP9 A0A099RUP9_9CLOT   | . . . . . R . DYP  | CYLCARMRRG | S  | LY | NKAQEL   | G | CNKIALGHHF | NDVIET  | TL | LNLF   | Y | S   | G | N | F | K | T | M | P | K | L |
| tr A0A0L0W9M4 A0A0L0W9M4_CLOPU   | . . . . . K . DYP  | CYLCARMRRG | A  | LY | SKAQEL   | G | CNKIALGHHF | NDVIET  | TL | LNVL   | Y | S   | G | N | F | K | T | M | P | K | L |
| tr A0A1F8TXJ0 A0A1F8TXJ0_9FIRM   | . . . . . K . DYP  | CYLCARMRRG | A  | LY | SKAQEL   | G | CNKIALGHHF | NDVIET  | TM | LNIA   | T | G   | C | F | K | T | M | P | K | L |   |
| tr U2SSC1 U2SSC1_9FUSO           | . . . . . K . DYP  | CYLCARMRRG | S  | LY | TKATSL   | G | CNKIALGHHF | DDVET   | TL | MSMF   | Y | M   | G | K | F | E | T | M | P | K | L |
| tr A0A1G4FP35 A0A1G4FP35_9FIRM   | . . . . . K . DYP  | CYLCARMRRG | A  | LY | RRASEL   | G | CNKIALGHHF | NDVIET  | IM | LNVL   | Y | S   | G | N | F | K | T | M | P | K | L |
| tr U4KQE2 U4KQE2_9MOLU           | . . . . . S . DNP  | CYLCARMRRG | F  | LY | NAAKEL   | G | CNKIALGHHY | NDVIET  | TM | LNVL   | Y | G   | G | F | K | T | M | P | K | L |   |
| tr V7I162 V7I162_9CLOT           | . . . . . Q . DYP  | CYLCARMRRG | S  | LY | EKAKAL   | G | CNKIALGHHF | NDVIET  | AL | LNVI   | Y | G   | T | F | K | A | M | L | P | K | L |
| tr A0A1H3AQW8 A0A1H3AQW8_9FIRM   | . . . . . E . DYP  | CYLCARMRRG | A  | LY | GKAQEL   | G | CNKIALGHHF | NDVIET  | TL | LNLC   | S | G   | N | F | K | T | M | P | K | L |   |
| tr F9VJ52 F9VJ52_ARTSS           | . . . . . R . DYP  | CYLCARMRRG | F  | LY | AKAKEL   | N | KNLALGHHF  | NDVIET  | TL | LNVI   | Y | S   | G | N | F | K | T | M | P | K | L |
| tr A0A084J8N3 A0A084J8N3_9CLOT   | . . . . . K . DYP  | CYLCARMRRG | A  | LY | SEAEEL   | G | CNKIALGHHF | NDVIET  | TM | LNVL   | Y | G   | T | F | K | T | M | P | K | L |   |
| tr A0A1T4XT21 A0A1T4XT21_9CLOT   | . . . . . K . DYP  | CFMCARMRRG | A  | LY | SKAKEL   | G | CNKIALGHHF | DDVIET  | VL | LNIFYT | G | C   | F | K | T | M | P | K | L |   |   |
| tr A0A1M6CD68 A0A1M6CD68_9CLOT   | . . . . . K . DYP  | CYLCARMRRG | A  | LY | SKAQEL   | G | CNKIALGHHF | NDIET   | TM | MNLYT  | G | S   | F | K | T | M | P | K | L |   |   |
| tr E3PXH3 E3PXH3_ACESD           | . . . . . Q . DYP  | CYLCARMRRG | A  | LY | NKTEEL   | G | CNKIALGHHF | NDVIET  | TM | LNMLY  | T | G   | A | F | K | T | M | P | K | L |   |
| tr A0A1D8GNY9 A0A1D8GNY9_9CLOT   | . . . . . K . DYP  | CYLCARMRRG | A  | LY | KRAQAL   | G | CNKIALGHHF | NDVIET  | TM | LNMLY  | T | G   | S | F | K | T | M | P | K | L |   |
| tr L1QHD2 L1QHD2_9CLOT           | . . . . . K . EYP  | CYLCARMRRG | S  | LY | NKAREL   | G | CNKIALGHHY | NDVIET  | TM | LNVL   | Y | A   | G | N | F | K | T | M | P | K | L |
| tr A0A0E3JQG2 A0A0E3JQG2_CLOSL   | . . . . . Q . KYP  | CYLCARMRRG | A  | LY | TKAKEL   | G | CNKIALGHHF | NDVIET  | TL | LNVL   | Y | S   | G | N | F | K | T | M | P | K | L |
| tr A0A2N1PGX0 A0A2N1PGX0_9BACT   | . . . . . S . DNP  | CYLCARMRRG | F  | LY | NAAQEM   | G | CNKIALGHHF | DDVIET  | TM | LNVL   | Y | G   | G | F | K | T | M | P | K | L |   |
| tr D9SL09 D9SL09_CLOC7           | . . . . . Q . DYP  | CYLCARMRRG | V  | LY | SKAQEL   | G | CNKIALGHHY | NDVIET  | TM | LNLF   | Y | A   | G | N | F | K | T | M | P | K | L |
| tr A0A239JSI7 A0A239JSI7_9FIRM   | . . . . . K . DYP  | CYLCARMRRG | A  | LY | RKTQEL   | G | CNKIALGHHF | NDVIET  | TM | LNLF   | Y | T   | G | K | V | S | T | M | P | K | L |
| tr A0A2N2EED3 A0A2N2EED3_9FIRM   | . . . . . N . DYP  | CYLCARMRRG | F  | LY | AKAQEL   | N | KNLALGHHF  | NDVIET  | TL | MNLY   | Y | A   | G | S | F | K | T | M | P | K | L |
| tr A0A2N2B2N9 A0A2N2B2N9_9FIRM   | . . . . . K . DYP  | CYLCARMRRG | A  | LY | AKAQEL   | K | CNKIALGHHF | NDVIET  | TL | MNLY   | Y | A   | G | S | F | K | T | M | P | K | L |
| tr A0A1M6R9N3 A0A1M6R9N3_9CLOT   | . . . . . Q . DYP  | CYLCARMRRG | A  | LY | NKAQEL   | G | CNKVALGHHF | NDVIET  | TL | LNVL   | Y | S   | G | N | F | K | T | M | P | K | L |
| tr A0A1I3QLZ5 A0A1I3QLZ5_9FIRM   | . . . . . S . DYP  | CYLCARMRRG | A  | LY | NKAEEL   | G | CNKIALGHHF | DDVIET  | TM | LNLC   | A | G   | N | F | K | T | M | P | K | L |   |
| tr A0A1V1HZ83 A0A1V1HZ83_9FIRM   | . . . . . K . DYP  | CYLCARMRRG | A  | LY | SKAEEL   | G | CNKIALGHHY | DDVIET  | TM | LNLC   | A | G   | N | F | K | T | M | P | K | L |   |
| tr A0A0R3JYX8 A0A0R3JYX8_9CLOT   | . . . . . K . DYP  | CYLCARMRRG | A  | LY | SKAKEL   | G | CNKIALGHHY | NDVIET  | TL | LNVL   | Y | S   | G | N | F | K | T | M | P | K | L |
| tr A0A1M4T9L7 A0A1M4T9L7_9FIRM   | . . . . . N . DYP  | CYLCARMRRG | S  | LY | GKAKEL   | G | CNKIALGHHF | NDVIET  | TM | LNLC   | A | G   | S | F | K | T | M | P | K | L |   |
| tr A0A1C6BDC9 A0A1C6BDC9_9CLOT   | . . . . . K . EYP  | CYLCARMRRG | S  | LY | AKAREL   | G | CNKIALGHHY | NDVIET  | TM | LNVL   | Y | A   | G | N | F | K | T | M | P | K | L |
| tr R7RQE1 R7RQE1_9CLOT           | . . . . . K . DYP  | CYLCARMRRG | A  | LY | SKAKEL   | G | CNKIALGHHF | NDVIET  | IM | LNVL   | Y | S   | G | N | F | K | T | M | P | K | L |
| tr A0A1I2P6D5 A0A1I2P6D5_9CLOT   | . . . . . Q . EYP  | CYLCARMRRG | F  | LY | AKAKEL   | G | CNKIALGHHF | NDVIET  | TM | LNVL   | Y | A   | G | N | F | K | T | M | P | K | L |
| tr A0A1V4IHV8 A0A1V4IHV8_9CLOT   | . . . . . S . DYP  | CYLCARMRRG | A  | LY | SKAQEL   | G | CNKVALGHHY | NDVIET  | VL | LNVL   | Y | S   | G | N | F | K | T | M | P | K | L |
| tr A0A1M5UPJ6 A0A1M5UPJ6_9CLOT   | . . . . . K . DYP  | CYLCARMRRG | F  | LY | SKALEL   | G | CNKIALGHHF | DDVIET  | TM | LNVL   | Y | S   | G | S | F | K | T | M | P | K | L |
| tr A0A1M4VWP2 A0A1M4VWP2_9CLOT   | . . . . . K . DYP  | CYLCARMRRG | A  | LY | SKAKEL   | G | CNKIALGHHY | NDVIET  | TM | LNVL   | Y | S   | G | N | F | K | T | M | P | K | L |
| tr M1Z6M0 M1Z6M0_9FIRM           | . . . . . E . DYP  | CYLCARMRRG | A  | LY | GKAQEL   | G | CNKIALGHHF | NDVIET  | TL | LNLC   | S | G   | N | F | K | T | M | P | K | L |   |
| tr A0A0P8YVR7 A0A0P8YVR7_9CLOT   | . . . . . G . DYP  | CFMCARMRRG | A  | LY | SRAQEL   | G | CNKIALGHHF | NDVIET  | VL | LNLFY  | T | G   | S | F | K | S | M | P | K | L |   |
| tr A0A1I7IFT5 A0A1I7IFT5_9CLOT   | . . . . . K . DYP  | CYLCARMRRG | S  | LY | SKAQEL   | G | CNKIALGHHY | NDVIET  | TM | LNVL   | Y | G   | N | F | K | T | M | P | K | L |   |
| tr A0A1V4IEB9 A0A1V4IEB9_9CLOT   | . . . . . K . DYP  | CYLCARMRRG | S  | LY | AKAEFF   | G | CNKIALGHHY | NDVIET  | TM | LNLF   | Y | G   | N | F | K | T | M | P | K | L |   |
| tr A0A1S8TRH4 A0A1S8TRH4_9CLOT   | . . . . . K . EYP  | CYLCARMRRG | S  | LY | AKAEFF   | G | CNKIALGHHY | NDVIET  | TM | LNLF   | Y | S   | G | N | F | K | T | M | P | K | L |
| tr A0A0L6ZAD3 A0A0L6ZAD3_9CLOT   | . . . . . K . DYP  | CYLCARMRRG | F  | LY | SKAKEL   | G | CNKLSLGH   | NDVIET  | TL | LNLF   | Y | A   | G | N | F | K | T | M | P | K | L |
| tr A0A150FSS8 A0A150FSS8_CLOPD   | . . . . . S . DYP  | CYLCARMRRG | A  | LY | SKAQEL   | G | CNKIALGHHF | NDVIET  | TM | LNLF   | Y | A   | G | S | F | K | T | M | P | K | L |
| tr A0A2I4P454 A0A2I4P454_CLOBO   | . . . . . K . DYP  | CYLCARMRRG | A  | LY | SKAQEL   | G | CNKIALGHHF | NDVIET  | IL | LNVL   | Y | A   | G | N | F | K | T | M | P | K | L |
| tr A0A1T4W6M5 A0A1T4W6M5_9CLOT   | . . . . . K . DYP  | CYLCARMRRG | A  | LY | SKAQEL   | G | CNKIALGHHF | NDVIET  | TL | LNVL   | Y | T   | G | N | F | K | T | M | P | K | L |
| tr A0A1W1XPH3 A0A1W1XPH3_9CLOT   | . . . . . K . DYP  | CYLCARMRRG | A  | LY | SKAKEL   | G | CNKIALGHHF | NDIET   | TM | LNVL   | Y | S   | G | N | F | K | T | M | P | K | L |
| tr A0A0C1U2P7 A0A0C1U2P7_9CLOT   | . . . . . K . DYP  | CYLCARMRRG | A  | LY | SKAQEL   | G | CNKIALGHHF | NDVIET  | TL | LNVL   | Y | A   | G | N | F | K | T | M | P | K | L |
| tr A0A1G9ECK5 A0A1G9ECK5_9CLOT   | . . . . . Q . EYP  | CFMCARMRRG | A  | LY | KKAQEL   | G | CNKIALGHHF | NDVIET  | VM | LNLFY  | T | G   | N | F | K | T | M | P | K | L |   |
| tr A0A1I0GJZ8 A0A1I0GJZ8_9CLOT   | . . . . . R . EYP  | CYLCARMRRG | A  | LY | KKTQEL   | G | CNKIALGHHF | NDVIET  | TM | LNLFY  | T | G   | N | F | K | T | M | P | K | L |   |
| tr A0A1D7XIC3 A0A1D7XIC3_9CLOT   | . . . . . K . DYP  | CYLCARMRRG | S  | LY | NKAQDL   | G | CNKIALGHHY | NDVIET  | TL | LNLF   | Y | A   | G | N | F | K | T | M | P | K | L |
| tr A0A0F2Q1L1 A0A0F2Q1L1_9CLOT   | . . . . .          |            |    |    |          |   |            |         |    |        |   |     |   |   |   |   |   |   |   |   |   |

|                                  |                       |      |          |        |    |       |       |        |        |        |        |      |        |      |     |     |      |     |       |       |      |      |     |     |    |   |     |   |     |     |     |
|----------------------------------|-----------------------|------|----------|--------|----|-------|-------|--------|--------|--------|--------|------|--------|------|-----|-----|------|-----|-------|-------|------|------|-----|-----|----|---|-----|---|-----|-----|-----|
| tr A0A174A4G3 A0A174A4G3_9CLOT   | QDYP                  | CYL  | CARMRRG  | LY     | EK | AKEL  | CNK   | LALGH  | HY     | NDVIET | TM     | LN   | LY     | AG   | GN  | FKT | ML   | PKL |       |       |      |      |     |     |    |   |     |   |     |     |     |
| tr A6TTE5 A6TTE5_ALKMQ           | KEYP                  | CFM  | CAKMRRG  | LY     | QK | AQEL  | CNK   | LALGH  | HY     | NDVIET | TM     | LN   | LY     | AG   | GN  | FKT | ML   | PKL |       |       |      |      |     |     |    |   |     |   |     |     |     |
| tr U4KLZ0 U4KLZ0_ACHP3           | KENP                  | CYL  | CAKMRRG  | LY     | QK | AKEL  | CNK   | LALGH  | HY     | NDVIET | TM     | LN   | LY     | AG   | GN  | FKT | ML   | PKL |       |       |      |      |     |     |    |   |     |   |     |     |     |
| tr A0A0J8DD49 A0A0J8DD49_CLOCY   | KDYP                  | CYMC | ARMRRG   | LY     | SK | AKEL  | CNK   | LALGH  | HY     | NDVIET | TM     | LN   | LY     | AG   | GN  | FKT | ML   | PKL |       |       |      |      |     |     |    |   |     |   |     |     |     |
| tr I7LJ37 I7LJ37_9CLOT           | KDYP                  | CYMC | ARMRRG   | LY     | NK | AKEL  | CNK   | LALGH  | HY     | NDVIET | TM     | LN   | LY     | AG   | GN  | FKT | ML   | PKL |       |       |      |      |     |     |    |   |     |   |     |     |     |
| tr A0A2N1Q0A1 A0A2N1Q0A1_9BACT   | KENP                  | CYMC | ARMRRG   | LY     | QK | AKEL  | CNK   | LALGH  | HY     | NDVIET | TM     | LN   | LY     | AG   | GN  | FKT | ML   | PKL |       |       |      |      |     |     |    |   |     |   |     |     |     |
| tr A0A2X2L491 A0A2X2L491_9FUSO   | KDYP                  | CYMC | AKMRRG   | LY     | SK | ATEL  | CNK   | LALGH  | HY     | DDVVET | TM     | MS   | MFY    | MG   | GK  | FET | ML   | PKL |       |       |      |      |     |     |    |   |     |   |     |     |     |
| tr A0A1M4M946 A0A1M4M946_9FIRM   | QDYP                  | CYMC | ARMRRG   | LY     | NK | TKE   | L     | CNK    | LALGH  | HY     | NDVIET | TM   | LN     | LY   | AG  | GN  | FKT  | ML  | PKL   |       |      |      |     |     |    |   |     |   |     |     |     |
| tr A0A1H3RJ2V2 A0A1H3RJ2V2_9FIRM | KDYP                  | CYMC | ARMRRG   | LY     | GK | TKE   | L     | CNK    | LALGH  | HY     | NDVIET | TM   | LN     | LY   | AG  | GN  | FKT  | ML  | PKL   |       |      |      |     |     |    |   |     |   |     |     |     |
| tr J4UUAU8 J4UUAU8_9FIRM         | GDYP                  | CYMC | AKMRRG   | LY     | NI | AEL   | K     | CNK    | LALGH  | HY     | NDVIET | TM   | LN     | LY   | AG  | GN  | FKT  | ML  | PKL   |       |      |      |     |     |    |   |     |   |     |     |     |
| tr A8MG47 A8MG47_ALKOO           | KEYP                  | CFM  | CAKMRRG  | LY     | QK | AQEL  | CNK   | LALGH  | HY     | NDVVET | TM     | LN   | LY     | AG   | GN  | FKT | ML   | PKL |       |       |      |      |     |     |    |   |     |   |     |     |     |
| tr J6H3Q8 J6H3Q8_9FIRM           | GDYP                  | CYMC | AKMRRG   | LY     | NI | ARSL  | D     | CNK    | LALGH  | HY     | NDVIET | TM   | LN     | LY   | AG  | GN  | FKT  | ML  | PKL   |       |      |      |     |     |    |   |     |   |     |     |     |
| tr A0A1H5WXD0 A0A1H5WXD0_9CLOT   | KDYP                  | CYMC | ARMRRG   | LY     | NK | AKEL  | CNK   | LALGH  | HY     | NDVIET | TM     | LN   | LY     | AG   | GN  | FKT | ML   | PKL |       |       |      |      |     |     |    |   |     |   |     |     |     |
| tr A0A1F8UHH3 A0A1F8UHH3_9FIRM   | SDYP                  | CYL  | CARMRRG  | LY     | LK | AKEL  | CNK   | LALGH  | HY     | DDVIET | TM     | LN   | LY     | AG   | GN  | FKT | ML   | PKL |       |       |      |      |     |     |    |   |     |   |     |     |     |
| tr D1AIH2 D1AIH2_SEBTE           | KDYP                  | CYMC | AKMRRG   | LY     | TK | AVSL  | G     | CNK    | LALGH  | HY     | DDVAET | TM   | LM     | SMF  | QMS | KY  | ET   | ML  | PKL   |       |      |      |     |     |    |   |     |   |     |     |     |
| tr A0A1COADV0 A0A1COADV0_9FIRM   | SDYP                  | CYMC | AKMRRG   | LY     | NI | ATSL  | N     | CNK    | LALGH  | HY     | DDVIET | TM   | LN     | LY   | AG  | GN  | FKT  | ML  | PKL   |       |      |      |     |     |    |   |     |   |     |     |     |
| tr A0A1K1NPP9 A0A1K1NPP9_9BACT   | ASAPVPAVSTAGAIAGSKKPA | CFL  | CSWQRK   | QF     | NL | AQEL  | N     | CTK    | IAFGHH | QD     | I      | HTAL | MN     | LT   | FQ  | G   | H    | F   | T     | MPAKL |      |      |     |     |    |   |     |   |     |     |     |
| tr A0A1H8CKM7 A0A1H8CKM7_9BACT   | ..LAEQSSIKRKQ         | QF   | ..LAEQ   | EL     | G  | CNK   | LALGH | HY     | QD     | I      | HTAL   | MN   | LT     | FQ   | G   | H   | F    | T   | MPAKL |       |      |      |     |     |    |   |     |   |     |     |     |
| tr X8GV28 X8GV28_9FIRM           | ..E.IENP              | CYL  | CARMRRG  | LY     | AK | AREL  | CNK   | LALGH  | HY     | DDVIET | TM     | LM   | GM     | LY   | GQ  | I   | Q    | T   | M     | PKV   |      |      |     |     |    |   |     |   |     |     |     |
| tr A0A173V180 A0A173V180_9FIRM   | ..V.DKNP              | CYL  | CARMRRG  | LY     | SK | AKEL  | CNK   | LALGH  | HY     | DDVIET | TM     | LM   | GM     | LY   | GQ  | I   | Q    | T   | M     | PKV   |      |      |     |     |    |   |     |   |     |     |     |
| tr R5VBQ7 R5VBQ7_9FIRM           | ..I.TDSP              | CYL  | CARMRRG  | LY     | SK | AREL  | CNK   | LALGH  | HY     | DDVIET | TM     | LM   | GM     | LY   | GQ  | I   | Q    | T   | M     | PKV   |      |      |     |     |    |   |     |   |     |     |     |
| tr A0A1Y4HTK3 A0A1Y4HTK3_9FIRM   | ..A.EKSP              | CYL  | CARMRRG  | LY     | KH | ARAL  | CNK   | LALGH  | HY     | DDVIET | TM     | LM   | SM     | LY   | GA  | E   | M    | T   | M     | PKV   |      |      |     |     |    |   |     |   |     |     |     |
| tr A0A0J0TV39 A0A0J0TV39_PAESO   | ..R.K..EKNP           | CSL  | CANLRRG  | ALN    | DN | AKEL  | CNK   | VALGHH | K      | DDAVET | FL     | MS   | MFY    | EG   | RS  | CF  | S    | P   | K     | T     |      |      |     |     |    |   |     |   |     |     |     |
| tr R9T2S6 R9T2S6_9FIRM           | ..ENSP                | CYL  | CARMRRG  | LY     | SK | AREL  | CNK   | LALGH  | HY     | DDVIET | TM     | LM   | GM     | LY   | GA  | Q   | V    | T   | M     | PKV   |      |      |     |     |    |   |     |   |     |     |     |
| tr A0A2U0UGL2 A0A2U0UGL2_9BACE   | ..TESP                | CYL  | CARMRRG  | LY     | SK | AREL  | CNK   | LALGH  | HY     | DDVIET | TM     | LM   | GM     | LY   | GA  | Q   | V    | T   | M     | PKV   |      |      |     |     |    |   |     |   |     |     |     |
| tr A0A2P4V576 A0A2P4V576_CAERE   | ..PGLRSI              | CAF  | CSRMKRG  | LA     | AA | AQYHN | N     | V      | LAMGQH | L      | DDLAES | FF   | IA     | AF   | QNG | N   | L    | S   | T     | M     | KAQY |      |     |     |    |   |     |   |     |     |     |
| tr A0A158QJP7 A0A158QJP7_HAEP    | ..NNVRSI              | CAF  | CSRMKRG  | LA     | AA | AQYHN | N     | V      | LAMGQH | L      | DDLAES | FF   | IA     | AF   | QNG | N   | L    | S   | T     | M     | KAQY |      |     |     |    |   |     |   |     |     |     |
| tr A0A0N5AD38 A0A0N5AD38_9BILA   | ..PKCRSI              | CGY  | CSRMKRG  | LA     | AA | AQYHN | N     | V      | LAMGQH | L      | DDLAES | FF   | IA     | AF   | QNG | N   | L    | S   | T     | M     | KAQY |      |     |     |    |   |     |   |     |     |     |
| tr A0A1I7ZGR2 A0A1I7ZGR2_9BILA   | ..KECRSI              | CGF  | CSRMKRG  | LA     | AA | AQYHN | N     | V      | LAMGQH | L      | DDLAES | FF   | IA     | AF   | QNG | N   | L    | S   | T     | M     | KAQY |      |     |     |    |   |     |   |     |     |     |
| tr H3FCD7 H3FCD7_PRIPA           | ..KNLRSI              | CAF  | CSRMKRG  | LA     | AA | AQYHN | N     | V      | LAMGQH | L      | DDLAES | FF   | IA     | AF   | QNG | N   | L    | S   | T     | M     | KAQY |      |     |     |    |   |     |   |     |     |     |
| tr A0A0R3SHK2 A0A0R3SHK2_HYMDI   | ..DQCSSI              | CSF  | CSRMKRG  | RIY    | AA | ALKH  | G     | N      | V      | I      | ALGQH  | L    | DDLAES | FF   | MS  | CF  | H    | N   | G     | L     | M    | KAHY |     |     |    |   |     |   |     |     |     |
| tr A0A1E1XBM3 A0A1E1XBM3_9ACAR   | ..PECTSI              | CSF  | CSRMKRG  | RIY    | AC | AREL  | G     | N      | V      | I      | ALGQH  | L    | DDLAES | FF   | MS  | CF  | H    | N   | G     | L     | M    | KAHY |     |     |    |   |     |   |     |     |     |
| tr R6Z006 R6Z006_9FIRM           | ..H.MK..GDQLP         | CS   | CSRMKKA  | AIN    | RV | ANEL  | G     | F      | K      | V      | I      | FAHN | DD     | DAET | LI  | MN  | TH   | GR  | L     | A     | T    | F    | S   | PKM |    |   |     |   |     |     |     |
| tr A0A1V5UJ98 A0A1V5UJ98_9BACT   | ..Q.KEKQNLPLPL        | CS   | CSRMKKA  | AIN    | EV | AKKI  | G     | A      | N      | K      | V      | A    | F      | A    | H   | DD  | DAET | LI  | MN    | TH    | GR   | L    | A   | T   | F  | S | PKM |   |     |     |     |
| tr A0A1V6IJD5 A0A1V6IJD5_9BACT   | ..Q.KEKQGLPLPL        | CS   | CSRMKKA  | AIN    | EV | ANKL  | G     | A      | N      | K      | V      | A    | F      | A    | H   | DD  | DAET | LI  | MN    | TH    | GR   | L    | A   | T   | F  | S | PKM |   |     |     |     |
| tr A0A1V6FCC4 A0A1V6FCC4_9BACT   | ..Q.QTKQGLAKPL        | CS   | CSRMKKA  | AIN    | EV | AKKI  | G     | A      | N      | K      | V      | A    | F      | A    | H   | DD  | DAET | LI  | MN    | TH    | GR   | L    | A   | T   | F  | S | PKM |   |     |     |     |
| tr A0A1V5HTP1 A0A1V5HTP1_9BACT   | ..H.QK..GKHIP         | CS   | CSRMKKA  | AMN    | SV | AHRL  | G     | A      | N      | K      | V      | A    | F      | A    | H   | DD  | DAET | LI  | MN    | TH    | GR   | L    | A   | T   | F  | S | PKM |   |     |     |     |
| tr R7DSC3 R7DSC3_9FIRM           | ..H.KK..DKLP          | CS   | CSRMKKA  | AIN    | LS | AHQH  | G     | A      | N      | K      | V      | A    | F      | A    | H   | DD  | DAET | LI  | MN    | TH    | GR   | L    | A   | T   | F  | S | PKM |   |     |     |     |
| tr A0A1Y2CT79 A0A1Y2CT79_9FUNG   | ..PNQP                | CFM  | CAKMRRG  | LY     | RK | AKEL  | CNK   | LALGH  | HY     | DD     | I      | ET   | TM     | LN   | IF  | Y   | AG   | C   | Y     | K     | T    | M    | PKV |     |    |   |     |   |     |     |     |
| tr W8JGB0 W8JGB0_9CHLA           | ..PEVLE               | CYT  | CSQVRRRL | LF     | QA | AEI   | G     | A      | S      | A      | V      | F    | G      | H    | HH  | DD  | I    | ET  | TM    | LN    | IF   | Y    | AG  | C   | Y  | K | T   | M | PKV |     |     |
| tr G4NP34 G4NP34_CHLT4           | ..TENPE               | CYT  | CSRI     | RRRL   | LF | DT    | AKAV  | G      | A      | T      | A      | V    | F      | G    | H   | HH  | DD   | I   | ET    | TM    | LN   | IF   | Y   | AG  | C  | Y | K   | T | M   | PKV |     |
| tr A0A2A4YC14 A0A2A4YC14_9BACT   | ..IDTLE               | CYT  | CSRI     | RRRL   | LF | AA    | AKKL  | G      | A      | T      | A      | V    | F      | G    | H   | HH  | DD   | I   | ET    | TM    | LN   | IF   | Y   | AG  | C  | Y | K   | T | M   | PKV |     |
| tr A0A0C1H3W6 A0A0C1H3W6_9BACT   | ..LEKLE               | CYS  | CSRRER   | RL     | LF | EA    | AKSL  | G      | I      | T      | T      | A    | F      | G    | H   | HH  | DD   | I   | ET    | TM    | LN   | IF   | Y   | AG  | C  | Y | K   | T | M   | PKV |     |
| tr A0A0C1CA75 A0A0C1CA75_9BACT   | ..LESLE               | CY   | G        | CSRRER | RL | LF    | EA    | AKSL   | G      | I      | T      | T    | A      | F    | G   | H   | HH   | DD  | I     | ET    | TM   | LN   | IF  | Y   | AG | C | Y   | K | T   | M   | PKV |
| tr Q5L5X2 Q5L5X2_CHLAB           | ..PEVPE               | CYS  | CSQVRR   | RL     | LF | QA    | AKDV  | G      | A      | T      | A      | V    | F      | G    | H   | HH  | DD   | I   | ET    | TM    | LN   | IF   | Y   | AG  | C  | Y | K   | T | M   | PKV |     |
| tr A0A1F8JPS7 A0A1F8JPS7_9BACT   | ..REDLE               | CYS  | CSRRER   | RL     | LF | NA    | AKKV  | G      | A      | T      | T      | A    | F      | G    | H   | HH  | DD   | I   | ET    | TM    | LN   | IF   | Y   | AG  | C  | Y | K   | T | M   | PKV |     |
| tr A0A090D241 A0A090D241_9BACT   | ..LEGLE               | CY   | G        | CSRRER | RL | LF    | NA    | AKKV   | G      | A      | T      | T    | A      | F    | G   | H   | HH   | DD  | I     | ET    | TM   | LN   | IF  | Y   | AG | C | Y   | K | T   | M   | PKV |
| tr A0A2A4X7F6 A0A2A4X7F6_9BACT   | ..EDQLE               | CYR  | CSRRER   | RL     | LF | NA    | AKKV  | G      | A      | T      | T      | A    | F      | G    | H   | HH  | DD   | I   | ET    | TM    | LN   | IF   | Y   | AG  | C  | Y | K   | T | M   | PKV |     |
| tr A0A212KNQ6 A0A212KNQ6_9CHLA   | ..REKLE               | CYR  | CSRRER   | RL     | LF | NA    | AKKV  | G      | A      | T      | T      | A    | F      | G    | H   | HH  | DD   | I   | ET    | TM    | LN   | IF   | Y   | AG  | C  | Y | K   | T | M   | PKV |     |
| tr A0A2HOVXW5 A0A2HOVXW5_9BACT   | ..LEDLE               | CYR  | CSRRER   | KL     | IF | DA    | AKKV  | G      | A      | T      | T      | A    | F      | G    | H   | HH  | DD   | I   | ET    | TM    | LN   | IF   | Y   | AG  | C  | Y | K   | T | M   | PKV |     |
| tr A0A1F8J4G6 A0A1F8J4G6_9BACT   | ..KDTLE               | CYR  | CSRRER   | KL     | IF | DA    | AKKV  | G      | A      | T      | T      | A    | F      | G    | H   | HH  | DD   | I   | ET    | TM    | LN   | IF   | Y   | AG  | C  | Y | K   | T | M   | PKV |     |
| tr A0A0C1HRT1 A0A0C1HRT1_9BACT   | ..LETLE               | CYS  | CSRRER   | SL     | LF | EA    | AKSV  | G      | A      | T      | T      | A    | F      | G    | H   | HH  | DD   | I   | ET    | TM    | LN   | IF   | Y   | AG  | C  | Y | K   | T | M   | PKV |     |
| tr A0A2E3LYW0 A0A2E3LYW0_9BACT   | ..LDTLE               | CYS  | CSRRER   | KL     | IF | DA    | AKKV  | G      | A      | T      | T      | A    | F      | G    | H   | HH  | DD   | I   | ET    | TM    | LN   | IF   | Y   | AG  | C  | Y | K   | T | M   | PKV |     |
| tr A0A078LBF5 A0A078LBF5_9CHLA   | ..LETLE               | CYS  | CSRRER   | SL     | LF | EA    | AKSV  | G      | A      | T      | T      | A    | F      | G    | H   | HH  | DD   | I   | ET    | TM    | LN   | IF   | Y   | AG  | C  | Y | K   | T | M   | PKV |     |
| tr A0A1F8JX30 A0A1F8JX30_9BACT   | ..IKKTN               | CYS  | CSRRER   | KL     | IF | EA    | AKSV  | G      | A      | T      | T      | A    | F      | G    | H   | HH  | DD   | I   | ET    | TM    | LN   | IF   | Y   | AG  | C  | Y | K   | T | M   | PKV |     |
| tr A0A2HOVVF5 A0A2HOVVF5_9BACT   | ..LEDLE               | CYS  | CSRRER   | KL     | IF | DA    | AKKV  | G      | A      | T      | T      | A    | F      | G    | H   | HH  | DD   | I   | ET    | TM    | LN   | IF   | Y   | AG  | C  | Y | K   | T | M   | PKV |     |
| tr T5K7U9 T5K7U9_9CHLA           | ..PETPE               | CYS  | CSQVRR   | RL     | LF | QA    | AKDV  | G      | A      | T      | A      | V    | F      | G    | H   | HH  | DD   | I   | ET    | TM    | LN   | IF   | Y   | AG  | C  | Y | K   | T | M   | PKV |     |
| tr A0A2H9SVY0 A0A2H9SVY0_9BACT   | ..LESLE               | CYS  | CSRRER   | RL     | LF | DA    | AKSV  | G      | A      | T      | T      | A    | F      | G    | H   | HH  | DD   | I   | ET    | TM    | LN   | IF   | Y   | AG  | C  | Y | K   | T | M   | PKV |     |
| tr V8TPD5 V8TPD5_9CHLA           | ..PETPE               | CYS  | CSQARR   | RL     | LF | QA    | AKDV  | G      | A      | T      | A      | V    | F      | G    | H   | HH  | DD   | I   | ET    | TM    | LN   | IF   | Y   | AG  | C  | Y | K   | T | M   | PKV |     |
| tr Q254M9 Q254M9_CHLFF           | ..PEVPE               | CYS  | CSQVRR   | RL     | LF | QA    | AKDV  | G      | A      | T      | A      | V    | F      | G    | H   | HH  | DD   | I   | ET    | TM    | LN   | IF   | Y   | AG  | C  | Y | K   | T | M   | PKV |     |
| tr A0A173E038 A0A173E038_9CHLA   | ..PEVLE               | CYS  | CSQVRR   | RL     | LF | QA    | AKDV  | G      | A      | T      | A      | V    | F      | G    | H   | HH  | DD   | I   | ET    | TM    | LN   | IF   | Y   | AG  | C  | Y | K   | T | M   | PKV |     |
| tr A0A1A9HVJ8 A0A1A9HVJ8_9CHLA   | ..PDTPE               | CYP  | CSQVRR   | RL     | LF | QA    | AKDV  | G      | A      | T      | A      | V    | F      | G    | H   | HH  | DD   | I   | ET    | TM    | LN   | IF   | Y   | AG  | C  | Y | K   | T | M   | PKV |     |
| tr F8L6X1 F8L6X1_SIMNZ           | ..RETLS               | CYR  | CSRRER   | KL     | IF | EA    | AKKV  | G      | A      | T      | T      | A    | F      | G    | H   | HH  | DD   | I   | ET    | TM    | LN   | IF   | Y   | AG  | C  | Y | K   | T | M   | PKV |     |
| tr A0A0U5JAB3 A0A0U5JAB3_9BACT   | ..LETLE               | CYS  | CSRRER   | RL     | LF | DA    | AKKV  | G      | A      | T      | T      | A    | F      | G    | H   | HH  | DD   | I   | ET    | TM    | LN   | IF   | Y   | AG  | C  | Y | K   | T | M   | PKV |     |
| tr A0A1F8JQJ4 A0A1F8JQJ4_9BACT   | ..EGGLE               | CYR  | CSRRER   | KL     | IF | EA    | AKKV  | G      | A      | T      | T      | A    | F      | G    | H   | HH  | DD   | I   | ET    | TM    | LN   | IF   | Y   | AG  | C  | Y | K   | T | M   | PKV |     |
| tr Q9Z8S7 Q9Z8S7_CHLNP           | ..PETPE               | CYP  | CSQARR   | RL     | LF | QA    | AKDV  | G      | A      | T      | A      | V    | F      | G    | H   | HH  | DD   | I   | ET    | TM    | LN   | IF   | Y   | AG  | C  | Y | K   | T | M   | PKV |     |
| tr A0A2R8FAY6 A0A2R8FAY6_9CHLA   | ..SETPE               | CYP  | CSQARR   | RL     | LF | QA    | AKDV  | G      | A      | T      | A      | V    | F      | G    | H   | HH  | DD   | I   | ET    | TM    | LN   | IF   | Y   | AG  | C  | Y | K   | T | M   | PKV |     |
| tr D6VXT5 D6VXT5_WADWC           | ..LETLE               | CYS  | CSRRER   | KL     | IF | EA    | AKKV  | G      | A      | T      | T      | A    | F      | G    | H   | HH  | DD   | I   | ET    | TM    | LN   | IF   | Y   | AG  | C  | Y | K   | T | M   | PKV |     |
| tr A0A1M3CQO7 A0A1M3CQO7_9CHLA   | ..LDTLE               | CYS  | CSRRER   |        |    |       |       |        |        |        |        |      |        |      |     |     |      |     |       |       |      |      |     |     |    |   |     |   |     |     |     |



|                                |                                                                                                                                                   |
|--------------------------------|---------------------------------------------------------------------------------------------------------------------------------------------------|
| tr A0A256YLA3 A0A256YLA3_9CREN | . . . . . R . E K . K L . P Y L P . C S Y C G V F R R Y L L N . K V A R E M G T V L A T A H N L D D I I Q T Y M M N I I K N S W D K V A R L A P   |
| tr A0A2D6R8H3 A0A2D6R8H3_9ARCH | . . . . . N . K . . G T . K K K P . C N V C G V W R R Y S L N . K Y A R K F G A T K V V T G H N L D D E A Q V I L M N I F K A N T K L A G R I G P |
| tr V9IMM0 V9IMM0_APICE         | . . . . . D . R G G E G V D A S G A C S F C D R A T R A Q L Y . A I A K R H N Y N V L A V G Q H L D D L T E G F L V S V F H G K L R T M K A H Y   |

124995

tr|A0A2P8VLK6|A0A2P8VLK6\_9ENTR  
tr|A0A0H3I9P2|A0A0H3I9P2\_PECSS  
tr|A0A2X2A3V8|A0A2X2A3V8\_9GAMM  
tr|A0A1K1LJ61|A0A1K1LJ61\_9PROT  
tr|A0A154U724|A0A154U724\_NEIFL  
tr|A0A1V2DX27|A0A1V2DX27\_9ALTE  
tr|W0HXP0|W0HXP0\_9GAMM  
tr|A0A265QRM6|A0A265QRM6\_AGGAC  
tr|A0A1B6B2J0|A0A1B6B2J0\_ALCFA  
tr|A0A2U8FW74|A0A2U8FW74\_9BURK  
tr|A0A246J2Z4|A0A246J2Z4\_9BURK  
tr|A0A0U3KA27|A0A0U3KA27\_9BURK  
tr|A0A099LFJ1|A0A099LFJ1\_9GAMM  
tr|A0A2N4XR11|A0A2N4XR11\_9RHO  
tr|C6X8M4|C6X8M4\_METGS  
tr|A0A1I2G6V5|A0A1I2G6V5\_9BURK  
tr|F7RWZ5|F7RWZ5\_9GAMM  
tr|A0A1C6LTR8|A0A1C6LTR8\_9NEIS  
tr|A0A1F4M1Z4|A0A1F4M1Z4\_9BURK  
tr|A0A1D8J3B6|A0A1D8J3B6\_9BURK  
tr|A0A2A2AP57|A0A2A2AP57\_9BURK  
tr|A0A0K6GZP4|A0A0K6GZP4\_9NEIS  
tr|A0A0S9F0W6|A0A0S9F0W6\_9BURK  
tr|A0A1N7A9F0|A0A1N7A9F0\_9GAMM  
tr|A0A1F4G480|A0A1F4G480\_9BURK  
tr|A0A2S0P7B7|A0A2S0P7B7\_9NEIS  
tr|K2BEF1|K2BEF1\_9ZZZZ  
tr|A0A1D9GWF3|A0A1D9GWF3\_9BURK  
tr|A0A163C6B3|A0A163C6B3\_9NEIS  
tr|D2TZ97|D2TZ97\_9GAMM  
tr|A0A0P0MIV0|A0A0P0MIV0\_9BURK  
tr|L2EN66|L2EN66\_9BURK  
tr|A0A0P1D2N2|A0A0P1D2N2\_9NEIS  
sp|Q12N51|TTCA\_SHEDO  
tr|A0A1U9JN14|A0A1U9JN14\_9NEIS  
tr|A0A1Y5D1A3|A0A1Y5D1A3\_9GAMM  
tr|A0A1L8MBV1|A0A1L8MBV1\_9ALTE  
tr|A0A080K7B7|A0A080K7B7\_9NEIS  
tr|A0A2N9X7G9|A0A2N9X7G9\_9NEIS  
tr|A0A248LMP6|A0A248LMP6\_9NEIS  
tr|G2IW96|G2IW96\_PSEUL  
tr|A0A136H2U1|A0A136H2U1\_9GAMM  
tr|A0A0M2V1O9|A0A0M2V1O9\_9GAMM  
tr|A0A0T9PB77|A0A0T9PB77\_9GAMM  
tr|A0A1I7MJA6|A0A1I7MJA6\_9GAMM  
sp|B1KFY6|TTCA\_SHEWM  
tr|A0A1H8PUT2|A0A1H8PUT2\_9BURK  
sp|Q15U56|TTCA\_PSEAG  
sp|A1VJK9|TTCA\_POLNA  
tr|A0A1X0W1Y8|A0A1X0W1Y8\_9GAMM  
tr|A0A0A3BCC4|A0A0A3BCC4\_9PAST  
tr|A0A0C3QY96|A0A0C3QY96\_9GAMM  
tr|A0A1Z9XC69|A0A1Z9XC69\_9ALTE  
tr|A0A2D7GR50|A0A2D7GR50\_ALTSX  
tr|A0A1F4GZB8|A0A1F4GZB8\_9BURK  
tr|A0A2M8RY88|A0A2M8RY88\_9PAST  
tr|A0A1X3DH74|A0A1X3DH74\_9NEIS  
tr|A0A1R4IF13|A0A1R4IF13\_9VIBR  
tr|A0A0H4HWD6|A0A0H4HWD6\_HAEDC  
sp|A8FVF7|TTCA\_SHESH  
tr|A0A1B3LJ13|A0A1B3LJ13\_9PROT  
tr|H0PWW8|H0PWW8\_9RHO  
tr|A0A2G3K5C5|A0A2G3K5C5\_9BURK  
tr|ROE3E6|ROE3E6\_RALPI  
tr|A0A2S0N4V1|A0A2S0N4V1\_9BURK  
tr|A0A167IKV2|A0A167IKV2\_9BURK  
tr|N6Y5V6|N6Y5V6\_9RHO  
tr|A0A151JF95|A0A151JF95\_9VIBR  
tr|A0A0F4PF88|A0A0F4PF88\_9VIBR  
tr|A0A2I5T7N7|A0A2I5T7N7\_SER53  
tr|A0A2M8S5Q1|A0A2M8S5Q1\_9PAST  
tr|A0A1D9BE07|A0A1D9BE07\_9NEIS  
tr|A0A0L7T4H2|A0A0L7T4H2\_9GAMM  
tr|A0A1B7L7X3|A0A1B7L7X3\_9ENTR  
sp|Q013K3|TTCA\_HAES1  
tr|A0A257CR00|A0A257CR00\_9BURK  
tr|W0Q2T6|W0Q2T6\_9PAST  
tr|A0A1B7UI15|A0A1B7UI15\_9GAMM  
tr|A0A0N0GL12|A0A0N0GL12\_9NEIS  
tr|A0A2E3M490|A0A2E3M490\_9RICK  
tr|A0A011NQM2|A0A011NQM2\_9PROT  
tr|A0A109RUW1|A0A109RUW1\_9BURK  
tr|A0A1S8YQ17|A0A1S8YQ17\_9ENTR  
tr|A0A068Z3J7|A0A068Z3J7\_9GAMM  
tr|A0A085GT12|A0A085GT12\_HAFAL  
tr|A0A1X3RLS0|A0A1X3RLS0\_9GAMM  
tr|A0A2U0SNX6|A0A2U0SNX6\_9PAST  
tr|A0A1A9AYD0|A0A1A9AYD0\_PLESH  
tr|A0A2T7SXT3|A0A2T7SXT3\_9BURK  
tr|I3DD15|I3DD15\_HAEPH  
tr|A0A2D9KIY0|A0A2D9KIY0\_9ALTE  
sp|Q65TL6|TTCA\_MANSN  
tr|A0A2H9TAV4|A0A2H9TAV4\_9ZZZZ  
tr|A0A1E7ZF70|A0A1E7ZF70\_9ALTE  
tr|A0A2G8EIK3|A0A2G8EIK3\_9GAMM  
tr|A0A2G8C3Z3|A0A2G8C3Z3\_9GAMM  
tr|A0A285J8N9|A0A285J8N9\_9GAMM  
tr|E0LVH6|E0LVH6\_9GAMM  
tr|A0A2J9E917|A0A2J9E917\_9GAMM  
tr|I3DI62|I3DI62\_9PAST  
tr|A0A0H3DTH0|A0A0H3DTH0\_EDWTF  
tr|A0A0U5L641|A0A0U5L641\_9GAMM

180 190 200 210  
MSD...D...GKHI...VIRPLAY...CR...EKDI...QR...FADAK...AF...PII...P...N...L...CGSQ...  
MSD...D...GKHI...VIRPLAY...CR...EKDI...ER...FSQAK...GF...PII...P...N...L...CGSQ...  
MSD...D...GKHI...VIRPLAY...CR...EKDI...ER...FSEAR...QY...PII...P...N...L...CGSQ...  
MSD...D...GKHI...VIRPLAY...CR...EKDI...ER...FAEAK...GF...PII...P...N...L...CGSQ...  
VSD...D...GRHI...VIRPLAY...CK...EKDL...EAYARME...DF...PII...P...N...L...CGSQ...  
VSD...N...GEHI...VIRPLAY...VK...EKDL...IKYAE...LK...QF...PII...P...N...L...CGSQ...  
HSD...D...GRNT...VIRPLVY...AR...EKDI...AR...YAALR...RF...PII...P...N...L...CGSQ...  
MSD...D...GKHI...VIRPLAY...CR...EKDI...AR...FAQAR...QF...PII...P...N...L...CGSQ...  
ISD...D...GKQI...LIRPLAY...CK...EKDI...EKYAVAK...AF...PII...P...N...L...CGSQ...  
MSD...N...GEHI...VIRPLAY...VP...EKDL...IAYAKLK...EF...PII...P...N...L...CGSQ...  
VTD...N...GEHV...VIRPMAY...CR...EKDL...AKYAEHR...EF...PII...P...N...L...CGSQ...  
VSD...D...GKNV...VIRPLAY...VK...EKDL...ERWAEHR...AF...PII...P...N...L...CGSQ...  
IAD...D...GENV...VIRPLAY...VR...PD...KKYAAAM...QF...PII...P...N...L...CGSQ...  
VSD...N...GEHV...VIRPLAY...CK...EKQI...KQYAKLK...QF...PII...P...N...L...CGSQ...  
LSD...D...GQHM...VIRPLAY...CA...EKDV...AKYARAM...DF...PII...P...N...L...CGSQ...  
STN...R...GEFM...VIRPLAY...CA...EKDI...AA...YARGM...EF...PII...P...D...L...CGSQ...  
VSD...D...GRHV...VIRPLAY...VP...EKD...TARWAQHR...QF...PII...P...N...L...CGSQ...  
VSD...N...GEHV...VIRPLAY...AR...EKDI...EQYSGSM...NY...PII...P...N...L...CGSQ...  
VSD...D...GKHI...VIRPLAY...CR...EKDI...ERYATLR...EF...PII...P...N...L...CGSQ...  
VSD...D...GGHI...VIRPLNVA...EKDL...TRWAHR...EF...PII...P...S...L...CGSQ...  
VSD...D...GKHV...VIRPLCYVP...EKDT...VRWAQYQ...NF...PII...P...N...L...CGSQ...  
VSD...D...GKHV...VIRPLAY...IP...EKDT...RQWAEYQ...QF...PII...P...N...L...CGSQ...  
VSD...N...GKHI...VIRPLAY...CR...EKDL...ER...YARLR...AF...PII...P...N...L...CGSQ...  
VSD...D...GRHV...VIRPLAY...VA...EKDT...ARWSAHR...DF...PII...P...N...L...CGSQ...  
LSD...D...GANV...VIRPMAY...CR...EKDL...EAYANLK...EF...PII...P...N...L...CGSQ...  
VTD...N...GEHV...VIRPLAY...CR...EKDL...AR...YAEHR...EF...PII...P...N...L...CGSQ...  
ISD...D...RRHI...VIRPLAY...CR...EKDL...IR...YAEQK...AF...PII...P...N...L...CGSQ...  
LSD...N...KKHI...VIRPLTYCQ...EKDI...AL...FSKEM...SF...PVT...P...T...L...CGSQ...  
ATD...D...GQHI...VIRPLAY...CP...EKDI...AA...YARAM...EF...PII...P...N...L...CGSQ...  
VSD...D...GRHM...VIRPLAY...CR...EKDL...ER...YAAIK...AF...PII...P...N...L...CGSQ...  
MSD...N...GKHI...VIRPLAY...CR...EKDI...AHYAKIK...EF...PII...P...N...L...CGSQ...  
LSD...N...GEFM...VIRPLAHVA...EADL...TRWAEHR...QF...PII...P...T...L...CGSQ...  
ATD...D...GQHI...VIRPLAY...CA...EKDI...AS...YARAM...AF...PII...P...N...L...CGSQ...  
VSD...N...GEHI...VIRPLAY...VK...EKDL...IKYAE...LK...EF...PII...P...N...L...CGSQ...  
LSD...D...GANM...VIRPLAY...CR...EKDI...AEYAKFK...EF...PII...P...N...L...CGSQ...  
LSD...D...GKHM...VIRPLAY...CR...EKDL...ER...YAEQR...EF...PII...P...N...L...CGSQ...  
VSD...N...GEHV...VIRPLAFCK...EALL...IQYAE...LK...QF...PII...P...N...L...CDSQ...  
VSD...N...GEHI...VIRPLAY...CT...EKDI...EKYSQAA...EF...PII...P...N...L...CGSQ...  
LSD...N...GEHI...IIRPLAY...VK...EKDL...IR...YAQML...EF...PII...P...N...L...CGSQ...  
LSD...N...GEHI...IIRPLAY...VK...EKDL...IR...FAQTQ...NF...PII...P...N...L...CGSQ...  
LSD...N...GKHV...VIRPLAY...CR...EKDI...ER...YAGLR...EF...PII...P...N...L...CGSQ...  
VSD...D...GKHM...VIRPLAY...CR...EKDL...ER...YATLR...EF...PII...P...N...L...CGSQ...  
VSD...D...GKNT...VIRPLAY...AR...EKDI...EAYAE...LK...GF...PII...P...N...L...CGSQ...  
ISD...N...GEHI...VIRPLAY...CK...EKDI...EKYQAR...QF...PII...P...N...L...CGSQ...  
MSD...D...GKHV...VIRPLAY...CR...EKDI...ER...FAVIR...EY...PII...P...N...L...CGSQ...  
VSD...N...GKHV...IIRPLAY...TR...EKDI...VKYSDHM...DF...PII...P...N...L...CGSQ...  
LSD...D...GANM...VIRPLAY...AR...EKDI...AEYAE...LK...GF...PII...P...N...L...CGSQ...  
TAD...D...GENV...VIRPLAY...CR...EQDI...EKYAGKM...GF...PII...P...N...L...CGSQ...  
TSD...D...GENV...VIRPLAY...CA...EQDI...ADYSILS...GF...PII...P...N...L...CGSQ...  
VSD...D...GKNI...VIRPMAY...VT...EKDL...TRWAQVQ...DF...PII...P...T...L...CGSQ...  
MSD...D...GKHI...VIRPLAY...CR...EKDI...ER...FAIAR...GY...PII...P...N...L...CGSQ...  
ISD...D...GKQI...VIRPLAY...CK...EKDI...EKYAVAK...QF...PII...P...N...L...CGSQ...  
LSD...D...GANV...VIRPLAY...SR...EKDI...AEYAE...LK...AF...PII...P...N...L...CGSQ...  
VSD...N...GEHI...VIRPLAY...CT...ESDI...QYESTLS...DF...PII...P...N...L...CGSQ...  
VSD...N...GEHI...VIRPLAY...CT...ENDI...KVYSEAS...DF...PII...P...N...L...CGSQ...  
VSD...D...GRHV...VIRPLAFVS...EKDT...TRWAAQR...NF...PII...P...N...L...CGSQ...  
MSD...D...GKQI...VIRPLAY...CK...EKDI...EKYAAAK...EF...PII...P...N...L...CGSQ...  
VSD...N...GEHI...VIRPLAY...VK...EKDL...QR...YAE...LK...QF...PII...P...N...L...CGSQ...  
VSD...N...GEHV...VIRPLAY...CR...EKDI...IKFSAMR...EY...PII...P...N...L...CGSQ...  
ISD...D...AKHI...VIRPLAY...CK...EKDI...EKYAEAK...QF...PII...P...N...L...CGSQ...  
LSD...D...GANM...VIRPLAY...SR...EKDI...AEYAE...LK...AF...PII...P...N...L...CGSQ...  
VSD...D...GRHI...VIRPLAY...CT...ERDI...ERFARVM...AY...PII...P...N...L...CGSQ...  
VSD...N...GEHV...VIRPLAY...CT...ENDI...ARFARTM...EF...PII...P...N...L...CGSQ...  
VSD...D...GKHM...VIRPLAY...CR...EKDI...ER...YAGMR...QF...PII...P...T...L...CGSQ...  
ATD...N...GDHI...VIRPLAY...CA...EKDI...AS...YARAM...EF...PII...P...N...L...CGSQ...  
VSD...D...GKHV...VIRPLAFVT...EKDT...ARWAAQR...NF...PII...P...N...L...CGSQ...  
VSD...D...GKNV...VIRPMAY...VA...EKDL...SRWAEIR...EY...PII...P...T...L...CGSQ...  
VSD...D...GNHV...VIRPLAY...CT...EADI...ARFARM...DF...PII...P...N...L...CGSQ...  
VSD...N...GEHV...VIRPLAY...CR...EKDI...IKYADMV...GY...PII...P...N...L...CGSQ...  
VSD...N...GEHV...VIRPLAY...CR...EKDI...IKFSDMR...SY...PII...P...N...L...CGSQ...  
MSD...D...GKHV...VIRPLAY...CR...EKDI...ER...FADAR...QF...PII...P...N...L...CGSQ...  
LSD...D...GKQI...VIRPLAY...CK...EKDI...EKYSIAK...EF...PII...P...N...L...CGSQ...  
VSD...D...GKHV...VIRPLAY...CR...EKDI...VRYSEAK...GF...PII...P...N...L...CGSQ...  
MSD...D...GKHI...VIRPLAY...CR...EKDI...ER...FAIAR...EY...PII...P...N...L...CGSQ...  
MSD...D...GKHI...VIRPLAY...CR...EKDI...ER...FSTAK...AF...PII...P...N...L...CGSQ...  
ISD...D...GKQI...VIRPLAY...CK...EKDI...EKYAVAK...QF...PII...P...N...L...CGSQ...  
TSD...N...GEFV...VIRPLAY...VA...EKDL...IRWAAHR...EF...PII...P...S...L...CGSQ...  
ISD...D...GKQI...VIRPLAY...CK...EKDI...IKYAEAK...QF...PII...P...N...L...CGSQ...  
QSD...N...GEHI...VIRPLAY...CR...EKDI...EKYSTAK...GF...PII...P...N...L...CGSQ...  
VSD...D...GRHV...VIRPLAY...CR...EKDI...IKYSEAR...GF...PII...P...N...L...CGSQ...  
VSD...N...GEHI...VIRPLAY...CT...EKDI...QRYS...DAV...EF...PII...P...N...L...CGSQ...  
VTD...D...GAHV...VIRPLSYCA...EADI...ARFARM...AY...PII...P...N...L...CGAQ...  
VSD...N...GKHV...VIRPLAY...CK...EKDI...VRYAEAR...EF...PII...P...N...L...CGSQ...  
MSD...D...GKHI...VIRPLAY...CR...EKDI...ER...FATAR...QF...PII...P...N...L...CGSQ...  
MSD...D...GKHV...VIRPLAY...CR...EKDI...ER...FAIAK...AF...PII...P...N...L...CGSQ...  
MSD...D...GKHI...VIRPLAY...CR...EKDI...ER...FAEAR...AF...PII...P...N...L...CGSQ...  
MSD...D...GKHV...VIRPLAY...CR...EKDI...ER...FAEAK...HF...PII...P...N...L...CGSQ...  
MSD...D...GKHI...VIRPLAY...CK...EKDI...EKYAMAK...AF...PII...P...N...L...CGSQ...  
VSD...D...GKHV...VIRPLAY...CR...EKDI...ER...FAEIR...EF...PII...P...N...L...CGSQ...  
VSD...N...GEFM...VIRPLAY...VA...EKDL...IRWAAHR...QF...PII...P...T...L...CGSQ...  
ISD...D...GKQI...VIRPLAY...CK...EKDI...EKYAEAK...QF...PII...P...N...L...CGSQ...  
VSD...D...GKHV...VIRPLAY...CN...EKDI...EKYAAV...EF...PII...P...N...L...CGSQ...  
VSD...D...GKQI...VIRPLAY...CK...EKDI...EKYAVAK...QF...PII...P...N...L...CGSQ...  
VSD...D...GQHM...VIRPLAY...CR...EKDI...ALYAKLM...DF...PII...P...N...L...CGSQ...  
VSD...N...GEHI...VIRPLAY...CS...EKDI...QKYS...DA...SF...PII...P...N...L...CGSQ...  
MSD...D...GKHI...VIRPLAY...CR...EKDI...ER...FATAR...QF...PII...P...N...L...CGSQ...  
MSD...D...GKHI...VIRPLAY...CR...EKDI...IRFSEAK...QF...PII...P...N...L...CGSQ...  
MSD...D...GKHI...VIRPLAY...CR...EKDI...IRF...AEAR...QY...PII...P...N...L...CGSQ...  
MSD...D...GKQI...VIRPLAY...CR...EKDI...IRFSDAR...QF...PII...P...N...L...CGSQ...  
MSD...D...GKHI...VIRPLAY...CR...EKDI...VRSEAR...KF...PII...P...N...L...CGSQ...  
ISD...D...GKQV...VIRPLAY...CK...EKDI...EKYAIK...QF...PII...P...N...L...CGSQ...  
MSD...D...GQHI...VIRPLAY...CR...EKDI...ER...FAAAK...AF...PII...P...N...L...CGSQ...  
MSD...D...GKQI...VIRPLAY...CR...EKDI...IRF...AEAR...QF...PII...P...N...L...CGSQ...



tr|A0A2N5EAD2|A0A2N5EAD2\_9GAMM  
tr|A0A1X1MR97|A0A1X1MR97\_9VIBR  
tr|A0A0U4V2L4|A0A0U4V2L4\_9GAMM  
tr|D2TAQ3|D2TAQ3\_ERWP6  
tr|A0A1H7QGZ9|A0A1H7QGZ9\_9GAMM  
tr|A0A1V3ITW9|A0A1V3ITW9\_9PAST  
tr|A0A1E5BFJ6|A0A1E5BFJ6\_9VIBR  
tr|A0A1J5KWL8|A0A1J5KWL8\_9VIBR  
tr|A0A2S0UY9|A0A2S0UY9\_9GAMM  
tr|A0A2T3I6F0|A0A2T3I6F0\_9GAMM  
tr|A0A1V3I034|A0A1V3I034\_9GAMM  
sp|A1SWS4|TTCA\_PSYIN  
tr|A0A066RUR5|A0A066RUR5\_9GAMM  
tr|A0A090IGU5|A0A090IGU5\_9GAMM  
tr|A0A2N1A2J9|A0A2N1A2J9\_9GAMM  
tr|MAU6L5|MAU6L5\_9GAMM  
tr|A0A2T4IDK9|A0A2T4IDK9\_9RHO  
tr|A0A290ZQX4|A0A290ZQX4\_9RHO  
sp|A1K2P7|TTCA\_AZOSB  
tr|A0A1E5C9L7|A0A1E5C9L7\_9GAMM  
tr|D0IAC9|D0IAC9\_GRIHO  
tr|A0A2X1V8W5|A0A2X1V8W5\_MORMO  
tr|V5FDB5|V5FDB5\_9VIBR  
tr|A0A2N7DID8|A0A2N7DID8\_9VIBR  
tr|A0A1Z9YRK8|A0A1Z9YRK8\_9ALTE  
tr|A0A1H3QM02|A0A1H3QM02\_9PROT  
tr|A0A1H7TXE2|A0A1H7TXE2\_9PAST  
tr|COB433|COB433\_9GAMM  
tr|A0A1V3K8E7|A0A1V3K8E7\_9PAST  
tr|A0A0M0M226|A0A0M0M226\_9GAMM  
tr|A0A0G3CN87|A0A0G3CN87\_9GAMM  
tr|A0A085HJV6|A0A085HJV6\_9GAMM  
tr|S9ZRS6|S9ZRS6\_9RHO  
tr|A0A1Y0CWR3|A0A1Y0CWR3\_9GAMM  
sp|Q7N3Y7|TTCA\_PHOLL  
tr|A0A2S7JNG9|A0A2S7JNG9\_9BURK  
tr|A0A2M6V2D8|A0A2M6V2D8\_9BURK  
tr|A0A2G1BBN6|A0A2G1BBN6\_9GAMM  
tr|A0A1D2U9X7|A0A1D2U9X7\_9BURK  
tr|A0A081NFN6|A0A081NFN6\_9GAMM  
tr|A0A235CJ05|A0A235CJ05\_9GAMM  
tr|A0A2S0IK97|A0A2S0IK97\_9GAMM  
tr|A0A1G7NVH8|A0A1G7NVH8\_9GAMM  
tr|A0A2S0R041|A0A2S0R041\_9RHO  
tr|K8X231|K8X231\_9GAMM  
tr|L8D9A5|L8D9A5\_9GAMM  
tr|A0A0N0Z7B8|A0A0N0Z7B8\_9GAMM  
tr|A0A136A1P4|A0A136A1P4\_9ALTE  
tr|A0A2L0PJ66|A0A2L0PJ66\_VITS1  
tr|A0A2D5T2E5|A0A2D5T2E5\_PSEAS  
tr|A0A1C3K517|A0A1C3K517\_9BURK  
tr|A0A2T5IVY9|A0A2T5IVY9\_9PROT  
tr|A0A080LSU8|A0A080LSU8\_9PROT  
tr|D5BYI6|D5BYI6\_NITHN  
tr|A0A1H9YRA9|A0A1H9YRA9\_THASX  
tr|A0A0A7RYE8|A0A0A7RYE8\_9GAMM  
sp|Q5QZ01|TTCA\_IDILO  
tr|A0A2N0WME8|A0A2N0WME8\_9GAMM  
tr|A0A263HFI4|A0A263HFI4\_9PAST  
tr|A0A2R5EA30|A0A2R5EA30\_9RHO  
tr|A0A1J5QX57|A0A1J5QX57\_9ZZZZ  
tr|A0A1A9NK07|A0A1A9NK07\_9PROT  
tr|A0A1J5N3D9|A0A1J5N3D9\_9GAMM  
tr|A0A2C9XW01|A0A2C9XW01\_9GAMM  
tr|A0A1B9JZL1|A0A1B9JZL1\_9GAMM  
tr|A0A0Q7XMZ3|A0A0Q7XMZ3\_9BURK  
tr|A0A1A8XDZ4|A0A1A8XDZ4\_9PROT  
tr|A0A1G7V576|A0A1G7V576\_9RHO  
tr|A0A011PPX3|A0A011PPX3\_9PROT  
tr|C7RJR3|C7RJR3\_ACCPU  
tr|A0A1R1IDI8|A0A1R1IDI8\_9RHO  
tr|A0A2N2V785|A0A2N2V785\_9PROT  
tr|K2F263|K2F263\_9ZZZZ  
tr|A0A2N2RIX8|A0A2N2RIX8\_9PROT  
tr|A0A2X0VAX3|A0A2X0VAX3\_9GAMM  
tr|E8LKN7|E8LKN7\_SUCHY  
tr|A0A151QE56|A0A151QE56\_9BURK  
tr|R5EJY6|R5EJY6\_9GAMM  
tr|A0A1T4UZE7|A0A1T4UZE7\_9GAMM  
tr|A0A1Y0D130|A0A1Y0D130\_9GAMM  
tr|A0A2X0SHK5|A0A2X0SHK5\_9PROT  
tr|A0A258ZH96|A0A258ZH96\_9PROT  
tr|A0A126ZC97|A0A126ZC97\_9BURK  
tr|A0A2V8QMU4|A0A2V8QMU4\_9BACT  
tr|A0A2E0ZWB7|A0A2E0ZWB7\_9GAMM  
tr|A0A2G6I698|A0A2G6I698\_SORCE  
tr|A0A2N2QBG9|A0A2N2QBG9\_9PROT  
tr|A0A069AXH0|A0A069AXH0\_BURPE  
tr|I9BZE8|I9BZE8\_9RALS  
tr|A0A1F4HJD3|A0A1F4HJD3\_9BURK  
sp|B1Y629|TTCA\_LEPCP  
tr|J2WAQ6|J2WAQ6\_9BURK  
tr|G8M9T7|G8M9T7\_9BURK  
tr|A0A0E3U9G9|A0A0E3U9G9\_9BURK  
tr|A0A2N0HW99|A0A2N0HW99\_9BURK  
tr|A0A158GN4|A0A158GN4\_9BURK  
tr|A0A1H7ISU8|A0A1H7ISU8\_9BURK  
tr|A0A257CJ84|A0A257CJ84\_9BURK  
tr|A0A1E4PQ02|A0A1E4PQ02\_9BURK  
tr|A0A0N0JTX0|A0A0N0JTX0\_9PROT  
sp|A4G9W3|TTCA\_HERAR  
tr|A0A0Q6W856|A0A0Q6W856\_9BURK  
tr|A0A0U2W252|A0A0U2W252\_9BURK

MSD..D..GKHV|VIRPLAY|CR|EKDI|ER|FSEAR..GF|PII|PC|.N...|L|CGSQ  
VSD..N..GEHV|VIRPLAY|CR|EKDI|IKY|ADLK..QY|PII|PC|.N...|L|CGSQ  
ISD..N..GEHI|VIRPLAY|CR|EKDI|EKY|ATAR..EF|PII|PC|.N...|L|CGSQ  
MSD..D..GQHI|VIRPLAY|CR|EKDI|QR|FAIAR..QY|PII|PC|.N...|L|CGSQ  
VSD..N..GEHV|VIRPLAF|CKE|EL|LQY|AQLK..QF|PII|PC|.N...|L|CGTQ  
ISD..D..GKHI|VIRPLAY|CKE|E|EKY|ALAK..GF|PII|PC|.N...|L|CGSQ  
VSD..N..GEHV|VIRPLAY|CR|EKDI|IKY|SMC..DY|PII|PC|.N...|L|CGSQ  
VSD..N..GEHV|VIRPLAY|CR|EKDI|IKY|SNQC..DY|PII|PC|.N...|L|CGSQ  
VSD..N..GEHV|VIRPLAF|CKE|EL|QY|AALK..QF|PII|PC|.N...|L|CGSQ  
VSD..N..GEHV|VIRPLAY|CR|EKDI|ER|FAELK..EF|PII|PC|.N...|L|CGSQ  
VSD..N..GEHV|VIRPLAY|CR|EKDI|ER|YSEK..AF|PII|PC|.N...|L|CGSQ  
VSD..N..GEHV|VIRPLAY|CKE|E|EAY|AKLK..EY|PII|PC|.N...|L|CGSQ  
VSD..N..GEHV|VIRPLAY|CR|EKDI|ER|YSEMK..AF|PII|PC|.N...|L|CGSQ  
ISD..D..KRNI|VIRPLAY|CR|EAD|IKY|SAFK..AF|PII|PC|.N...|L|CGSQ  
VSD..N..GEHV|VIRPLAY|CKE|EKDI|ERY|AILK..NY|PII|PC|.N...|L|CGTQ  
VSD..N..GEHV|IIRPLAY|CKE|E|EAY|ARLK..KY|PII|PC|.N...|L|CGSQ  
VSD..D..GQHV|VIRPLAY|CTEN|DI|AR|FARM..EY|PII|PC|.N...|L|CGSQ  
VSD..D..GRHV|VIRPLAY|CAEN|DI|AR|FARM..EY|PII|PC|.N...|L|CGSQ  
VSD..D..GQHV|VIRPLAY|CTEN|DI|ER|FARGM..DF|PII|PC|.N...|L|CGSQ  
VSD..N..GEHV|VIRPLAY|CR|EKDI|ERY|AQTA..EF|PII|PC|.N...|L|CGSQ  
VSD..N..GEHV|VIRPLAY|CR|EKDI|ERY|AEAA..AF|PII|PC|.N...|L|CGSQ  
MSD..D..GKHV|VIRPLAY|CR|EKDI|ER|FAEAK..GF|PII|PC|.N...|L|CGSQ  
VSD..N..GEHV|VIRPLAY|CR|EKDI|IK|FADMR..DY|PII|PC|.N...|L|CGSQ  
VSD..N..GEHV|VIRPLAY|CR|EKDI|IKY|SSMC..DY|PII|PC|.N...|L|CGSQ  
VSD..D..GKHV|VIRPLAY|CTER|DI|EKY|ATTV..EF|PII|PC|.N...|L|CGSQ  
VSD..D..GHHI|VIRPLAY|CKE|DL|AA|YAEIE..NF|PII|PC|.N...|L|CGSQ  
MSD..D..GKQI|VIRPLAY|CKE|EKDI|IKY|SDAK..QF|PII|PC|.N...|L|CGSQ  
MSD..D..GKQI|VIRPLAY|AR|EKDI|ER|FAQAK..QF|PII|PC|.N...|L|CGSQ  
ISD..D..AQHI|VIRPLAY|CR|EKDI|EKY|AQAK..DF|PII|PC|.N...|L|CGSQ  
ISD..N..GEHI|VIRPLAY|CR|EKDI|EKY|SVAR..QF|PII|PC|.N...|L|CGSQ  
MSD..D..GKHI|VIRPLAY|CR|EKDI|ERY|AEAK..AF|PII|PC|.N...|L|CGSQ  
ISD..D..GKHI|VIRPLAY|CR|EKDI|ERY|ADAK..AF|PII|PC|.N...|L|CGSQ  
VSD..D..GKHV|VIRPLAY|CTEAD|I|TR|FACTM..AF|PII|PC|.N...|L|CGSQ  
VSD..N..GQHV|VIRPLAY|CKE|EKDI|IE|FAHAK..AF|PII|PC|.N...|L|CGSQ  
MSD..D..GKHI|VIRPLAY|CR|EKDI|ERY|ATAK..AF|PII|PC|.N...|L|CGSQ  
VSD..G..GDHM|VIRPLAY|VAEK|DL|ER|WSKVVR..QF|PII|PC|.T...|L|CGSQ  
VSD..G..GDHM|VIRPMAY|VSEK|DL|VR|WAAHR..EF|PII|PC|.T...|L|CGSQ  
MSD..N..GEHM|VIRPLAY|CKEAD|IEQY|AIHQ..AY|PII|PC|.N...|L|CGSQ  
VSD..D..GRHV|VIRPLCY|VT|EKDI|MR|WAQVR..EF|PII|PC|.N...|L|CGSQ  
VSD..D..GQHT|VIRPLAF|CR|EKDI|VR|FSESK..AF|PII|PC|.N...|L|CGSQ  
VSD..D..GKHV|VIRPLAY|AK|EKDL|VQ|FAEAR..EF|PII|PC|.N...|L|CGSQ  
VSD..N..GEHV|VIRPLAF|CR|EKDI|AR|YAEAM..AF|PII|PC|.N...|L|CGSQ  
ASD..N..GEHI|VIRPLAY|NKEKDI|EQY|SQAM..EF|PII|PC|.N...|L|CGSQ  
VSD..D..GQHV|VIRPLAY|CAHDI|ER|FARM..AY|PII|PC|.N...|L|CGSQ  
MSD..D..GKHI|VIRPLAY|CR|EKDI|ERY|SEAK..EF|PII|PC|.N...|L|CGSQ  
MSD..D..GKHI|VIRPLAY|VKEAD|IEKY|STAQ..NF|PII|PC|.N...|L|CGSQ  
MSD..D..GQHM|VIRPLAY|CR|EKDI|ER|FAQAK..AF|PII|PC|.N...|L|CGSQ  
VSD..D..GQHI|VIRPLAY|CS|EKDI|SQY|SAVM..EF|PII|PC|.N...|L|CGSQ  
VSD..N..GEHI|VIRPLAY|VKEKDL|VR|FAQIR..EF|PII|PC|.N...|L|CGSQ  
MSD..D..GQHM|VIRPLAY|CKEAD|IEQY|ATAQ..AF|PII|PC|.N...|L|CGSQ  
ATD..D..GAHV|VIRPLAY|CS|ESDI|AR|YAADM..AY|PII|PC|.N...|L|CGSQ  
VSD..N..GKHI|VIRPLAY|CKE|DL|AA|YAEIS..DF|PII|PC|.N...|L|CGSQ  
VTD..D..GVHV|VIRPLAY|CGEAD|IAR|FARGM..DY|PII|PC|.N...|L|CGSQ  
LSD..D..GKHV|VIRPLAY|CR|EKDI|EVY|AKIK..AF|PII|PC|.N...|L|CGSQ  
VTD..D..GKHI|VIRPLAY|CR|EKDI|AKY|AAGK..NY|PII|PC|.N...|L|CGSQ  
MND..T..GEHI|VIRPLAY|CKE|DI|AKY|AEFK..QF|PII|PC|.N...|L|CGSQ  
ASD..N..GEHV|VIRPLAY|AR|EKDI|EQY|SAAM..EF|PII|PC|.N...|L|CGSQ  
GSD..N..GEHI|IIRPLAY|CV|ESDI|AKF|AQLK..QF|PII|PC|.N...|L|CGSQ  
MSD..D..GKHI|VIRPLA|CR|EKDI|EKY|AAAK..QF|PII|PC|.N...|L|CGSQ  
VTD..D..GAHV|VIRPLAY|CA|ESDI|AR|YSRGM..EF|PII|PC|.N...|L|CGSQ  
ATD..Q..GEFV|VIRPLAY|CAEK|DI|AS|YARGM..EF|PII|PC|.D...|L|CGSQ  
ATD..K..GEFV|VIRPLAY|CAEK|DI|AA|YARGM..EF|PII|PC|.D...|L|CGSQ  
GSD..D..GKHI|IIRPLAY|CV|ESDI|SE|FATLK..EF|PII|PC|.N...|L|CGSQ  
MND..S..GEHI|IIRPLAY|CKE|DI|AKY|AEIK..QF|PII|PC|.N...|L|CGSQ  
MND..S..GEHI|IIRPLAY|CKE|DI|TKY|AEFK..QF|PII|PC|.N...|L|CGSQ  
LAD..D..GENI|VIRPLAY|CR|EAD|IKY|YAAAM..GF|PII|PC|.N...|L|CGSQ  
VTD..D..GSHV|VIRPLAY|CS|ESDI|AR|FARGM..AY|PII|PC|.N...|L|CGSQ  
LTD..D..GAHV|VIRPLAY|CS|HDI|AR|YARGM..AF|PII|PC|.N...|L|CGSQ  
LTD..D..GAHV|VIRPLAY|CS|EKDI|AR|FARGM..AY|PII|PC|.N...|L|CGSQ  
RTD..D..GCHV|VIRPLAY|CR|ESDI|AR|FARGM..EY|PII|PC|.N...|L|CGSQ  
VTD..D..KAHV|VIRPLAY|CS|EAD|IAR|FARGM..DF|PII|PC|.N...|L|CGSQ  
VTD..D..GAHV|VIRPLAY|CP|ESDI|AKF|FARGM..EF|PII|PC|.N...|L|CGSQ  
VTD..D..KAHV|VIRPLAY|CA|ESDI|AKF|FARGM..AF|PII|PC|.N...|L|CGSQ  
VTD..D..KAHV|VIRPLAY|CA|EAD|IAK|FARGM..EF|PII|PC|.N...|L|CGSQ  
RTD..D..DTLT|VIRPLAY|CKE|DL|ITL|SKLK..EY|PVLPK|.G...|L|CGY  
RTD..D..DTLT|LIRPLAY|CR|ERDL|NIL|SKLK..DY|PVLPK|.G...|L|CGY  
VSD..N..GDLT|VIRPLAY|CR|ERDL|AR|YAEER..NF|PII|PC|.N...|L|CGSQ  
RND..K..DDLT|VIRPLIY|CR|EKDI|VSI|SKIK..EY|PVLPK|.G...|L|CGW  
RND..K..DDLT|VIRPLIY|CR|ERDL|IAL|SKLK..EY|PVLPK|.G...|L|CGW  
VSD..N..GQHV|VIRPLAY|CKE|DI|IAF|AKAK..EF|PII|PC|.N...|L|CGSQ  
VTD..K..GEHI|VIRPLAY|CAEK|DI|AY|FARM..KF|PII|PC|.N...|L|CGSQ  
VTD..K..GDHV|VIRPLAY|CAEK|DI|AS|FARM..EF|PII|PC|.N...|L|CGSQ  
KSD..D..GRNV|VIRPLAY|CKE|DI|KR|HANAK..MY|PII|PC|.T...|L|CGSQ  
RSN..D..GRNI|VIRPLSY|CW|ERDI|SEY|AAQRM..EF|PII|PC|.D...|L|CGSQ  
LSD..D..KRNI|VIRPLSY|CKE|LE|DR|YAKLM..NF|PII|PC|.D...|L|CGSQ  
VSD..D..GKHV|VIRPLIY|CAEDV|IQS|FSLAC..KF|PVLPK|.G...|L|CGTQ  
VSD..N..GEFM|VIRPLAY|VP|EKDL|IR|WAEVR..QF|PII|PC|.T...|L|CGSQ  
QSD..D..GKNI|VIRPLAY|AKET|DL|EKY|AELR..EF|PII|PC|.N...|L|CGSQ  
QSD..D..GRNV|VIRPLAY|VR|ERDL|ER|YAEVK..GF|PII|PC|.N...|L|CGSQ  
VSD..D..GRHT|VIRPLAY|VA|HDL|GT|WAAHR..QF|PII|PC|.T...|L|CGSQ  
VSD..D..GRHT|VIRPLAY|VA|ETDL|ER|WAEHR..AF|PII|PC|.T...|L|CGTQ  
QSD..D..GRQI|VIRPLAY|VKE|DL|IRY|AEIK..QF|PII|PC|.D...|L|CGSQ  
QSD..D..GKNV|VIRPLAY|VKE|DL|EKY|AELR..EF|PII|PC|.N...|L|CGSQ  
QSD..D..GKNV|VIRPLAY|VR|EPDL|ER|YAEYK..QF|PII|PC|.T...|L|CGSQ  
QSD..D..GKHI|VIRPMAY|VKEED|TQR|YAEYK..GF|PII|PC|.D...|L|CGSQ  
QSD..D..GKNI|VIRPLAY|VKE|DL|EKY|AELR..EF|PII|PC|.N...|L|CGSQ  
VSD..D..GKNV|VIRPLAY|VR|ESDL|QRW|AEHR..EF|PII|PC|.N...|L|CGSQ  
VSD..N..GEHV|VIRPLAY|VA|ETDL|EKW|AVHR..EF|PII|PC|.S...|L|CGSQ  
VSD..D..GRNV|VIRPLAY|VT|ETDL|ER|WAGHR..QF|PII|PC|.T...|L|CGSQ  
VSD..D..GRNI|VIRPLAY|VA|ESDL|IRN|AEIK..QY|PII|PC|.N...|L|CGSQ  
QSD..D..GKHI|VIRPLAY|VKEAD|T|RYAQ|IK..NF|PII|PC|.D...|L|CGSQ  
VSD..D..GKNV|VIRPLAY|VKEPDL|VRW|AEHR..EF|PII|PC|.N...|L|CGSQ  
VSD..T..GQHV|VIRPLAY|VA|EPDL|VRW|AEHR..EF|PII|PC|.N...|L|CGSQ

tr|A0A257D8X1|A0A257D8X1\_9BURK  
tr|A0A2S5T0L8|A0A2S5T0L8\_9BURK  
tr|A0A0G3EQ23|A0A0G3EQ23\_9BURK  
tr|A0A2N2TCB9|A0A2N2TCB9\_9PROT  
tr|A0A0Q4NX11|A0A0Q4NX11\_9BURK  
tr|IOHLE1|IOHLE1\_RUBGI  
tr|A0A0C2BG76|A0A0C2BG76\_9BURK  
tr|A0A085FQK3|A0A085FQK3\_9BURK  
tr|A0A0R0MBG2|A0A0R0MBG2\_9BURK  
tr|A0A2P5K8F8|A0A2P5K8F8\_9BURK  
tr|A0A0Q6LK70|A0A0Q6LK70\_9BURK  
tr|A0A1Y2Q832|A0A1Y2Q832\_9BURK  
tr|A0A0L6TAQ8|A0A0L6TAQ8\_9BURK  
tr|A0A2U1DUA6|A0A2U1DUA6\_9BURK  
tr|A0A1Y0ES54|A0A1Y0ES54\_9BURK  
tr|A0A060NJ81|A0A060NJ81\_9BURK  
tr|A0A2M8EE54|A0A2M8EE54\_9BURK  
tr|A0A221KEA4|A0A221KEA4\_VITFI  
tr|A0A1S8FRQ0|A0A1S8FRQ0\_9BURK  
tr|A0A0Q4GYK6|A0A0Q4GYK6\_9BURK  
tr|A0A016XGF4|A0A016XGF4\_9BURK  
tr|A0A2W5QR70|A0A2W5QR70\_VARPD  
tr|A0A258NZQ2|A0A258NZQ2\_9BURK  
tr|A0A2R4F9B5|A0A2R4F9B5\_9BURK  
tr|A0A1Q3R2G4|A0A1Q3R2G4\_9BURK  
tr|A0A0Q8T160|A0A0Q8T160\_9BURK  
tr|A0A2N2RMC2|A0A2N2RMC2\_9PROT  
tr|A0A2S5SVE7|A0A2S5SVE7\_9BURK  
tr|A0A1H9S6W8|A0A1H9S6W8\_9BURK  
tr|A0A1Q8YGB2|A0A1Q8YGB2\_9BURK  
tr|A0A0K1NE84|A0A0K1NE84\_9BURK  
tr|A0A2E2K941|A0A2E2K941\_9GAMM  
tr|S6HH18|S6HH18\_9GAMM  
tr|S6GEA2|S6GEA2\_9GAMM  
tr|A0A2G6L769|A0A2G6L769\_9GAMM  
tr|A0A1Y5D7E5|A0A1Y5D7E5\_9GAMM  
tr|A0A162JZM0|A0A162JZM0\_9GAMM  
tr|I2JK26|I2JK26\_9GAMM  
tr|A0A1T4LA54|A0A1T4LA54\_9GAMM  
tr|A0A2P6AQM6|A0A2P6AQM6\_9GAMM  
tr|A0A2D6C0C1|A0A2D6C0C1\_9PROT  
tr|A0A2E6MC67|A0A2E6MC67\_9GAMM  
tr|A0A0Q9YQ77|A0A0Q9YQ77\_9COXI  
tr|R4YM77|R4YM77\_9GAMM  
tr|A0A2D8IV68|A0A2D8IV68\_9GAMM  
tr|A0A0M3BW87|A0A0M3BW87\_ACIP1  
tr|A0A2A5GDH7|A0A2A5GDH7\_9GAMM  
tr|A0A2R4IZ02|A0A2R4IZ02\_9GAMM  
tr|Q1N675|Q1N675\_9GAMM  
tr|A0A2V1MRG8|A0A2V1MRG8\_9GAMM  
tr|A0A2G6JPB4|A0A2G6JPB4\_NEPCE  
tr|A0A1D8RZY8|A0A1D8RZY8\_9GAMM  
tr|A0A2S6H7K9|A0A2S6H7K9\_9GAMM  
tr|A0A1Y6EYI4|A0A1Y6EYI4\_9GAMM  
tr|A0A1G9S8A4|A0A1G9S8A4\_9BURK  
tr|A0A2T5IWQ3|A0A2T5IWQ3\_9LACT  
tr|A0A0Q6BL24|A0A0Q6BL24\_9PROT  
tr|A0A1M4ZGN9|A0A1M4ZGN9\_9GAMM  
tr|A0A1G6A7Y4|A0A1G6A7Y4\_9GAMM  
tr|A0A1H2UJU7|A0A1H2UJU7\_9ALTE  
tr|A0A255QCR2|A0A255QCR2\_9BURK  
tr|A0A1I7GPK9|A0A1I7GPK9\_9BURK  
tr|A0A2E3CTL6|A0A2E3CTL6\_9GAMM  
tr|A0A2G2GZK4|A0A2G2GZK4\_9GAMM  
tr|D4ZKD3|D4ZKD3\_SHEVD  
tr|A0A2E4Z906|A0A2E4Z906\_9GAMM  
tr|A0A2E2XIK0|A0A2E2XIK0\_9GAMM  
tr|A0A160N2I8|A0A160N2I8\_9GAMM  
tr|A0A1E4L069|A0A1E4L069\_9GAMM  
tr|A0A2T4D6Z5|A0A2T4D6Z5\_9GAMM  
tr|A0A085U7Q6|A0A085U7Q6\_YERRU  
sp|Q47ZU5|TTCA\_COLP3  
tr|A0A1I0AQ21|A0A1I0AQ21\_9PROT  
tr|A0A1H4G6R6|A0A1H4G6R6\_9BURK  
tr|A0A2K9LR78|A0A2K9LR78\_9GAMM  
tr|A0A2M7LUW5|A0A2M7LUW5\_9GAMM  
tr|A0A246KYX3|A0A246KYX3\_9GAMM  
tr|A0A2D8RAF4|A0A2D8RAF4\_9GAMM  
tr|A0A0R0DYI3|A0A0R0DYI3\_9GAMM  
tr|A0A0R0ATI2|A0A0R0ATI2\_STEMA  
tr|A0A2E6LUI9|A0A2E6LUI9\_9GAMM  
tr|A0A094LT70|A0A094LT70\_9GAMM  
tr|A0A1I6YH43|A0A1I6YH43\_9GAMM  
tr|W7R3R4|W7R3R4\_9ALTE  
sp|ASH4Q7|TTCA\_SHEPA  
tr|A0A2W4XNW8|A0A2W4XNW8\_9CYAN  
tr|A0A0W1SMG6|A0A0W1SMG6\_9GAMM  
tr|A0A2C9ERR4|A0A2C9ERR4\_PSEPH  
tr|A0A0J6I3B3|A0A0J6I3B3\_9PSED  
tr|A0A0F9MHE3|A0A0F9MHE3\_ZZZZ  
tr|W6M5Z2|W6M5Z2\_9GAMM  
tr|A0A2N7DVF7|A0A2N7DVF7\_9GAMM  
tr|A0A0R0CDH7|A0A0R0CDH7\_9GAMM  
tr|A0A2A6ASR9|A0A2A6ASR9\_9ALTE  
tr|E1ST69|E1ST69\_FERBD  
tr|A0A1X7AIN8|A0A1X7AIN8\_9GAMM  
tr|A0A2S7XCU8|A0A2S7XCU8\_9GAMM  
tr|A0A0Q7Q6A4|A0A0Q7Q6A4\_9GAMM  
tr|A0A2W5DV11|A0A2W5DV11\_9BURK  
tr|A0Z1R6|A0Z1R6\_9GAMM  
tr|A0A269PKF3|A0A269PKF3\_9GAMM  
sp|Q21IJ4|TTCA\_SACD2  
tr|A0A1I1P8I7|A0A1I1P8I7\_9GAMM

VS|D|.D|.D|.GKNI|VIRPLAY|VA|ETD|L|E|W|A|E|H|R|.QF|PII|P|C|.T|.L|CGSQ  
VS|D|.D|.D|.GRHV|VIRPLAY|VN|E|D|L|E|W|A|E|F|R|.QF|PII|P|C|.S|.L|CGSQ  
QS|D|.D|.D|.GRHI|VIRPLAY|VK|E|R|D|L|E|H|Y|A|E|F|K|.AF|PII|P|C|.N|.L|CGSQ  
VS|D|.D|.D|.GQHV|VIRPMAY|VA|E|K|D|L|A|R|W|A|E|L|R|.QF|PII|P|C|.T|.L|CGSQ  
MS|D|.D|.D|.GKHM|VIRPLAY|VK|E|E|T|E|R|Y|A|E|V|K|.GF|PII|P|C|.D|.L|CGSQ  
VS|D|.D|.D|.GRHV|VIRPLAY|VA|E|D|L|E|R|W|A|E|H|R|.AF|PII|P|C|.S|.L|CGNQ  
QS|D|.D|.D|.GKHM|VIRPLAY|VK|E|A|D|M|E|R|Y|A|E|V|K|.QF|PII|P|C|.D|.L|CGSQ  
VS|D|.D|.D|.GKHM|VIRPLAY|VK|E|A|D|M|E|R|Y|A|E|V|K|.GF|PII|P|C|.D|.L|CGSQ  
TS|D|.N|.D|.GEFI|VIRPMAY|VV|E|K|D|L|I|R|W|A|E|H|K|.AF|PII|P|C|.T|.L|CGSQ  
QS|D|.D|.D|.GKHI|VIRPLAY|VK|E|N|D|L|E|K|Y|A|Q|L|R|.EF|PII|P|C|.N|.L|CGSQ  
IS|D|.D|.D|.GKNI|VIRPLAY|VA|E|T|D|L|E|R|W|A|A|H|R|.QF|PII|P|C|.T|.L|CGSQ  
VS|D|.D|.D|.GRHV|VIRPMAY|VA|E|K|D|L|I|R|W|A|E|I|R|.QF|PII|P|C|.T|.L|CGSQ  
VS|D|.D|.D|.GRHI|VIRPLAY|VA|E|A|D|L|E|R|W|A|R|H|R|.QF|PII|P|C|.T|.L|CGNQ  
QS|D|.R|.D|.GDHL|IIRPLAY|VA|E|D|D|L|T|R|W|A|E|I|R|.NF|PII|P|C|.T|.L|CGSQ  
NS|D|.N|.D|.GEFI|VIRPMAY|VY|E|R|D|L|V|R|W|A|E|H|R|.EF|PII|P|C|.T|.L|CGSQ  
VS|D|.N|.D|.GEFM|VIRPLAY|VA|E|P|D|L|I|R|W|A|E|V|R|.QF|PLI|P|C|.T|.L|CGSQ  
VS|D|.D|.D|.GGHI|VIRPLAY|VA|E|K|D|L|T|A|W|A|A|H|R|.QF|PII|P|C|.S|.L|CGSQ  
VS|D|.N|.D|.GEFV|VIRPLAY|VA|E|P|D|L|E|K|W|A|A|H|R|.EF|PII|P|C|.S|.L|CGSQ  
VS|D|.D|.D|.GRHV|VIRPLAF|VA|E|K|D|A|Q|R|W|S|Q|H|R|.DF|PII|P|C|.N|.L|CGSQ  
VS|D|.D|.D|.GKHI|VIRPLAY|VA|E|K|D|L|V|R|W|A|A|H|R|.QF|PLI|P|C|.T|.L|CGSQ  
VS|D|.N|.D|.GEFI|VIRPLAY|VA|E|K|D|L|I|R|W|A|A|H|R|.QY|PII|P|C|.T|.L|CGSQ  
VS|D|.D|.D|.GRHV|VIRPLAY|VP|E|K|D|L|V|R|W|A|Q|H|R|.QF|PII|P|C|.T|.L|CGSQ  
VS|D|.T|.D|.GKHV|VIRPMAY|VP|E|K|D|L|I|K|W|A|Q|V|R|.DF|PII|P|C|.T|.L|CGSQ  
VS|D|.D|.D|.GRHV|VIRPLAY|VT|E|K|D|T|R|W|A|Q|Q|Q|.QF|PII|P|C|.N|.L|CGSQ  
TS|D|.N|.D|.GEFI|VIRPLAY|VA|E|S|D|L|V|R|W|A|E|H|R|.QF|PII|P|C|.N|.L|CGSQ  
QS|D|.R|.D|.GDHV|IIRPLAY|VA|E|A|D|L|T|R|W|A|E|L|R|.EF|PII|P|C|.T|.L|CGSQ  
VS|D|.D|.D|.GRHI|VIRPLAY|VA|E|K|D|L|T|R|W|A|E|H|R|.QF|PII|P|C|.T|.L|CGSQ  
VS|D|.D|.D|.GKHI|VIRPLAY|VP|E|H|D|L|A|A|W|A|E|H|R|.QF|PII|P|C|.D|.L|CGSQ  
VS|D|.R|.D|.GDHI|VIRPLAY|HVA|E|A|D|L|R|W|A|E|L|R|.AF|PII|P|C|.T|.L|CGSQ  
VS|D|.D|.D|.GGHI|VIRPLTNVA|E|K|D|L|A|W|A|K|H|R|.EF|PLI|P|C|.S|.L|CGSQ  
TS|D|.N|.D|.GEFI|VIRPLAY|VA|E|N|D|L|I|R|W|A|E|H|R|.QF|PII|P|C|.N|.L|CGSQ  
LS|D|.D|.D|.KRNI|IIRPLAY|CR|E|A|D|I|E|K|F|S|A|Y|K|.QF|PII|P|C|.N|.L|CGSQ  
LS|D|.D|.D|.KRNI|VIRPLAY|AR|E|K|D|I|E|Y|A|S|F|K|.QF|PII|P|C|.N|.L|CGSQ  
LS|D|.D|.D|.GRNI|VIRPLAY|AR|E|A|D|I|E|F|A|G|Y|K|.NF|PII|P|C|.N|.L|CGSQ  
LS|D|.D|.D|.NRNI|VIRPLAY|CR|E|R|D|I|K|R|F|A|E|I|K|.GF|PVV|P|C|.G|.L|CGSQ  
LS|D|.D|.D|.KRNV|VIRPLAY|CK|E|D|E|I|E|A|F|S|K|F|K|.SY|PVI|P|C|.N|.L|CGSQ  
LS|D|.D|.D|.GRNI|VIRPLAY|CR|E|K|D|L|K|F|A|D|I|M|.EY|PII|P|C|.N|.L|CGSQ  
LS|D|.D|.D|.KRNI|VIRPLAY|CR|E|S|D|I|E|A|F|S|Q|Y|K|.EF|PII|P|C|.N|.L|CGSQ  
LS|D|.D|.D|.GKNI|VIRPLAY|CT|E|K|D|I|E|A|F|A|E|L|K|.EF|PII|P|C|.N|.L|CGSQ  
LS|D|.D|.D|.GKNV|LIRPLAY|CK|E|K|D|I|A|E|Y|A|R|L|K|.GF|PII|P|C|.N|.L|CGSQ  
LT|D|.D|.D|.RRHV|VIRPLAY|CA|E|A|H|I|A|K|F|A|R|G|M|.EY|PII|P|C|.T|.L|CGTQ  
RS|D|.D|.D|.GRNI|LIRPLY|CR|E|S|L|I|S|R|W|S|E|F|Q|.QH|PII|P|C|.N|.L|CGSQ  
LT|D|.D|.D|.KSL|VIRPLVY|VQ|E|R|D|I|A|E|F|A|Y|L|S|.EF|PII|P|C|.N|.L|CGSQ  
LS|D|.D|.D|.KRNI|VIRPLAY|CK|E|T|D|I|A|E|F|A|R|L|K|.EF|PII|P|C|.N|.L|CGSQ  
LS|D|.D|.D|.GRNV|VIRPLAY|CR|E|S|D|L|V|A|Y|A|D|Y|K|.AF|PII|P|C|.N|.L|CGSQ  
LS|D|.D|.D|.KRNI|LIRPLAY|VE|K|D|I|K|Y|A|E|I|R|.QF|PII|P|C|.N|.L|CGSQ  
LS|D|.D|.D|.KRNI|VIRPLAY|CK|E|D|D|L|E|Y|A|E|L|K|.XF|PII|P|C|.N|.L|CGSQ  
LS|D|.D|.D|.QRHI|VIRPLAY|CR|E|S|D|I|E|A|Y|S|N|A|R|.EF|PII|P|C|.N|.L|CGSQ  
LS|D|.D|.D|.KRNI|VIRPMAY|CK|E|S|D|I|A|A|F|S|E|Y|K|.QF|PII|P|C|.N|.L|CGSQ  
LS|D|.D|.D|.GANM|VIRPLAY|CR|E|K|D|I|A|E|Y|A|K|L|K|.AF|PII|P|C|.N|.L|CGSQ  
VS|D|.D|.D|.GKNM|VIRPLAY|SR|E|K|D|I|A|A|F|A|E|L|K|.QF|PII|P|C|.N|.L|CGSQ  
VS|D|.N|.D|.GEHV|VIRPLAF|CK|E|A|E|L|I|Q|Y|A|Q|L|R|.AF|PII|P|C|.N|.L|CGSQ  
LS|D|.D|.D|.KRNI|IIRPLAY|TR|E|K|D|I|E|R|L|A|A|F|K|.NY|PII|P|C|.N|.L|CGSQ  
VS|D|.N|.D|.GEHV|VIRPLAY|VR|E|K|D|I|Q|S|Y|D|K|K|.AF|PII|P|C|.N|.L|CGSQ  
VS|D|.D|.D|.GKHV|VIRPLCY|VP|E|K|D|T|A|R|W|A|Q|Y|Q|.EF|PII|P|C|.N|.L|CGSQ  
VS|D|.D|.D|.GENI|LIRPLAY|CE|K|D|I|E|Y|A|R|Y|K|.AF|PII|P|C|.N|.L|CGSQ  
AT|N|.R|.D|.GEFM|VIRPLAY|CA|E|K|D|I|A|A|Y|R|G|M|.QF|PII|P|C|.D|.L|CGSQ  
LS|D|.D|.D|.GKHV|VIRPLAY|VR|E|A|D|I|A|A|Y|R|M|R|.GF|PII|P|C|.N|.L|CGSQ  
VS|D|.N|.D|.GKHV|VIRPLVY|CR|E|K|D|I|A|K|Y|S|E|H|M|.QF|PII|P|C|.N|.L|CGSQ  
HS|D|.D|.D|.GRNT|VIRPLAY|CR|E|K|D|I|A|E|Y|A|G|L|R|.QF|PII|P|C|.N|.L|CGSQ  
VS|D|.D|.D|.GRHM|VIRPLCY|VP|E|K|D|T|A|R|W|A|Q|Y|Q|.QF|PII|P|C|.N|.L|CGSQ  
AS|D|.N|.D|.GKHV|VIRPLAY|VP|E|K|D|T|A|R|W|A|Q|Y|Q|.NF|PII|P|C|.N|.L|CGSQ  
LS|D|.D|.D|.GRNI|VIRPLS|Y|CR|E|K|D|I|A|F|A|N|F|K|.EF|PII|P|C|.N|.L|CGSQ  
VS|D|.N|.D|.GKHV|VIRPLAY|TR|E|K|D|I|A|K|Y|A|E|H|M|.NF|PII|P|C|.N|.L|CGSQ  
LS|D|.D|.D|.GANM|VIRPLAY|SR|E|K|D|I|A|E|Y|A|E|L|K|.SF|PII|P|C|.N|.L|CGSQ  
VS|D|.N|.D|.GEHV|VIRPLAY|VR|E|K|D|I|E|R|Y|A|E|Y|Q|.QF|PII|P|C|.N|.L|CGSQ  
RS|D|.D|.D|.QRNV|VIRPLAY|CR|E|A|D|I|A|Y|A|D|H|K|.QF|PII|P|C|.N|.L|CGSQ  
RS|D|.D|.D|.GRHV|VIRPLAY|CR|E|S|D|I|A|E|Y|A|A|Q|R|.AF|PII|P|C|.N|.L|CGSQ  
RS|D|.D|.D|.GRHI|VIRPLAY|VA|E|A|D|I|A|R|Y|A|E|A|K|.GF|PII|P|C|.N|.L|CGSQ  
VS|D|.N|.D|.GQHV|VIRPLAY|AR|E|K|D|I|A|K|Y|S|E|A|C|.EF|PII|P|C|.N|.L|CGSQ  
RS|D|.D|.D|.GRNV|VIRPLAY|CR|E|K|D|I|E|Y|A|E|H|K|.DF|PII|P|C|.N|.L|CGSQ  
VS|D|.N|.D|.GEHV|VIRPLAF|CK|E|S|E|L|I|Q|Y|S|E|L|K|.HF|PII|P|C|.N|.L|CGSQ  
VS|D|.D|.D|.GKHI|VIRPLAY|CK|E|K|D|L|A|A|Y|A|E|M|.NF|PII|P|C|.N|.L|CGSQ  
AT|D|.D|.D|.GAHI|VIRPLAY|CK|E|S|D|I|A|T|Y|A|R|A|M|.EY|PII|P|C|.D|.L|CGSQ  
LS|D|.D|.D|.GRNI|VIRPMAY|CR|E|K|D|L|V|R|F|A|D|C|K|.GF|PII|P|C|.N|.L|CGSQ  
LS|D|.D|.D|.GANI|VIRPLAY|CR|E|K|D|I|Q|E|Y|S|T|L|K|.SF|PII|P|C|.N|.L|CGSQ  
RS|D|.D|.D|.GRHV|VIRPLAY|VR|E|S|D|I|V|E|Y|A|Q|R|.RF|PII|P|C|.N|.L|CGSQ  
KS|D|.D|.D|.GRNV|VIRPLAY|CA|E|K|D|L|S|K|F|A|D|L|K|.AF|PII|P|C|.N|.L|CGSQ  
RS|D|.D|.D|.GRHV|VIRPLVY|VR|E|S|D|I|E|Y|A|N|V|R|.RF|PII|P|C|.N|.L|CGSQ  
LS|D|.D|.D|.GKHV|VIRPLAY|VR|E|A|D|I|E|Y|A|A|R|.RF|PII|P|C|.N|.L|CGSQ  
KS|D|.D|.D|.GKHI|LIRPLAY|CR|E|Q|D|I|E|R|Y|S|E|M|K|.EF|PII|P|C|.N|.L|CGSQ  
LS|D|.D|.D|.GANV|VIRPLAY|CR|E|K|D|I|E|E|Y|A|T|L|K|.DF|PII|P|C|.N|.L|CGSQ  
MS|D|.N|.D|.GEHM|VIRPLAY|CK|E|A|D|I|S|K|Y|A|F|S|Q|.GY|PII|P|C|.N|.L|CGSQ  
IS|D|.N|.D|.KEHI|VIRPLAY|CR|E|K|D|I|S|K|Y|S|V|I|K|.EF|PII|P|C|.N|.L|CGSQ  
LS|D|.D|.D|.GANM|VIRPLAY|AR|E|K|D|I|A|E|Y|A|A|L|K|.GF|PII|P|C|.N|.L|CGSQ  
LT|D|.D|.D|.RRHI|VIRPLAY|CP|E|V|D|I|A|R|Y|A|R|Y|R|.EF|PII|P|C|.T|.L|CGSQ  
LS|D|.D|.D|.GKNI|VIRPLAY|CK|E|A|D|I|A|E|F|S|R|L|M|.EF|PII|P|C|.N|.L|CGSQ  
LAD|.D|.D|.GRNV|VIRPLAY|CS|E|K|D|I|Q|A|Y|S|D|L|K|.QF|PII|P|C|.N|.L|CGSQ  
RS|D|.D|.D|.GRNV|VIRPLAY|CN|E|K|D|I|Q|A|Y|S|D|L|Q|.QF|PII|P|C|.N|.L|CGSQ  
HS|D|.D|.D|.GRNT|VIRPLAY|SR|E|K|D|L|R|Y|A|E|L|R|.QF|PII|P|C|.N|.L|CGSQ  
LS|D|.D|.D|.GQHV|VIRPLAY|CK|E|H|D|L|T|T|Y|A|A|R|.QF|PII|P|C|.N|.L|CGSQ  
LS|D|.D|.D|.GANM|VIRPLAY|CK|E|K|D|I|A|E|Y|A|E|L|K|.QF|PII|P|C|.N|.L|CGSQ  
LS|D|.D|.D|.GKHV|VIRPLAY|VS|E|S|D|I|D|Y|A|V|A|C|.NF|PII|P|C|.N|.L|CGSQ  
VS|D|.D|.D|.GQNI|VIRPLAY|CS|E|K|D|I|E|K|Y|S|N|A|A|.EF|PII|P|C|.N|.L|CGSQ  
LS|D|.D|.D|.GANM|VIRPMAY|CR|E|K|D|I|S|E|Y|A|D|L|K|.AF|PII|P|C|.N|.L|CGSQ  
RS|D|.D|.D|.GRNV|IIRPLAF|CR|E|K|D|L|A|K|F|A|E|L|M|.EF|PII|P|C|.N|.L|CGSQ  
VS|D|.N|.D|.GEHV|VIRPLAY|CR|E|K|D|I|K|Y|A|D|M|A|.DY|PII|P|C|.N|.L|CGSQ  
LS|D|.D|.D|.DRHV|IIRPLAY|VR|E|D|D|I|A|A|Y|A|E|A|K|.RF|PII|P|C|.N|.L|CGSQ  
VS|D|.D|.D|.GKNV|VIRPLAY|VK|E|P|D|L|V|R|W|A|E|H|R|.EF|PII|P|C|.N|.L|CGSQ  
LS|D|.D|.D|.RKNV|VIRPMAY|CK|E|A|D|I|Q|A|Y|A|K|A|K|.AF|PII|P|C|.N|.L|CGSQ  
AS|D|.N|.D|.GEHM|VIRPLAY|CK|E|E|E|I|T|Q|Y|A|K|L|K|.EF|PII|P|C|.N|.L|CGSQ  
LAD|.D|.D|.KRNI|IIRPLAY|CV|E|A|D|L|E|E|F|A|K|Q|K|.AF|PII|P|C|.N|.L|CGSQ  
AS|D|.N|.D|.GEHM|VIRPLAY|CK|E|D|E|I|A|Q|Y|A|Q|L|K|.AF|PII|P|C|.N|.L|CGSQ



tr|A0A1W9JDH2|A0A1W9JDH2\_9PROT  
tr|A0A1M5BF43|A0A1M5BF43\_9BURK  
tr|A0A2E7TF27|A0A2E7TF27\_9GAMM  
tr|A4BCL14|A4BCL14\_9GAMM  
tr|A0A2V1GX35|A0A2V1GX35\_9FLAO  
tr|A0A142BEY8|A0A142BEY8\_9GAMM  
tr|A0A0J8GW65|A0A0J8GW65\_9ALTE  
tr|A0A1M5FZ26|A0A1M5FZ26\_9GAMM  
tr|A0A257U9D9|A0A257U9D9\_9PROT  
tr|A0A2E9D1E6|A0A2E9D1E6\_9GAMM  
tr|A0A126NMK7|A0A126NMK7\_9GAMM  
tr|K6ZRA0|K6ZRA0\_9ALTE  
tr|A0A2N0WY52|A0A2N0WY52\_9GAMM  
tr|A0A1D2QPG0|A0A1D2QPG0\_9GAMM  
tr|A0A0Q9ESH6|A0A0Q9ESH6\_9GAMM  
tr|A0A1V4CCB4|A0A1V4CCB4\_9BURK  
tr|A0A1G8SDV5|A0A1G8SDV5\_9GAMM  
tr|A0A0A2XGJ5|A0A0A2XGJ5\_9PAST  
tr|A0A1N6Q9N0|A0A1N6Q9N0\_9GAMM  
tr|A0A2I9CXW9|A0A2I9CXW9\_9DEIO  
tr|A0A1Z8A689|A0A1Z8A689\_9GAMM  
tr|K4KEMO|K4KEMO\_STMAS  
tr|A0A2EOHL83|A0A2EOHL83\_9GAMM  
tr|A0A2E6UBI3|A0A2E6UBI3\_9GAMM  
tr|A0A2TOVN17|A0A2TOVN17\_9GAMM  
tr|C7RA21|C7RA21\_KANKD  
tr|A0A0A2WH96|A0A0A2WH96\_9GAMM  
tr|A0A1B3BC99|A0A1B3BC99\_9GAMM  
tr|A0A2SOVTT1|A0A2SOVTT1\_9ALTE  
tr|A0A1M7HXG8|A0A1M7HXG8\_9GAMM  
tr|A0A1H4FYD6|A0A1H4FYD6\_ALKAM  
tr|A0A1N6RTY4|A0A1N6RTY4\_9GAMM  
tr|E6WX66|E6WX66\_PSEUU  
tr|A0A1A9F5J5|A0A1A9F5J5\_9GAMM  
tr|A0A0Q8EDG6|A0A0Q8EDG6\_9GAMM  
tr|A0A2E7ZPW4|A0A2E7ZPW4\_9DELT  
tr|A0A1W1V8N1|A0A1W1V8N1\_9DEIO  
tr|A0A2D9SQE6|A0A2D9SQE6\_9GAMM  
tr|A0A2G2JE37|A0A2G2JE37\_9GAMM  
tr|H3ZAK4|H3ZAK4\_9ALTE  
tr|A0A258V319|A0A258V319\_9PROT  
tr|A0A1E7Q6F9|A0A1E7Q6F9\_9GAMM  
tr|A0A1W9KKP7|A0A1W9KKP7\_9PROT  
tr|K2JNE8|K2JNE8\_9GAMM  
tr|A0A2A5HUD4|A0A2A5HUD4\_9ALTE  
tr|A0A2U2ADCO|A0A2U2ADCO\_9GAMM  
tr|A0A2G6EIJ4|A0A2G6EIJ4\_9GAMM  
tr|A4CAS6|A4CAS6\_9GAMM  
tr|A0A2R5F7M4|A0A2R5F7M4\_9PROT  
tr|M1FGK9|M1FGK9\_9ALTE  
tr|A0A1D2X618|A0A1D2X618\_9GAMM  
tr|A0A2E9JUF8|A0A2E9JUF8\_9GAMM  
tr|A0A081KEH3|A0A081KEH3\_9GAMM  
tr|A0A1N7KE69|A0A1N7KE69\_9GAMM  
tr|A0A0U2ZN38|A0A0U2ZN38\_9ALTE  
tr|A0A2S7UWA8|A0A2S7UWA8\_9GAMM  
tr|A0A0E2Z2P9|A0A0E2Z2P9\_9GAMM  
tr|A0A290TR64|A0A290TR64\_PSEO7  
tr|A0A172YKH4|A0A172YKH4\_9GAMM  
tr|A0A2N2SFH7|A0A2N2SFH7\_9PROT  
tr|A0A2N2RWE8|A0A2N2RWE8\_9PROT  
tr|A0A0S8AA06|A0A0S8AA06\_9GAMM  
tr|A0A1H9YSB8|A0A1H9YSB8\_9ALTE  
tr|K2LB06|K2LB06\_9GAMM  
tr|A0A1I0HCR0|A0A1I0HCR0\_THASX  
tr|A0A2A5CH30|A0A2A5CH30\_9GAMM  
tr|A0A2N2VG94|A0A2N2VG94\_9PROT  
tr|A0A0F4Q4B8|A0A0F4Q4B8\_9GAMM  
tr|A0A246HHM2|A0A246HHM2\_STEMA  
tr|A0A2K1Q139|A0A2K1Q139\_9GAMM  
tr|A0A2D8KYB7|A0A2D8KYB7\_9GAMM  
tr|A0A238Z6E0|A0A238Z6E0\_9PROT  
tr|K6Z7L1|K6Z7L1\_9ALTE  
tr|A0A1Q5U4V8|A0A1Q5U4V8\_9GAMM  
tr|A0A1D2S491|A0A1D2S491\_9BURK  
tr|A0A1E7PZD4|A0A1E7PZD4\_9ALTE  
tr|I3ICA1|I3ICA1\_9GAMM  
tr|A0A244CVN1|A0A244CVN1\_9GAMM  
tr|A0A291THA3|A0A291THA3\_9GAMM  
tr|A0A2I6S9K3|A0A2I6S9K3\_9RHOO  
tr|A0A2M7Y3H3|A0A2M7Y3H3\_9RHOO  
tr|A0A2G2IH67|A0A2G2IH67\_COLSX  
tr|A0A261U141|A0A261U141\_9BORD  
sp|C5BRQ7|TTCA\_TERTT  
tr|A0A1N6F753|A0A1N6F753\_9PROT  
tr|A0A2E2BJH1|A0A2E2BJH1\_9GAMM  
tr|A0A2W5I668|A0A2W5I668\_9GAMM  
sp|C4L8F7|TTCA\_TOLAT  
tr|B8KS81|B8KS81\_9GAMM  
tr|Z5XT64|Z5XT64\_9GAMM  
tr|A0A0P6YKA9|A0A0P6YKA9\_VIBSP  
tr|R5E7W5|R5E7W5\_9BURK  
tr|A0A2S5KXJ5|A0A2S5KXJ5\_9PROT  
tr|Z9JMS5|Z9JMS5\_9GAMM  
tr|A0A2S2E3Y6|A0A2S2E3Y6\_9ALTE  
tr|A0A165SBD0|A0A165SBD0\_9GAMM  
tr|A0A2M9ECT5|A0A2M9ECT5\_9GAMM  
tr|A0A1A6KZA3|A0A1A6KZA3\_9VIBR  
tr|A0A2P6M725|A0A2P6M725\_9GAMM  
tr|A0A1Z9SXF6|A0A1Z9SXF6\_9GAMM  
tr|K6Y991|K6Y991\_9ALTE  
tr|H8L0D3|H8L0D3\_FRAAD  
tr|A0A2T3L8L6|A0A2T3L8L6\_9GAMM

ATN...D...KQNVVIRPLAYCAEKDIASVARQM...EFPIIIPC...D...L...CGSQ  
VSD...D...GKHVVIRPLAYIPKEDTVQWAQYQ...QFPIIIPC...N...L...CGSQ  
LSD...N...GYNIVIRPLAYCRVDDIKKYATLRL...GFPIIIPC...N...L...CGSQ  
LSD...S...KSNILIRPLAYCRESDIEEFARLKL...NYPIIIPC...N...L...CGSQ  
LSD...D...KQNVVIRPLAYCKEEDLIRFADYK...QFPIIIPC...N...L...CGSQ  
RSD...D...GRNVVIRPLAYCREKDISRFAEIQ...NYPIIIPC...N...L...CGSQ  
ISD...N...NEHIVIRPLAYCRKDIVKVFSEVK...EFPIIIPC...N...L...CGSQ  
RAD...D...GRNIVIRPLAYCREEDIRYAEHK...AFPIIIPC...N...L...CGSQ  
VSD...D...GHHVVIRPLAYSRKDIARAYAKHR...QFPIIIPC...D...L...CGSQ  
RSD...D...GRNIVIRPMAYCCERDISKYARIR...DFPIIIPC...N...L...CGSQ  
RSD...D...GKHVVIRPLAYVRADITEYADAR...QFPIIIPC...N...L...CGSQ  
TSD...D...GKNVVIRPLAYCREQDIADYAQHK...GFPIIIPC...N...L...CGSQ  
VSD...N...GEHVVIRPLAYCKEKETEYATLTK...GYPIIIPC...N...L...CGSQ  
LSD...D...QRNIVIRPLAFCRQEIAKYTEYK...QFPIIIPC...N...L...CGSQ  
LSD...D...GKHVVIRPLAYVRADDIAQYAAQR...EFPIIIPC...N...L...CGSQ  
VSD...N...GEFMOVIRPLAYVPEKDLIRWAEHR...QFPIIIPC...T...L...CGSQ  
RSD...D...GANVVIRPLAYARKDIAEYASMK...AFPIIIPC...N...L...CGSQ  
ISD...D...GKQIVIRPLAYCRKDIARAYAEAK...KFPIIIPC...N...L...CGSQ  
VSD...D...GKNMVIRPLAYARKDIAEYAEELR...EFPIIIPC...N...L...CGSQ  
QSD...D...GTNVVIRPLAYLAREDIRYAVAK...GFPIIIPC...N...L...CGSQ  
LSD...D...KRNVIRPLAYCRESLITFADYK...QFPIIIPC...N...L...CGSQ  
RAS...D...GRNIVIRPLAYCKESDLIAYAKAK...QFPIIIPC...N...L...CGSQ  
LSD...D...GRNIVIRPLAYCREKDIAAFAFGFK...QFPIIIPC...N...L...CGSQ  
VSD...N...GEHVVIRPLAFCRKDIARVSEAM...AFPIIIPC...N...L...CGSQ  
LSD...D...GRNMVIRPLAYCREADIADFARLM...EFPIIIPC...N...L...CGSQ  
KSD...D...GKHIVIRPLAYCKEKDIAKFAKLK...EFPIIIPC...N...L...CGSQ  
RSD...D...GKHVVIRPLAYVRESIDIASYAEVR...GFPIIIPC...N...L...CGSQ  
KSD...D...GKHIVIRPLAYCKEKDIAEFKAKK...EFPIIIPC...N...L...CGSQ  
VTD...N...GEHIVIRPLAYCREKDIAYAVAR...EYPIIIPC...N...L...CGSQ  
LSD...D...AKNIVIRPLAYCKEADIAEFYSRQM...AYPIIIPC...N...L...CGSQ  
LSD...N...GEHVVIRPLAYCREKDIARAYAEAK...AFPIIIPC...N...L...CGSQ  
LSD...D...GKHVVIRPLAYVRADDIEQYAEIK...DFPIIIPC...N...L...CGSQ  
LSD...D...GRHVVIRPLAYVREEDIVQYAAAR...QFPIIIPC...N...L...CGSQ  
LSD...D...GKNMVIRPLAYARKDIAYAYSELRL...QFPIIIPC...N...L...CGSQ  
LSD...N...GKHVVIRPLAYVREDDIAAYADAK...GFPIIIPC...N...L...CGSQ  
ISD...D...GKNTVIRPLSYVPEEMIVHFAKHK...QWPLIIPC...S...L...CGSRQ  
QSD...D...GTNVVIRPLAYLAREDIRYAAAK...GFPIIIPC...N...L...CGSQ  
LSD...D...GANIVIRPLXYCKEVXLIIXYAELO...AFPIIIPC...N...L...CGSQ  
LSD...D...KKHIVIRPLAYCKEKDIEAFSKAK...EYPIIIPC...N...L...CGSQ  
ISD...N...GEHIVIRPLAYCKEKDIEKYSVAK...GFPIIIPC...N...L...CGSQ  
ATN...R...GQFMVIRPLAYCSKDIASVARQM...EFPIIIPC...D...L...CGSQ  
VSD...N...GEHVVIRPLVYCKEKDIEQYSIAK...GFPIIIPC...N...L...CGSQ  
VSD...D...GKHIVIRPLAYCKEKDLAAAYAMA...DFPIIIPC...N...L...CGSQ  
VSD...D...GKHMVIRPLAYCREKDIKYSSEAK...GFPIIIPC...N...L...CGSQ  
LSD...D...KRNVIRPLFNCSKDLIAFAEAR...QFPIIIPC...N...L...CGSQ  
QSD...D...FDNIVIRPLSYCREVDIEEYATLRL...AFPIIIPC...N...L...CGSQ  
RSD...D...GKHTVIRPLALNDESDLAKYATAM...QFPIIIPC...N...L...CGSQ  
ASD...D...GQHMVIRPLAYCKEADIEEYAEHK...EFPIIIPC...N...L...CGSQ  
ATD...T...GEHIVIRPLAYCAEKDIATYARHM...AFPIIIPC...D...L...CGSQ  
RSD...D...GRNTVIRPLAYCREKDLERFAELRL...NYVPIIPC...N...L...CGSQ  
RSD...D...GRNVVIRPLAYCREKDI LRLADLM...EFPIIIPC...N...L...CGSQ  
LSD...D...KRNVIRPLAYCGEQDIEQYASIR...AFPIIIPC...N...L...CGSQ  
RSD...D...GRNIVIRPLAYCREKDI TRFSEQL...EFPIIIPC...N...L...CGSQ  
VSD...D...GKNMVIRPLAYARKDI AEYAMLK...EFPIIIPC...N...L...CGSQ  
VSD...D...GKQMVIRPLAYCAEKDIDRYSQHM...QFPIIIPC...N...L...CGSQ  
KSD...N...NEHVIIRPLAYAKKEIEEFSSQLK...GFPIIIPC...N...L...CGSQ  
LSD...N...GRHIVIRPLAYCREKDLITYAHLK...AFPIIIPC...N...L...CGSQ  
RSD...D...GRNVVIRPLTYARKDLIQYAEHK...DFPIIIPC...N...L...CGSQ  
LSD...D...GRHIVIRPLAYVAADIEYQAQM...GFPIIIPC...N...L...CGSQ  
STN...D...RQNVIRPLAYCSKDIASVARQM...GFPIIIPC...D...L...CGSQ  
ATN...D...KRNVIRPLAYCSERDIASVARQM...DFPIIIPC...D...L...CGSQ  
LTD...D...GAHTVVRPLAYCAEKDIARAYARAM...EFPIIIPC...N...L...CGSQ  
FSD...D...GRNTVIRPLAYSRKDIARAYATLRL...EYPIIIPC...N...L...CGSQ  
VSD...N...GEHVVIRPLAYARKDISRYAEQM...QFPIIIPC...N...L...CGSQ  
MSD...N...GEHVVIRPLAFCKEELAQYANLK...NFPIIIPC...N...L...CGSQ  
LSD...D...KRNVIRPLAYCRETDLIAKYKYK...QFPIIIPC...N...L...CGSQ  
ATN...R...GEFMOVIRPLAYCAEKDIASYARGM...QFPIIIPC...D...L...CGSQ  
MSD...D...GQHMVIRPLAYCKEADISAYAQOK...EFPIIIPC...N...L...CGSQ  
RSD...D...GQHIVIRPLAYVSEADISAYAQAR...AFPIIIPC...T...L...CGSQ  
LSD...D...GKHVVIRPLAYVRESIDIEYADAR...QFPIIIPC...N...L...CGSQ  
LND...S...GQHIVIRPLAYCREDDIAKYAQAL...QFPIIIPC...D...L...CGSQ  
ATN...K...GEFHVIRPLAYCAEKDIASYARGM...NFPIIIPC...D...L...CGSQ  
VSD...D...GKQMVIRPLAYCAEQDISAYSQHL...EFPIIIPC...N...L...CGSQ  
RSD...D...GRNVVIRPLAYCRETDLIQYAESK...KFPIIIPC...N...L...CGSQ  
VSD...D...GKHVVIRPLCYVTETDTRRWSELO...GFPIIIPC...N...L...CGSQ  
HSN...D...GRNTVIRPLAYSRKDIARFAQLRL...GYPIIIPC...N...L...CGSQ  
LSD...D...KRNVIRPLAYCSKEDI AHFAELK...GFPIIIPC...N...L...CGSQ  
ASD...D...GQHMVIRPLAYCKEADIAAYAEHQ...KFPIIIPC...N...L...CGSQ  
VSD...D...GKNVVIRPLAYCKEKDLIRYAEVK...SFPIIIPC...N...L...CGSQ  
LSD...D...GEHVVIRPLAYCTEADIARFARM...DYPIIIPC...N...L...CGSQ  
LSD...D...GRHVVIRPLAYCREDLAEYATLRL...GFPIIIPC...N...L...CGSR  
RSD...D...GRNIVIRPLAYCREKELLAYSNLS...KHPIIIPC...N...L...CGSQ  
ATN...D...GAHVVIRPLAYCSERDI AKYQAQM...EFPIIIPC...N...L...CGSQ  
RSD...D...KRNVIRPLAYCPEDLEAFAQAR...AFPIIIPC...N...L...CGSQ  
VSD...D...GQHIVIRPLAYCKEKDLAAAYAEIA...NFPIIIPC...N...L...CGSQ  
LSD...D...GKNIVIRPLAYCREADIEEFSSQRM...AFPIIIPC...N...L...CGSQ  
LSD...D...GRHVVIRPLAYVREADIVEYSQAK...AFPIIIPC...N...L...CGSQ  
VSD...D...GKHVVIRPLAYCHKDLIRYAEWK...EFPIIIPC...N...L...CGSQ  
LSD...D...GQNVVIRPLAYCKEEDISRYAQAO...AFPIIIPC...N...L...CGSQ  
MSD...N...GEHMVIRPLAYCKEVDIEKYAERM...EFPIIIPC...N...L...CGSQ  
RSD...D...GRNVVIRPLTYCRETDLIKYAEHK...EFPIIIPC...N...L...CGSQ  
LSD...A...KEHIVIRPLVYLRKDLARWCRIK...GYDVIP...K...L...CGAD  
VSD...D...GENIVIRPLAYCREKDIARFAMLK...EFPIIIPC...N...L...CGSQ  
RSD...N...GKHVVIRPLAYVTADIVAYANTR...RFPIIIPC...N...L...CGNQ  
VSD...D...GQHMVIRPLAYCSKDLARFAEVM...AFPIIIPC...N...L...CGSQ  
LSD...D...GRNIVIRPLAYNRKDIERFADIM...EYPIIIPC...N...L...CGSQ  
LSD...D...GKHVVIRPLAYVAADIEAYAAHK...GFPIIIPC...N...L...CGSQ  
RSD...D...GRNVVIRPLTYCREKDLIAYAEHR...EFPIIIPC...N...L...CGSQ  
RSD...D...GEHVVIRPLATCREADLIAYADWK...AFPIIIPC...T...L...CGSQ  
LSD...D...KRNVIRPLAYCKEABIERAYALA...DFPIIIPC...D...L...CGSQ  
VSD...D...GKQHVIRPLAYCAEQEISQYDLL...EFPIIIPC...N...L...CGSQ  
QSD...D...GRHIVIRPLAYCREDEIASQYADQR...QFPIIIPC...N...L...CGSQ  
RSD...D...QRNVVIRPLTYCREKDLIAYAEYR...EYPIIIPC...N...L...CGSQ

tr|A0A1V5G325|A0A1V5G325\_9PROT  
tr|A0A290XB88|A0A290XB88\_9GAMM  
tr|A0A1I2H4G4|A0A1I2H4G4\_9GAMM  
tr|A0A176H235|A0A176H235\_9GAMM  
tr|A0A2E8YFG2|A0A2E8YFG2\_9GAMM  
tr|A0A2D7P2I3|A0A2D7P2I3\_9GAMM  
tr|A0A0P9FV53|A0A0P9FV53\_9GAMM  
tr|C1CXB7|C1CXB7\_DEIDV  
tr|A0A1T4S3B8|A0A1T4S3B8\_9GAMM  
tr|A0A1M5LQ2A|A0A1M5LQ2A\_9GAMM  
tr|H8GP88|H8GP88\_METAL  
tr|A0A2D8J379|A0A2D8J379\_9ALTE  
tr|A0A1S8CV92|A0A1S8CV92\_9GAMM  
tr|A0A086D1F6|A0A086D1F6\_9GAMM  
tr|A0A2K8KNB1|A0A2K8KNB1\_9GAMM  
sp|Q9PFT8|TTCA\_XYLF  
tr|A0A2E1NM27|A0A2E1NM27\_9GAMM  
tr|A0A0P7XJ61|A0A0P7XJ61\_9GAMM  
tr|W6M556|W6M556\_9GAMM  
tr|A0A2D4SCQ4|A0A2D4SCQ4\_9GAMM  
tr|A0A1X9NHT9|A0A1X9NHT9\_9GAMM  
tr|A0A2E0A0S2|A0A2E0A0S2\_9GAMM  
tr|M5E4J8|M5E4J8\_9GAMM  
tr|G4QHE8|G4QHE8\_GLANF  
sp|Q9RXK35|TTCA\_DEIRA  
tr|A0A2T6E6Y1|A0A2T6E6Y1\_9GAMM  
tr|A0A1H8FZ23|A0A1H8FZ23\_9PROT  
sp|B4SRP3|TTCA\_STRM5  
tr|A0A014NTY8|A0A014NTY8\_9GAMM  
tr|A0A1Q6CN14|A0A1Q6CN14\_9GAMM  
tr|A0A2G6D781|A0A2G6D781\_9PROT  
tr|A0A2U9T3K6|A0A2U9T3K6\_9GAMM  
tr|A0A1I4A399|A0A1I4A399\_9PROT  
tr|B5JXV2|B5JXV2\_9GAMM  
tr|A0A072NBD9|A0A072NBD9\_9DEIO  
tr|A0A1Z8NXD9|A0A1Z8NXD9\_9PROT  
tr|A0A0D8CMH3|A0A0D8CMH3\_9GAMM  
tr|A0A0M2KFK4|A0A0M2KFK4\_9GAMM  
tr|K2AE11|K2AE11\_9ZZZZ  
tr|A0A0R0ALL0|A0A0R0ALL0\_9GAMM  
tr|R9PKE0|R9PKE0\_AGAAL  
tr|A0A1M7YUB2|A0A1M7YUB2\_9VIBR  
tr|A0A1T5I0D4|A0A1T5I0D4\_9GAMM  
tr|A0A128EXQ3|A0A128EXQ3\_9GAMM  
tr|A0A1S1MUF5|A0A1S1MUF5\_9GAMM  
tr|A0A2X5R8S2|A0A2X5R8S2\_9GAMM  
tr|A0A2N1CXC2|A0A2N1CXC2\_9PSED  
tr|A0A2G2H2M8|A0A2G2H2M8\_9GAMM  
tr|A0A2E4YG76|A0A2E4YG76\_9GAMM  
tr|A0A2G2Q5X8|A0A2G2Q5X8\_9GAMM  
tr|A0A220SM96|A0A220SM96\_9GAMM  
tr|A0A2D6RID9|A0A2D6RID9\_9GAMM  
tr|A0A1Q4C5T9|A0A1Q4C5T9\_9PROT  
tr|A0A2U3BB10|A0A2U3BB10\_9VIBR  
tr|A0A2T5JZ22|A0A2T5JZ22\_9PROT  
tr|A0A1H7BB07|A0A1H7BB07\_9DEIO  
tr|A0A286D8I8|A0A286D8I8\_9GAMM  
tr|A0A2E5MLP7|A0A2E5MLP7\_9ALTE  
tr|A0A1E5CLD3|A0A1E5CLD3\_9VIBR  
tr|A0A246B188|A0A246B188\_9DEIO  
tr|A0A2E0TPH4|A0A2E0TPH4\_9DELT  
tr|A0A2N1X999|A0A2N1X999\_9GAMM  
tr|A0A1G0F8Z3|A0A1G0F8Z3\_9GAMM  
tr|A0A2G6L227|A0A2G6L227\_9GAMM  
tr|A0A256CJ46|A0A256CJ46\_9GAMM  
tr|A0A2E0YVC0|A0A2E0YVC0\_9GAMM  
tr|A0A0C5V547|A0A0C5V547\_9GAMM  
tr|A0A1Y6BYG6|A0A1Y6BYG6\_9ALTE  
tr|A0A1Q3VUA6|A0A1Q3VUA6\_9PROT  
tr|A0A2G6L2U7|A0A2G6L2U7\_9GAMM  
tr|A0A1U7NY21|A0A1U7NY21\_9DEIO  
tr|A0A1Z8RH77|A0A1Z8RH77\_9GAMM  
tr|A0A2E3A5V1|A0A2E3A5V1\_9BACT  
tr|A0A2N5Y4E4|A0A2N5Y4E4\_9GAMM  
tr|A0A1E5A1Z7|A0A1E5A1Z7\_9GAMM  
tr|A0A0F7JQ50|A0A0F7JQ50\_9DEIO  
tr|A0A1H9G1B6|A0A1H9G1B6\_9GAMM  
tr|A0A136JWK1|A0A136JWK1\_9BACT  
tr|A0A2T3W7G0|A0A2T3W7G0\_9DEIO  
tr|A0A1Y0FU52|A0A1Y0FU52\_9GAMM  
tr|A0A2G6EXR6|A0A2G6EXR6\_9GAMM  
tr|A0A091B674|A0A091B674\_9GAMM  
tr|A0A2P1PY19|A0A2P1PY19\_9GAMM  
tr|A0A1G5EWZ9|A0A1G5EWZ9\_9GAMM  
tr|A0A2E1XG70|A0A2E1XG70\_9PROT  
tr|A0A2N5WYR8|A0A2N5WYR8\_9GAMM  
tr|A0A2I7N8U4|A0A2I7N8U4\_9NEIS  
tr|A0A2D9T881|A0A2D9T881\_9DELT  
tr|A0A2R8CL99|A0A2R8CL99\_9GAMM  
tr|A0A1G0CRC9|A0A1G0CRC9\_9PROT  
tr|A0A1J4ZIL9|A0A1J4ZIL9\_9PROT  
tr|A0A2E5Q4D6|A0A2E5Q4D6\_9PROT  
tr|A0A2E6R9S7|A0A2E6R9S7\_9GAMM  
tr|A0A1S1NZJ4|A0A1S1NZJ4\_9GAMM  
tr|U1JQ15|U1JQ15\_9GAMM  
tr|A0A1R4HE06|A0A1R4HE06\_9GAMM  
tr|A0A2D8WQ79|A0A2D8WQ79\_9GAMM  
tr|A0A221SZ95|A0A221SZ95\_9DEIO  
tr|F5SUP2|F5SUP2\_9GAMM  
tr|A0A0ROCZ1|A0A0ROCZ1\_9GAMM  
tr|A0A1H7YBV0|A0A1H7YBV0\_9GAMM  
tr|A0A2E9A969|A0A2E9A969\_9ALTE  
tr|A0A2A2I661|A0A2A2I661\_9ALTE

RS.D..D..GKHI|VIRPLAY|CA|EADI|AA|YAEAR..QF|PII|PC|.N...|L|CGSQ  
RS.D..D..GKHV|VIRPLAY|AA|EADI|AA|YADAM..AF|PII|PC|.N...|L|CGSQ  
LD.D..D..GANNV|VIRPLAY|CR|ERDI|AA|YAQAR..GF|PII|PC|.N...|L|CGSQ  
LD.D..D..KRNV|VIRPLAY|CR|EKDI|EQ|FALVK..AY|PII|PC|.N...|L|CGSQ  
RSE.D..D..QONV|VIRPLAY|CR|ERDI|ER|YAESR..QF|PII|PC|.Q...|L|CGSQ  
LD.D..D..KQNI|VIRPLAY|CK|ETDI|ERYASQQ..GF|PII|PC|.N...|L|CGSQ  
LD.D..D..GQHM|VIRPLAY|CK|EKDI|VK|YAEAK..EF|PII|PC|.N...|L|CGSQ  
QSD.D..D..GTNV|VIRPLAY|VA|ESDI|IR|YAQAR..EF|PII|PC|.N...|L|CGTQ  
LD.D..N..GRHV|VIRPLAY|VA|EADI|AR|YARLK..EF|PII|PC|.N...|L|CGSQ  
QSD.D..D..GRNI|VIRPLAY|CR|ESDI|AE|YARQR..AF|PII|PC|.N...|L|CGSQ  
LD.D..D..RKNI|VIRPLAY|CR|EKDI|ER|FSAFK..NF|PII|PC|.N...|L|CGSQ  
KSD.D..D..GRNV|VIRPLAY|CR|ERDI|ER|YAEAMR..QF|PII|PC|.N...|L|CGSQ  
LST.D..D..KKNI|LIRPLAY|VA|EKDI|IK|YAQMR..QF|PII|PC|.N...|L|CGSQ  
LD.D..D..KKNI|VIRPLAY|CR|EADI|AE|YARLM..DF|PII|PC|.N...|L|CGSQ  
LD.D..S..QTNV|LIRPLAY|CR|EADI|AR|FSSLM..NY|PII|PC|.N...|L|CGSQ  
RSD..N..GKHV|VIRPLAY|VS|ETDI|IA|YADAR..EF|PII|PC|.N...|L|CGSQ  
LD.D..D..RKNV|VIRPLAY|CR|VDI|ER|YALQO..QY|PII|PC|.N...|L|CGSQ  
VSD..N..GEHI|VIRPLAY|VK|EKDI|ER|YARAM..QY|PII|PC|.N...|L|CGSQ  
LD.D..D..GRHV|VIRPLAY|CE|END|LAS|YAEIR..QF|PII|PC|.N...|L|CGSQ  
RSD..D..D..GANNV|VIRPLAY|CS|ERDI|EK|WATLQ..DY|PII|PC|.N...|L|CGSQ  
LD.D..D..KRNV|VIRPMAY|CK|EADI|ER|YASIK..QF|PII|PC|.N...|L|CGSQ  
LD.D..D..KKHI|LIRPLSY|CK|EKDI|EA|FAEAK..EF|PII|PC|.N...|L|CGSQ  
LD.D..D..KKHV|LIRPLAY|CK|ETDI|EAY|SNAK..EF|PII|PC|.N...|L|CGSQ  
LD.D..D..KRNI|VIRPMAY|CR|EKDI|VR|FAELN..EY|PII|PC|.N...|L|CGSQ  
QSD.D..D..GTNV|VIRPLAY|VA|EADI|IR|YAQAR..EF|VPI|PC|.N...|L|CGAQ  
LD.D..S..GTNV|LIRPLAY|CR|EDDI|EQ|YAIER..EF|PII|PC|.N...|L|CGSQ  
VSD..D..D..GRHI|VIRPLAY|CR|EKDI|AT|YAESA..AF|PII|PC|.N...|L|CGSQ  
LD.D..D..GQHV|VIRPLAY|VR|HDI|AE|YAQAR..RF|PII|PC|.T...|L|CGSQ  
RSD..D..D..ERNV|VIRPLAY|CR|EKDI|IR|YTEYK..NF|PII|PC|.N...|L|CGSQ  
LD.D..D..KRNI|LIRPLAY|CR|EKDI|AT|LAEIN..DY|PII|PC|.N...|L|CGSQ  
ISD.D..D..GKNI|VIRPLAY|CK|EADI|KA|YASAM..NF|PII|PC|.N...|L|CGSQ  
LD.D..N..GKHV|VIRPLSY|VR|EDDI|AR|YAEIK..RF|PII|PC|.N...|L|CGSQ  
VSD..D..D..GRHI|VIRPLAY|CK|EKDI|AT|YAQTA..DF|PII|PC|.N...|L|CGSQ  
LD.D..D..GKNN|VIRPLAY|CK|EADI|AD|YAEAK..DF|PII|PC|.N...|L|CGSQ  
QSD..D..D..GTNV|VIRPLAY|LA|ERDI|ER|YAVAK..GF|PII|PC|.N...|L|CGSQ  
KSD..N..GEHI|VIRPLAY|CK|EKDI|VA|YAEIK..QF|PII|PC|.D...|L|CGSQ  
LD.D..D..KRNI|VIRPLAY|CR|EKDI|IS|YAEKR..EF|PII|PC|.N...|L|CGSQ  
RSD..D..D..GRNV|VIRPLAY|CR|EKDI|IR|YAQHK..NY|PII|PC|.N...|L|CGSQ  
LD.D..S..KRHI|VIRPLAY|CQ|ESDI|IE|YAEKQ..AY|PII|PC|.T...|L|CGSQ  
RSD..D..D..GKHV|VIRPLAY|VA|ERDI|VD|YAQAR..QF|PII|PC|.N...|L|CGSQ  
VSD..D..D..GKHV|VIRPMAY|CK|ESDI|ME|KYAEIK..SF|PII|PC|.N...|L|CGSQ  
RSD..D..D..ERNI|VIRPLSY|CR|EKDI|IR|YANAK..QF|PII|PC|.N...|L|CGSQ  
RSD..D..D..GRNV|VIRPLTY|CR|EKDI|IK|YAEYK..QF|PII|PC|.N...|L|CGSQ  
RSD..D..D..GRNV|VIRPLTY|CR|EKDI|VK|YAEHK..NF|PII|PC|.N...|L|CGSQ  
RSD..D..D..GRNV|VIRPLTY|CR|EDDI|IR|YAQHK..DF|PII|PC|.N...|L|CGSQ  
RSD..D..D..GRNV|VIRPLTY|CR|EKDI|IR|FADHK..AF|PII|PC|.N...|L|CGSQ  
LD.D..D..KRNI|VIRPLTY|CR|EKDI|AK|VAADS..AY|PII|PC|.N...|L|CGSQ  
RSD..D..D..NRNV|VIRPLAY|CR|EKDI|IE|FSALK..EY|PII|PC|.N...|L|CGSQ  
RSD..D..D..NRNV|VIRPLAY|CR|EKDI|IE|FARYK..QY|PII|PC|.N...|L|CGSQ  
RSD..D..D..NKNV|VIRPLAY|CR|EKDI|VR|FARYK..DF|PII|PC|.N...|L|CGSQ  
RSD..D..D..NRNV|VIRPLAY|CR|EKDI|IR|FSAYK..RF|PII|PC|.N...|L|CGSQ  
RAD..D..D..NRNT|VIRPLSY|CR|EADI|AR|YAQIR..EY|PII|PC|.N...|L|CGSQ  
RSD..D..D..GRNI|VIRPLAY|CK|EKDI|AA|YAEEM..NF|PII|PC|.N...|L|CGSQ  
VSD..D..D..GRNV|VIRPLTY|CR|EKDI|IR|FAEHK..NF|PII|PC|.N...|L|CGSQ  
VSD..D..D..GKNI|VIRPLAY|CK|EKDI|AA|YAEEM..NF|PII|PC|.N...|L|CGSQ  
QSD..D..D..GTNV|VIRPLAY|VA|EADI|IR|YAEAR..RF|PII|PC|.N...|L|CGSQ  
LD.D..D..GRHV|VIRPLAY|VR|EADI|AD|YAQAR..QF|PII|PC|.N...|L|CGSQ  
KSD..D..D..GRNV|VIRPLAY|AR|EKDI|ER|YAEELR..SF|PII|PC|.N...|L|CGSQ  
RSD..D..D..GRNV|VIRPLTY|CR|EKDI|IR|YAEHQ..QF|PII|PC|.N...|L|CGSQ  
QSD..D..D..GTNV|VIRPLAY|VP|EADI|IR|YAHAR..AF|PII|PC|.N...|L|CGSQ  
TTD..D..D..GRFQ|VIRPLIE|CD|EARI|AE|YAQLV..GF|PII|PC|.N...|L|CGSQ  
LD.D..D..KRNI|VIRPLAY|CR|EKDI|AK|VAADA..EY|PII|PC|.N...|L|CGSQ  
LD.D..D..GKHI|VIRPLAY|CT|EQDL|AR|YAAHR..QF|PII|PC|.N...|L|CGSQ  
RSD..N..GKHV|VIRPLALND|ESDI|AK|YAAAM..AF|PII|PC|.N...|L|CGSQ  
RSD..D..D..ADNI|VIRPLSY|CS|EADI|AA|YAQLR..EF|PII|PC|.N...|L|CGSQ  
LD.D..D..RQNV|VIRPLAY|CR|EKDI|AR|FAAYK..DF|PII|PC|.N...|L|CGSQ  
LAD..S..D..GRNI|LIRPMAY|CQ|EEDI|AR|YAEIK..EF|PII|PC|.N...|L|CGSQ  
LAD..D..D..KRNI|VIRPLAY|CT|EQDL|DD|FQAQK..NF|PII|PC|.N...|L|CGSQ  
VTD..D..D..GAHV|VIRPLAY|CA|EADI|AR|FARGM..EY|PII|PC|.N...|L|CGSQ  
QSD..D..D..KRHI|VIRPLALNE|EKDI|AK|YAKAM..KF|VPI|PC|.N...|L|CGSQ  
SSD..D..D..GENV|VIRPLAY|VA|EADI|QR|YADAR..AF|PII|PC|.T...|L|CGSQ  
LD.D..D..GHNV|VIRPLAY|CR|EKDI|AE|YAALS..EF|PII|PC|.N...|L|CGSQ  
RTQ..D..D..KRFE|VIRPLIE|CS|EKDI|ER|HSLSR..GY|PII|PC|.N...|L|CGSQ  
LD.D..D..RRNV|VIRPMAY|CK|EKDI|AA|YADYK..QF|PII|PC|.N...|L|CGSQ  
RSD..D..D..GKNV|VIRPLAY|CK|EKDI|EL|YAAQK..EY|PII|PC|.D...|L|CGSQ  
QSD..D..D..GTNV|VIRPLAY|VA|EADI|IR|YAQAR..QF|PII|PC|.N...|L|CGSQ  
VSD..D..D..GKNN|VIRPLAY|AR|EKDI|AA|YAEAMR..GF|PII|PC|.N...|L|CGSQ  
RSD..D..D..GRNT|LIRPLAY|VH|EKDI|VE|YAEEO..QF|PII|PC|.N...|L|CGSQ  
QSD..D..D..GTNV|VIRPLAY|VA|EADI|IR|YAQAR..AF|PII|PC|.N...|L|CGSQ  
LAD..D..D..KRNI|LIRPLAY|CR|EADI|AR|FAEAK..GF|PII|PC|.N...|L|CGSQ  
RSD..D..D..GRHI|VIRPLALVE|EKDI|TK|YAEIK..AF|PII|PC|.N...|L|CGSQ  
ASD..D..D..GEHV|VIRPLIT|CR|EADI|IE|YADWK..QF|PII|PC|.T...|L|CGSQ  
RSD..D..D..GKHI|VIRPLAY|CA|ETDI|AD|YAEAM..AF|PII|PC|.N...|L|CGSQ  
LD.D..N..KKHI|VIRPMCY|VQ|EKDI|IL|FAKEQ..SF|PII|PC|.N...|L|CGSQ  
IND..E..D..GDLY|VIRPLIL|CA|ENDI|AK|FAAAM..QF|PII|PC|.N...|L|CGSQ  
LAD..D..D..KKNV|VIRPLAY|CK|EKDI|AR|LALEYK..EF|PII|PC|.N...|L|CGSQ  
VSD..D..D..GSNV|VIRPLAY|CA|EKDI|AR|YAMIK..EF|PII|PC|.N...|L|CGSQ  
TTD..D..D..GRFQ|VIRPLIE|CD|EARI|AE|LAGLL..EF|PII|PC|.N...|L|CGSQ  
LD.D..D..GKNI|VIRPMAY|CS|EADI|VR|FSEAM..AF|PII|PC|.N...|L|CGSQ  
VTD..K..D..GDHI|VIRPLAY|CA|EKDI|AR|YARGM..EF|PII|PC|.N...|L|CGSQ  
VTD..K..D..GDHI|VIRPLAY|CV|EKDI|AR|YARGM..EF|PII|PC|.N...|L|CGSQ  
LD.D..D..DGNV|VIRPLAY|CS|EKDI|AR|YASLQ..GF|PII|PC|.H...|L|CGSQ  
KSD..D..D..GDNI|VIRPLAY|CR|ESDI|EK|LAETR..DY|PII|PC|.N...|L|CGSQ  
LD.D..D..NRNI|VIRPLAY|CS|EQDI|AS|FAEAM..AF|PII|PC|.N...|L|CGSQ  
RSD..D..D..GRNV|VIRPLTY|CR|EDDI|IS|YAEYK..QF|PII|PC|.N...|L|CGSQ  
LD.D..D..KKNI|LIRPLAY|CR|EKDI|ER|FSAFK..NF|PII|PC|.N...|L|CGSQ  
LAD..D..D..KRNV|LIRPLAY|CK|EQDL|AD|FAEYK..AF|PII|PC|.N...|L|CGSQ  
QSD..D..D..GANNV|VIRPLAY|VP|ETDI|VR|YAQAR..AF|PII|PC|.N...|L|CGSQ  
LD.D..D..KTNI|VIRPLAY|AQ|ESDI|AR|YAEAM..KF|PII|PC|.N...|L|CGSQ  
RSD..D..D..GQHV|VIRPLAY|VS|ESDI|SA|YADQO..RF|PII|PC|.T...|L|CGSQ  
LD.D..D..GRHV|VIRPLIT|TVR|EADI|VQ|YAEAR..RF|PII|PC|.T...|L|CGSQ  
KSD..D..D..GRHV|VIRPLAY|CR|ESDI|AD|YAHAM..QF|PII|PC|.N...|L|CGTQ  
RSD..D..D..GRNQ|VIRPLAY|AR|EADI|AR|YAEELR..EY|PII|PC|.N...|L|CGSQ



tr|A0A2E9LY13|A0A2E9LY13\_9GAMM  
tr|A0A1Z8WWD5|A0A1Z8WWD5\_9GAMM  
tr|A0A0F9MI56|A0A0F9MI56\_9ZZZZ  
tr|T1CTQ3|T1CTQ3\_9ZZZZ  
tr|A0A2E2U047|A0A2E2U047\_9GAMM  
tr|A0A2E6P5P0|A0A2E6P5P0\_9GAMM  
tr|FORNE2|FORNE2\_DEIPM  
tr|A0A0G9HE90|A0A0G9HE90\_9GAMM  
tr|A0A2E0Y598|A0A2E0Y598\_9GAMM  
tr|A0A2E1LHL9|A0A2E1LHL9\_9PROT  
tr|A0A1Y5EW57|A0A1Y5EW57\_9GAMM  
tr|A0A2W4ST11|A0A2W4ST11\_9GAMM  
tr|A0A2E1UIK2|A0A2E1UIK2\_9GAMM  
tr|A0A0W0R3V7|A0A0W0R3V7\_9GAMM  
tr|A0A1Y6CSG3|A0A1Y6CSG3\_9GAMM  
tr|A0A2A5A3D3|A0A2A5A3D3\_9GAMM  
tr|N6WRQ1|N6WRQ1\_9ALTE  
tr|C6KUT2|C6KUT2\_9BACT  
tr|A0A250KVQ9|A0A250KVQ9\_9GAMM  
tr|A0A1G3FEZ7|A0A1G3FEZ7\_9GAMM  
tr|A0A1B2MZL9|A0A1B2MZL9\_9GAMM  
tr|A0A2D7VJ4|A0A2D7VJ4\_9GAMM  
tr|A0A2A2F9C1|A0A2A2F9C1\_9GAMM  
tr|A0A0W0VN22|A0A0W0VN22\_9GAMM  
tr|A0A2E8KD45|A0A2E8KD45\_9GAMM  
tr|V5BRF5|V5BRF5\_9GAMM  
tr|G4SXZ6|G4SXZ6\_META2  
tr|A0A2N1XMN0|A0A2N1XMN0\_9GAMM  
tr|A0A0F9TJC2|A0A0F9TJC2\_9ZZZZ  
tr|A0A1Y5DWS8|A0A1Y5DWS8\_9GAMM  
tr|A0A1I2HAE1|A0A1I2HAE1\_9GAMM  
tr|A0A1Z8VE82|A0A1Z8VE82\_9PROT  
tr|A0A2W6RX85|A0A2W6RX85\_9GAMM  
tr|A0A0L0EXB2|A0A0L0EXB2\_9GAMM  
tr|A0A2E9ZJK3|A0A2E9ZJK3\_9GAMM  
tr|A0A2T4E3N7|A0A2T4E3N7\_9PROT  
tr|A0A1Y5GPM4|A0A1Y5GPM4\_9GAMM  
tr|A0A220VEU1|A0A220VEU1\_9GAMM  
tr|A0A1Z9E398|A0A1Z9E398\_9GAMM  
tr|A0A261GIF8|A0A261GIF8\_9GAMM  
tr|A0A2E8J678|A0A2E8J678\_9GAMM  
tr|A0A2D7J8K6|A0A2D7J8K6\_9GAMM  
tr|A0A1G0D1G5|A0A1G0D1G5\_9PROT  
tr|A0A2D6DJJ6|A0A2D6DJJ6\_9GAMM  
sp|Q603C7|TTCA\_METCA  
tr|A0A2A5G2D9|A0A2A5G2D9\_9GAMM  
tr|I1XHY5|I1XHY5\_METNJ  
tr|A0A2G2LPW3|A0A2G2LPW3\_9GAMM  
tr|I8TCV9|I8TCV9\_9GAMM  
tr|A0A2E8K888|A0A2E8K888\_9GAMM  
tr|A0A1Y5FUF8|A0A1Y5FUF8\_9GAMM  
tr|A0A2E7EB10|A0A2E7EB10\_9GAMM  
tr|A0A0F9W8F1|A0A0F9W8F1\_9ZZZZ  
tr|A0A1Z9TK40|A0A1Z9TK40\_9PROT  
tr|A0A1D3RQ23|A0A1D3RQ23\_9BACT  
tr|A0A2A4AZU3|A0A2A4AZU3\_9PSED  
tr|A0A2E8CJP9|A0A2E8CJP9\_9GAMM  
tr|A0A0W0TW89|A0A0W0TW89\_9GAMM  
tr|I1YG12|I1YG12\_METFJ  
tr|A0A1Z4BZX9|A0A1Z4BZX9\_9GAMM  
tr|A0A2E5C3Z9|A0A2E5C3Z9\_9GAMM  
tr|A0A2T5MF75|A0A2T5MF75\_9GAMM  
tr|A0A1I6KR70|A0A1I6KR70\_9GAMM  
tr|S5THM5|S5THM5\_9GAMM  
tr|A0A2E5MAX8|A0A2E5MAX8\_9GAMM  
tr|A0A1G0JJJE0|A0A1G0JJJE0\_9GAMM  
tr|A0A250I8R2|A0A250I8R2\_9DELT  
tr|A0A250JI97|A0A250JI97\_9DELT  
tr|A0A2D8XZ99|A0A2D8XZ99\_9GAMM  
tr|A0A0S2KD85|A0A0S2KD85\_9GAMM  
tr|A0A0B4XNW6|A0A0B4XNW6\_9GAMM  
tr|A0A2G2Q9V3|A0A2G2Q9V3\_9GAMM  
tr|A0A133XFF6|A0A133XFF6\_9RHOO  
tr|A0A2A5CYC0|A0A2A5CYC0\_9GAMM  
tr|A0A2A5BHU1|A0A2A5BHU1\_9GAMM  
tr|E8U6F5|E8U6F5\_DEIML  
tr|A6GKC6|A6GKC6\_9DELT  
tr|M7P1R7|M7P1R7\_9GAMM  
tr|A0A0K1PVH2|A0A0K1PVH2\_9DELT  
tr|A0A0F9W6I5|A0A0F9W6I5\_9ZZZZ  
tr|A0A0R2V9H0|A0A0R2V9H0\_9PROT  
tr|A0A2G6PCZ6|A0A2G6PCZ6\_9GAMM  
tr|A0A0C1V3E1|A0A0C1V3E1\_9CYAN  
tr|A0A2U2AST5|A0A2U2AST5\_9GAMM  
tr|A0A1Y5EL08|A0A1Y5EL08\_9GAMM  
tr|A0A1X1QNJ6|A0A1X1QNJ6\_9GAMM  
tr|A0A0F7BPK4|A0A0F7BPK4\_MYXFU  
tr|A0A1G0EFZ6|A0A1G0EFZ6\_9PROT  
tr|A0A2N1YKY9|A0A2N1YKY9\_9GAMM  
tr|A0A2P8WE43|A0A2P8WE43\_9CYAN  
tr|A0P4J5|A0P4J5\_9PROT  
tr|A0A1Y1SI55|A0A1Y1SI55\_9GAMM  
tr|A0A2A5C6W6|A0A2A5C6W6\_9GAMM  
tr|A0A2P5MXA3|A0A2P5MXA3\_METSP  
tr|A0A2E0CCPF1|A0A2E0CCPF1\_9GAMM  
tr|A0A0R2TBZ4|A0A0R2TBZ4\_9GAMM  
tr|A0A2P5N529|A0A2P5N529\_METSP  
tr|A0A2E7XL11|A0A2E7XL11\_9GAMM  
tr|A0A2N6EIU6|A0A2N6EIU6\_9DELT  
tr|A0A1V8M7R8|A0A1V8M7R8\_9GAMM  
sp|Q2SK22|TTCA\_HAHCH  
tr|A0A1Z5HBC1|A0A1Z5HBC1\_9GAMM  
tr|A0A2S5TJU9|A0A2S5TJU9\_9GAMM

KSD...D...GRHI|VIRPLAY|CR|ESD|AA|YAETM...KF|PII|PC...N...|LCGTQ  
LSD...D...GNNV|VIRPLAY|CF|EKD|LS|YSEQQ...KF|PII|PC...D...|LCGSQ  
LSD...D...KTNI|VIRPMSY|AK|EAD|IAK|YSDAM...KF|PII|PC...N...|LCGSQ  
LSD...D...ESVI|VIRPLVY|CE|REI|AR|YARAM...AF|PVI|PC...K...|VCGSQ  
KSD...D...GRNI|VIRPLYY|CR|EAD|SRWSEIK...EF|PII|PC...N...|LCGSQ  
LSD...D...GDHI|VIRPLSY|CR|EKD|IAQ|YQVR...EF|PLI|PC...D...|LCGSQ  
QSD...D...GTNV|VIRPLAY|VP|ESQ|IA|YAGAR...GF|PII|PC...N...|LCGSQ  
LSD...D...GRHV|VIRPLAY|CR|EDD|AA|YADAR...AF|PII|PC...N...|LCGSQ  
KSD...D...GRHV|VIRPLYY|CR|ERL|VAR|WAHR...GF|PII|PC...N...|LCGSQ  
LTD...D...RRHV|VIRPLAY|CA|EAD|AR|FARAK...DY|PII|PC...N...|LCGTQ  
LSD...D...KTNI|VIRPLSY|SR|ESD|ER|YSQWQ...NF|PII|PC...N...|LCGSQ  
LSD...D...NKHI|VIRPLAY|CK|ERD|INE|YARLR...DF|PII|PC...N...|LCGSQ  
RSD...D...GQNI|LIRPLYY|CR|ESL|QR|WSDFR...QY|PII|PC...N...|LCGSQ  
LSD...N...KKHI|VIRPMCY|VQ|EKD|ID|YAKEL...NF|PII|PC...N...|LCGSQ  
LSD...D...RRHV|VIRPLAY|CK|ERD|AA|YAEVR...DF|PLI|PC...N...|LCGSQ  
RSD...D...GKNV|VIRPLAY|CK|EKD|AQ|YSDYK...NF|PII|PC...T...|LCGSQ  
KSD...D...GRNV|VIRPLVY|AR|EKD|ER|YAGLR...EF|PII|PC...N...|LCGSQ  
RSD...D...GANM|VIRPLYY|CR|EKD|AR|WADFR...GY|PII|PC...N...|LCGSQ  
LSD...D...RRHI|VIRPLAY|CR|EKD|EA|YARIK...AF|PII|PC...N...|LCGSQ  
RSD...D...GRHV|VIRPLAY|CR|ESD|AE|YATQR...QF|PII|PC...N...|LCGSQ  
RSD...D...GQHV|VIRPLAY|VS|ERD|AQ|HAQAR...GF|PII|PC...T...|LCGSQ  
RSD...D...GHN1|VIRPMAY|CR|EAD|LAR|YTQIR...EY|PVI|PC...N...|LCGSQ  
FSD...D...GRNT|VIRPLAY|CR|EKD|AR|FAELR...EY|PII|PC...N...|LCGSQ  
LSD...N...KKHI|VIRPMCY|VQ|EKD|MT|YAKEK...EF|PII|PC...N...|LCGSQ  
LSD...D...KRNI|VIRPMAY|CK|EAD|QR|YADYK...AF|PII|PC...N...|LCGSQ  
LSD...D...KKNI|VIRPLAY|CR|EKD|DR|FAAFK...QF|PII|PC...N...|LCGSQ  
LSD...D...KKNI|VIRPLAY|CR|EKD|QR|FAAFR...DY|PII|PC...N...|LCGSQ  
LSD...D...KTNI|LIRPLAY|CK|EAD|IR|YSNHE...QF|PII|PC...N...|LCGSQ  
LSD...D...KTNI|VIRPLSY|CK|ESD|EQ|YSQWQ...KF|PII|PC...N...|LCGSQ  
RSD...D...GRHV|VIRPLAY|CK|ESD|AE|YAGQQ...QF|PII|PC...N...|LCGSQ  
RSD...D...GRNI|VIRPLAY|CR|EAD|LAR|YAKKK...EY|PVI|PC...N...|XCGSQ  
LTD...D...KRHI|VIRPLAY|VP|EQAL|IE|FAQLK...QF|PII|PC...N...|LCGSQ  
LSD...D...KRNI|VIRPLTY|CR|EKD|AK|YAEIC...KF|PII|PC...N...|LCGSQ  
LSD...D...KRNI|VIRPLAY|CK|EKD|SL|YSDLV...NF|PII|PC...N...|LCGSQ  
VSD...N...GEHV|VIRPLAY|AR|EKD|AR|YAAAL...EF|PII|PC...N...|LCGSQ  
LSD...D...KRNI|VIRPLAN|CR|ERD|KD|YARQR...EF|PII|PC...N...|LCGSQ  
LSD...D...KRNI|VIRPLTF|CR|ESD|AK|YAKIC...QF|PII|PC...N...|LCGSQ  
KSD...D...GKHI|VIRPLAY|CS|ESD|AA|YAQAK...QF|PII|PC...N...|LCGTQ  
KSD...D...DRNI|VIRPMAY|CR|EKD|ER|YAQVR...EF|PII|PC...N...|LCGSQ  
HSD...D...GDSI|VIRPLAY|CR|EKD|DR|YAKLE...GM|PVI|PC...N...|LCGSQ  
KSD...D...GRHI|VIRPLAY|CK|ESD|ER|YASDM...QF|PII|PC...N...|LCGTQ  
LTD...D...KRNI|MIRPLVY|CQ|EKD|IA|YAESQ...DF|PII|PC...N...|LCGSQ  
LSD...D...GKNT|VIRPLAY|AR|EAD|IA|YAEIK...QF|PII|PC...N...|LCGSQ  
LSD...D...RRHI|VIRPLAY|CK|EED|IR|YARIR...AF|PII|PC...N...|LCGSQ  
LSD...N...KKHV|VIRPLAL|CK|ETD|VA|YAKIK...NY|PII|PC...N...|LCGSQ  
LSD...D...KTNI|VIRPLCYV|KESD|IR|YAEAK...AF|PII|PC...N...|LCGSQ  
LSD...D...KTNI|LIRPLAY|CK|EAD|IR|YSEQQ...QF|PII|PC...N...|LCGSQ  
LSD...D...GRNV|VIRPLSY|CR|ESD|IA|YATER...QF|PII|PC...N...|LCGSQ  
HSD...D...GDNI|VIRPLAY|CR|EKD|DR|YANLV...GM|PII|PC...N...|LCGSQ  
LSD...D...KKNI|VIRPLAY|CR|EDD|EL|LAEYK...EF|PII|PC...N...|LCGSQ  
LSD...D...KKHV|LIRPLSY|CK|EKD|QA|FADAR...EF|PII|PC...N...|LCGSQ  
LSD...D...RRNI|VIRPLSY|CR|EKD|AK|LASIV...EF|PII|PC...N...|LCGSQ  
KSD...D...GKNI|LIRPLYY|CR|EKI|QR|WTEYK...AH|PII|PC...N...|LCGSQ  
LSD...D...GQNI|LIRPLAY|CK|EKD|ET|YAEIK...QF|PII|PC...N...|LCGSQ  
LSD...D...KRNI|VIRPLAY|CR|ERD|AK|LAELN...NY|PII|PC...N...|LCGSQ  
LSD...D...RRNV|VIRPLAY|CR|ETD|TR|YAQMR...GY|PII|PC...N...|LCGSQ  
LSD...N...KKHI|VIRPLCYA|QERD|IS|AFSLEQ...AY|PII|PC...T...|LCGSQ  
LSD...D...KQNV|VIRPLAY|VK|EAD|VQ|YAAAQ...EF|PII|PC...N...|LCGSQ  
LSD...D...KKNI|VIRPLAY|CR|EKD|ER|YSAFR...KY|PII|PC...N...|LCGSQ  
LSD...D...KQNM|VIRPLAY|CK|ESD|ER|YAIK...QF|PII|PC...N...|LCGSQ  
LSD...D...GKNV|VIRPLAY|CR|QDL|LD|YADLK...QF|PII|PC...T...|LCGSQ  
RSD...D...GRHV|VIRPLAY|SR|ESD|IA|YAEQH...QF|PII|PC...N...|LCGSQ  
KSD...N...AKHI|VIRPLAY|SR|EKD|AE|FAGLK...GY|PII|PC...N...|LCGSQ  
KSD...D...GRNL|VIRPLYY|CR|ERD|LR|WAGVR...DY|PII|PC...D...|LCGSQ  
LSD...D...KQNV|LIRPMAY|CS|EIS|SR|YAKLR...GF|PII|PC...N...|LCGTQ  
KSD...D...GRNT|VIRPLCYA|P|EKD|IA|YAAAL...QF|PII|PC...D...|LCGSQ  
KSD...D...GRNT|VIRPLCYA|P|EKD|IA|FAALK...QF|PII|PC...D...|LCGSQ  
RSD...D...EKNI|LIRPLFY|CR|EKI|QR|WSQYR...SF|PII|PC...N...|LCGSQ  
LSD...D...KQNI|VIRPLAY|VA|EKD|ER|YARLR...GF|PII|PC...N...|LCGTQ  
RSD...D...GRNV|VIRPLAY|CR|EKD|EK|FAEYR...QF|PII|PC...N...|LCGSQ  
LSD...D...KTNI|LIRPLAY|SK|ESD|IA|YAEIQ...QF|PII|PC...N...|LCGSQ  
VTD...D...HAHI|VIRPLAY|CA|ESD|AK|FARGM...EF|PII|PC...N...|LCGSQ  
KSD...N...GKHI|VIRPLAY|CP|EAD|IK|FADVR...AY|PII|PC...N...|LCGSQ  
LSD...D...KTNI|LIRPLAY|CK|ESD|VL|YAEAK...QY|PII|PC...N...|LCGSQ  
QSD...D...GKNV|VIRPLAY|VA|ERD|QR|YADAA...GY|PII|PC...N...|LCGSQ  
TTD...D...VRFE|VIRPLIE|CA|EAD|IE|HASWA...KY|PII|PC...N...|LCGSQ  
LSD...D...KTNI|VIRPLAY|AR|ESD|QR|YADAR...QF|PII|PC...N...|LCGSQ  
TTD...D...GRFE|VIRPLID|CA|EAD|AE|YAVAH...EF|PII|PC...N...|LCGSQ  
LSD...D...KQNV|VIRPLAY|CS|EKD|EV|YARLR...GF|PII|PC...N...|LCGTQ  
LSD...D...KDNI|LIRPLAF|CE|EKD|IV|SYANTM...NF|PII|PC...N...|LCGSQ  
QSD...D...GEHI|VIRPLAY|CD|ERD|AK|YARLK...GF|PII|PC...N...|LCGTQ  
LTD...D...HRHI|VIRPLAY|CP|EKD|AR|YARQR...EF|PII|PC...T...|LCGSQ  
ESD...D...GENI|VIRPLTY|CS|ESD|IK|YAKLR...QF|PII|PC...N...|LCGSQ  
KSD...N...GKNI|VIRPLAY|AR|EKD|IE|FAKLK...AY|PII|PC...N...|LCGSQ  
KSD...N...GKHI|VIRPLAY|SR|EKD|AE|FAMLK...EY|PII|PC...N...|LCGSQ  
KSD...D...GRNV|VIRPLCYA|P|EKD|AK|FAELK...AF|PII|PC...D...|LCGTQ  
VTD...K...GDHI|VIRPLAY|CA|EKD|IA|YARGM...GF|PII|PC...N...|LCGSQ  
RSD...D...GKHV|LIRPLAY|CR|EKD|EK|YAAAY...EF|PII|PC...N...|LCGSQ  
LTD...D...HRHI|VIRPLAY|CP|EAD|IR|YARYC...QF|PII|PC...T...|LCGSQ  
LSD...D...KDNI|LIRPLAF|CE|EKD|MT|YANTM...NF|PII|PC...N...|LCGSQ  
RSD...D...ARNV|VIRPLAY|TR|ESD|IA|YAAIH...EY|PII|PC...N...|LCGSQ  
LSD...D...KQHI|VIRPLAY|CK|ESD|AE|FADYK...KF|PII|PC...T...|LCGNQ  
LSD...D...KQNI|VIRPLAY|CR|EKD|NR|FAAFK...KF|PII|PC...N...|LCGSQ  
RSD...D...GKNV|VIRPLAY|CC|EAD|QALSDLR...KY|PII|PC...N...|LCGSQ  
LSD...D...KRNV|VIRPLAY|CK|ERE|ER|YAEIM...DF|PII|PC...N...|LCGSQ  
LSD...D...KRNI|VIRPLAY|CR|EKD|SR|N529...NF|PII|PC...N...|LCGSQ  
LSD...D...GENV|VIRPLAY|CS|EAD|ER|YSKIT...NM|PVI|PC...N...|LCGSQ  
QAD...N...GRHT|VIRPLVY|VE|SLI|AE|YSRLR...GH|DI|IH...S...CP|VEG...  
LSD...D...GQNM|VIRPLAY|CK|EOD|IV|V8MYR...QF|PII|PC...N...|LCGSQ  
KSD...D...GRNI|VIRPLAY|CR|EKD|ER|YAGLR...EF|PII|PC...N...|LCGSQ  
LSD...D...GKNM|VIRPLAY|CK|EKD|EK|YSDFK...QF|PII|PC...N...|LCGSQ  
KSD...D...GKNV|VIRPMAY|CE|KRN|LKR|FADGM...KF|PII|PC...T...|LCGSQ

tr|A4A3N4|A4A3N4\_9GAMM  
tr|A0A2G2KAL2|A0A2G2KAL2\_9PROT  
tr|A0A2E5FBG4|A0A2E5FBG4\_9GAMM  
tr|A0A2A4SMP6|A0A2A4SMP6\_9GAMM  
tr|A0A0F6W7V0|A0A0F6W7V0\_9DELTA  
tr|A0A2FOA0K3|A0A2FOA0K3\_9GAMM  
sp|Q11U13|TTCA\_CYTH3  
tr|A0A2P5NEZ4|A0A2P5NEZ4\_METSP  
tr|E1VQC6|E1VQC6\_9GAMM  
tr|A0A2E2MTL9|A0A2E2MTL9\_9GAMM  
tr|A0A1Z9FGH1|A0A1Z9FGH1\_9GAMM  
tr|A0A1I3DY85|A0A1I3DY85\_9GAMM  
tr|A0A2E2HA01|A0A2E2HA01\_9GAMM  
tr|K2BLN4|K2BLN4\_9ZZZZ  
tr|A0A160DYR1|A0A160DYR1\_9GAMM  
tr|A0A1I1GW43|A0A1I1GW43\_9GAMM  
tr|A0A2G2QJ44|A0A2G2QJ44\_9GAMM  
tr|A0A1X1QH62|A0A1X1QH62\_9GAMM  
tr|A0A0B6X1V9|A0A0B6X1V9\_9BACT  
tr|A0A1E2VEV8|A0A1E2VEV8\_9GAMM  
tr|A0A1K1VFB2|A0A1K1VFB2\_9GAMM  
sp|Q1QZ76|TTCA\_CHRSD  
tr|A0A1Q7Y781|A0A1Q7Y781\_9BACT  
tr|A0A078MNG2|A0A078MNG2\_9PSED  
tr|A0A2E4UVU2|A0A2E4UVU2\_9GAMM  
tr|A0A2E8VQS3|A0A2E8VQS3\_9GAMM  
tr|A0A1X1QKH8|A0A1X1QKH8\_9GAMM  
tr|A0A0K0XS81|A0A0K0XS81\_9GAMM  
tr|A0A0W0XNH6|A0A0W0XNH6\_9GAMM  
tr|A0A212TD26|A0A212TD26\_9BURK  
tr|A0A2J6IVU2|A0A2J6IVU2\_9DELTA  
tr|A0A2S6F1D8|A0A2S6F1D8\_LEGPN  
tr|A0A1G0KEH2|A0A1G0KEH2\_9GAMM  
tr|A0A1Q4DS47|A0A1Q4DS47\_9GAMM  
tr|A0A0W1A0B9|A0A0W1A0B9\_9GAMM  
tr|A0A2E0K3M4|A0A2E0K3M4\_9GAMM  
tr|A0A2G2P569|A0A2G2P569\_9RHOB  
sp|B0CEK4|TTCA\_ACAM1  
tr|A0A1H8PL64|A0A1H8PL64\_9GAMM  
tr|A0A150WJT3|A0A150WJT3\_BDEBC  
tr|A0A2V8SJ7|A0A2V8SJ7\_9BACT  
tr|A0A2E0PXG2|A0A2E0PXG2\_9GAMM  
tr|A0A0W0YHS4|A0A0W0YHS4\_9GAMM  
tr|A0A0W0YX04|A0A0W0YX04\_LEGSP  
tr|A0A0W0W1A5|A0A0W0W1A5\_9GAMM  
tr|A0A2V8N211|A0A2V8N211\_9BACT  
tr|A0A2D6K8G1|A0A2D6K8G1\_9GAMM  
tr|A0A1Y0I978|A0A1Y0I978\_9GAMM  
tr|A0A2E1SSR6|A0A2E1SSR6\_9GAMM  
tr|A0A2H9SJG2|A0A2H9SJG2\_9GAMM  
tr|A0A0Q9YJP1|A0A0Q9YJP1\_9COXI  
tr|F3KCP3|F3KCP3\_9GAMM  
tr|A0A162H722|A0A162H722\_9GAMM  
tr|A0A2H0I774|A0A2H0I774\_9GAMM  
tr|H8MUK0|H8MUK0\_CORCM  
tr|A0A2A5BA99|A0A2A5BA99\_9GAMM  
tr|A0A098G0M4|A0A098G0M4\_9GAMM  
tr|A0A2D7G655|A0A2D7G655\_9GAMM  
tr|A0A2G6KVY6|A0A2G6KVY6\_9GAMM  
tr|W5WZF1|W5WZF1\_BDEBC  
tr|A0A078L0C8|A0A078L0C8\_9GAMM  
tr|G9ENU4|G9ENU4\_9GAMM  
tr|A0A2F0AMS3|A0A2F0AMS3\_9DELTA  
tr|A0A2V8RKE7|A0A2V8RKE7\_9BACT  
tr|A0A2E1TYN5|A0A2E1TYN5\_9GAMM  
tr|A0A193LJH7|A0A193LJH7\_9GAMM  
tr|A0A2E7IRI1|A0A2E7IRI1\_9GAMM  
tr|A3YAC1|A3YAC1\_9GAMM  
tr|A0A2E0VGI6|A0A2E0VGI6\_9GAMM  
tr|A0A2E8CCG6|A0A2E8CCG6\_9DELTA  
tr|A0A095VPL1|A0A095VPL1\_9GAMM  
tr|A0A0N8KMU5|A0A0N8KMU5\_9CYAN  
tr|A0A1G0HAT3|A0A1G0HAT3\_9GAMM  
tr|A0A2E5Y795|A0A2E5Y795\_9GAMM  
tr|A0A2S9Y7R6|A0A2S9Y7R6\_9DELTA  
tr|A0A1G0JMY1|A0A1G0JMY1\_9GAMM  
tr|A0A1G0G197|A0A1G0G197\_9GAMM  
tr|A0A1M4ZL39|A0A1M4ZL39\_9GAMM  
tr|A0A1A8TLI3|A0A1A8TLI3\_9GAMM  
tr|A0A1I0DVY2|A0A1I0DVY2\_9DELTA  
tr|A0A1G0Y1I3|A0A1G0Y1I3\_9GAMM  
tr|A0A084I1J91|A0A084I1J91\_9GAMM  
tr|A0A2E9EBS9|A0A2E9EBS9\_9GAMM  
tr|A0A2E3DAL8|A0A2E3DAL8\_9GAMM  
tr|A0A2D6DEC2|A0A2D6DEC2\_9GAMM  
tr|A0A1L6MYR5|A0A1L6MYR5\_9DELTA  
tr|A0A162G8Y7|A0A162G8Y7\_BDEBC  
tr|A0A1G0IDH1|A0A1G0IDH1\_9GAMM  
tr|F3L3T9|F3L3T9\_9GAMM  
tr|A0A2E4YBV6|A0A2E4YBV6\_9GAMM  
tr|A0A2D7FVG0|A0A2D7FVG0\_9GAMM  
tr|A0A2E6JDN6|A0A2E6JDN6\_9GAMM  
tr|F2K4L6|F2K4L6\_MARM1  
tr|L8M0Y2|L8M0Y2\_9CYAN  
tr|A0A165I5T6|A0A165I5T6\_9GAMM  
tr|A0A2E6UQH5|A0A2E6UQH5\_9PROT  
tr|K2B892|K2B892\_9ZZZZ  
tr|B6BVC5|B6BVC5\_9PROT  
tr|A0A1Y0RGR4|A0A1Y0RGR4\_9CYAN  
tr|A0A2E3WDT3|A0A2E3WDT3\_9GAMM  
tr|A0A2A4W638|A0A2A4W638\_9GAMM  
tr|A0A2A4WTK7|A0A2A4WTK7\_9GAMM  
tr|A0A1Y2ZWN2|A0A1Y2ZWN2\_9GAMM

LS|D..D..GKNV|VIRPMAY|CKE|AD|AR|YAEEM..QF|PII|PC..N...|L|CGSQ  
LS|D..D..GNNV|VIRPLSY|CS|EKD|IAQ|YAQLK..KF|PII|PC..N...|L|CGSQ  
KS|D..N..GKHI|VIRPLSY|SR|EKD|IAE|FAELK..QY|PII|PC..N...|L|CGSQ  
LT|D..N..KRN1|VIRPLAY|CKE|AD|IE|YAKIR..EY|PII|PC..N...|L|CGSQ  
VT|D..D..GRFR|VIRPLIE|CD|EAR|IAE|YAALB..AF|PII|PC..N...|L|CGSQ  
KS|D..K..GDHV|VIRPLAY|CR|EKD|LAR|YAADK..AF|PII|PC..N...|L|CGTQ  
RT|D..D..GKHV|VIRPLVY|CKE|NET|IAE|YSIYK..KF|PII|PC..N...|L|CGSQ  
LS|D..D..KRN1|VIRPLAY|CR|EKD|INR|YAAFR..QF|PII|PC..N...|L|CGSQ  
LS|D..D..GKHI|LIRPMAY|CKE|ODI|IE|YAAIR..EF|PII|PC..K...|L|CGSQ  
LS|D..D..KRNV|LIRPLAY|CKE|SD|VAL|FAELK..QF|PII|PC..N...|L|CGSQ  
LS|D..D..GKHV|VIRPLY|YCR|ERLI|AQ|WSNFA..QY|PII|PC..N...|L|CGSQ  
LS|D..D..GKNI|VIRPLAY|CKE|AD|IAE|FAQLM..EF|PII|PC..N...|L|CGSQ  
LS|D..D..KKHI|VIRPLAY|CR|EET|IAE|FAGLR..QF|PII|PC..T...|L|CGNQ  
LT|D..N..KKHI|VIRPLVY|CQ|EKD|IAV|YAKEQ..NF|PII|PC..N...|L|CGSQ  
RS|D..D..GRNL|VIRPLAY|CR|ETD|IAA|HAHE..GF|PII|PC..N...|L|CGSQ  
LS|D..D..GKNI|VIRPLAY|CKE|KDI|QE|FAELM..EF|PII|PC..N...|L|CGSQ  
KS|D..N..GKHI|VIRPLAY|SR|EKD|IAE|FSELK..GY|PII|PC..N...|L|CGSQ  
KS|D..N..GKHI|VIRPLAY|SR|EKD|IAE|FATLK..DY|PII|PC..N...|L|CGTQ  
RS|D..D..GRNT|IIRPLAY|CR|ERD|IAE|FAAEK..NF|PII|PC..D...|L|CGSQ  
LS|D..D..GKHI|VIRPLAY|CE|PDI|EAF|FAEAR..EF|PII|PC..N...|L|CGSQ  
LS|D..D..LKN1|LIRPLAY|CR|ERD|IAE|FATLM..EF|PII|PC..N...|L|CGSQ  
LS|D..D..GKHI|VIRPLAY|CR|EAD|IAE|YAEWR..EF|PII|PC..N...|L|CGSQ  
RS|D..D..GRNT|VIRPLSY|CR|EKI|VK|FAAEK..NF|PII|PC..D...|L|CGSQ  
RS|D..D..GRNV|VIRPLAY|CS|EKD|IEV|YAQLR..EF|PII|PC..N...|L|CGSQ  
LS|D..D..GANV|VIRPLAY|AR|KDI|IAE|YAALR..DF|PII|PC..N...|L|CGSQ  
RS|D..D..GANM|VIRPLAY|SR|EKD|IAE|YAALR..EF|PII|PC..N...|L|CGSQ  
KS|D..N..GKHI|VIRPLAY|SR|EKD|IAE|FSELK..GY|PII|PC..N...|L|CGSQ  
RS|D..D..GQHI|VIRPLAY|CL|EAD|LER|LAER..NY|PII|PC..N...|L|CGSQ  
LS|D..N..KKHI|VIRPLAY|VQ|EKD|IMT|FANEQ..AF|PII|PC..T...|L|CGSQ  
RS|D..D..GKHI|VIRPLAY|VP|EKY|LER|YAEQM..AF|PII|PC..N...|L|CGSQ  
AAD..N..GRHT|VIRPLVY|VE|EGE|IR|FSREQ..QF|PII|V|CC..A..CPV|CG..  
LS|D..N..KKHI|VIRPMCY|VQ|EKD|IT|FASEQ..AF|PII|PC..N...|L|CGSQ  
LS|D..D..GANV|VIRPLAY|CKE|ED|KAY|AQAK..KF|PII|PC..T...|L|CGSQ  
LS|D..D..KKN1|VIRPLCY|VQ|EKD|IK|FAAEK..AF|PII|PC..N...|L|CGSQ  
LS|D..N..KKHI|VIRPMCY|VQ|EKD|IT|FATEQ..EF|PII|PC..N...|L|CGSQ  
LS|D..D..QKHV|LIRPLAY|CKE|KDI|EK|FAAAR..EF|PII|PC..N...|L|CGSQ  
LS|D..D..QKHV|LIRPLAY|CKE|KDI|EK|FAEAR..GF|PII|PC..N...|L|CGSQ  
LS|D..N..RQHM|VIRPLAY|CP|EAD|IQ|RYADLR..QF|PII|PC..T...|L|CGSQ  
KSN..D..GKHV|VIRPLAY|VP|EQY|LE|QYAGHK..AF|PII|PC..N...|L|CGSQ  
KS|D..D..GRNI|LVRLTY|VS|ERD|EAL|ADVW..KF|PII|PC..N...|L|CGSQ  
RS|D..A..GTNT|IIRPLAY|CQ|ESE|IAK|YSEER..QF|PII|PC..N...|L|CGSQ  
LS|D..D..GENI|IIRPLAY|CA|IDI|KAY|AIKK..AF|PII|PC..T...|L|CGSQ  
LS|D..N..KKHI|VIRPMCY|VQ|EKD|IT|FATEQ..AF|PII|PC..N...|L|CGSQ  
LS|D..N..KKHM|VIRPLCY|VQ|ERD|IS|FANEE..NF|PII|PC..N...|L|CGSQ  
LS|D..N..KKHI|VIRPLCY|VQ|EKD|IA|FAEQ..AY|PII|PC..N...|L|CGSQ  
RSN..D..GRNT|VIRPLAY|CR|ERD|IAE|FAAGE..QF|PII|PC..D...|L|CGSQ  
LAD..D..GRNV|VIRPLAY|CR|ESD|IEA|YARLR..QF|PII|PC..N...|L|CGSQ  
KS|D..D..GRNV|LIRPLAY|CR|EKD|IER|FAKYK..QY|PII|PC..N...|L|CGSQ  
XAD..D..KKNM|VIRPLAY|CKE|SD|QAL|AELR..EY|PII|PC..N...|L|CGSQ  
LS|D..N..KKHI|VIRPMCY|VQ|EKD|IT|YAKEQ..NY|PII|PC..T...|L|CGSQ  
LS|D..N..KKHI|VIRPLSY|CQ|EKD|IAE|YAKLK..EF|PII|PC..N...|L|CGSQ  
LS|D..D..KKNV|LIRPLAY|CKE|SD|QT|FSDFK..QF|PII|PC..N...|L|CGSQ  
LS|D..D..KKNV|VIRPMAY|CKE|AD|LAE|FAQYK..EF|PII|PC..N...|L|CGSQ  
LS|D..D..QSHI|VIRPLVY|CQ|EAD|IAE|FAKLM..AF|PII|PC..N...|L|CGSQ  
KS|D..D..GRNV|VIRPLCY|AP|EKI|IQ|FAEAK..QF|PII|PC..D...|L|CGSQ  
LS|D..D..KRNV|VIRPMAY|CKE|KDI|SR|YAQLC..DF|PII|PC..N...|L|CGSQ  
LS|D..N..KKHI|VIRPMY|VQ|EKD|IA|FATAQ..AF|PII|PC..N...|L|CGSQ  
LS|D..D..ARHV|VIRPLFY|CR|EKLI|TEW|SKTR..DH|PII|PC..N...|L|CGSQ  
LS|D..D..KDNI|VIRPMAY|CKE|KDI|AQ|YADYK..AF|PII|PC..N...|L|CGSQ  
RS|D..D..GRNI|LVRLCY|VS|ERD|IEEL|GAAW..EI|PII|PC..N...|L|CGSQ  
LS|D..N..KKHI|VIRPLCY|VQ|ERD|IK|FAEEQ..AY|PII|PC..T...|L|CGSQ  
LS|D..N..KKHI|VIRPLSY|VQ|EKD|IA|FANAQ..AF|PII|PC..T...|L|CGSQ  
TT|D..D..GRFK|VIRPLIE|CA|EAD|IQD|YAQER..AF|PII|PC..N...|L|CGSQ  
RS|D..D..QRNT|IIRPLAY|CQ|EAE|IEA|YAEK..QF|PII|PC..N...|L|CGSQ  
LS|D..D..KRNV|VIRPLAY|CKE|SEI|EK|FATLM..QF|PII|PC..D...|L|CGSQ  
ISD..D..KKN1|VIRPLVY|CR|ERD|IAF|FAKER..QY|PII|PC..T...|L|CGSQ  
LS|D..D..KRN1|IIRPLAY|CR|EKD|IEK|VARDR..AY|PII|PC..N...|L|CGSQ  
LS|D..D..GRHM|VIRPLAY|CKE|KDI|EAF|SVMK..EY|PII|PC..N...|L|CGSQ  
LS|D..D..QRNI|VIRPLAY|CR|EQD|LED|YAYR..EF|PII|PC..N...|L|CGSQ  
LS|D..D..KRNV|VIRPMAY|CKE|KDI|SL|YASLA..KF|PII|PC..N...|L|CGSQ  
LS|D..D..GRHV|VIRPLAY|CKE|KDI|LA|YADIK..GF|PII|PC..N...|L|CGSQ  
LT|D..D..RRHI|VIRPLAY|CA|EKD|IA|YARYR..EF|PLI|PC..T...|L|CGSQ  
ISD..S..KKN1|VIRPMVY|CQ|ETD|IRL|YASEQ..QF|PII|PC..T...|L|CGSQ  
LS|D..D..KQHI|VIRPLCY|VQ|EKD|IT|YAKEQ..AY|PII|PC..T...|L|CGSQ  
TT|D..D..QRFE|VIRPLIE|CA|ETD|IE|HANWA..SY|PII|PC..N...|L|CGSQ  
LS|D..D..GANV|VIRPLAY|CR|ETD|IKO|YAESR..GF|PII|PC..N...|L|CGSQ  
LT|D..D..KQHI|VIRPLAY|CQ|EQD|IAS|FAQLM..GF|PII|PC..N...|L|CGNQ  
LS|D..D..GKHI|VIRPLAY|CKE|ED|IMF|SVMK..EY|PII|PC..N...|L|CGSQ  
LS|D..D..GKHM|VIRPLAY|CKE|KDI|QA|FADMK..AY|PII|PC..N...|L|CGSQ  
RS|D..D..GRNT|VIRPLCY|AP|EKI|AQ|FAELK..GF|PII|PC..D...|L|CGTQ  
LS|D..N..KKHI|VIRPLCY|VQ|ERD|IA|FAEAB..AF|PII|PC..T...|L|CGSQ  
KS|D..D..GDNV|VIRPLAY|CA|EAE|IK|YARLK..QF|PII|PC..N...|L|CGSQ  
LS|D..D..SENI|VIRPLAY|CR|EKD|IGR|YAEMC..EF|PII|PC..D...|L|CGSQ  
LS|D..D..GENI|LIRPLAY|CR|EKD|IA|RYAEIT..EF|PII|PC..N...|L|CGSQ  
LS|D..D..GKHV|VIRPLAF|CKE|SD|IEQ|YSLLK..SF|PII|PC..N...|L|CGSQ  
LNQ..K..GEQI|VIRPLTY|CS|EEM|IRQ|FSERM..NF|PII|PC..D...|L|CGMQ  
KS|D..D..ERNI|LVRLTY|VS|ERD|IEEL|AAVW..NF|PII|PC..N...|L|CGSQ  
LS|D..N..KKN1|LIRPLAY|CQ|ESD|IQ|FANLM..AF|PII|PC..T...|L|CGSQ  
LS|D..D..GKNV|IIRPLAY|CKE|SD|IER|FAQAR..AF|PII|PC..N...|L|CGSQ  
LS|D..D..KRN1|VIRPLAY|CKE|SEI|RR|FAQLS..EF|PII|PC..N...|L|CGSQ  
RS|D..D..GANI|VIRPLAY|CKE|KDI|LAR|FAEMR..EF|PII|PC..N...|L|CGSQ  
LS|D..D..KKN1|VIRPLAY|CKE|ETI|RS|YAEMV..GF|PII|PC..N...|L|CGSQ  
LS|D..D..GKHV|VIRPLAY|CKE|EDI|EK|FADYK..SF|PII|PC..N...|L|CGSQ  
LS|D..D..KQNI|IIRPLAY|CP|ERE|IVR|YANAR..QF|PII|PC..N...|L|CGSQ  
QSD..D..GDNI|LIRPLAY|CA|ESD|IQK|YADIK..EF|PII|PC..N...|L|CGSQ  
IND..T..GQHI|VIRPLVY|CKE|KDI|LEE|YANIB..IF|PII|PC..N...|L|CGSQ  
LS|D..N..KKHI|IIRPLVY|CQ|END|IAA|FAQLM..AF|PII|PC..N...|L|CGSQ  
LS|D..D..QTNI|VIRPLAY|IE|EKD|IS|FSKTM..NY|PII|PC..N...|L|CGSQ  
LS|D..D..GQHV|VIRPLAY|CS|EHD|IEQ|YAKLR..QF|PII|PC..N...|L|CGSQ  
LS|D..D..GANL|VIRPLAY|CR|EKD|IER|YAEIR..SF|PII|PC..N...|L|CGSQ  
LT|D..S..KRHI|VIRPMAY|CKE|KDI|KAY|AEQ..QY|PII|PC..N...|L|CGSQ  
LS|D..D..KRN1|VIRPLAY|CKE|KDI|SR|YAEIS..NF|PII|PC..N...|L|CGTQ  
LS|D..D..KKN1|IIRPLAY|TR|EKD|IER|FAAFK..NF|PII|PC..N...|L|CGSQ



|                                  |               |           |                       |        |            |
|----------------------------------|---------------|-----------|-----------------------|--------|------------|
| tr A0A0S2TB27 A0A0S2TB27_9GAMM   | LTD..S..QDHI  | VIRPLVY   | QEDIAEFAELM..EF       | PIIIPC | .N...LCGSQ |
| tr A0A2E3UPR5 A0A2E3UPR5_9GAMM   | LSDD..D..KRN  | VIRPLAY   | CKELIVRYAKFM..NF      | PIIIPC | .D...LCGSQ |
| tr A0A0K1PUI2 A0A0K1PUI2_9DELT   | IAQ..D..GN.V  | VIRPLAY   | CAEEDVAAFAREK..EF     | PIIIPC | .D...LCGSQ |
| tr A0A2W1MVY8 A0A2W1MVY8_9FLAO   | ETN..D..GRFV  | VIRPLAY   | VKEDIIRLSEIR..NY      | PIIIPC | .N...LCGSQ |
| tr A0A2E7LLC8 A0A2E7LLC8_9GAMM   | LSDD..D..GAHV | VIRPLY    | YVRERDIARFSGFO..QH    | PIIIPC | .N...LCGSQ |
| tr A0A1V3PAW7 A0A1V3PAW7_9GAMM   | RSDD..D..GRHV | VIRPLAY   | CRSEIEAYALR..EF       | PIIIPC | .N...LCGSQ |
| tr A0A2A5WDX1 A0A2A5WDX1_9GAMM   | LSDD..D..KRN  | VIRPLAY   | CKESEISKFSIDL..SF     | PIIIPC | .N...LCGSQ |
| tr A0A0W0X021 A0A0W0X021_9GAMM   | LSDD..D..KKHI | VIRPMCY   | VQERDIAAYATEQ..HF     | PIIIPC | .N...LCGSQ |
| tr A0A1G0IH91 A0A1G0IH91_9GAMM   | LSDD..D..KKN  | VIRPMVY   | CQESDIKAFASEQ..QF     | PIIIPC | .N...LCGSQ |
| tr A0A0C2DGF4 A0A0C2DGF4_9DELT   | TDD..D..QQFQ  | VIRPLIE   | CAESDIEHTNWA..NY      | PIIIPC | .N...LCGSQ |
| tr A0A2D5QFH6 A0A2D5QFH6_9GAMM   | LSDD..D..KKN  | VIRPLAY   | CKETDLAEYSNKM..EF     | PIIIPC | .N...LCGSQ |
| tr A0A2E4LJ98 A0A2E4LJ98_9GAMM   | LSDD..D..KRN  | VIRPLAY   | CKETELKFARLM..RF      | PIIIPC | .D...LCGSQ |
| tr A0A2E5DC90 A0A2E5DC90_9GAMM   | LSDD..D..GAHV | VIRPLY    | YVRERDITRYSEYQ..QH    | PIIIPC | .N...LCGSQ |
| tr A0A2E5FWR7 A0A2E5FWR7_9GAMM   | LSDD..D..GDNV | VIRPLSY   | CAEKDIEKFSRLS..QH     | PIIIPC | .N...LCGSQ |
| tr A0A1G0IU32 A0A1G0IU32_9GAMM   | LTD..N..KRHV  | VIRPLAF   | CQEKDIIQYASEQ..NF     | PIIIPC | .N...LCGSQ |
| tr A0A0F9U4Z6 A0A0F9U4Z6_9ZZZZ   | RSDD..D..GRNV | VIRPLAY   | CNERDIEAYARLQ..EF     | PIIIPC | .N...LCGSQ |
| tr A0A2E6YYL5 A0A2E6YYL5_9GAMM   | VSD..D..GAHV  | VIRPLY    | YVRERDIIRWNELR..QF    | PIIIPC | .N...LCGTQ |
| tr A0A1H1PAT6 A0A1H1PAT6_9PSED   | RSDD..D..GRNV | VIRPLAY   | CNESDIAAYAELO..GF     | PIIIPC | .N...LCGSQ |
| tr A0A2E8C6H5 A0A2E8C6H5_9GAMM   | RSDD..D..GRNV | VIRPLSY   | CNEVDIEAYATLQ..NF     | PIIIPC | .N...LCGSQ |
| tr A0A1H1SJ01 A0A1H1SJ01_9PSED   | LSDD..D..GRNV | VIRPLAY   | CNKKDITAYAAAMR..EF    | PIIIPC | .N...LCGSQ |
| tr A0A1G5P4B8 A0A1G5P4B8_9PSED   | RAD..D..GRNV  | VIRPLAY   | CNKKDIEAYAVLR..EF     | PIIIPC | .N...LCGSQ |
| tr A0A2E0GTV8 A0A2E0GTV8_9GAMM   | LTD..N..KKNV  | VIRPMVY   | VQEKDIIKIFADEQ..QF    | PIIIPC | .N...LCGSQ |
| tr A0A139SJ77 A0A139SJ77_9GAMM   | LSDD..D..GRNL | VIRPLACS  | CKEKDIIQAYATLK..QF    | PIIIPC | .N...LCGSQ |
| tr A0A2E3MG92 A0A2E3MG92_9GAMM   | LTD..S..KKHI  | VIRPLAY   | CQEKDIEFAKLM..AY      | PIIIPC | .N...LCGSQ |
| tr A0A2G6Q111 A0A2G6Q111_9BACT   | KND..K..GDLV  | LIRPLAL   | VPKIIIANYAQYI..EY     | PIIPA  | .G...LCGNQ |
| tr B8HNP7 B8HNP7_CYP4            | LSDD..D..GQHM | VIRPLAY   | CAEKDIERYANLR..QF     | PLIPC  | .Q...LCGSQ |
| tr A0A2E8XFZ6 A0A2E8XFZ6_9GAMM   | LSDD..D..KRN  | VIRPLAY   | CKESEISKFAELI..EF     | PIIIPC | .N...LCGSQ |
| tr A0A2D8QNY1 A0A2D8QNY1_9GAMM   | LSDD..D..GVNM | VIRPLAY   | CRKKDIIARYADLE..EF    | PVTPX  | .N...LCGSQ |
| tr A0A2N1WJ42 A0A2N1WJ42_9GAMM   | LSDD..D..GDN  | VIRPLAY   | CREODLIRLASLR..GY     | PIIIPC | .N...LCGSQ |
| tr K2ERR8 K2ERR8_9ZZZZ           | ITN..D..KKLI  | VIRPLSY   | CQESDIKYAAEQ..NF      | PLTSK  | .G...LCG.A |
| tr A0A0K1XH68 A0A0K1XH68_9GAMM   | LSDD..D..GRNV | VIRPLAY   | CKETDIAEYAEFK..EF     | PIIIPC | .N...LCGSQ |
| tr A0A1H2ES15 A0A1H2ES15_9PSED   | RSDD..D..GRNV | VIRPLAF   | CNKKDIAAYALR..EF      | PIIIPC | .N...LCGSQ |
| tr A0A177QRA8 A0A177QRA8_9GAMM   | LSDD..N..KRHI | VIRPLAY   | CQENDIIEYAKEQ..QF     | PIIIPC | .N...LCGAQ |
| tr A0A254Q4L9 A0A254Q4L9_9PROT   | RSDD..D..GRNI | LLRPLAY   | VSERDIEALAADW..NF     | PIIIPC | .N...LCGSQ |
| tr A0A2E6SWN3 A0A2E6SWN3_9FLAO   | KTD..D..GKHV  | VIRPLAY   | CKEKDIEAYSQKL..QF     | PIIIPC | .N...LCGSQ |
| tr A0A2E9AK57 A0A2E9AK57_9GAMM   | RSDD..D..GENV | VIRPLSY   | CSERDIEKYARLN..QY     | PIIIPC | .N...LCGSQ |
| tr A0A2D7F0H7 A0A2D7F0H7_9GAMM   | LSDD..D..GANV | IIRPLAY   | CRKKDITRYADLM..NF     | PIIIPC | .N...LCGAQ |
| tr A0A2E1W4P8 A0A2E1W4P8_9FLAO   | KTD..N..GKHI  | VIRPLAY   | CKEKDIEEYSKIM..EF     | PIIIPC | .N...LCGTQ |
| tr A0A2E5RQ39 A0A2E5RQ39_9FLAO   | KTD..D..GKFT  | VIRPLAY   | CKEKDIEEYSKLO..KF     | PIIIPC | .N...LCGTQ |
| tr A0A2E2TWY6 A0A2E2TWY6_9GAMM   | LTD..C..KRHI  | VIRPLAY   | ISYDIAEYAKQM..AF      | PIIIPC | .N...LCGSQ |
| tr A0A2D7KKV3 A0A2D7KKV3_9GAMM   | RSDD..D..GEHV | VIRPLAY   | CKESDILAYANVR..NF     | PIIIPC | .N...LCGSQ |
| tr A0A148NAU8 A0A148NAU8_9GAMM   | LSDD..D..KKHI | VIRPLAY   | CKEKDIAAYARLM..DF     | PIIIPC | .N...LCGSQ |
| tr A0A0C1N9Q3 A0A0C1N9Q3_9CYAN   | LSDD..D..GQHI | VIRPLAY   | CAESDIEQYANFK..KF     | PIVPC  | .S...LCGSQ |
| tr A0A098LEV0 A0A098LEV0_9BACT   | KTD..N..QEHI  | VIRPLAF   | CKEKIEKYSVAK..AY      | PIIIPC | .N...LCGSQ |
| tr A0A1Q7Z4V3 A0A1Q7Z4V3_9DELT   | RSDD..D..GRNV | VIRPLCYA  | AAESDIAAFAAEM..KF     | PLIPC  | .D...LCGSQ |
| tr H5SHT9 H5SHT9_9GAMM           | LSDD..D..KQHI | LIRPLAY   | CREADIAEYARQR..AF     | PIVPC  | .T...LCSSQ |
| tr I4CAC3 I4CAC3_DESTA           | LAD..D..CQNT  | VIRPLVY   | VKEDMTGACARL..GV      | PILGC  | .S.CTYQG   |
| tr A0A2E8MZV2 A0A2E8MZV2_9RICK   | KTD..K..EGIS  | VIRPLYS   | IEETITQYAAFO..EW      | PIVPC  | .N...LCGSQ |
| tr A0A140K524 A0A140K524_9CYAN   | LTD..D..KQHI  | VIRPLAY   | CPKEKETRYANAR..EF     | PIIIPC | .N...LCGSQ |
| tr A0A1Z9WCJ2 A0A1Z9WCJ2_9GAMM   | LSDD..D..KRN  | VIRPLAY   | CKEKDIEIRYAEAL..GF    | PIIIPC | .N...LCGTQ |
| tr V6LCA2 V6LCA2_9EUKA           | .EN..T..SNIS  | IIRPLMN   | IYEAQIIEFAKIR..QF     | PIIKC  | .N.CPSEG.D |
| tr A0A2W1JZL5 A0A2W1JZL5_9CYAN   | LTD..D..GRHV  | VIRPLAY   | CPKEDIQRYADLR..QF     | PIIIPC | .T...LCGSQ |
| tr A0A2E3WDX3 A0A2E3WDX3_9PROT   | RSDD..D..GRNL | LLRPF     | FCYVYENEDIDGORIL..SP  | PVTPX  | .N...LCGSQ |
| tr A0A2E5HLE3 A0A2E5HLE3_9DELT   | FSD..D..RRNT  | VIRPLAY   | CPKEWIEVYAKLR..GF     | PIIIPC | .T...LCSTQ |
| tr A0A2W5TG65 A0A2W5TG65_9DELT   | KSN..D..GRNT  | VIRPLAY   | APETIEARFAELM..EF     | PIIIPC | .D...LCGSQ |
| tr A0A1G0GKM6 A0A1G0GKM6_9GAMM   | LSDD..D..KKNV | IIRPLVY   | CQEKDIAAFQKM..AF      | PIIIPC | .N...LCGSQ |
| tr A0A150AGP8 A0A150AGP8_9BACT   | KTD..D..GKHV  | VIRPLAY   | CKESDIEVSELR..EY      | PIIIPC | .N...LCGSQ |
| tr A0A1S1YYD9 A0A1S1YYD9_9BACT   | KTD..D..KQHI  | VIRPLAY   | CKEKDIEEYAKLK..EF     | PIIIPC | .N...LCGSQ |
| sp A5EXQ4 TTCA_DICNV             | LSDD..N..KKQI | VIRPLVY   | CDKEDIVKYAKLK..AF     | PIIIPS | .N...LCGVQ |
| tr A0A1G0XP48 A0A1G0XP48_9GAMM   | ISD..N..KKNV  | LIRPLCY   | VQEKDIEYAKEM..SY      | PIIIPC | .T...LCGSQ |
| tr A0A1G0L2E0 A0A1G0L2E0_9GAMM   | LTD..D..KKHI  | VIRPMVY   | CQEKDIAAYAILN..AF     | PIVPC  | .G...LCNNQ |
| tr A0A1G0GM68 A0A1G0GM68_9GAMM   | LSDD..N..KKNV | VIRPLIY   | CQENDIIFASQAM..EF     | PIIIPC | .N...LCGSQ |
| tr A0A1B8TZZ0 A0A1B8TZZ0_9FLAO   | KND..A..GNLV  | VLRLP     | LSFCKESDIEYTSNHQ..NF  | PIIIPC | .N...LCGSQ |
| tr A0A2D7K8M6 A0A2D7K8M6_9FLAO   | LID..K..GDLV  | VLRLP     | LSFCKESDIEYTSRLM..EF  | PIIIPC | .N...LCGSQ |
| tr A0A2M9DVU6 A0A2M9DVU6_9DELT   | LTD..S..GKHV  | VIRPMAY   | VGKEDIRYALR..AF       | PIITG  | .D...FCGTP |
| tr A0A2E2WLC4 A0A2E2WLC4_9GAMM   | LTD..D..KQHI  | VIRPLAY   | CQENDIIRYAMEQ..AF     | PIIIPC | .N...LCGTQ |
| tr A0A1J0KT95 A0A1J0KT95_9GAMM   | LSDD..D..KRN  | VIRPLFVS  | ETETSEYAKLK..NF       | PIIIPC | .N...LCGSQ |
| tr A0A1Q2SN26 A0A1Q2SN26_9GAMM   | LSDD..N..KQHI | VIRPLAY   | CRKKDITIYAKIK..DF     | PIIIPC | .N...LCGSQ |
| tr A0A1F9PKZ9 A0A1F9PKZ9_9DELT   | LAD..N..GETT  | VIRPLVY   | VAEADITFARNL..AL      | PVVCC  | .C.CPVCG   |
| tr A0A2U2J834 A0A2U2J834_9FLAO   | KND..T..GNLV  | VLRLP     | LSFCRESDIEIYARFM..NF  | PIIIPC | .N...LCGSQ |
| tr U9W6P5 U9W6P5_9CYAN           | RTD..D..GKHI  | VIRPLAY   | CPENDIARYARYR..EF     | PIIIPC | .N...LCGSQ |
| tr A0A1E7HZ03 A0A1E7HZ03_9DELT   | LAD..N..GKHT  | VIRPLVY   | VAEKIEYSRLO..KF       | PIVHC  | .S.CPVVG   |
| tr A2U287 A2U287_9FLAO           | KND..A..GDLV  | VLRLP     | LVNCSDEIEESNYK..NY    | PIIIPC | .N...LCGSQ |
| tr A0A1G0MC79 A0A1G0MC79_9DELT   | LAD..N..GVIT  | VIRPLVY   | VAEDDIISFSNOV..SL     | PVVCC  | .S.CPACG   |
| tr A0A0M9CHH7 A0A0M9CHH7_9FLAO   | KND..A..GDLV  | VLRLP     | LVNCSDEIDEMFSNYR..NY  | PIIIPC | .N...LCGSQ |
| tr A0A1V5JXW0 A0A1V5JXW0_9DELT   | RSN..D..GNNL  | VIRPLAY   | CSAEEDVKKYFDFL..EVEP  | VIN    | .D.CITH..R |
| tr A0A2E1TKX3 A0A2E1TKX3_9PROT   | LSDD..D..KKNV | VIRPLTY   | CKEEDLGEYARLH..KF     | PIIIPC | .N...LCGSQ |
| tr A0A2E4SAB6 A0A2E4SAB6_9FLAO   | KID..Q..GDLV  | VIRPLAY   | CKEESISYSQWK..NY      | PIIIPC | .N...LCGSQ |
| tr A0A258F7U7 A0A258F7U7_9FLAO   | KND..A..GDLI  | ILRLP     | LVNCSDEIEEYSNAM..QF   | PIIIPC | .N...LCGSQ |
| tr A0A0A8WQ54 A0A0A8WQ54_9DELT   | LAD..N..GVTT  | VIRPLVY   | VSAEQIEFARLK..SF      | PVVCC  | .R.CPACG   |
| tr X5JQR9 X5JQR9_9NOST           | LND..G..GKHI  | VIRPLAY   | CPKEDIIQRYAHMK..KF    | PIIIPC | .N...LCGSQ |
| tr A0A1Z8QQJ8 A0A1Z8QQJ8_9BACT   | QIQ..A..EGLQ  | VIRPLF    | SVYEDWIADFVQAQ..GW    | PIIAC  | .N...LCGSQ |
| tr A0A2H1E976 A0A2H1E976_9FLAO   | KND..A..GDLI  | VLRLP     | LVNCSDEIDIASYANAM..NF | PIIIPC | .N...LCGSQ |
| tr A0A1Z4RSZ1 A0A1Z4RSZ1_9CHRO   | LSDD..D..KQNV | VIRPLVY   | CAEKDIIQYALVR..DF     | PIIIPC | .N...LCGSQ |
| tr A0A1M7NRR99 A0A1M7NRR99_9FLAO | KND..A..GDLV  | VLRLP     | LVNCSDEIDIIYAAQY..EF  | PIIIPC | .N...LCGSQ |
| tr A0A1G0HBX4 A0A1G0HBX4_9GAMM   | LSDD..N..KRHI | LIRPLAY   | CQEKDIIVAYAEQ..AF     | PIIIPC | .T...LCGSQ |
| tr A0A1G0WYX2 A0A1G0WYX2_9GAMM   | LSDD..N..KKHI | VIRPLCY   | IQEKDIIISFSKDE..AY    | PIIIPC | .N...LCGSQ |
| tr A0A2E2NQ57 A0A2E2NQ57_9DELT   | RSQ..D..GRNT  | VIRPLAY   | CSAEEDVAAAYETV..GY    | PIIIPC | .D...LCGTQ |
| tr A0A2E7CJC5 A0A2E7CJC5_9PROT   | HSDD..D..GRNV | VIRPLVY   | CDKESDIAALSEEL..SF    | PIIIPC | .D...LCGSQ |
| tr A0A1L4BT26 A0A1L4BT26_9GAMM   | ITK..D..GENT  | VIRPMVLVQ | ERDLIEFAKEQ..DF       | PIIIPC | .N...LCGSQ |
| tr A0A1X1BF32 A0A1X1BF32_9GAMM   | ITQ..D..SENT  | VIRPMVLVQ | ERDLIEFAKEE..NF       | PIIIPC | .N...LCGSQ |
| tr A0A1J0KVR2 A0A1J0KVR2_9GAMM   | VTD..D..GENV  | VIRPMVY   | VQERDLIEFAKEE..NF     | PIIIPC | .N...LCGSQ |
| tr A0A2J6JE04 A0A2J6JE04_9DELT   | LAD..N..GRQT  | VIRPLVY   | IEEKDIAAFCSEN..TY     | PVVCC  | .S.CPDEA   |
| tr A0A1F8V7G5 A0A1F8V7G5_9COXI   | LSDD..N..KKNV | VIRPLAF   | CQEKDIIITFAKEQ..AF    | PIIIPC | .N...LCGSQ |
| tr A0A1G1FBX6 A0A1G1FBX6_9BACT   | RAD..D..GRSV  | VIRPLVY   | VPKEDIVFAAEA..GF      | PVTC   | .A.CPFCG   |
| tr A0A1G0E7F6 A0A1G0E7F6_9GAMM   | LTD..D..KRHI  | VIRPLAY   | CQEKDIIKYAAEQ..NF     | PTIPC  | .G...ACSNQ |
| tr A0A2E2TQ02 A0A2E2TQ02_9BACT   | QIQ..V..GDLQ  | VIRPLF    | SVHEDWIADFVQAQ..GWS   | PIIPC  | .N...LCGSQ |
| tr A0A1G0EEH5 A0A1G0EEH5_9GAMM   | LTN..D..RRHI  | VIRPLAY   | CQEKDVEKYALEQ..NF     | PIIIPC | .G...LCSNQ |
| tr A0A1F3U044 A0A1F3U044_9PROT   | RSDD..D..GRNV | VIRPLIY   | VPKELMELAEIW..NF      | PIIIPC | .N...LCGSQ |
| tr A0A2T5R4N6 A0A2T5R4N6_9DELT   | LAD..N..GETT  | VIRPLVY   | VAEERDIIITFSAMN..EY   | PVVCC  | .R.CPVCG   |
| tr A0A2D4SSF2 A0A2D4SSF2_9DELT   | LSDD..D..ERN  | VIRPLAY   | CSAEEDIQALSQEC..AF    | PIIIPC | .N...LCGSQ |
| tr A0A2N6FFT5 A0A2N6FFT5_9DELT   | LAD..N..GRHT  | VIRPLVY   | VAEKDIIIRFAGEQ..EF    | PIIIPC | .A.CPVCG   |
| tr FOXZP6 FOXZP6_AURAN           | VAS..R...GVD  | VVRPLMY   | AAEADLILAYADAM..AF    | PILPC  | .N...LCGSQ |

|    |             |              |       |
|----|-------------|--------------|-------|
| tr | A0A1G0M5C8  | A0A1G0M5C8   | 9DELT |
| tr | A0A099Y2Q8  | A0A099Y2Q8   | 9FLAO |
| tr | A0A1F3QP09  | A0A1F3QP09   | 9BACT |
| tr | A0A2N6GF142 | A0A2N6GF142  | 9DELT |
| tr | A0A2A4JYW7  | A0A2A4JYW7   | 9FLAO |
| tr | A0A1G0H818  | A0A1G0H818   | 9GAMM |
| sp | Q3A6S7      | TTCA_PELCD   |       |
| tr | A0A1H3VRW5  | A0A1H3VRW5   | 9DELT |
| sp | Q6MLE7      | TTCA_DBEBA   |       |
| tr | A0A2N6GE4U5 | A0A2N6GE4U5  | 9DELT |
| tr | A0A1E7IG50  | A0A1E7IG50   | 9DELT |
| tr | A0A1G0G5V6  | A0A1G0G5V6   | 9GAMM |
| tr | A0A2M7ZW17  | A0A2M7ZW17   | 9GAMM |
| sp | Q2A3F9      | TTCA2_FRATH  |       |
| tr | I2AZ39      | I2AZ39_FRANT |       |
| tr | A0A097EM44  | A0A097EM44   | 9GAMM |
| tr | A0A1G0GG76  | A0A1G0GG76   | 9GAMM |
| tr | A0A0B5BJ72  | A0A0B5BJ72   | 9DELT |
| sp | Q39QCS5     | TTCA_GEOGM   |       |
| tr | A0A0C1TS20  | A0A0C1TS20   | 9DELT |
| tr | A0A1G5MEY4  | A0A1G5MEY4   | 9DELT |
| tr | A0A1GH814   | A0A1GH814    | 9BACT |
| tr | A0A1MG10EA  | A0A1MG10EA   | MALRU |
| sp | A9KE14      | TTCA_COXBN   |       |
| tr | E8WQ56      | E8WQ56_GEOS8 |       |
| tr | A0A1G0M695  | A0A1G0M695   | 9DELT |
| tr | A0A217SED0  | A0A217SED0   | 9FLAO |
| tr | K9RJ13      | K9RJ13_9CYAN |       |
| tr | A0A1V5GZ62  | A0A1V5GZ62   | 9DELT |
| tr | A0A1Q3SMU5  | A0A1Q3SMU5   | 9GAMM |
| tr | A0A192X0U1  | A0A192X0U1   | 9BACT |
| tr | A0A1E7HUG3  | A0A1E7HUG3   | 9DELT |
| tr | A0A2G1ZLV9  | A0A2G1ZLV9   | 9COCI |
| tr | A0A258VXM1  | A0A258VXM1   | 9PROT |
| tr | A0A1G9TDQ4  | A0A1G9TDQ4   | 9DELT |
| tr | A0A1L3GPX7  | A0A1L3GPX7   | 9DELT |
| tr | A0A2W4K8M9  | A0A2W4K8M9   | 9BACT |
| tr | B7G797      | B7G797_PHATC |       |
| sp | A5GBX4      | TTCA_GEOUR   |       |
| sp | B9M1Y2      | TTCA_GEOFD   |       |
| tr | A0A2N6BQY4  | A0A2N6BQY4   | 9DELT |
| tr | A0A1W9U133  | A0A1W9U133   | 9DELT |
| tr | Q1K2G5      | Q1K2G5_DESAB |       |
| tr | A0A2N6ESB2  | A0A2N6ESB2   | 9DELT |
| tr | A0A1Y6B5V3  | A0A1Y6B5V3   | 9PROT |
| tr | A0A2E3NDA3  | A0A2E3NDA3   | 9DELT |
| tr | A0A2D7NNW1  | A0A2D7NNW1   | 9BACT |
| tr | A0A0SB8FY2  | A0A0SB8FY2   | 9PROT |
| tr | A0A2E8HZL3  | A0A2E8HZL3   | 9PROT |
| tr | A0A2G2L3Z8  | A0A2G2L3Z8   | 9GAMM |
| tr | A0A2D4RZ44  | A0A2D4RZ44   | 9GAMM |
| tr | A0A0D6ETW7  | A0A0D6ETW7   | 9PROT |
| tr | A0A2GG8V8   | A0A2GG8V8    | 9GAMM |
| tr | A0A2H9SMD1  | A0A2H9SMD1   | 9GAMM |
| tr | A0A2E9JDQ9  | A0A2E9JDQ9   | 9GAMM |
| tr | A0A2E6EJ87  | A0A2E6EJ87   | 9RICK |
| tr | A0A2E7CSE6  | A0A2E7CSE6   | 9FLAO |
| tr | A0A2I2DP53  | A0A2I2DP53   | 9FLAO |
| tr | A0A1EM6CGK2 | A0A1EM6CGK2  | 9FLAO |
| tr | A0A2E4VOZ3  | A0A2E4VOZ3   | 9FLAO |
| tr | A0A2S7WMD7  | A0A2S7WMD7   | 9FLAO |
| tr | A0A1YOMUY7  | A0A1YOMUY7   | 9FLAO |
| tr | A0A1B8U105  | A0A1B8U105   | 9FLAO |
| tr | A0A2E3Y167  | A0A2E3Y167   | 9FLAO |
| tr | A0A1L4BS83  | A0A1L4BS83   | 9GAMM |
| tr | A0A246Q4W5  | A0A246Q4W5   | 9BURK |
| tr | W8X665      | W8X665_CASDE |       |
| tr | A0A2U1LC90  | A0A2U1LC90   | 9BURK |
| tr | W0PLA6      | W0PLA6_9BURK |       |
| tr | A0A0K8P592  | A0A0K8P592   | IDESA |
| tr | A0A225MGV7  | A0A225MGV7   | 9BURK |
| tr | A0A1W6Z3Y4  | A0A1W6Z3Y4   | 9BORD |
| tr | A0A2M9GTQ4  | A0A2M9GTQ4   | 9BURK |
| tr | A0A261TJ55  | A0A261TJ55   | 9BORD |
| tr | A0A1M5TG54  | A0A1M5TG54   | 9BURK |
| tr | V8FR17      | V8FR17_9BURK |       |
| tr | A0A261S3A1  | A0A261S3A1   | 9BORD |
| tr | A0A157L810  | A0A157L810   | 9BORD |
| tr | A0A261W8G2  | A0A261W8G2   | 9BORD |
| tr | F4GTM2      | F4GTM2_PUSST |       |
| tr | A0A1F4NDN1  | A0A1F4NDN1   | 9BURK |
| tr | A0A1H8E7G5  | A0A1H8E7G5   | 9BURK |
| tr | A0A2X4JT79  | A0A2X4JT79   | BORPP |
| tr | A0A146ATC2  | A0A146ATC2   | 9BORD |
| tr | A0A193GK23  | A0A193GK23   | 9BORD |
| tr | A0A1P8JSG9  | A0A1P8JSG9   | 9BURK |
| tr | A0A1F9FMJ1  | A0A1F9FMJ1   | 9DELT |
| tr | A0A0Q8M6U1  | A0A0Q8M6U1   | 9GAMM |
| tr | A0A2M9E118  | A0A2M9E118   | 9GAMM |
| tr | A0A2W4TF58  | A0A2W4TF58   | 9GAMM |
| tr | A0A023NWG5  | A0A023NWG5   | 9GAMM |
| tr | A0A0G9GZ28  | A0A0G9GZ28   | 9GAMM |
| tr | A0A0U1PC50  | A0A0U1PC50   | 9GAMM |
| tr | A0A1E4PK74  | A0A1E4PK74   | 9GAMM |
| tr | A0A1E4NQ34  | A0A1E4NQ3    |       |

|          |      |              |      |
|----------|------|--------------|------|
| LAD..N.. | GVIT | VIRPLVYLA    | EED  |
| KND..A.. | GDLI | VLRPLAFCK    | ESD  |
| TTD..D.. | GRFE | VIRPLAYCK    | EET  |
| VAD..N.. | GRHT | VIRPLVVF     | ESET |
| LSD..S.. | GEHT | VIRPLAFCK    | EET  |
| LSD..N.. | KKHI | VIRPMVYQ     | EAD  |
| LAD..N.. | GQHT | VIRPMVYVE    | ESD  |
| LAD..N.. | GKHT | VIRPLVYTE    | ETET |
| KSD..D.. | ERNI | LVRPLCYVS    | ERD  |
| AAD..N.. | GRHT | VIRPLVYVE    | EGD  |
| LAN..N.. | GKQT | VIRPLVYVE    | EED  |
| ISD..S.. | KKNI | VIRPMIYQ     | EED  |
| LSD..N.. | KKHI | VIRPMSYQ     | EED  |
| LSD..D.. | KRNI | VIRPLAFVS    | EKET |
| LSD..D.. | KRNI | VIRPLAFVS    | EKET |
| LSD..D.. | KRNI | VIRPLAFVT    | EKET |
| LSD..N.. | KKHI | VIRPMVYQ     | EAD  |
| LAD..N.. | GETT | VIRPLVYVE    | ERD  |
| LAD..N.. | GATT | VIRPLVYVE    | ERD  |
| LAD..N.. | GETT | VIRPLVYVE    | ERD  |
| VTR..K.. | GDLT | VVRPMAFVA    | EGD  |
| RAD..D.. | GRNI | VIRPLVYVP    | EED  |
| LAD..N.. | GKQT | VIRPLVYVE    | EAD  |
| LSD..N.. | KRHV | LIRPLAYCK    | ERD  |
| LAD..N.. | GVTT | VIRPLVYVP    | EKET |
| LAD..N.. | GVTT | VIRPLVYVP    | EKET |
| KND..A.. | GDLI | VLRPLALCK    | ESD  |
| KSD..D.. | GENT | VIRPLAYCS    | EET  |
| VSN..D.. | GRNR | VIRPLAYCKLIT | VE   |
| LSD..N.. | QRHI | VIRPLSYQ     | EAD  |
| TTN..D.. | ERYD | VIRMIIEG     | ESL  |
| LAD..N.. | GRHT | VIRPLVYVE    | ERL  |
| LTD..S.. | KKQV | VIRPMVYQ     | EKDI |
| ISD..E.. | GTHT | VVRPLCYVK    | EED  |
| AAD..N.. | GRHT | VIRPLVYVE    | EQD  |
| QAD..N.. | GRHT | VIRPLVYVE    | ERD  |
| VAD..D.. | KRNI | VIRPLVYVF    | EED  |
| TSQ..R.. | GSLA | VMRPLQSM     | ETD  |
| LAD..N.. | GLTT | VIRPLVYVP    | EED  |
| LAD..N.. | GLTT | VIRPLVYVS    | EED  |
| SAD..D.. | GVNT | VIRPLCRVF    | EAD  |
| QAD..N.. | GKHT | VIRPLVYVE    | EKMI |
| LAD..N.. | GEQT | VIRPLVYVE    | HLI  |
| LAD..N.. | GEQT | VIRPLVYVE    | EPLI |
| KSD..D.. | GRNI | VIRPLVYVP    | EKMI |
| ESD..D.. | GRNV | VIRPMAEVA    | EAD  |
| QIK..T.. | EDLY | VIRPLFSVQ    | EDW  |
| LTN..D.. | KHHI | VIRPLAYCQ    | ESD  |
| FSD..D.. | GRNT | IIRPLAYIP    | EQW  |
| KSD..D.. | GRNT | IIRPLAYAK    | ESD  |
| LSD..D.. | KRNI | VIRPLAYCK    | ESET |
| ISN..D.. | SKNI | IIRPLAYCS    | EKET |
| TSD..D.. | GRHV | VIRPLAYCA    | EED  |
| LSD..N.. | KKHI | VIRPLCYVQ    | EKET |
| LSD..D.. | KRNV | VIRPLAYSK    | EED  |
| RSD..D.. | GRNT | VIRPLIGCY    | EREL |
| KID..K.. | GDLV | VIRPLSFCK    | ENET |
| KND..A.. | GDLI | ILRPLAFCK    | END  |
| KND..A.. | GDLV | ILRPLAFCK    | ESD  |
| LID..K.. | GDLM | VLRPLSYCK    | ESD  |
| KND..A.. | GDLV | VLRPLAFCK    | ESD  |
| RND..A.. | GDIV | VLRPLAFCN    | ESD  |
| KND..A.. | GDLA | VLRPLAFCK    | ESD  |
| LID..K.. | RDLI | VIRPLAYCK    | EKET |
| LSD..D.. | KRNI | VIRPLAFVS    | EKET |
| VSD..D.. | GRHT | IIRPLAYIE    | ESD  |
| VSD..N.. | GEHV | IIRPLAYVR    | EKDI |
| MSD..D.. | GKNI | VIRPLAYVA    | EKDI |
| VSD..D.. | GRHT | VIRPLAYIA    | EKDI |
| VSD..D.. | GRHV | VIRPLAYVA    | ETD  |
| VSD..D.. | GKHV | VIRPLAYIP    | EQD  |
| VSD..D.. | GRHT | VIRPLAYIP    | EAEM |
| VSD..D.. | GRHT | VIRPLAYVP    | ETD  |
| VSD..D.. | GRHT | VIRPLAYVP    | ETD  |
| MSD..D.. | GQHI | VIRPLAYVP    | EKDI |
| VSD..D.. | GKHT | VIRPLAYVT    | EKDI |
| VSD..D.. | GRHT | IIRPLAYIQ    | ESD  |
| VSD..D.. | GRHT | VIRPLAYVP    | ERD  |
| VSD..D.. | GRHT | VIRPLAYVP    | ESD  |
| MSD..D.. | GKHI | VIRPLAYIP    | EKDI |
| VSD..N.. | GEFM | VIRPLAYVP    | EKDI |
| VSD..N.. | GEFM | VIRPLAYVK    | EAD  |
| VSD..D.. | GRHT | VIRPLAYVP    | ESD  |
| VSD..D.. | GRHT | VIRPLAYVA    | ETD  |
| VSD..D.. | GRHT | VIRPLAYVP    | ETD  |
| VSD..D.. | GRHI | VIRPLAYVA    | EKDI |
| TSD..D.. | GKLE | VIRPLIDVA    | EAE  |
| RSD..D.. | GRHV | VIRPLAYCR    | EDD  |
| LSD..D.. | GRHV | VIRPLAYVR    | EDD  |
| LSD..D.. | GAHV | VIRPLATVR    | EAD  |
| RSD..D.. | GRHV | VIRPLAYCK    | EAD  |
| RSD..D.. | GRHV | VIRPLAYCR    | ESD  |
| RSD..D.. | GKHV | VIRPLAYCR    | ESD  |
| RSD..D.. | GRHV | VIRPLAYCK    | ESD  |
| LSD..D.. | GRHV | VIRPLAYCR    | EDE  |
| QSD..N.. | GKNC | VIRPLSYVR    | ERD  |
| RSD..D.. | GQHI | VIRPLAYVA    | EAK  |
| RSD..D.. | GRHV | VIRPLAYCR    | END  |
| RSD..D.. | GRHI | VIRPLAYCR    | ESD  |
| HSD..D.. | GRHI | VIRPLAYVA    | EAD  |
| RSD..D.. | GRNV | VIRPLAYCS    | EAD  |
| LSD..D.. | GQHL | VIRPLAYCP    | ESL  |
| LSD..D.. | SSNI | VIRPLAYCS    | EAD  |

|   |   |   |   |   |   |   |   |   |   |   |     |   |   |   |   |   |   |   |   |   |   |
|---|---|---|---|---|---|---|---|---|---|---|-----|---|---|---|---|---|---|---|---|---|---|
| E | F | S | R | L | A | . | K | L | P | V | V   | C | . | C | . | C | P | V | C | G |   |
| E | E | Y | S | G | Y | M | . | N | F | P | I   | P | C | . | N | . | . | L | C | G |   |
| E | E | Y | S | D | Y | N | . | K | F | P | I   | P | C | . | N | . | . | L | C | G |   |
| E | A | F | A | E | G | N | . | Q | I | P | T   | V | C | . | S | . | C | A | F | A |   |
| I | A | I | A | N | D | R | . | K | F | P | I   | P | C | . | N | . | . | L | C | G |   |
| K | A | F | A | S | E | Q | . | F | P | I | P   | C | . | T | . | . | L | C | G |   |   |
| K | A | A | F | A | E | N | . | G | L | P | A   | P | C | . | G | . | C | P | E | E |   |
| Q | R | F | S | N | A | F | . | H | F | P | I   | V | N | C | . | S | . | C | P | V |   |
| E | E | L | A | A | E | V | . | A | F | P | V   | P | C | . | N | . | . | L | C | G |   |
| E | E | R | S | R | Q | H | . | Q | M | P | V   | P | C | . | A | . | C | P | V | C |   |
| E | E | S | S | R | A | V | . | N | Y | P | I   | V | C | . | V | . | C | P | V | A |   |
| K | I | T | Y | L | R | E | Q | . | F | P | I   | P | C | . | T | . | . | L | C | G |   |
| K | D | Y | A | R | E | Q | . | Q | F | P | I   | P | C | . | T | . | . | L | C | G |   |
| L | E | Y | S | Q | L | K | . | E | F | P | I   | P | C | . | N | . | . | L | C | G |   |
| L | E | Y | S | Q | L | K | . | N | F | P | I   | P | C | . | N | . | . | L | C | G |   |
| L | E | Y | S | Q | L | K | . | D | F | P | I   | P | C | . | N | . | . | L | C | G |   |
| K | S | F | A | S | E | Q | . | F | P | I | P   | C | . | N | . | . | L | C | G |   |   |
| I | P | F | A | R | G | N | . | R | F | P | V   | V | C | . | C | . | C | P | V | C |   |
| I | P | F | A | R | E | N | . | S | F | P | V   | V | C | . | C | . | C | P | V | C |   |
| I | P | F | A | R | E | N | . | R | F | P | V   | V | C | . | C | . | C | P | V | C |   |
| L | R | Y | L | R | L | A | . | G | Y | T | A   | P | R | . | D | . | . | L | C | G |   |
| L | R | Y | A | S | L | A | . | G | F | P | V   | T | C | . | A | . | C | P | S | C |   |
| E | S | S | R | L | I | . | E | Y | P | L | I   | C | . | S | . | C | P | V | A | G |   |
| I | K | Y | A | M | E | Q | . | F | P | L | I   | P | C | . | N | . | . | L | C | G |   |
| I | P | F | S | R | N | N | . | R | F | P | V   | V | C | . | C | . | C | P | V | C |   |
| V | P | F | S | R | N | N | . | R | F | P | V   | V | C | . | C | . | C | P | V | C |   |
| E | V | Y | A | Q | H | M | . | D | F | P | I   | P | C | . | N | . | . | L | C | G |   |
| Q | S | Y | A | S | C | M | . | K | F | P | I   | P | C | . | N | . | . | L | C | G |   |
| K | A | Y | S | F | K | . | D | V | E | P | V   | S | C | . | S | . | C | M | I | . |   |
| E | Y | A | K | L | K | . | Q | F | P | I | P   | C | . | N | . | . | L | C | G |   |   |
| A | E | H | A | S | A | . | G | Y | P | I | L   | P | C | . | N | . | . | L | C | G |   |
| A | E | F | S | Y | A | N | . | D | F | P | T   | I | A | C | . | A | . | C | P | A |   |
| A | Y | A | E | E | Q | . | K | F | P | I | P   | C | . | N | . | . | L | C | G |   |   |
| E | I | B | L | K | S | K | . | D | F | P | I   | P | C | . | N | . | . | L | C | G |   |
| I | S | F | T | R | A | N | . | D | F | P | I   | I | C | . | A | . | C | P | V | C |   |
| I | S | E | F | S | Y | A | N | . | Q | L | P   | T | I | A | C | . | A | . | C | P | A |
| I | T | Y | A | L | Q | . | K | F | P | I | P   | I | C | . | V | . | C | P | V | S |   |
| I | P | F | S | A | H | L | . | N | F | P | I   | L | P | C | . | N | . | . | L | C |   |
| I | P | F | S | R | N | N | . | R | F | P | V</ |   |   |   |   |   |   |   |   |   |   |



|                                |    |   |   |      |         |    |    |    |     |      |      |    |     |     |    |   |   |      |      |
|--------------------------------|----|---|---|------|---------|----|----|----|-----|------|------|----|-----|-----|----|---|---|------|------|
| tr A0A099CZD4 A0A099CZD4_9GAMM | RS | D | D | GRHV | VIRPLAY | CR | ER | DI | EA  | YAE  | EQ   | GF | PII | PC  | N  | N | L | CGSQ |      |
| tr A0A0S8FJD6 A0A0S8FJD6_9GAMM | RS | D | D | GRHI | VIRPLAY | CR | ER | DI | GR  | YAR  | AR   | DF | PVI | PC  | N  | N | L | CGSQ |      |
| tr A0A2E2VRK2 A0A2E2VRK2_9GAMM | LD | D | D | RRHI | VIRPLAY | AK | EV | DI | AE  | YAE  | EAK  | AF | PII | PC  | N  | N | L | CGSQ |      |
| tr A0A2W4RZH5 A0A2W4RZH5_9PROT | RE | D | D | GRHI | VIRPLAY | VP | ER | DI | AR  | YAA  | AR   | GF | PII | PC  | N  | N | L | CGSQ |      |
| tr A0A1V4GN33 A0A1V4GN33_9GAMM | LD | D | D | GQNV | LIRPLAY | VE | ED | DI | IK  | YAR  | YK   | DF | PII | PC  | N  | N | L | CGSQ |      |
| tr A0A211RJX7 A0A211RJX7_9GAMM | LD | D | D | GQNV | LIRPLAY | VE | ED | DI | IK  | YAN  | YK   | QF | PII | PC  | N  | N | L | CGSQ |      |
| tr A0A2K0XWS5 A0A2K0XWS5_9GAMM | LD | D | D | KQNV | LIRPLAY | VA | ED | DI | IK  | YAN  | YK   | KF | PII | PC  | N  | N | L | CGSQ |      |
| tr A0A2J9E0W4 A0A2J9E0W4_9GAMM | LD | D | D | KQNI | LIRPLAY | VE | ED | DI | IK  | YAR  | YK   | EF | PII | PC  | N  | N | L | CGSQ |      |
| tr A0YCA3 A0YCA3_9GAMM         | RS | N | D | GRNV | VIRPLAY | CK | ED | DI | IA  | LA   | AEHR | EF | PII | PC  | N  | N | L | CGSQ |      |
| tr F3LGC1 F3LGC1_9GAMM         | LD | D | D | KRNI | IIRPMAF | CR | ES | DI | AR  | YAV  | YQ   | QF | PII | PC  | N  | N | L | CGSQ |      |
| tr A0A2G6D109 A0A2G6D109_9PROT | LD | D | D | KRNI | VIRPMAY | CR | ER | DI | KR  | FAD  | LK   | NY | PII | PC  | S  | S | L | CGSQ |      |
| tr L2F7Z8 L2F7Z8_9GAMM         | LD | D | D | EQNV | LIRPLAY | VE | ED | DI | IK  | YAN  | YK   | QF | PII | PC  | N  | N | L | CGSQ |      |
| tr A0A1T0CIB6 A0A1T0CIB6_9GAMM | LD | D | D | EQNV | LIRPLAY | VE | ED | DI | IK  | YAR  | YK   | QF | PVI | PC  | G  | G | L | CGSQ |      |
| tr A0A1Q3YDX0 A0A1Q3YDX0_9BURK | VS | D | D | GRHV | VIRPLAY | VK | ED | DI | AA  | YA   | QWR  | RF | PII | PC  | N  | N | L | CGSQ |      |
| tr A0A2I2KGJ9 A0A2I2KGJ9_9PROT | VS | D | D | GRNV | VIRPMAY | CS | ED | DI | AA  | WA   | GVR  | GF | PII | PC  | D  | D | L | CGSQ |      |
| tr A0A059KNT0 A0A059KNT0_9BURK | VS | D | D | GKHT | VIRPLAY | VA | ED | DI | ER  | WA   | AHR  | QF | PII | PC  | T  | T | L | CGSQ |      |
| tr A0A2D9EMR9 A0A2D9EMR9_9BURK | KS | S | D | GKHI | VIRPLAY | LP | ED | DI | IA  | YAK  | LK   | EF | PII | PC  | S  | S | L | CGSQ |      |
| tr D5WYLO D5WYLO_THIK1         | VS | D | D | GKHV | VIRPLAY | VE | ED | DI | ER  | WA   | ELR  | AF | PLI | PC  | T  | T | L | CGSQ |      |
| tr A0A2N4UHD8 A0A2N4UHD8_9BURK | AS | D | D | GKHV | VIRPLAY | VT | ED | DI | IA  | YSA  | LK   | QF | PII | PC  | N  | N | L | CGSQ |      |
| tr A0A231HMA8 A0A231HMA8_9BURK | KD | S | N | GKHI | VIRPLAY | VP | ED | DI | IA  | YAK  | LK   | EF | PII | PC  | T  | T | L | CGSQ |      |
| tr A0A127PZQ3 A0A127PZQ3_9BURK | QD | S | D | GKQI | VIRPLAY | VK | ED | DI | IR  | YAE  | VK   | QF | PII | PC  | D  | D | L | CGSQ |      |
| tr A0A1L5XXU0 A0A1L5XXU0_9XANT | RS | D | D | GQHV | VIRPLAY | VR | ED | DI | AA  | YA   | QAR  | QF | PII | PC  | N  | N | L | CGSQ |      |
| tr E6PW05 E6PW05_9ZZZZ         | VS | D | D | GRHI | VIRPLAY | VE | ED | DI | VR  | WA   | AHR  | QF | PII | PC  | T  | T | L | CGSQ |      |
| tr A0A259PCA8 A0A259PCA8_9BURK | VS | D | D | GRHI | VIRPLAY | VE | ED | DI | QR  | WA   | DIR  | AF | PII | PC  | T  | T | L | CGSQ |      |
| tr J3D2W3 J3D2W3_9BURK         | QD | S | D | GKQI | VIRPLAY | VK | ED | DI | TR  | YAE  | VK   | EF | PII | PC  | D  | D | L | CGSQ |      |
| tr A0A1C3H6K4 A0A1C3H6K4_9GAMM | QD | S | D | GAHI | VIRPLAY | CD | ER | DI | AK  | YAE  | WR   | QF | PII | PC  | N  | N | L | CGSQ |      |
| tr A0A1Q3XG69 A0A1Q3XG69_9BURK | VS | D | D | GRHT | VIRPLAY | IK | ED | DI | IA  | YAW  | QK   | AF | PII | PC  | N  | N | L | CGSQ |      |
| tr A0A2V1K2N5 A0A2V1K2N5_9BORD | VS | D | D | GRHT | VIRPLAY | VV | ED | DI | IA  | YAD  | WK   | AF | PII | PC  | N  | N | L | CGSQ |      |
| tr A0A0G3BIT1 A0A0G3BIT1_9BURK | VS | D | D | GKHV | VIRPLAY | VN | ED | DI | ER  | WA   | AHR  | KF | PII | PC  | T  | T | L | CGSQ |      |
| tr A0A2U2N809 A0A2U2N809_9GAMM | RS | Q | D | GDNV | VIRPLAY | VP | ER | DI | TY  | ER   | YAE  | RM | QF  | PII | PC | D | D | L    | CGSQ |
| tr A0A1U9K1B5 A0A1U9K1B5_9BURK | QD | S | N | GQHI | VIRPLAY | VA | ED | DI | IA  | YAK  | LK   | EF | PII | PC  | N  | N | L | CGSQ |      |
| tr A0A272EZ66 A0A272EZ66_9RHOO | RS | D | D | GRHT | VIRPLAY | CA | ED | DI | VR  | WA   | QHR  | EY | PII | PC  | N  | N | L | CGSQ |      |
| tr C3X5M8 C3X5M8_OXAFO         | KT | D | D | GKHI | VIRPLVY | VK | ED | DI | ER  | FAD  | IQ   | QY | PLF | PC  | N  | N | L | CGAK |      |
| tr A0A2W4M0X6 A0A2W4M0X6_9PROT | RE | S | D | GRHV | VIRPLAY | VA | ED | DI | ER  | YAR  | AR   | AF | PLI | PC  | S  | S | L | CGSQ |      |
| tr A0A2G4J906 A0A2G4J906_9BURK | VS | D | N | GKHT | VIRPLAY | IQ | ED | DI | IA  | YAD  | WK   | QF | PII | PC  | T  | T | L | CGSQ |      |
| tr A0A1J4S131 A0A1J4S131_9BURK | VS | D | D | GGHV | VIRPLAY | VA | ED | DI | TA  | WA   | AQR  | QF | PII | PC  | S  | S | L | CGSQ |      |
| sp A1WHW6 TTCA_VERTI           | VS | D | D | GQHV | VIRPLAY | VA | ED | DI | TR  | WA   | AQR  | NF | PII | PC  | N  | N | L | CGSQ |      |
| tr E6UVL9 E6UVL9_VARPE         | VS | D | D | GKHI | VIRPLAY | VA | ED | DI | VR  | WA   | QHR  | EF | PII | PC  | T  | T | L | CGSQ |      |
| tr A0A2X1UQ14 A0A2X1UQ14_9BURK | LD | S | N | GKHT | VIRPLAY | VA | ES | DI | IK  | FA   | ELQ  | NF | PII | PC  | N  | N | L | CGSQ |      |
| tr A0A1J1E0T5 A0A1J1E0T5_LYSEN | LD | S | D | GRHV | VIRPLAY | VR | ED | DI | VD  | YAA  | AR   | QF | PII | PC  | N  | N | L | CGSQ |      |
| tr A0A0S4P2H4 A0A0S4P2H4_9BURK | LD | S | D | GKHM | VIRPMAY | VK | ED | DI | SE  | RYA  | EVK  | QF | PII | PC  | D  | D | L | CGSQ |      |
| tr R7I1J5 R7I1J5_9BURK         | RS | D | D | GQHV | IIRPLAY | VH | ES | DI | TR  | KWA  | QIQ  | GY | PVI | PC  | N  | N | L | CGFA |      |
| tr F1VXA8 F1VXA8_9BURK         | QD | S | D | GKHI | VIRPLAY | VK | ED | DI | TE  | RYA  | EVK  | NF | PII | PC  | D  | D | L | CGSQ |      |
| tr A0A1H9Z341 A0A1H9Z341_NITER | VS | D | D | GCHV | VIRPLAY | CK | ED | DI | LA  | YAW  | HA   | QF | PII | PC  | N  | N | L | CGSQ |      |
| tr V4XY05 V4XY05_9PROT         | IS | D | S | GQHT | IIRPLAY | VA | ED | DI | TR  | WA   | ELQ  | QY | PII | PC  | T  | T | L | CGSQ |      |
| tr A0A1F2T4S5 A0A1F2T4S5_9BACT | VS | D | D | GAHV | VIRPLVY | VG | ED | DI | EA  | RAYA | KEC  | EL | PVV | PC  | C  | C | L | CGAC |      |
| sp Q0AA41 TTCA_ALKEH           | RS | N | N | GRHV | VIRPLAY | VP | EP | DI | LY  | ER   | YAE  | RM | AF  | PII | PC | T | T | L    | CGSQ |
| tr A0A147GW72 A0A147GW72_9BURK | VS | D | D | GRHV | VIRPLAY | VA | ED | DI | KL  | VRWA | QHR  | GF | PII | PC  | N  | N | L | CGSQ |      |
| tr A0A1F4HB56 A0A1F4HB56_9BURK | VS | D | D | GKHI | VIRPMAY | VT | ED | DI | TR  | WA   | LVR  | GF | PII | PC  | T  | T | L | CGSQ |      |
| tr A0A2R4XML8 A0A2R4XML8_9BORD | VS | D | D | GRHT | VIRPLAY | VK | ES | DI | QT  | YAD  | IR   | EF | PII | PC  | N  | N | L | CGSQ |      |
| tr A0A0Q7D0U2 A0A0Q7D0U2_9BURK | VS | D | D | GRHV | VIRPLAY | VP | ED | DI | EA  | WA   | AHR  | QF | PII | PC  | T  | T | L | CGSQ |      |
| tr H5WKR2 H5WKR2_9BURK         | VS | D | D | GKNV | VIRPLAY | VA | ED | DI | ER  | WA   | AHR  | QF | PII | PC  | S  | S | L | CGSQ |      |
| tr A0A1G4A9Y2 A0A1G4A9Y2_9GAMM | LD | S | D | GRHV | VIRPLAY | VR | ED | DI | AR  | YAR  | LK   | QF | PII | PC  | N  | N | L | CGSQ |      |
| tr A0A0N1AQX3 A0A0N1AQX3_9PROT | VS | D | N | GQHT | VIRPLAY | VA | ED | DI | LE  | KWA  | VHR  | QF | PII | PC  | T  | T | L | CGSQ |      |
| tr A0A2M8VQK0 A0A2M8VQK0_9BURK | RS | D | D | GKHI | VIRPLAY | VP | EK | DI | LE  | RY   | SVD  | MF | PII | PC  | N  | N | L | CGSQ |      |
| sp B1XSG8 TTCA_POLNS           | RS | D | D | GKHI | VIRPLAY | VP | EK | DI | LE  | RY   | SAD  | MF | PII | PC  | D  | D | L | CGSQ |      |
| tr A0A0Q4Y4D9 A0A0Q4Y4D9_9BURK | VS | D | D | GRHI | VIRPLAY | VP | ER | DI | VR  | WA   | AHR  | AF | PII | PC  | T  | T | L | CGSQ |      |
| tr D8PAI7 D8PAI7_9BACT         | RS | K | S | GRHV | VIRPLAY | VK | ED | DI | AR  | YAA  | L    | QF | PII | PC  | D  | D | L | CGSQ |      |
| tr A0A2W4TTJ2 A0A2W4TTJ2_9BURK | VS | D | D | GQHV | VIRPMAY | VA | ED | DI | TR  | WA   | AEVR | EF | PII | PC  | T  | T | L | CGSQ |      |
| tr F5XXJ8 F5XXJ8_RAMTT         | VS | D | D | GRHM | VIRPLAY | VA | ED | DI | IR  | WA   | AYR  | QF | PII | PC  | T  | T | L | CGSQ |      |
| tr A0A1J5S2E4 A0A1J5S2E4_9ZZZZ | VS | D | D | GRHV | VIRPLAY | CR | EQ | DI | LA  | WA   | AEER | QF | PII | PC  | D  | D | L | CGSQ |      |
| tr A0A149VSF2 A0A149VSF2_9PROT | VS | D | D | GHHV | VIRPLAY | SR | EK | DI | AR  | YAK  | HR   | NF | PII | PC  | D  | D | L | CGSQ |      |
| tr A0A1T5KK47 A0A1T5KK47_9GAMM | LD | S | D | GRHV | VIRPLAY | VR | ES | DI | QA  | YAA  | QAR  | NF | PII | PC  | D  | D | L | CGSQ |      |
| tr A0A1J5QHI3 A0A1J5QHI3_9ZZZZ | VS | D | D | GRHV | VIRPLAY | VE | ED | DI | ER  | WA   | AEHR | AF | PII | PC  | T  | T | L | CGSQ |      |
| tr A0A239BRC0 A0A239BRC0_9BURK | QD | S | D | GKNV | VIRPLAY | VK | ED | DI | ER  | YAA  | QVR  | GF | PII | PC  | D  | D | L | CGSQ |      |
| tr A0A2N2UY70 A0A2N2UY70_9PROT | VS | D | D | GRHV | VIRPLAY | CR | ES | DI | EA  | WAR  | VR   | EY | PII | PC  | D  | D | L | CGSQ |      |
| tr A0A1D2TFZ7 A0A1D2TFZ7_9BURK | LD | S | D | GRHI | VIRPLAY | VE | ED | DI | EA  | YAR  | WR   | EF | PII | PC  | N  | N | L | CGSQ |      |
| tr A0A0E3UN32 A0A0E3UN32_9GAMM | LD | S | D | GRHV | VIRPLAY | VR | ES | DI | AE  | YAT  | AR   | GF | PII | PC  | N  | N | L | CGSQ |      |
| tr A0A1G3HJ33 A0A1G3HJ33_9RHOO | VS | D | D | GRNI | VIRPLAY | CR | ES | DI | EA  | WA   | E    | TR | AF  | PII | PC | N | N | L    | CGSQ |
| tr A0A1D2SHY1 A0A1D2SHY1_9BURK | VS | D | D | GRHI | VIRPLAY | AR | ED | DI | LAG | FA   | QWR  | EF | PII | PC  | N  | N | L | CGSQ |      |
| tr A0A0S8AXD2 A0A0S8AXD2_9PROT | VS | D | D | GRHV | VIRPLAY | VR | ED | DI | AR  | YAA  | QVR  | RF | PII | PC  | N  | N | L | CGSQ |      |
| tr A0A2S9H4F0 A0A2S9H4F0_9BURK | QD | S | D | GKHM | VIRPMAY | VK | ED | DI | TF  | RYA  | EVK  | KF | PII | PC  | D  | D | L | CGSQ |      |
| tr A0A0Q5YU64 A0A0Q5YU64_9BURK | VS | D | D | GRHV | VIRPLAY | VP | EK | DI | IR  | WA   | AEHR | QF | PII | PC  | T  | T | L | CGSQ |      |
| tr A0A127JUC5 A0A127JUC5_9BURK | VS | D | D | GRHM | VIRPLAY | VP | EK | DI | VR  | WA   | AEHR | QF | PII | PC  | T  | T | L | CGSQ |      |
| tr A0A0Q5ISN8 A0A0Q5ISN8_9DEIO | QD | S | D | CSNV | VIRPLAY | VP | ED | DI | VR  | YAA  | QAA  | RF | PII | PC  | D  | D | L | CGAQ |      |
| tr A0A149W1G2 A0A149W1G2_9PROT | VT | D | D | GHHV | VIRPLAY | CR | ED | DI | AR  | YARG | M    | EF | PII | PC  | N  | N | L | CGSQ |      |
| tr A0A1Y2R1U1 A0A1Y2R1U1_9BURK | VS | D | D | GQHV | VIRPMAY | VA | ED | DI | AR  | WA   | E    | IR | QF  | PII | PC | T | T | L    | CGSQ |
| tr A0A0S4LKC6 A0A0S4LKC6_9BACT | RS | K | D | GRHL | VIRPLVL | VK | ED | DI | AR  | YAE  | AR   | GF | PII | PC  | D  | D | L | CGAQ |      |
| tr A0A2N2TX36 A0A2N2TX36_9PROT | VS | D | D | GRHI | VIRPLAY | CR | ER | DI | EA  | WA   | ALR  | RF | PII | PC  | D  | D | L | CGSQ |      |
| tr A0A023Y8A4 A0A023Y8A4_9GAMM | RS | D | D | GQHV | VIRPLAY | VA | ED | DI | IR  | YAA  | QAR  | AF | PII | PC  | N  | N | L | CGSQ |      |
| tr A0A1E4IL97 A0A1E4IL97_9BURK | VS | D | D | GQHV | VIRPLAY | VA | ED | DI | ER  | WA   | AEHR | QF | PII | PC  | S  | S | L | CGNQ |      |
| tr A0A1C9V9X4 A0A1C9V9X4_9BURK | VS | D | D | GKHV | VIRPLAY | VP | EK | DI | TR  | WA   | DIR  | QF | PII | PC  | T  | T | L | CGSQ |      |
| tr A0A2U1RUV0 A0A2U1RUV0_9PROT | VS | D | D | GRHV | VIRPLAY | VE | ED | DI | LA  | YAG  | DR   | AF | PII | PC  | D  | D | L | CGSQ |      |
| sp A7H8W2 TTCA_ANADF           | RS | D | D | GRNV | VVRPLCY | AA | ED | DI | AA  | FAT  | AM   | RF | PVI | PC  | D  | D | L | CGSQ |      |
| tr A0A2S7DIN9 A0A2S7DIN9_9XANT | RS | D | D | GAHV | VIRPLAY | VR | ED | DI | AA  | YAA  | QLR  | QF | PII | PC  | N  | N | L | CGSQ |      |
| tr A0A0Q6WLA5 A0A0Q6WLA5_9BURK | VS | D | D | GRNV | VIRPLAY | VP | EV | DI | ER  | WA   | AHR  | QF | PII | PC  | T  | T | L | CGSQ |      |
| tr A0A240DXW0 A0A240DXW0_9BURK | RS | D | D | GKHM | VIRPLAY | VP | EK | DI | LE  | RY   | SSD  | MF | PII | PC  | N  | N | L | CGSQ |      |
| tr A0A0C3RNN2 A0A0C3RNN2_9PROT |    |   |   |      |         |    |    |    |     |      |      |    |     |     |    |   |   |      |      |

|                                |               |            |         |                |        |        |       |
|--------------------------------|---------------|------------|---------|----------------|--------|--------|-------|
| tr A0A2T0XCQ9 A0A2T0XCQ9_9PROT | ISD..D..GCNI  | VIRPLAYVP  | ETDLIA  | YSQWK..KF      | PIIIPC | ..D..  | LCGSQ |
| tr A0A1H1GE24 A0A1H1GE24_9GAMM | LS D..D..GRHV | VIRPLAYVS  | EAEIAA  | HA EAM..AF     | PIIIPC | ..D..  | LCGSQ |
| tr A0A2K3V265 A0A2K3V265_9DETO | QSD..D..GRHV  | VIRPLAYVP  | ES EIV  | AY A QAR..AF   | PIIIPC | ..D..  | LCGAQ |
| tr A0A077DFR5 A0A077DFR5_9BURK | VSD..N..GKHI  | VIRPLAYVP  | ES EIQ  | YAAIB..NF      | PIIIPC | ..N..  | LCGSQ |
| tr A0A0R0D1A2 A0A0R0D1A2_9GAMM | RSD..D..GQHV  | VIRPLAYVR  | ERDIA   | QY A QAR..RF   | PIIIPC | ..T..  | LCGSQ |
| tr A0A1H6SN85 A0A1H6SN85_9GAMM | RSD..D..GRHV  | VIRPLAYCR  | ESDIAR  | YA QAR..AF     | PIIIPC | ..N..  | LCGSQ |
| tr A0A0S8B9F1 A0A0S8B9F1_9PROT | VSD..D..GRHV  | VIRPLAYVR  | EDDLAA  | YAVAR..GF      | PIIIPC | ..S..  | LCGSQ |
| tr A0A1W2AVA5 A0A1W2AVA5_9BURK | KSD..D..GRHI  | VIRPLAYVP  | EKYLEA  | YAIQE..NF      | PIIIPC | ..N..  | LCGSQ |
| tr A0A1F4C0R4 A0A1F4C0R4_9PROT | KSD..D..GRHV  | VIRPLAYVS  | EADLAA  | WAQVK..EF      | PIIIPC | ..D..  | LCGSQ |
| tr A0A0G9I466 A0A0G9I466_9XANT | RSD..D..GRHV  | VIRPLAYVR  | EADIA   | DY A QAR..GF   | PIIIPC | ..T..  | LCGSQ |
| tr A0A142LLS3 A0A142LLS3_9PROT | VSD..N..GKHI  | VIRPLAYVE  | EGDLA   | YAAWK..QF      | PIIIPC | ..D..  | LCGSQ |
| tr A0A0S4KPD2 A0A0S4KPD2_9BACT | RSK..D..GRHL  | VIRPLAFVK  | ESDLAR  | YAE LR..RF     | PIIIPC | ..D..  | LCGSQ |
| tr A0A1F3ZUE5 A0A1F3ZUE5_9PROT | VSD..D..GRHV  | VIRPLAYCE  | EKDLAA  | YAEVK..QF      | PIIIPC | ..N..  | LCGSQ |
| tr A0A1F4DZ03 A0A1F4DZ03_9PROT | VSD..D..GHHI  | VIRPLAYCE  | EQDLAA  | YAE LK..QF     | PIIIPC | ..N..  | LCGSQ |
| tr I7JPW7 I7JPW7_9BURK         | VSD..D..GKHM  | VIRSLAFVA  | EKDIIL  | YAKQK..AF      | PIIIPC | ..N..  | LCGSQ |
| tr A0A1W9I1Z2 A0A1W9I1Z2_9BACT | RSK..D..GRHL  | VIRPLALVK  | EVDLER  | YAE LR..AF     | PIIIPC | ..D..  | LCGSQ |
| tr A0A0K6INV6 A0A0K6INV6_9PROT | RND..E..GDLV  | VIRPLAYCA  | EEDLAR  | YARGM..NF      | PIIIPC | ..S..  | LCGSQ |
| tr A0A1Q7K1L6 A0A1Q7K1L6_9BACT | VSD..D..GEHV  | VIRPLVYVG  | EDEAR   | YATKEC..EL     | PIIIGC | ..C.CP | ACG   |
| tr A0A1F4A4W7 A0A1F4A4W7_9PROT | VSD..D..GRNV  | VIRPLAYVK  | EDDLA   | EYAKVK..RF     | PIIIPC | ..D..  | LCGSQ |
| tr A0A1W1I491 A0A1W1I491_9BACT | LSK..D..KRHV  | VIRPLA VR  | EADLAR  | YAE LR..GF     | PIIIPC | ..D..  | LCGSQ |
| tr A0A0A0EQJ7 A0A0A0EQJ7_9GAMM | LS D..N..GKHV | VIRPLAYAR  | EDDIA   | YADAK..QF      | PIIIPC | ..N..  | LCGSQ |
| tr A0A227KHY1 A0A227KHY1_9BURK | LS D..A..KEHI | VIRPMIYIR  | EKDLKR  | WCKVQ..NY      | DIIPK  | ..     | LCG.A |
| tr G7UTP0 G7UTP0_PSEUP         | RSD..D..GRHV  | VIRPLATVR  | EADIA   | YAAAR..GF      | PIIIPC | ..T..  | LCGSQ |
| tr A0A2E9QVJ1 A0A2E9QVJ1_9DELT | TSD..D..GRHV  | VIRPLCNVA  | EDDIAL  | TQYK..QF       | TIFPC  | ..L..  | SCDL  |
| tr A0A2D4T7S2 A0A2D4T7S2_9GAMM | KSD..D..GRHV  | VIRPLAYCR  | ESDLA   | YARVM..EF      | PIIIPC | ..N..  | LCGTQ |
| tr D0LKN0 D0LKN0_HALO1         | HSD..D..GRNT  | VIRPLAYVP  | EALLSS  | YAQER..EF      | PVVR   | ..G.CP | SCG   |
| tr A0A1E4K8H8 A0A1E4K8H8_9GAMM | RSD..D..GRNV  | LIRPLAYCR  | EDDIA   | DY A QAR..SF   | PIMP   | ..N..  | LCGSQ |
| tr A0A1F4APU1 A0A1F4APU1_9PROT | QSD..D..GKHV  | VIRPLAYVT  | EADLET  | YAKDR..QF      | PIIIPC | ..D..  | LCGSQ |
| tr A0A2N6GWA5 A0A2N6GWA5_9BACT | RSK..D..GRHV  | VIRPLA VR  | ESDLAR  | YAE LR..AF     | PIIIPC | ..D..  | LCGSQ |
| tr A0A2N6CXG2 A0A2N6CXG2_9GAMM | HTD..D..GRHV  | VIRPLAYCA  | EKDIA   | YASRTR..EF     | PIIIPC | ..N..  | LCGSQ |
| tr A0A0H1AUB9 A0A0H1AUB9_9GAMM | RSD..D..GKHV  | VIRPLAYVA  | EADIVA  | YADAK..AF      | PIIIPC | ..N..  | LCGSQ |
| tr A0A136JY00 A0A136JY00_9BACT | RSK..D..GRHL  | VIRPLAYVK  | EVDLAR  | YAALM..EF      | PIIIPC | ..D..  | LCGSQ |
| tr A0A2P526X0 A0A2P526X0_9XANT | RSD..D..GHHV  | VIRPLAYVR  | EDDIA   | YAQAQ..AF      | PLIIPC | ..T..  | LCGSQ |
| tr A0A2N6HCJ3 A0A2N6HCJ3_9BACT | RSK..D..GRHL  | VIRPLAFVK  | EMDLAR  | YAE LR..GF     | PIIIPC | ..D..  | LCGSQ |
| tr A0A1B3W763 A0A1B3W763_9GAMM | LS D..D..GRHV | VIRPLAFAC  | EEDIA   | EYARLK..EF     | PIIIPC | ..N..  | LCGSQ |
| tr A0A1Q3HX84 A0A1Q3HX84_9DELT | KSD..D..GRNT  | VIRPLCYAP  | EKEIA   | YAEAR..QF      | PIIIPC | ..D..  | LCGTQ |
| tr A0A0S8DJ34 A0A0S8DJ34_9PROT | VSD..D..GRHM  | VIRPLA CR  | ERDLER  | YAAEK..AF      | PIIIPC | ..N..  | LCGSQ |
| tr A0A1H9F4W7 A0A1H9F4W7_9GAMM | QSD..D..GRNV  | VIRPLAYCR  | ERDIA   | YAGIK..GF      | PIIIPC | ..N..  | LCGSQ |
| tr A0A1Q7RN46 A0A1Q7RN46_9BACT | KAR..D..GRNT  | VIRPLCYVW  | EDEIVR  | FVAEV..GF      | PVIC   | ..A.CP | ACG   |
| tr A0A2W4SMK5 A0A2W4SMK5_9PROT | LSE..D..GRHV  | VIRPLAYVA  | ERDIA   | YARGR..GF      | PIIIPC | ..R..  | LCGSQ |
| tr A0A1W9GP08 A0A1W9GP08_9BACT | RSK..D..GRHL  | VIRPLALVK  | EIDLAR  | YAE LR..AF     | PIIIPC | ..D..  | LCGSQ |
| tr A0A2V8L7U0 A0A2V8L7U0_9BACT | RSD..D..GRNT  | IIRFAYCR   | ADIAE   | FAAAA..QF      | PIIIPC | ..D..  | LCGSQ |
| tr A0A2N6HCC5 A0A2N6HCC5_9BACT | RSK..D..GRHV  | VIRPLSAVR  | ESDLA   | QYAE LR..AF    | PIIIPC | ..D..  | LCGSQ |
| tr A0A2P6UWD7 A0A2P6UWD7_9BURK | RSD..D..GKNI  | LIRPLAYVK  | ESDLER  | YAVYK..QF      | PIIIPC | ..N..  | LCGSE |
| tr A0A1W9Q7F1 A0A1W9Q7F1_9DELT | LTD..D..GRFH  | VIRPLIQCE  | EAKREL  | ALSEQ..AF      | PIIPC  | ..N..  | LCGSQ |
| tr D2U914 D2U914_XANAP         | RSD..D..GQHV  | VIRPLAYVR  | EHDI    | AA Y A QAR..HF | PLIIPC | ..T..  | LCGSQ |
| tr A0A2V8QZ45 A0A2V8QZ45_9BACT | RSD..S..ALNT  | VIRPLAYCR  | ESDIAE  | F AALK..GF     | PIIIPC | ..D..  | LCGSQ |
| tr A0A0C1ZJ02 A0A0C1ZJ02_9DELT | YSD..D..GRNV  | VIRPLASCG  | EAEIA   | AAWQLR..GF     | PIVPC  | ..D..  | LCGSQ |
| tr A0A2G4JKQ0 A0A2G4JKQ0_9BACT | TSD..N..GAHV  | VIRPLVYVT  | EAEAR   | YACKER..EL     | PIIIGC | ..C.CP | ACG   |
| tr A0A1P8FIE4 A0A1P8FIE4_9PROT | KSD..D..GKHI  | VIRPLTYVE  | ESDLA   | EYSQLR..AF     | PIIIPC | ..D..  | LCGSQ |
| tr A0A2N6C1I7 A0A2N6C1I7_9GAMM | RSD..D..GRHV  | VIRPLAYCS  | ERDIA   | YASAR..RF      | PIIIPC | ..N..  | LCGSQ |
| tr A0A2E6NRV0 A0A2E6NRV0_9BACT | RTV..D..GRFE  | VIRPLIECA  | ETDIT   | AHSEVR..NY     | PIIIPC | ..N..  | LCGSQ |
| tr A0A0S4M5G9 A0A0S4M5G9_9BACT | VSD..D..GSHV  | VIRPLAYVA  | EEDTIR  | WSEHR..KF      | PIIIPC | ..N..  | LCGSQ |
| tr A0A2V8RRY8 A0A2V8RRY8_9BACT | RSD..D..GRNT  | VIRPLAYCR  | EPDIAE  | YAA LK..QF     | PLIIPC | ..D..  | LCGSQ |
| tr A0A2V8NMT6 A0A2V8NMT6_9BACT | RSD..D..GRNT  | VIRPLAYCR  | ESDIAE  | YAAEK..NF      | PIIIPC | ..D..  | LCGSQ |
| tr A0A1Z3HKZ4 A0A1Z3HKZ4_9CYAN | LTD..D..HRHI  | VIRPLTYCP  | EADIA   | YARQR..QF      | PIIIPC | ..T..  | LCGSQ |
| tr A0A1E3YP57 A0A1E3YP57_9BACT | VSD..N..GQHI  | VIRPLVYVL  | EAEARA  | YAES..HL       | PVIGC  | ..C.CS | ACG   |
| tr A0A1F2VT74 A0A1F2VT74_9BACT | IS D..N..GAHV | VIRPLVYVT  | EAEAGA  | YCKES..AL      | PIIIGC | ..C.CP | ACG   |
| tr A0A229FWN0 A0A229FWN0_9BURK | KSD..D..GKHI  | VIRPLAYVP  | ESYLER  | YAAQM..DF      | PIIIPC | ..N..  | LCGSQ |
| tr A0A1Q7NMH3 A0A1Q7NMH3_9BACT | RSD..D..GRNT  | VIRPLAYCC  | ESDLAE  | FAAQA..GF      | PIIIPC | ..D..  | LCGSQ |
| tr A0A1F2UEC9 A0A1F2UEC9_9BACT | VSD..N..GAHV  | VIRPLVYAG  | EDEARA  | YAKES..DL      | PIIIGC | ..C.CP | ACG   |
| tr A0A2W4IY52 A0A2W4IY52_9PROT | RSD..D..GRNV  | VIRPLAYCA  | EEDIAE  | FARRM..KF      | PIIVPC | ..T..  | LCGSQ |
| tr A0A1Q4F9M9 A0A1Q4F9M9_9GAMM | QAD..D..GRNT  | VIRPLAYCA  | ESDLA   | EALARQR..AY    | PIIIPC | ..D..  | LCGSQ |
| tr A0A177QU13 A0A177QU13_9PROT | VSD..D..GRHV  | VIRPLAYVA  | EEDLI   | HYSRIK..SF     | PIIIPC | ..T..  | LCGSQ |
| tr A0A2E6DH17 A0A2E6DH17_9DELT | LAD..N..GQLE  | VIRPLAFVA  | EEHIA   | ALASHL..NFA    | ILIPC  | ..N..  | LCGSL |
| tr A0A1F4AZ02 A0A1F4AZ02_9PROT | VSD..D..GRHV  | VIRPLAYAR  | EDDLA   | YAEVR..RF      | PIISG  | ..S..  | LCGSQ |
| tr A0A1G0K8S4 A0A1G0K8S4_9GAMM | LS D..D..GDNI | VIRPLSCA   | EADIK   | EYARVR..EF     | PIIIPC | ..N..  | LCGSQ |
| tr A0A1F2S0S1 A0A1F2S0S1_9BACT | VSD..D..TEHV  | VIRPLVYVG  | EEDARL  | YAVEC..GL      | PIIIGC | ..C.CP | SCG   |
| tr A0A1F4F7H5 A0A1F4F7H5_9PROT | VSD..D..GRHT  | VIRPLAYVA  | EDDLA   | YAAAK..RF      | PVIPC  | ..N..  | LCGSQ |
| tr A0A1F4EY53 A0A1F4EY53_9PROT | VSD..D..GRHV  | VIRPLAYAT  | ENDLAA  | YAE LK..GF     | PIIIPC | ..N..  | LCGSQ |
| tr A0A2V9MNZ3 A0A2V9MNZ3_9BACT | RSD..D..GRNT  | VIRPLAYCR  | EADITR  | FAGLM..DY      | PIIIPC | ..D..  | LCGSQ |
| tr A0A1F2T0Z1 A0A1F2T0Z1_9BACT | VSD..D..GKHV  | VIRPLVYVG  | EEDARQ  | YTKAC..GL      | PIVGC  | ..C.CP | ACG   |
| tr A0A2E1W0Q9 A0A2E1W0Q9_9BACT | VSD..D..GRHV  | VXRLVYIS   | EEEAR   | DTQET..GL      | PVIGC  | ..C.CP | VCG   |
| tr A0A2E8PU16 A0A2E8PU16_9SPIO | RIE..E..GDLH  | VIRPLAQVS  | EDDIRS  | YVELO..GW      | TVIPC  | ..N..  | LCGSQ |
| tr A0A2E3YPS5 A0A2E3YPS5_9GAMM | LS D..D..GEHV | VIRPLAYCR  | ESHI    | SEYAQNR..QF    | PIIIPC | ..N..  | LCGSQ |
| tr A0A2V9IN59 A0A2V9IN59_9BACT | RSD..D..GRNT  | VIRPLAYCW  | ESDIAA  | FADLQ..RY      | PIIIPC | ..D..  | LCGSQ |
| tr A0A2N6EE65 A0A2N6EE65_9DELT | LAD..N..GRHT  | VIRPLVYVE  | EGEIRK  | LANRN..SF      | PTIDC  | ..G.CP | ACG   |
| tr A0A2S9YG53 A0A2S9YG53_9DELT | TTD..D..GRFE  | VIRPLIECA  | ESDIVE  | HA AWA..NY     | PIIPC  | ..N..  | LCGSQ |
| tr A0A1V5WZE2 A0A1V5WZE2_9DELT | IAD..D..GRHV  | VIRPLIYCS  | EPSIVK  | LS SSSY..GF    | PIIPC  | ..R..  | VCGSR |
| tr A0A2W4LZQ0 A0A2W4LZQ0_9PROT | VSD..D..GRNV  | VVRPLIYAS  | EADLAA  | FAEQK..RF      | PVIPC  | ..D..  | LCGSQ |
| tr A0A2V8HI30 A0A2V8HI30_9BACT | VSD..N..GRHV  | VVRPLVYVS  | ERDARA  | YATREC..GL     | PIIIGC | ..C.CP | ACG   |
| tr A0A1Z9BBR1 A0A1Z9BBR1_9PROT | FSD..N..KKHI  | VIRSLSYFR  | EXDLF   | VLASHK..KF     | I IIPC | ..N..  | XSGSQ |
| tr A0A2V8BI28 A0A2V8BI28_9BACT | VSD..D..GEHV  | VIRPLVYAG  | EDEARA  | YTKES..GL      | PIIIGC | ..C.CP | ACG   |
| tr A0A2V8FAJ3 A0A2V8FAJ3_9BACT | VSD..N..GRHV  | VVRPLVYVG  | EEDARA  | YTKER..AL      | PIIIGC | ..C.CP | ACG   |
| tr A0A1F9LA55 A0A1F9LA55_9DELT | RSD..S..GNHE  | IIRPLCYVA  | EDLIAL  | AKHM..EF       | PVIPC  | ..K..  | LCGSQ |
| tr A0A1I1VUS3 A0A1I1VUS3_9DELT | RSD..D..GRNT  | IIRPLILCE  | ERDLA   | YAVEQ..GF      | PVIPC  | ..D..  | LCGSQ |
| tr A0A2E4FKB0 A0A2E4FKB0_9BACT | VSD..D..GRHV  | VIRPLVYVS  | EEEA    | EYTKQA..EL     | PVIGC  | ..C.CP | VCG   |
| tr I4B8F4 I4B8F4_TURPD         | VSD..D..ARNT  | VIRPLMRVA  | EELTGL  | LARAL..NF      | PIIPC  | ..N..  | LCNNQ |
| tr A0A1F2TDP4 A0A1F2TDP4_9BACT | VSD..N..GEHV  | VVRPLVYVS  | EEEA    | RAYAKAE..AL    | PIIIGC | ..C.CP | ACG   |
| tr A0A2V8IUM8 A0A2V8IUM8_9BACT | VSD..N..GEHV  | VIRPLVNVLS | EEEA    | RAYAKAS..AL    | PVIGC  | ..C.CP | ACG   |
| tr A0A2E6ZRN2 A0A2E6ZRN2_9BACT | VSD..D..RRHV  | VIRPLVYVA  | EEEA    | RQYTDVE..GL    | PIIIGC | ..C.CS | ACG   |
| tr A0A2S9XKB3 A0A2S9XKB3_9DELT | RSD..D..GRNV  | IIRPLASCA  | EAEIA   | YAEQEQ..AF     | PVIPC  | ..D..  | LCGSQ |
| tr A0A2E7BN06 A0A2E7BN06_9BACT | VSD..D..RRHV  | VIRPLVYVS  | EEEA    | EAREYTERA..GL  | PVIGC  | ..C.CP | VCG   |
| tr A0A2E8E785 A0A2E8E785_9BACT | VSD..D..RRHV  | VIRPLVYVS  | EEEA    | RDYTRMA..GL    | PVIGC  | ..C.CP | ACG   |
| tr K9WKS1 K9WKS1_9CYAN         | LS D..D..GKHV | VIRPLAYCS  | EQDIG   | YAAAK..QF      | PIIIPC | ..K..  | LCGSQ |
| tr A0A2E6NIN2 A0A2E6NIN2_9BACT | VPD..V..AQOI  | VIRPLVYVS  | ES ETRA | YAEAC..GL      | PIVGC  | ..C.CP | VCG   |
| sp A1AUS1 TTCA_PELPD           | LAD..N..GRTT  | VIRPLVYAS  | EEEIVD  | FMGQV..GL      | PVVS   | ..N.CP | VSD   |
| tr A0A1W9NGM0 A0A1W9NGM0_9SPIO | QPE..K..ENLE  | IIRPLCNVE  | EAWIEE  | YALR..GW       | PLIPC  | ..S..  | YCGSQ |
| tr A0A1G0HG69 A0A1G0HG69_9GAMM | LS D..N..KKHI | VIRPLVYQ   | EADIK   | YASEQ..QF      | PIIIPC | ..T..  | LCGLQ |
| tr A0A257KZN9 A0A257KZN9_9BURK | VSD..D..GKHT  | VIRPLAYVA  | ESDLER  | YAAHR..QF      | PIIIPC | ..T..  | LCGSQ |
| tr A0A017SU25 A0A017SU25_9DELT | IAD..D..GRNV  | VIRPLIYCA  | EDDLA   | A FSTEM..AF    | PIIIPC | ..D..  | LCGSQ |
| tr A0A2E5NNL5 A0A2E5NNL5_9PROT | LS D..S..GKHI | VIRPLAYCQ  | ETLIE   | AY A QSR..QF   | PIIIPC | ..N..  | LCGSQ |
| tr H2CFU5 H2CFU5_9LEPT         | TIR..D..NDLR  | VIRPLTSVH  | EWEL    | IREYV SLS..GW  | KLIPC  | ..N..  | LCGSQ |



|                                |                                                                 |
|--------------------------------|-----------------------------------------------------------------|
| tr A0A2V6RG95 A0A2V6RG95_9BACT | QSR..K..GTLR LIRPLVYAT EELTAA YATAQ..GFRTV G ...V CGER..        |
| tr A0A2E9Q744 A0A2E9Q744_9SP10 | RIE..E..GDLH VIRPLASVS EDDIKE FVSQM..GWTVL P C ..N..L CGSQ..    |
| tr A0A1F2R952 A0A1F2R952_9BACT | VSD..D..GEHV VVRPLVYIG EAEARL YAKEC..ALPIIT G C ..C CP ACG..    |
| tr V5WDR6 V5WDR6_9SP10         | RSD..D..GRHV LIRPLSYVK EADIAA FAREM..KFPIIT S C ..G..F CVKY..   |
| tr A0A2V8GAJ7 A0A2V8GAJ7_9BACT | VSD..N..EEHV VIRPLVYVG EAEARA YCKES..ELPIIT G C ..C CP ACG..    |
| tr A0A2J6J4V4 A0A2J6J4V4_9DELT | EAD..N..GQHT VIRPMIVVE EELIRJ YSQLA..NHPIIR C ..S CP VEG..      |
| tr A0A2N2FXA6 A0A2N2FXA6_9DELT | LAD..N..GQQT VIRPFVYVE EEKLI ALGREN..SFPIIV S C ..A CP VAS..    |
| tr A0A2N6FC22 A0A2N6FC22_9DELT | LAD..N..GRHT VIRPLVYVE ESDI REWV RLM..DFPIIV H C ..S CP AFG..   |
| tr A0A2V8UJY0 A0A2V8UJY0_9BACT | HSR..D..REFR LIRPLVYVT EDITTA FAQYL..GAPLVP C ..D CS LR..       |
| tr A0A1T4JZQ3 A0A1T4JZQ3_9DELT | VCD..T..GDIT VIRPLVYVA EDDI TTV QQA..GIKT V S C ..N CP VAD..    |
| tr M4VBX7 M4VBX7_9PROT         | RSD..D..NRNT VVRPMIFVA EKDLS QLATEW..GFPIIT P C ..N..L CGSQ..   |
| tr A0A1L3GE40 A0A1L3GE40_PELAE | LAD..N..GRHT VIRPLVYVE ESDVAA FARNN..DLPSP I P C ..G CP EEV..   |
| tr A0A2V7HPH4 A0A2V7HPH4_9BACT | RSR..K..GALR LIRPLVYVS EALTA AYVDAH..GFPAVK C ..V CGDQ..        |
| tr A0A2N9LW04 A0A2N9LW04_9BACT | YSR..D..REYR LIRPLVYVT EDITRA YAEAT..GVPVVP C ..G CS QR..       |
| tr A0A2F0ART3 A0A2F0ART3_9DELT | VEA..N..GGAT LIRPLALSA EDDLRA YAMEK..EFPPIIT P C ..N..L CGSQ..  |
| tr A0A1F9PW08 A0A1F9PW08_9DELT | RAD..N..GRHT VIRPFVYVE EQDI AYCRSN..AFPVT CC A CP VCG..         |
| tr A0A212PKL4 A0A212PKL4_9DELT | MAD..N..GVTT VIRPLVYVE ERDI INFSRAN..RFPVV CC C CP VCG..        |
| tr A0A1E7IDL2 A0A1E7IDL2_9DELT | KAD..N..GIHT VIRPLVYVE ESMIEQ WAQIK..HVPQID C ..S CP LA..       |
| tr A0A1F4K9T7 A0A1F4K9T7_9BURK | VSD..D..GGHI VIRPLANVA EKDLIR WAEHR..QFPIIT P C ..N..L CGSQ..   |
| tr A0A1V6G367 A0A1V6G367_9BACT | LTK..D..GALH VVRPLIEVA ERDLRR LAELA..RFPIILP R P..A CAGR..      |
| tr A0A1V6GTQ7 A0A1V6GTQ7_9DELT | VTD..D..RRNR LIRPLAYCT SDLIG AYFPYL..EVEPV TL ..R..L CPRR..     |
| tr A0A2V7EYK5 A0A2V7EYK5_9BACT | VSR..R..GTLR LVRLVYVT EDLTA AYARAR..GLATV CG ..A CS DR..        |
| tr A0A2K2H7P2 A0A2K2H7P2_9DELT | RAD..N..GRHT VIRPLVYVE EGEIR FMRQQ..KLPVIC C ..A CP VCG..       |
| tr A0A1F7NH02 A0A1F7NH02_9BACT | TSR..R..GSIR LIRPLVYVT EELTA AYARAQ..GFLT V CG ..A CS DR..      |
| tr A0A0B5FS20 A0A0B5FS20_9DELT | LAD..N..GRHT VIRPMVYVE ESDSS FSQRY..ELPVVD C ..S CP MAG..       |
| tr A0A2V6ULT5 A0A2V6ULT5_9BACT | VSR..K..GTLR LIRPLVYVT EDLTA AYTRAR..GLTTV VG ..A CS DK..       |
| tr A0A2V6Y9C3 A0A2V6Y9C3_9BACT | VSR..K..GMLR LVRLVYVA EDLTA AYARAR..GLATV CG ..A CS DK..        |
| tr A0A2N6EF94 A0A2N6EF94_9DELT | LAD..N..GRHT VIRPMVYVE EVI AELARRS..GYPVV GC ..A CP ACG..       |
| tr A0A0A8RJ9R A0A0A8RJ9R_PSEAI | LAD..D..GRNV VIRPLAYCS EKDIE AYSQLK..EFPPIIT P C ..N..L CGSQ..  |
| tr A0A0P9TR35 A0A0P9TR35_PSEAV | RAD..D..GRNV VIRPLAYCH EKDQ AYSCLK..QFPIIT P C ..N..L CGSQ..    |
| tr A0A2D7N717 A0A2D7N717_9GAMM | VSD..D..GRYV VIRPLAYCK ESDLAQ FAVDR..AYPIIT P C ..H..L CGSQ..   |
| tr A0A2E4KXY4 A0A2E4KXY4_9GAMM | VSD..N..SRYV VIRPLAYCK EADLAQ FAVDR..NYPPIIT P C ..N..L CGSQ..  |
| tr A0A2U2AFP2 A0A2U2AFP2_9GAMM | RSD..D..GENI LIRPLAYCE EKDLI KAYQMR..QFPIIT P C ..N..L CGSQ..   |
| tr A0A1Z9WN08 A0A1Z9WN08_9GAMM | VSR..D..GRYV VIRPLAYCK ESDLAQ FAEDQ..SYPIIT P C ..N..L CGSK..   |
| tr A0A0K2G7B2 A0A0K2G7B2_NITMO | RSK..D..GRHV VIRPLAFVK ESDLAR YAE LR..AFPPIIT P C ..D..L CGSQ.. |
| tr A0A2M6X3K2 A0A2M6X3K2_9PROT | KSD..D..GVNT VIRPLVYVG EDDIE YARAR..KFPIV CC Q CP LACGE..       |
| tr A0A1V5R0W3 A0A1V5R0W3_9BACT | TSR..D..GANT VIRPLGYCE EEDLRR FAWLK..GYFFV P C ..G CPL CGA..    |
| tr X0QN96 X0QN96_9GAMM         | LSD..D..KQNM LIRPLAYVE EKDIE YAKLK..EFPPIIT P C ..N..L CGSQ..   |
| tr A0A2N2JDQ6 A0A2N2JDQ6_9DELT | RSD..D..GRNT VIRPLAYCV EEDIE AYAE LM..RFPIIT P C ..D..L CGSQ..  |
| tr A0A1Z5JK72 A0A1Z5JK72_FISSO | TSQ..R..GSLG VLRLIQCW EDDIAT YASSM..EFPPIIT P C ..N..L CSNQ..   |
| tr A6G7U2 A6G7U2_9DELT         | RSD..D..GRNV IIRPLGTCA EADIA RYAALA..NFPIV P C ..D..L CGSQ..    |
| tr A0A1L6LYW7 A0A1L6LYW7_9DELT | VSD..E..GDNI VIRPLIYCA EADLA FAAEE..AFPPIIT P C ..D..L CGSQ..   |
| tr A0A2N2GUK6 A0A2N2GUK6_9DELT | VSD..D..RRNR LIRPMITCR EAAIR RRYSQLI..EAPVT RC ..L..L CLAGC..   |
| tr A0A1M3N0E1 A0A1M3N0E1_9DELT | VSD..E..GHV VIRPLAYCA EEDIA YAKAQ..AFPPIIT P C ..D..L CGSQ..    |
| tr A0A143PPA8 A0A143PPA8_9BACT | VSD..D..GRHV VIRPLVYVS EQALE YAMAC..ELPIV GC ..C CP ACG..       |
| tr A0A0D6QP07 A0A0D6QP07_9DELT | RSR..D..GRNV VIRPLCYAA EEDVAA FAEAM..RFPIV P C ..D..L CGSQ..    |
| tr A0A150QKP6 A0A150QKP6_SORCE | VSD..A..GDNV VIRPLIYCA EDELAA FAAEE..RFPPIIT P C ..D..L CGSQ..  |
| tr A0A0F6W196 A0A0F6W196_9DELT | VSD..D..QRNT VIRPLLYCA EPSL ARFAELE..RFPPIIT P C ..D..L CGSQ..  |
| tr A0A2E4F8S9 A0A2E4F8S9_9DELT | HSD..D..GRNV VIRPLVYCA EEDIE AAFAEEM..QFPIIT P C ..N..L CGSQ..  |
| tr A0A2M8BFD6 A0A2M8BFD6_9DELT | RSD..D..RRNV VIRPMITVP ESLIE FSEAM..SFPTV P C ..T..L FCSTQ..    |
| tr A0A2D9HEL4 A0A2D9HEL4_9DELT | RSD..D..GRNV VIRPLMQCA EABIE ATYAQGM..GFPPIIT P C ..N..L CGSQ.. |
| tr A0A2E7BRH0 A0A2E7BRH0_9DELT | HSD..D..GRNT VIRPLMQCA EDEIAD YAQRM..GFPPIIT P C ..N..L CGSQ..  |
| tr A0A2E7MCK4 A0A2E7MCK4_9DELT | QAQ..D..GRNI VIRPLMRCF ESALV SYAAEQ..NFPPIIT P C ..N..L CGSQ..  |
| tr A0A2T5ZGX2 A0A2T5ZGX2_PSESD | RAD..D..GRNV VIRPLAYCA EKDQ AYSCLK..QFPIIT P C ..N..L CGSQ..    |
| tr A0A2P9H6T1 A0A2P9H6T1_9BURK | VSD..D..GRNV VIRPLAYIP EADLAR YAQVK..RFPPIIT P C ..N..L CGSQ..  |
| tr A0A2N9LJS7 A0A2N9LJS7_9BURK | VSD..D..GRHV VIRPLAYIP EADLER YAQTK..RFPPIIT P C ..N..L CGSQ..  |
| tr E7S057 E7S057_9BURK         | VSD..D..GRHV VIRPLAYVE EKDLIR WAEVK..NFPPIIT P C ..N..L CGSQ..  |
| tr A0A2A4P8Z1 A0A2A4P8Z1_9RHIZ | KNE..D..GDLR VLRLIYCS EDDLK FQAQM..KFPPIIT P C ..D..L CGSQ..    |
| tr A0A0M7AI61 A0A0M7AI61_9RHOB | IND..E..GDLL VLRLYTAICA ESDIAR FASGM..QFPIIT P C ..N..L CGSQ..  |
| tr B9QZY1 B9QZY1_LABAD         | IND..E..GDLL VLRLYAAER DIQK FSDGM..EFPPIIT P C ..N..L CGSQ..    |
| tr A0A2E8PN43 A0A2E8PN43_9RHOB | VNE..D..GDLT LLRPLAYVS EADCAK YSRLM..GYPIIT P C ..D..L CGSQ..   |
| tr A0A0U3Q6R9 A0A0U3Q6R9_9RHOB | VND..E..GDLM VLRLAYCA ESDVAK FAAGM..QFPIIT P C ..N..L CGSQ..    |
| tr Q0FM23 Q0FM23_PELBH         | VNE..E..GDLF VYRPLAHVA EVDCEK FARAM..NYPPIIT P C ..D..L CGSQ..  |
| tr A0A285NGN7 A0A285NGN7_9RHIZ | KNE..E..GDLM VYRPLAYCA ESDLEK FAEAM..QFPIIT P C ..D..L CGSQ..   |
| tr A0A1H1I26 A0A1H1I26_9RHOB   | VND..D..GDLM VLRLPMNCS EADIEK FSAAM..EFPPIIT P C ..N..L CGSQ..  |
| tr A0A1U7JKQ3 A0A1U7JKQ3_9RHOB | VND..D..GDLM VLRLIYSS EADIEK FAKAM..AFPPIIT P C ..N..L CGSQ..   |
| tr A0A2T5VDC0 A0A2T5VDC0_9RHIZ | LNE..D..GDLT LLRPLAAC EADLAR FSNAL..EFPPIIT P C ..D..L CGSQ..   |
| tr A0A1X0T5T9 A0A1X0T5T9_9RHIZ | LND..E..GDLF VLRLIYQSA ESDLER FAAAM..RFPPIIT P C ..D..L CGSQ..  |
| tr A0A1J0WLM9 A0A1J0WLM9_9RHOB | VNE..E..GDLF VYRPLAHVA EADCEK FSAAM..NYPPIIT P C ..D..L CGSQ..  |
| tr A0A068D9I9 A0A068D9I9_9RHIZ | LND..E..GDVM VLRLPSYCA EDILEK FAAAM..RFPPIIT P C ..D..L CGSQ..  |
| tr A0A1M7GB07 A0A1M7GB07_9RHOB | VND..E..GDLL VLRLAYSACA ESDIAR FAQGM..QFPIIT P C ..N..L CGSQ..  |
| tr F2J474 F2J474_POLGS         | LND..D..GDLF VLRLPSYCS ENDIAR FARAM..AFPPIIT P C ..N..L CGSQ..  |
| tr A0A2N5XWE2 A0A2N5XWE2_9RHIZ | KNE..E..GDLM LFRLPAYCE SDLEK FATLM..QFPIIT P C ..D..L CGSQ..    |
| tr A0A165N2M5 A0A165N2M5_9RHOB | VND..E..GDLM VLRLPMNSS EADIEK FSKAM..DFPIIT P C ..N..L CGSQ..   |
| tr F0L6P6 F0L6P6_AGRSH         | MND..E..GDLM VLRLAYCA EEDMAK FAAAM..EFPPIIT P C ..D..L CGSQ..   |
| tr A0A2E3JZ33 A0A2E3JZ33_9RHOB | LND..E..GDVM VLRLITAA EDDLEK FSNAM..NFPPIIT P C ..N..L CGSQ..   |
| tr A0A1Z8X2N2 A0A1Z8X2N2_9RHIZ | LNE..D..GDLT VLRLANCS EADLSK FSDFM..DFPIIT P C ..D..L CGSQ..    |
| tr A0A1L3L3G5 A0A1L3L3G5_9RHIZ | LND..E..GDLT VLRLAYAA EDLSK FAAAM..EFPPIIT P C ..D..L CGSQ..    |
| tr A0A0M6YMA0 A0A0M6YMA0_9RHOB | LND..E..GDLT VLRLAYSA EGDIAK FAAGL..QVPIIT P C ..N..L CGSQ..    |
| tr A0A2S3UK45 A0A2S3UK45_9RHOB | IND..E..GDLT VLRLAYSACA EDIAK FATGM..RFPPIIT P C ..N..L CGSQ..  |
| tr A0A062UNB4 A0A062UNB4_9RHOB | LND..E..GDCF VLRLITAA EDDLAK FAEAM..NFPPIIT P C ..N..L CGSQ..   |
| tr A0A1H2GV68 A0A1H2GV68_9RHOB | LND..D..GDLT VLRLIASS EDDIAR YAKAM..AFPPIIT P C ..D..L CGSQ..   |
| tr U4V1M4 U4V1M4_9RHOB         | VNE..E..GDLF VYRPLAFVA EKDCS FARAM..QYPIIT P C ..D..L CGSQ..    |
| tr A0A2E2JQJ5 A0A2E2JQJ5_9RHOB | VNE..E..GDLF VYRPLAHVA EEDCEK FARAM..NYPPIIT P C ..D..L CGSQ..  |
| tr A0A0Q2U9I2 A0A0Q2U9I2_9RHOB | LND..E..GDLF VYRPLAHVA EADCK FARAM..NYPPIIT P C ..D..L CGSQ..   |
| tr A0A1I3NRT7 A0A1I3NRT7_9RHOB | VNE..D..GDLT VLRLAFVA EQDCER YARAM..DYPPIIT P C ..D..L CGSQ..   |
| tr E2CME8 E2CME8_9RHOB         | VND..E..GDLT VLRLAYSA ESDIAR FASGM..EFPPIIT P C ..N..L CGSQ..   |
| tr A0A1H8KDM8 A0A1H8KDM8_9RHOB | VNE..E..GDLF LYRPLAFVA EADCEK FAKAM..NYPPIIT P C ..D..L CGSQ..  |
| tr A0A2E6Y209 A0A2E6Y209_9RHOB | VND..E..GDLM VLRLIACA EDDIAR FAKAL..EFPPIIT P C ..D..L CGSQ..   |
| tr A0A285R4U2 A0A285R4U2_9RHOB | VND..D..GDLM VLRLIACA EDDIAR FARAM..EFPPIIT P C ..D..L CGSQ..   |
| tr A0A2E2X6Z9 A0A2E2X6Z9_9RHIZ | VND..E..GDVM VLRLAYCA EEDLQK FSADM..EFPPIIT P C ..N..L CGSQ..   |
| tr A0A2A4NQL7 A0A2A4NQL7_9RHIZ | LND..A..GETL VLRLIFAA ESDLAK FASDL..KFPPIIT P C ..D..L CGSQ..   |
| tr A0A1M4N2C9 A0A1M4N2C9_9RHOB | VNE..E..GDLF VYRPLAFVA EEDCEK FARAM..NYPPIIT P C ..D..L CGSQ..  |
| tr A0A1Y5S675 A0A1Y5S675_9RHOB | VNE..E..GDLF LYRPLAHAA EADCEK FAKSM..NYPPIIT P C ..D..L CGSQ..  |
| tr A0A1M5MIW3 A0A1M5MIW3_9RHOB | VNE..E..KDLF VYRPLAHVA EEDCEK FAKAM..NYPPIIT P C ..D..L CGSQ..  |
| tr A0A1G9EC22 A0A1G9EC22_9RHOB | LNE..E..GDLF VLRLAFVA EADCEK FARAM..GYPIIT P C ..N..L CGSQ..    |
| tr A0A2T5BNF4 A0A2T5BNF4_9RHOB | VNE..D..GDLF VYRPLAFVA ETDCER FSRAM..NYPPIIT P C ..D..L CGSQ..  |
| tr A0A1H8VKC4 A0A1H8VKC4_9RHOB | VNE..E..GDLF VYRPLAHVA EADCEK FARSM..DYPPIIT P C ..D..L CGSQ..  |
| tr A0A2R8AP84 A0A2R8AP84_9RHOB | VNE..E..GDLF VYRPLAFVA EVDCEK FAKSM..NYPPIIT P C ..D..L CGSQ..  |
| tr A0A1H9X6V8 A0A1H9X6V8_9RHOB | LNE..E..GDLF VYRPLAHVA EADCEK FARAM..NYPPIIT P C ..D..L CGSQ..  |
| tr A0A1V0PXW0 A0A1V0PXW0_9RHOB | VNE..E..GDLF VYRPLAHVA EADCAR FARAM..NYPVT P C ..D..L CGSQ..    |
| tr A3JN68 A3JN68_9RHOB         | VNE..E..GDLF LYRPLAHVA EVDCEK FAQAL..NYPPIIT P C ..D..L CGSQ..  |
| tr A0A1I1TL21 A0A1I1TL21_9RHOB | LNE..E..GDLF VYRPLAHVA EVDCEK FSRSM..QYPIIT P C ..D..L CGSQ..   |





|                                |                                                              |
|--------------------------------|--------------------------------------------------------------|
| tr A0A1H0JJ15 A0A1H0JJ15_9RHIZ | VND..E..GDLL VLRPLIQCA EAD AR FSAAM..RF PII PC .D... L CGSQ  |
| tr A0A1N6PQL7 A0A1N6PQL7_9RHIZ | LND..E..GDLT LLRPLAYAA EDDLAK FAGAM..QF PII PC .D... L CGSQ  |
| tr A0A074JAH3 A0A074JAH3_9RHOB | VNE..E..GDLF VYRPLAFVA ESDCEK FATQM..NY PII PC .D... L CGSQ  |
| tr A0A231UWT7 A0A231UWT7_9RHIZ | LND..E..GDVE VLRPLALCA EADM AKLA EAL..AF PII PC .D... L CGSQ |
| tr I5BTQ6 I5BTQ6_9RHIZ         | LND..E..GDVM VLRPLSYCA ETDLAK FAEAM..KF PII PC .D... L CGSQ  |
| tr A0A084UBG3 A0A084UBG3_9RHIZ | IND..E..GDVN VLRPLSFCAS EDLAR FADAM..KF PII PC .D... L CGSQ  |
| tr A0A2S9IKS0 A0A2S9IKS0_9RHIZ | VND..E..GDLM LLRPLAYAA EEDLEK FAAAM..RF PII PC .D... L CGSQ  |
| tr A0A2K9ECD1 A0A2K9ECD1_9RHOB | LNE..E..GDLN LLRPLAYIA ESDCDR FARAM..NY PII PC .D... L CGSQ  |
| tr A0A258ELF7 A0A258ELF7_9RHOB | LNE..D..GDLF VARPLAFVA EEDCGK FAAAM..GY PII PC .D... L CGSQ  |
| tr A0A2M8N1N7 A0A2M8N1N7_9RHOB | LNE..D..GDLF VARPLAFVA EADCAR FAQAM..NY PII PC .D... L CGSQ  |
| tr A0A0Q6CSE7 A0A0Q6CSE7_9RHIZ | LND..E..GDVM VLRPLISSA EDDI AKFTAAL..GF PII PC .D... L CGSQ  |
| tr A0A2D7LFX0 A0A2D7LFX0_9RHOB | VNE..E..KDLF VYRPLAYVA ETDCEK FSKQM..DY PII PC .D... L CGSQ  |
| tr A0A2D8YFN5 A0A2D8YFN5_9RHOB | LND..A..GDLF VLRPLITCA EDDLAK FAEAM..EF PII PC .N... L CGSQ  |
| tr A0A0M3T332 A0A0M3T332_9RHIZ | LND..E..GDLF VLRPLVYAA EEDI EKFSQAM..QF PII PC .N... L CGSQ  |
| tr A0A0M6XVB7 A0A0M6XVB7_9RHOB | LND..E..GDLL VLRPLAHVA EADCDR FARAM..DY PII PC .D... L CGSQ  |
| tr W6VXL4 W6VXL4_9RHIZ         | LND..E..GDMM VLRPLAYCA EDDLAK FAAAM..QF PII PC .D... L CGSQ  |
| tr K2NTH0 K2NTH0_9RHIZ         | LND..E..GDMM VLRPLSYCA EVDLAK FADQM..RF PII PC .D... L CGSQ  |
| tr K2MG66 K2MG66_9RHIZ         | LND..E..GDVM VLRPLSYCA EADLAR FADAM..RF PII PC .D... L CGSQ  |
| tr A0A0Q8IP21 A0A0Q8IP21_9RHIZ | VND..E..GDLA VLRPLIYCA EEDLQK FSDAM..QF PII PC .D... L CGSQ  |
| tr A0A0F5FNU3 A0A0F5FNU3_9RHIZ | LND..E..GDVE VLRPLIYCA EEDLAR FAEAM..AF PII PC .D... L CGSQ  |
| tr A0A0F5LYW5 A0A0F5LYW5_9RHIZ | LND..E..GDVE VLRPLIYCA EDDLQR FSDAM..AF PII PC .D... L CGSQ  |
| tr A0A1E4BZ93 A0A1E4BZ93_9RHIZ | LNE..D..GETL VLRPLAYAA EDDI ARFATAM..QF PII PC .D... L CGSQ  |
| tr A0A2W4Y544 A0A2W4Y544_9RHOB | LNE..E..GDLF VLRPLAFVA EADCDR FARAM..NY PII PC .D... L CGSQ  |
| tr A0A1G7GDx2 A0A1G7GDx2_9RHOB | LNE..E..GDLT VLRPLAYVA EADCEK FARDM..AY PII PC .D... L CGSQ  |
| tr A0A238URK6 A0A238URK6_9RHOB | LNE..D..GDLL VLRPLAYVA EADCEK FSRAM..NY PII PC .D... L CGSQ  |
| tr A0A1E4FYF9 A0A1E4FYF9_9RHIZ | VND..E..GDLE VLRPLIYCA EEDLQR FSDAM..QF PII PC .D... L CGSQ  |
| tr A0A0F5QJ07 A0A0F5QJ07_9RHIZ | LND..E..GTVE VLRPLIFCA EDDLQK FSDAM..AF PII PC .D... L CGSQ  |
| tr A0A1G3G740 A0A1G3G740_9RHOB | VNE..E..GDLF LYRPLAFVA EADCD FAKAM..NY PII PC .D... L CGSQ   |
| tr A0A2S1C1I6 A0A2S1C1I6_9RHOB | VNE..E..GDLF LARPLAFVP EADCDR FARAM..NY PII PC .D... L CGSQ  |
| tr A0A1M7SPV7 A0A1M7SPV7_9RHOB | LNE..E..GDLL VLRPLAFVA EADCAR FARAM..NY PII PC .D... L CGSQ  |
| tr M9RLX6 M9RLX6_9RHOB         | LNE..Q..GDLF VFRPLAHVA EENCEK FSSSM..GY PII PC .D... L CGSQ  |
| tr A0A238K9T4 A0A238K9T4_9RHOB | LNE..E..GDLF VYRPLAHVA EADCEK FASAM..GY PII PC .D... L CGSQ  |
| tr A0A1Y5S1U1 A0A1Y5S1U1_9RHOB | VNE..E..GDLF VYRPLAHVA EVDCEK FSTSM..GY PII PC .D... L CGSQ  |
| tr A0A1I3LLP4 A0A1I3LLP4_9RHOB | RND..E..GDLM VLRPLAHVA EADCEK FARDM..GY PII PC .D... L CGSQ  |
| tr A0A1I3Z0S5 A0A1I3Z0S5_9RHIZ | LND..E..GDVM VLRPLSYCA EADLAK FAGIM..QF PII PC .D... L CGSQ  |
| tr A0A1T4LDM3 A0A1T4LDM3_9RHIZ | VND..E..GDVM VLRPLIRAA EEDLGR FSAAL..GF PII PC .D... L CGSQ  |
| tr C7D7D6 C7D7D6_9RHOB         | VND..E..GDLF LFRPLAHVA EADCEK FARAM..NY PII PC .D... L CGSQ  |
| tr A0A0R2TQ71 A0A0R2TQ71_9RHOB | LNE..E..GDLF VYRPLAFVA EADCEK FAAAM..QY PII PC .D... L CGSQ  |
| tr A0A1Q3KQX4 A0A1Q3KQX4_9RHIZ | VND..E..GDVT VLRPLISLCA EADLAR FAEAM..AF PII PC .D... L CGSQ |
| tr A0A2T7FWC9 A0A2T7FWC9_9RHOB | VNE..E..GDLT VYRPLAHVA EADCEK FATAM..GY PII PC .D... L CGSQ  |
| tr A0A2D7D4Q1 A0A2D7D4Q1_9RHOB | VNE..E..GDLF LYRPLAHVA EQDCER FSRAL..KY PII PC .D... L CGSQ  |
| tr B6B0B9 B6B0B9_9RHOB         | LNE..E..GDLF VYRPLAHVA EVDCEK FASAM..NY PII PC .D... L CGSQ  |
| tr A0A1H3LLW2 A0A1H3LLW2_9RHOB | VNE..E..GDLF VYRPLAHVA EVDCEK FARDL..NY PII PC .D... L CGSQ  |
| tr A0A1I0XGW3 A0A1I0XGW3_9RHOB | LNE..E..GDVF VYRPLAHVA EADCEK FARAM..SY PII PC .D... L CGSQ  |
| tr LONFM3 LONFM3_9RHIZ         | LND..E..GDLL VLRPLAYCA EDDLAR FAQAM..EF PII PC .D... L CGSQ  |
| tr A0A0Q6EW32 A0A0Q6EW32_9RHIZ | LND..E..GDLF VLRPLIRSA EEDLAR FAAAL..DV PII PC .D... L CGSQ  |
| tr A0A2G6IVP7 A0A2G6IVP7_9RHOB | LND..A..GDLF VYRPLAHVA EADCEK FANSM..NY PII PC .G... L CGSQ  |
| tr A0A2D9RGP6 A0A2D9RGP6_9RHOB | LND..E..GDVM VLRPLIRSE EADI EKFASGM..NF PII PC .T... L CGSQ  |
| tr A0A0K0TWP8 A0A0K0TWP8_9RHIZ | LND..E..GDVQ VLRPLIYCA EPDLAR FAEVM..AF PII PC .D... L CGSQ  |
| tr A0A2Y9AFJ0 A0A2Y9AFJ0_9RHOB | RND..E..GDLL VLRPLAHVA EADCEK FARAM..DY PII PC .D... L CGSQ  |
| tr A0A1H8A7L7 A0A1H8A7L7_9RHOB | KND..D..GDLF LYRPLAHVA EADCD FARAM..NY PII PC .D... L CGSQ   |
| tr A0A081MIH6 A0A081MIH6_9RHIZ | LND..E..GDLF VLRPLAYCA EDDLAR FSAAM..AF PII PC .D... L CGSQ  |
| tr A0A2E2EWC2 A0A2E2EWC2_9RHOB | LND..E..GDLF VYRPLAHVA EADCEK FSRAM..NY PII PC .D... L CGSQ  |
| tr A3VF87 A3VF87_9RHOB         | VNE..E..GDLF VFRPLAHVA EADCEK FSRDM..GY PII PC .D... L CGSQ  |
| tr A0A1M5ABX1 A0A1M5ABX1_9RHIZ | VNE..E..GDIF VLRPLAYAA EDDI ERFSSLM..QF PII PC .D... L CGSQ  |
| tr A0A059X5C8 A0A059X5C8_9BACT | LND..E..GDLT VLRPLAYAA EADLAR FAGLM..NF PII PC .D... L CGSQ  |
| tr A0A1M6C338 A0A1M6C338_9RHIZ | LND..D..GDLL VLRPLIASS EGDI ARFAAAM..RF PII PC .D... L CGSQ  |
| tr A0A1K2HSP5 A0A1K2HSP5_9RHIZ | LND..E..GDVE VLRPLIYCA EDDLAR FAEAM..AF PII PC .D... L CGSQ  |
| tr A0A2G1QM78 A0A2G1QM78_9RHIZ | VND..E..GDVE VLRPLAYCA EADLEK FARHM..AF PII PC .D... L CGSQ  |
| tr A0A1L3SU86 A0A1L3SU86_9RHIZ | VND..D..GDVM VLRPLAYCGE KDLAR FADAM..RF PII PC .D... L CGSQ  |
| tr A0A2EOITN2 A0A2EOITN2_9RHOB | LND..E..GDVQ VLRPLSYCA ENDLEK FAVAM..KF PII PC .D... L CGSQ  |
| tr A0A1M3KMG7 A0A1M3KMG7_9RHIZ | LND..E..GDVE VLRPLIYCA EPDLAK FSELM..AF PII PC .D... L CGSQ  |
| sp Q11IV8 TTCA_CHESB           | LND..E..GDVL VLRPLAYCA ETDLVK FAEGM..KF PII PC .D... L CGSQ  |
| tr A0A1M2Z5F2 A0A1M2Z5F2_9RHIZ | MND..E..GDVM VLRPLSYCA EADLAR FAEAM..RF PII PC .D... L CGSQ  |
| tr A0A2S8EVT0 A0A2S8EVT0_9RHOB | INE..E..GDLY VHRPLAFVA EEDCAR FARAM..RF PII PC .D... L CGSQ  |
| tr A0A1U9JU25 A0A1U9JU25_9RHIZ | LND..E..GDLT VLRPLVYAA EEDLAK FATHM..EF PII PC .N... L CGSQ  |
| tr E6YQZ3 E6YQZ3_9RHIZ         | IND..E..KDLF VLRPLIYAA EEDI EKFSQAM..QF PII PC .N... FCGSQ   |
| tr A0A2D9WU28 A0A2D9WU28_9GAMM | LSD..D..GQNI LIRPLIYCR ESLI QWSDYR..RY PII PC .N... L CGSQ   |
| tr A0A254R6N5 A0A254R6N5_9RHOB | VNE..D..GDLF VYRPLAYVA EADCEK FARDM..NY PII PC .D... L CGSQ  |
| tr A0A2E1LQ03 A0A2E1LQ03_9RHOB | IND..E..GDIE VLRPLITSA EADLEK FAAAL..DF PII PC .N... L CGSQ  |
| tr A0A1I7CMN1 A0A1I7CMN1_9RHOB | VNE..A..GDLF LYRPLAHVA EEDCDR FARAM..NY PII PC .D... L CGSQ  |
| tr K1JJDA K1JJDA_9BURK         | RSD..D..KRNV VIRPLAYVR ESETEK FAKIR..QY PLTSK..G... ICGAG    |
| tr S3CA62 S3CA62_9BURK         | KND..R..GDCV VIRPLAYVR EAE TAKMAKIR..GY PLAAK..G... ICGAG    |
| tr R7C157 R7C157_9BURK         | FSD..D..HNNT VIRPLIYVR EYENLK WAKIQ..EY PLAPK..D... ICGAG    |
| tr H3KHG5 H3KHG5_9BURK         | RSD..D..KKNV VIRPLAYVR EYETEK YAKAK..GY PLAAK..G... ICGAG    |
| tr A0A2H5W0L3 A0A2H5W0L3_9BACT | LSD..D..GQNV VIRPLCYIF EDEIRQ YVPHHT..GA PVVPC..A..SPYCE.D   |
| tr A0A0G4EZY9 A0A0G4EZY9_9ALVE | VSES.R..GGIH VLRPLIRCL ESDI AEFARRG..GF PII PC .T... L CGSQ  |
| tr A0A1G1MFT4 A0A1G1MFT4_9BACT | ELFK..G..GKIV IIRPLAYVE ENLIRK FVKVE..KF PLYD..C..ICPNIF     |
| tr D6YZP9 D6YZP9_DESAT         | RLFA..G..GRLH LIRPLALLSK EMIQQL GLRFL..AVA AVP..N..PCPLTD    |
| tr Q1NPM6 Q1NPM6_9DELT         | HLFA..G..GRLQ LIRPLALLEK AMVH QLGELF..KVE AVA..N..PCPLTD     |
| tr A0A1G1KMU0 A0A1G1KMU0_9BACT | ELFG..G..GKIV IIRPLCYVG EDMLRK FAKES..KF PSQL..C..KCPNSR     |
| tr A0A1V4Y2S8 A0A1V4Y2S8_9DELT | PIFG..G..GATK IIRPLAYIR EELVKK YSRER..EF PILE..S..ACPTGP     |
| tr A0A2HOM0T2 A0A2HOM0T2_9BACT | VLFFK..G..GAIT IIRPLAYVD EDLIVK LAREL..EF PHHK..C..TCPNSV    |
| tr A0A2G6NFX5 A0A2G6NFX5_9DELT | TLFD..G..GALT VIRPLAFLD ESAET YSRQO..AF PICE..N..PCPSAG      |
| tr A0A1V4XPE0 A0A1V4XPE0_9DELT | PIFG..G..GKMH IIRPLTLIR EELIKK YSRER..NF PIIE..S..SCPTGS     |
| tr A0A0F0CSK6 A0A0F0CSK6_9BACT | ELFE..G..GRLT IIRPLCYVE EEMIKT FVKEH..GL PEQF..C..KCPFGK     |
| tr A0A2H0LZG9 A0A2H0LZG9_9BACT | ELFG..G..GKLT LIRPLAYVM EETIRG FAKTL..DF PIQR..C..KCPNSF     |
| tr A0A1H7YYF0 A0A1H7YYF0_9DELT | PIFG..G..GSMH IIRPLAYLR EELIKK YSRER..EF PIIE..S..SCPTGP     |
| tr A0A1V5SHM5 A0A1V5SHM5_9BACT | SIFG..G..GKMH IVRPLAYIK EELIKK YAREQ..EI PVIP..N..GCPSSR     |
| tr A0A1G1Q3T7 A0A1G1Q3T7_9BACT | PMFK..G..GKIS IIRPMCLVE EDMIGT YAKY..EL PNOL..C..KCPFGK      |
| tr A0A2N5YRU6 A0A2N5YRU6_9BACT | DMFE..G..GRIQ LIRPMILLN KNEVQD FSKLO..SF PGEKE..C..ICPWS     |
| tr A0A1V5BSS2 A0A1V5BSS2_9DELT | EMFD..G..GELA IIRPLAYVE EKELLRL LATKL..QL PVSG..S..DCPHGK    |
| tr A0A1V4Y2C6 A0A1V4Y2C6_9DELT | PIFG..G..GSMH IIRPLTYIR EELIKK YSRER..EF PIVE..S..SCPTNP     |
| tr A0A2M7F5M5 A0A2M7F5M5_9BACT | ELFK..G..GDLY LIRPLAYCR EEMIRE YARQH..GL PVRE..E..ACQEGGP    |
| tr A0A2G6GY47 A0A2G6GY47_9BACT | RMFD..G..GRIE LIRPLDLD ERLLGD YAERA..DLV KIEK..H..CPHED      |
| tr A0A2L1GPK6 A0A2L1GPK6_9DELT | RLFR..G..GQLT VIRPLAYVE KADIAA ALAMN..RLQ PVA..S..SCPLAG     |
| tr A8ZUJ5 A8ZUJ5_DES0H         | PMFG..G..GKVT LVRPLALAD EKDIQR FAGHL..RF PEFK..N..PCPSAE     |
| tr A0A1E7JE91 A0A1E7JE91_9DELT | PEFG..G..GKLT VIRPLAFLD ESTISR FAENQ..GF PEFK..N..SCPTAK     |
| tr A0A1V5KTE6 A0A1V5KTE6_9BACT | RIKN..G..GRFH LLRPLVFE EALIKR FAAEF..AI CFPS..Q..QCPTDG      |
| tr A0A1G3NZH6 A0A1G3NZH6_9SP1R | KYNK..G..FPCT IIRPLAYVR EEIIN YAGKM..DILS IV..C..TCPFGK      |
| tr A0A1V5CAM1 A0A1V5CAM1_9DELT | EMFK..G..GKVF IIRPLAYVQ EKELKR VAAKL..EL PVIR..S..QCINGE     |
| tr A0A1I7LC33 A0A1I7LC33_9BACT | EMFK..G..GKVI LIRPLIFVE KMDLSR FVKAQ..GWE ILE..N..PCPFS      |
| tr A0A1G1LQR4 A0A1G1LQR4_9BACT | ELFG..G..GKIT IIRPLAYER ENNMVN LAKKL..NIES IGGQS..KCANDE     |

|                                |             |                                          |
|--------------------------------|-------------|------------------------------------------|
| tr A0A1V5I5K2 A0A1V5I5K2_9SPIR | SMFG...GEFD | IIRPLGLLAKREVRDYARLI..GFPTAGM...ECPWSE   |
| tr A0A1Y1CNQ1 A0A1Y1CNQ1_9BACT | SMFQ...GNII | LIRPLILLLKDAEMREYSRIR..KFVLEKE...LCPHQD  |
| tr A0A1Y1S2G7 A0A1Y1S2G7_9SPIO | KYDR...YPQR | VIRPLCYIKEREIVEFAELM..GFSTYA..T.SCPYQG   |
| tr A0A2N2Z2D1 A0A2N2Z2D1_9BACT | SMFE...GDLR | IIRPLITVHDKELVEYNSYM..GFDEITS...LCPYED   |
| tr A0A1V6ALY3 A0A1V6ALY3_9DELT | SIFG...GKLG | IIRPLAYLTEDLVKKYSRER..QFPTVA..N.ECPTSG   |
| tr A0A0W8FQ52 A0A0W8FQ52_9ZZZZ | SIFG...GKLG | IIRPLAYLQEEELIKKYSKER..QFPTVT..N.DCPTSI  |
| tr E4T2Z7 E4T2Z7_PALPW         | KMKN...FDMA | IIRPLALISEKEMKEMERIE..AYQKQIK..N.NCPHEK  |
| tr A0A1G1KVT8 A0A1G1KVT8_9BACT | ELFD...GKVT | IIRPLAYERETMIRLAQRL..NITQIG..QS.KCANEE   |
| tr A0A2N2HPG2 A0A2N2HPG2_9DELT | EFFG...GKLV | IIRPLAYLEGLVKKYAREQ..GIPAVK..N.NCPTSD    |
| tr A0A2G6MFG2 A0A2G6MFG2_9DELT | ELFE...GNLH | VIRPLAYCHKAEVEKIGRMF..GFKGIP..S.SCPILSE  |
| tr A0A0Q1C8R9 A0A0Q1C8R9_9DELT | SIFG...GKLG | IIRPLTYLQEEELIKKYSKER..RFVVLK..N.NCPTSK  |
| tr A0A1V6ISQ0 A0A1V6ISQ0_9DELT | SIFG...GKLG | IIRPLVYLSALVKKYSRER..RFVVLK..N.DCPTSK    |
| tr A0A091FEB2 A0A091FEB2_9DELT | SIFG...GKLG | IIRPLAYLQEEELVKKYSRER..QFPAVK..N.DCPTSL  |
| tr A0A2N7PKR2 A0A2N7PKR2_9BACT | EMFK...GDLY | LIRPLFYVEKDMISRFVKQR..GWRILE..N.NCPTSE   |
| tr A0A2N2G9N5 A0A2N2G9N5_9DELT | SIFG...GKLG | IIRPLSYLRDELVKKYSRER..QFPTVK..N.NCPTSE   |
| tr A0A2N2LS17 A0A2N2LS17_9DELT | SIFG...GKLG | IIRPLAYLRDELVKKYSREQ..EFPAVK..N.NCPTSE   |
| tr A0A1W9PYD7 A0A1W9PYD7_9DELT | PMFG...GKVT | IIRPLAFADESDIRFSKHS..GFPFSK..N.NCPTSAE   |
| tr A0A0U5AFN2 A0A0U5AFN2_9BACT | EMFK...GTLY | LIRPLFYVEKDMISRFVAKM..GWDVLE..N.NCPTSG   |
| tr A0A0N0D6Q9 A0A0N0D6Q9_9DELT | SLFQ...GKLT | VIRPLAYTSDIIRHFVKS..QLPEFI..N.NCPTSV     |
| tr A0A1F9B7K1 A0A1F9B7K1_9DELT | KIFG...GKLG | IIRPLAYLRDELIKKYQRE..FFPTVE..N.NCPTSK    |
| tr A0A1V5K7L8 A0A1V5K7L8_9BACT | GIFS...GTLH | IIRPLVYVREELIKKYSRER..GFPVVK..N.NCPTSA   |
| tr E8RFH6 E8RFH6_DESPD         | ELFA...GRLS | LIRPLAYLDKSEIAAIGGEL..GLEPVR..S.TCPLSE   |
| tr A0A177E5Z2 A0A177E5Z2_9BACT | EMFK...GELY | IIRPMTFVEKKLISAYAKAE..NLPVFS..N.NCPTSA   |
| tr A0A1W9PEQ4 A0A1W9PEQ4_9BACT | SVFR...GKFH | IIRPLIYIEEALKKFALEQ..HFPLLN..N.NCPTSE    |
| tr A0A1G1CL22 A0A1G1CL22_9BACT | SLFK...GALA | LIRPLSLIEEDKIQAIVKLR..ALPEVK..D.CCPSRG   |
| tr A0A1M7AKX7 A0A1M7AKX7_9DELT | EFFG...GEIT | VIRPLAYTDEKNIAFYFARAM..NMPETIE..N.NCPTSG |
| tr A0A1E7H3V6 A0A1E7H3V6_9DELT | TFFD...GKLT | VIRPLAFTDKKLIARFARKN..NLPDLT..N.NCPTSAQ  |
| tr A0A1V4XEJ8 A0A1V4XEJ8_9DELT | EIFG...GRLH | IIRPLAYLRDELVKKYARQR..RLPETE..N.NCPTSR   |
| tr A0A1F9LPM9 A0A1F9LPM9_9DELT | KIFD...DRVS | LIRPMAYLEKGEIREIAATL..GIQPVK..N.NCPTSD   |
| tr A0A1V5DP79 A0A1V5DP79_9DELT | RIFG...GKLG | IIRPLAYLPKVIKKYSQER..CFPTVK..N.NCPTSE    |
| tr A0A2N2KLB2 A0A2N2KLB2_9DELT | RIFG...GKLG | IIRPLAYLPDELVKKYSRER..QFPAIK..N.NCPTSE   |
| tr K0NEP7 K0NEP7_DESTT         | AFFN...GAID | IIRPLSYVDKEDIRFGOLF..DLPFEK..N.NCPTSA    |
| tr R5PGT4 R5PGT4_9BACT         | SMFG...GSFT | LIRPFIYLTNETVRYAQYR..GFRKQKK..N.NCPTSE   |
| tr A0A2G6FDN7 A0A2G6FDN7_9DELT | ELFD...GELS | VIRPLAYCDKQETSSLVNKL..DLTPVS..S.DCPLSE   |
| tr A0A2G6NS68 A0A2G6NS68_9DELT | DFFN...GRFK | IIRPLCLVDKDKIKSFIKTS..GLPVFK..N.NCPTSG   |
| tr F8C1Q1 F8C1Q1_THEGP         | EMFK...GKLY | IIRPLILVEKDLISRFVKKM..NWKVLE..N.NCPTSK   |
| tr A0A2N2J4R6 A0A2N2J4R6_9DELT | KIFG...GKLG | IIRPLAYLRDELVKKYSQER..QIPVFK..N.NCPTSL   |
| tr A0A175JL87 A0A175JL87_ENTHI | TEK...YGVK  | FIRPLIEVPVVFIQEWTKYI..ELPRLI..N.NCPTSE   |
| tr A0A2N7QB7 A0A2N7QB7_9BACT   | EMFK...GKLY | IIRPLILVEKDLISRFVKKM..GWNLE..N.NCPTSK    |
| tr A0A1V4CH87 A0A1V4CH87_9DELT | DMFE...GELA | IIRPLAYVEKELLKLSRQM..NLPITA..S.ACPHSQ    |
| tr A0A1F3PRW0 A0A1F3PRW0_9BACT | KMFS...GRVL | LVRPLLFHLEKDVQQYSYDR..NFKLIEK..N.NCPTSD  |
| tr A0A1F9NE61 A0A1F9NE61_9DELT | SFFQ...GTLD | IIRPLSYVEKDKIVRFAQSS..GLPEFR..N.NCPTSA   |
| tr A0A0S8HC42 A0A0S8HC42_9BACT | RMFN...GRID | LIRPLLTIPENELAYYAGLK..NLKEHEK..N.NCPTSD  |
| tr A0A1T5DAY4 A0A1T5DAY4_9BACT | KMDK...FDMT | LIRPLCLVEEKELIRIAEWK..GYKKLLK..N.NCPTSE  |
| tr A0A2N6C0V8 A0A2N6C0V8_9DELT | ELFK...GNLA | IIRPLAFLQKQETELAEPL..GFAPVA..N.NCPTLG    |
| tr A0A1V5PLF0 A0A1V5PLF0_9BACT | YAD...GINI  | VIRPLVYVEKDIKAYADYM..KFPETIE..N.NCPTSG   |
| tr A0A2G6GMA7 A0A2G6GMA7_9DELT | SFFD...GALD | IIRPLSYVESDDIQAQLSQAL..EMPVEF..N.NCPTSA  |
| tr A0A1F3EKI2 A0A1F3EKI2_9BACT | KMFE...GKLS | VIRPLMLLSNEIKKEFAAIR..RFKNEIK..N.NCPTSK  |
| tr A0A0S8K9N6 A0A0S8K9N6_9BACT | EVFA...GKYR | IIRPLAYIDEFLLKRFAGEY..QLPVLP..N.NCPTQI   |
| tr A0A2J6HPZ6 A0A2J6HPZ6_9BACT | DMFD...GAIQ | AIRPLILLTNKDTSEFARIR..NYPPLKA..N.NCPTSE  |
| tr C7XC62 C7XC62_9BACT         | RMDK...GRME | IIRPMCLVEERELIQVAWK..GYRKQLK..N.NCPTSE   |
| tr A0A1F8ZX57 A0A1F8ZX57_9DELT | SLFK...GRLT | IIRPLALLEENRIKHFTRRR..GLPETP..N.NCPTSA   |
| tr A0A2J6I6B5 A0A2J6I6B5_9BACT | KMFS...GEIE | IIRPLILLTNKDTTEFAKIK..NYPPLKK..N.NCPTSD  |
| tr A0A0F8WA15 A0A0F8WA15_9ZZZZ | TMFE...GRIR | LIRPLLFIPETLIEYANVR..NFKLEK..N.NCPTSE    |
| tr A0A179D358 A0A179D358_9BACT | EMFG...GKLY | LIRPLVLVEKESLKAYAQKE..GFPIVE..N.NCPTSG   |
| tr I5B503 I5B503_9DELT         | SFFG...GHFN | IIRPLSYIEKHEINSFAKVY..NLPFEV..N.NCPTSA   |
| tr A0A0S7YQR2 A0A0S7YQR2_9DELT | PFFK...GLFT | VIRPLALVEELIRRFARQQ..NFPFRF..N.NCPTSA    |
| tr A0A2N1RRG9 A0A2N1RRG9_9SPIR | PMFG...GEFD | LIRPLILLLGEIREYAVLK..KYPPOVK..LCPHGD     |
| tr A0A1V5PXE4 A0A1V5PXE4_9CHLR | EYFG...GQLT | LIRPLIYVTEAETIRPYARAC..GWEFPEL..N.NCPTSK |
| tr A0A1W1HKF9 A0A1W1HKF9_9DELT | DFFG...GELT | IIRPLAYLEKSELKLAIF..DFPDEF..N.NCPTSD     |
| tr A0A1G3QGUS A0A1G3QGUS_9SPIR | SMFG...GEFD | IIRPLILHLEKDVREYARIR..GFPTEKS..N.NCPTSD  |
| tr A0A1Y3VSZ0 A0A1Y3VSZ0_9BACT | EMFK...NTFT | LIRPLIYLSNDETSRYAEMR..QFKKQKK..N.NCPTSK  |
| tr A0A0S8HXB5 A0A0S8HXB5_9DELT | SYFR...GEFH | LIRPFAYTDEYLLKRFAGEA..GLPVMK..N.NCPTAD   |
| tr A0A2J0MG88 A0A2J0MG88_9BACT | EMFK...GKLS | IIRPLAYVDEDDIELARLN..HLPVPH..N.NCPTNT    |
| tr A0A2N5YKJ4 A0A2N5YKJ4_9BACT | SFFD...GKFD | IIRPLILISEPETIRYSEIY..SFPDEEQ..N.NCPTSE  |
| tr A0A0C3M8X7 A0A0C3M8X7_9PORP | EMFG...GTLF | IIRPLIYLGNAETLKYATLR..QFKQKK..N.NCPTSK   |
| tr A0A1Q6ILQ5 A0A1Q6ILQ5_9BACT | AMFD...RTFT | LIRPFIYLTDEETTRYAAYR..NFKKQKK..N.NCPTSK  |
| tr A0A235BV29 A0A235BV29_9BACT | ELFK...GGII | VIRPLIYIDKTMITNYLKQA..RIRSV..N.NCPTSE    |
| tr C0QKM8 C0QKM8_DESAH         | SFFD...GTLE | IIRPLAYVEKRRIVLSSESL..GFPAFK..N.NCPTSD   |
| tr A0A1G3KZR6 A0A1G3KZR6_9SPIR | QLFK...GDLS | IIRPLGLLLKEIEAIVSQEM..GFIPAT..N.NCPTAD   |
| tr A0A0S8CMA5 A0A0S8CMA5_9DELT | ELFN...GRVH | IIRPMAYLEKDDIEIAAAA..DIIPVK..N.NCPTDN    |
| tr A0A1F9KX79 A0A1F9KX79_9DELT | SFFG...GKLD | IIRPLSYVEKDKIVKFAQSL..GLPEFR..N.NCPTSA   |
| tr A0A1V1WWT4 A0A1V1WWT4_9DELT | PFFG...GTLD | VIRPLAYVHEQAIARFAQDH..NFPDCE..N.NCPTAK   |
| tr A0A1V5D1F3 A0A1V5D1F3_9DELT | EMFE...GELA | IIRPLAYVEKELARLATIL..ELPVAA..N.NCPTSK    |
| tr R5UPE7 R5UPE7_9BACT         | AMFD...GTFT | LIRPFIYITNAETQYAYR..NFRKQKK..N.NCPTSE    |
| tr A0A1W9N5C1 A0A1W9N5C1_9DELT | SLFQ...GRFT | VIRPLAFTDENIRRFATSR..HFPFV..N.NCPTSA     |
| tr A0A1V4WN49 A0A1V4WN49_9DELT | EMFD...GELA | IIRPLAYVEKELTRLATIL..DLPVIA..N.NCPTSG    |
| tr A0A1G5FPP5 A0A1G5FPP5_9DELT | SMFG...GEVT | VIRPLYLAEESDVRFASEQ..GLPVYS..N.NCPTSA    |
| tr A0A0S8CTV5 A0A0S8CTV5_9DELT | KLFD...GRTH | IIRPMAYLEKDDIEIAAAA..SIVPVK..N.NCPTDN    |
| tr A0A1W9LXP4 A0A1W9LXP4_9DELT | PFFN...GKIN | VIRPLAFADDELIARFAKAQ..GFPNFV..N.NCPTSA   |
| tr A0A1W9TE89 A0A1W9TE89_9DELT | SFFQ...NKYT | IIRPLAFADDEVIIRFAREQ..AFPDEFV..N.NCPTSA  |
| tr A0A1W9MR5 A0A1W9MR5_9DELT   | EMFE...GRFV | IIRPLAFADDELIIRFGARR..GFPETI..N.NCPTSA   |
| tr A0A1F9XAQ0 A0A1F9XAQ0_9BACT | KMFN...GEFD | LIRPMVLEEKSIREYVKKM..NIPHST..N.NCPTSE    |
| tr A0A2N1TLK9 A0A2N1TLK9_9SPIR | AVFD...GKLE | IIRPLALLAEKIAEYARIR..AFPPOKK..N.NCPTSE   |
| tr A0A2J0L3R7 A0A2J0L3R7_9BACT | KMFG...GELY | LIRPLAYVEYELARFAEEC..KFPKLP..N.NCPTSD    |
| tr S7VA23 S7VA23_DESML         | PFFQ...GAFT | VIRPLAFSDEEVIIRFAKEM..AFPDEFV..N.NCPTSA  |
| tr A0A0S8AN01 A0A0S8AN01_9DELT | KLFA...GRIH | IIRPMAYLEKDDIEIAAAA..AIMPVK..N.NCPTDN    |
| tr A0A1V6ILX3 A0A1V6ILX3_9DELT | ELFE...GRLA | IIRPLAYVEELARLASML..SLPVVS..N.NCPTSM     |
| tr A0A1G1LWP2 A0A1G1LWP2_9BACT | ELFD...GKLT | IIRPLAYVREAMVRLAQEL..GIAGMG..QS.KCAND    |
| tr A0A2N6C2B7 A0A2N6C2B7_9DELT | KLFN...GRIH | IIRPMAYLEKDDIEIAVTA..SIVPVK..N.NCPTDN    |
| tr A0A0S8D245 A0A0S8D245_9BACT | KLFN...GRVH | IIRPMAYLEKKNIEIAAAA..SIMPVK..N.NCPTDE    |
| tr A0A1W9XBN0 A0A1W9XBN0_9DELT | PFFQ...GRFT | VIRPLAFADDEMIIRRFARTR..HFPDEFV..N.NCPTAK |
| tr A0A0S8CT17 A0A0S8CT17_9BACT | EFFN...GKVT | AIRPLMYLDENTIQRYAKSM..EWPRI..N.NCPTAG    |
| tr A0A2H0A696 A0A2H0A696_9DELT | PFFK...GKIS | VIRPLAYVEENIRRIAKDR..EFPFV..N.NCPTAA     |
| tr A0A1F9DQR6 A0A1F9DQR6_9DELT | EFFG...GSIT | VIRPFYMDERTIERAYELM..GFPRI..N.NCPTAG     |
| tr A0A2H0Y7C6 A0A2H0Y7C6_9BACT | ELFK...GKIT | LIRPLAYVEHMKRFAKEE..GLPNQT..N.NCPTSK     |
| tr A0A2H0LLJ5 A0A2H0LLJ5_9BACT | ELFK...GAIT | IIRPLAYVDEDLIKLAKVL..EFPHHK..N.NCPTSK    |
| tr A0A255TIW6 A0A255TIW6_9BACT | HMRK...MPIT | IIRPLCYCEKDIREYATIEA..GYQKQVK..N.NCPTSE  |
| tr A0A0S8IL95 A0A0S8IL95_9BACT | SLFN...GKIT | VIRPLCYVEDMINRRCRES..KLSHNT..N.NCPTSE    |
| tr A0A1V6BW42 A0A1V6BW42_9SPIR | KYKK...FDLT | IIRPLADIKEDIRFAKEK..SYQNLG..N.NCPTSA     |
| tr A0A1V5X014 A0A1V5X014_9BACT | ELFK...GKIT | IIRPLAYVEEMIKFAREE..NIPHDR..N.NCPTSK     |
| tr A0A1G3LC27 A0A1G3LC27_9SPIR | KYDK...YDIT | IIRPLADIKEDIRFAKEK..SYQNLG..N.NCPTSA     |
| tr A0A1F9X0A6 A0A1F9X0A6_9BACT | NMFE...GKFH | LIRPMVYIEKTIIRQYVSKM..KIPHST..N.NCPTSK   |



tr|K0TEQ7|K0TEQ7\_THAOC  
tr|A0A1F7WSR4|A0A1F7WSR4\_9BACT  
tr|A0A1V5UNH9|A0A1V5UNH9\_9BACT  
tr|D8EW05|D8EW05\_9DELTA  
tr|A0A2M7WL85|A0A2M7WL85\_9BACT  
tr|A0A2N2L507|A0A2N2L507\_9DELTA  
tr|A0A2V8MSX9|A0A2V8MSX9\_9BACT  
tr|A0A2V8IYI6|A0A2V8IYI6\_9BACT  
tr|A0A1Q7Q2X8|A0A1Q7Q2X8\_9BACT  
tr|A0A1E7FQ90|A0A1E7FQ90\_9STRA  
tr|W0E7L8|W0E7L8\_MARPU  
tr|W0DRV9|W0DRV9\_9GAMM  
tr|A0A0U5IH88|A0A0U5IH88\_9GAMM  
tr|A0A1F6SXEO|A0A1F6SXEO\_9PROT  
tr|A0A259RK82|A0A259RK82\_9GAMM  
tr|A0A2M7W840|A0A2M7W840\_9PROT  
tr|A0A1V5H9F1|A0A1V5H9F1\_9BACT  
tr|A0A0W1RTX5|A0A0W1RTX5\_9GAMM  
tr|H1G0J5|H1G0J5\_9GAMM  
tr|A0A1N6HH77|A0A1N6HH77\_9GAMM  
tr|I3CE71|I3CE71\_9GAMM  
tr|A0A1H6FDH4|A0A1H6FDH4\_9GAMM  
tr|A0A1Z4VND3|A0A1Z4VND3\_9GAMM  
tr|A0A191ZII6|A0A191ZII6\_9GAMM  
tr|A0A1B1YWK5|A0A1B1YWK5\_9GAMM  
tr|A0A0G3G524|A0A0G3G524\_9GAMM  
tr|A0A1V2ZXF9|A0A1V2ZXF9\_9GAMM  
tr|A0A0T5Z793|A0A0T5Z793\_9GAMM  
tr|A0A167BM25|A0A167BM25\_9GAMM  
tr|A0A1V6FEE6|A0A1V6FEE6\_9BACT  
tr|I3YFC1|I3YFC1\_THIV6  
tr|A0A1V3NV21|A0A1V3NV21\_9GAMM  
tr|D3RS48|D3RS48\_ALLVD  
tr|A0A212A5R9|A0A212A5R9\_9GAMM  
tr|A0A0S8L2L3|A0A0S8L2L3\_9PROT  
tr|A0A251X597|A0A251X597\_9GAMM  
tr|A1AAMW5|A1AAMW5\_RUTMC  
tr|A0A2A4Y8M7|A0A2A4Y8M7\_9GAMM  
tr|S6AB33|S6AB33\_9PROT  
tr|B7J9K8|B7J9K8\_ACIF2  
tr|A0A2N2ADN2|A0A2N2ADN2\_9GAMM  
tr|A0A1Y1QE10|A0A1Y1QE10\_9GAMM  
tr|A0A1Y1QFH0|A0A1Y1QFH0\_9GAMM  
tr|A0A1G5QYX5|A0A1G5QYX5\_9GAMM  
tr|A0A1I4R3K0|A0A1I4R3K0\_ECTMO  
tr|A0A0S8A3Y3|A0A0S8A3Y3\_9GAMM  
tr|A0A1I1V1C9|A0A1I1V1C9\_9GAMM  
tr|A0A2S0KWB3|A0A2S0KWB3\_9BACT  
tr|A0A1W9L8C2|A0A1W9L8C2\_9GAMM  
tr|A0A0S7ZXH3|A0A0S7ZXH3\_9GAMM  
tr|A0A1F3X099|A0A1F3X099\_9PROT  
tr|A0A1G0KZY9|A0A1G0KZY9\_9GAMM  
tr|A0A1W9X6P0|A0A1W9X6P0\_9GAMM  
tr|F6DB14|F6DB14\_THICA  
tr|A0A1V5UV62|A0A1V5UV62\_9BACT  
tr|A0A1T2LC98|A0A1T2LC98\_9GAMM  
tr|A0A2N9YAV2|A0A2N9YAV2\_9GAMM  
tr|A0A2H6JDM1|A0A2H6JDM1\_9BACT  
tr|A0A1Q4GEE4|A0A1Q4GEE4\_9PROT  
tr|A0A257SZR7|A0A257SZR7\_9GAMM  
tr|A0A1J4Z8U3|A0A1J4Z8U3\_9PROT  
tr|A0A258YXM3|A0A258YXM3\_9PROT  
tr|A0A2G6DJM5|A0A2G6DJM5\_9PROT  
tr|A0A2V2H125|A0A2V2H125\_9BACT  
tr|S6BUZ7|S6BUZ7\_9GAMM  
tr|A0A1W1DV63|A0A1W1DV63\_9ZZZZ  
tr|A0A1W1DVN7|A0A1W1DVN7\_9ZZZZ  
tr|LOGXD5|LOGXD5\_9GAMM  
tr|A0A1B4V026|A0A1B4V026\_9GAMM  
tr|A0A1C2G3X4|A0A1C2G3X4\_9GAMM  
tr|A0A1T2L835|A0A1T2L835\_9GAMM  
tr|A0A1Y0G9Z9|A0A1Y0G9Z9\_9PROT  
tr|A0A090ADU8|A0A090ADU8\_9GAMM  
tr|A0A0M1J7T8|A0A0M1J7T8\_9GAMM  
tr|A0A2G6C8I0|A0A2G6C8I0\_9GAMM  
tr|W0TIV9|W0TIV9\_9GAMM  
tr|A5CWN0|A5CWN0\_VESOH  
tr|A0A0E9MCP1|A0A0E9MCP1\_9PROT  
tr|V4JHL8|V4JHL8\_9GAMM  
tr|A0A1P8UKQ4|A0A1P8UKQ4\_9GAMM  
tr|A0A0S8DUY2|A0A0S8DUY2\_9GAMM  
tr|H8Z182|H8Z182\_9GAMM  
tr|A0A1F6TVT2|A0A1F6TVT2\_9PROT  
tr|A0A1E2UNR3|A0A1E2UNR3\_9GAMM  
tr|A0A2T6NDJ0|A0A2T6NDJ0\_9GAMM  
tr|A0A1H6M1D9|A0A1H6M1D9\_9GAMM  
tr|E6QSG6|E6QSG6\_9ZZZZ  
tr|A0A1W1CJ00|A0A1W1CJ00\_9ZZZZ  
tr|A0A2N6TKT8|A0A2N6TKT8\_FUSNU  
tr|A0A133ZWE3|A0A133ZWE3\_9FUSO  
tr|A0A1G3X6G4|A0A1G3X6G4\_9BACT  
tr|U7UME2|U7UME2\_9FIRM  
tr|C9MWY3|C9MWY3\_9FUSO  
tr|A0A2X2N7I0|A0A2X2N7I0\_9FUSO  
tr|U2RCS2|U2RCS2\_9FUSO  
tr|E3HAQ4|E3HAQ4\_ILYPC  
tr|D7N7Y7|D7N7Y7\_9FIRM  
tr|B6FWA2|B6FWA2\_9FIRM  
tr|A0A1V5HMD1|A0A1V5HMD1\_9BACT  
tr|EONJU2|EONJU2\_9FIRM  
tr|D1AP34|D1AP34\_SEBTE  
tr|A0A134AL16|A0A134AL16\_9FIRM  
tr|A0A120KNK8|A0A120KNK8\_9FUSO

R|SAA.R...DIH|VLRPLISCV|ENDIAE|FAREM..NF|FILPC|.N...|LCGSQ  
D|SS..G...KKFR|VIRPLMYVS|EDTTQK|YCAKM..EF|PAITC|.C.CPQ|SCAG  
E|VG..S...KKFR|VIRPLMYVS|EDTTQK|YCAKM..EF|PAITC|.C.CPQ|SCAG  
E|LFG...GKLT|LIRPLYLDD|EDLIRRY|YGEKM..DF|PEIR|.L.NCP|SA..G  
Q|AD..D...KPIT|VIRPLYVVF|ERETMR|YAIES..EF|PVVCC|.K.CP|ICG  
S|IFD...GKLT|LIRPLAYLKE|ELVKKY|SRER..QF|PTVK|.N.CCP|TS..H  
Q|SQ..K...GNVR|LIRPLVYVT|EDLS TE|YARAQ..GF|LP IAC|.V...|CSEK  
Q|SQ..K...GNVR|LIRPLVYVN|EALSRE|YARTQ..GF|LP IAC|.V...|CSEK  
Q|SQ..K...GNVR|LIRPLVYVT|EDLSME|YARAQ..GF|LP IAC|.V...|CSEK  
T|SQ..R...GKLA|VMRPLIKSF|EKDIEE|YAQLS..KF|PILPC|.N...|LCKNQ  
R|NQ..E...GDLR|VIRPLAYCR|ERQTAD|FAAHA..GL|PVVPD|.S.CP|ACFT  
R|ID..A...GDLR|VIRPLVYVR|ERQTRD|FARTA..EL|PVIAD|.N.CP|ACFA  
L|NN..E...GDVR|LIRPLVYCR|ERQTAD|YAERA..EL|PVVMD|.S.CP|ACFS  
L|ND..A...GDVR|LIRPLVYVR|ERQTRD|FAERO..GL|PAIRD|.N.CP|ACFT  
L|ND..A...GDVR|LIRPLVYVR|ERQTRD|FATQN..QL|PVIRD|.N.CP|ACFA  
A|VR..E...GDLR|VIRPMALVR|ERQNRAY|YVAEA..GI|PVIEE|.N.CP|ACLMEEK  
A|ADA.G...SRR|LIRPLYRVPK|VIRTA|AAEL..AL|PTFS|.N.CP|ADLM  
L|ND..A...GDVR|LIRPLVTVR|ESALAD|FARRN..DL|PVIPT|.N.CP|ACFA  
R|IE..A...GDLR|VIRPLVYAR|ERRIRD|FAHKA..GL|PIMEE|.N.CP|TRFG  
L|NN..E...GDLR|LIRPLVYVR|ENQCR|FAEQ..NL|PVIPT|.N.CP|ACYS  
T|ND..A...GDLR|LIRPLIYVR|ERQTAD|FAKSA..KL|PIILD|.N.CP|ACFT  
T|ID..A...GDLR|VIRPLVYVR|ERQTRD|FAQQA..AL|PIILD|.S.CP|ACFS  
R|ND..D...GDLR|LIRPLVYVR|ERQTRD|FAASA..GF|PVIRD|.N.CP|ACFR  
R|ND..A...GDLR|LIRPFVVRV|ERQTRD|FARTN..GL|PVIKD|.N.CP|ACFA  
T|ND..D...GDLR|VIRPLVYAR|ERQTRD|FAESA..PL|PVIPT|.N.CP|CDS  
A|ID..A...GDLR|VIRPLVYVR|ERQTRD|FADAA..GL|PVILD|.N.CP|ACFA  
R|ID..A...GDLR|VIRPLVYVR|ERQTRD|FAEAA..GL|PVILD|.N.CP|ACFS  
R|ND..A...GDLR|LIRPLVYCR|ESMTGA|FARDA..GL|PIITP|.S.CP|ACFT  
R|IE..S...GDLR|VIRPLVYAR|ERQTRD|FARSA..AL|PIQEE|.N.CP|TRYG  
A|ADG.G...SKR|LIRPLCTISK|ARISALA|AQL..DY|PAVK|.N.CP|QEDL  
T|NQ..E...GDVR|VIRPLVYCR|ERQTAD|YAVRA..GL|PVIPT|.S.CP|ACFS  
C|ID..A...GDLR|VIRPLVYVR|ERQTAD|FARAA..GL|PVISE|.N.CP|ACFD  
R|NQ..D...GDVR|LIRPLVYCR|ERQTAD|FARRA..GL|PVIPT|.S.CP|ACFT  
L|NN..E...KDIR|VIRPLVYVR|ESQTR|FAEAA..GL|PVITD|.N.CP|ACYS  
V|ID..A...GDLR|VIRPFYVVR|ERQTHD|FASRA..GL|PAIVD|.N.CP|ACFR  
Q|ID..T...GDLR|VIRPLVYVR|ERQTA|FAKAA..QL|PVVPD|.N.CP|ACFT  
I|ND..A...KDLR|LIRPLAYVR|ERQTRD|LANFAKTI..CL|PVIKD|.S.CP|ACYQ  
Q|ND..A...GDVR|VIRPLVYVR|ERQTRD|YAKAA..GL|PVIAD|.S.CP|ACFQ  
L|ND..A...GDVR|VIRPFAYVR|ERQTRD|YVQSA..AL|PIITP|.N.CP|ACFG  
R|VR..E...GDLR|VIRPLVYCR|ERQTRD|FATEQ..AL|PVIEH|.N.CP|ACFG  
T|ID..A...GDLR|VIRPLIYVR|ERQTRD|FAEAA..QL|PVIPE|.N.CP|ACFD  
R|ID..A...GDLR|VIRPLVMVR|ERQTRD|FAKAA..AL|PVIVE|.N.CP|MCFD  
V|ND..V...GDLR|LIRPLVYAR|ERQTRD|FAQSA..EL|PVIPT|.N.CP|ACFA  
R|IQ..E...GDLR|VIRPLVYAR|ERQTRD|YARGA..GL|PVQAE|.H.CP|ARGR  
V|ID..D...GDLR|VIRPLIYAR|ERQTRD|YATEC..NL|PVVAD|.S.CP|SCFG  
R|IN..A...GDLR|VIRPFALVR|ERQTRD|FAERA..GL|PVIPT|.S.CP|ACFG  
A|AKA.K...EGIR|LIRPFVLAP|ESLIVR|CREER..EL|PQAGK|.N.CP|YAEAL  
T|ND..T...GDVR|VIRPLVYAR|ERQTRD|FAHAA..NL|PIITP|.N.CP|ACFA  
Y|NE..H...RDVR|VIRPMIYVR|ERQTRD|YAKEA..GL|PLIAE|.S.CP|ACVI  
V|ND..A...GDLR|LIRPFYIAR|ERQTRD|FAQNA..PL|PVVHE|.N.CP|ACFG  
L|NK..E...GDLR|VIRPLVYVR|ERQTRD|FAFQA..GL|PVVPD|.S.CP|ACFT  
T|ND..A...GDVR|LIRPLVFA|ERQTRD|FAKEA..QL|PVIPT|.S.CP|ACFT  
L|NN..E...KDIR|LIRPFVVRV|ERQTRD|FAASA..GL|PVIPT|.N.CP|ACFA  
P|AEE.H...EVR|LIRPLAFAP|ESLLAG|IAAEM..EL|PVIRGE|.N.CP|YKNEL  
T|NR..E...GDVR|LIRPLAYVR|ERQTRD|FAKNA..NL|PVIPT|.S.CP|ACFS  
T|ND..A...GDLR|VIRPLIYAR|ERQTRD|FAKAT..QL|PVIPT|.N.CP|ACFS  
R|ND..A...GDLR|LIRPLIYAR|ERQTRD|FAFARA..SL|PVIPT|.N.CP|ACFG  
L|ND..A...GDLR|LIRPFAYAR|ERQTRD|FAADA..GL|PVIFE|.N.CP|ACFA  
R|ND..A...GDVR|VIRPLIYVR|ERQTRD|FAHMA..AL|PVISE|.N.CP|ACFG  
Q|ID..A...GDLR|VIRPLIYAR|ERQTRD|FAIHA..GL|PVIAE|.N.CP|ACFA  
L|ND..A...GDLR|LIRPFAYAR|ERQTRD|FAIDA..AL|PVIIS|.N.CP|CFFA  
R|VD..A...GDLR|VIRPLVYAR|ERQTRD|FAQTA..GL|PVIIE|.N.CP|ACFD  
P|AKS.E...PGVR|LIRPFALAP|ESLIK|SLCTQW..DL|PAAGK|.N.CP|YETEL  
V|ND..A...GDLR|VIRPLVYVR|ERQTRD|FATDA..GL|PIITP|.S.CP|ACFS  
I|ND..A...KDLR|LIRPMVYVR|ERQTRD|FAKTA..DL|PVIAD|.S.CP|ACFS  
I|ND..D...KDLR|VIRPMVYVR|ERQTRD|FAKTT..DL|PVIAD|.S.CP|ACFS  
R|ND..A...GDLR|LIRPLAYCR|ERQTRD|FAFAEA..GL|PVVPD|.S.CP|ACFT  
R|ND..A...GDLR|VIRPLVYVR|ERQTRD|FAFARA..AL|PVVTD|.N.CP|ACFR  
R|VD..A...GDLR|VIRPFYIAR|ERQTRD|FAFARA..AL|PVIPT|.N.CP|ACFR  
L|ND..A...GDVR|LIRPLVYAR|ERQTRD|FAFAEA..EL|PVIFE|.N.CP|ACFE  
T|ND..A...GDVR|LIRPLVYAR|ERQTRD|FAKSA..NL|PVVQE|.N.CP|ACFS  
T|ND..T...GDLR|VIRPLIYVR|ERQTRD|FAQSA..QL|PVIAD|.S.CP|ACFA  
L|ND..A...GDLR|VIRPLVYCR|ERQTRD|FANTA..NL|PVIID|.N.CP|ACFA  
L|ND..A...GDLR|LIRPLVYVR|ERQTRD|FAKEQ..EL|PVIIE|.N.CP|ACFS  
L|ND..A...GDLR|LIRPLVYVR|ERQTRD|FAQAA..GL|PIITP|.S.CP|ACFT  
I|ND..A...KDLR|VIRPLTYAR|ERQTRD|FAKIT..HL|PVIKD|.S.CP|ACYQ  
L|ND..K...GDLR|VIRPFYAR|ERQTRD|FAKNS..EL|PVIFE|.N.CP|ACFG  
R|ND..A...GDLR|LIRPLAYCR|ERQTRD|YAIKA..EL|PVVPD|.S.CP|ACFS  
V|TD..A...GDLR|VIRPLVYAR|ERQTRD|FAQAA..AL|PIITE|.N.CP|ACCG  
L|ND..E...GDVR|LIRPFYIAR|ERQTRD|FAFAEA..RL|PVIAD|.S.CP|ACFT  
R|ID..A...GDLR|VIRPLVYCR|ERQTRD|CAYETA..AL|PVVPD|.S.CP|ACFD  
V|ND..A...GDLR|VIRPFVYAR|ERQTRD|FARSA..AL|PVIAD|.N.CP|ACFR  
V|ND..A...GDLR|LIRPLVYCR|ERQTRD|FAVKA..GL|PIITP|.S.CP|ACFT  
L|ND..A...GDLR|LIRPLVYCR|ERQTRD|FAVEA..GL|PIITP|.S.CP|ACFT  
I|ND..N...KDLR|VIRPMAYVR|ERQTRD|FAKSA..DL|PVIPT|.S.CP|ACFS  
T|ND..A...GDLR|LIRPLVYAR|ERQTRD|FAQLA..NL|PVIIE|.N.CP|ACFA  
V|ND..T...KDLR|LIRPLVYVR|ERQTRD|FANNH..NL|PIIKD|.N.CP|ACFE  
P|STS.G...KMD|LIRPLAYVR|EKDIN|FMKHN..EI|QAMSC|.G.CP|IEAG  
K|SDN.F...N.IE|LIRPLAYVE|EKDIN|KWRNN..GI|LMNC|.G.CT|YAAE  
K|AEN.F...EDIE|LIRPMFVE|EKDIN|IRWTVRS..GI|QAMNC|.G.CT|YVAAE  
H|SDN.F...ENME|LIRPMYVE|EAIKRF|MRFT..GLRPLDC|.A.CA|VTKR  
P|STS.G...KLE|LIRPLIYVK|EADID|YTKTN..GI|RAMNC|.G.CT|IEAG  
P|STS.G...NLT|LIRPMVNVH|EADID|YTKTN..GI|RAMNC|.G.CV|IEAG  
K|STS.G...KLE|LIRPLIYVR|EADIE|YTKTN..GI|RAMNC|.G.CT|IEAG  
K|STS.G...KLG|LIRPMIYVK|EADID|YTKTN..GI|SPMTG|.G.CP|IESG  
H|SDN.F...EGLE|LIRPMYVE|EAIKRF|MRST..GLHALDC|.A.CA|IAEK  
K|SKS.S...GEMQ|LIRPLIYIR|EYIKR|FVRYT..GI|EPLDC|.A.CT|VTSK  
K|SKN.F...PGME|LIRPLIYFVW|EKDIN|FMKYI..GI|EAMSC|.G.CK|IGDG  
K|AQN.F...ENME|LIRPMYVE|EADID|YTKTN..GI|TAMDC|.A.CT|VTSK  
D|STS.G...KLG|LIRPLIYVE|EKDIN|YTKTN..GI|LAMNC|.G.CT|IEAG  
H|ATN.F...EGME|LIRPMYIR|EDVRR|FVKAN..DLTPIDC|.A.CT|VTEK  
L|STS.G...KLE|LIRPLIYVK|ESDID|YTRTN..GI|RAMNC|.G.CT|IEAG

tr|G4D179|G4D179\_9FIRM  
tr|A0A2N1QJ52|A0A2N1QJ52\_9BACT  
tr|D0GMS6|D0GMS6\_9FUSO  
tr|A0A0E3Z9Z8|A0A0E3Z9Z8\_9FUSO  
tr|A0A0941J11|A0A0941J11\_9BACT  
tr|A0A2N1Q4T2|A0A2N1Q4T2\_9BACT  
tr|A0A1W9SAA9|A0A1W9SAA9\_9BACT  
tr|A0A0E3UUB0|A0A0E3UUB0\_9FUSO  
tr|A0A2A1ZTD9|A0A2A1ZTD9\_9BACT  
tr|R5FR46|R5FR46\_9FIRM  
tr|U7VDB0|U7VDB0\_9FUSO  
tr|A0A1T4JV61|A0A1T4JV61\_9FUSO  
tr|A0A1E9ISJ7|A0A1E9ISJ7\_9FUSO  
tr|C3WD69|C3WD69\_FUSMR  
tr|A0A017H8K4|A0A017H8K4\_9FUSO  
tr|R5HS15|R5HS15\_9MOLU  
tr|A0A1W9W0E5|A0A1W9W0E5\_9BACT  
tr|A0A137SW00|A0A137SW00\_9FIRM  
tr|A0A2U1E5L2|A0A2U1E5L2\_9FIRM  
tr|A0A175JJ18|A0A175JJ18\_ENTHI  
tr|C3WD70|C3WD70\_FUSMR  
tr|A0A1W9TJ18|A0A1W9TJ18\_9BACT  
tr|A0A2G6MQK6|A0A2G6MQK6\_9DELT  
tr|A0A1W1BBY5|A0A1W1BBY5\_9ZZZZ  
tr|I7H559|I7H559\_9HELI  
tr|V8C7C8|V8C7C8\_9HELI  
tr|C3XIF2|C3XIF2\_9HELI  
tr|A0A1Y1RC03|A0A1Y1RC03\_9PROT  
tr|A0A1W1ED80|A0A1W1ED80\_9ZZZZ  
tr|A0A1W1CKY4|A0A1W1CKY4\_9ZZZZ  
tr|A0A1W9NWV6|A0A1W9NWV6\_9PROT  
tr|I2K6H1|I2K6H1\_9PROT  
tr|A0A1W1BSJ9|A0A1W1BSJ9\_9ZZZZ  
tr|A0A2G2M8Q2|A0A2G2M8Q2\_9PROT  
tr|A0A2G2MUF3|A0A2G2MUF3\_9PROT  
tr|E6X2C6|E6X2C6\_NITSE  
tr|A0A2G6GA80|A0A2G6GA80\_9BACT  
tr|A0A0S4PXK8|A0A0S4PXK8\_9HELI  
tr|Q7VFR3|Q7VFR3\_HELHP  
tr|A0A2D3WHB1|A0A2D3WHB1\_9PROT  
tr|A0A1W1EIA6|A0A1W1EIA6\_9ZZZZ  
tr|A0A1W1CNU7|A0A1W1CNU7\_9ZZZZ  
tr|A0A0C2ZBG5|A0A0C2ZBG5\_9PROT  
tr|A0A0S4XP57|A0A0S4XP57\_9PROT  
tr|A0A099TV95|A0A099TV95\_9HELI  
tr|A0A1W1E737|A0A1W1E737\_9ZZZZ  
tr|A0A268TK66|A0A268TK66\_9HELI  
tr|A0A268U7R3|A0A268U7R3\_9HELI  
tr|A0A268TAM2|A0A268TAM2\_9HELI  
tr|A0A268TTH0|A0A268TTH0\_9HELI  
tr|V8CIS8|V8CIS8\_9HELI  
tr|A0A1W1CJT9|A0A1W1CJT9\_9ZZZZ  
tr|G2HW59|G2HW59\_9PROT  
tr|A6DBX7|A6DBX7\_9PROT  
tr|A0A099DQ03|A0A099DQ03\_9HELI  
tr|A0A1V9VEV7|A0A1V9VEV7\_9PROT  
tr|C5ZWI6|C5ZWI6\_9HELI  
tr|A0A099VW01|A0A099VW01\_9HELI  
tr|A0A099TJT3|A0A099TJT3\_9HELI  
tr|A0A259HBH4|A0A259HBH4\_9PROT  
tr|Q3Q0R3|Q3Q0R3\_SULDN  
tr|A0A1G3US09|A0A1G3US09\_9HELI  
tr|I3XVB8|I3XVB8\_SULBS  
tr|B9L800|B9L800\_NAUPA  
tr|A0A2U8FFP3|A0A2U8FFP3\_9HELI  
tr|A0A2D5P7H2|A0A2D5P7H2\_9PROT  
tr|A0A268U8R8|A0A268U8R8\_9HELI  
tr|A0A1B1U570|A0A1B1U570\_9HELI  
tr|A0A099B6Z7|A0A099B6Z7\_9HELI  
tr|A0A0C2ZDN3|A0A0C2ZDN3\_9PROT  
tr|A0A292YDX3|A0A292YDX3\_9PROT  
tr|A7H006|A7H006\_CAMC5  
tr|U2F8G7|U2F8G7\_9PROT  
tr|E7G3J2|E7G3J2\_9HELI  
tr|H5VC43|H5VC43\_HELBI  
tr|A0A268U060|A0A268U060\_9HELI  
tr|A0A087M8T0|A0A087M8T0\_9PROT  
tr|A0A2A2GQP1|A0A2A2GQP1\_9HELI  
tr|A0A2A6W9V1|A0A2A6W9V1\_HELPH  
tr|A0A0C2Z9Q1|A0A0C2Z9Q1\_9PROT  
tr|B9CYD9|B9CYD9\_CAMRE  
tr|A0A2N1J2R6|A0A2N1J2R6\_9PROT  
tr|A0A0K2XD11|A0A0K2XD11\_9HELI  
tr|A0A1I5SJS5|A0A1I5SJS5\_9PROT  
tr|A0A1B3XCA3|A0A1B3XCA3\_CAMCO  
tr|A0A1B9FAV1|A0A1B9FAV1\_9PROT  
tr|A0A2X4PH55|A0A2X4PH55\_HELMT  
tr|T1D2B1|T1D2B1\_9HELI  
tr|A0A1Y5DTG6|A0A1Y5DTG6\_9PROT  
tr|A0A1W1CJN1|A0A1W1CJN1\_9ZZZZ  
tr|A0A1W1CXB3|A0A1W1CXB3\_9ZZZZ  
tr|A0A0A8GW05|A0A0A8GW05\_9PROT  
tr|A0A0A8H088|A0A0A8H088\_9PROT  
tr|A0A1W1WUK6|A0A1W1WUK6\_9PROT  
tr|A0A076FD18|A0A076FD18\_9PROT  
tr|A0A2G1YNP8|A0A2G1YNP8\_9HELI  
tr|A0A071LP71|A0A071LP71\_9PROT  
tr|A0A1W1BTA3|A0A1W1BTA3\_9ZZZZ  
tr|A6Q4A8|A6Q4A8\_NITSB  
tr|A0A0C2ZLF5|A0A0C2ZLF5\_9PROT  
tr|Q4HQZ0|Q4HQZ0\_CAMUP  
tr|A0A2D3W138|A0A2D3W138\_9HELI  
tr|A0A1W6BVM8|A0A1W6BVM8\_9PROT

HSQN.F..EGLELIRPMYVREESVINFINST..GLHALDC..A.CEVAQK.  
KSEN.Y..EGIELIRPMYFIKEDIERFRKYH..HLESMSC..G.CRIARN.  
KSTS.G...NLSLIRPLIYVRADIEYTKEN..GIRPMNC..G.CTIEAG.  
HNDN.F..D.IELIRPLFYVEKDIRRFVKEYT..DLTPMAC..G.CEYVAKG.  
KSKN.F..EGLELIRPMYLIKEDIKIKLMDTN..NVVTMDK..G.CELQAC.  
KQN.Y..EGLELIRPMYLIKEDVERFIKYH..NITINSK..G.CFFQER.  
KSKN.Y..EGIELIRPMYLIKENDIERFVKEYH..DISFPSK..G.CEFQDR.  
QSES.G...NLSLIRPMVYVHEEDINFTKSN..NIRAMSC..G.CRVEQN.  
KQN.F..EGLELIRPMYLIKEDIIRLMEAN..DIHSMNC..G.CVVASG.  
KSTN.H..PGMELIRPMVKIQEKDINFMAF..EISP..G.CKVAAAG.  
KSTS.G...RLELIRPLIYIKENDINFTKKN..EIMAMAC..G.CPIESG.  
KSTS.G...KLELIRPLIYIKEDIISYTEKN..EIQAMAC..G.CPIESG.  
KSTS.G...KMELIRPMVYIKEDIAYTQRN..EIEAMGC..G.CPVESG.  
SSTS.G...KMAVIRPLVYIKEDIAYTQRN..EIKAMSC..G.CPIESG.  
SSTS.G...KLQVIRPLVYVKEODIKSFMKHN..EIEAMSC..G.CPVESD.  
KDH.F..ENMYLIRPLIYVRKDIKVKFAQTN..ELKF..A.CSVTKK.  
KSTS.G...KLSLIRPMVYIKESINFTKRN..GIKPMSC..G.CPVESG.  
RSEN.F..EDMELIRPMYFIEESVRRYMRHI..GIEALDC..A.CSITEK.  
DSAN.H..PGIKLIRPLIYLVGESDIKFRDYI..GLES..R.CVLSEG.  
TTEK...YGIKFVIRPLIEVPVVLIQEWTKYI..ELPR..R.CKYEK.  
VEE.Y...GVRVIRPLAYVEADIRYVKKQ..ELPVVAS..D.CPYETS.  
KSET.G...KFEVIRPMVYVKEKNIAIYMSKK..NVELLNC..G.CDFENE.  
SFFS...GRFDLIRPLSYVEKHQINSFAKVC..ELPQFV..NR.CPSAG.  
KTS..R..GF.HLIRPLIEARERKQLQAFVDDN..NLNTIGD..ES.CPAMI.K.  
RAE..N..GLE.VIRPLIFMRERQIDFIASN..GIYIAPD..CN.CPINWLD.  
KAQ..N..GL.FVIRPMIFVVRERQIDFIASN..QIYIAPD..CN.CPINWLP.  
KAQ..N..GL.GVIRPLIFVVRERQIDFIASN..NIYIAPD..CN.CPINWLP.  
RAE..N..GL.LVIRPMIMVREROLIDAALAN..HLPTIGD..EA.CPMR.F.  
KTS..R..GF.HLIRPLIQARETOLRAFAVDN..NLQVIGD..EA.CPAML.K.  
KTG..R..GF.HLIRPLIQARETOLRAFAVDN..HLQVIGD..EA.CPAML.K.  
KTG..R..GF.HLIRPLIQARETOLRAFAVDN..NLQVIGD..EA.CPAML.K.  
KTS..R..GF.HLIRPLIQARETOLRAFAVDN..NLQVIGD..EA.CPAML.K.  
KTS..R..GF.HLIRPLIQARETOLRAFAVDN..NLQVIGD..EA.CPAML.K.  
KAD..R..HGF.VVIRPLIEARERKQLQAFVDDN..NLNTIGD..ES.CPAMI.K.  
KNK..H..NQ.TVIRPLICFLREKQLSDFTKKN..SFETAGD..EM.CPGIA..  
RAQ..N..GL.EVIRPLIFVVRERQIDFIASN..YIYIAPD..CN.CPINWLD.  
RAQ..N..GL.EVIRPLIFVVRERQIDFIASN..HIYIAPD..CN.CPINWLD.  
KTG..R..GF.HLVIRPLIQVRESOLRAFAVDN..DLQTIGD..EA.CPAML.K.  
KTE..R..GF.HLIRPLIEVRESOLRGFANDN..SFATIGD..EA.CPAML.K.  
KTK..R..GF.HLIRPLIEVRESOLRGFANDN..NLQVIGD..EA.CPAML.K.  
KTE..R..GF.HLIRPLIQARETOLRAFAVDN..SIQTIGD..ES.CPAMM.K.  
KTN..R..GV.HLIRPLIQARETOLRAFAVDN..NIQTIGD..ES.CPAMM.K.  
KAQ..N..GL.GVIRPLIFVVRERQIDFIASN..NIYIAPD..CN.CPINWLP.  
KTG..K..GF.HLIRPLIQVRESOLRGFANDN..NLQVIGD..EA.CPAML.K.  
RAE..N..GL.HVIRPLIHIRETQIDFVKSQ..NIP..CN.CPAKQPD.  
RAE..N..GL.GVIRPLIHIRETQIDFVKSQ..NIP..CN.CPAKQPD.  
QAE..N..GL.HVIRPLIHIRETQIDFVKSQ..NIP..CN.CPAKQPD.  
RAE..N..GL.EVIRPLIHIRETQIDFVKSQ..NIP..CN.CPAKQPD.  
RAQ..N..GL.YVIRPLIFVVRERQIDFIANN..NIYIAPD..CN.CPINWLP.  
TAA..N..GL.IVIRPLIQMREOLRAFAVDN..EISATIGD..EA.CPAMR.F.  
KAE..N..GL.EVIRPLIFCREROLRAFANTN..EINVTIGD..EA.CPGLR.F.  
KAN..S..GI.EVIRPMIKVRERKWIYEMVSKN..NFPIINGEES..CLAKD..S.  
RAE..N..GL.EVIRPLIFVVRERQIDFIASN..SIYIAPD..CN.CPINWLD.  
KAS..N..GL.EVIRPLIFCREROLRAFADSN..EIRVIGD..EA.CPGLR.F.  
KAQ..N..GL.YVIRPLIFVVRERQIDFIASN..NIYIAPD..CN.CPINWLP.  
KAG..N..GL.FVIRPLIFVVRERQIDFIASN..NIYIAPD..CN.CPINWLP.  
KAQ..N..GL.GVIRPLIFVVRERQIDFIASN..NIYIAPD..CN.CPINWLP.  
KAQ..R..GF.HLIRPLIMVRESOLRGFANDN..GLVAIGD..EA.CPAML.K.  
KAD..R..GV.IVIRPLIEMREROLRAFAVDN..NIETIGD..EA.CPMSMR.F.  
KAD..R..GV.TVIRPLIQMREOLRAFAVDN..CIETIGD..EA.CPMSMR.F.  
TAQ..N..GL.EVIRPLIHAREOLRDCAKEH..NMPTIGD..EA.CPAMR.F.  
KAY..N..EI.EVIRPLIKVRERKWIYEMVSKN..NFPIIDGESS..CLAFNE..S.  
KAE..N..GL.YVIRPLIFVVRERQIDFIASN..NIYIAPD..CN.CPINWLP.  
KAE..N..GL.EVIRPLIFCREROLRAFAVDN..EINVTIGD..EA.CPGLR.F.  
KAE..N..GL.EVIRPLIHVRESOLRGFANDN..GLVAIGD..EA.CPAML.K.  
QAE..N..GL.WVIRPLIFVVRERQIDFIASN..NIYIAPD..CN.CPINWLP.  
RAE..N..GL.QVIRPLIFVVRERQIDFIASN..GIYIAPD..CN.CPINWLP.  
KTE..R..GF.HLIRPLIEVRESOLRGFANDN..NLQVIGD..EA.CPAML.K.  
TAY..T..GL.EVIRPMIKVRERKWIYEMVSKN..NFPIIDGESS..CLAFNE..S.  
KAK..N..GI.EVIRPFIFVVREROLRENAIRN..ELRVIGD..EA.CPAMR.F.  
TAK..N..GI.TVIRPFIFVVREROLRENAIRN..ELRVIGD..EA.CPAMR.F.  
KAE..N..GL.FVIRPLIHIRETQIDFVKSQ..NIP..CN.CPAKQPD.  
KAE..N..GL.FVIRPLIHIRETQIDFVKSQ..NIP..CN.CPAKQPD.  
KAE..N..GL.EVIRPLIFVVRERQIDFIASN..KIYIAPD..CN.CPINWLP.  
KAQ..N..GL.GVIRPLIHVRESOLRGFANDN..KMPTIGD..EA.CPAMR.F.  
KAQ..N..GL.GVIRPLIFVVRERQIDFIASN..NIYIAPD..CN.CPINWLP.  
RAE..N..GL.LVIRPLIKVREROLRAFAVDN..GIEATIGD..EA.CPAMR.F.  
KTA..R..GF.HLIRPLIEIREOLRSFAKEN..EIEIIGD..EA.CPAMM.K.  
VAA..N..GI.EVIRPFIFVVREROLRENAIRN..GLTVIGD..EA.CPAMR.F.  
KAE..N..GL.EVIRPLIFCREROLRAFAVDN..EISVIGD..EA.CPAMR.F.  
KAE..N..GL.FVIRPLIHIRETQIDFVKSQ..NIP..CN.CPAKQPD.  
KSS..K..GF.HVIRPLIWVRESOLRGFANDN..GIATIGD..EA.CPAMA.M.  
QSK..R..GI.TVIRPLIFVVREROLRDNAIRN..ELSVIGD..EF.CPGMK.LSE.  
QSK..R..GV.IVIRPLIFVVREROLRDNAIRN..ELSVIGD..EF.CPGMK.LSE.  
RAE..N..GI.QVIRPLIHIRETQIDFVKSQ..NIKTAPD..CN.CPAKQPD.  
KAQ..N..GL.YVIRPLIFVVRERQIDFIASN..NIYIAPD..CN.CPINWLP.  
KAE..N..GL.EVIRPLIFCREROLRAFAVDN..ELLVIGD..EA.CPAMR.F.  
RAE..N..GL.IVIRPLIQMREOLRAFAVDN..GIEATIGD..EA.CPAMR.F.  
KAE..N..GL.IVIRPLIQMREOLRAFAVDN..GIEATIGD..EA.CPAMR.F.  
KSK..R..GI.EVIRPLIFVVREROLRENAIRN..ELEVIGD..EF.CPGMK.LSE.  
KSK..R..GI.EVIRPLIFVVREROLRENAIRN..ELEVIGD..EF.CPGMK.LSE.  
KTK..K..GL.YVIRPLIEIRETQIDFVKSQ..GFWAIGD..EA.CPAMR.F.  
KAK..N..GL.IVIRPLINVREROLRDNAIRN..ELFVIGD..EA.CPAMR.F.  
RAD..N..GL.IVIRPLIQMREOLSAFVDDN..NLNATIGD..EA.CPAMR.F.  
TAK..N..GI.EVIRPFIFVVREROLRENAIRN..ELFVIGD..EA.CPAMR.F.  
KAG..N..GL.YVIRPLIQVRESOLRGFANDN..GFEAIGD..EA.CPAMR.F.  
KSS..K..GL.YVIRPLIEIRETQIDFVKSQ..GFEAIGD..EA.CPAMR.F.  
KTE..R..GF.HLIRPLIGVRESOLRAFAVDN..QLSTIGD..EA.CPAML.K.  
KSK..R..GI.TVIRPLIFVVREROLRDNAIRN..ELEVIGD..EF.CPGMK.LSE.  
RAS..N..GL.VVIRPLIQMREOLRAFAVDN..NIQTIGD..EA.CPAMR.F.  
RSK..R..GV.VVIRPLIFVVREROLKDNALIN..ELEVI..EF.CPGMK.LSE.



|                                |              |               |                  |          |         |                    |        |
|--------------------------------|--------------|---------------|------------------|----------|---------|--------------------|--------|
| tr E4U1K2 E4U1K2_SULKY         | KAG..N..GL.I | VIRPLIQLRERQ  | LAAACALEN..EM    | PTTIGD   | EA.CP   | SMR.F              |        |
| tr A0A2N6GCJ3 A0A2N6GCJ3_9HELI | KAD..N..GL.I | VIRPLIQMRERQ  | LAFAADDN..SI     | PTTIGD   | EA.CP   | SMR.F              |        |
| tr A0A2D3W7B7 A0A2D3W7B7_9PROT | KAE..N..GL.E | VIRPLFIHIRER  | LRDQAVRE..NM     | PTTIGD   | EA.CP   | AMR.F              |        |
| tr A0A1W1D2X7 A0A1W1D2X7_9ZZZZ | KAG..N..GL.I | VIRPLFIQMRER  | LAFAVDEN..GF     | YATIGD   | EL.CP   | SIH.F              |        |
| tr A0A2G2ANT9 A0A2G2ANT9_9HELI | KAE..N..GL.I | VIRPLFIQMRER  | LAFAVDEN..NL     | NAIGD    | EA.CP   | AMR.F              |        |
| tr A0A091AJ11 A0A091AJ11_9HELI | KAG..N..GL.I | VIRPLIQLRERQ  | LAAACALEN..EM    | PTTIGD   | EA.CP   | SMR.F              |        |
| tr A0A1B8J7N9 A0A1B8J7N9_9HELI | RAE..N..GL.F | VIRPMIFVVER   | QIIDFIASN..GI    | YIAPD    | CN.CP   | INWLP              |        |
| tr A0A0B0Q4K1 A0A0B0Q4K1_9PROT | KAQ..N..GL.V | VIRPLIHVVER   | QLRECAKEH..GM    | PVIGD    | EA.CP   | AMR.F              |        |
| tr T0JF06 T0JF06_9HELI         | RAD..N..GL.I | VIRPLIQMRERQ  | LAFAVESN..NIA    | AITGD    | EA.CP   | AMR.F              |        |
| tr A0A1J5FJW1 A0A1J5FJW1_9HELI | KAE..N..GL.V | VIRPLIQMRERQ  | LAFAVEEN..NIS    | AITGD    | ES.CP   | SMR.F              |        |
| tr A0A2N6G706 A0A2N6G706_9PROT | KAE..N..GL.E | VIRPLIFCRERQ  | LAFAQTN..EIS     | VIGD     | EA.CP   | AMR.F              |        |
| tr A0A2G2HKJ9 A0A2G2HKJ9_9PROT | TAE..N..GL.E | VIRPLIFCRERQ  | LAFAALKN..EIS    | VIGD     | EA.CP   | AMR.F              |        |
| tr A0A1W9PM77 A0A1W9PM77_9HELI | LAG..N..GL.V | IIRPLIQMRERQ  | LAAAADIN..GW     | PTIGD    | EA.CP   | SMR.F              |        |
| tr A0A2G6DDV7 A0A2G6DDV7_9PROT | TAK..N..GL.I | LIRPLIHVVER   | QLRDNATNN..HLE   | VIGD     | EV.CP   | AMR.F              |        |
| tr A0A1J4TTL2 A0A1J4TTL2_9HELI | KAG..N..GL.I | VIRPLIQMRERQ  | LAAAADEN..SM     | PTVGD    | EA.CP   | AMR.F              |        |
| tr A0A2P8QZA9 A0A2P8QZA9_9PROT | TAE..N..GL.K | VIRPLILVVER   | QLIDCAKNN..ELT   | VSTDEDF  | CPAT    | TKGV               |        |
| tr E0UQV7 E0UQV7_SULAO         | TAQ..N..GL.V | VIRPLIQMRERQ  | LAFAVDEN..GIE    | AITGD    | EA.CP   | AMR.F              |        |
| tr C8FEU9 C8FEU9_9PROT         | VAE..N..GL.V | IIRPFILARERQ  | IAAACARDN..KL    | PIMREEV  | CPARQ   | Y.                 |        |
| tr Q7MR20 Q7MR20_WOLSU         | RAY..N..GL.W | VIRPLIWLVER   | QMVDVFLKN..NL    | QTPL     | CN.CP   | AQ.                |        |
| tr A0A1X9STM1 A0A1X9STM1_9PROT | TAK..N..GL.V | VIRPLINVER    | QLRDNATRN..ELR   | VIGD     | EA.CP   | AMR.F              |        |
| tr A0A128E9T0 A0A128E9T0_9PROT | TAE..N..GL.V | VIRPLILARERQ  | LRDCAIKN..EL     | PIMNEEDS | CPAKQ   | Y.                 |        |
| tr J0LAR5 J0LAR5_9HELI         | EAG..N..GL.E | VVRPLIRVVER   | QLTDGALK..GL     | PLTIGD   | DA.CP   | ALR.F              |        |
| tr A0A1T2XPE8 A0A1T2XPE8_9PROT | KAK..N..GL.E | VIRPLIFVVER   | ERALRENAIRN..NLT | VVGD     | EA.CP   | AMR.F              |        |
| tr A0A1V4R692 A0A1V4R692_9PROT | KAK..N..GL.Q | VIRPLIFCRERQ  | LDGFAKEH..KIET   | ISD      | EN.CP   | AFR.V              |        |
| tr A0A0E9F2V9 A0A0E9F2V9_CHLTH | TAK..N..GL.V | LIRPLIFARERQ  | IRDCAIKN..ELK    | VVGD     | EC.CP   | PAYS.M             |        |
| tr A0A258ZKP3 A0A258ZKP3_9HELI | KAE..N..GL.I | IIRPLIQLRERQ  | LAAACAIEN..EM    | PTVGD    | EA.CP   | SMR.F              |        |
| tr A0A2G2G5A2 A0A2G2G5A2_9PROT | KAG..N..GL.I | IIRPLIQMRERQ  | LAFAVDN..DLE     | AITGD    | EA.CP   | AMR.F              |        |
| tr A0A1G3UGJ6 A0A1G3UGJ6_9HELI | KAE..N..GL.I | VIRPLIQMRERQ  | LAFAALDN..NI     | PTIGD    | ES.CP   | SMR.F              |        |
| tr A0A1G3TFQ9 A0A1G3TFQ9_9HELI | RAE..N..GL.I | VIRPLIQMRERQ  | LAAACAVDN..SM    | PTIGD    | EA.CP   | SMR.F              |        |
| tr A71189 A71189_CAMCH         | KAE..N..QI.V | IIRPLILARERQ  | IRDCAIKN..EM     | PIINEES  | CPAKL   | Y.                 |        |
| tr A0A0C2V6R9 A0A0C2V6R9_9HELI | KAE..R..GV.T | VIRPLIQVVER   | QLIAAALDN..AM    | PTVGD    | EA.CP   | SMR.F              |        |
| tr A0A2G2PC84 A0A2G2PC84_9HELI | KAK..N..GL.I | VIRPLIQMRERQ  | KAFAVEDN..NIE    | AITGD    | EA.CP   | AMR.F              |        |
| tr G4E699 G4E699_9GAMM         | QID..A..GDLR | VIRPLVYVVER   | QTAAFAQAV..GL    | PVIYE    | N.CP    | ACFA               |        |
| tr A0A067A0H6 A0A067A0H6_HYDMR | LNN..E..KDIR | IIRPFVVRVER   | ENTRDFARSA..EL   | PVIPD    | N.CP    | ACYA               |        |
| tr Q31J95 Q31J95_HYDCU         | LNN..E..KDIR | IIRPLVVRVER   | STRAFSENA..EL    | PIIPD    | N.CP    | ACYS               |        |
| tr A0A1A6C120 A0A1A6C120_9GAMM | RID..A..GDLR | VIRPLVYARERQ  | TRAFESA..HL      | PVISE    | N.CP    | ACFA               |        |
| tr A0A257NW40 A0A257NW40_9GAMM | RND..A..GDVR | IIRPFVVRVER   | MLADFAAHN..HL    | PVIKD    | N.CP    | ACFA               |        |
| tr A0A2H6G4E2 A0A2H6G4E2_9BACT | TID..A..GDLQ | VIRPLVYVVER   | QLTKFAEAA..KL    | PVID     | N.CP    | ACFS               |        |
| tr A0A0X3T6D5 A0A0X3T6D5_9GAMM | LNN..D..EDIR | IIRPLVVRVER   | ENQRDFAETA..GL   | PVIQD    | N.CP    | ACYA               |        |
| tr A0A1T4X6M8 A0A1T4X6M8_9GAMM | RID..A..GDLR | IIRPLVQVVER   | QTADFAKAA..GL    | PVIME    | N.CP    | ACFD               |        |
| tr A0A211DJG6 A0A211DJG6_9PROT | RVR..E..GDLR | VIRPLVYCRERQ  | MRQHAEEO..QL     | PVIYE    | N.CP    | ACFG               |        |
| tr F9ZRE2 F9ZRE2_ACICS         | RVR..E..GDLR | VIRPLAYCRERQ  | TRDFAEAT..GL     | PVIPE    | N.CP    | ACFA               |        |
| tr A0A1F6G6B2 A0A1F6G6B2_9PROT | VND..A..GDLR | IIRPFVYARERQ  | TRDFALRA..GL     | PAIMD    | N.CP    | ACFR               |        |
| tr A0A1Z5HNK0 A0A1Z5HNK0_9THEO | YLD..R..TGLT | VIRPLCYFRERE  | IKGAFRFI..NYP    | PVAS     | PCPL    | LNGR               |        |
| tr R5AS17 R5AS17_9FIRM         | RSRN.F..PGME | LIRPMYCIHEDDI | IAWQRYN..GLE     | FTQC     | ACRETE  | HAAAH              |        |
| tr A0A2G3E2W8 A0A2G3E2W8_9FIRM | HSTN.F..PGME | LIRPLYLIRER   | EDIIRWMKLN..DLK  | FTRC     | ACRETE  | MLEAE.VE           |        |
| tr A0A1I2CQ3 A0A1I2CQ3_9FIRM   | KSAN.W..TGME | LIRPMYVVER    | EDIKNWRDEN..HLE  | FTQC     | ACRETE  | QIADAN             |        |
| tr R9KLC2 R9KLC2_9FIRM         | HSTN.F..PGME | LIRPMYVVER    | EDIMMRDYH..GL    | GFLOC    | ACRETES | CAQNSPIHPQPAASGKGS | GEGCAP |
| tr A0A174X0A0 A0A174X0A0_9CLOT | HSTN.F..EGME | LLRPLYVVKER   | EDIIDWKEEN..GLQ  | FTQC     | ACRETE  | AIKERAMRAENTA      | DGM    |
| tr A0A0D0QQ0Q A0A0D0QQ0Q_9FIRM | HSTN.F..EGME | LIRPMYLIRER   | EDDIKAWRDYN..KL  | GFLOC    | ACHFT   | DTCTCTCS           |        |
| tr A0A174KCC2 A0A174KCC2_CLOSY | HSTN.F..EGME | LIRPLYLVKER   | EDIILAWKDYN..GLR | FTQC     | ACRETE  | AAEAV.AG           |        |
| tr R9L8Q4 R9L8Q4_9FIRM         | HSTN.F..EGME | LIRPMYLIRER   | ESDIKAWRDYN..NLT | FTQC     | ACKET   | QNSVFV.N           |        |
| tr A0A1H5TPC7 A0A1H5TPC7_9FIRM | HSTN.F..EGME | LVRLPLYLIRER  | EDIIKWMNYN..NLK  | FTNC     | ACRM    | TERLADSEDA         |        |
| tr A0A1G6DDH6 A0A1G6DDH6_9FIRM | HSEH.F..EGME | LIRPLYLVVER   | ADVIGWAKHN..GLE  | FTQC     | ACRETE  | DEYTHSGD           |        |
| tr A0A1G9SUV6 A0A1G9SUV6_9FIRM | HSTN.F..EGME | LIRPMYLIRER   | EDIKHWCSYN..KLE  | FTAC     | ACRM    | TEALADEN.S         |        |
| tr R6C5Q7 R6C5Q7_9FIRM         | HKN.Y..EGME  | LIRPMYMKER    | EDILRWVAHN..DLH  | FTRC     | ACRETE  | SYENLE             |        |
| tr R5WT82 R5WT82_9FIRM         | HSTN.F..EGME | LIRPMYLIRER   | EDIHWNYN..GLR    | FTRC     | ACRETE  | QCADEE.T           |        |
| tr A0A1Q6RFH7 A0A1Q6RFH7_9FIRM | RSKN.F..PGME | LIRPLYCVHER   | EDAIWKNYN..HLQ   | FTQC     | ACRETE  | EREAA              |        |
| tr W0U949 W0U949_9FIRM         | HSTN.Y..AGME | LIRPLYMVKER   | EDIRWVEQN..DLH   | FTRC     | ACRETE  | SYEGLE             |        |
| tr A0A143Y538 A0A143Y538_9LACT | PSKN.Y..EGME | LIRPLYKVKER   | EDIITWKDYN..ELA  | FTQC     | ACCET   | ENCAILNN           |        |
| tr A0A1I5VEX7 A0A1I5VEX7_9FIRM | HKN.F..PDME  | LVRLPLYCVHER  | EDIIDWKNYN..HLR  | FTQC     | ACRETE  | SRDAI              |        |
| tr A0A1K1PC37 A0A1K1PC37_9FIRM | HSEH.F..EGME | LIRPLYMVER    | EDDIHWCERN..GLE  | FTQC     | ACRETE  | SVHMSGD            |        |
| tr A0A1G5I8B0 A0A1G5I8B0_9FIRM | HSTN.F..EGME | LIRPMYLVVER   | ESDIKAWRDYN..DLH | FTQC     | ACHFT   | TECTCTCRE          |        |
| tr A0A2W7JTA9 A0A2W7JTA9_9BACT | RQN.F..DGME  | LIRPMYCIHEDDI | VNWTKYN..GLE     | FTQC     | ACRM    | TSRTAEQEACAID      | N      |
| tr A0A1G9E946 A0A1G9E946_9CLOT | RSTN.F..EGME | LIRPMYLVVER   | EDIKWRDDN..GLR   | FTQC     | ACRETE  | MLEKEKGF           |        |
| tr A0A2M9A852 A0A2M9A852_9BACT | RQN.Y..PGMT  | LIRPLYKIHEDDI | IAWSRAN..NLN     | FTQC     | ACRETE  | KNFEN              |        |
| tr E6UAU2 E6UAU2_RUMA7         | HSTN.Y..EGMQ | LIRPMYVVER    | EDIIRWKQYN..DLQ  | FTQC     | ACRETE  | ENCTMCDN           |        |
| tr G5HHM3 G5HHM3_9FIRM         | HSTN.F..EGME | LIRPLYVVKER   | EDIILAWRSCN..GLH | FTQC     | ACRETE  | QIAREQAAGMD        | G      |
| tr A0A1D3TNX5 A0A1D3TNX5_9FIRM | HSTN.F..KGME | LIRPLYLVKER   | EDIITWKNYH..GLK  | FTQC     | ACRETE  | MTSQEHA            |        |
| tr A0A2P6URX3 A0A2P6URX3_9BACT | HQN.F..PGMT  | LIRPLYKIHEDDI | IAWMRAN..ELQ     | FTQC     | ACRETE  | RNAVS              |        |
| tr A0A1M6RMG6 A0A1M6RMG6_9BACT | HQN.F..AGMT  | LIRPMYCIHEDDI | VAKWKN..RLE      | FTQC     | ACHFT   | ESIAYS             |        |
| tr A0A1C6IZU3 A0A1C6IZU3_9FIRM | RSRN.F..PGME | LIRPLYCVHER   | EDAIWKNYN..GLR   | FTQC     | ACRETE  | ERDGA              |        |
| tr R9LUH7 R9LUH7_9FIRM         | HKN.F..PGME  | LIRPLYCVHER   | EDAVTAWKNYN..QLR | FTQC     | ACRETE  | ARDAS              |        |
| tr J1H3X4 J1H3X4_9CLOT         | PSTN.F..PGME | IIRPLYLVVER   | ERDVLAWKRYN..SLE | FVRC     | GCPL    | SENAPVCTE          |        |
| tr A0A176U8C8 A0A176U8C8_9FIRM | HSTN.F..EGME | LIRPMYCIHEDDI | IWKRYN..ELE      | FTQC     | ACRETE  | NCTMC              |        |
| tr A0A1Q6KUQ8 A0A1Q6KUQ8_9FIRM | HSTN.F..EGME | LIRPMYCIHEDDI | IWMNYN..GLE      | FTQC     | ACRETE  | NYTLN              |        |
| tr R5ALL4 R5ALL4_9CLOT         | HKN.F..PGMS  | LIRPMYCIHEDDI | VAKVQN..GLR      | FTQC     | ACRETE  | QCEGD              |        |
| tr A0A1Y4RIL6 A0A1Y4RIL6_9FIRM | HSTN.F..PGME | LIRPLYVVER    | EDIILAWKDYN..GLR | FTQC     | ACRETE  | QIAKERAAGDA        | A      |
| tr E9SA84 E9SA84_RUMAL         | HSTN.F..EGMQ | LIRPLYMVER    | EDIKWCERN..GLE   | FTQC     | ACRETE  | EREVYDD            |        |
| tr R7IB10 R7IB10_9FIRM         | RSRN.F..PGME | LIRPMYCIHEDDI | CAWRDFN..ALH     | FIAC     | ACRL    | TEERDKS            |        |
| tr A0A2A7B516 A0A2A7B516_9FIRM | HSTN.F..PGMT | LIRPMYCIHEDDI | IAWRRYN..ELE     | FTQC     | ACRETE  | NCTMC              |        |
| tr A0A1Q6SWI6 A0A1Q6SWI6_9FIRM | HSTN.F..PGMT | LIRPMYCIHEDDI | IAWRRYN..ELE     | FTQC     | ACRETE  | NCTMC              |        |
| tr R6ZNC4 R6ZNC4_9CLOT         | HSTN.F..EGME | LIRPLYLVKER   | EDIIAWRDFN..NLR  | FTQC     | ACRETE  | AI..SRE            |        |
| tr COCTY6 COCTY6_9FIRM         | HSTN.F..PGME | LIRPLYLVKER   | EDIILDKDYN..GLH  | FTQC     | ACRETE  | QIARDMEARGAA       | K      |
| tr E2NTX2 E2NTX2_CATMR         | HKN.F..KGME  | LIRPMYLVVER   | EDIIAWAEKF..NLK  | FTQC     | ACRETE  | SEARG              |        |
| tr A0A212JBS4 A0A212JBS4_9FIRM | HKN.F..EGME  | LIRPMYCIHEDDI | IAWKRYN..DLE     | FTQC     | ACRETE  | NCTMC              |        |
| tr A0A1C5XK44 A0A1C5XK44_9CLOT | HKN.F..EGME  | LIRPMYCIHEDDI | LDWKRYN..NLQ     | FTQC     | ACRETE  | NCAIC              |        |
| tr A0A1M2Z8D3 A0A1M2Z8D3_9FIRM | HSTN.F..PGME | LIRPMYCIHEDDI | IRKNYN..ELS      | FTQC     | ACRETE  | NCTMC              |        |
| tr A0A1H2SZG7 A0A1H2SZG7_9FIRM | HSDH.Y..DGL  | VIRPLFKVER    | EDAIINWRAN..DLT  | FTNC     | ACRETE  | EGCSL..I           |        |
| tr A9KRA1 A9KRA1_LACP7         | HSTN.F..EGME | LIRPMYVVKER   | EDAILHWKQFH..ELQ | FTQC     | ACRETE  | NCTLCDN            |        |
| tr A0A2J8B726 A0A2J8B726_9FIRM | HQN.F..PGME  | LIRPLYLVVER   | EDILAWCSYH..QLD  | FTRC     | ACRETE  | QSEAE              |        |
| tr A0A252CN16 A0A252CN16_9FIRM | RSRN.F..AGME | LIRPLYLVVER   | EDIIAWKDYN..QLT  | FTQC     | ACRETE  | MYADQPS            |        |
| tr A0A1I5J0S5 A0A1I5J0S5_9FIRM | HSTN.Y..KGME | LIRPLYMVKER   | EDIIAWKRYN..NLQ  | FTQC     | ACRETE  | NCTVLDGN           |        |
| tr A0A2N3RZR2 A0A2N3RZR2_9BACT | RQN.F..EGME  | LIRPMYCIHEDDI | IAWRRYN..ELE     | FTQC     | ACRL    | TLNTAVN            |        |
| tr R9IVG3 R9IVG3_9FIRM         | HSTN.F..PGME | LIRPMYVVER    | EDIKWRDYN..GLQ   | FTQC     | ACRETE  | CAAVND             |        |
| tr EORWJ2 EORWJ2_BUTPB         | HSTN.F..KGME | LIRPLYLVVER   | EDIVHWMNYN..ELK  | FTRC     | ACKL    | TEQLEKEGNL         |        |
| tr A0A1M6RWL0 A0A1M6RWL0_9BACT | SLN.F..GME   | LIRPMYCIHEDDI | INWKRYN..GLQ     | FTQC     | ACRETE  | ESC                | D      |
| tr A0A2U1BER2 A0A2U1BER2_9FIRM | HSTN.F..AGME | LIRPLYCIHEDDI | IAWKQYN..NLE     | FTQC     | ACRETE  | NCTMC              |        |
| tr A0A1Y4IPQ2 A0A1Y4IPQ2_9FIRM | HSTN.F..EGME | LIRPMYLVVER   | EDAILDWARCH..DLH | FTQC     | ACRETE  | EAYEVD             |        |
| tr A0A2P8EHL9 A0A2P8EHL9_9FUSO | HKN.F..PGME  | LIRPMYCIHEDDI | IAWRRYN..QLE     | FTQC     | ACRETE  | SCEAQ              |        |
| tr A0A2V2F820 A0A2V2F820_9FIRM | HSTN.F..AGME | LIRPLYCVHER   | EDIIAWKRYN..ELE  | FTQC     | ACRETE  | NCTMC              |        |
| tr R7FQ76 R7FQ76_9CLOT         | KSTS.F..GGME | LIRPMYLVVER   | EDIINWKKN..GLQ   | FTQC     | ACRETE  | NCAICDN            |        |
| tr A0A1F2PGJ4 A0A1F2PGJ4_9FIRM | KSN.F..ENME  | LIRPMYLIRER   | EDIISWKLHN..DLQ  | FTQC     | ACRETE  | NCTMIS.D           |        |





|                                 |                                                                     |
|---------------------------------|---------------------------------------------------------------------|
| tr D5HJ18 D5HJ18_9FIRM          | HS TN.F..EGME LIRPLYMVR EDDI KAWRDYN..ELHFIQ ..ACKF TDTCTTCN..      |
| tr A0A1C5QB90 A0A1C5QB90_9FIRM  | HS QH.F..EGME LIRPLYLVH EDAI KSWRDYN..GLHFIQ ..ACRF TENCVSCGG..     |
| tr A0A1H9TDF0 A0A1H9TDF0_9FIRM  | HS TN.F..EGLE LIRPLYLVRE EDDI IKWREYN..ELYFIQ ..ACRF TDETTSSLMGN..  |
| tr A0A1C5SKP23 A0A1C5KP23_9CLOT | HS QN.F..EGME LIRPLYLVKE EDAI KAWRDSN..DLHFIQ ..ACRF TENCTSCGG..    |
| tr R5C7F1 R5C7F1_9FIRM          | K TN.F..DGME LIRPLYFIR EDDI KAWRDEN..HLHFIQ ..ACRF TDTCTTCAVTPESS.. |
| tr R6LWZ2 R6LWZ2_9FIRM          | HS TN.F..EGME LIRPLYLVRE EDDI KAWRDAN..DLHFIQ ..ACRF TDTCTTCR..     |
| tr R5R1U1 R5R1U1_9FIRM          | HS TN.F..EGME LIRPLYLVIR EDDI KAWRDYN..DLHFIQ ..ACRF TDTCTTCNN..    |
| tr C9KJ69 C9KJ69_9FIRM          | K TS.C..PGME LIRPLYYIH EDAI KWRDDN..GLYFIQ ..ACRF TETCSTCH..        |
| tr R6WDB5 R6WDB5_9FIRM          | HS SN.F..EGME LIRPLYLVIR EDDI KAWRDAN..GLHFIQ ..ACRF TDTCCSSCDK..   |
| tr R7BJZ6 R7BJZ6_9FIRM          | HS TN.F..EGME LIRPLYLVIR EDDI KAWRDAN..ELKFIQ ..ACRF TDTCCSSCAE..   |
| tr A0A2S6HN32 A0A2S6HN32_9BACE  | HS TN.F..EGME LIRPLYLVIR EDDI KWRDYN..DLHFIQ ..ACRF TDTCTTCR..      |
| tr A0A1H5UR13 A0A1H5UR13_9FIRM  | HS TN.F..PGME LIRPMYLR EADV KWRDYN..KLHFIQ ..ACRF TEISKNOQE..       |
| tr B5CL75 B5CL75_9FIRM          | HS TN.F..EGME LIRPLYLVRE EDAI KAWRDYN..DLHFIQ ..ACRF TDTCTTCNN..    |
| tr A0A1Q9JUJ6 A0A1Q9JUJ6_9FIRM  | HS TN.F..EGME LIRPLYLVIR EDDI KWRDYN..NLHFIQ ..ACRF TDTCTTCR..      |
| tr A0A1I6X423 A0A1I6X423_9FIRM  | HS TN.F..EGME LIRPMYLR EDDI KWRDAN..GLHFIQ ..ACRF TDTCSAIDP..       |
| tr R7R0R4 R7R0R4_9FIRM          | HS TN.F..EGME LIRPMYLR EDDI KWRDYN..GLHFIQ ..ACRF TDTCTTCN..        |
| tr A0A1T4PUK5 A0A1T4PUK5_9FIRM  | RS TN.F..SGME LIRPMYLR ESDV KWRDYN..DLKFIQ ..ACRF TEKSSAREE..       |
| tr A0A174N7L5 A0A174N7L5_9FIRM  | HS QN.F..EGME LIRPMYLR ESA KAWRDTN..GLHFIQ ..ACRF TENCVSCGG..       |
| tr A0A1C5VPX6 A0A1C5VPX6_9FIRM  | HS QN.F..EGME LIRPMYLR ESGI KAWRDYN..KLQFIQ ..ACRF TENCSTCGG..      |
| tr U2EG64 U2EG64_9FIRM          | HS TN.F..EGMQ LIRPMYLR EADI KWRDYN..DLHFIQ ..ACRF TDTCTTCR..        |
| tr A0A1T4LYU6 A0A1T4LYU6_9FIRM  | K TN.F..EGME LIRPMYLR ESDI KWRDYN..KLHFIQ ..ACRF TETCTTIQTD..       |
| tr C2KWR4 C2KWR4_9FIRM          | HS TN.F..EGME LIRPLYVVR EKDI HWRNYN..QLNFIQ ..ACRF TETCTSTCQ..      |
| tr A0A1Q6S6R3 A0A1Q6S6R3_9FIRM  | HS TN.F..EGME LIRPLYLVRE EDDI KWRDYN..DLHFIQ ..ACRF TDTCTTCR..      |
| tr A0A1M6E180 A0A1M6E180_9FIRM  | HS TN.F..EGME LIRPMYLR EDDI KWRDYN..SLHFIQ ..ACRF TDTCSVDG..        |
| tr A0A2N5P2N9 A0A2N5P2N9_RUMGN  | HS TN.F..EGME LIRPLYLVRE EDDI KWRDYN..HLHFIQ ..ACRF TETCTSTCS..     |
| tr R6YU83 R6YU83_9FIRM          | NS SN.F..AGME LIRPLYLVKE EDAI KAWRDYN..DLHFIQ ..ACRF TEHCATCGG..    |
| tr A0A1C6GY75 A0A1C6GY75_9FIRM  | HS TN.F..EGME LIRPLYLVIR EDDI KAWRDYN..DLRFIQ ..ACRF TDTCTTCN..     |
| tr D2RKU5 D2RKU5_ACIFV          | K TS.C..PGME LIRPLYVVR EDDI KSWRDN..GLYFIQ ..ACRF TETCTSTCH..       |
| tr A0A1I0BL00 A0A1I0BL00_9FIRM  | HS TN.F..EGME LIRPLYLVRO DDI AWQRYN..GLHFIQ ..ACRF TETCDSCSV..      |
| tr B0G358 B0G358_9FIRM          | HS TN.F..EGME LIRPMYLR EADI GWRDYN..QLNFIQ ..ACRF TENCATCGG..       |
| tr A0A1H9G440 A0A1H9G440_9FIRM  | HA TN.F..EGME LIRPLYLVIR EDDI KWRDYN..GLHFIQ ..ACRF TESCASCGET..    |
| tr D4RZP6 D4RZP6_9FIRM          | HS TN.F..EGME LIRPMYLR EDDI HWRDFN..NLHFIQ ..ACRF TDTCCSSCR..       |
| tr R7AKW6 R7AKW6_9CLOT          | HS QN.F..EGME LIRPMYLR EADV KAWRDYN..GLQFIQ ..ACRF TENCVSCGG..      |
| tr R6M6V2 R6M6V2_9CLOT          | HS QN.F..EGME LIRPMYLR EDDI KWRDYN..NLHFIQ ..ACRF TDTCTTCR..        |
| tr A0A1D3TT13 A0A1D3TT13_9FIRM  | HS TN.F..EGME LIRPMYLR EDDI KWRDYN..NLHFIQ ..ACRF TDTCTTCR..        |
| tr R5UY37 R5UY37_9FIRM          | HA AN.F..PGMQ LIRPMYLR EADI KWC SYH..NLRFIQ ..ACRF TDTCTTCNP..      |
| tr EORVN7 EORVN7_BUTPB          | HS TN.F..EGME LIRPLYLVRE EDDI KWRDYN..NLTFIN ..ACRF TESCASCGET..    |
| tr A0A1I5XQ88 A0A1I5XQ88_9FIRM  | HS TN.F..EGME LIRPLYLVIR EDDI KWMAYN..DLTFIN ..ACRF TESCASCGET..    |
| tr A0A1H3X4G1 A0A1H3X4G1_9FIRM  | HS TN.F..EDMQ LIRPMYLR ESDI KWRDYN..NLHFIQ ..ACRF TDTCTTCAVLPE..    |
| tr A0A1Q9K6P3 A0A1Q9K6P3_9FIRM  | HS RN.F..EGME LIRPMYLR EADI KAWRDYN..KLHFIQ ..ACRF TENCASCGG..      |
| tr U2U9W4 U2U9W4_9FIRM          | RS TN.F..EGME LIRPLYLVIR EDDI LWRDEN..HLNFIQ ..ACRF TESCSCSSQ..     |
| tr R6NFY6 R6NFY6_9FIRM          | HS TN.F..EGME LIRPMYLR EDDI KWRDYN..DLHFIQ ..ACRF TDTCTTCR..        |
| tr A0A1H3ZB04 A0A1H3ZB04_9FIRM  | HS TN.F..EGME LIRPLYLVRE EDDI KAWRDDN..DLHFIQ ..ACRF THTCSLEGK..    |
| tr A0A1C5LN34 A0A1C5LN34_9FIRM  | HS TN.F..EGME LIRPMYLR EDDI KWRDYN..DLHFIQ ..ACRF TDTCTTCR..        |
| tr A7VHD7 A7VHD7_9CLOT          | HS TN.F..EGME LIRPLYLVRE EDDI KAWRDYN..GLHFIQ ..ACRF TDTCTTCNN..    |
| tr A0A1H2XL03 A0A1H2XL03_9FIRM  | HS SN.F..EGME LIRPLYLVIR EDDI KWRDYN..GLHFIQ ..ACRF TDTCSAVDP..     |
| tr R6URH0 R6URH0_9CLOT          | HS TN.Y..EGME LIRPLYLVRE EDDI KWRDYN..KLSFIQ ..ACRF TDTCSVDG..      |
| tr R7IV15 R7IV15_9FIRM          | HS TN.F..EGME LIRPLYLVRE EDDI KWRDYN..NLGFIQ ..ACRF TDTCTTCNS..     |
| tr A6BDB1 A6BDB1_9FIRM          | HS QN.F..EGME LIRPMYLR EDDI IWRDYN..QLNFIQ ..ACRF TENCVSCGG..       |
| tr A0A239RF45 A0A239RF45_9FIRM  | HS TN.F..EGME LIRPLYLVRE ESDI CAWRDYN..ELHFIQ ..ACRF TETCTTCHE..    |
| tr A0A1I4FSK7 A0A1I4FSK7_9FIRM  | HS TN.F..EGME LIRPLYLVIR ESDI CAWRDYN..DLHFIQ ..ACRF TDTCTTCHE..    |
| tr A0A2N0UJ41 A0A2N0UJ41_9FIRM  | HS TN.Y..EGME LIRPLYLVRE AEI KWRDYN..KLNFIQ ..ACRF TDTCTTCSP..      |
| tr A5ZUM5 A5ZUM5_9FIRM          | HS TN.F..EGME LIRPLYLVIR EADI HWANYN..DLHFIQ ..ACRF TEHCASCGET..    |
| tr A0A1Q9J6X5 A0A1Q9J6X5_9FIRM  | HS TN.F..EGME LIRPLYLVRE EDDI KWRDYN..ELHFIQ ..ACRF TETCSCSS..      |
| tr R6QH64 R6QH64_9FIRM          | HS QN.F..DGME LIRPLYMVK EDDI KAWRDYN..KLHFIQ ..ACRF TENCATCGG..     |
| tr A0A255IAE4 A0A255IAE4_9FIRM  | HS TN.F..EGME LIRPMYLR EDDI KWRDYN..DLYFIQ ..ACRF TDTCTTCR..        |
| tr R5D646 R5D646_9FIRM          | HS TN.F..EGME LIRPLYLVRE EDDI KAWRDYN..DLHFIQ ..ACRF TDTCTTCNN..    |
| tr A0A1C5SCE2 A0A1C5SCE2_9CLOT  | HS KN.F..EGME LIRPMYKIK EDDI KAWRDYH..KLHFIQ ..ACRF TENCATCGG..     |
| tr G9WU95 G9WU95_9FIRM          | HS TN.F..PGME LIRPLYVVR EDDI KWRDYN..QLNFIQ ..ACRF TETCSTCH..       |
| tr D4J5M7 D4J5M7_9FIRM          | HS SN.F..EGME LIRPMYLR EDDI KWRDLN..GLHFIQ ..ACRF TDTCCSSCR..       |
| tr A0A1M7SFL4 A0A1M7SFL4_9FIRM  | HS TN.F..EGME LIRPLYLVRE ESDI CAWRDYN..NLHFIQ ..ACRF TETCTTCHE..    |
| tr A0A1C5PQ80 A0A1C5PQ80_9CLOT  | HS TN.F..EGME LIRPLYLVRE ESDI KAWRDYN..NLHFIQ ..ACRF TDTCTTCNN..    |
| tr A0A1T4MVX1 A0A1T4MVX1_9FIRM  | HS TN.F..EGME LIRPMYLR EDDI KWRDYN..NLHFIQ ..ACRF TEECASDDF..       |
| tr R5JHV4 R5JHV4_9FIRM          | HA AN.F..EGME LIRPMYLR EDDI KWRDYN..NLHFIQ ..ACRF TDTCCSSCR..       |
| tr A0A0U5NQ66 A0A0U5NQ66_9CLOT  | HS KN.F..EGME LIRPLYMVK EDDI KAWRDYN..KLHFIQ ..ACRF TEHCSCVCGG..    |
| tr R7BIC3 R7BIC3_9FIRM          | HS TN.F..EGMQ LIRPMYLR EKDI KWRDYN..DLHFIQ ..ACRF TDTCTTCNP..       |
| tr R5EBZ7 R5EBZ7_9CLOT          | HS TN.F..EGME LIRPMYLR EDDI KWRDYN..KLHFIQ ..ACRF TESCASCGET..      |
| tr A0A1G5AAM6 A0A1G5AAM6_9FIRM  | HS TN.F..EGME LIRPMYLR ESDI CAWRDYN..ELHFIQ ..ACRF TETCSTCHT..      |
| tr A0A1C5QDL9 A0A1C5QDL9_9CLOT  | HS TN.F..EGME LIRPLYLVIR EDDI KSWRDYN..DLHFIQ ..ACRF TDTCTTCNN..    |
| tr A0A1Q9JZU8 A0A1Q9JZU8_9FIRM  | HS TN.F..EGME LIRPMYLR EDDI KWRDYN..DLHFIQ ..ACRF TDTCTTCQ..        |
| tr WOFHG5 WOFHG5_9BACT          | RS SN.F..EGME LIRPMYLR EKDI CAWRDN..DLVFIQ ..ACRF TDTCTTCHE..       |
| tr A0A1T4V7R0 A0A1T4V7R0_9FIRM  | HS TN.F..EGME LIRPLYLVRE ESDI CAWRDYN..ELHFIQ ..ACRF TDTCTTCHE..    |
| tr U2LSI7 U2LSI7_9FIRM          | HA AN.F..EGMQ LIRPMYLR EADI KWCYH..DLQFIQ ..ACRF TDTCTTCDP..        |
| tr R7C751 R7C751_9CLOT          | HS TN.F..EGME LIRPLYLVRE EDDI KAWRDYN..DLKFIQ ..ACRF TDTCTTCNN..    |
| tr A0A1H5X7G0 A0A1H5X7G0_9FIRM  | HS TN.F..EGME LIRPLYLVIR EKDI CSWRDYN..DLHFIQ ..ACRF TDTCTTCNV..    |
| tr R5NVSO R5NVSO_9CLOT          | HS TN.F..EGME LIRPLYLVRE EDDI KAWRDAN..HLHFIQ ..ACRF TDTCCSSCDK..   |
| tr A0A1G6A4R8 A0A1G6A4R8_EUBOX  | HS TN.F..EGME LIRPLYLVRE EADI KWRDYN..ELRFIQ ..ACRF TETCTTCNV..     |
| tr A0A1G5YAI2 A0A1G5YAI2_9FIRM  | HS TN.F..EGME LIRPLYLVRE EADI CAWRDYN..NLHFIQ ..ACRF TDTCTTCHE..    |
| tr R6ED63 R6ED63_9CLOT          | HS SN.F..EGME LIRPLYLVIR EDDI KWRDYN..DLHFIQ ..ACRF TDTCTTCR..      |
| tr A0A1I4A1G1 A0A1I4A1G1_9FIRM  | K TN.H..EGME LIRPLYLVRE EDDI KAWRDSN..KLYFIQ ..ACRF TEACAECEG..     |
| tr A0A1C5WQ42 A0A1C5WQ42_9FIRM  | HS IH.F..EGME LIRPLYLVIR EDDI KWRDYN..SLHFIQ ..ACRF TDTCTTCR..      |
| tr A0A0J1GF21 A0A0J1GF21_9FIRM  | HA AN.F..EGME LIRPLYLVKE AAI KAWRDTN..DLHFIQ ..ACRF TENCASC GG..    |
| tr B7CBL3 B7CBL3_9FIRM          | HS NN.F..KGME VIRPLYLH EDDI KAWAKHN..DLYFIQ ..ACRF TQACANETC..      |
| tr R5ZIH2 R5ZIH2_9FIRM          | HS NH.F..ERME VIRPLYLH EDDI KAWAKFN..DLYFIQ ..ACRF TDTCCSSEAC..     |
| tr A0A2Y9B607 A0A2Y9B607_RUMFL  | HS TN.F..EGME LIRPLYLVRE EDDI KWRDYN..GLHFIQ ..ACRF TDTCTTCAP..     |
| tr B0MNV3 B0MNV3_9FIRM          | HS TN.F..EGME LIRPLYLVRE EDDI KAWRDYN..GLHFIQ ..ACRF TDTCTTCN..     |
| tr D4JJE1 D4JJE1_9FIRM          | HS TN.F..EGME LIRPLYLVRE EDDI KAWRDYN..GLHFIQ ..ACRF TDTCTTCNN..    |
| tr A0A173SBL1 A0A173SBL1_9FIRM  | HS TN.F..EGME LIRPMYLR EDDI KAWRDYN..DLHFIQ ..ACRF TDTCTTCNN..      |
| tr R5GI28 R5GI28_9FIRM          | HA AN.F..PGMQ LIRPMYLR EDDI KHWAKYN..DLHFIQ ..ACRF TDTCTTCNP..      |
| tr R5NQZ4 R5NQZ4_9FIRM          | HS TN.F..EGME LIRPLYLVRE EDDI KAWRDYN..NLHFIQ ..ACRF TDTCTTCNN..    |
| tr A0A1C6BHH6 A0A1C6BHH6_9FIRM  | HS DH.F..EGMQ LIRPMYLR EEDI KWCYH..DLHFIQ ..ACRF TDTCTTCDP..        |
| tr R6NBF8 R6NBF8_9FIRM          | HS TN.Y..EGME LIRPLYLVRE EDDI KWCYH..DLHFIQ ..ACRF TDTCTTCNN..      |
| tr A5Z569 A5Z569_9FIRM          | HS TN.F..EGME LIRPLYLVRE EDDI KAWRDYN..DLHFIQ ..ACRF TDTCTTCNN..    |
| tr R6I848 R6I848_9FIRM          | HS TN.Y..PGME LIRPLYLVRE EDDI KAWRDYN..GLHFIQ ..ACRF TDTCTTCNN..    |
| tr R5VV47 R5VV47_9CLOT          | HS TN.F..EGME LIRPLYLVRE EDDI KAWRDYN..HLHFIQ ..ACRF TDTCTTCNN..    |
| tr R7HSQ4 R7HSQ4_9CLOT          | HS TN.F..EGME LIRPLYLVRE EDDI MAWRDYN..GLHFIQ ..ACRF TDTCTTCN..     |
| tr R5SK03 R5SK03_9CLOT          | HS TN.F..EGME LIRPLYLVRE EDDI KAWRDYN..DLHFIQ ..ACRF TDTCTTCNN..    |
| tr R7N692 R7N692_9FIRM          | HS TN.F..EGME LIRPLYLVIR EDDI KAWRDYN..GLHFIQ ..ACRF TDTCTTCNN..    |
| tr R5IGR7 R5IGR7_9CLOT          | HS TN.F..EGME LIRPLYLVRE EDDI KAWRDYN..HLHFIQ ..ACRF TDTCTTCN..     |
| tr A0A1Q6MMQ0 A0A1Q6MMQ0_9FIRM  | HS TN.F..EGME LIRPLYLVRE EDDI KAWRDYN..GLNFIQ ..ACRF TDTCTTCNN..    |
| tr A0A1Q6RMI1 A0A1Q6RMI1_9FIRM  | K TN.F..EGMQ LIRPLYLVIR EDDI KAWRDAY..DLHFIQ ..ACRF TDTCTTCRP..     |
| tr A0A1H7N3B2 A0A1H7N3B2_RUMFL  | HS TN.F..EGME LIRPLYLVRE EADI KWRDYN..DLYFIQ ..ACRF TENCSCSCE..     |
| tr A0A1Q6J739 A0A1Q6J739_9FIRM  | HS TN.F..EGME LIRPMYLR EADI KWRDFN..DLHFIQ ..ACRF TDTCTSCNP..       |

tr|R5KSL8|R5KSL8\_9FIRM  
tr|W0U2V4|W0U2V4\_9FIRM  
tr|A0A11IAHH3|A0A11IAHH3\_9FIRM  
tr|A0A132NXP9|A0A132NXP9\_GIATN  
tr|A0A146K8R2|A0A146K8R2\_9EUKA  
tr|B1R6Y8|B1R6Y8\_CLOPF  
tr|A0A1M6D282|A0A1M6D282\_9CLOT  
tr|A0A173YDX8|A0A173YDX8\_CLOVE  
tr|A0A1G5RQX6|A0A1G5RQX6\_9FIRM  
tr|D8GMF1|D8GMF1\_CLOLD  
tr|A0A134AAP6|A0A134AAP6\_9FIRM  
tr|A0A210N1A5|A0A210N1A5\_9CLOT  
tr|A0A1S1VCE7|A0A1S1VCE7\_9FIRM  
tr|W8U9H6|W8U9H6\_PEPAC  
tr|A0A1I4WPJ0|A0A1I4WPJ0\_9FIRM  
tr|ASN1X3|ASN1X3\_CLOK5  
tr|A0A1M6J810|A0A1M6J810\_9FIRM  
tr|A0A2T0BP99|A0A2T0BP99\_9CLOT  
tr|A0A1I5A132|A0A1I5A132\_9CLOT  
tr|A0A0X8JSV6|A0A0X8JSV6\_9FUSO  
tr|A0A101WQZ2|A0A101WQZ2\_9FIRM  
tr|K0B3S7|K0B3S7\_CLOA9  
tr|A0A0P8VR55|A0A0P8VR55\_9CLOT  
tr|A0A069R172|A0A069R172\_PEPLE  
tr|A0A1M6GRY4|A0A1M6GRY4\_9CLOT  
tr|A0A095XSV5|A0A095XSV5\_9FIRM  
tr|A0A1V4SXM9|A0A1V4SXM9\_9CLOT  
tr|D0GJU2|D0GJU2\_9FUSO  
tr|A0A1U7M2L2|A0A1U7M2L2\_TISCR  
tr|A0A099RUP9|A0A099RUP9\_9CLOT  
tr|A0A0L0W9M4|A0A0L0W9M4\_CLOPU  
tr|A0A1F8TXJ0|A0A1F8TXJ0\_9FIRM  
tr|U2SSC1|U2SSC1\_9FUSO  
tr|A0A1G4FP35|A0A1G4FP35\_9FIRM  
tr|U4KQE2|U4KQE2\_9MOLU  
tr|V7I162|V7I162\_9CLOT  
tr|A0A1H3AQW8|A0A1H3AQW8\_9FIRM  
tr|F9VJ52|F9VJ52\_ARTSS  
tr|A0A084J8N3|A0A084J8N3\_9CLOT  
tr|A0A1T4XT21|A0A1T4XT21\_9CLOT  
tr|A0A1M6CD68|A0A1M6CD68\_9CLOT  
tr|E3PXH3|E3PXH3\_ACESD  
tr|A0A1D8GNY9|A0A1D8GNY9\_9CLOT  
tr|L1QHD2|L1QHD2\_9CLOT  
tr|A0A0E3JQG2|A0A0E3JQG2\_CLOSL  
tr|A0A2N1PGX0|A0A2N1PGX0\_9BACT  
tr|D9SL09|D9SL09\_CLOC7  
tr|A0A239JSI7|A0A239JSI7\_9FIRM  
tr|A0A2N2EED3|A0A2N2EED3\_9FIRM  
tr|A0A2N2B2N9|A0A2N2B2N9\_9FIRM  
tr|A0A1M6R9N3|A0A1M6R9N3\_9CLOT  
tr|A0A1I3QLZ5|A0A1I3QLZ5\_9FIRM  
tr|A0A1V1HZ83|A0A1V1HZ83\_9FIRM  
tr|A0A0R3JYX8|A0A0R3JYX8\_9CLOT  
tr|A0A1M4T9L7|A0A1M4T9L7\_9FIRM  
tr|A0A1C6BDC9|A0A1C6BDC9\_9CLOT  
tr|R7RQE1|R7RQE1\_9CLOT  
tr|A0A1I2P6D5|A0A1I2P6D5\_9CLOT  
tr|A0A1V4IHV8|A0A1V4IHV8\_9CLOT  
tr|A0A1M5UPJ6|A0A1M5UPJ6\_9CLOT  
tr|A0A1M4VWP2|A0A1M4VWP2\_9CLOT  
tr|M1Z6M0|M1Z6M0\_9FIRM  
tr|A0A0P8YVR7|A0A0P8YVR7\_9CLOT  
tr|A0A1I7IFT5|A0A1I7IFT5\_9CLOT  
tr|A0A1V4IEB9|A0A1V4IEB9\_9CLOT  
tr|A0A1S8TRH4|A0A1S8TRH4\_9CLOT  
tr|A0A0L6ZAD3|A0A0L6ZAD3\_9CLOT  
tr|A0A150FSS8|A0A150FSS8\_CLOPD  
tr|A0A2I4P454|A0A2I4P454\_CLOBO  
tr|A0A1T4W6M5|A0A1T4W6M5\_9CLOT  
tr|A0A1W1XPH3|A0A1W1XPH3\_9CLOT  
tr|A0A0C1U2P7|A0A0C1U2P7\_9CLOT  
tr|A0A1G9ECK5|A0A1G9ECK5\_9CLOT  
tr|A0A1I0GJZ8|A0A1I0GJZ8\_9CLOT  
tr|A0A1D7XIC3|A0A1D7XIC3\_9CLOT  
tr|A0A0F2Q1L1|A0A0F2Q1L1\_9CLOT  
tr|A0A162RNT1|A0A162RNT1\_9CLOT  
tr|S6E1Y1|S6E1Y1\_9CLOT  
tr|A0A0D8I8A0|A0A0D8I8A0\_9CLOT  
tr|A0A151AMM3|A0A151AMM3\_9CLOT  
tr|A0A1H0UQL6|A0A1H0UQL6\_9CLOT  
tr|A0A1B7LLD6|A0A1B7LLD6\_9CLOT  
tr|A0A140L2D9|A0A140L2D9\_9CLOT  
tr|A0A0A7FRU7|A0A0A7FRU7\_9CLOT  
tr|A0A2T0BG26|A0A2T0BG26\_9CLOT  
tr|U2N7Z7|U2N7Z7\_9CLOT  
tr|A0A2K8ZY64|A0A2K8ZY64\_9BACT  
tr|TON2J9|TON2J9\_9CLOT  
tr|A0A1M6AYT1|A0A1M6AYT1\_9CLOT  
tr|A0A1M5X3U6|A0A1M5X3U6\_9CLOT  
tr|A0A1I0YYI8|A0A1I0YYI8\_9CLOT  
tr|W6N6U7|W6N6U7\_CLOTY  
tr|A0A1D9N7E7|A0A1D9N7E7\_CLOPA  
tr|A0A2N1Q5S0|A0A2N1Q5S0\_9BACT  
tr|A0A1T4KM79|A0A1T4KM79\_9FIRM  
tr|A0A1G5F6L0|A0A1G5F6L0\_9CLOT  
tr|A0A1Q3RQW6|A0A1Q3RQW6\_9FIRM  
tr|A0A2N2CCK9|A0A2N2CCK9\_9FIRM  
tr|A0A1I1RFS0|A0A1I1RFS0\_9CLOT  
tr|R5XF55|R5XF55\_9CLOT  
tr|A0A1G3W898|A0A1G3W898\_9BACT  
tr|A0A2S6FY49|A0A2S6FY49\_9CLOT  
tr|A0A2N1QD19|A0A2N1QD19\_9BACT

HS|TN.F..EGME|LIRPLYLVR|EDDI|KAWRDYN..DLHF|IQ|C|...ACKF|TDTCTTCNN.  
NSTN.F..EGMQ|LIRPLYMVR|EDDI|KAWRDYN..GLRF|IQ|C|...ACKF|TDTCTTCAP.  
NSTN.F..EGME|LIRPLYYIR|EDDI|IDFRDYN..GLNF|IQ|C|...ACHT|TETCTCHT.  
HNA..E..KNIT|LIRPMVFC|EEDT|IAYARHS..TF|PIVTC|...N.CPHEG.N..  
EAK..E..GKIT|LIRPLILTF|EQO|IKDFASIT..KF|PIVTC|...N.CPFEED.D..  
KAAN.F..DGIE|LIRPLYLIE|EYI|KRWIQRA..GIWPLNC|...A.CMVAAK..  
KASN.F..EGIE|LIRPLYYIE|EKDI|IRLFTQNA..GIWPLNC|...A.CMVAAK..  
KSNF.F..KDME|LIRPLYYVE|ERYI|KRWIQNS..GIWPLNC|...A.CMVAAK..  
KSTN.F..PGME|LIRPMYYIR|EKDI|LRFTQFS..GIWPLNC|...A.CMVAAK..  
RSQN.Y..EGIE|LIRPLYYVE|ESYI|ERFIQSS..GIWPLNC|...A.CMVAAK..  
KAKN.F..ENME|LIRPLYLIE|EYI|IRWMKST..GLMPLNC|...A.CMVAAK..  
RSDH.F..PEIE|LIRPLYYVA|EAD|KKWTQSM..GLWPLNC|...A.CMVAAK..  
KASN.F..ENME|LIRPMYYIE|ETDI|QKFIQSS..GIWPLNC|...A.CMVAAK..  
KSTN.F..DEME|LIRPLYYVR|EKDI|ERFIQSS..GIWPLNC|...A.CMVAAK..  
KSTN.F..EGIE|LIRPLYYIR|EEDI|IRWMTYT..GIWPLNC|...A.CMVAAK..  
KKN.F..KNIE|LIRPLYFVE|ESNV|KAFMKNA..GISPLNC|...G.CTVVAAAG.  
KQN.Y..EGLE|LIRPMYHIRE|QYI|ERFIQNS..GIWPLNC|...A.CMVAAK..  
KKN.F..EGLE|LIRPLYYVE|ESYI|QKFIQSS..GIWPLNC|...A.CMVAAK..  
KAQN.F..ENME|LIRPMYLI|EDNI|KKNWQSA..GIWPLNC|...A.CMVAAK..  
KSDN.Y..D.IE|LIRPLFYVE|EKSI|IKWVKNN..GILPMNC|...G.CTVVAAAS.  
KSTN.F..KGLE|LIRPLYYVD|EQYI|ERFTQSS..GIWPLNC|...A.CMVAAE..  
KADN.F..ENME|LIRPMYYIH|EKDI|IRFTQTS..GIWPLNC|...A.CMVAAK..  
KSTN.F..RGVE|LIRPMYYIR|EKHI|ENFTQNS..GIWPLNC|...A.CMVAAK..  
KSTN.F..DGME|LIRPMYYIR|EKHI|ERFTQNS..GIWPLNC|...A.CMVAAK..  
KSTN.F..ENIE|LIRPMYFIR|EEHIER|FIQIS..GILPIDC|...A.CMVAAK..  
KSTN.F..EGLE|LIRPLYYIR|EEDI|IRWVKYT..GLAPINC|...A.CTVVAAAN.  
KANN.F..ENME|LIRPMYFIE|EDYI|RRFINYS..GIWPLNC|...A.CMVAAE..  
KADN.F..D.IE|LIRPLFYVE|EKSI|IKWIRNN..GILAMNC|...G.CTVVAAAG.  
KAEN.F..ENME|LIRPLYLIE|EDYI|KRFIQNS..GIMPLNC|...A.CMVAAK..  
KAKN.F..EGLE|LIRPMFYIH|EDDI|RRYTLNA..GISPMNC|...G.CMVVAAAS.  
RASN.F..EGME|LIRPMYHIE|EYI|QRFIQSS..GIWPLNC|...A.CMVAAK..  
KSTN.F..AGLE|LIRPMYYIE|EKDI|ISFTQNS..GIQALNC|...A.CMVAAK..  
KSDN.F..D.IE|LIRPLFYVE|EKSI|IKWVKNN..GILPMNC|...G.CTVVAAAG.  
KSRN.Y..EGME|LIRPMYYIE|EKYI|KRFIQNS..GIWPLNC|...A.CMVAAK..  
KADN.F..EEIE|LIRPLFYIK|EKDI|IRFTKSS..GIQSMNC|...G.CTVVVAS.  
KAQN.F..EGME|LIRPLYFVE|EDNI|KRWIQYA..GIWPLNC|...A.CMVAAK..  
KQN.Y..EGIE|LIRPLYLIE|EYI|KRFIQYS..GIWPLNC|...A.CMVAAK..  
EADN.F..KDIE|LIRPMYYIE|EQSI|ITFIKNS..GLMALNC|...A.CMVSAK..  
KATN.F..KGLE|LIRPLYYVE|ESYI|ENFIQSS..GIWPLNC|...A.CMVAAK..  
KKN.F..EGIE|LIRPLYLIK|EHYI|ECYTKES..GIMPLNC|...A.CMVAAQ..  
HSTN.F..KDLE|LIRPMYYIE|EKHI|ERFTQNS..GIMPLNC|...A.CMVAAE..  
KSTN.F..EGLE|LIRPLYYVE|EVFI|ERFTQTN..GIWPLNC|...A.CMVAAK..  
HSSN.H..KGLE|LIRPMYYIE|ERHIE|EQFTQES..GIWPLNC|...A.CMVAAK..  
QADN.F..EGIE|LIRPLYYIE|EAI|KRFIKYT..GLWPLNC|...A.CMVAAE..  
KSTN.F..EGIE|LIRPLYYIE|ENI|QRFIQKS..GIWPLNC|...A.CMVVSAAG.  
TADN.F..DDIE|LIRPMFYIK|EHDI|IRFTQSS..GIQSMNC|...G.CTVVVAS.  
KADN.F..ENME|LIRPLYYIE|EKSI|KKNFIQHS..GIWPLNC|...A.CMISAK..  
KSTN.F..KGLE|LIRPLYHVE|ESAI|IDTFDES..GIWPLNC|...A.CMVAAK..  
KSLN.F..EGLE|LIRPLYYVE|EEH|KNTVNA..GLSPLNC|...G.CVVVAAK..  
KSN.F..EGLE|LIRPMYYIE|EEH|KNTVNA..GLSPMNC|...G.CIVVAAK..  
KSN.F..PGIE|LIRPMYYIE|EKHI|INTFKAS..GIAPLNC|...A.CMVAAH..  
NSTN.F..DGIQ|IIRPLYYIR|EESI|IKFIQNS..GIWPLNC|...A.CMVAAK..  
NSTN.F..DGIQ|IIRPLYYIR|EEH|VRFIQNS..GIWPLNC|...A.CMVAAK..  
KAQN.F..EGME|LIRPMYYIE|EHIE|EQFTNYT..GIWPLNC|...A.CMVAAK..  
KAQN.F..EGLE|LIRPLYLIE|ELYI|QRFIQNA..GIWPLNC|...A.CMVAAK..  
KADN.F..PDME|LIRPLYYVE|EYI|KRFIRYT..GLWPLNC|...A.CMVAAK..  
KAEN.F..EGIE|LIRPMYYIE|ERHIE|EQFTKAN..GIWPLNC|...A.CMVAAE..  
RATN.F..EDIE|LIRPMYLI|EQYI|KNTQSS..GIWPLNC|...A.CMVAAK..  
KSTN.F..ENME|LIRPLYYIE|EDHI|QRFQKS..GIWPLNC|...A.CMVAAK..  
KSKN.F..EGLE|LIRPMFYIH|EDDV|KRYTINS..GI|GF|MNC|...G.CIVVAAAG.  
KADN.F..EGIE|LIRPMYYIE|EMYI|KRFITQNA..GIWPLNC|...A.CMVAAK..  
KQN.Y..EGIE|LIRPLYYIE|EYI|KRFIQYS..GIWPLNC|...A.CMVAAK..  
KSTN.F..KDME|LIRPMYFIE|EHFI|ECYTNNEN..GIYPLNC|...A.CMVVAAAD.  
KAQN.F..ENIE|LIRPLYLIE|ENI|KRWINYS..GIWPLNC|...A.CMITAAE..  
KKN.F..ENLE|LIRPMYYIE|EDYI|KKFINYS..GIWPLNC|...A.CMVAAE..  
KKN.F..ENIE|LIRPLYYIE|EDSI|RRFINNS..GIWPLNC|...A.CMVAAE..  
KSTN.F..EGLE|LIRPLYYIN|EDDI|KRFINNA..GIAPMNC|...G.CIVVAAAG.  
KSN.F..EGLE|LIRPLYYVR|EKDI|ERFTQNS..GIWPLNC|...A.CMVAAK..  
RSTN.F..EGLE|LIRPLYYIE|EYI|QKFIQNS..GIWPLNC|...A.CMVVAAAG.  
KSDN.F..ENME|LIRPLYYIE|EVYI|ERFTQNN..GIWPLNC|...A.CMVAAK..  
KAKN.F..EGLE|LIRPLYYIE|EEDI|KRFVRNN..GLSTMNC|...G.CTVVAAAN.  
KAAN.F..EGLE|LIRPLYYVE|ECYI|QKFTQSS..GIWPLNC|...A.CMVAAK..  
KASN.Y..KGLQ|LIRPLYHIE|EAAI|IDFTENN..GIWPLNC|...A.CMVAAK..  
KSTN.F..EGLQ|LIRPLYHIE|EAAI|INTDDN..GIWPLNC|...A.CMVAAK..  
KSN.F..ENLE|LIRPMYYIE|EDYI|KRFIKNA..GIAPLNC|...A.CMVAAK..  
KAKN.F..KGIE|LIRPMYYIE|ESSI|EKFTRES..GISPMNC|...A.CMITAAE..  
KSTN.F..EGLE|LIRPLYYIE|EQSI|QRFITQNS..GIWPLNC|...A.CMVAAE..  
KSN.Y..ENME|LIRPLYYVE|EDYI|KRFITNNA..GIWPLNC|...A.CMVAAE..  
KSLN.F..EGLE|LIRPLYHVE|EAAI|IDFI|DHS..GIWPLNC|...A.CMVAAK..  
HATN.F..EGLE|LIRPMYYIH|EDDI|KRYTMNA..GISPMNC|...G.CVVVAAAG.  
KSN.F..ENME|LIRPMYYIE|EDNI|KKFINYC..GIWPLNC|...A.CMVVAAAG.  
RSDN.F..DNIE|LIRPMYFIE|EQSI|ITFIKNS..GILALNC|...A.CMVVAAK..  
RSSN.F..KGLE|LIRPLYYIE|ERYI|EYFTQES..GIWPLNC|...A.CMVVAAE..  
KSN.F..EGLE|LIRPMYLI|EYI|KRFINYS..GIWPLNC|...A.CMVVAAK..  
KAKN.F..ENIE|LIRPLYYIE|EDDI|KKFINYS..GIWPLNC|...A.CMITAAK..  
KAKN.F..EGIE|LIRPMYYIE|EQSI|QSFQSS..GIWPLNC|...A.CMVVAAK..  
KADN.F..EDIE|LIRPMMLVK|EKDI|IRWIKKS..GIQSMNC|...G.CTVVVAE..  
KAAN.F..EGLE|LIRPLYYVE|EYI|QRFITQNA..GIWPLNC|...A.CMVVAAK..  
KAAN.F..EGME|LIRPMYFIE|EDYI|QRFITQNS..GIWPLNC|...A.CMVVAAK..  
KSTN.F..TGLE|LIRPLYYIE|ENDI|KRFITESS..GIWPLNC|...A.CMVVAAE..  
KATN.F..EGIE|LIRPLYYIE|EKNI|QRFIQSS..GIWPLNC|...A.CMVVAAK..  
KSN.F..KGLE|LIRPLYFVH|EENI|QTFIQNS..GIWPLNC|...A.CMVVAAE..  
KATN.F..KDME|LIRPLYYIE|EDDI|KKFVRNN..GLATMNC|...G.CIVVAAAG.  
TAEN.F..DDIE|LIRPMMFVK|EKDI|IRWIKHS..GIQAMNC|...G.CTVVVAE..  
KSN.F..SDME|LIRPLYYIE|EKNI|QRFIQNS..GIWPLNC|...A.CMVVAAK..  
KSTN.Y..DGIE|LIRPLYHIE|ENVI|ADFTQWN..GIWPLNC|...A.CMVVAAK..  
KSDN.F..EGLE|LIRPMYYIH|EEDI|IHFTKSS..GLAPMNC|...G.CMVVAAK..  
KSLN.F..EGLE|LIRPMYYIH|EEDI|KRFITNNS..GLVPMNC|...G.CVVVAAK..  
KSTN.F..ENLE|LIRPLYYVE|EDYI|KRFITNNS..GIAPLNC|...A.CMVVAAE..  
KSN.Y..EKMQ|IIRPLYYIR|EESI|IRFIQNS..GIWPLNC|...A.CMVVAAK..  
EAEN.F..ENIE|LIRPMINVK|EKDI|VRWINHS..GIQAMNC|...G.CTVVVAE..  
KAAN.F..EGIE|LIRPLYYVE|EKYI|QNFQNS..GIWPLNC|...A.CMVVAAK..  
QAN.F..EGIE|LIRPMMFVK|EKDI|IRWLKHS..GIQSMNC|...G.CTVVVAE..



tr|A0A174A4G3|A0A174A4G3\_9CLOT KSN.F..EGIE LIRPLYLIE EAI KRFINYS..GIWPLNC..A.CMVAAK..

tr|A6TTE5|A6TTE5\_ALKMQ KSN.F..EGME LIRPLYLIE EAI IDFTESS..GIWPLNC..A.CMVAAK..

tr|U4KLZ0|U4KLZ0\_ACHP3 KAEN.F..DDIE LIRPLFYVE EKDI IRWVKYS..GIQAMNC..G.CTVAAAL..

tr|A0A0J8DD49|A0A0J8DD49\_CLOCY HANN.F..EGIQ LIRPMYYIE ETHI QRTQSS..GIFPLNC..A.CMVAAK..

tr|I7LJ37|I7LJ37\_9CLOT KAEN.F..EGME LIRPMYYIE ERYI EQFTKYA..GIWPLNC..A.CMVAAK..

tr|A0A2N1Q0A1|A0A2N1Q0A1\_9BACT EAEN.F..EGIE LIRPLFLVK EKDI IRWIKKS..GIQAMNC..G.CTVAAE..

tr|A0A2X2L491|A0A2X2L491\_9FUSO KSDN.F..D.IE LIRPLFYIE EKNI IKFVKNN..GIQAMNC..G.CTVAAE..

tr|A0A1M4M946|A0A1M4M946\_9FIRM KAAN.F..EGIE LIRPLYLIE EVNI RRRFIEYS..GIWPLNC..A.CMVAAE..

tr|A0A1H3RJV2|A0A1H3RJV2\_9FIRM KSN.F..EGIE LIRPLYLIE ETSI RRRFIEYS..GIWPLNC..A.CMVAAE..

tr|J4UUAU8|J4UUAU8\_9FIRM KSKN.F..DSIE LIRPLFLIE ESKI IKYTQNA..GLHMLNC..A.CMTAAK..

tr|A8MG47|A8MG47\_ALKOO KATN.F..ENME LIRPLYLVE EESI IDYTESN..GIWPLNC..A.CMVAAK..

tr|J6H3Q8|J6H3Q8\_9FIRM KSKN.F..DSIE LIRPLYLIE ESKI IRFTQNA..GINVLNC..A.CMVAAK..

tr|A0A1H5WXD0|A0A1H5WXD0\_9CLOT KAKN.F..EGME LIRPMYYIR ERHIEQFIQYA..GIWPLNC..A.CMVAAE..

tr|A0A1F8UHH3|A0A1F8UHH3\_9FIRM KSTN.F..EGLE LIRPLYLVR EDDI KRYYTINS..GITAMNC..G.CIVAAE..

tr|D1AIH2|D1AIH2\_SEBTE KADN.F..D.IE LIRPLYLVE EKDI IKFTANN..GILAMNC..G.CTVAAE..

tr|A0A1COADV0|A0A1COADV0\_9FIRM RSAH.F..ENIE LIRPMYYIR EDSV IKYTKNA..GLNMLNC..A.CMVAAK..

tr|A0A1K1NPP9|A0A1K1NPP9\_9BACT KMRK...MPLT IIRPLCLCQ EDDI RQYAEH..HYEKOT..Q..LCPYEH..

tr|A0A1H8CKM7|A0A1H8CKM7\_9BACT KMRK...MPLT IIRPLCLIP ESDI KTKWAE..GYKQKQ..K..LCPYET..

tr|X8GV28|X8GV28\_9FIRM HSTN.F..QGME LIRPLYLVR EADI IHWARYN..DLRFILC..ACRLTDCSVVGA..

tr|A0A173V180|A0A173V180\_9FIRM HSN.F..EGME LIRPLYLVR EEDI KAWRDYN..RLQFIQC..ACRFETENCSGCG..

tr|R5VBQ7|R5VBQ7\_9FIRM HSTN.F..EGME LIRPLYLVR EADI IHWAQYN..DLHFIOC..ACRFETEGASCGET..

tr|A0A1Y4HTK3|A0A1Y4HTK3\_9FIRM HSTN.F..PGME LIRPLYLVR EADI IAWARYN..DLEFLRC..ACRLTGETAN..

tr|A0A0J0TV39|A0A0J0TV39\_PAESO YLD..R..QDLT VIRPMVYID EYMTKKATKDF..NYPVIRK..NPPCADDGY..

tr|R9T2S6|R9T2S6\_9FIRM HSTN.F..EGME LIRPMYYIR EHHI EAWRDYN..NLHFLQC..ACKFTENSAFHG..

tr|A0A2U0UGL2|A0A2U0UGL2\_9BACE HSTN.F..EGME LIRPMYLIR EADI IHWKEYN..NLEFIOC..ACRFETEGASCGET..

tr|A0A2P4V576|A0A2P4V576\_CAERE TTK..D..GTLR VIRPLVMVR EKAL RNFAEDK..KL PVVAE..N.CPACFN..

tr|A0A158QJP7|A0A158QJP7\_HAEPCLSR..D..GTLR VIRPLIFVR ERAL REFAESK..GL PVVAE..N.CPACFN..

tr|A0A0N5AD38|A0A0N5AD38\_9BILA KIR..K..ADIR IIRPLIYVR EKNL KEFAEKN..LL PVIAE..N.CPACFE..

tr|A0A1I7ZGR2|A0A1I7ZGR2\_9BILA TTK..D..KKLR VIRPLVYVR EKEL RDAEON..NL PVPIE..N.CPACFS..

tr|H3FCD7|H3FCD7\_PRIPA TTR..D..TSLR VIRPLVLVR EKSL REFASSS..KL PVVAE..N.CPACFN..

tr|A0A0R3SHK2|A0A0R3SHK2\_HYMDI IIL..S..KNLR VIRPLVYVR EKMTRAFAEMA..GL PVPIE..N.CPACFQ..

tr|A0A1E1XBM3|A0A1E1XBM3\_9ACAR TVR..E..GDLR VTRPLVYVR EKNL RKFAEEK..RL PVIAE..N.CPACFE..

tr|R6Z006|R6Z006\_9FIRM FLQ..R..SQIE FIRPLIYAR EKDI ISFVKEY..NI PIIRK..STCTNDKT..

tr|A0A1V5UJ98|A0A1V5UJ98\_9BACT YLE..R..AQIT FIRPLILAS EKLI TRVQKDL..NL PLLP..ANCPNEKK..

tr|A0A1V6IJW5|A0A1V6IJW5\_9BACT YLE..R..AEIT FIRPLILVD EKLI IRVQKDL..KL PLLP..YNCNPENK..

tr|A0A1V6FCC4|A0A1V6FCC4\_9BACT YLE..R..AEIT FIRPLILSD EKLI TRVQKDL..KL PLLV..NNCPNEKK..

tr|A0A1V5HTP1|A0A1V5HTP1\_9BACT YLE..K..SKIE FIRPLVLAKESDLANMAKEE..EL PVLIA..STCPANGF..

tr|R7DSC3|R7DSC3\_9FIRM HLE..K..TDLV FIRPLILAR ESVIRCAEEM..HF PITS..LGCPNDKH..

tr|A0A1Y2CT79|A0A1Y2CT79\_9FUNG DSEN.Y..EGIT LIRPMVYIR EEDI RSIIMKN..DITCMTG..GCACVASS..

tr|W8JGB0|W8JGB0\_9CHLA DMVH...FNVT IIRPLIFIP EFWIRKFAKES..GFARVT..C.RCPVV..

tr|G4NP34|G4NP34\_CHLTA DMVN...FGIT IIRPLIFIP EDLIRKFAKES..GFARIT..C.RCPVI..

tr|A0A2A4YC14|A0A2A4YC14\_9BACT KMHL...YETT IIRPLIYIA EODI EFAKTY..NFARIT..C.QCPVGO..

tr|A0A0C1H3W6|A0A0C1H3W6\_9BACT HMQE...YGVY IIRPLIYIA EKNIRTFAQOQ..GFARIM..C.RCPVGO..

tr|A0A0C1CA75|A0A0C1CA75\_9BACT HMRE...YGVY IIRPLIYIA EKEIS TFAEQH..GFKRIT..C.RCPVGO..

tr|Q5L5X2|Q5L5X2\_CHLAB DMVH...FGIT IIRPLIFTP ESYIRKFAKES..GFARVT..C.RCPVV..

tr|A0A1F8JP57|A0A1F8JP57\_9BACT HMRD...YGVY IIRPLIYVS EESLRTFAKQY..GFMRMA..C.QCPVGO..

tr|A0A090D241|A0A090D241\_9BACT PMKR...YQVT IIRPLILVP EEMI EFAKQO..NFHRIM..C.QCPVGO..

tr|A0A2A4X7F6|A0A2A4X7F6\_9BACT RMVD...YGIT IVRPLLYVD ESSI VTWSKQK..GFARVT..C.MCPVGO..

tr|A0A212KNQ6|A0A212KNQ6\_9CHLA QMOK...YGVY IIRPLIYID EDDI KSFAAQY..GFARIS..C.QCPVGO..

tr|A0A2H0VXW5|A0A2H0VXW5\_9BACT HMRD...YGVY IIRPLIYID EESIRTFAKQN..DFARIS..C.GCPVGO..

tr|A0A1F8J4G6|A0A1F8J4G6\_9BACT YMH...YDVT IIRPLIYID EKSL SQFAQQY..GFQRIT..C.QCPVGO..

| tr|A0A0C1HRT1|A0A0C1HRT1\_9BACT | YMQK...YGIT | IIRPLIYIQ EEDI RAFAEQY..GFIRIM..C.RCPVGO.. |
| tr|A0A2E3LYW0|A0A2E3LYW0\_9BACT | HMQN...YEMT | ITRPLIYCS ESDIRFSKAN..GFARIL..C.RCPVGO.. |
| tr|A0A078LBF5|A0A078LBF5\_9CHLA | FMEV...YGIT | IIRPLIYIK EADI KTFAEQN..EFIRIM..C.RCPVGO.. |
| tr|A0A1F8JX30|A0A1F8JX30\_9BACT | FMEN...YQVK | IIRPMIYVD EKEITAFSEKN..NFLKIM..C.KCPIGT.. |
| tr|A0A2H0VPP5|A0A2H0VPP5\_9BACT | GMKD...YGVY | IIRPLIFV EEDIVSFAKMH..HFLRIS..C.QCPVGO.. |
| tr|T5K7U9|T5K7U9\_9CHLA | EMVY...FNNT | IIRPLIFTP EFLIRKFAKES..GFARVT..C.RCPVV.. |
| tr|A0A2H9SVY0|A0A2H9SVY0\_9BACT | CMRE...YGVY | IIRPLIFVP EKDI ITFAEHY..GFKRIM..C.RCPVGO.. |
| tr|V8TPD5|V8TPD5\_9CHLA | DMVH...FGIT | IIRPLIFTP ESLIKKFAKEH..GFARVT..C.RCPVV.. |
| tr|Q254M9|Q254M9\_CHLFF | GMVH...FDIT | IIRPLILTP ESWIRKFSKES..GFARVT..C.RCPVV.. |
| tr|A0A173E038|A0A173E038\_9CHLA | DMVH...FNIT | IIRPLIFIP ESWIQKFAKES..GFARVT..C.RCPVI.. |
| tr|A0A1A9HVJ8|A0A1A9HVJ8\_9CHLA | DMIH...FQVT | LLRPLIFTP EFWIRKFAKEH..GFARVT..C.RCPVI.. |
| tr|F8L6X1|F8L6X1\_SIMNZ | PMHD...YGVY | IIRPFIYVP EKEIVHFAIKH..GFARIT..C.QCPVGO.. |
| tr|A0A0U5JAB3|A0A0U5JAB3\_9BACT | RMQE...YGVY | IIRPFIYIA EODIRTFAQOQ..GFARIM..C.RCPVGO.. |
| tr|A0A1F8JQJ4|A0A1F8JQJ4\_9BACT | PMKR...FGVT | IIRPLLFVE ERQLVEFAKRY..GFARVT..C.QCPVSS.. |
| tr|Q928S7|Q928S7\_CHLNP | DMVH...FGVT | IIRPLIFTP EFWIRKFAKEN..GFARVT..C.RCPVV.. |
| tr|A0A2R8FAY6|A0A2R8FAY6\_9CHLA | DMIH...FGVT | IIRPLIFTP ELWIRKFAKEN..GFSRVT..C.RCPVI.. |
| tr|D6XVT5|D6XVT5\_WADCW | HMID...YGKT | IIRPLTYVS EEEIRRFAEQO..GFSRVM..C.RCPVGO.. |
| tr|A0A1M3CQO7|A0A1M3CQO7\_9CHLA | HMQE...YGVY | IIRPLIYIA EKDI RQFAEQO..GFMRIM..C.RCPVGO.. |
| tr|A0A1B6M060|A0A1B6M060\_9HEMI | YIK..E..GDLR | VIRPFSYVR ERSIRQFAESR..HL PIITPE..N.CPACFE.. |
| tr|C5LLP8|C5LLP8\_PERMS | FVQ...Q..RDIR | VIRPLVYCR EKQLAEFATEN..SL PVISD..N.CPACFA.. |
| tr|A0A0G4ESA4|A0A0G4ESA4\_VITBC | TQ...SDGAPLR | VCRPLVYAR ESATAEFAAAN..KL PVITD..N.CPACFA.. |
| tr|R5LGC8|R5LGC8\_9FIRM | KSDN..I..GDMK | LIRPMYLIR EDDINLWKNRN..NLNFKVC..ACRLNTK.. |
| tr|B8BUL4|B8BUL4\_THAPS | KIN..A..GDVS | VIRPLVYCR ESLMTDFAKSN..NL PVINE..N.CPACFE.. |
| tr|A0A2M9DVP8|A0A2M9DVP8\_9DELT | GVD..D..NPME | VIRPLVYLS EATVAKIHGHM..GL PLLDY..RCPHEQK.. |
| tr|A0A1V6GDW6|A0A1V6GDW6\_9DELT | EVV..E..GMVY | IIRPMVYLD SPLVRLHNHL..RL PVLVS..TCPYGEK.. |
| tr|A0A1F3PT60|A0A1F3PT60\_9BACT | GVP..G..SKLK | IIRPMIYLE ESLITKLHKS..NL PLLDQ..SCDYGEC.. |
| tr|E4XYA5|E4XYA5\_OIKDI | TVK..A..GDLR | VIRPLAFVRE TETRAFAESN..KL PVPIE..N.CPACFS.. |
| tr|A0A024FYH7|A0A024FYH7\_9STRA | WNH..A..RDIQ | IIRPLIYVRE FOLQFASDA..RL PVINE..N.CPACFE.. |
| tr|A0A2C6LF24|A0A2C6LF24\_9APIC | VIR..K..GDLR | VCRPLIIRTR EKETSAFVAN..RL PLIAD..N.CPACFA.. |
| tr|A1RTA9|A1RTA9\_PYRIL | YED.AEEKDLIP | IKPLKYIR EEEIAIYAYYH..GI PLMEL..ECPYVVT.. |
| tr|B1Y9F0|B1Y9F0\_PYRNV | HED.AEEKDLIP | IKPLKYVR EEEVAIYAYYH..GI PLMEL..ECPYVVA.. |
| tr|G7VHA5|G7VHA5\_9CREN | YED.AEEKDLIP | IKPLKYVR EEEVALYAYYH..GV PLMEL..ECPYVVA.. |
| tr|A3MWP7|A3MWP7\_PYRCJ | YED.AEEKDLVP | IKPLKYIR EEEIALYAYYH..GI PLMEL..ECPYVVA.. |
| tr|Q8ZVG4|Q8ZVG4\_PYRAE | YED.AEEKDLIP | IKPLKYIR EEEIALYAYYH..GL PLMEL..ECPYVTT.. |
| tr|A0A075MU89|A0A075MU89\_9ARCH | EPI.EYAG.GMK | IKPFVVELY EHEIVFYALQR..EIPFOSE..ECPYMNE.. |
| tr|A0A2H9LM96|A0A2H9LM96\_9ARCH | VTD.EVHPKFVQ | IKPFCEIP EKETALYAYVK..KIRFQSR..PCPYASE.. |
| tr|K0IMC3|K0IMC3\_NITGG | EPV.QYANNRMK | VKVPFIEIY EYEIFYALQR..EIPFOSE..ECPYMNE.. |
| tr|A0A0MOC0X2|A0A0MOC0X2\_9ARCH | VQ.QVSNSCFVQ | VKVPFCEIL EKESTLYAYVK..KIRFQNH..PCPYSSS.. |
| tr|A0A1Q7FAT4|A0A1Q7FAT4\_9ARCH | EPV.KYAS.GMK | VKVPFIEIY EYEIFYALQR..EIPFOSE..ECPYMNE.. |
| tr|A0A0V8RTY0|A0A0V8RTY0\_PYROC | VSGPASHPKFVR | VKVPFYEVL EKETALYAVIN..GLYTGFI..E.ECPYARL.. |
| tr|G0ECQ9|G0ECQ9\_PYRF1 | VSGPGHPKFVR | VKVPFYEVL EKETIYAVLN..GLYTGFI..E.ECPYARL.. |
| tr|D5U0T7|D5U0T7\_THEAM | VADKGGHGEFVR | IKPFYEVL EKEISAIYALVN..GLVEPGY..H.QCPYAEY.. |
| tr|D7D813|D7D813\_STAHD | VGPLDHPKFVR | VKVPFYEIL EKETTLYSILN..NLYPKFI..V.ECPYARF.. |
| tr|A2BKE0|A2BKE0\_HYPBU | ISGPGTHPRFVR | VKVPFYEVL EKETIYAVIN..GLYTGFI..E.ECPYARL.. |
| tr|A0A1Q9N5U5|A0A1Q9N5U5\_9ARCH | RLE.KIHPGFVR | VKPLIEIP EREILYAYFS..NIPLHS..Q.TCPYAAD.. |
| tr|A0A1J4UHT4|A0A1J4UHT4\_9ARCH | NDE.G.DSPFVR | IRPLTFVRE ERECALFALMN..GL PFHL..G.ECPYSTS.. |
| tr|A0A256YZ85|A0A256YZ85\_9CREN | TGSAKHPKFVR | VKVPFYEVL EKETTLYAILN..NIYPKHF..V.ECPYATQ.. |
| tr|A0A1Q9P748|A0A1Q9P748\_9ARCH | KPR.KIHSHLVP | RAKPFRTMP QAEIVMICYLN..DLEYOE..I.PCPYAVE.. |
| tr|A0A2U0RXT0|A0A2U0RXT0\_9ARCH | VLN.VIHPMLVQ | VKVPFLVEP EKEVVMYALK..GIEFOCI..I.DCPYATQ.. |
| tr|I3TF38|I3TF38\_THEC1 | VTT.GIASHEKFVR | IKPFI ETV EKETSIYALN..GLIEPEY..H.KCPYAEF.. |
| tr|A0A0P9E5Q3|A0A0P9E5Q3\_9ARCH | VTT.DIHPKLIR | VKPLCEVP EKEIALYALK..RIEFOGI..I.PCPYART.. |
| tr|A0A2D6LPK9|A0A2D6LPK9\_9ARCH | ISGNKKFDFVVR | IKPLIYETP EKEI IAYCALN..GIEHYSD..E.CCPYSWM.. |

|                                  |                                                       |
|----------------------------------|-------------------------------------------------------|
| tr A0A256YLA3 A0A256YLA3_9CREN   | I TGVIEHPKFIKRVKPFYFVLEKETITLYALLN.NLLEPV.FY.ECPYVEY. |
| tr A0A2626R8H3 A0A2626R8H3_9ARCH | ISGVGKEHDYFVQVRVKPLYMCSDEKERVRLTLK.GFTVQFT..ECPYSVE.  |
| tr V9IMM0 V9IMM0_APICE           | YLR..R..QDLRVVRPFVYVREKALRQFVETK.KLLVTR..G.I.GSSD.    |



Figure S2. Multisequence alignment produced by RoseTTAFold of two regions with the conserved cysteines of CyuA proteins. The first sequence and numbering correspond to MjCyuA.
